# Supplementary material for: Phosphoproteomic analysis identifies activated MET-axis PI3K/AKT and MAPK/ERK in lapatinib-resistant cancer cell line
Source: PubMed Central journal article supplement — Exp Mol Med. 2013 Nov 22;45(11):e64–. doi: 10.1038/emm.2013.115 (PMC3849569; doi:10.1038/emm.2013.115), 2013-11-22
Supplement: emm2013115x7.pdf [file emm2013115x7.pdf]

**Supplemental Table 1. A list of all phosphorylated proteins identified in SNU216 and SNU216-LR.**

| Accession   | Identified Proteins                                            | Symbol   | Entrez Gene Name                                   | Location        | Type(s)                 | SNU216-1 | SNU216-2 | SNU216-3 | SNU216-LR1 | SNU216-LR2 | SNU216-LR3 | STN   | p-value |
|-------------|----------------------------------------------------------------|----------|----------------------------------------------------|-----------------|-------------------------|----------|----------|----------|------------|------------|------------|-------|---------|
| IPI00292009 | palladin                                                       | PALLD    | palladin, cytoskeletal associated protein          | Cytoplasm       | other                   | 6        | 7        | 4        | 23         | 26         | 28         | 6.09  | 0.00000 |
| IPI00395887 | Thioredoxin domain-containing protein 1 precursor              | TMX1     | thioredoxin-related transmembrane prote            | Cytoplasm       | enzyme                  | 44       | 44       | 36       | 19         | 21         | 21         | -5.34 | 0.00000 |
| IPI00555610 | 313 kDa protein                                                |          |                                                    |                 |                         | 107      | 105      | 116      | 143        | 135        | 130        | 4.97  | 0.00000 |
| IPI00657687 | Isoform 1 of Actin-binding protein anillin                     | ANLN     | anillin, actin binding protein                     | Cytoplasm       | other                   | 8        | 7        | 8        | 20         | 24         | 25         | 4.60  | 0.00000 |
| IPI00304875 | Isoform 1 of HIRA-interacting protein 3                        | HIRIP3   | HIRA interacting protein 3                         | Nucleus         | other                   | 26       | 23       | 24       | 14         | 11         | 10         | -3.62 | 0.00002 |
| IPI00008868 | Microtubule-associated protein 1B                              | MAP1B    | microtubule-associated protein 1B                  | Cytoplasm       | other                   | 0        | 0        | 0        | 10         | 9          | 11         | 3.61  | 0.00002 |
| IPI00008918 | Isoform Beta of LIM domain and actin-binding protein 1         | LIMA1    | LIM domain and actin binding 1                     | Cytoplasm       | other                   | 55       | 54       | 52       | 71         | 73         | 67         | 3.61  | 0.00004 |
| IPI00748920 | splicing coactivator subunit SRm300                            | SRRM2    | serine/arginine repetitive matrix 2                | Nucleus         | other                   | 113      | 107      | 121      | 97         | 99         | 92         | -3.40 | 0.00004 |
| IPI00291802 | Isoform 3 of LIM domain only protein 7                         | LMO7     | LIM domain 7                                       | Cytoplasm       | enzyme                  | 8        | 9        | 9        | 19         | 22         | 19         | 3.42  | 0.00005 |
| IPI00744036 | tight junction protein 3                                       | TJP3     | tight junction protein 3 (zona occludens           | Plasma Membrane | other                   | 7        | 12       | 8        | 2          | 1          | 0          | -3.04 | 0.00007 |
| IPI00304589 | 182 kDa tankyrase 1-binding protein                            | TNKS1BP1 | tankyrase 1 binding protein 1, 182kDa              | Nucleus         | other                   | 50       | 48       | 47       | 72         | 56         | 59         | 3.10  | 0.00008 |
| IPI00029273 | Isoform 1 of Hepatocyte growth factor receptor precursor       | MET      | met proto-oncogene (hepatocyte growth              | Plasma Membrane | kinase                  | 0        | 0        | 0        | 8          | 5          | 12         | 3.01  | 0.00010 |
| IPI00009286 | Isoform 1 of Zinc finger protein HRX                           | MLL      | myeloid/lymphoid or mixed-lineage leuke            | Nucleus         | transcription regulator | 12       | 14       | 11       | 22         | 23         | 23         | 2.96  | 0.00010 |
| IPI00219301 | Myristoylated alanine-rich C-kinase substrate                  | MARCKS   | myristoylated alanine-rich protein kinase          | Plasma Membrane | other                   | 38       | 33       | 38       | 51         | 46         | 49         | 2.90  | 0.00014 |
| IPI00745518 | Microtubule-associated protein 4 isoform 1 variant (Fragment)  |          |                                                    |                 |                         | 53       | 57       | 58       | 63         | 75         | 70         | 2.88  | 0.00018 |
| IPI0013076  | Isoform 1 of FGFR1 oncogene partner                            | FGFR1OP  | FGFR1 oncogene partner                             | Cytoplasm       | other                   | 0        | 0        | 0        | 8          | 7          | 8          | 2.77  | 0.00021 |
| IPI00028481 | Ras-related protein Rab-8A                                     | RAB8A    | RAB8A, member RAS oncogene family                  | Plasma Membrane | other                   | 0        | 2        | 3        | 8          | 8          | 11         | 2.68  | 0.00026 |
| IPI00006196 | Isoform 2 of Nuclear mitotic apparatus protein 1               | NUMA1    | nuclear mitotic apparatus protein 1                | Nucleus         | other                   | 13       | 15       | 13       | 21         | 22         | 26         | 2.65  | 0.00028 |
| IPI00329115 | Isoform 1 of Protein C10orf47                                  | C10orf47 | chromosome 10 open reading frame 47                | unknown         | other                   | 2        | 0        | 0        | 10         | 7          | 6          | 2.57  | 0.00030 |
| IPI00289334 | Isoform 1 of Filamin-B                                         | FLNB     | filamin B, beta                                    | Cytoplasm       | other                   | 3        | 4        | 5        | 11         | 11         | 12         | 2.55  | 0.00030 |
| IPI00658152 | tensin-like SH2 domain containing 1                            | TNS3     | tensin 3                                           | unknown         | phosphatase             | 12       | 11       | 11       | 20         | 16         | 24         | 2.54  | 0.00030 |
| IPI00024062 | Band 4.1-like protein 1                                        | EPB41L1  | erythrocyte membrane protein band 4.1-l            | Plasma Membrane | other                   | 28       | 39       | 31       | 27         | 22         | 20         | -2.49 | 0.00044 |
| IPI00237884 | Isoform 1 of A-kinase anchor protein 12                        | AKAP12   | A kinase (PRKA) anchor protein 12                  | Cytoplasm       | transporter             | 11       | 15       | 11       | 21         | 17         | 25         | 2.51  | 0.00046 |
| IPI00216219 | Isoform Long of Tight junction protein ZO-1                    | TJP1     | (include: tight junction protein 1 (zona occludens | Plasma Membrane | other                   | 35       | 31       | 35       | 39         | 44         | 49         | 2.48  | 0.00046 |
| IPI00218753 | Isoform 3 of DNA topoisomerase 2-alpha                         | TOP2A    | topoisomerase (DNA) II alpha 170kDa                | Nucleus         | enzyme                  | 26       | 25       | 22       | 37         | 31         | 34         | 2.47  | 0.00046 |
| IPI00294742 | HDCMA18P protein                                               | LARP7    | La ribonucleoprotein domain family, mem            | unknown         | other                   | 9        | 6        | 6        | 13         | 16         | 15         | 2.45  | 0.00047 |
| IPI00020513 | Zyxin                                                          | ZYX      | zyxin                                              | Plasma Membrane | other                   | 19       | 23       | 22       | 29         | 33         | 29         | 2.36  | 0.00060 |
| IPI00021275 | Isoform 1 of Ephrin type-B receptor 2 precursor                | EPHB2    | EPH receptor B2                                    | Plasma Membrane | kinase                  | 8        | 9        | 7        | 0          | 0          | 4          | -2.33 | 0.00063 |
| IPI00298289 | Isoform 2 of Reticulon-4                                       | RTN4     | reticulon 4                                        | Cytoplasm       | other                   | 1        | 0        | 0        | 7          | 6          | 6          | 2.27  | 0.00068 |
| IPI00157144 | GYS1 protein                                                   | GYS1     | glycogen synthase 1 (muscle)                       | Cytoplasm       | enzyme                  | 7        | 0        | 0        | 10         | 9          | 8          | 2.21  | 0.00076 |
| IPI00010471 | Plastin-2                                                      | LCP1     | lymphocyte cytosolic protein 1 (L-plastin)         | Cytoplasm       | other                   | 1        | 1        | 2        | 7          | 7          | 6          | 2.20  | 0.00078 |
| IPI00178440 | Elongation factor 1-beta                                       | EEF1B2   | eukaryotic translation elongation factor 1         | Cytoplasm       | translation regulator   | 30       | 27       | 40       | 49         | 39         | 36         | 2.18  | 0.00078 |
| IPI00220740 | Isoform 2 of Nucleophosmin                                     | NPM1     | nucleophosmin (nucleolar phosphoprotein)           | Nucleus         | transcription regulator | 57       | 61       | 52       | 66         | 65         | 69         | 2.16  | 0.00081 |
| IPI00552897 | Isoform 1 of Mediator of DNA damage checkpoint protein 1       | MDC1     | mediator of DNA-damage checkpoint 1                | Nucleus         | other                   | 13       | 17       | 15       | 24         | 19         | 25         | 2.16  | 0.00083 |
| IPI00294840 | Absent in melanoma 1 protein                                   | AIM1     | (include: absent in melanoma 1                     | unknown         | other                   | 4        | 3        | 4        | 14         | 6          | 9          | 2.15  | 0.00084 |
| IPI00031605 | AHNAK nucleoprotein, isoform 2                                 | AHNAK    | AHNAK nucleoprotein                                | Nucleus         | other                   | 6        | 9        | 8        | 13         | 13         | 17         | 2.12  | 0.00098 |
| IPI00015029 | Prostaglandin E synthase 3                                     | PTGES3   | prostaglandin E synthase 3 (cytosolic)             | Cytoplasm       | enzyme                  | 11       | 10       | 19       | 29         | 15         | 18         | 2.11  | 0.00099 |
| IPI00032064 | Isoform A of A-kinase anchor protein 2                         |          |                                                    |                 |                         | 5        | 6        | 7        | 7          | 14         | 16         | 2.10  | 0.00099 |
| IPI00152011 | PTPL1-associated RhoGAP 1                                      | ARHGAP29 | Rho GTPase activating protein 29                   | Cytoplasm       | other                   | 0        | 4        | 4        | 8          | 10         | 8          | 2.10  | 0.00101 |
| IPI00015953 | Isoform 1 of Nucleolar RNA helicase 2                          | DDX21    | DEAD (Asp-Glu-Ala-Asp) box polypeptide             | Nucleus         | enzyme                  | 26       | 28       | 27       | 37         | 36         | 33         | 2.09  | 0.00101 |
| IPI00004233 | Isoform Long of Antigen KI-67                                  | MKI67    | antigen identified by monoclonal antibod           | Nucleus         | other                   | 10       | 10       | 14       | 18         | 15         | 22         | 2.08  | 0.00103 |
| IPI00027831 | Glutamate-rich WD repeat-containing protein 1                  | GRWD1    | glutamate-rich WD repeat containing 1              | Nucleus         | other                   | 0        | 3        | 0        | 7          | 7          | 6          | 2.02  | 0.00111 |
| IPI00419933 | Pleckstrin homology domain containing, family A member 2       | PLEKHA7  | pleckstrin homology domain containing, f           | Cytoplasm       | other                   | 0        | 2        | 2        | 3          | 7          | 10         | 2.02  | 0.00111 |
| IPI00304587 | dispatched B                                                   | DISP2    | dispatched homolog 2 (Drosophila)                  | unknown         | other                   | 8        | 4        | 5        | 0          | 0          | 0          | -2.02 | 0.00120 |
| IPI00017450 | Transcription initiation factor IIF alpha subunit              | GTF2F1   | general transcription factor IIF, polypeptic       | Nucleus         | transcription regulator | 5        | 6        | 6        | 12         | 12         | 11         | 2.01  | 0.00132 |
| IPI00219841 | DNA ligase 1                                                   | LIG1     | ligase I, DNA, ATP-dependent                       | Nucleus         | enzyme                  | 15       | 15       | 16       | 25         | 23         | 19         | 1.97  | 0.00144 |
| IPI00218136 | 137 kDa protein                                                | CGN      | cingulin                                           | Plasma Membrane | other                   | 0        | 0        | 2        | 6          | 7          | 5          | 1.95  | 0.00149 |
| IPI00020021 | Protein DEK                                                    | DEK      | DEK oncogene                                       | Nucleus         | transcription regulator | 10       | 10       | 11       | 22         | 14         | 14         | 1.92  | 0.00161 |
| IPI00061758 | PRR8 protein                                                   | RBM33    | RNA binding motif protein 33                       | unknown         | other                   | 0        | 7        | 8        | 0          | 0          | 0          | -1.89 | 0.00168 |
| IPI00031698 | Hypothetical protein MGC5509                                   | C2orf49  | chromosome 2 open reading frame 49                 | unknown         | other                   | 0        | 3        | 0        | 6          | 8          | 5          | 1.90  | 0.00177 |
| IPI00554788 | Keratin, type I cytoskeletal 18                                | KRT18    | keratin 18                                         | Cytoplasm       | other                   | 17       | 14       | 16       | 8          | 10         | 11         | -1.84 | 0.00179 |
| IPI00033054 | CTD (carboxy-terminal domain, RNA polymerase II, polypeptide / | CTDSPL2  | CTD (carboxy-terminal domain, RNA poly             | unknown         | other                   | 0        | 0        | 0        | 4          | 5          | 7          | 1.89  | 0.00179 |
| IPI00025156 | Isoform 1 of STIP1 homology and U box-containing protein 1     | STUB1    | STIP1 homology and U-box containing pr             | Cytoplasm       | enzyme                  | 9        | 11       | 11       | 6          | 3          | 6          | -1.84 | 0.00180 |
| IPI00376199 | Interferon regulatory factor 2 binding protein 2               | IRF2BP2  | interferon regulatory factor 2 binding prc         | Nucleus         | transcription regulator | 0        | 4        | 0        | 4          | 6          | 10         | 1.85  | 0.00195 |

**Supplemental Table 1. A list of all phosphorylated proteins identified in SNU216 and SNU216-LR.**

| Accession   | Identified Proteins                                                     | Symbol   | Entrez Gene Name                                                        | Location        | Type(s)                 | SNU216-1 | SNU216-2 | SNU216-3 | SNU216-LR1 | SNU216-LR2 | SNU216-LR3 | STN   | p-value |
|-------------|-------------------------------------------------------------------------|----------|-------------------------------------------------------------------------|-----------------|-------------------------|----------|----------|----------|------------|------------|------------|-------|---------|
| IPI00411635 | KIAA0802 protein                                                        |          |                                                                         |                 |                         | 10       | 11       | 9        | 18         | 14         | 16         | 1.83  | 0.00202 |
| IPI00005688 | Zinc finger protein 185                                                 | ZNF185   | zinc finger protein 185 (LIM domain)                                    | Nucleus         | other                   | 14       | 18       | 22       | 22         | 28         | 24         | 1.82  | 0.00206 |
| IPI00470483 | WD repeat domain 62                                                     | WDR62    | WD repeat domain 62                                                     | Nucleus         | other                   | 0        | 0        | 3        | 8          | 5          | 5          | 1.77  | 0.00219 |
| IPI00152881 | Shroom-related protein                                                  | SHROOM3  | shroom family member 3                                                  | Cytoplasm       | other                   | 0        | 0        | 0        | 5          | 4          | 6          | 1.76  | 0.00225 |
| IPI00337426 | Isoform 1 of BMP-2-inducible protein kinase                             | BMP2K    | BMP2 inducible kinase                                                   | Nucleus         | kinase                  | 0        | 0        | 0        | 6          | 4          | 5          | 1.76  | 0.00225 |
| IPI00217709 | Isoform Beta-1 of DNA topoisomerase 2-beta                              | TOP2B    | topoisomerase (DNA) II beta 180kDa                                      | Nucleus         | enzyme                  | 29       | 34       | 30       | 28         | 17         | 28         | -1.72 | 0.00251 |
| IPI00025512 | Heat-shock protein beta-1                                               | HSPB1    | heat shock 27kDa protein 1                                              | Cytoplasm       | other                   | 4        | 4        | 2        | 7          | 8          | 9          | 1.73  | 0.00265 |
| IPI00456887 | Scaffold attachment factor A2                                           | HNRNPUL2 | heterogeneous nuclear ribonucleoprotein                                 | Nucleus         | other                   | 42       | 38       | 41       | 44         | 49         | 50         | 1.71  | 0.00272 |
| IPI00396634 | OTTHUMP0000028561                                                       | KIAA1671 | KIAA1671                                                                | unknown         | other                   | 6        | 6        | 5        | 1          | 0          | 3          | -1.65 | 0.00274 |
| IPI00020418 | Ras-related protein R-Ras                                               | RRAS     | related RAS viral (r-ras) oncogene homolog                              | Cytoplasm       | enzyme                  | 1        | 0        | 2        | 4          | 5          | 7          | 1.70  | 0.00277 |
| IPI00009146 | FLN29 gene product                                                      | TRAFD1   | TRAF-type zinc finger domain containing                                 | unknown         | other                   | 5        | 6        | 3        | 0          | 0          | 0          | -1.62 | 0.00291 |
| IPI00719759 | Akt substrate AS250                                                     | RALGAPA2 | Ral GTPase activating protein, alpha subunit                            | Cytoplasm       | other                   | 6        | 4        | 4        | 0          | 0          | 0          | -1.62 | 0.00291 |
| IPI00291175 | Isoform 1 of Vinculin                                                   | VCL      | vinculin                                                                | Plasma Membrane | enzyme                  | 3        | 4        | 6        | 9          | 9          | 9          | 1.66  | 0.00291 |
| IPI00010746 | Phosphatidylserine synthase 1                                           | PTDSS1   | phosphatidylserine synthase 1                                           | Cytoplasm       | enzyme                  | 14       | 0        | 8        | 14         | 12         | 12         | 1.61  | 0.00336 |
| IPI00216654 | Isoform Beta of Nucleolar phosphoprotein p130                           | NOLC1    | nucleolar and coiled-body phosphoprotein                                | Nucleus         | transcription regulator | 10       | 10       | 5        | 14         | 13         | 13         | 1.59  | 0.00365 |
| IPI00645814 | KIAA1187 protein                                                        | MAP7D1   | MAP7 domain containing 1                                                | unknown         | other                   | 23       | 24       | 20       | 30         | 25         | 30         | 1.58  | 0.00370 |
| IPI00004273 | RNA binding motif protein 25                                            | RBM25    | RNA binding motif protein 25                                            | Nucleus         | other                   | 24       | 18       | 16       | 18         | 14         | 10         | -1.54 | 0.00377 |
| IPI00019502 | Myosin-9                                                                | MYH9     | myosin, heavy chain 9, non-muscle                                       | Cytoplasm       | enzyme                  | 15       | 19       | 11       | 11         | 10         | 9          | -1.54 | 0.00377 |
| IPI00019996 | modulator of estrogen induced transcription isoform b                   | SLTM     | SAFB-like, transcription modulator                                      | Nucleus         | other                   | 26       | 22       | 24       | 31         | 27         | 32         | 1.56  | 0.00388 |
| IPI00013743 | Hypothetical protein BUD13                                              | BUD13    | (includes BUD13 homolog (S. cerevisiae))                                | Nucleus         | other                   | 16       | 22       | 19       | 27         | 24         | 23         | 1.54  | 0.00400 |
| IPI00024579 | Postreplication repair protein RAD18                                    | RAD18    | RAD18 homolog (S. cerevisiae)                                           | Nucleus         | other                   | 3        | 0        | 0        | 6          | 5          | 5          | 1.52  | 0.00406 |
| IPI00025087 | Isoform 1 of Cellular tumor antigen p53                                 | TP53     | (includes tumor protein p53)                                            | Nucleus         | transcription regulator | 3        | 0        | 0        | 5          | 6          | 5          | 1.52  | 0.00406 |
| IPI00008708 | Ribosomal L1 domain-containing protein 1                                | RSL1D1   | ribosomal L1 domain containing 1                                        | Cytoplasm       | other                   | 13       | 20       | 14       | 19         | 22         | 22         | 1.51  | 0.00448 |
| IPI00295457 | myosin phosphatase-Rho interacting protein isoform 1                    | MPRIP    | myosin phosphatase Rho interacting protein                              | Cytoplasm       | other                   | 10       | 12       | 12       | 15         | 18         | 16         | 1.50  | 0.00449 |
| IPI00002135 | Transforming acidic coiled-coil-containing protein 3                    | TACC3    | transforming, acidic coiled-coil containing                             | Nucleus         | other                   | 0        | 0        | 0        | 5          | 2          | 6          | 1.49  | 0.00458 |
| IPI00032107 | Sulfate transporter                                                     | SLC26A2  | solute carrier family 26 (sulfate transporter)                          | Plasma Membrane | transporter             | 0        | 7        | 5        | 0          | 0          | 0          | -1.49 | 0.00465 |
| IPI00297859 | Isoform 1 of Myeloid/lymphoid or mixed-lineage leukemia protein 2       | MLL2     | myeloid/lymphoid or mixed-lineage leukemia 2                            | Nucleus         | transcription regulator | 5        | 5        | 3        | 0          | 0          | 0          | -1.49 | 0.00465 |
| IPI00006987 | ATP-dependent RNA helicase DDX24                                        | DDX24    | DEAD (Asp-Glu-Ala-Asp) box polypeptide                                  | Nucleus         | enzyme                  | 16       | 16       | 19       | 17         | 8          | 11         | -1.49 | 0.00474 |
| IPI00011635 | Isoform 2 of Bcl-2-like 13 protein                                      | BCL2L13  | BCL2-like 13 (apoptosis facilitator)                                    | Cytoplasm       | other                   | 11       | 7        | 5        | 4          | 3          | 4          | -1.47 | 0.00482 |
| IPI00719818 | nucleolar protein 5A                                                    | NOP56    | NOP56 ribonucleoprotein homolog (yeast)                                 | Nucleus         | other                   | 37       | 40       | 39       | 32         | 37         | 29         | -1.46 | 0.00496 |
| IPI00184317 | Isoform Short of Transcription intermediary factor 1-alpha              | TRIM24   | tripartite motif containing 24                                          | Nucleus         | transcription regulator | 0        | 0        | 4        | 7          | 5          | 5          | 1.49  | 0.00508 |
| IPI00394829 | hypothetical protein LOC286077                                          | FAM83H   | family with sequence similarity 83, member unknown                      | unknown         | other                   | 39       | 41       | 40       | 47         | 45         | 47         | 1.48  | 0.00512 |
| IPI00010080 | Serine/threonine-protein kinase OSR1                                    | OXSRI    | oxidative-stress responsive 1                                           | Nucleus         | kinase                  | 8        | 9        | 7        | 6          | 5          | 1          | -1.45 | 0.00520 |
| IPI00100151 | 5'-3' exoribonuclease 2                                                 | XRN2     | 5'-3' exoribonuclease 2                                                 | Nucleus         | enzyme                  | 16       | 15       | 13       | 8          | 13         | 9          | -1.44 | 0.00528 |
| IPI00294618 | Proline-rich protein PRCC                                               | PRCC     | papillary renal cell carcinoma (translocating)                          | Nucleus         | other                   | 0        | 0        | 5        | 6          | 5          | 7          | 1.45  | 0.00534 |
| IPI00019870 | Isoform Alpha of Caveolin-2                                             | CAV2     | caveolin 2                                                              | Plasma Membrane | other                   | 6        | 6        | 7        | 0          | 6          | 0          | -1.43 | 0.00543 |
| IPI00301294 | Protein C2orf17                                                         | FAM134A  | family with sequence similarity 134, member unknown                     | unknown         | other                   | 6        | 6        | 7        | 0          | 0          | 6          | -1.43 | 0.00543 |
| IPI00181905 | Isoform 1 of Protein KIAA1914                                           | AFAP1L2  | actin filament associated protein 1-like 2                              | Cytoplasm       | other                   | 0        | 1        | 2        | 5          | 5          | 4          | 1.44  | 0.00560 |
| IPI00302829 | Retinoblastoma-associated protein                                       | RB1      | retinoblastoma 1                                                        | Nucleus         | transcription regulator | 6        | 9        | 6        | 12         | 10         | 12         | 1.43  | 0.00569 |
| IPI00289819 | Cation-independent mannose-6-phosphate receptor precursor               | IGF2R    | insulin-like growth factor 2 receptor                                   | Plasma Membrane | transmembrane receptor  | 11       | 11       | 15       | 12         | 6          | 6          | -1.39 | 0.00592 |
| IPI00018274 | Isoform 1 of Epidermal growth factor receptor precursor                 | EGFR     | epidermal growth factor receptor                                        | Plasma Membrane | kinase                  | 5        | 5        | 5        | 10         | 8          | 9          | 1.40  | 0.00598 |
| IPI00289491 | Protein CASC3                                                           | CASC3    | cancer susceptibility candidate 3                                       | Nucleus         | other                   | 10       | 10       | 9        | 9          | 7          | 0          | -1.37 | 0.00618 |
| IPI00028122 | Isoform 1 of PC4 and SFRS1-interacting protein                          | PSIP1    | PC4 and SFRS1 interacting protein 1                                     | Nucleus         | other                   | 21       | 21       | 11       | 29         | 18         | 21         | 1.38  | 0.00633 |
| IPI00015973 | Band 4.1-like protein 2                                                 | EPB41L2  | erythrocyte membrane protein band 4.1-like 2                            | Plasma Membrane | other                   | 0        | 3        | 2        | 4          | 6          | 6          | 1.36  | 0.00646 |
| IPI00002564 | DNA-repair protein XRCC1                                                | XRCC1    | (includes X-ray repair complementing defective repair)                  | Nucleus         | other                   | 8        | 11       | 9        | 16         | 12         | 13         | 1.36  | 0.00658 |
| IPI00006937 | Ubiquitin-conjugating enzyme E2 J1                                      | UBE2J1   | ubiquitin-conjugating enzyme E2, J1, U                                  | Cytoplasm       | enzyme                  | 0        | 0        | 0        | 0          | 6          | 5          | 1.36  | 0.00658 |
| IPI00013933 | Isoform DPI of Desmoplakin                                              | DSP      | desmoplakin                                                             | Plasma Membrane | other                   | 4        | 3        | 4        | 5          | 9          | 8          | 1.36  | 0.00658 |
| IPI00477104 | Pleckstrin homology domain containing, family A member 6                | PLEKHA6  | pleckstrin homology domain containing, family A member 6                | unknown         | other                   | 4        | 6        | 0        | 9          | 7          | 6          | 1.36  | 0.00658 |
| IPI00101186 | Isoform 1 of Protein KIAA0690                                           | RRP12    | ribosomal RNA processing 12 homolog (S. cerevisiae)                     | Nucleus         | other                   | 4        | 4        | 4        | 0          | 0          | 0          | -1.36 | 0.00707 |
| IPI00045914 | Msx2-interacting protein                                                | SPEN     | spen homolog, transcriptional regulator (Drosophila)                    | Nucleus         | transcription regulator | 9        | 9        | 11       | 17         | 12         | 13         | 1.35  | 0.00727 |
| IPI00171475 | nuclear factor of activated T-cells, cytoplasmic, calcineurin-dependent | NFATC2IP | nuclear factor of activated T-cells, cytoplasmic, calcineurin-dependent | Nucleus         | other                   | 3        | 2        | 2        | 4          | 6          | 7          | 1.33  | 0.00749 |
| IPI00290684 | Bifunctional polynucleotide phosphatase/kinase                          | PNKP     | polynucleotide kinase 3'-phosphatase                                    | Nucleus         | kinase                  | 0        | 0        | 5        | 4          | 6          | 7          | 1.33  | 0.00749 |
| IPI00550191 | Protein C9orf78                                                         | C9orf78  | chromosome 9 open reading frame 78                                      | unknown         | other                   | 11       | 9        | 11       | 16         | 15         | 13         | 1.33  | 0.00749 |
| IPI00292059 | Nuclear pore complex protein Nup153                                     | NUP153   | nucleoporin 153kDa                                                      | Nucleus         | transporter             | 3        | 3        | 2        | 6          | 5          | 7          | 1.30  | 0.00797 |

**Supplemental Table 1. A list of all phosphorylated proteins identified in SNU216 and SNU216-LR.**

| Accession   | Identified Proteins                                             | Symbol        | Entrez Gene Name                              | Location            | Type(s)                  | SNU216-1 | SNU216-2 | SNU216-3 | SNU216-LR1 | SNU216-LR2 | SNU216-LR3 | STN   | p-value |
|-------------|-----------------------------------------------------------------|---------------|-----------------------------------------------|---------------------|--------------------------|----------|----------|----------|------------|------------|------------|-------|---------|
| IPI00413362 | signal-induced proliferation-associated 1 like 1                | SIPA1L1       | signal-induced proliferation-associated 1     | Cytoplasm           | other                    | 9        | 11       | 7        | 5          | 4          | 7          | -1.28 | 0.00836 |
| IPI00220754 | Isoform 1 of Gamma-adducin                                      | ADD3          | adducin 3 (gamma)                             | Cytoplasm           | other                    | 15       | 11       | 12       | 11         | 7          | 8          | -1.27 | 0.00843 |
| IPI00410079 | Cerebral protein-10                                             | FAM82A2       | family with sequence similarity 82, memb      | Cytoplasm           | other                    | 11       | 10       | 5        | 11         | 12         | 15         | 1.27  | 0.00852 |
| IPI00186711 | Isoform 1 isoform 6                                             | PLEC          | plectin                                       | Cytoplasm           | other                    | 21       | 27       | 25       | 22         | 17         | 20         | -1.26 | 0.00852 |
| IPI00019551 | Pleckstrin homology-like domain family A member 2 (Fragment)    | PHLDA2        | pleckstrin homology-like domain, family A     | Cytoplasm           | other                    | 0        | 3        | 0        | 5          | 4          | 5          | 1.27  | 0.00862 |
| IPI00032150 | Isoform 1 of Phosphatidate cytidyltransferase 2                 | CDS2          | CDP-diacylglycerol synthase (phosphatidate)   | Cytoplasm           | enzyme                   | 14       | 15       | 10       | 9          | 12         | 6          | -1.26 | 0.00865 |
| IPI00166009 | Isoform 1 of JmjC domain-containing histone demethylation prot  | KDM2A         | lysine (K)-specific demethylase 2A            | Nucleus             | other                    | 9        | 9        | 9        | 12         | 12         | 15         | 1.26  | 0.00868 |
| IPI00017292 | Isoform 1 of Beta-catenin                                       | CTNNB1        | catenin (cadherin-associated protein), bet    | Nucleus             | transcription regulator  | 9        | 11       | 8        | 13         | 13         | 14         | 1.26  | 0.00900 |
| IPI00465287 | ras responsive element binding protein 1 isoform 2              | RREB1         | ras responsive element binding protein 1      | Nucleus             | transcription regulator  | 3        | 5        | 3        | 8          | 7          | 6          | 1.24  | 0.00911 |
| IPI00003842 | Isoform 1 of Microtubule-associated protein 2                   | MAP2          | microtubule-associated protein 2              | Cytoplasm           | other                    | 26       | 28       | 26       | 22         | 22         | 22         | -1.24 | 0.00911 |
| IPI00005202 | Membrane-associated progesterone receptor component 2           | PGRMC2        | progesterone receptor membrane compo          | Nucleus             | ligand-dependent nuclear | 7        | 7        | 5        | 8          | 12         | 10         | 1.24  | 0.00926 |
| IPI00221325 | Ran-binding protein 2                                           | RANBP2        | RAN binding protein 2                         | Nucleus             | enzyme                   | 22       | 21       | 23       | 25         | 26         | 29         | 1.24  | 0.00928 |
| IPI00335641 | Isoform 1 of MKL/myocardin-like protein 2                       | MKL2          | MKL/myocardin-like 2                          | Nucleus             | transcription regulator  | 0        | 4        | 0        | 5          | 5          | 5          | 1.23  | 0.00928 |
| IPI00479997 | Stathmin                                                        | STMN1         | stathmin 1                                    | Cytoplasm           | other                    | 15       | 16       | 15       | 22         | 20         | 17         | 1.24  | 0.00928 |
| IPI00005024 | Isoform 1 of Myb-binding protein 1A                             | MYBBP1A       | MYB binding protein (P160) 1a                 | Nucleus             | transcription regulator  | 24       | 19       | 26       | 35         | 24         | 24         | 1.23  | 0.00956 |
| IPI00021831 | cAMP-dependent protein kinase type I-alpha regulatory subunit   | PRKAR1A       | protein kinase, cAMP-dependent, regulat       | Cytoplasm           | kinase                   | 3        | 5        | 4        | 8          | 7          | 7          | 1.22  | 0.00958 |
| IPI00031076 | Cyclin-C                                                        | CCNC          | cyclin C                                      | Nucleus             | other                    | 1        | 0        | 0        | 4          | 3          | 4          | 1.22  | 0.00967 |
| IPI00063605 | jub, ajuba homolog isoform 1                                    | AJUBA         | ajuba LIM protein                             | unknown             | transcription regulator  | 0        | 0        | 0        | 4          | 3          | 4          | 1.22  | 0.00967 |
| IPI00181396 | VPRBP protein                                                   | VPRBP         | Vpr (HIV-1) binding protein                   | Nucleus             | other                    | 0        | 0        | 0        | 4          | 4          | 3          | 1.22  | 0.00967 |
| IPI00401147 | Isoform 1 of Sad1/unc-84 protein-like 1                         | SUN1          | Sad1 and UNC84 domain containing 1            | Nucleus             | other                    | 0        | 0        | 0        | 5          | 5          | 0          | 1.22  | 0.00967 |
| IPI00439948 | Isoform 1 of RelA-associated inhibitor                          | PPP1R13L      | protein phosphatase 1, regulatory subuni      | Nucleus             | transcription regulator  | 0        | 0        | 0        | 5          | 5          | 5          | 1.22  | 0.00967 |
| IPI00479145 | Keratin, type I cytoskeletal 19                                 | KRT19 (huma   | keratin 19                                    | Cytoplasm           | other                    | 6        | 5        | 5        | 0          | 4          | 2          | -1.21 | 0.01046 |
| IPI00003843 | Isoform A1 of Tight junction protein ZO-2                       | TJP2          | tight junction protein 2 (zona occludens      | Plasma Membrane     | kinase                   | 60       | 57       | 52       | 50         | 47         | 56         | -1.19 | 0.01072 |
| IPI00100106 | resistance to inhibitors of cholinesterase 8 homolog A          | RIC8A         | resistance to inhibitors of cholinesterase    | Cytoplasm           | other                    | 4        | 3        | 6        | 9          | 8          | 6          | 1.21  | 0.01077 |
| IPI00168459 | Isoform 2 of Pleckstrin homology-like domain family B member    | PHLDB2        | pleckstrin homology-like domain, family       | Cytoplasm           | other                    | 4        | 4        | 5        | 7          | 7          | 9          | 1.21  | 0.01077 |
| IPI00159322 | Isoform 1 of Transcription factor 20                            | TCF20         | transcription factor 20 (AR1)                 | Nucleus             | transcription regulator  | 7        | 6        | 4        | 3          | 2          | 3          | -1.18 | 0.01089 |
| IPI00456359 | Isoform 1 of Ataxin-2-like protein                              | ATXN2L        | ataxin 2-like                                 | unknown             | other                    | 11       | 11       | 13       | 14         | 17         | 16         | 1.20  | 0.01091 |
| IPI00216592 | Isoform C1 of Heterogeneous nuclear ribonucleoproteins C1/C2    | HNRNPC        | heterogeneous nuclear ribonucleoprotein       | Nucleus             | other                    | 40       | 30       | 39       | 45         | 41         | 38         | 1.20  | 0.01100 |
| IPI00375454 | Isoform 2 of Telomere-associated protein RIF1                   | RIF1 (include | RAP1 interacting factor homolog (yeast)       | Nucleus             | other                    | 2        | 6        | 6        | 7          | 8          | 9          | 1.19  | 0.01102 |
| IPI00015924 | Isoform 1 of Tuftelin-interacting protein 11                    | TFIP11        | tuftelin interacting protein 11               | Extracellular Space | other                    | 10       | 8        | 7        | 5          | 4          | 6          | -1.18 | 0.01103 |
| IPI00290460 | Eukaryotic translation initiation factor 3 subunit 4            | EIF3G         | eukaryotic translation initiation factor 3, s | Cytoplasm           | translation regulator    | 2        | 3        | 3        | 7          | 5          | 5          | 1.18  | 0.01121 |
| IPI00419373 | Isoform 1 of Heterogeneous nuclear ribonucleoprotein A3         | HNRNPA3       | heterogeneous nuclear ribonucleoprotein       | Nucleus             | other                    | 4        | 4        | 4        | 1          | 2          | 1          | -1.17 | 0.01126 |
| IPI00619921 | Isoform 4 of Death-inducer obliterator 1                        | DIDO1         | death inducer-obliterator 1                   | Nucleus             | other                    | 12       | 14       | 14       | 16         | 19         | 17         | 1.17  | 0.01149 |
| IPI00152007 | Tumor endothelial marker 4                                      | ARHGEF17      | Rho guanine nucleotide exchange factor        | Cytoplasm           | other                    | 4        | 4        | 8        | 10         | 8          | 8          | 1.16  | 0.01175 |
| IPI00397376 | nuclear protein UKp68 isoform 1                                 | ZC3H14        | zinc finger CCCH-type containing 14           | Nucleus             | other                    | 4        | 4        | 0        | 5          | 8          | 5          | 1.16  | 0.01188 |
| IPI00290652 | remodeling and spacing factor 1                                 | RSF1 (include | remodeling and spacing factor 1               | Nucleus             | transcription regulator  | 28       | 19       | 17       | 26         | 30         | 21         | 1.16  | 0.01207 |
| IPI00022450 | TBC1 domain family member 5                                     | TBC1D5        | TBC1 domain family, member 5                  | unknown             | other                    | 5        | 6        | 2        | 3          | 0          | 0          | -1.14 | 0.01226 |
| IPI00001813 | CTD-binding SR-like protein rA9                                 | PHRF1         | PHD and ring finger domains 1                 | Nucleus             | other                    | 12       | 10       | 7        | 14         | 13         | 13         | 1.15  | 0.01226 |
| IPI00059687 | Isoform 1 of Protein C18orf25                                   | C18orf25      | chromosome 18 open reading frame 25           | unknown             | other                    | 5        | 1        | 4        | 4          | 9          | 6          | 1.14  | 0.01243 |
| IPI00010338 | Tissue factor precursor                                         | F3            | coagulation factor III (thromboplastin, tiss  | Plasma Membrane     | transmembrane receptor   | 1        | 2        | 2        | 4          | 5          | 4          | 1.14  | 0.01245 |
| IPI00237706 | MAP-kinase activating death domain-containing protein isoform   | MADD          | MAP-kinase activating death domain            | Cytoplasm           | other                    | 0        | 0        | 3        | 5          | 5          | 3          | 1.14  | 0.01245 |
| IPI00297254 | Signal-induced proliferation-associated 1-like protein 3        | SIPA1L3       | signal-induced proliferation-associated 1     | unknown             | other                    | 0        | 1        | 3        | 5          | 4          | 3          | 1.14  | 0.01245 |
| IPI00302592 | Filamin A, alpha                                                | FLNA          | filamin A, alpha                              | Cytoplasm           | other                    | 9        | 12       | 10       | 14         | 11         | 17         | 1.13  | 0.01268 |
| IPI00024773 | Isoform 1 of FERM, RhoGEF and pleckstrin domain-containing pr   | FARP1         | FERM, RhoGEF (ARHGEF) and pleckstrin d        | unknown             | other                    | 3        | 7        | 9        | 9          | 9          | 11         | 1.13  | 0.01268 |
| IPI00382733 | Transcription repressor                                         | LRRFIP1       | leucine rich repeat (in FLII) interacting pro | Cytoplasm           | other                    | 5        | 8        | 6        | 9          | 9          | 11         | 1.13  | 0.01268 |
| IPI00021537 | Isoform 1 of Opioid growth factor receptor                      | OGFR          | opioid growth factor receptor                 | Plasma Membrane     | other                    | 12       | 11       | 9        | 15         | 11         | 17         | 1.13  | 0.01279 |
| IPI00329547 | Isoform 1 of Zinc finger CCCH-type domain-containing protein 1  | ZC3H13        | zinc finger CCCH-type containing 13           | unknown             | other                    | 31       | 29       | 33       | 24         | 28         | 28         | -1.11 | 0.01286 |
| IPI00104050 | Thyroid hormone receptor-associated protein 3                   | THRAP3        | thyroid hormone receptor associated pro       | Nucleus             | transcription regulator  | 45       | 55       | 49       | 49         | 54         | 61         | 1.12  | 0.01288 |
| IPI00410693 | Isoform 1 of Plasminogen activator inhibitor 1 RNA-binding prot | SERPBP1       | SERPINE1 mRNA binding protein 1               | Nucleus             | other                    | 8        | 7        | 5        | 10         | 11         | 9          | 1.12  | 0.01288 |
| IPI00012442 | Ras-GTPase-activating protein-binding protein 1                 | G3BP1         | GTPase activating protein (SH3 domain) b      | Nucleus             | enzyme                   | 10       | 12       | 11       | 17         | 12         | 15         | 1.12  | 0.01306 |
| IPI00010865 | Casein kinase II subunit beta                                   | CSNK2B        | casein kinase 2, beta polypeptide             | Cytoplasm           | kinase                   | 0        | 0        | 10       | 9          | 11         | 0          | 1.11  | 0.01330 |
| IPI00170791 | Isoform 2 of InaD-like protein                                  | INADL         | InaD-like (Drosophila)                        | Plasma Membrane     | other                    | 6        | 0        | 5        | 9          | 5          | 7          | 1.11  | 0.01330 |
| IPI00024970 | Inner centromere protein                                        |               |                                               |                     |                          | 4        | 0        | 0        | 5          | 4          | 5          | 1.11  | 0.01358 |
| IPI00103756 | Mid-1-related chloride channel 4                                | CLCC1         | chloride channel CLIC-like 1                  | Cytoplasm           | ion channel              | 4        | 1        | 0        | 6          | 4          | 4          | 1.11  | 0.01358 |

**Supplemental Table 1. A list of all phosphorylated proteins identified in SNU216 and SNU216-LR.**

| Accession   | Identified Proteins                                                       | Symbol    | Entrez Gene Name                            | Location            | Type(s)                 | SNU216-1 | SNU216-2 | SNU216-3 | SNU216-LR1 | SNU216-LR2 | SNU216-LR3 | STN   | p-value |
|-------------|---------------------------------------------------------------------------|-----------|---------------------------------------------|---------------------|-------------------------|----------|----------|----------|------------|------------|------------|-------|---------|
| IPI00554761 | Nonhistone chromosomal protein HMG-14                                     |           |                                             |                     |                         | 2        | 2        | 2        | 4          | 5          | 5          | 1.11  | 0.01358 |
| IPI00158615 | Isoform 1 of THO complex subunit 2                                        | THOC2     | THO complex 2                               | Nucleus             | other                   | 5        | 3        | 5        | 8          | 8          | 6          | 1.09  | 0.01402 |
| IPI00556619 | TXNDC14 protein                                                           | TMX2      | thioredoxin-related transmembrane prote     | Nucleus             | enzyme                  | 0        | 5        | 7        | 4          | 8          | 10         | 1.09  | 0.01402 |
| IPI00645608 | Interferon regulatory factor 2 binding protein 1 variant                  | IRF2BP1   | interferon regulatory factor 2 binding prc  | Nucleus             | transcription regulator | 8        | 4        | 0        | 9          | 7          | 6          | 1.09  | 0.01402 |
| IPI00176532 | Isoform 1 of Junctophilin-2                                               | JPH2      | junctophilin 2                              | Cytoplasm           | enzyme                  | 8        | 7        | 8        | 10         | 12         | 11         | 1.09  | 0.01404 |
| IPI00004671 | Golgin subfamily B member 1                                               | GOLGB1    | golgin B1                                   | Cytoplasm           | other                   | 5        | 1        | 0        | 6          | 4          | 5          | 1.08  | 0.01423 |
| IPI00011592 | Cytoplasmic dynein 1 light intermediate chain 2                           | DYNC1L2   | dynein, cytoplasmic 1, light intermediate   | Cytoplasm           | other                   | 4        | 2        | 1        | 2          | 6          | 7          | 1.08  | 0.01423 |
| IPI00166044 | Isoform 1 of Regulatory associated protein of mTOR                        | RPTOR     | regulatory associated protein of MTOR, c    | Cytoplasm           | other                   | 6        | 5        | 4        | 0          | 5          | 0          | -1.08 | 0.01439 |
| IPI00000858 | Isoform 1 of Negative elongation factor E                                 | RDBP      | RD RNA binding protein                      | Nucleus             | other                   | 0        | 0        | 0        | 3          | 4          | 3          | 1.08  | 0.01461 |
| IPI00006171 | Isoform 2 of Nuclear factor related to kappa-B-binding protein            | NFRKB     | nuclear factor related to kappaB binding    | Nucleus             | transcription regulator | 0        | 0        | 0        | 4          | 3          | 3          | 1.08  | 0.01461 |
| IPI00432363 | Microtubule-actin crosslinking factor 1, isoform 4                        | MACF1     | microtubule-actin crosslinking factor 1     | Cytoplasm           | enzyme                  | 1        | 0        | 1        | 4          | 3          | 3          | 1.08  | 0.01461 |
| IPI00440241 | PREDICTED: hypothetical protein LOC79649 isoform 3                        |           |                                             |                     |                         | 1        | 1        | 1        | 2          | 4          | 4          | 1.08  | 0.01461 |
| IPI00007955 | Isoform 1 of Tripartite motif protein 16                                  | TRIM16    | tripartite motif containing 16              | Cytoplasm           | transcription regulator | 5        | 4        | 0        | 0          | 0          | 0          | -1.08 | 0.01483 |
| IPI00217418 | Isoform 2 of Rho-GTPase-activating protein 12                             | ARHGAP12  | Rho GTPase activating protein 12            | Cytoplasm           | other                   | 0        | 4        | 5        | 0          | 0          | 0          | -1.08 | 0.01483 |
| IPI00005154 | Structure-specific recognition protein 1                                  | SSRP1     | structure specific recognition protein 1    | Nucleus             | other                   | 14       | 10       | 11       | 7          | 9          | 9          | -1.07 | 0.01491 |
| IPI00396378 | Isoform B1 of Heterogeneous nuclear ribonucleoproteins A2/B1              | HNRNPA2B1 | heterogeneous nuclear ribonucleoprotein     | Nucleus             | other                   | 4        | 5        | 5        | 6          | 10         | 7          | 1.08  | 0.01515 |
| IPI00746976 | Dynamain-like protein DYNIV-11 variant                                    | DNM1L     | dynamain 1-like                             | Cytoplasm           | enzyme                  | 4        | 5        | 5        | 7          | 7          | 9          | 1.08  | 0.01515 |
| IPI00456750 | Niban-like protein                                                        | FAM129B   | family with sequence similarity 129, mem    | Cytoplasm           | other                   | 10       | 8        | 7        | 13         | 11         | 11         | 1.07  | 0.01518 |
| IPI00445401 | Isoform 2 of HECT, UBA and WWE domain-containing protein 1                | HUWE1     | HECT, UBA and WWE domain containing         | Nucleus             | transcription regulator | 20       | 21       | 23       | 25         | 22         | 29         | 1.07  | 0.01526 |
| IPI00398505 | Ubiquitin carboxyl-terminal hydrolase 24                                  | USP24     | ubiquitin specific peptidase 24             | unknown             | peptidase               | 6        | 5        | 4        | 10         | 7          | 7          | 1.06  | 0.01536 |
| IPI00239406 | Isoform 2 of Nesprin-2                                                    | SYNE2     | spectrin repeat containing, nuclear envelc  | Nucleus             | other                   | 6        | 5        | 5        | 3          | 3          | 2          | -1.06 | 0.01560 |
| IPI00289601 | Histone deacetylase 2                                                     | HDAC2     | histone deacetylase 2                       | Nucleus             | transcription regulator | 15       | 14       | 15       | 19         | 16         | 20         | 1.06  | 0.01570 |
| IPI00014068 | Isoform 1 of Serine/threonine-protein kinase PAK 4                        | PAK4      | p21 protein (Cdc42/Rac)-activated kinase    | Cytoplasm           | kinase                  | 14       | 15       | 16       | 19         | 19         | 18         | 1.05  | 0.01588 |
| IPI00008529 | 60S acidic ribosomal protein P2                                           | RPLP2     | ribosomal protein, large, P2                | Cytoplasm           | other                   | 13       | 14       | 19       | 21         | 14         | 22         | 1.05  | 0.01596 |
| IPI00010414 | PDZ and LIM domain protein 1                                              | PDLIM1    | PDZ and LIM domain 1                        | Cytoplasm           | transcription regulator | 6        | 8        | 3        | 7          | 9          | 10         | 1.04  | 0.01615 |
| IPI00015833 | Coiled-coil-helix-coiled-coil-helix domain-containing protein 3           | CHCHD3    | coiled-coil-helix-coiled-coil-helix domain  | Cytoplasm           | other                   | 6        | 5        | 6        | 8          | 9          | 9          | 1.04  | 0.01615 |
| IPI00171422 | CDNA PSEC0094 fis, clone NT2RP2001499, weakly similar to PRC              | TMEM87A   | transmembrane protein 87A                   | unknown             | other                   | 6        | 6        | 5        | 5          | 3          | 0          | -1.04 | 0.01617 |
| IPI00329572 | Protein kinase C and casein kinase substrate in neurons protein : PACSIN3 | PACSIN3   | protein kinase C and casein kinase substr   | Cytoplasm           | other                   | 12       | 9        | 9        | 12         | 15         | 13         | 1.04  | 0.01617 |
| IPI00177498 | Hypothetical protein DKFZp451D112                                         | LIMCH1    | LIM and calponin homology domains 1         | unknown             | other                   | 2        | 4        | 3        | 5          | 6          | 6          | 1.04  | 0.01620 |
| IPI00219018 | Glyceraldehyde-3-phosphate dehydrogenase                                  | GAPDH     | glyceraldehyde-3-phosphate dehydrogen       | Cytoplasm           | enzyme                  | 4        | 4        | 3        | 1          | 1          | 2          | -1.04 | 0.01621 |
| IPI00183002 | Isoform 1 of Protein phosphatase 1 regulatory subunit 12A                 | PPP1R12A  | protein phosphatase 1, regulatory subunit   | Cytoplasm           | phosphatase             | 6        | 8        | 4        | 9          | 10         | 8          | 1.03  | 0.01664 |
| IPI00386119 | Isoform 5 of Splicing factor 1                                            | SF1       | splicing factor 1                           | Nucleus             | transcription regulator | 24       | 24       | 30       | 25         | 29         | 36         | 1.03  | 0.01675 |
| IPI00328867 | Isoform 2 of Proto-oncogene tyrosine-protein kinase Src                   | SRC       | v-src sarcoma (Schmidt-Ruppin A-2) viral    | Cytoplasm           | kinase                  | 1        | 5        | 4        | 5          | 7          | 6          | 1.02  | 0.01691 |
| IPI00306825 | Isoform 1 of Tumor protein D54                                            | TPD52L2   | tumor protein D52-like 2                    | Cytoplasm           | other                   | 3        | 4        | 4        | 7          | 6          | 6          | 1.00  | 0.01736 |
| IPI00298884 | Putative RNA-binding protein 16                                           | SCAF8     | SR-related CTD-associated factor 8          | Nucleus             | other                   | 0        | 0        | 3        | 4          | 4          | 4          | 1.00  | 0.01746 |
| IPI00418169 | annexin A2 isoform 1                                                      | ANXA2     | annexin A2                                  | Plasma Membrane     | other                   | 2        | 2        | 0        | 4          | 3          | 5          | 1.00  | 0.01746 |
| IPI00017451 | Splicing factor 3 subunit 1                                               | SF3A1     | splicing factor 3a, subunit 1, 120kDa       | Nucleus             | other                   | 27       | 23       | 23       | 20         | 21         | 21         | -0.99 | 0.01808 |
| IPI00012079 | Eukaryotic translation initiation factor 4B                               | EIF4B     | eukaryotic translation initiation factor 4B | Cytoplasm           | translation regulator   | 10       | 8        | 5        | 14         | 10         | 8          | 0.99  | 0.01842 |
| IPI00022373 | RNA-binding protein NOB1                                                  | NOB1      | NIN1/RPN12 binding protein 1 homolog        | Nucleus             | other                   | 8        | 8        | 8        | 11         | 14         | 8          | 0.98  | 0.01851 |
| IPI00006099 | Ribosome biogenesis protein BMS1 homolog                                  | BMS1      | BMS1 homolog, ribosome assembly prote       | Nucleus             | other                   | 5        | 4        | 4        | 2          | 1          | 3          | -0.98 | 0.01870 |
| IPI00020956 | Hepatoma-derived growth factor                                            | HDFG      | hepatoma-derived growth factor              | Extracellular Space | growth factor           | 24       | 21       | 21       | 31         | 23         | 23         | 0.98  | 0.01901 |
| IPI00154915 | Isoform 1 of Partitioning-defective 3 homolog                             | PARD3     | par-3 partitioning defective 3 homolog (C   | Plasma Membrane     | other                   | 7        | 5        | 0        | 7          | 9          | 5          | 0.98  | 0.01901 |
| IPI00293884 | Kinesin-like protein KIF23                                                | KIF23     | kinesin family member 23                    | Cytoplasm           | other                   | 6        | 4        | 3        | 8          | 5          | 8          | 0.98  | 0.01901 |
| IPI00759546 | Isoform 5 of Afadin                                                       | MLLT4     | myeloid/lymphoid or mixed-lineage leuke     | Nucleus             | other                   | 19       | 15       | 19       | 16         | 14         | 13         | -0.97 | 0.01912 |
| IPI00640318 | Hypothetical protein FLJ23236                                             | PDS5B     | PDS5, regulator of cohesion maintenance     | Nucleus             | other                   | 9        | 8        | 9        | 8          | 14         | 13         | 0.96  | 0.01951 |
| IPI00020719 | Isoform 1 of Mitochondrial antiviral signaling protein                    | MAVS      | mitochondrial antiviral signaling protein   | Cytoplasm           | other                   | 7        | 0        | 6        | 7          | 8          | 7          | 0.96  | 0.01953 |
| IPI00218529 | Isoform AML-II of Runt-related transcription factor 1                     | RUNX1     | runt-related transcription factor 1         | Nucleus             | transcription regulator | 4        | 5        | 5        | 3          | 2          | 2          | -0.95 | 0.01973 |
| IPI00045360 | Protein capicua homolog                                                   | CIC       | capicua homolog (Drosophila)                | unknown             | other                   | 2        | 1        | 4        | 7          | 4          | 3          | 0.95  | 0.01979 |
| IPI00167053 | Isoform 1b of Oxysterol-binding protein-related protein 3                 | OSBPL3    | oxysterol binding protein-like 3            | Cytoplasm           | other                   | 3        | 3        | 0        | 4          | 4          | 6          | 0.95  | 0.01979 |
| IPI00177743 | 251 kDa protein                                                           | ZNF318    | zinc finger protein 318                     | Nucleus             | other                   | 0        | 2        | 4        | 4          | 0          | 9          | 0.95  | 0.01979 |
| IPI00220490 | SH3 and multiple ankyrin repeat domains 2 isoform 1                       | SHANK2    | SH3 and multiple ankyrin repeat domains     | Plasma Membrane     | other                   | 2        | 2        | 3        | 5          | 5          | 4          | 0.95  | 0.01979 |
| IPI00737871 | PREDICTED: similar to angiominin                                          | KIAA0754  | KIAA0754                                    | unknown             | other                   | 3        | 1        | 3        | 6          | 4          | 4          | 0.95  | 0.01979 |
| IPI00296830 | Isoform 1 of Leucine zipper protein 1                                     | LUZP1     | leucine zipper protein 1                    | Nucleus             | other                   | 7        | 7        | 0        | 7          | 8          | 8          | 0.95  | 0.02005 |
| IPI00409671 | DEAD box polypeptide 42 protein                                           | DDX42     | DEAD (Asp-Glu-Ala-Asp) box polypeptide      | Cytoplasm           | enzyme                  | 9        | 9        | 11       | 12         | 12         | 14         | 0.94  | 0.02040 |

**Supplemental Table 1. A list of all phosphorylated proteins identified in SNU216 and SNU216-LR.**

| Accession   | Identified Proteins                                           | Symbol      | Entrez Gene Name                          | Location            | Type(s)                 | SNU216-1 | SNU216-2 | SNU216-3 | SNU216-LR1 | SNU216-LR2 | SNU216-LR3 | STN   | p-value |
|-------------|---------------------------------------------------------------|-------------|-------------------------------------------|---------------------|-------------------------|----------|----------|----------|------------|------------|------------|-------|---------|
| IPI00179713 | insulin-like growth factor 2 mRNA binding protein 2 isoform a | IGF2BP2     | insulin-like growth factor 2 mRNA bindin  | Cytoplasm           | translation regulator   | 5        | 5        | 6        | 7          | 7          | 10         | 0.94  | 0.02042 |
| IPI00291711 | pleckstrin homology domain containing, family G, member 3     | PLEKHG3     | pleckstrin homology domain containing, f  | unknown             | other                   | 1        | 0        | 0        | 3          | 2          | 4          | 0.94  | 0.02088 |
| IPI00431749 | Keratin b20                                                   | KRT80       | keratin 80                                | unknown             | other                   | 1        | 0        | 1        | 3          | 3          | 4          | 0.94  | 0.02088 |
| IPI00604756 | Nuclear receptor-binding protein                              | NRBP1       | nuclear receptor binding protein 1        | Nucleus             | kinase                  | 0        | 0        | 0        | 1          | 4          | 4          | 0.94  | 0.02088 |
| IPI00646493 | COPA protein                                                  | COPA        | coatomer protein complex, subunit alpha   | Cytoplasm           | transporter             | 1        | 1        | 0        | 3          | 2          | 4          | 0.94  | 0.02088 |
| IPI00009101 | Transcriptional activator SRCAP                               | SRCAP       | Snf2-related CREBBP activator protein     | Cytoplasm           | transcription regulator | 0        | 3        | 5        | 0          | 0          | 0          | -0.94 | 0.02388 |
| IPI00103552 | mucin 16                                                      | MUC16       | mucin 16, cell surface associated         | Extracellular Space | other                   | 0        | 3        | 5        | 0          | 0          | 0          | -0.94 | 0.02388 |
| IPI00299463 | Nibrin                                                        | NBN         | nibrin                                    | Nucleus             | other                   | 3        | 2        | 4        | 0          | 0          | 0          | -0.94 | 0.02388 |
| IPI00328987 | Bystin                                                        | BYSL        | bystin-like                               | Cytoplasm           | other                   | 3        | 0        | 5        | 0          | 0          | 0          | -0.94 | 0.02388 |
| IPI00412771 | CD2-associated protein                                        | CD2AP       | CD2-associated protein                    | Cytoplasm           | other                   | 4        | 4        | 1        | 0          | 0          | 0          | -0.94 | 0.02388 |
| IPI00554560 | Hypothetical protein 101F10.1                                 | C16orf88    | chromosome 16 open reading frame 88       | unknown             | other                   | 4        | 0        | 4        | 0          | 0          | 0          | -0.94 | 0.02388 |
| IPI00174962 | Molecule interacting with Rab13                               | MICALL1     | MICAL-like 1                              | Cytoplasm           | other                   | 4        | 5        | 6        | 2          | 0          | 5          | -0.93 | 0.02416 |
| IPI00031651 | MGC11257 protein                                              | C7orf50     | chromosome 7 open reading frame 50        | unknown             | other                   | 3        | 2        | 3        | 5          | 5          | 5          | 0.93  | 0.02429 |
| IPI00101942 | Calmin                                                        | CLMN        | calmin (calponin-like, transmembrane)     | Cytoplasm           | other                   | 9        | 11       | 5        | 8          | 6          | 3          | -0.93 | 0.02429 |
| IPI00220835 | Protein transport protein Sec61 beta subunit                  | SEC61B      | Sec61 beta subunit                        | Cytoplasm           | transporter             | 9        | 7        | 9        | 5          | 7          | 5          | -0.93 | 0.02429 |
| IPI00065931 | A-kinase anchor protein 13 isoform 1                          | AKAP13      | A kinase (PRKA) anchor protein 13         | Cytoplasm           | other                   | 12       | 6        | 13       | 12         | 14         | 14         | 0.93  | 0.02451 |
| IPI00064212 | KIAA1802 protein (Fragment)                                   | CHAMP1      | chromosome alignment maintaining phos     | Nucleus             | other                   | 30       | 31       | 26       | 35         | 28         | 35         | 0.92  | 0.02483 |
| IPI00031812 | Nuclease sensitive element-binding protein 1                  | YBX1        | Y box binding protein 1                   | Nucleus             | transcription regulator | 6        | 5        | 7        | 8          | 10         | 8          | 0.92  | 0.02489 |
| IPI00176706 | Splicing factor 45                                            | RBM17       | RNA binding motif protein 17              | Nucleus             | other                   | 14       | 14       | 17       | 11         | 14         | 11         | -0.90 | 0.02527 |
| IPI00303797 | B-Raf proto-oncogene serine/threonine-protein kinase          | BRAF        | v-raf murine sarcoma viral oncogene hon   | Cytoplasm           | enzyme                  | 9        | 9        | 10       | 8          | 7          | 5          | -0.90 | 0.02539 |
| IPI00384357 | Isoform 1 of FYVE, RhoGEF and PH domain-containing protein 3  | FGD3        | FYVE, RhoGEF and PH domain containing     | Cytoplasm           | other                   | 0        | 4        | 4        | 0          | 0          | 2          | -0.90 | 0.02574 |
| IPI00021518 | Isoform 1 of DNA damage-binding protein 2                     | DDB2        | damage-specific DNA binding protein 2,    | Nucleus             | other                   | 10       | 9        | 0        | 8          | 11         | 9          | 0.90  | 0.02574 |
| IPI00103654 | Hypothetical protein                                          | PPP4R2      | protein phosphatase 4, regulatory subuni  | Cytoplasm           | other                   | 1        | 2        | 1        | 3          | 5          | 2          | 0.90  | 0.02591 |
| IPI00294739 | SAM domain and HD domain-containing protein 1                 | SAMHD1      | SAM domain and HD domain 1                | Nucleus             | enzyme                  | 0        | 0        | 2        | 3          | 4          | 3          | 0.90  | 0.02591 |
| IPI00294879 | Ran GTPase-activating protein 1                               | RANGAP1     | Ran GTPase activating protein 1           | Cytoplasm           | other                   | 2        | 1        | 1        | 3          | 3          | 4          | 0.90  | 0.02591 |
| IPI00024291 | Bcl2-antagonist of cell death                                 | BAD         | BCL2-associated agonist of cell death     | Cytoplasm           | other                   | 3        | 5        | 2        | 3          | 7          | 7          | 0.90  | 0.02615 |
| IPI00030915 | Ubiquitin carboxyl-terminal hydrolase 8                       | USP8        | ubiquitin specific peptidase 8            | Cytoplasm           | peptidase               | 5        | 0        | 4        | 5          | 6          | 6          | 0.90  | 0.02615 |
| IPI00009032 | Lupus La protein                                              | SSB         | Sjogren syndrome antigen B (autoantigen   | Nucleus             | enzyme                  | 39       | 42       | 36       | 34         | 36         | 36         | -0.89 | 0.02662 |
| IPI00003419 | Small acidic protein                                          | C11orf58    | chromosome 11 open reading frame 58       | unknown             | other                   | 15       | 11       | 14       | 14         | 18         | 17         | 0.89  | 0.02695 |
| IPI00301421 | Isoform 1 of Nuclear-interacting partner of ALK               | ZC3HC1      | zinc finger, C3HC-type containing 1       | Nucleus             | other                   | 10       | 13       | 17       | 17         | 16         | 16         | 0.89  | 0.02695 |
| IPI00334715 | 172 kDa protein                                               | ARHGAP35    | Rho GTPase activating protein 35          | Nucleus             | transcription regulator | 4        | 2        | 5        | 6          | 6          | 6          | 0.88  | 0.02701 |
| IPI00021076 | Isoform Long of Plakophilin-4                                 | PKP4        | plakophilin 4                             | Plasma Membrane     | other                   | 6        | 0        | 5        | 7          | 6          | 6          | 0.87  | 0.02787 |
| IPI00384689 | Hypothetical protein KIAA0251                                 | PDXDC1      | pyridoxal-dependent decarboxylase dom     | unknown             | other                   | 4        | 4        | 4        | 6          | 7          | 6          | 0.87  | 0.02787 |
| IPI00014177 | Septin-2                                                      | SEPT2       | septin 2                                  | Cytoplasm           | enzyme                  | 14       | 15       | 15       | 15         | 18         | 20         | 0.87  | 0.02810 |
| IPI00004363 | STE20/SPS1-related proline-alanine-rich protein kinase        | STK39       | serine threonine kinase 39                | Nucleus             | kinase                  | 0        | 0        | 3        | 4          | 4          | 3          | 0.87  | 0.02812 |
| IPI00148057 | Isoform 2 of Bromodomain-containing protein 8                 | BRD8        | bromodomain containing 8                  | Nucleus             | transcription regulator | 3        | 1        | 0        | 6          | 4          | 1          | 0.87  | 0.02812 |
| IPI00414127 | Ran-specific GTPase-activating protein                        | RANBP1      | RAN binding protein 1                     | Nucleus             | other                   | 2        | 2        | 1        | 3          | 4          | 4          | 0.87  | 0.02812 |
| IPI00010906 | CLN3 protein                                                  | CLN3 (inclu | ceroid-lipofuscinosis, neuronal 3         | Cytoplasm           | other                   | 0        | 3        | 7        | 0          | 0          | 3          | -0.87 | 0.02820 |
| IPI00479404 | vacuolar protein sorting 13D isoform 1                        | VPS13D      | vacuolar protein sorting 13 homolog D (S  | unknown             | other                   | 5        | 3        | 3        | 3          | 0          | 0          | -0.87 | 0.02820 |
| IPI00016405 | Hypothetical protein FUJ20455                                 | OCIAD1      | OCIA domain containing 1                  | Cytoplasm           | other                   | 6        | 8        | 6        | 4          | 4          | 5          | -0.86 | 0.02871 |
| IPI00303343 | Serine arginine-rich pre-mRNA splicing factor SR-A1           | SCAF1       | SR-related CTD-associated factor 1        | Nucleus             | other                   | 20       | 28       | 28       | 31         | 26         | 29         | 0.86  | 0.02898 |
| IPI00419433 | Isoform 1 of Rab11 family-interacting protein 1               | RAB11FIP1   | RAB11 family interacting protein 1 (class | Cytoplasm           | other                   | 14       | 17       | 15       | 21         | 18         | 16         | 0.86  | 0.02900 |
| IPI00013297 | 28 kDa heat- and acid-stable phosphoprotein                   | PDAP1       | PDGFA associated protein 1                | Cytoplasm           | other                   | 11       | 11       | 5        | 11         | 12         | 12         | 0.85  | 0.02937 |
| IPI00307591 | zinc finger protein 609                                       | ZNF609      | zinc finger protein 609                   | unknown             | other                   | 4        | 6        | 4        | 8          | 7          | 6          | 0.85  | 0.02951 |
| IPI00470596 | Isoform 1 of Zinc finger protein 638                          | ZNF638      | zinc finger protein 638                   | Nucleus             | other                   | 9        | 9        | 10       | 12         | 13         | 11         | 0.85  | 0.02969 |
| IPI00003527 | Ezrin-radixin-moesin-binding phosphoprotein 50                | SLC9A3R1    | solute carrier family 9 (sodium/hydrogen  | Plasma Membrane     | other                   | 2        | 2        | 2        | 3          | 5          | 4          | 0.84  | 0.02977 |
| IPI00005681 | PREDICTED: similar to basic leucine zipper and W2 domains 1   | BZW1        | basic leucine zipper and W2 domains 1     | Cytoplasm           | translation regulator   | 1        | 4        | 0        | 5          | 4          | 3          | 0.84  | 0.02977 |
| IPI00018240 | CDNA FLJ10498 fis, clone NT2RP2000328                         | SDA1        | SDA1 domain containing 1                  | Nucleus             | other                   | 7        | 0        | 4        | 0          | 4          | 1          | -0.84 | 0.03170 |
| IPI00410590 | Isoform 2 of Protein FAM61A                                   | LSM14A      | LSM14A, SCD6 homolog A (S. cerevisiae)    | Cytoplasm           | other                   | 18       | 16       | 18       | 26         | 16         | 19         | 0.84  | 0.03220 |
| IPI00186194 | KARP-1-binding protein                                        | CEP170      | centrosomal protein 170kDa                | Nucleus             | other                   | 5        | 5        | 5        | 6          | 10         | 6          | 0.84  | 0.03225 |
| IPI00015602 | Mitochondrial precursor proteins import receptor              | TOMM70A     | translocase of outer mitochondrial memb   | Cytoplasm           | transporter             | 12       | 13       | 15       | 9          | 14         | 9          | -0.83 | 0.03277 |
| IPI00004472 | Isoform 1 of Serine/threonine-protein kinase WNK1             | WNK1        | WNK lysine deficient protein kinase 1     | Cytoplasm           | kinase                  | 8        | 5        | 3        | 9          | 10         | 4          | 0.83  | 0.03298 |
| IPI00216952 | Isoform C of Lamin-A/C                                        | LMNA        | lamin A/C                                 | Nucleus             | other                   | 6        | 5        | 5        | 9          | 6          | 8          | 0.83  | 0.03298 |
| IPI00024650 | Monocarboxylate transporter 1                                 | SLC16A1     | solute carrier family 16, member 1 (monc  | Plasma Membrane     | transporter             | 11       | 12       | 9        | 12         | 14         | 14         | 0.83  | 0.03309 |

**Supplemental Table 1. A list of all phosphorylated proteins identified in SNU216 and SNU216-LR.**

| Accession    | Identified Proteins                                                 | Symbol   | Entrez Gene Name                             | Location            | Type(s)                 | SNU216-1 | SNU216-2 | SNU216-3 | SNU216-LR1 | SNU216-LR2 | SNU216-LR3 | STN   | p-value |
|--------------|---------------------------------------------------------------------|----------|----------------------------------------------|---------------------|-------------------------|----------|----------|----------|------------|------------|------------|-------|---------|
| IPI00646058  | 103 kDa protein                                                     | SAFB     | scaffold attachment factor B                 | Nucleus             | other                   | 7        | 12       | 13       | 16         | 12         | 12         | 0.83  | 0.03309 |
| IPI00016074  | M-phase phosphoprotein 6                                            | MPHOSPH6 | M-phase phosphoprotein 6                     | Nucleus             | other                   | 2        | 3        | 2        | 4          | 4          | 5          | 0.82  | 0.03313 |
| IPI00289649  | Tyrosine-protein phosphatase non-receptor type 3                    | PTPN3    | protein tyrosine phosphatase, non-recept     | Cytoplasm           | phosphatase             | 4        | 4        | 5        | 3          | 0          | 3          | -0.82 | 0.03350 |
| IPI00017030  | Isoform 1 of Myosin-18A                                             | MYO18A   | myosin XVIIIa                                | Cytoplasm           | other                   | 6        | 10       | 8        | 8          | 4          | 5          | -0.82 | 0.03391 |
| IPI00006103  | CD2 antigen cytoplasmic tail-binding protein 2                      | CD2BP2   | CD2 (cytoplasmic tail) binding protein 2     | Cytoplasm           | other                   | 6        | 6        | 5        | 10         | 8          | 6          | 0.82  | 0.03420 |
| IPI00005139  | Isoform 1 of Retinoblastoma-like protein 1                          | RBL1     | retinoblastoma-like 1 (p107)                 | Nucleus             | other                   | 3        | 4        | 0        | 5          | 5          | 4          | 0.81  | 0.03513 |
| IPI00016702  | Rab6 GTPase activating protein, GAPCenA                             | RABGAP1  | RAB GTPase activating protein 1              | Cytoplasm           | other                   | 4        | 0        | 3        | 5          | 3          | 6          | 0.81  | 0.03513 |
| IPI00023466  | Protein AF-17                                                       | MLLT6    | myeloid/lymphoid or mixed-lineage leuk       | Nucleus             | transcription regulator | 6        | 0        | 0        | 5          | 6          | 3          | 0.81  | 0.03513 |
| IPI00302238  | Protein AATF                                                        | AATF     | apoptosis antagonizing transcription fact    | Nucleus             | transcription regulator | 0        | 4        | 3        | 5          | 4          | 5          | 0.81  | 0.03513 |
| IPI00022145  | Nuclear ubiquitous casein and cyclin-dependent kinases substrat     | NUCKS1   | nuclear casein kinase and cyclin-depende     | Nucleus             | kinase                  | 66       | 61       | 55       | 61         | 54         | 56         | -0.80 | 0.03535 |
| IPI00185919  | Isoform 1 of La-related protein 1                                   | LARP1    | La ribonucleoprotein domain family, men      | Cytoplasm           | other                   | 45       | 37       | 42       | 44         | 39         | 31         | -0.79 | 0.03560 |
| IPI00420014  | U5 small nuclear ribonucleoprotein 200 kDa helicase                 | SNRNP200 | small nuclear ribonucleoprotein 200kDa (     | Nucleus             | enzyme                  | 6        | 7        | 6        | 8          | 8          | 10         | 0.80  | 0.03573 |
| IPI00433194  | EHBP1 protein                                                       | EHBP1    | EH domain binding protein 1                  | Cytoplasm           | other                   | 5        | 7        | 7        | 7          | 9          | 10         | 0.80  | 0.03573 |
| IPI00012462  | CDA02                                                               | EIF2A    | eukaryotic translation initiation factor 2A, | Cytoplasm           | translation regulator   | 7        | 7        | 6        | 6          | 10         | 11         | 0.79  | 0.03601 |
| IPI00008917  | Isoform 1 of Doublecortin domain-containing protein 2               | DCDC2    | doublecortin domain containing 2             | unknown             | other                   | 0        | 0        | 0        | 2          | 4          | 2          | 0.79  | 0.03611 |
| IPI00012788  | Isoform 2 of RNA polymerase I-associated factor PAF49               | CD3EAP   | CD3e molecule, epsilon associated protei     | Nucleus             | other                   | 0        | 0        | 0        | 0          | 0          | 6          | 0.79  | 0.03611 |
| IPI00016610  | Poly(rC)-binding protein 1                                          | PCBP1    | poly(rC) binding protein 1                   | Nucleus             | translation regulator   | 1        | 1        | 0        | 4          | 3          | 1          | 0.79  | 0.03611 |
| IPI00023287  | Isoform 4 of E3 ubiquitin-protein ligase NEDD4-like protein         | NEDD4L   | neural precursor cell expressed, developn    | Cytoplasm           | enzyme                  | 0        | 0        | 0        | 2          | 2          | 4          | 0.79  | 0.03611 |
| IPI00164528  | Alpha-1-syntrophin                                                  | SNTA1    | syntrophin, alpha 1 (dystrophin-associat     | Plasma Membrane     | other                   | 0        | 0        | 0        | 4          | 3          | 0          | 0.79  | 0.03611 |
| IPI00180404  | Similar to Autoantigen protein                                      | NEXN     | nexilin (F actin binding protein)            | Plasma Membrane     | other                   | 0        | 0        | 0        | 4          | 0          | 3          | 0.79  | 0.03611 |
| IPI000291638 | RB1-inducible coiled-coil protein 1                                 | RB1CC1   | RB1-inducible coiled-coil 1                  | Nucleus             | other                   | 1        | 1        | 1        | 2          | 3          | 3          | 0.79  | 0.03611 |
| IPI00297261  | Tyrosine-protein phosphatase non-receptor type 1                    | PTPN1    | protein tyrosine phosphatase, non-recept     | Cytoplasm           | phosphatase             | 1        | 1        | 0        | 3          | 2          | 3          | 0.79  | 0.03611 |
| IPI00329638  | Isoform 1 of Mitogen-activated protein kinase kinase kinase MLT ZAK | ZAK      | sterile alpha motif and leucine zipper con   | Cytoplasm           | kinase                  | 0        | 0        | 0        | 0          | 3          | 4          | 0.79  | 0.03611 |
| IPI00412993  | CDNA FLJ36874 fis, clone ASTRO2018169, weakly similar to Ooc        | PATL1    | protein associated with topoisomerase II     | unknown             | other                   | 0        | 0        | 0        | 6          | 0          | 0          | 0.79  | 0.03611 |
| IPI00746419  | IMP dehydrogenase/GMP reductase family protein                      | FRY      | furry homolog (Drosophila)                   | unknown             | other                   | 0        | 0        | 0        | 6          | 0          | 0          | 0.79  | 0.03611 |
| IPI00029011  | Kinesin family member 1B                                            | KIF1B    | kinesin family member 1B                     | Cytoplasm           | transporter             | 2        | 3        | 3        | 0          | 0          | 0          | -0.79 | 0.03656 |
| IPI00163420  | Isoform 3 of Receptor-type tyrosine-protein phosphatase alpha f     | PTPRA    | protein tyrosine phosphatase, receptor ty    | Plasma Membrane     | phosphatase             | 2        | 3        | 3        | 0          | 0          | 0          | -0.79 | 0.03656 |
| IPI00299824  | Isoform 1 of Connector enhancer of kinase suppressor of ras 1       | CNKSR1   | connector enhancer of kinase suppressor      | Cytoplasm           | other                   | 4        | 0        | 3        | 0          | 0          | 0          | -0.79 | 0.03656 |
| IPI00332106  | Pre-B-cell leukemia transcription factor interacting protein 1      | PBXIP1   | pre-B-cell leukemia homeobox interactin      | Nucleus             | transcription regulator | 2        | 3        | 3        | 0          | 0          | 0          | -0.79 | 0.03656 |
| IPI00016670  | FLJ20625 protein                                                    | LAMTOR1  | late endosomal/lysosomal adaptor, MAPK       | Plasma Membrane     | other                   | 3        | 2        | 4        | 4          | 5          | 6          | 0.79  | 0.03704 |
| IPI00383597  | Isoform A of Anion exchange protein 2                               | SLC4A2   | solute carrier family 4, anion exchanger, r  | Plasma Membrane     | transporter             | 4        | 4        | 0        | 6          | 5          | 4          | 0.79  | 0.03704 |
| IPI00182757  | Isoform 1 of Protein KIAA1967                                       | KIAA1967 |                                              | Cytoplasm           | peptidase               | 10       | 9        | 9        | 7          | 6          | 8          | -0.79 | 0.03863 |
| IPI00022970  | Nucleoprotein TPR                                                   | TPR      | translocated promoter region (to activate    | Nucleus             | other                   | 4        | 2        | 4        | 5          | 7          | 4          | 0.78  | 0.03939 |
| IPI00179890  | Isoform B of Ras-GTPase-activating protein-binding protein 2        | G3BP2    | GTPase activating protein (SH3 domain) t     | Nucleus             | enzyme                  | 16       | 18       | 19       | 14         | 15         | 16         | -0.77 | 0.03953 |
| IPI00549473  | PREDICTED: similar to Forkhead box protein K1 (Myocyte nuclear      | FOXK1    | forkhead box K1                              | Nucleus             | transcription regulator | 11       | 16       | 17       | 13         | 19         | 20         | 0.77  | 0.03962 |
| IPI00302594  | hypothetical protein LOC91748                                       | C14orf43 | chromosome 14 open reading frame 43          | Nucleus             | other                   | 7        | 10       | 6        | 9          | 11         | 10         | 0.77  | 0.03967 |
| IPI00001632  | hypothetical protein LOC57648                                       | KIAA1522 | KIAA1522                                     | unknown             | other                   | 21       | 16       | 18       | 13         | 17         | 17         | -0.76 | 0.03979 |
| IPI00186966  | Isoform IIA of Myc box-dependent-interacting protein 1              | BIN1     | bridging integrator 1                        | Nucleus             | other                   | 12       | 8        | 11       | 6          | 8          | 10         | -0.77 | 0.03979 |
| IPI00012345  | Isoform SRP55-1 of Splicing factor, arginine/serine-rich 6          | SRSF6    | serine/arginine-rich splicing factor 6       | Nucleus             | other                   | 13       | 15       | 18       | 18         | 17         | 19         | 0.77  | 0.03996 |
| IPI00182728  | Vacuolar sorting protein 4b                                         | VPS4B    | vacuolar protein sorting 4 homolog B (S.     | Cytoplasm           | transporter             | 6        | 8        | 10       | 11         | 10         | 10         | 0.77  | 0.04008 |
| IPI00103090  | Hypothetical protein LEO1                                           | LEO1     | Leo1, Paf1/RNA polymerase II complex cc      | Nucleus             | other                   | 18       | 17       | 12       | 23         | 17         | 15         | 0.76  | 0.04022 |
| IPI00003394  | Isoform SMN of Survival motor neuron protein                        |          |                                              |                     |                         | 4        | 0        | 6        | 9          | 4          | 4          | 0.76  | 0.04024 |
| IPI00159652  | PREDICTED: hypothetical protein LOC23045 isoform 1                  | FRYL     | FRY-like                                     | unknown             | other                   | 4        | 4        | 3        | 6          | 6          | 5          | 0.76  | 0.04024 |
| IPI00295502  | PREDICTED: widely-interspaced zinc finger motifs isoform 1          | WIZ      | widely interspaced zinc finger motifs        | Nucleus             | other                   | 3        | 4        | 4        | 4          | 6          | 7          | 0.76  | 0.04024 |
| IPI00386700  | ladinin 1                                                           | LAD1     | ladinin 1                                    | Extracellular Space | other                   | 8        | 9        | 8        | 11         | 9          | 12         | 0.76  | 0.04064 |
| IPI00030531  | sarcolemma associated protein                                       | SLMAP    | sarcolemma associated protein                | Plasma Membrane     | other                   | 1        | 2        | 1        | 3          | 3          | 3          | 0.76  | 0.04074 |
| IPI00043638  | Isoform 2 of La-related protein 4                                   | LARP4    | La ribonucleoprotein domain family, men      | unknown             | other                   | 2        | 0        | 1        | 5          | 3          | 0          | 0.76  | 0.04074 |
| IPI00291939  | Structural maintenance of chromosome 1-like 1 protein               | SMC1A    | structural maintenance of chromosomes        | Nucleus             | transporter             | 2        | 1        | 1        | 2          | 3          | 4          | 0.76  | 0.04074 |
| IPI00413728  | Isoform 1 of Spectrin alpha chain, brain                            | SPTAN1   | spectrin, alpha, non-erythrocytic 1 (alpha-  | Plasma Membrane     | other                   | 1        | 1        | 2        | 4          | 2          | 3          | 0.76  | 0.04074 |
| IPI00464978  | Insulin receptor substrate 2 insertion mutant (Fragment)            | IRS2     | insulin receptor substrate 2                 | Cytoplasm           | enzyme                  | 0        | 2        | 0        | 3          | 3          | 3          | 0.76  | 0.04074 |
| IPI00449906  | Isoform 1 of Rho guanine nucleotide exchange factor 7               | ARHGEF7  | Rho guanine nucleotide exchange factor       | Cytoplasm           | other                   | 4        | 0        | 4        | 0          | 2          | 1          | -0.76 | 0.04075 |
| IPI00297160  | CD44 antigen isoform 4 precursor                                    | CD44     | CD44 molecule (Indian blood group)           | Plasma Membrane     | other                   | 15       | 16       | 18       | 21         | 18         | 18         | 0.76  | 0.04114 |
| IPI00021786  | RAF proto-oncogene serine/threonine-protein kinase                  | RAF1     | v-raf-1 murine leukemia viral oncogene h     | Cytoplasm           | kinase                  | 6        | 10       | 10       | 12         | 13         | 8          | 0.75  | 0.04143 |
| IPI00170778  | Formin binding protein 4                                            | FNBP4    | formin binding protein 4                     | Nucleus             | other                   | 8        | 8        | 10       | 10         | 13         | 10         | 0.75  | 0.04143 |

**Supplemental Table 1. A list of all phosphorylated proteins identified in SNU216 and SNU216-LR.**

| Accession   | Identified Proteins                                                        | Symbol   | Entrez Gene Name                                                             | Location            | Type(s)                 | SNU216-1 | SNU216-2 | SNU216-3 | SNU216-LR1 | SNU216-LR2 | SNU216-LR3 | STN   | p-value |
|-------------|----------------------------------------------------------------------------|----------|------------------------------------------------------------------------------|---------------------|-------------------------|----------|----------|----------|------------|------------|------------|-------|---------|
| IPI00219793 | Isoform 2 of Suppressor of SWI4 1 homolog                                  | PPAN     | peter pan homolog (Drosophila)                                               | Nucleus             | other                   | 6        | 5        | 0        | 4          | 7          | 7          | 0.75  | 0.04159 |
| IPI00550506 | Isoform 1 of Rho guanine nucleotide exchange factor 16                     | ARHGEF16 | Rho guanine nucleotide exchange factor 16                                    | Cytoplasm           | other                   | 3        | 3        | 6        | 8          | 2          | 8          | 0.75  | 0.04159 |
| IPI00020060 | Sodium/hydrogen exchanger 1                                                | SLC9A1   | solute carrier family 9 (sodium/hydrogen antiporter)                         | Plasma Membrane     | ion channel             | 7        | 6        | 5        | 4          | 3          | 5          | -0.75 | 0.04241 |
| IPI00006298 | Isoform 1 of Peptidyl-prolyl cis-trans isomerase G                         | PP1G     | peptidylprolyl isomerase G (cyclophilin G)                                   | Nucleus             | enzyme                  | 12       | 13       | 10       | 12         | 9          | 7          | -0.74 | 0.04281 |
| IPI00217468 | Histone H1.5                                                               | HIST1H1B | histone cluster 1, H1b                                                       | Nucleus             | other                   | 20       | 16       | 19       | 18         | 24         | 21         | 0.74  | 0.04328 |
| IPI00170770 | PHD finger protein 3                                                       | PHF3     | PHD finger protein 3                                                         | Nucleus             | other                   | 5        | 9        | 5        | 5          | 5          | 3          | -0.74 | 0.04328 |
| IPI00023748 | Nascent polypeptide-associated complex alpha subunit                       | NACA     | nascent polypeptide-associated complex alpha subunit                         | Cytoplasm           | transcription regulator | 3        | 3        | 7        | 7          | 6          | 6          | 0.74  | 0.04331 |
| IPI00217121 | Protein C19orf21                                                           | C19orf21 | chromosome 19 open reading frame 21                                          | unknown             | other                   | 4        | 4        | 5        | 5          | 6          | 8          | 0.74  | 0.04331 |
| IPI00470779 | Alpha-taxilin                                                              | TXLNA    | taxilin alpha                                                                | Extracellular Space | cytokine                | 5        | 4        | 4        | 7          | 7          | 5          | 0.74  | 0.04331 |
| IPI00142538 | Isoform 1 of Probable helicase senataxin                                   | SETX     | senataxin                                                                    | Nucleus             | enzyme                  | 2        | 2        | 1        | 2          | 6          | 2          | 0.73  | 0.04390 |
| IPI00337335 | Isoform 1 of Myosin-14                                                     | MYH14    | myosin, heavy chain 14, non-muscle                                           | Extracellular Space | other                   | 1        | 2        | 2        | 3          | 2          | 5          | 0.73  | 0.04390 |
| IPI00007183 | Hypothetical protein ARL6IP2                                               | ATL2     | atlastin GTPase 2                                                            | Cytoplasm           | other                   | 4        | 3        | 3        | 3          | 0          | 0          | -0.73 | 0.04411 |
| IPI00025333 | Isoform 3 of Anamorsin                                                     | CIAPIN1  | cytokine induced apoptosis inhibitor 1                                       | Cytoplasm           | other                   | 3        | 4        | 3        | 0          | 3          | 0          | -0.73 | 0.04411 |
| IPI00030274 | hypothetical protein LOC84081 isoform 1                                    | NSRP1    | nuclear speckle splicing regulatory protein 1                                | Nucleus             | other                   | 3        | 2        | 5        | 3          | 0          | 0          | -0.73 | 0.04411 |
| IPI00427522 | Isoform 1 of Peroxisome proliferator-activated receptor-binding protein 1  | ERBB2IP  | erbB2 interacting protein                                                    | Extracellular Space | cytokine                | 7        | 3        | 4        | 6          | 6          | 8          | 0.73  | 0.04447 |
| IPI00438286 | Isoform 1 of LAP2 protein                                                  | ERBB2IP  | erbB2 interacting protein                                                    | Extracellular Space | cytokine                | 7        | 4        | 3        | 7          | 6          | 7          | 0.73  | 0.04447 |
| IPI00607645 | Sin3 histone deacetylase corepressor complex component SDS3                | SUDS3    | suppressor of defective silencing 3 homolog                                  | Nucleus             | other                   | 7        | 6        | 7        | 8          | 0          | 5          | -0.73 | 0.04452 |
| IPI00013830 | SNW domain-containing protein 1                                            | SNW1     | SNW domain containing 1                                                      | Nucleus             | transcription regulator | 19       | 19       | 21       | 19         | 25         | 23         | 0.73  | 0.04483 |
| IPI00031519 | Isoform 1 of DNA methyltransferase 1                                       | DNMT1    | DNA (cytosine-5-)-methyltransferase 1                                        | Nucleus             | enzyme                  | 11       | 11       | 9        | 11         | 15         | 12         | 0.73  | 0.04485 |
| IPI00329236 | Protein kinase C delta type 2                                              | PRKCD    | protein kinase C, delta                                                      | Cytoplasm           | kinase                  | 7        | 4        | 4        | 8          | 6          | 7          | 0.72  | 0.04515 |
| IPI00006038 | Isoform 1 of Nuclear pore complex protein Nup98-Nup96 precursor            | NUP98    | nucleoporin 98kDa                                                            | Nucleus             | transporter             | 10       | 12       | 11       | 15         | 11         | 14         | 0.72  | 0.04615 |
| IPI00216049 | Isoform 1 of Heterogeneous nuclear ribonucleoprotein K                     | HNRNPK   | heterogeneous nuclear ribonucleoprotein K                                    | Nucleus             | other                   | 11       | 11       | 11       | 17         | 12         | 11         | 0.72  | 0.04615 |
| IPI00030131 | thymopoietin isoform beta                                                  | TMPO     | thymopoietin                                                                 | Nucleus             | other                   | 12       | 12       | 10       | 13         | 14         | 14         | 0.72  | 0.04637 |
| IPI00292753 | GTPase activating protein and VPS9 domains 1                               | GAPVD1   | GTPase activating protein and VPS9 domains 1                                 | Cytoplasm           | other                   | 5        | 5        | 6        | 6          | 8          | 8          | 0.71  | 0.04665 |
| IPI00219526 | phosphoglucomutase 1                                                       | PGM1     | phosphoglucomutase 1                                                         | Cytoplasm           | enzyme                  | 2        | 1        | 3        | 3          | 5          | 3          | 0.71  | 0.04693 |
| IPI00064767 | nadrin isoform 1                                                           | ARHGAP17 | Rho GTPase activating protein 17                                             | Cytoplasm           | other                   | 5        | 4        | 8        | 4          | 9          | 10         | 0.70  | 0.04823 |
| IPI00029019 | Ubiquitin-associated protein 2-like                                        | UBAP2L   | ubiquitin associated protein 2-like                                          | unknown             | other                   | 13       | 12       | 12       | 15         | 13         | 16         | 0.70  | 0.04838 |
| IPI00152377 | Source of immunodominant MHC-associated peptides                           | STT3B    | STT3, subunit of the oligosaccharyltransferase                               | Cytoplasm           | enzyme                  | 12       | 14       | 12       | 15         | 15         | 15         | 0.70  | 0.04855 |
| IPI00008475 | Hydroxymethylglutaryl-CoA synthase, cytoplasmic                            | HMGCS1   | 3-hydroxy-3-methylglutaryl-CoA synthase                                      | Cytoplasm           | enzyme                  | 0        | 3        | 3        | 4          | 4          | 4          | 0.69  | 0.04938 |
| IPI00032236 | Isoform 2 of Angiomotin-like protein 2                                     | AMOTL2   | angiomotin like 2                                                            | Plasma Membrane     | other                   | 2        | 2        | 3        | 4          | 5          | 3          | 0.69  | 0.04938 |
| IPI00306301 | Pyruvate dehydrogenase E1 component alpha subunit, somatic form            | PDHA1    | pyruvate dehydrogenase (lipoamide) alpha subunit                             | Cytoplasm           | enzyme                  | 3        | 0        | 3        | 5          | 5          | 2          | 0.69  | 0.04938 |
| IPI00470461 | Hypothetical protein DKFZp686L2367                                         | ZNF462   | zinc finger protein 462                                                      | Nucleus             | other                   | 2        | 1        | 4        | 3          | 3          | 6          | 0.69  | 0.04938 |
| IPI00011857 | Chromatin assembly factor 1 subunit B                                      | CHAF1B   | chromatin assembly factor 1, subunit B (p)                                   | Nucleus             | other                   | 6        | 6        | 7        | 8          | 7          | 10         | 0.69  | 0.05034 |
| IPI00013774 | Histone deacetylase 1                                                      | HDAC1    | histone deacetylase 1                                                        | Nucleus             | transcription regulator | 14       | 15       | 12       | 13         | 17         | 18         | 0.69  | 0.05048 |
| IPI00299254 | Eukaryotic translation initiation factor 5B                                | EIF5B    | eukaryotic translation initiation factor 5B                                  | Cytoplasm           | transcription regulator | 47       | 46       | 43       | 50         | 44         | 51         | 0.69  | 0.05056 |
| IPI00234252 | SWI/SNF-related matrix-associated actin-dependent regulator of chromatin 1 | SMARCC1  | SWI/SNF related, matrix associated, actin dependent regulator of chromatin 1 | Nucleus             | transcription regulator | 18       | 14       | 12       | 18         | 17         | 16         | 0.68  | 0.05116 |
| IPI00298994 | Talin-1                                                                    | TLN1     | talin 1                                                                      | Plasma Membrane     | other                   | 2        | 3        | 3        | 4          | 4          | 5          | 0.68  | 0.05122 |
| IPI00301311 | Isoform 2 of Protein SET                                                   | SET      | SET nuclear oncogene                                                         | Nucleus             | phosphatase             | 4        | 1        | 3        | 4          | 4          | 5          | 0.68  | 0.05122 |
| IPI00644127 | Isoleucyl-tRNA synthetase, cytoplasmic                                     | IARS     | isoleucyl-tRNA synthetase                                                    | Cytoplasm           | enzyme                  | 2        | 1        | 5        | 5          | 4          | 4          | 0.68  | 0.05122 |
| IPI00002349 | FMRP interacting protein, 82kD                                             | NUFIP2   | nuclear fragile X mental retardation protein 2                               | Cytoplasm           | other                   | 19       | 17       | 20       | 19         | 17         | 13         | -0.66 | 0.05295 |
| IPI00220219 | Coatomer subunit beta'                                                     | COPB2    | coatamer protein complex, subunit beta prime                                 | Cytoplasm           | transporter             | 19       | 18       | 19       | 15         | 16         | 18         | -0.66 | 0.05295 |
| IPI00009771 | Lamin-B2                                                                   | LMNB2    | lamin B2                                                                     | Nucleus             | other                   | 2        | 2        | 5        | 3          | 5          | 6          | 0.66  | 0.05349 |
| IPI00017184 | EH-domain-containing protein 1                                             | EHD1     | EH-domain containing 1                                                       | Cytoplasm           | other                   | 3        | 3        | 3        | 3          | 5          | 6          | 0.66  | 0.05349 |
| IPI00217978 | 26 kDa protein                                                             | MED19    | mediator complex subunit 19                                                  | Nucleus             | other                   | 3        | 5        | 0        | 6          | 5          | 3          | 0.66  | 0.05349 |
| IPI00303954 | cytochrome b5 outer mitochondrial membrane precursor                       | CYB5B    | cytochrome b5 type B (outer mitochondrial membrane)                          | Cytoplasm           | enzyme                  | 4        | 2        | 3        | 6          | 4          | 4          | 0.66  | 0.05349 |
| IPI00106847 | Isoform GTBP-alt of DNA mismatch repair protein MSH6                       | MSH6     | mutS homolog 6 (E. coli)                                                     | Nucleus             | enzyme                  | 5        | 3        | 6        | 3          | 2          | 4          | -0.66 | 0.05369 |
| IPI00455500 | rapamycin-insensitive companion of mTOR                                    | RICTOR   | RPTOR independent companion of mTOR                                          | Cytoplasm           | other                   | 5        | 4        | 5        | 3          | 2          | 4          | -0.66 | 0.05369 |
| IPI00477949 | zinc finger protein 262                                                    | ZMYM4    | zinc finger, MYM-type 4                                                      | unknown             | other                   | 5        | 4        | 5        | 2          | 5          | 2          | -0.66 | 0.05369 |
| IPI00184330 | DNA replication licensing factor MCM2                                      | MCM2     | minichromosome maintenance complex component 2                               | Nucleus             | enzyme                  | 19       | 12       | 19       | 22         | 19         | 16         | 0.66  | 0.05411 |
| IPI00455518 | MORC family CW-type zinc finger 2                                          | MORC2    | MORC family CW-type zinc finger 2                                            | unknown             | other                   | 8        | 8        | 8        | 9          | 9          | 12         | 0.66  | 0.05435 |
| IPI00335634 | Isoform Beta of Paxillin                                                   | PXN      | paxillin                                                                     | Cytoplasm           | other                   | 19       | 22       | 13       | 23         | 21         | 17         | 0.65  | 0.05547 |
| IPI00030968 | Hypothetical protein C9orf142                                              | C9orf142 | chromosome 9 open reading frame 142                                          | unknown             | other                   | 4        | 2        | 4        | 5          | 5          | 5          | 0.65  | 0.05548 |
| IPI00032374 | Isoform 2 of Protein KIAA0179                                              | RRP1B    | ribosomal RNA processing 1 homolog B                                         | Nucleus             | other                   | 4        | 3        | 3        | 5          | 4          | 6          | 0.65  | 0.05548 |
| IPI00060181 | EF-hand domain-containing protein 2                                        | EFHD2    | EF-hand domain family, member D2                                             | unknown             | other                   | 3        | 4        | 3        | 3          | 5          | 7          | 0.65  | 0.05548 |

**Supplemental Table 1. A list of all phosphorylated proteins identified in SNU216 and SNU216-LR.**

| Accession   | Identified Proteins                                                                             | Symbol         | Entrez Gene Name                                                                    | Location        | Type(s)                 | SNU216-1 | SNU216-2 | SNU216-3 | SNU216-LR1 | SNU216-LR2 | SNU216-LR3 | STN   | p-value |
|-------------|-------------------------------------------------------------------------------------------------|----------------|-------------------------------------------------------------------------------------|-----------------|-------------------------|----------|----------|----------|------------|------------|------------|-------|---------|
| IPI00176903 | Isoform 1 of Polymerase I and transcript release factor                                         | PTRF           | polymerase I and transcript release factor                                          | Nucleus         | transcription regulator | 4        | 1        | 5        | 5          | 5          | 5          | 0.65  | 0.05548 |
| IPI00165970 | Isoform 1 of DGCR8 protein                                                                      | DGCR8          | DiGeorge syndrome critical region gene 8                                            | Nucleus         | enzyme                  | 3        | 6        | 6        | 3          | 3          | 4          | -0.65 | 0.05561 |
| IPI00410717 | Isoform 1 of Pogo transposable element with ZNF domain                                          | POGZ           | pogo transposable element with ZNF domain                                           | Nucleus         | enzyme                  | 5        | 5        | 5        | 4          | 0          | 5          | -0.65 | 0.05561 |
| IPI00161085 | Isoform 1 of Nucleolar protein 8                                                                | NOL8           | nucleolar protein 8                                                                 | Nucleus         | other                   | 12       | 10       | 10       | 9          | 5          | 12         | -0.65 | 0.05591 |
| IPI00013174 | Isoform 1 of RNA-binding protein 14                                                             |                |                                                                                     |                 |                         | 12       | 11       | 10       | 7          | 9          | 11         | -0.64 | 0.05710 |
| IPI00001649 | DNAJ domain-containing                                                                          | DNAJC15        | Dnaj (Hsp40) homolog, subfamily C, member 15                                        | Cytoplasm       | other                   | 0        | 0        | 0        | 0          | 0          | 5          | 0.64  | 0.05751 |
| IPI00007411 | A-kinase anchor protein 11                                                                      | AKAP11         | A kinase (PRKA) anchor protein 11                                                   | Cytoplasm       | other                   | 0        | 0        | 0        | 0          | 3          | 3          | 0.64  | 0.05751 |
| IPI00009342 | Ras GTPase-activating-like protein IQGAP1                                                       | IQGAP1         | IQ motif containing GTPase activating protein                                       | Cytoplasm       | other                   | 1        | 1        | 0        | 3          | 2          | 2          | 0.64  | 0.05751 |
| IPI00010463 | GTP binding protein 1                                                                           | GTPBP1         | GTP binding protein 1                                                               | Cytoplasm       | enzyme                  | 0        | 0        | 0        | 5          | 0          | 0          | 0.64  | 0.05751 |
| IPI00021263 | 14-3-3 protein zeta/delta                                                                       | YWHAZ          | tyrosine 3-monooxygenase/tryptophan 5-hydroxylase                                   | Cytoplasm       | enzyme                  | 1        | 1        | 1        | 3          | 2          | 2          | 0.64  | 0.05751 |
| IPI00022465 | Isoform 1 of Citron Rho-interacting kinase                                                      | CIT            | citron (rho-interacting, serine/threonine kinase)                                   | Cytoplasm       | kinase                  | 0        | 0        | 0        | 3          | 0          | 3          | 0.64  | 0.05751 |
| IPI00029745 | Nuclear factor 1 A-type                                                                         | NFIA           | nuclear factor 1A                                                                   | Nucleus         | transcription regulator | 0        | 0        | 0        | 3          | 0          | 3          | 0.64  | 0.05751 |
| IPI00031195 | Isoform 1 of Vang-like protein 1                                                                | VANGL1         | vang-like 1 (van gogh, Drosophila)                                                  | Cytoplasm       | other                   | 0        | 0        | 1        | 1          | 4          | 2          | 0.64  | 0.05751 |
| IPI00032003 | Emerin                                                                                          | EMD            | emerin                                                                              | Nucleus         | other                   | 0        | 0        | 0        | 2          | 2          | 3          | 0.64  | 0.05751 |
| IPI00163851 | Isoform 1 of Eukaryotic translation initiation factor 2-alpha kinase                            | EIF2AK4        | eukaryotic translation initiation factor 2 alpha kinase                             | Cytoplasm       | kinase                  | 0        | 1        | 1        | 2          | 3          | 2          | 0.64  | 0.05751 |
| IPI00168878 | Torsin-1A-interacting protein 2                                                                 | TOR1AIP2       | torsin A interacting protein 2                                                      | Cytoplasm       | other                   | 0        | 0        | 1        | 2          | 2          | 3          | 0.64  | 0.05751 |
| IPI00186028 | Hypothetical protein DKFZp434A112                                                               | SAP130         | Sin3A-associated protein, 130kDa                                                    | Nucleus         | transcription regulator | 0        | 0        | 0        | 0          | 2          | 4          | 0.64  | 0.05751 |
| IPI00294250 | Ephrin type-A receptor 1 precursor                                                              | EPHA1          | EPH receptor A1                                                                     | Plasma Membrane | kinase                  | 0        | 0        | 0        | 0          | 0          | 5          | 0.64  | 0.05751 |
| IPI00294391 | Cdc42 effector protein 3                                                                        | CDC42EP3       | CDC42 effector protein (Rho GTPase binding)                                         | Cytoplasm       | other                   | 0        | 0        | 0        | 2          | 0          | 4          | 0.64  | 0.05751 |
| IPI00301058 | Vasodilator-stimulated phosphoprotein                                                           | VASP           | vasodilator-stimulated phosphoprotein                                               | Plasma Membrane | other                   | 1        | 1        | 1        | 2          | 3          | 2          | 0.64  | 0.05751 |
| IPI00329142 | Glutamate-rich protein 1                                                                        | ERIC1H         | glutamate-rich 1                                                                    | unknown         | other                   | 0        | 0        | 0        | 2          | 2          | 3          | 0.64  | 0.05751 |
| IPI00744767 | SAMD4A protein                                                                                  | SAMD4A         | sterile alpha motif domain containing 4A                                            | Cytoplasm       | translation regulator   | 0        | 0        | 0        | 2          | 3          | 2          | 0.64  | 0.05751 |
| IPI00008422 | Isoform 2 of SWI/SNF-related matrix-associated actin-dependent regulator of chromatin subunit 1 | SMARCA2        | SWI/SNF-related, matrix-associated actin-dependent regulator of chromatin subunit 1 | Nucleus         | enzyme                  | 0        | 2        | 4        | 0          | 0          | 0          | -0.64 | 0.06334 |
| IPI00021363 | Jumonji/ARID domain-containing protein 1A                                                       | KDM5A          | lysine (K)-specific demethylase 5A                                                  | Nucleus         | transcription regulator | 1        | 4        | 2        | 0          | 0          | 0          | -0.64 | 0.06334 |
| IPI00289608 | Isoform 2 of AP-3 complex subunit delta-1                                                       | AP3D1          | adaptor-related protein complex 3, delta-1                                          | Cytoplasm       | transporter             | 3        | 2        | 2        | 0          | 0          | 0          | -0.64 | 0.06334 |
| IPI00554521 | Ferritin heavy chain                                                                            | FTH1           | (includes ferritin, heavy polypeptide 1)                                            | Cytoplasm       | enzyme                  | 2        | 2        | 3        | 1          | 1          | 0          | -0.64 | 0.06334 |
| IPI00740502 | PREDICTED: similar to ELG protein                                                               |                |                                                                                     |                 |                         | 3        | 2        | 2        | 0          | 0          | 0          | -0.64 | 0.06334 |
| IPI00219754 | Isoform 2 of Liprin-alpha-1                                                                     | PPFIA1         | protein tyrosine phosphatase, receptor type 11 subunit A                            | Plasma Membrane | phosphatase             | 7        | 5        | 4        | 4          | 6          | 0          | -0.64 | 0.06379 |
| IPI00301618 | Isoform 1 of Serologically defined colon cancer antigen 1                                       | NEMF           | nuclear export mediator factor                                                      | Nucleus         | other                   | 7        | 4        | 6        | 4          | 5          | 3          | -0.63 | 0.06535 |
| IPI00431127 | Isoform 1 of Cyclin-K                                                                           | CCNK           | cyclin K                                                                            | Nucleus         | other                   | 7        | 6        | 4        | 8          | 1          | 3          | -0.63 | 0.06535 |
| IPI00414315 | Isoform 1 of Epidermal growth factor receptor kinase substrate 8                                | EPS8L2         | EPS8-like 2                                                                         | unknown         | other                   | 9        | 10       | 10       | 12         | 12         | 11         | 0.63  | 0.06555 |
| IPI00010158 | Chromatin accessibility complex protein 1                                                       | CHRAC1         | chromatin accessibility complex 1                                                   | Nucleus         | enzyme                  | 3        | 3        | 6        | 7          | 4          | 6          | 0.63  | 0.06626 |
| IPI00304885 | Centromere protein C 1                                                                          | CENPC1         | centromere protein C 1                                                              | Nucleus         | other                   | 2        | 8        | 2        | 5          | 8          | 4          | 0.63  | 0.06626 |
| IPI00001780 | Ubiquitin carboxyl-terminal hydrolase 16                                                        | USP16          | ubiquitin specific peptidase 16                                                     | Cytoplasm       | peptidase               | 7        | 5        | 6        | 4          | 4          | 5          | -0.62 | 0.06646 |
| IPI00419322 | hepatoma-derived growth factor-related protein 2 isoform 1                                      | HDGFRP2        | hepatoma-derived growth factor-related protein 2                                    | Nucleus         | other                   | 12       | 15       | 12       | 16         | 9          | 8          | -0.62 | 0.06685 |
| IPI00008274 | Adenylyl cyclase-associated protein 1                                                           | CAP1           | CAP, adenylyl cyclase-associated protein                                            | Plasma Membrane | other                   | 23       | 24       | 20       | 25         | 26         | 23         | 0.62  | 0.06724 |
| IPI00411559 | Isoform 1 of Structural maintenance of chromosomes 4-like 1 protein                             | SMC4           | structural maintenance of chromosomes 4-like 1 protein                              | Nucleus         | transporter             | 9        | 9        | 14       | 12         | 12         | 14         | 0.62  | 0.06727 |
| IPI00395444 | Calmodulin regulated spectrin-associated protein 1                                              | CAMSAP1        | calmodulin regulated spectrin-associated protein                                    | unknown         | other                   | 4        | 6        | 3        | 7          | 5          | 6          | 0.62  | 0.06740 |
| IPI00004413 | Tumor necrosis factor receptor superfamily member 21 precursor                                  | TNFRSF21       | tumor necrosis factor receptor superfamily member 21 precursor                      | Plasma Membrane | other                   | 4        | 3        | 1        | 2          | 0          | 0          | -0.62 | 0.06769 |
| IPI00014537 | Calumenin precursor                                                                             | CALU           | calumenin                                                                           | Cytoplasm       | other                   | 3        | 2        | 3        | 0          | 2          | 1          | -0.62 | 0.06769 |
| IPI00016006 | Gephyrin                                                                                        | GPHN           | gephyrin                                                                            | Plasma Membrane | enzyme                  | 3        | 2        | 3        | 0          | 2          | 0          | -0.62 | 0.06769 |
| IPI00027230 | Endoplasmic precursor                                                                           | HSP90B1        | heat shock protein 90kDa beta (Grp94), class B                                      | Cytoplasm       | other                   | 3        | 3        | 2        | 1          | 2          | 1          | -0.62 | 0.06769 |
| IPI00028955 | Ribosome biogenesis protein BOP1                                                                | BOP1/LOC727222 | block of proliferation 1                                                            | Nucleus         | other                   | 2        | 3        | 3        | 2          | 0          | 0          | -0.62 | 0.06769 |
| IPI00410330 | Isoform 1 of Transcriptional repressor p66 alpha                                                | GATAD2A        | GATA zinc finger domain containing 2A                                               | Nucleus         | transcription regulator | 6        | 8        | 5        | 8          | 5          | 0          | -0.61 | 0.06812 |
| IPI00000077 | Ribonuclease H1                                                                                 | RNASEH1        | ribonuclease H1                                                                     | Nucleus         | enzyme                  | 0        | 0        | 2        | 2          | 3          | 3          | 0.62  | 0.06827 |
| IPI00243221 | Nardilysin                                                                                      | NRD1           | (includes nardilysin (N-arginine dibasic convertase))                               | Cytoplasm       | peptidase               | 1        | 2        | 1        | 5          | 1          | 2          | 0.62  | 0.06827 |
| IPI00290410 | Acidic 82 kDa protein mRNA                                                                      | DNTTIP2        | deoxynucleotidyltransferase, terminal, intergenic                                   | Nucleus         | other                   | 2        | 0        | 1        | 5          | 0          | 2          | 0.62  | 0.06827 |
| IPI00306046 | Serine/threonine-protein kinase RIO2                                                            | RIOK2          | RIO kinase 2 (yeast)                                                                | unknown         | kinase                  | 2        | 0        | 0        | 3          | 0          | 4          | 0.62  | 0.06827 |
| IPI00175146 | hypothetical protein LOC196441                                                                  | ZFC3H1         | zinc finger, C3H1-type containing                                                   | unknown         | other                   | 5        | 4        | 5        | 7          | 6          | 6          | 0.61  | 0.06919 |
| IPI00103004 | HABP4 protein                                                                                   | HABP4          | hyaluronan binding protein 4                                                        | Cytoplasm       | other                   | 8        | 7        | 6        | 5          | 6          | 5          | -0.60 | 0.06988 |
| IPI00217467 | Histone H1.4                                                                                    | HIST1H1E       | histone cluster 1, H1e                                                              | Nucleus         | other                   | 11       | 13       | 13       | 17         | 12         | 14         | 0.60  | 0.06997 |
| IPI00023780 | Isoform 2 of Dnaj homolog subfamily C member 5                                                  | DNAJC5         | Dnaj (Hsp40) homolog, subfamily C, member 5                                         | Plasma Membrane | other                   | 14       | 18       | 14       | 12         | 13         | 15         | -0.59 | 0.07002 |
| IPI00220739 | Membrane-associated progesterone receptor component 1                                           | PGRMC1         | progesterone receptor membrane component 1                                          | Plasma Membrane | transmembrane receptor  | 26       | 24       | 28       | 29         | 30         | 26         | 0.60  | 0.07043 |
| IPI00038698 | Retinoblastoma-associated protein RAP140                                                        | FAM208A        | family with sequence similarity 208, member 1                                       | unknown         | other                   | 6        | 7        | 3        | 7          | 8          | 6          | 0.60  | 0.07087 |



**Supplemental Table 1. A list of all phosphorylated proteins identified in SNU216 and SNU216-LR.**

| Accession   | Identified Proteins                                                                 | Symbol   | Entrez Gene Name                                     | Location        | Type(s)                 | SNU216-1 | SNU216-2 | SNU216-3 | SNU216-LR1 | SNU216-LR2 | SNU216-LR3 | STN   | p-value |
|-------------|-------------------------------------------------------------------------------------|----------|------------------------------------------------------|-----------------|-------------------------|----------|----------|----------|------------|------------|------------|-------|---------|
| IPI00010368 | Kinesin-like protein KIF2                                                           | KIF2A    | kinesin heavy chain member 2A                        | Cytoplasm       | other                   | 0        | 2        | 2        | 4          | 3          | 2          | 0.59  | 0.07147 |
| IPI00019835 | Isoform 1 of Bcl-2-related proline-rich protein                                     | BCL2L12  | BCL2-like 12 (proline rich)                          | unknown         | other                   | 2        | 2        | 0        | 4          | 2          | 3          | 0.59  | 0.07147 |
| IPI00028065 | Cytoplasmic protein NCK1                                                            | NCK1     | NCK adaptor protein 1                                | Cytoplasm       | kinase                  | 2        | 2        | 0        | 2          | 3          | 4          | 0.59  | 0.07147 |
| IPI00107745 | Isoform 1 of Cisplatin resistance-associated overexpressed protein                  | LUC7L3   | LUC7-like 3 (S. cerevisiae)                          | Nucleus         | other                   | 2        | 1        | 2        | 3          | 5          | 1          | 0.59  | 0.07147 |
| IPI00160348 | claspin                                                                             | CLSPN    | claspin                                              | Nucleus         | other                   | 0        | 0        | 3        | 2          | 4          | 3          | 0.59  | 0.07147 |
| IPI00329650 | Nucleoporin NUP53                                                                   | NUP35    | nucleoporin 35kDa                                    | Nucleus         | transporter             | 2        | 2        | 0        | 3          | 3          | 3          | 0.59  | 0.07147 |
| IPI00399254 | OTU domain containing 4 protein isoform 1                                           | OTUD4    | OTU domain containing 4                              | unknown         | other                   | 2        | 0        | 2        | 3          | 5          | 0          | 0.59  | 0.07147 |
| IPI00448751 | Hypothetical protein DKFZp686A0439                                                  | KIAA1598 | KIAA1598                                             | unknown         | other                   | 2        | 1        | 2        | 1          | 3          | 5          | 0.59  | 0.07147 |
| IPI00646377 | Isoform 1 of Eukaryotic translation initiation factor 4 gamma 3                     | EIF4G3   | eukaryotic translation initiation factor 4 g         | Cytoplasm       | translation regulator   | 1        | 1        | 3        | 3          | 3          | 3          | 0.59  | 0.07147 |
| IPI00011898 | Translation initiation factor eIF-2B subunit epsilon                                | EIF2B5   | eukaryotic translation initiation factor 2B,         | Cytoplasm       | translation regulator   | 2        | 2        | 5        | 2          | 2          | 0          | -0.59 | 0.07445 |
| IPI00016780 | Isoform 1 of PR domain zinc finger protein 2                                        | PRDM2    | PR domain containing 2, with ZNF domain              | Nucleus         | transcription regulator | 2        | 2        | 5        | 0          | 3          | 0          | -0.59 | 0.07445 |
| IPI00419979 | p21-activated kinase 2                                                              |          |                                                      |                 |                         | 10       | 6        | 6        | 7          | 5          | 5          | -0.59 | 0.07483 |
| IPI00409640 | LISCH protein isoform 2                                                             | LSR      | lipolysis stimulated lipoprotein receptor            | Nucleus         | transcription regulator | 21       | 16       | 15       | 16         | 14         | 16         | -0.58 | 0.07595 |
| IPI00029778 | Isoform 1 of Tumor suppressor p53-binding protein 1                                 | TP53BP1  | tumor protein p53 binding protein 1                  | Nucleus         | transcription regulator | 67       | 60       | 62       | 68         | 54         | 59         | -0.58 | 0.07627 |
| IPI00002804 | Serine/threonine-protein kinase N2                                                  | PKN2     | protein kinase N2                                    | Cytoplasm       | kinase                  | 5        | 7        | 6        | 6          | 9          | 8          | 0.58  | 0.07641 |
| IPI00337530 | Isoform 1 of RalBP1-associated Eps domain-containing protein 1                      | REPS1    | RALBP1 associated Eps domain containing              | Plasma Membrane | other                   | 9        | 6        | 3        | 11         | 6          | 6          | 0.58  | 0.07641 |
| IPI00023048 | Elongation factor 1-delta                                                           | EEF1D    | eukaryotic translation elongation factor 1           | Cytoplasm       | translation regulator   | 33       | 30       | 32       | 37         | 32         | 33         | 0.58  | 0.07684 |
| IPI00002214 | Importin alpha-2 subunit                                                            | KPNA2    | karyopherin alpha 2 (RAG cohort 1, importin alpha 2) | Nucleus         | transporter             | 2        | 2        | 2        | 2          | 5          | 3          | 0.58  | 0.07730 |
| IPI00018963 | Isoform 1 of Alpha-parvin                                                           | PARVA    | parvin, alpha                                        | Cytoplasm       | other                   | 2        | 2        | 2        | 2          | 5          | 3          | 0.58  | 0.07730 |
| IPI00253281 | Isoform 2 of Epidermal growth factor receptor kinase substrate 8                    | EPS8L1   | EPS8-like 1                                          | unknown         | other                   | 0        | 0        | 8        | 4          | 0          | 0          | -0.58 | 0.07831 |
| IPI00472675 | Nuclear pore complex protein Nup205                                                 | NUP205   | nucleoporin 205kDa                                   | Nucleus         | other                   | 3        | 4        | 3        | 3          | 2          | 1          | -0.58 | 0.07831 |
| IPI00024071 | Isoform Long of Heat shock factor protein 1                                         | HSF1     | heat shock transcription factor 1                    | Nucleus         | transcription regulator | 8        | 9        | 9        | 5          | 10         | 6          | -0.57 | 0.07953 |
| IPI00414481 | Isoform 1 of General transcription factor 3C polypeptide 1                          | GTF3C1   | general transcription factor IIIc, polypeptide 1     | Nucleus         | transcription regulator | 9        | 9        | 8        | 8          | 8          | 5          | -0.57 | 0.07953 |
| IPI00748715 | septin 9                                                                            | SEPT9    | septin 9                                             | Cytoplasm       | enzyme                  | 9        | 10       | 7        | 4          | 11         | 6          | -0.57 | 0.07953 |
| IPI00642673 | ATP-binding cassette, sub-family F (GCN20), member 1                                | ABCF1    | ATP-binding cassette, sub-family F (GCN2)            | Cytoplasm       | transporter             | 35       | 33       | 32       | 36         | 36         | 35         | 0.57  | 0.07974 |
| IPI00100980 | EH-domain-containing protein 2                                                      | EHD2     | EH-domain containing 2                               | Nucleus         | other                   | 8        | 8        | 4        | 10         | 8          | 7          | 0.57  | 0.07975 |
| IPI00180154 | Isoform 1 of Ataxin-2                                                               | ATXN2    | ataxin 2                                             | Nucleus         | other                   | 7        | 7        | 8        | 8          | 9          | 10         | 0.56  | 0.08087 |
| IPI00003373 | Occludin                                                                            | OCLN     | occludin                                             | Plasma Membrane | other                   | 4        | 0        | 2        | 3          | 5          | 3          | 0.56  | 0.08108 |
| IPI00171273 | Isoform A of Myotubularin-related protein 3                                         | MTMR3    | myotubularin related protein 3                       | Cytoplasm       | phosphatase             | 0        | 3        | 3        | 0          | 5          | 5          | 0.56  | 0.08108 |
| IPI00218323 | Tumor protein D52                                                                   | TPD52    | tumor protein D52                                    | Cytoplasm       | other                   | 2        | 3        | 2        | 3          | 4          | 4          | 0.56  | 0.08108 |
| IPI00455199 | Zuotin-related factor 1                                                             | DNAJC2   | Dnaj (Hsp40) homolog, subfamily C, member 2          | Nucleus         | other                   | 5        | 0        | 0        | 4          | 3          | 4          | 0.56  | 0.08108 |
| IPI00107104 | Chromosome X open reading frame 26                                                  | CXorf26  | chromosome X open reading frame 26                   | unknown         | other                   | 4        | 3        | 4        | 4          | 2          | 0          | -0.56 | 0.08214 |
| IPI00008490 | UNC93 homolog B1                                                                    | UNC93B1  | unc-93 homolog B1 (C. elegans)                       | Cytoplasm       | other                   | 9        | 9        | 10       | 8          | 8          | 7          | -0.56 | 0.08254 |
| IPI00456681 | Isoform 1 of Transcription elongation factor SPT6                                   | SUPT6H   | suppressor of Ty 6 homolog (S. cerevisiae)           | Nucleus         | transcription regulator | 8        | 11       | 9        | 10         | 6          | 7          | -0.56 | 0.08254 |
| IPI00743778 | 76 kDa protein                                                                      | TOR1AIP1 | torsin A interacting protein 1                       | Nucleus         | other                   | 23       | 18       | 22       | 16         | 22         | 19         | -0.55 | 0.08269 |
| IPI00022143 | Isoform 1 of Protein FAM62A                                                         | ESYT1    | extended synaptotagmin-like protein 1                | unknown         | other                   | 2        | 4        | 2        | 3          | 5          | 4          | 0.55  | 0.08429 |
| IPI00297178 | DEAD/H (Asp-Glu-Ala-Asp/His) box polypeptide 16                                     | DHX16    | DEAH (Asp-Glu-Ala-His) box polypeptide               | Nucleus         | enzyme                  | 2        | 5        | 0        | 7          | 4          | 0          | 0.55  | 0.08429 |
| IPI00479926 | Isoform 2 of Ribosomal protein S6 kinase alpha-4                                    | RPS6KA4  | ribosomal protein S6 kinase, 90kDa, polypeptide 4    | Cytoplasm       | kinase                  | 0        | 3        | 4        | 4          | 3          | 5          | 0.55  | 0.08429 |
| IPI00607554 | Isoform 1 of Ubiquitin carboxyl-terminal hydrolase 47                               | USP47    | ubiquitin specific peptidase 47                      | Cytoplasm       | peptidase               | 4        | 2        | 2        | 3          | 4          | 5          | 0.55  | 0.08429 |
| IPI00394926 | DNA polymerase delta subunit 3                                                      | POLD3    | polymerase (DNA-directed), delta 3, accessory        | Nucleus         | transcription regulator | 10       | 10       | 10       | 9          | 9          | 7          | -0.55 | 0.08557 |
| IPI00017763 | Nucleosome assembly protein 1-like 4                                                | NAP1L4   | nucleosome assembly protein 1-like 4                 | Nucleus         | other                   | 25       | 21       | 23       | 21         | 23         | 19         | -0.54 | 0.08600 |
| IPI00009544 | RalA-binding protein 1                                                              | RALBP1   | ralA binding protein 1                               | Cytoplasm       | enzyme                  | 9        | 10       | 6        | 7          | 11         | 12         | 0.55  | 0.08612 |
| IPI00376976 | Isoform 1 of 130-kDa phosphatidylinositol 4,5-bisphosphate-dependent protein kinase | ASAP1    | ArfGAP with SH3 domain, ankyrin repeat               | Plasma Membrane | other                   | 6        | 10       | 9        | 7          | 10         | 13         | 0.55  | 0.08612 |
| IPI00179700 | high mobility group AT-hook 1 isoform a                                             | HMGGA1   | high mobility group AT-hook 1                        | Nucleus         | transcription regulator | 11       | 10       | 11       | 11         | 7          | 9          | -0.54 | 0.08642 |
| IPI00216689 | Poly(rC)-binding protein 2                                                          | PCBP2    | poly(rC) binding protein 2                           | Nucleus         | other                   | 8        | 10       | 8        | 9          | 11         | 11         | 0.54  | 0.08665 |
| IPI00297211 | SWI/SNF-related matrix-associated actin-dependent regulator of transcription        | SMARCA5  | SWI/SNF related, matrix associated, actin dependent  | Nucleus         | transcription regulator | 8        | 8        | 11       | 12         | 10         | 10         | 0.54  | 0.08707 |
| IPI00375124 | Ubiquitin carboxyl-terminal hydrolase 42                                            |          |                                                      |                 |                         | 3        | 3        | 3        | 5          | 4          | 4          | 0.54  | 0.08757 |
| IPI00001707 | Isoform 1 of Bromodomain-containing protein 7                                       | BRD7     | bromodomain containing 7                             | Nucleus         | transcription regulator | 5        | 5        | 3        | 0          | 4          | 4          | -0.54 | 0.08853 |
| IPI00003964 | ubiquitin specific protease 9, X-linked isoform 4                                   | USP9X    | ubiquitin specific peptidase 9, X-linked             | Plasma Membrane | peptidase               | 3        | 5        | 5        | 4          | 2          | 3          | -0.54 | 0.08853 |
| IPI00103867 | Isoform 1 of Rififylin                                                              | RFFL     | ring finger and FYVE-like domain containing          | Cytoplasm       | enzyme                  | 4        | 4        | 5        | 3          | 4          | 2          | -0.54 | 0.08853 |
| IPI00032342 | Thyroid receptor-interacting protein 12                                             | TRIP12   | thyroid hormone receptor interactor 12               | Cytoplasm       | enzyme                  | 7        | 10       | 12       | 13         | 10         | 11         | 0.53  | 0.09020 |
| IPI00425560 | Isoform 1 of LAP4 protein                                                           | SCRIB    | scribbled homolog (Drosophila)                       | Cytoplasm       | other                   | 23       | 23       | 25       | 26         | 23         | 28         | 0.53  | 0.09039 |
| IPI00031960 | polymerase (RNA) I polypeptide A, 194kDa                                            | POLR1A   | polymerase (RNA) I polypeptide A, 194kDa             | Nucleus         | enzyme                  | 5        | 3        | 6        | 4          | 1          | 5          | -0.53 | 0.09067 |
| IPI00011593 | Fos-related antigen 2                                                               | FOSL2    | FOS-like antigen 2                                   | Nucleus         | transcription regulator | 3        | 3        | 4        | 7          | 3          | 4          | 0.53  | 0.09086 |

**Supplemental Table 1. A list of all phosphorylated proteins identified in SNU216 and SNU216-LR.**

| Accession   | Identified Proteins                                                 | Symbol   | Entrez Gene Name                                | Location        | Type(s)                 | SNU216-1 | SNU216-2 | SNU216-3 | SNU216-LR1 | SNU216-LR2 | SNU216-LR3 | STN   | p-value |
|-------------|---------------------------------------------------------------------|----------|-------------------------------------------------|-----------------|-------------------------|----------|----------|----------|------------|------------|------------|-------|---------|
| IPI00027157 | CENP-F kinetochore protein                                          | CENPF    | centromere protein F, 350/400kDa (mitos         | Nucleus         | other                   | 2        | 4        | 4        | 3          | 4          | 7          | 0.53  | 0.09086 |
| IPI00215948 | Isoform 1 of Alpha-1 catenin                                        | CTNNA1   | catenin (cadherin-associated protein), alp1     | Plasma Membrane | other                   | 27       | 27       | 30       | 29         | 24         | 25         | -0.52 | 0.09143 |
| IPI00013214 | DNA replication licensing factor MCM3                               | MCM3     | minichromosome maintenance complex c            | Nucleus         | enzyme                  | 31       | 29       | 25       | 29         | 20         | 30         | -0.52 | 0.09159 |
| IPI00013891 | Isoform Long of Transformer-2 protein homolog                       | TRA2A    | transformer 2 alpha homolog (Drosophila)        | Nucleus         | other                   | 9        | 8        | 15       | 14         | 13         | 10         | 0.52  | 0.09216 |
| IPI00027378 | UBA/UBX 33.3 kDa protein                                            | UBXN1    | UBX domain protein 1                            | Cytoplasm       | other                   | 4        | 3        | 4        | 4          | 5          | 6          | 0.52  | 0.09272 |
| IPI00217975 | Lamin-B1                                                            | LMNB1    | lamin B1                                        | Nucleus         | other                   | 3        | 4        | 4        | 6          | 5          | 4          | 0.52  | 0.09272 |
| IPI00304409 | Calcium-regulated heat stable protein 1                             | CARHSP1  | calcium regulated heat stable protein 1, 2      | Cytoplasm       | other                   | 4        | 6        | 5        | 4          | 4          | 3          | -0.52 | 0.09323 |
| IPI00219726 | Isoform 2AC of Catenin delta-1                                      | CTNND1   | catenin (cadherin-associated protein), del1     | Nucleus         | other                   | 13       | 12       | 10       | 15         | 14         | 11         | 0.51  | 0.09452 |
| IPI00004344 | Isoform 1 of AF4/FMR2 family member 4                               | AFF4     | AF4/FMR2 family, member 4                       | Nucleus         | transcription regulator | 3        | 4        | 5        | 4          | 6          | 6          | 0.51  | 0.09479 |
| IPI00045856 | CDNA FLJ14717 fis, clone NT2RP3001239, moderately similar to        |          |                                                 |                 |                         | 3        | 4        | 5        | 3          | 5          | 8          | 0.51  | 0.09479 |
| IPI00219798 | Isoform 1 of Roundabout homolog 1 precursor                         | ROBO1    | roundabout, axon guidance receptor, hon         | Plasma Membrane | transmembrane receptor  | 5        | 6        | 5        | 3          | 5          | 4          | -0.51 | 0.09575 |
| IPI00464952 | Splicing factor arginine/serine-rich 11                             | SRSF11   | serine/arginine-rich splicing factor 11         | Nucleus         | other                   | 13       | 15       | 9        | 13         | 17         | 12         | 0.51  | 0.09709 |
| IPI00015952 | Eukaryotic translation initiation factor 4 gamma 2                  | EIF4G2   | eukaryotic translation initiation factor 4 g    | Cytoplasm       | translation regulator   | 13       | 13       | 12       | 15         | 16         | 12         | 0.50  | 0.09732 |
| IPI00054042 | Isoform 1 of General transcription factor II-I                      | GTF2I    | general transcription factor Iii                | Nucleus         | transcription regulator | 4        | 5        | 4        | 3          | 8          | 6          | 0.50  | 0.09753 |
| IPI00383396 | Isoform 1 of Autophagy-related protein 9A                           | ATG9A    | ATG9 autophagy related 9 homolog A (S.          | Cytoplasm       | other                   | 4        | 6        | 4        | 7          | 6          | 5          | 0.49  | 0.09891 |
| IPI00289344 | Isoform 1 of Nuclear receptor corepressor 1                         | NCOR1    | nuclear receptor corepressor 1                  | Nucleus         | transcription regulator | 15       | 13       | 14       | 16         | 16         | 15         | 0.49  | 0.10016 |
| IPI00002806 | Isoform TAFII20 of Transcription initiation factor TFIID subunit 12 | TAF12    | (includ TAF12 RNA polymerase II, TATA box bind  | Nucleus         | transcription regulator | 0        | 0        | 0        | 3          | 2          | 0          | 0.49  | 0.10030 |
| IPI00005011 | Isoform 1 of CCR4-NOT transcription complex subunit 2               | CNOT2    | CCR4-NOT transcription complex, subunit         | Nucleus         | transcription regulator | 0        | 0        | 0        | 3          | 2          | 0          | 0.49  | 0.10030 |
| IPI00012318 | PREDICTED: mitogen-activated protein kinase kinase kinase 1         |          |                                                 |                 |                         | 0        | 0        | 0        | 0          | 2          | 3          | 0.49  | 0.10030 |
| IPI00013444 | Zinc finger protein 40                                              | HIVEP1   | human immunodeficiency virus type I en1         | Nucleus         | transcription regulator | 0        | 0        | 1        | 2          | 2          | 2          | 0.49  | 0.10030 |
| IPI00014893 | Isoform 2 of Nuclear distribution protein nudE homolog 1            | NDE1     | (includ nudE nuclear distribution gene E homolo | Nucleus         | other                   | 0        | 0        | 0        | 3          | 1          | 2          | 0.49  | 0.10030 |
| IPI00018321 | Isoform 1 of Histone-lysine N-methyltransferase, H3 lysine-9 spe    | SETDB1   | SET domain, bifurcated 1                        | Nucleus         | enzyme                  | 0        | 0        | 0        | 2          | 3          | 0          | 0.49  | 0.10030 |
| IPI00027152 | Centromere protein A                                                | CENPA    | centromere protein A                            | Nucleus         | other                   | 0        | 0        | 0        | 2          | 2          | 2          | 0.49  | 0.10030 |
| IPI00027248 | Tumor suppressor candidate 2                                        | TUSC2    | tumor suppressor candidate 2                    | Nucleus         | other                   | 0        | 0        | 0        | 0          | 3          | 2          | 0.49  | 0.10030 |
| IPI00064666 | Protein FAM84B                                                      | FAM84B   | family with sequence similarity 84, memb        | Plasma Membrane | other                   | 0        | 0        | 0        | 4          | 0          | 0          | 0.49  | 0.10030 |
| IPI00152093 | Isoform 3 of Periphilin-1                                           | PPHLN1   | Periphilin 1                                    | Nucleus         | other                   | 0        | 0        | 0        | 4          | 0          | 0          | 0.49  | 0.10030 |
| IPI00154590 | MKI67 FHA domain-interacting nucleolar phosphoprotein               | MKI67IP  | MKI67 (FHA domain) interacting nucleola         | Nucleus         | other                   | 0        | 0        | 0        | 2          | 3          | 0          | 0.49  | 0.10030 |
| IPI00170865 | Membrane-associated guanylate kinase-related 3                      | MAGI3    | membrane associated guanylate kinase, V         | Cytoplasm       | kinase                  | 0        | 0        | 0        | 4          | 0          | 0          | 0.49  | 0.10030 |
| IPI00173946 | TPR domain, ankyrin-repeat and coiled-coil-containing               | TANC1    | tetratricopeptide repeat, ankyrin repeat a      | Plasma Membrane | other                   | 0        | 0        | 0        | 0          | 3          | 2          | 0.49  | 0.10030 |
| IPI00183699 | Isoform 2 of HMG box transcription factor BBX                       | BBX      | bobby sox homolog (Drosophila)                  | Nucleus         | other                   | 0        | 0        | 0        | 4          | 0          | 0          | 0.49  | 0.10030 |
| IPI00295425 | BC282485_1                                                          | CCDC61   | coiled-coil domain containing 61                | Cytoplasm       | other                   | 0        | 0        | 0        | 0          | 3          | 2          | 0.49  | 0.10030 |
| IPI00296992 | AXL receptor tyrosine kinase isoform 1                              | AXL      | AXL receptor tyrosine kinase                    | Plasma Membrane | kinase                  | 0        | 0        | 0        | 2          | 3          | 0          | 0.49  | 0.10030 |
| IPI00297655 | Neurogenic locus notch homolog protein 2 precursor                  | NOTCH2   | notch 2                                         | Plasma Membrane | transcription regulator | 0        | 0        | 0        | 0          | 2          | 3          | 0.49  | 0.10030 |
| IPI00297982 | Eukaryotic translation initiation factor 2 subunit 3                | EIF2S3   | eukaryotic translation initiation factor 2, s   | Cytoplasm       | translation regulator   | 0        | 0        | 0        | 3          | 1          | 2          | 0.49  | 0.10030 |
| IPI00375220 | Isoform 1 of Nance-Horan syndrome protein                           | NHS      | Nance-Horan syndrome (congenital catar.         | Nucleus         | other                   | 0        | 0        | 0        | 2          | 2          | 2          | 0.49  | 0.10030 |
| IPI00384765 | Membrane-associated tyrosine- and threonine-specific cdc2-inhib     | PKMYT1   | protein kinase, membrane associated tyrc        | Cytoplasm       | kinase                  | 0        | 0        | 0        | 2          | 2          | 2          | 0.49  | 0.10030 |
| IPI00385001 | Hypothetical protein DKFZp686L1653 (Fragment)                       | NUP188   | (includ nucleoporin 188kDa                      | Nucleus         | other                   | 0        | 0        | 0        | 4          | 0          | 0          | 0.49  | 0.10030 |
| IPI00387144 | Tubulin alpha-ubiquitous chain                                      | TUBA1C   | tubulin, alpha 1c                               | Cytoplasm       | other                   | 1        | 1        | 1        | 2          | 2          | 2          | 0.49  | 0.10030 |
| IPI00400873 | Chromosome 10 open reading frame 18                                 |          |                                                 |                 |                         | 0        | 0        | 0        | 4          | 0          | 0          | 0.49  | 0.10030 |
| IPI00431025 | abl-interactor 1 isoform a                                          | ABI1     | abl-interactor 1                                | Cytoplasm       | other                   | 0        | 0        | 0        | 4          | 0          | 0          | 0.49  | 0.10030 |
| IPI00444793 | Centrosome and spindle pole associated protein 1                    | CSPP1    | centrosome and spindle pole associated          | Cytoplasm       | other                   | 0        | 0        | 0        | 4          | 0          | 0          | 0.49  | 0.10030 |
| IPI00455806 | paternally expressed 10 isoform RF1                                 | PEG10    | paternally expressed 10                         | Nucleus         | other                   | 0        | 0        | 0        | 2          | 0          | 3          | 0.49  | 0.10030 |
| IPI00465087 | Ubiquitin carboxyl-terminal hydrolase BAP1                          | BAP1     | BRCA1 associated protein-1 (ubiquitin car       | Nucleus         | peptidase               | 0        | 0        | 0        | 3          | 0          | 2          | 0.49  | 0.10030 |
| IPI00555838 | Isoform 1 of Serine/threonine-protein kinase MARK2                  | MARK2    | MAP/microtubule affinity-regulating kinas       | Cytoplasm       | kinase                  | 1        | 0        | 1        | 4          | 0          | 0          | 0.49  | 0.10030 |
| IPI00746320 | 3-phosphoinositide dependent protein kinase-1 variant (Fragmen      | PDPK1    | 3-phosphoinositide dependent protein kii        | Cytoplasm       | kinase                  | 0        | 0        | 0        | 0          | 4          | 0          | 0.49  | 0.10030 |
| IPI00017227 | Ubiquitin domain containing 1 variant                               | UBTD1    | ubiquitin domain containing 1                   | unknown         | other                   | 2        | 3        | 0        | 0          | 0          | 0          | -0.49 | 0.10582 |
| IPI00021320 | Bin3, bicoid-interacting 3                                          | MEPCE    | methylphosphate capping enzyme                  | unknown         | enzyme                  | 4        | 0        | 0        | 0          | 0          | 0          | -0.49 | 0.10582 |
| IPI00156793 | DNA-repair protein complementing XP-C cells                         | XPC      | xeroderma pigmentosum, complementati            | Nucleus         | other                   | 0        | 3        | 2        | 1          | 0          | 0          | -0.49 | 0.10582 |
| IPI00215805 | Exocyst complex component 2                                         | EXOC2    | exocyst complex component 2                     | Cytoplasm       | transporter             | 0        | 4        | 0        | 0          | 0          | 0          | -0.49 | 0.10582 |
| IPI00216308 | Voltage-dependent anion-selective channel protein 1                 | VDAC1    | voltage-dependent anion channel 1               | Cytoplasm       | ion channel             | 2        | 2        | 2        | 1          | 1          | 1          | -0.49 | 0.10582 |
| IPI00217686 | Putative rRNA methyltransferase 3                                   | FTSJ3    | FtsJ homolog 3 (E. coli)                        | Nucleus         | enzyme                  | 1        | 1        | 4        | 1          | 0          | 0          | -0.49 | 0.10582 |
| IPI00218823 | Isoform 1 of Myeloid/lymphoid or mixed-lineage leukemia prote       | MLL4     | myeloid/lymphoid or mixed-lineage leuk          | Nucleus         | transcription regulator | 0        | 2        | 3        | 0          | 0          | 0          | -0.49 | 0.10582 |
| IPI00246827 | Isoform 1 of Protein C17orf28                                       | C17orf28 | chromosome 17 open reading frame 28             | Plasma Membrane | other                   | 0        | 4        | 0        | 0          | 0          | 0          | -0.49 | 0.10582 |
| IPI00249080 | Isoform 2 of N-acetylserotonin O-methyltransferase-like protein     | ASMTL    | acetylserotonin O-methyltransferase-like        | Cytoplasm       | enzyme                  | 2        | 2        | 2        | 0          | 0          | 0          | -0.49 | 0.10582 |

**Supplemental Table 1. A list of all phosphorylated proteins identified in SNU216 and SNU216-LR.**

| Accession   | Identified Proteins                                                      | Symbol   | Entrez Gene Name                                    | Location            | Type(s)                 | SNU216-1 | SNU216-2 | SNU216-3 | SNU216-LR1 | SNU216-LR2 | SNU216-LR3 | STN   | p-value |
|-------------|--------------------------------------------------------------------------|----------|-----------------------------------------------------|---------------------|-------------------------|----------|----------|----------|------------|------------|------------|-------|---------|
| IPI00291376 | Putative RNA methyltransferase NCOA6IP                                   | TGS1     | trimethylguanosine synthase 1                       | Nucleus             | enzyme                  | 0        | 0        | 4        | 0          | 0          | 0          | -0.49 | 0.10582 |
| IPI00299526 | Polycomb protein SUZ12                                                   | SUZ12    | suppressor of zeste 12 homolog (Drosophila)         | Nucleus             | enzyme                  | 3        | 0        | 2        | 0          | 0          | 1          | -0.49 | 0.10582 |
| IPI00337641 | Isoform 1 of Tetratricopeptide repeat protein 7B                         | TTC7B    | tetratricopeptide repeat domain 7B                  | unknown             | other                   | 3        | 2        | 0        | 1          | 0          | 0          | -0.49 | 0.10582 |
| IPI00420025 | SVH-B                                                                    | ARMC10   | armadillo repeat containing 10                      | Cytoplasm           | other                   | 2        | 2        | 2        | 0          | 0          | 0          | -0.49 | 0.10582 |
| IPI00431262 | Isoform 1 of Protein KIAA0195                                            | KIAA0195 | KIAA0195                                            | unknown             | other                   | 3        | 0        | 2        | 0          | 0          | 0          | -0.49 | 0.10582 |
| IPI00006211 | VAMP-associated protein B/C                                              | VAPB     | VAMP (vesicle-associated membrane protein)          | Plasma Membrane     | other                   | 6        | 5        | 4        | 7          | 6          | 6          | 0.49  | 0.10655 |
| IPI00008283 | Zinc finger protein 106 homolog                                          | ZFP106   | zinc finger protein 106 homolog (mouse)             | Cytoplasm           | other                   | 6        | 6        | 6        | 6          | 6          | 7          | 0.49  | 0.10655 |
| IPI00008531 | REST corepressor 1                                                       | RCOR1    | REST corepressor 1                                  | Nucleus             | transcription regulator | 5        | 3        | 7        | 6          | 7          | 6          | 0.49  | 0.10655 |
| IPI00220901 | TBC1 domain family, member 4                                             | TBC1D4   | TBC1 domain family, member 4                        | Cytoplasm           | other                   | 7        | 7        | 0        | 7          | 6          | 6          | 0.49  | 0.10655 |
| IPI00301844 | Zinc finger and homeobox protein 3                                       | ZHX3     | zinc fingers and homeoboxes 3                       | Nucleus             | transcription regulator | 6        | 8        | 0        | 6          | 7          | 6          | 0.49  | 0.10655 |
| IPI00217541 | ATP-dependent RNA helicase DDX51                                         | DDX51    | DEAD (Asp-Glu-Ala-Asp) box polypeptide              | unknown             | enzyme                  | 4        | 6        | 9        | 7          | 4          | 4          | -0.49 | 0.10707 |
| IPI00373869 | Homeodomain-like containing protein                                      | C17orf49 | chromosome 17 open reading frame 49                 | Nucleus             | other                   | 6        | 7        | 6        | 4          | 5          | 6          | -0.49 | 0.10707 |
| IPI00301503 | Isoform 1 of Arginine/serine-rich splicing factor 10                     | TRA2B    | transformer 2 beta homolog (Drosophila)             | Nucleus             | other                   | 19       | 12       | 14       | 13         | 20         | 17         | 0.49  | 0.10769 |
| IPI00083708 | HBxAg transactivated protein 2                                           | PRRC2C   | proline-rich coiled-coil 2C                         | Cytoplasm           | other                   | 4        | 8        | 4        | 8          | 8          | 4          | 0.48  | 0.10812 |
| IPI00166487 | Isoform 3 of Protein KIAA0310                                            | SEC16A   | SEC16 homolog A (S. cerevisiae)                     | Cytoplasm           | phosphatase             | 5        | 5        | 6        | 6          | 7          | 7          | 0.48  | 0.10812 |
| IPI00305020 | SH2 domain-containing protein 3A                                         | SH2D3A   | SH2 domain containing 3A                            | Cytoplasm           | other                   | 6        | 5        | 5        | 10         | 5          | 5          | 0.48  | 0.10812 |
| IPI00456631 | Isoform 1 of Lysine-specific histone demethylase 1                       | KDM1A    | lysine (K)-specific demethylase 1A                  | Nucleus             | enzyme                  | 5        | 4        | 7        | 6          | 6          | 8          | 0.48  | 0.10812 |
| IPI00166512 | stromal interaction molecule 1 precursor                                 | STIM1    | stromal interaction molecule 1                      | Plasma Membrane     | other                   | 20       | 16       | 18       | 16         | 16         | 17         | -0.48 | 0.10904 |
| IPI00549521 | Isoform 1 of Choline transporter-like protein 2                          | SLC44A2  | solute carrier family 44, member 2                  | Extracellular Space | transporter             | 7        | 6        | 5        | 6          | 8          | 8          | 0.47  | 0.11078 |
| IPI00006865 | Vesicle trafficking protein SEC22b                                       | SEC22B   | SEC22 vesicle trafficking protein homolog           | Cytoplasm           | other                   | 1        | 2        | 1        | 2          | 3          | 2          | 0.47  | 0.11186 |
| IPI00010833 | Zinc finger protein 148                                                  | ZNF148   | zinc finger protein 148                             | Nucleus             | transcription regulator | 0        | 2        | 0        | 0          | 3          | 2          | 0.47  | 0.11186 |
| IPI00013272 | Isoform 1 of Golgin subfamily A member 4                                 | GOLGA4   | golgin A4                                           | Cytoplasm           | other                   | 2        | 1        | 1        | 1          | 3          | 3          | 0.47  | 0.11186 |
| IPI00164434 | Isoform 1 of Receptor expression-enhancing protein 3                     | REEP3    | receptor accessory protein 3                        | unknown             | other                   | 2        | 0        | 0        | 5          | 0          | 0          | 0.47  | 0.11186 |
| IPI00335437 | CDNA FLJ13144 fis, clone NT2RP3003278                                    | ANKZF1   | ankyrin repeat and zinc finger domain               | Nucleus             | transcription regulator | 2        | 0        | 0        | 0          | 3          | 3          | 0.47  | 0.11186 |
| IPI00374054 | Isoform 2 of Protein enabled homolog                                     | ENAH     | enabled homolog (Drosophila)                        | Plasma Membrane     | other                   | 2        | 1        | 0        | 2          | 3          | 2          | 0.47  | 0.11186 |
| IPI00029730 | Syntaxin-4                                                               | STX4     | syntaxin 4                                          | Plasma Membrane     | transporter             | 3        | 3        | 0        | 1          | 2          | 0          | -0.47 | 0.11288 |
| IPI00170934 | LKB1 interacting protein                                                 | STK11IP  | serine/threonine kinase 11 interacting protein      | Cytoplasm           | other                   | 2        | 1        | 4        | 0          | 1          | 2          | -0.47 | 0.11288 |
| IPI00179326 | Insulin receptor tyrosine kinase substrate                               | BAIAP2L1 | BAI1-associated protein 2-like 1                    | Cytoplasm           | other                   | 2        | 4        | 0        | 0          | 2          | 1          | -0.47 | 0.11288 |
| IPI00290272 | DNA polymerase alpha subunit B                                           | POLA2    | polymerase (DNA directed), alpha 2 (70kD)           | Nucleus             | enzyme                  | 3        | 3        | 1        | 2          | 0          | 0          | -0.47 | 0.11288 |
| IPI00294728 | Protein Dmx-like 1                                                       | DMXL1    | Dmx-like 1                                          | unknown             | other                   | 2        | 2        | 3        | 2          | 0          | 1          | -0.47 | 0.11288 |
| IPI00298738 | DNA-directed RNA polymerase, mitochondrial precursor                     | POLRMT   | polymerase (RNA) mitochondrial (DNA directed)       | Cytoplasm           | enzyme                  | 3        | 0        | 3        | 0          | 0          | 2          | -0.47 | 0.11288 |
| IPI00007675 | Cytoplasmic dynein 1 light intermediate chain 1                          | DYNC1L1  | dynein, cytoplasmic 1, light intermediate chain     | Cytoplasm           | other                   | 6        | 7        | 6        | 6          | 8          | 9          | 0.46  | 0.11359 |
| IPI00024167 | ABT1-associated protein                                                  | ESF1     | ESF1, nucleolar pre-rRNA processing protein         | Nucleus             | other                   | 5        | 6        | 8        | 5          | 8          | 10         | 0.46  | 0.11359 |
| IPI00384541 | Novel protein                                                            | RPRD2    | regulation of nuclear pre-mRNA domain               | unknown             | other                   | 6        | 10       | 7        | 6          | 8          | 5          | -0.46 | 0.11369 |
| IPI00456744 | Isoform 1 of SH3 domain-binding protein 1                                | SH3BP1   | SH3-domain binding protein 1                        | unknown             | other                   | 8        | 4        | 11       | 4          | 8          | 7          | -0.46 | 0.11369 |
| IPI00010700 | Isoform 1 of Large proline-rich protein BAT2                             | PRRC2A   | proline-rich coiled-coil 2A                         | Cytoplasm           | other                   | 20       | 19       | 22       | 18         | 18         | 20         | -0.46 | 0.11370 |
| IPI00009326 | 65 kDa Yes-associated protein                                            | YAP1     | Yes-associated protein 1                            | Nucleus             | transcription regulator | 16       | 22       | 20       | 20         | 20         | 23         | 0.46  | 0.11421 |
| IPI00029822 | SMARCA4 isoform 2                                                        | SMARCA4  | SWI/SNF related, matrix associated, actin dependent | Nucleus             | transcription regulator | 6        | 7        | 11       | 7          | 3          | 10         | -0.46 | 0.11486 |
| IPI00152510 | ATP-dependent RNA helicase DDX54                                         | DDX54    | DEAD (Asp-Glu-Ala-Asp) box polypeptide              | Nucleus             | transcription regulator | 9        | 9        | 6        | 8          | 6          | 6          | -0.46 | 0.11486 |
| IPI00000634 | Coiled-coil domain-containing protein 6                                  | CCDC6    | coiled-coil domain containing 6                     | Cytoplasm           | other                   | 7        | 8        | 6        | 9          | 8          | 8          | 0.45  | 0.11545 |
| IPI00012268 | 26S proteasome non-ATPase regulatory subunit 2                           | PSMD2    | proteasome (prosome, macropain) 26S subunit         | Cytoplasm           | other                   | 5        | 7        | 9        | 8          | 9          | 8          | 0.45  | 0.11545 |
| IPI00010951 | Epiplakin                                                                | EPPK1    | epiplakin 1                                         | Cytoplasm           | other                   | 2        | 2        | 1        | 2          | 3          | 3          | 0.45  | 0.11635 |
| IPI00025039 | Fibrillarin                                                              | FBL      | fibrillarin                                         | Nucleus             | other                   | 2        | 0        | 2        | 2          | 3          | 3          | 0.45  | 0.11635 |
| IPI00026307 | Pre-mRNA-splicing factor PRP17                                           | CDC40    | cell division cycle 40 homolog (S. cerevisiae)      | Nucleus             | other                   | 0        | 2        | 2        | 2          | 4          | 2          | 0.45  | 0.11635 |
| IPI00026320 | Ubiquitin-protein ligase EDD1                                            | UBR5     | ubiquitin protein ligase E3 component n-1           | Nucleus             | enzyme                  | 1        | 2        | 2        | 2          | 4          | 2          | 0.45  | 0.11635 |
| IPI00164672 | mRNA decapping enzyme 1A                                                 | DCP1A    | DCP1 decapping enzyme homolog A (S. cerevisiae)     | Nucleus             | other                   | 3        | 0        | 5        | 2          | 0          | 0          | 0.45  | 0.11635 |
| IPI00291032 | spectrin domain with coiled-coils 1 NSP5b3b                              | SPECC1   | sperm antigen with calponin homology domain         | Nucleus             | other                   | 1        | 2        | 2        | 2          | 3          | 3          | 0.45  | 0.11635 |
| IPI00299571 | CDNA FLJ45525 fis, clone BRTHA2026311, highly similar to Protein C9orf82 | PDIA6    | protein disulfide isomerase family A, member 6      | Cytoplasm           | enzyme                  | 0        | 0        | 3        | 5          | 0          | 2          | 0.45  | 0.11635 |
| IPI00303812 | Protein C9orf82                                                          | C9orf82  | chromosome 9 open reading frame 82                  | unknown             | other                   | 3        | 0        | 0        | 4          | 0          | 3          | 0.45  | 0.11635 |
| IPI00375441 | far upstream element-binding protein                                     | FUBP1    | far upstream element (FUSE) binding protein         | Nucleus             | transcription regulator | 2        | 2        | 1        | 3          | 1          | 4          | 0.45  | 0.11635 |
| IPI00644079 | heterogeneous nuclear ribonucleoprotein U isoform a                      | HNRNPU   | heterogeneous nuclear ribonucleoprotein U           | Nucleus             | transporter             | 1        | 1        | 3        | 2          | 2          | 4          | 0.45  | 0.11635 |
| IPI00028077 | Isoform 1 of Presenilin-1                                                | PSEN1    | presenilin 1                                        | Plasma Membrane     | peptidase               | 6        | 0        | 0        | 3          | 0          | 0          | -0.45 | 0.11777 |
| IPI00154515 | Smad nuclear-interacting protein 1                                       | SNIP1    | Smad nuclear interacting protein 1                  | Nucleus             | other                   | 6        | 7        | 9        | 7          | 9          | 10         | 0.45  | 0.11817 |
| IPI00100453 | DENN domain containing protein                                           | DENND4C  | DENN/MADD domain containing 4C                      | unknown             | other                   | 9        | 8        | 6        | 7          | 10         | 10         | 0.45  | 0.11910 |

**Supplemental Table 1. A list of all phosphorylated proteins identified in SNU216 and SNU216-LR.**

| Accession   | Identified Proteins                                                                           | Symbol   | Entrez Gene Name                                                                                | Location        | Type(s)                 | SNU216-1 | SNU216-2 | SNU216-3 | SNU216-LR1 | SNU216-LR2 | SNU216-LR3 | STN   | p-value |
|-------------|-----------------------------------------------------------------------------------------------|----------|-------------------------------------------------------------------------------------------------|-----------------|-------------------------|----------|----------|----------|------------|------------|------------|-------|---------|
| IPI00172474 | Isoform 2 of Zinc finger protein 91 homolog                                                   | ZFP91    | zinc finger protein 91 homolog (mouse)                                                          | Nucleus         | transcription regulator | 8        | 8        | 7        | 9          | 10         | 8          | 0.45  | 0.11910 |
| IPI00216348 | Isoform 2C of Cytoplasmic dynein 1 intermediate chain 2                                       | DYN112   | dynein, cytoplasmic 1, intermediate chain                                                       | Cytoplasm       | other                   | 8        | 6        | 9        | 11         | 7          | 9          | 0.45  | 0.11910 |
| IPI00256861 | Isoform 2 of Microtubule-actin crosslinking factor 1, isoforms 1/2                            | MACF1    | microtubule-actin crosslinking factor 1                                                         | Cytoplasm       | enzyme                  | 7        | 9        | 7        | 9          | 9          | 9          | 0.45  | 0.11910 |
| IPI00333215 | Isoform 1 of Transcription elongation factor A protein 1                                      | TCEA1    | transcription elongation factor A (SII), 1                                                      | Nucleus         | transcription regulator | 8        | 9        | 6        | 10         | 9          | 8          | 0.45  | 0.11910 |
| IPI00032355 | Pumilio homolog 1                                                                             | PUM1     | pumilio homolog 1 (Drosophila)                                                                  | Cytoplasm       | other                   | 9        | 11       | 7        | 9          | 7          | 7          | -0.45 | 0.11962 |
| IPI00218486 | Isoform 1 of Protein phosphatase Slingshot homolog 3                                          | SSH3     | slingshot homolog 3 (Drosophila)                                                                | Cytoplasm       | phosphatase             | 8        | 8        | 11       | 7          | 9          | 7          | -0.45 | 0.11962 |
| IPI00382470 | Heat shock protein HSP 90-alpha 2                                                             | HSP90AA1 | heat shock protein 90kDa alpha (cytosolic)                                                      | Cytoplasm       | enzyme                  | 27       | 25       | 25       | 24         | 26         | 22         | -0.44 | 0.12119 |
| IPI00012199 | Hypothetical protein FUJ22321                                                                 | CCDC86   | coiled-coil domain containing 86                                                                | Nucleus         | other                   | 26       | 22       | 22       | 24         | 27         | 24         | 0.44  | 0.12137 |
| IPI00008961 | Telomeric repeat-binding factor 2-interacting protein 1                                       | TERF2IP  | telomeric repeat binding factor 2, interacting                                                  | Nucleus         | other                   | 2        | 3        | 0        | 3          | 3          | 3          | 0.44  | 0.12217 |
| IPI00221235 | nucleoporin 160kDa                                                                            | NUP160   | nucleoporin 160kDa                                                                              | Nucleus         | transporter             | 0        | 4        | 0        | 4          | 0          | 4          | 0.44  | 0.12217 |
| IPI00299512 | Isoform 2 of Neurofibromin                                                                    | NF1      | neurofibromin 1                                                                                 | Cytoplasm       | other                   | 2        | 2        | 2        | 3          | 2          | 4          | 0.44  | 0.12217 |
| IPI00296337 | Isoform 1 of DNA-dependent protein kinase catalytic subunit                                   | PRKDC    | protein kinase, DNA-activated, catalytic subunit                                                | Nucleus         | kinase                  | 4        | 3        | 2        | 2          | 1          | 3          | -0.44 | 0.12824 |
| IPI00026317 | Zinc finger and BTB domain-containing protein 7A                                              | ZBTB7A   | zinc finger and BTB domain containing 7A                                                        | Nucleus         | transcription regulator | 11       | 10       | 10       | 11         | 7          | 9          | -0.43 | 0.12985 |
| IPI00217957 | ELYS transcription factor-like protein TMBS62                                                 |          |                                                                                                 |                 |                         | 11       | 10       | 10       | 11         | 7          | 9          | -0.43 | 0.12985 |
| IPI00221394 | H/ACA ribonucleoprotein complex subunit 4                                                     | DKC1     | dyskeratosis congenita 1, dyskerin                                                              | Nucleus         | enzyme                  | 26       | 28       | 26       | 31         | 25         | 29         | 0.43  | 0.13003 |
| IPI00029601 | Src substrate cortactin                                                                       | CTTN     | cortactin                                                                                       | Plasma Membrane | other                   | 26       | 25       | 31       | 24         | 32         | 31         | 0.43  | 0.13035 |
| IPI00000846 | Isoform 1 of Chromodomain helicase-DNA-binding protein 4                                      | CHD4     | chromodomain helicase DNA binding protein 4                                                     | Nucleus         | enzyme                  | 2        | 1        | 4        | 3          | 4          | 3          | 0.42  | 0.13097 |
| IPI00018037 | Surfeit locus protein 2                                                                       | SURF2    | surfeit 2                                                                                       | unknown         | other                   | 2        | 4        | 0        | 4          | 4          | 2          | 0.42  | 0.13097 |
| IPI00178203 | Some homology with holliday junction DNA helicase RUVB like                                   | CTHF18   | CTF18, chromosome transmission fidelity                                                         | unknown         | other                   | 4        | 2        | 0        | 3          | 3          | 4          | 0.42  | 0.13097 |
| IPI00414963 | Isoform 2 of Polyadenylate-binding protein 2                                                  | PABPN1   | poly(A) binding protein, nuclear 1                                                              | Nucleus         | other                   | 3        | 2        | 2        | 3          | 3          | 4          | 0.42  | 0.13097 |
| IPI00009504 | Leukemia virus receptor 2                                                                     | SLC20A2  | solute carrier family 20 (phosphate transporter)                                                | Plasma Membrane | transporter             | 4        | 2        | 4        | 3          | 3          | 0          | -0.42 | 0.13292 |
| IPI00297579 | Chromobox protein homolog 3                                                                   | CBX3     | chromobox homolog 3                                                                             | Nucleus         | transcription regulator | 5        | 4        | 0        | 5          | 0          | 0          | -0.42 | 0.13292 |
| IPI00337386 | Isoform 2 of Pre-mRNA-processing factor 40 homolog A                                          | PRPF40A  | PRP40 pre-mRNA processing factor 40 homolog A                                                   | Nucleus         | other                   | 16       | 9        | 9        | 11         | 12         | 7          | -0.42 | 0.13344 |
| IPI00145593 | Nucleolar protein with MIF4G domain 1                                                         | NOM1     | nucleolar protein with MIF4G domain 1                                                           | Nucleus         | other                   | 0        | 3        | 4        | 3          | 3          | 5          | 0.41  | 0.13537 |
| IPI00218292 | Isoform Short of Ubiquitin fusion degradation protein 1 homolog 1                             | UFD1L    | ubiquitin fusion degradation protein 1 like (yeast)                                             | Cytoplasm       | peptidase               | 3        | 3        | 2        | 3          | 4          | 4          | 0.41  | 0.13537 |
| IPI00291755 | Isoform 1 of Nuclear pore membrane glycoprotein 210 precursor                                 | NUP210   | nucleoporin 210kDa                                                                              | Nucleus         | transporter             | 3        | 3        | 2        | 4          | 4          | 3          | 0.41  | 0.13537 |
| IPI00303063 | SCC-112 protein                                                                               |          |                                                                                                 |                 |                         | 3        | 3        | 2        | 5          | 2          | 4          | 0.41  | 0.13537 |
| IPI00418185 | Hypothetical protein FUJ20097                                                                 | CCDC132  | coiled-coil domain containing 132                                                               | unknown         | other                   | 4        | 0        | 3        | 5          | 3          | 3          | 0.41  | 0.13537 |
| IPI00021129 | Isoform 1 of AP-3 complex subunit beta-1                                                      | AP3B1    | adaptor-related protein complex 3, beta 1                                                       | Cytoplasm       | transporter             | 4        | 2        | 5        | 5          | 1          | 2          | -0.41 | 0.13708 |
| IPI00257508 | Dihydropyrimidinase-related protein 2                                                         | DPYSL2   | dihydropyrimidinase-like 2                                                                      | Cytoplasm       | enzyme                  | 4        | 3        | 4        | 1          | 3          | 4          | -0.41 | 0.13708 |
| IPI00513803 | Mitogen-activated protein kinase kinase 2                                                     | MAP3K2   | mitogen-activated protein kinase kinase 2                                                       | Cytoplasm       | kinase                  | 4        | 4        | 3        | 4          | 0          | 3          | -0.41 | 0.13708 |
| IPI00375358 | Isoform 1 of Replication factor C subunit 1                                                   | RFC1     | replication factor C (activator 1) 1, 145kD                                                     | Nucleus         | transcription regulator | 14       | 10       | 14       | 12         | 10         | 12         | -0.41 | 0.13755 |
| IPI00016580 | Isoform 1 of Protein C20orf172                                                                | DSN1     | (includes DSN1, MIND) kinetochore complex component 1                                           | Nucleus         | other                   | 3        | 3        | 3        | 4          | 5          | 3          | 0.41  | 0.13881 |
| IPI00156282 | G protein pathway suppressor 1 isoform 2                                                      | GPS1     | G protein pathway suppressor 1                                                                  | Nucleus         | other                   | 0        | 4        | 4        | 3          | 4          | 5          | 0.41  | 0.13881 |
| IPI00165261 | Sec1 family domain-containing protein 1                                                       | SCFD1    | sec1 family domain containing 1                                                                 | Cytoplasm       | transporter             | 3        | 3        | 3        | 5          | 2          | 5          | 0.41  | 0.13881 |
| IPI00215884 | splicing factor, arginine/serine-rich 1                                                       | SRSF1    | serine/arginine-rich splicing factor 1                                                          | Nucleus         | other                   | 2        | 2        | 5        | 5          | 3          | 4          | 0.41  | 0.13881 |
| IPI00216046 | SWI/SNF-related matrix-associated actin-dependent regulator of chromatin subfamily 1 member C | SMARCA1  | SWI/SNF related, matrix associated, actin dependent regulator of chromatin subfamily 1 member C | Nucleus         | transcription regulator | 3        | 4        | 2        | 5          | 3          | 4          | 0.41  | 0.13881 |
| IPI00217223 | Multifunctional protein ADE2                                                                  | PAICS    | phosphoribosylaminoimidazole carboxamide transferase                                            | Cytoplasm       | enzyme                  | 3        | 3        | 3        | 3          | 4          | 5          | 0.41  | 0.13881 |
| IPI00419100 | Isoform 1 of FYVE, RhoGEF and PH domain-containing protein 6                                  | FGD6     | FYVE, RhoGEF and PH domain containing                                                           | Cytoplasm       | other                   | 3        | 3        | 3        | 3          | 5          | 4          | 0.41  | 0.13881 |
| IPI00456970 | Isoform 1 of Cell division cycle 2-like protein kinase 5                                      | CDK13    | cyclin-dependent kinase 13                                                                      | Nucleus         | kinase                  | 2        | 3        | 4        | 3          | 3          | 6          | 0.41  | 0.13881 |
| IPI00009505 | Isoform 1 of Beta-2-syntrophin                                                                | SNTB2    | syntrophin, beta 2 (dystrophin-associated)                                                      | Plasma Membrane | other                   | 3        | 4        | 5        | 4          | 3          | 2          | -0.41 | 0.14309 |
| IPI00012202 | Methylosome protein 50                                                                        | WDR77    | WD repeat domain 77                                                                             | Nucleus         | transcription regulator | 4        | 3        | 5        | 2          | 4          | 3          | -0.41 | 0.14309 |
| IPI00004970 | Small subunit processome component 20 homolog                                                 | UTP20    | UTP20, small subunit (SSU) processome component 20                                              | Nucleus         | other                   | 3        | 4        | 3        | 4          | 4          | 5          | 0.40  | 0.14496 |
| IPI00064931 | Isoform 2 of E1A-binding protein p400                                                         | EP400    | E1A binding protein p400                                                                        | Nucleus         | other                   | 3        | 3        | 4        | 6          | 3          | 4          | 0.40  | 0.14496 |
| IPI00641181 | MARCKS-related protein                                                                        | MARCKSL1 | MARCKS-like 1                                                                                   | Cytoplasm       | other                   | 0        | 5        | 4        | 6          | 5          | 2          | 0.40  | 0.14496 |
| IPI00031556 | Splicing factor U2AF 65 kDa subunit                                                           | U2AF2    | U2 small nuclear RNA auxiliary factor 2                                                         | Nucleus         | other                   | 4        | 3        | 6        | 4          | 3          | 3          | -0.40 | 0.14648 |
| IPI00043978 | Isoform 1 of Amyotrophic lateral sclerosis 2 chromosome region                                | PARD3B   | par-3 partitioning defective 3 homolog B                                                        | Plasma Membrane | other                   | 3        | 5        | 5        | 0          | 5          | 4          | -0.40 | 0.14648 |
| IPI00385729 | OTTHUMP00000022614                                                                            | KIAA1984 | KIAA1984                                                                                        | unknown         | other                   | 5        | 4        | 4        | 0          | 4          | 5          | -0.40 | 0.14648 |
| IPI00014298 | Periodic tryptophan protein 1 homolog                                                         | PWP1     | PWP1 homolog (S. cerevisiae)                                                                    | Nucleus         | other                   | 5        | 3        | 3        | 5          | 5          | 4          | 0.39  | 0.14749 |
| IPI00290142 | CTP synthase                                                                                  | CTPS     | CTP synthase                                                                                    | Nucleus         | enzyme                  | 3        | 3        | 5        | 5          | 5          | 4          | 0.39  | 0.14749 |
| IPI00411984 | Serine/threonine-protein kinase 3                                                             | STK3     | serine/threonine kinase 3                                                                       | Cytoplasm       | kinase                  | 15       | 19       | 14       | 17         | 14         | 13         | -0.39 | 0.14754 |
| IPI00013721 | Serine/threonine-protein kinase PRP4 homolog                                                  | PRPF4B   | PRP4 pre-mRNA processing factor 4 homolog B                                                     | Nucleus         | kinase                  | 19       | 18       | 13       | 20         | 16         | 10         | -0.39 | 0.14902 |
| IPI00024971 | Oxysterol-binding protein 1                                                                   | OSBP     | oxysterol binding protein                                                                       | Cytoplasm       | other                   | 14       | 15       | 18       | 17         | 16         | 18         | 0.39  | 0.14903 |
| IPI00179964 | Isoform 1 of Polypyrimidine tract-binding protein 1                                           | PTBP1    | polypyrimidine tract binding protein 1                                                          | Nucleus         | enzyme                  | 5        | 5        | 2        | 5          | 5          | 5          | 0.38  | 0.14932 |

**Supplemental Table 1. A list of all phosphorylated proteins identified in SNU216 and SNU216-LR.**

| Accession   | Identified Proteins                                               | Symbol   | Entrez Gene Name                                   | Location        | Type(s)                 | SNU216-1 | SNU216-2 | SNU216-3 | SNU216-LR1 | SNU216-LR2 | SNU216-LR3 | STN   | p-value |
|-------------|-------------------------------------------------------------------|----------|----------------------------------------------------|-----------------|-------------------------|----------|----------|----------|------------|------------|------------|-------|---------|
| IPI00023640 | Programmed cell death protein 5                                   | PDCD5    | programmed cell death 5                            | Nucleus         | other                   | 5        | 6        | 4        | 6          | 4          | 2          | -0.38 | 0.15199 |
| IPI00306723 | CCAAT/enhancer-binding protein zeta                               | CEBPZ    | CCAAT/enhancer binding protein (C/EBP)             | Nucleus         | other                   | 4        | 4        | 7        | 3          | 4          | 5          | -0.38 | 0.15199 |
| IPI00472901 | chromodomain helicase DNA binding protein 7                       | CHD7     | chromodomain helicase DNA binding prc              | Nucleus         | enzyme                  | 4        | 7        | 4        | 3          | 6          | 3          | -0.38 | 0.15199 |
| IPI00216230 | Lamina-associated polypeptide 2 isoform alpha                     | TMPO     | thymopoietin                                       | Nucleus         | other                   | 17       | 14       | 18       | 21         | 18         | 14         | 0.38  | 0.15200 |
| IPI00294834 | Aspartyl/asparaginyl beta-hydroxylase                             | ASPH     | aspartate beta-hydroxylase                         | Cytoplasm       | enzyme                  | 5        | 4        | 4        | 5          | 4          | 7          | 0.38  | 0.15279 |
| IPI00165995 | Isoform 1 of Splicing factor, arginine/serine-rich 130            | PNISR    | PNN-interacting serine/arginine-rich prot          | Nucleus         | other                   | 5        | 6        | 5        | 5          | 4          | 4          | -0.38 | 0.15399 |
| IPI00028888 | Isoform 1 of Heterogeneous nuclear ribonucleoprotein D0           | HNRNPD   | heterogeneous nuclear ribonucleoprotein            | Nucleus         | transcription regulator | 17       | 17       | 19       | 18         | 21         | 18         | 0.38  | 0.15419 |
| IPI00025100 | 2-oxoisovalerate dehydrogenase alpha subunit, mitochondrial prc   | BCKDHA   | branched chain keto acid dehydrogenase             | Cytoplasm       | enzyme                  | 6        | 5        | 3        | 5          | 7          | 5          | 0.37  | 0.15477 |
| IPI00022460 | Zinc finger protein 592                                           | ZNF592   | zinc finger protein 592                            | Nucleus         | other                   | 5        | 5        | 7        | 3          | 6          | 5          | -0.37 | 0.15574 |
| IPI00328715 | Protein LYRIC                                                     | MTDH     | metadherin                                         | Cytoplasm       | transcription regulator | 7        | 4        | 6        | 7          | 1          | 6          | -0.37 | 0.15574 |
| IPI00029081 | ligase III, DNA, ATP-dependent isoform alpha precursor            | LIG3     | ligase III, DNA, ATP-dependent                     | Nucleus         | enzyme                  | 5        | 5        | 5        | 6          | 5          | 7          | 0.37  | 0.15644 |
| IPI00152692 | Probable D-tyrosyl-tRNA(Tyr) deacylase                            | DTD1     | D-tyrosyl-tRNA deacylase 1 homolog (S. cerevisiae) | Cytoplasm       | enzyme                  | 5        | 5        | 5        | 7          | 6          | 5          | 0.37  | 0.15644 |
| IPI00006093 | Protein FAM38A                                                    |          |                                                    |                 |                         | 6        | 4        | 9        | 6          | 4          | 6          | -0.36 | 0.15996 |
| IPI00011069 | Isoform 2 of Uracil-DNA glycosylase                               | UNG      | uracil-DNA glycosylase                             | Nucleus         | enzyme                  | 6        | 5        | 6        | 7          | 6          | 7          | 0.36  | 0.16038 |
| IPI00412676 | CDNA FLJ43339 fis, clone NT2RI3007291                             | C15orf52 | chromosome 15 open reading frame 52                | unknown         | other                   | 7        | 6        | 4        | 8          | 6          | 6          | 0.36  | 0.16038 |
| IPI00554715 | fragile X mental retardation-related protein 1 isoform b          | FXR1     | fragile X mental retardation, autosomal h          | Cytoplasm       | other                   | 8        | 8        | 4        | 7          | 4          | 6          | -0.36 | 0.16119 |
| IPI00001661 | RCC1 protein                                                      | RCC1     | regulator of chromosome condensation 1             | Cytoplasm       | other                   | 8        | 6        | 7        | 5          | 4          | 9          | -0.35 | 0.16335 |
| IPI00021417 | U4/U6.U5 tri-snRNP-associated protein 1                           | SART1    | squamous cell carcinoma antigen recogni            | Nucleus         | other                   | 7        | 4        | 8        | 9          | 6          | 7          | 0.35  | 0.16370 |
| IPI00179473 | Isoform 1 of Sequestosome-1                                       | SQSTM1   | sequestosome 1                                     | Cytoplasm       | transcription regulator | 6        | 5        | 8        | 7          | 9          | 6          | 0.35  | 0.16370 |
| IPI00023109 | Chromodomain-helicase-DNA-binding protein 2                       | CHD2     | chromodomain helicase DNA binding prc              | Nucleus         | enzyme                  | 8        | 6        | 8        | 7          | 5          | 7          | -0.35 | 0.16441 |
| IPI00411614 | WD repeat and HMG-box DNA-binding protein 1                       | WDHD1    | WD repeat and HMG-box DNA binding p                | Nucleus         | other                   | 7        | 7        | 8        | 8          | 5          | 6          | -0.35 | 0.16441 |
| IPI00419791 | hypothetical protein LOC65117 isoform a                           | RSRC2    | arginine/serine-rich coiled-coil 2                 | unknown         | other                   | 9        | 10       | 3        | 7          | 6          | 6          | -0.35 | 0.16441 |
| IPI00007277 | LRR FLI-I interacting protein 2                                   | LRRFIP2  | leucine rich repeat (in FLII) interacting prc      | unknown         | other                   | 6        | 6        | 8        | 8          | 7          | 8          | 0.35  | 0.16477 |
| IPI00025330 | Isoform 2 of Cyclin-L1                                            |          |                                                    |                 |                         | 10       | 4        | 6        | 7          | 10         | 6          | 0.35  | 0.16477 |
| IPI00398779 | plectin 1 isoform 11                                              | PLEC     | plectin                                            | Cytoplasm       | other                   | 7        | 5        | 8        | 8          | 8          | 7          | 0.35  | 0.16477 |
| IPI00643014 | retinoblastoma-associated factor 600                              | UBR4     | ubiquitin protein ligase E3 component n-           | Nucleus         | other                   | 6        | 8        | 6        | 7          | 7          | 9          | 0.35  | 0.16477 |
| IPI00215965 | heterogeneous nuclear ribonucleoprotein A1 isoform b              | HNRNPA1  | heterogeneous nuclear ribonucleoprotein            | Nucleus         | other                   | 6        | 5        | 10       | 7          | 7          | 10         | 0.34  | 0.16552 |
| IPI00554711 | Junction plakoglobin                                              | JUP      | junction plakoglobin                               | Plasma Membrane | other                   | 7        | 6        | 8        | 8          | 8          | 8          | 0.34  | 0.16552 |
| IPI00185027 | Isoform 1 of Arginine-glutamic acid dipeptide repeats protein     | RERE     | arginine-glutamic acid dipeptide (RE) rep          | Nucleus         | other                   | 9        | 7        | 8        | 7          | 6          | 8          | -0.34 | 0.16684 |
| IPI00305152 | SEC31L1 protein                                                   | SEC31A   | SEC31 homolog A (S. cerevisiae)                    | Cytoplasm       | other                   | 7        | 8        | 7        | 10         | 9          | 6          | 0.34  | 0.16687 |
| IPI00016910 | Eukaryotic translation initiation factor 3 subunit 8              |          |                                                    |                 |                         | 8        | 8        | 9        | 7          | 8          | 7          | -0.34 | 0.16740 |
| IPI00019205 | Protein C14orf4                                                   | IRF2BP1  | interferon regulatory factor 2 binding prc         | Nucleus         | other                   | 7        | 9        | 9        | 6          | 7          | 9          | -0.34 | 0.16740 |
| IPI00021954 | Golgi-specific brefeldin A-resistance guanine nucleotide exchange | GBF1     | golgi brefeldin A resistant guanine nucleoc        | Cytoplasm       | other                   | 8        | 7        | 10       | 7          | 6          | 9          | -0.34 | 0.16740 |
| IPI00162549 | SP110 nuclear body protein isoform c                              | SP110    | SP110 nuclear body protein                         | Nucleus         | other                   | 9        | 9        | 7        | 9          | 7          | 6          | -0.34 | 0.16740 |
| IPI00021766 | Isoform 1 of Reticulon-4                                          | RTN4     | reticulon 4                                        | Cytoplasm       | other                   | 6        | 9        | 8        | 8          | 9          | 9          | 0.34  | 0.16757 |
| IPI00395568 | Isoform 1 of PHD finger protein 6                                 | PHF6     | PHD finger protein 6                               | Nucleus         | other                   | 8        | 8        | 10       | 8          | 8          | 7          | -0.34 | 0.16820 |
| IPI00000030 | Isoform Delta-1 of Serine/threonine-protein phosphatase 2A 56 kDa | PPP2R5D  | protein phosphatase 2, regulatory subuni           | Nucleus         | phosphatase             | 0        | 0        | 1        | 0          | 3          | 1          | 0.33  | 0.16831 |
| IPI00003479 | Mitogen-activated protein kinase 1                                | MAPK1    | mitogen-activated protein kinase 1                 | Cytoplasm       | kinase                  | 1        | 1        | 1        | 1          | 2          | 2          | 0.33  | 0.16831 |
| IPI00003627 | Isoform 1 of Actin-like protein 6A                                | ACTL6A   | actin-like 6A                                      | Nucleus         | other                   | 1        | 0        | 1        | 3          | 0          | 1          | 0.33  | 0.16831 |
| IPI00004068 | Mediator of RNA polymerase II transcription subunit 12            | MED12    | mediator complex subunit 12                        | Nucleus         | transcription regulator | 0        | 0        | 0        | 0          | 2          | 2          | 0.33  | 0.16831 |
| IPI00006715 | Double-strand-break repair protein rad21 homolog                  | RAD21    | RAD21 homolog (S. pombe)                           | Nucleus         | other                   | 1        | 1        | 1        | 3          | 1          | 1          | 0.33  | 0.16831 |
| IPI00008223 | UV excision repair protein RAD23 homolog B                        | RAD23B   | RAD23 homolog B (S. cerevisiae)                    | Nucleus         | other                   | 0        | 0        | 0        | 0          | 3          | 0          | 0.33  | 0.16831 |
| IPI00012429 | Isoform 2 of Protein C9orf5                                       | C9orf5   | chromosome 9 open reading frame 5                  | unknown         | other                   | 0        | 0        | 0        | 0          | 2          | 2          | 0.33  | 0.16831 |
| IPI0013452  | glutamyl-prolyl tRNA synthetase                                   | EPRS     | glutamyl-prolyl-tRNA synthetase                    | Cytoplasm       | enzyme                  | 1        | 1        | 1        | 0          | 2          | 2          | 0.33  | 0.16831 |
| IPI00015806 | Isoform 1 of General transcription factor 3C polypeptide 3        | GTF3C3   | general transcription factor 3C, polypepti         | Nucleus         | transcription regulator | 0        | 0        | 0        | 0          | 3          | 0          | 0.33  | 0.16831 |
| IPI00020468 | Selenoprotein S                                                   | SELS     | selenoprotein S                                    | Cytoplasm       | other                   | 0        | 0        | 0        | 0          | 0          | 3          | 0.33  | 0.16831 |
| IPI00021595 | Glucocorticoid induced transcript 1                               | GLCC1    | glucocorticoid induced transcript 1                | Cytoplasm       | other                   | 0        | 0        | 0        | 2          | 0          | 2          | 0.33  | 0.16831 |
| IPI00022661 | Isoform Delta of Poliovirus receptor-related protein 2 precursor  | PVRL2    | poliovirus receptor-related 2 (herpesvirus         | Plasma Membrane | other                   | 0        | 0        | 0        | 1          | 2          | 2          | 0.33  | 0.16831 |
| IPI00023649 | MOP-3                                                             | SBNO1    | strawberry notch homolog 1 (Drosophila)            | unknown         | enzyme                  | 0        | 0        | 0        | 2          | 2          | 0          | 0.33  | 0.16831 |
| IPI00025849 | Acidic leucine-rich nuclear phosphoprotein 32 family member A     |          |                                                    |                 |                         | 1        | 1        | 1        | 1          | 2          | 2          | 0.33  | 0.16831 |
| IPI00026256 | Filaggrin                                                         | FLG      | filaggrin                                          | Cytoplasm       | other                   | 0        | 0        | 0        | 0          | 0          | 3          | 0.33  | 0.16831 |
| IPI00027834 | heterogeneous nuclear ribonucleoprotein L isoform a               | HNRNPL   | heterogeneous nuclear ribonucleoprotein            | Nucleus         | other                   | 1        | 1        | 0        | 1          | 0          | 3          | 0.33  | 0.16831 |
| IPI00028059 | Isoform 1 of Protein numb homolog                                 | NUMB     | numb homolog (Drosophila)                          | Plasma Membrane | other                   | 0        | 0        | 0        | 0          | 3          | 0          | 0.33  | 0.16831 |
| IPI00028357 | Exportin-4                                                        | XPO4     | exportin 4                                         | Nucleus         | transporter             | 0        | 0        | 0        | 0          | 3          | 0          | 0.33  | 0.16831 |

**Supplemental Table 1. A list of all phosphorylated proteins identified in SNU216 and SNU216-LR.**

| Accession   | Identified Proteins                                                              | Symbol    | Entrez Gene Name                                                          | Location            | Type(s)                 | SNU216-1 | SNU216-2 | SNU216-3 | SNU216-LR1 | SNU216-LR2 | SNU216-LR3 | STN   | p-value |
|-------------|----------------------------------------------------------------------------------|-----------|---------------------------------------------------------------------------|---------------------|-------------------------|----------|----------|----------|------------|------------|------------|-------|---------|
| IPI00033600 | Isoform 1 of Protein phosphatase 1 regulatory subunit 7                          | PPP1R7    | protein phosphatase 1, regulatory subunit 7                               | Nucleus             | phosphatase             | 0        | 1        | 1        | 3          | 1          | 1          | 0.33  | 0.16831 |
| IPI00152853 | Isoform 1 of Protein KIAA1949                                                    | PPP1R18   | protein phosphatase 1, regulatory subunit 18                              | unknown             | other                   | 0        | 0        | 0        | 0          | 2          | 2          | 0.33  | 0.16831 |
| IPI00166612 | cardiomyopathy associated 5                                                      | CMYA5     | cardiomyopathy associated 5                                               | Plasma Membrane     | other                   | 0        | 0        | 0        | 3          | 0          | 0          | 0.33  | 0.16831 |
| IPI00166933 | Protein C10orf12                                                                 | C10orf12  | chromosome 10 open reading frame 12                                       | unknown             | other                   | 0        | 1        | 0        | 0          | 0          | 3          | 0.33  | 0.16831 |
| IPI00173461 | Junctophilin-1                                                                   | JPH1      | junctophilin 1                                                            | Plasma Membrane     | other                   | 0        | 0        | 0        | 3          | 0          | 0          | 0.33  | 0.16831 |
| IPI00176702 | Protein KIAA1543                                                                 | CAMSAP3   | calmodulin regulated spectrin-associated protein 3                        | Cytoplasm           | other                   | 0        | 0        | 0        | 0          | 3          | 0          | 0.33  | 0.16831 |
| IPI00177642 | Coiled-coil domain-containing protein 9                                          | CCDC9     | coiled-coil domain containing 9                                           | unknown             | other                   | 0        | 0        | 0        | 3          | 0          | 0          | 0.33  | 0.16831 |
| IPI00181556 | CDNA FLJ90551 fis, clone OVARC1000779, weakly similar to ZINC1                   | ZNF777    | zinc finger protein 777                                                   | unknown             | other                   | 0        | 0        | 0        | 0          | 0          | 3          | 0.33  | 0.16831 |
| IPI00215928 | Centrin-2                                                                        | CETN2     | centrin, EF-hand protein, 2                                               | Nucleus             | enzyme                  | 0        | 1        | 0        | 1          | 2          | 2          | 0.33  | 0.16831 |
| IPI00217340 | KIBRA protein                                                                    | WWC1      | WW and C2 domain containing 1                                             | Cytoplasm           | transcription regulator | 0        | 0        | 0        | 0          | 3          | 0          | 0.33  | 0.16831 |
| IPI00217661 | Isoform 2 of Protein raver-1                                                     | RAVER1    | ribonucleoprotein, PTB-binding 1                                          | Nucleus             | other                   | 0        | 0        | 0        | 0          | 3          | 0          | 0.33  | 0.16831 |
| IPI00234446 | activating transcription factor 2                                                | ATF2      | activating transcription factor 2                                         | Nucleus             | transcription regulator | 0        | 0        | 0        | 0          | 0          | 3          | 0.33  | 0.16831 |
| IPI00297877 | CDNA FLJ40166 fis, clone TESTI2016197                                            | KIAA0556  | KIAA0556                                                                  | Extracellular Space | other                   | 0        | 0        | 0        | 2          | 2          | 0          | 0.33  | 0.16831 |
| IPI00299116 | Podocalyxin-like protein 1 precursor                                             | PODXL     | podocalyxin-like                                                          | Plasma Membrane     | kinase                  | 0        | 0        | 0        | 2          | 2          | 0          | 0.33  | 0.16831 |
| IPI00305545 | debranching enzyme homolog 1                                                     | DBR1      | (includes) debranching enzyme homolog 1 (S. cerevisiae)                   | Nucleus             | enzyme                  | 0        | 1        | 0        | 0          | 3          | 1          | 0.33  | 0.16831 |
| IPI00306369 | NOL1/NOP2/Sun domain family 2 protein                                            | NSUN2     | NOP2/Sun domain family, member 2                                          | Nucleus             | enzyme                  | 0        | 1        | 1        | 2          | 1          | 2          | 0.33  | 0.16831 |
| IPI00328835 | Isoform 1 of Serine/threonine-protein kinase 32C                                 | STK32C    | serine/threonine kinase 32C                                               | unknown             | kinase                  | 0        | 0        | 0        | 0          | 0          | 3          | 0.33  | 0.16831 |
| IPI00329488 | Isoform IB of Tyrosine-protein kinase ABL2                                       | ABL2      | v-abl Abelson murine leukemia viral oncogene protein 2                    | Cytoplasm           | kinase                  | 0        | 0        | 0        | 0          | 0          | 3          | 0.33  | 0.16831 |
| IPI00334713 | Isoform 3 of Heterogeneous nuclear ribonucleoprotein A/B                         | HNRNPAB   | heterogeneous nuclear ribonucleoprotein A/B                               | Nucleus             | enzyme                  | 0        | 0        | 0        | 3          | 0          | 0          | 0.33  | 0.16831 |
| IPI00395663 | Ankyrin repeat and SAM domain-containing protein 1A                              | ANKS1A    | ankyrin repeat and sterile alpha motif domain containing 1A               | Cytoplasm           | other                   | 0        | 0        | 0        | 0          | 0          | 3          | 0.33  | 0.16831 |
| IPI00396561 | Leucine-rich repeats and calponin homology (CH) domain containing protein 3      | LRCH3     | leucine-rich repeats and calponin homology domain containing 3            | unknown             | other                   | 0        | 0        | 0        | 0          | 3          | 0          | 0.33  | 0.16831 |
| IPI00398170 | CDNA FLJ43547 fis, clone PROST2016462                                            | ARHGAP27  | Rho GTPase activating protein 27                                          | Cytoplasm           | other                   | 0        | 0        | 0        | 0          | 0          | 3          | 0.33  | 0.16831 |
| IPI00410127 | Transforming, acidic coiled-coil containing protein 2                            | TACC2     | transforming, acidic coiled-coil containing 2                             | Nucleus             | other                   | 0        | 0        | 0        | 3          | 0          | 0          | 0.33  | 0.16831 |
| IPI00411715 | Isoform 2 of Nuclear factor NF-kappa-B p100 subunit                              | NFKB2     | nuclear factor of kappa light polypeptide chain 2                         | Nucleus             | transcription regulator | 0        | 0        | 1        | 0          | 0          | 3          | 0.33  | 0.16831 |
| IPI00418991 | CDNA FLJ44035 fis, clone TESTI4028612                                            | QSER1     | glutamine and serine rich 1                                               | unknown             | other                   | 0        | 0        | 0        | 2          | 0          | 2          | 0.33  | 0.16831 |
| IPI00429547 | Isoform 4 of Aftiphilin                                                          | AFTPH     | aftiphilin                                                                | Cytoplasm           | other                   | 0        | 0        | 0        | 0          | 0          | 3          | 0.33  | 0.16831 |
| IPI00465074 | Isoform 3 of Kinesin light chain 3                                               | KLC3      | kinesin light chain 3                                                     | Cytoplasm           | enzyme                  | 0        | 0        | 0        | 2          | 2          | 0          | 0.33  | 0.16831 |
| IPI00479143 | Pericentriolar protein 1                                                         | PCNT      | pericentriolar protein 1                                                  | Cytoplasm           | other                   | 0        | 0        | 0        | 0          | 2          | 2          | 0.33  | 0.16831 |
| IPI00654583 | PREDICTED: hypothetical protein XP_944986                                        | FAM83G    | family with sequence similarity 83, member 3                              | unknown             | other                   | 0        | 0        | 0        | 0          | 3          | 0          | 0.33  | 0.16831 |
| IPI00656088 | Isoform 1 of Ras-associated and pleckstrin homology domains-containing protein 1 | RAPH1     | Ras association (RalGDS/AF-6) and pleckstrin homology domain containing 1 | Plasma Membrane     | other                   | 0        | 0        | 0        | 1          | 0          | 3          | 0.33  | 0.16831 |
| IPI00737659 | PREDICTED: hypothetical protein LOC440193 isoform 1                              | CCDC88C   | coiled-coil domain containing 88C                                         | unknown             | other                   | 1        | 1        | 1        | 0          | 2          | 2          | 0.33  | 0.16831 |
| IPI00738216 | PREDICTED: hypothetical protein LOC23379                                         | KIAA0947  | KIAA0947                                                                  | unknown             | other                   | 1        | 0        | 0        | 3          | 0          | 0          | 0.33  | 0.16831 |
| IPI00002803 | Serine/threonine-protein kinase N1                                               | PKN1      | protein kinase N1                                                         | Cytoplasm           | kinase                  | 0        | 3        | 0        | 0          | 0          | 0          | -0.33 | 0.19043 |
| IPI00005715 | Isoform 1 of Ubiquitin conjugation factor E4 B                                   | UBE4B     | ubiquitination factor E4B                                                 | Cytoplasm           | enzyme                  | 0        | 2        | 2        | 0          | 0          | 0          | -0.33 | 0.19043 |
| IPI00022058 | Isoform 1 of Development and differentiation-enhancing factor 2                  | ASAP2     | ArfGAP with SH3 domain, ankyrin repeat domain containing 2                | Nucleus             | enzyme                  | 0        | 0        | 3        | 0          | 0          | 0          | -0.33 | 0.19043 |
| IPI00024234 | Phosphatidate cytidylyltransferase 1                                             | CDS1      | CDP-diacylglycerol synthase (phosphatidate cytidylyltransferase)          | Cytoplasm           | enzyme                  | 2        | 1        | 2        | 0          | 1          | 0          | -0.33 | 0.19043 |
| IPI00029697 | exosome component 9 isoform 1                                                    | EXOSC9    | exosome component 9                                                       | Nucleus             | enzyme                  | 3        | 0        | 0        | 0          | 1          | 0          | -0.33 | 0.19043 |
| IPI00029702 | Isoform 1 of Protein tyrosine kinase 2 beta                                      | PTK2B     | (includes) PTK2B protein tyrosine kinase 2 beta                           | Cytoplasm           | kinase                  | 3        | 0        | 0        | 0          | 0          | 0          | -0.33 | 0.19043 |
| IPI00064162 | Deubiquitinating protein VCIPI35                                                 | VCIPI1    | valosin containing protein (p97)/p47 component 1                          | Cytoplasm           | peptidase               | 0        | 1        | 3        | 0          | 0          | 1          | -0.33 | 0.19043 |
| IPI00107357 | CLPTM1 protein                                                                   | CLPTM1    | cleft lip and palate associated transmembrane protein 1                   | Plasma Membrane     | other                   | 0        | 0        | 3        | 1          | 0          | 0          | -0.33 | 0.19043 |
| IPI00154388 | oxysterol-binding protein-like protein 5 isoform b                               | OSBPL5    | oxysterol binding protein-like 5                                          | Cytoplasm           | other                   | 0        | 0        | 3        | 0          | 0          | 0          | -0.33 | 0.19043 |
| IPI00157442 | Rho guanine nucleotide exchange factor 11                                        | ARHGEF11  | Rho guanine nucleotide exchange factor 11                                 | Cytoplasm           | other                   | 1        | 3        | 1        | 0          | 0          | 0          | -0.33 | 0.19043 |
| IPI00170744 | ETS-related transcription factor Elf-4                                           | ELF4      | E74-like factor 4 (ets domain transcription factor)                       | Nucleus             | transcription regulator | 0        | 3        | 0        | 0          | 0          | 0          | -0.33 | 0.19043 |
| IPI00179109 | Isoform 1 of NAD-dependent deacetylase sirtuin-2                                 | SIRT2     | sirtuin 2                                                                 | Nucleus             | transcription regulator | 0        | 3        | 0        | 0          | 0          | 0          | -0.33 | 0.19043 |
| IPI00183535 | Isoform 1 of REST corepressor 3                                                  | RCOR3     | REST corepressor 3                                                        | Nucleus             | other                   | 0        | 3        | 0        | 0          | 0          | 0          | -0.33 | 0.19043 |
| IPI00216633 | Isoform Short of Dematin                                                         | DCMT1     | dematin                                                                   | unknown             | other                   | 0        | 3        | 0        | 0          | 0          | 0          | -0.33 | 0.19043 |
| IPI00217490 | Factor for adipocyte differentiation 104 variant (Fragment)                      | FNDC3B    | fibronectin type III domain containing 3B                                 | Cytoplasm           | other                   | 2        | 2        | 0        | 0          | 0          | 0          | -0.33 | 0.19043 |
| IPI00217842 | PREDICTED: hypothetical protein LOC114825                                        | LOC114825 | LOC114825                                                                 | unknown             | other                   | 0        | 3        | 0        | 0          | 0          | 0          | -0.33 | 0.19043 |
| IPI00240675 | programmed cell death 4 isoform 2                                                | PDCD4     | programmed cell death 4 (neoplastic transcription factor)                 | Nucleus             | other                   | 2        | 2        | 0        | 0          | 0          | 0          | -0.33 | 0.19043 |
| IPI00288941 | Nuclear receptor coactivator 5                                                   | NCOA5     | nuclear receptor coactivator 5                                            | Nucleus             | other                   | 0        | 3        | 0        | 0          | 0          | 0          | -0.33 | 0.19043 |
| IPI00289876 | syntaxin 7                                                                       | STX7      | syntaxin 7                                                                | Plasma Membrane     | transporter             | 2        | 2        | 0        | 1          | 1          | 1          | -0.33 | 0.19043 |
| IPI00292376 | GEM-interacting protein                                                          | GMIP      | GEM interacting protein                                                   | Cytoplasm           | enzyme                  | 0        | 3        | 0        | 0          | 0          | 0          | -0.33 | 0.19043 |
| IPI00295774 | Solute carrier family 23 member 2                                                | SLC23A2   | solute carrier family 23 (nucleobase transporter)                         | Plasma Membrane     | transporter             | 0        | 0        | 3        | 0          | 0          | 0          | -0.33 | 0.19043 |
| IPI00307592 | ATP-binding cassette, sub-family A, member 2 isoform a                           | ABCA2     | ATP-binding cassette, sub-family A (ABC1) member 2                        | Plasma Membrane     | transporter             | 0        | 0        | 3        | 0          | 0          | 0          | -0.33 | 0.19043 |

**Supplemental Table 1. A list of all phosphorylated proteins identified in SNU216 and SNU216-LR.**

| Accession   | Identified Proteins                                                               | Symbol   | Entrez Gene Name                                              | Location        | Type(s)                 | SNU216-1 | SNU216-2 | SNU216-3 | SNU216-LR1 | SNU216-LR2 | SNU216-LR3 | STN | p-value |         |
|-------------|-----------------------------------------------------------------------------------|----------|---------------------------------------------------------------|-----------------|-------------------------|----------|----------|----------|------------|------------|------------|-----|---------|---------|
| IPI00329291 | Isoform 2 of StAR-related lipid transfer protein 13                               | STARD13  | StAR-related lipid transfer (START) domain                    | Cytoplasm       | other                   | 3        | 0        | 0        | 0          | 0          | 0          | 0   | -0.33   | 0.19043 |
| IPI00329635 | Isoform 1 of Folliculin                                                           | FLCN     | folliculin                                                    | Cytoplasm       | other                   | 3        | 0        | 0        | 0          | 0          | 0          | 0   | -0.33   | 0.19043 |
| IPI00333067 | HECT and RCC1 containing protein 4 isoform 1                                      | HERC4    | hect domain and RLD 4                                         | unknown         | enzyme                  | 0        | 3        | 0        | 0          | 0          | 0          | 0   | -0.33   | 0.19043 |
| IPI00337694 | Isoform 1 of Rap guanine nucleotide exchange factor 6                             | RAPGEF6  | Rap guanine nucleotide exchange factor 6                      | Plasma Membrane | other                   | 2        | 2        | 0        | 1          | 1          | 0          | 0   | -0.33   | 0.19043 |
| IPI00386464 | ring finger protein 12                                                            | RLIM     | ring finger protein, LIM domain interactor                    | Nucleus         | enzyme                  | 2        | 2        | 0        | 0          | 1          | 0          | 0   | -0.33   | 0.19043 |
| IPI00465439 | Fructose-bisphosphate aldolase A                                                  | ALDOA    | aldolase A, fructose-bisphosphate                             | Cytoplasm       | enzyme                  | 2        | 0        | 2        | 1          | 0          | 1          | 0   | -0.33   | 0.19043 |
| IPI00740155 | Hypothetical protein DKFZp686J17211                                               | MSL1     | male-specific lethal 1 homolog (Drosophila)                   | Nucleus         | other                   | 3        | 0        | 0        | 0          | 0          | 0          | 0   | -0.33   | 0.19043 |
| IPI00375731 | Hypothetical protein DKFZp686E2459                                                | RBM10    | RNA binding motif protein 10                                  | Nucleus         | other                   | 10       | 10       | 8        | 9          | 6          | 10         | 10  | -0.33   | 0.19256 |
| IPI00168036 | CDNA FLJ35151 fis, clone PLACE6010701                                             | TMEM40   | transmembrane protein 40                                      | unknown         | other                   | 9        | 7        | 8        | 8          | 8          | 11         | 11  | 0.33    | 0.19326 |
| IPI00292134 | Epidermal growth factor receptor substrate 15                                     | EPS15    | epidermal growth factor receptor pathway                      | Plasma Membrane | other                   | 8        | 10       | 6        | 9          | 9          | 9          | 9   | 0.33    | 0.19326 |
| IPI00019901 | Isoform 1 of Alpha-adducin                                                        | ADD1     | adducin 1 (alpha)                                             | Cytoplasm       | other                   | 8        | 11       | 11       | 7          | 10         | 10         | 10  | -0.33   | 0.19482 |
| IPI00069817 | Isoform 1 of Bromodomain adjacent to zinc finger domain protein 1                 | BAZ1B    | bromodomain adjacent to zinc finger domain protein 1          | Nucleus         | transcription regulator | 9        | 11       | 11       | 9          | 9          | 10         | 10  | -0.32   | 0.19521 |
| IPI00411886 | Nucleolar complex protein 2 homolog                                               | NOC2L    | nucleolar complex associated 2 homolog                        | Nucleus         | transcription regulator | 10       | 10       | 11       | 10         | 10         | 8          | 8   | -0.32   | 0.19521 |
| IPI00007334 | Isoform 1 of Apoptotic chromatin condensation inducer in the nucleus              | ACIN1    | apoptotic chromatin condensation inducer in the nucleus       | Nucleus         | enzyme                  | 33       | 33       | 34       | 37         | 35         | 32         | 32  | 0.33    | 0.19549 |
| IPI00009866 | Isoform 1 of Keratin, type I cytoskeletal 13                                      | KRT13    | keratin 13                                                    | Cytoplasm       | other                   | 8        | 8        | 10       | 10         | 9          | 10         | 10  | 0.33    | 0.19549 |
| IPI00418458 | Isoform 1 of Pinin                                                                | PNN      | pinin, desmosome associated protein                           | Plasma Membrane | other                   | 32       | 35       | 33       | 34         | 36         | 34         | 34  | 0.33    | 0.19549 |
| IPI00102752 | Isoform 1 of Putative RNA-binding protein 15                                      | RBM15    | RNA binding motif protein 15                                  | Nucleus         | other                   | 11       | 9        | 13       | 8          | 11         | 11         | 11  | -0.32   | 0.19671 |
| IPI00013881 | heterogeneous nuclear ribonucleoprotein H1                                        | HNRNPH1  | heterogeneous nuclear ribonucleoprotein H1                    | Nucleus         | other                   | 12       | 8        | 8        | 9          | 11         | 11         | 11  | 0.32    | 0.19751 |
| IPI00007138 | Isoform 1 of Disks large-associated protein 4                                     | DLGAP4   | discs, large (Drosophila) homolog-associated protein 4        | Plasma Membrane | other                   | 0        | 2        | 0        | 2          | 2          | 2          | 2   | 0.32    | 0.19942 |
| IPI00030116 | Isoform 1 of Phosphoacetylglucosamine mutase                                      | PGM3     | phosphoglucomutase 3                                          | Cytoplasm       | enzyme                  | 2        | 1        | 1        | 3          | 1          | 2          | 2   | 0.32    | 0.19942 |
| IPI00186536 | Isoform B of Mitogen-activated protein kinase kinase kinase 4                     | MAP3K4   | mitogen-activated protein kinase kinase kinase 4              | Cytoplasm       | kinase                  | 0        | 2        | 0        | 2          | 2          | 2          | 2   | 0.32    | 0.19942 |
| IPI00295004 | Isoform 1 of Alsin                                                                | ALS2     | amyotrophic lateral sclerosis 2 (juvenile)                    | Cytoplasm       | other                   | 1        | 0        | 2        | 0          | 2          | 3          | 3   | 0.32    | 0.19942 |
| IPI00297900 | Probable ATP-dependent RNA helicase DDX10                                         | DDX10    | DEAD (Asp-Glu-Ala-Asp) box polypeptide                        | Nucleus         | enzyme                  | 0        | 0        | 2        | 3          | 2          | 0          | 0   | 0.32    | 0.19942 |
| IPI00334294 | Rac GTPase activating protein                                                     | ARHGAP32 | Rho GTPase activating protein 32                              | Cytoplasm       | other                   | 0        | 2        | 0        | 3          | 2          | 0          | 0   | 0.32    | 0.19942 |
| IPI00386662 | Isoform 4 of FUS-interacting serine-arginine-rich protein 1                       | DIRAS3   | DIRAS domain containing protein 3                             | Cytoplasm       | other                   | 1        | 1        | 2        | 2          | 2          | 2          | 2   | 0.32    | 0.19942 |
| IPI00413140 | Dynamin-1                                                                         | DNM1     | dynamin 1                                                     | Cytoplasm       | enzyme                  | 0        | 0        | 2        | 4          | 0          | 0          | 0   | 0.32    | 0.19942 |
| IPI00442274 | nuclear transcription factor, X-box binding-like 1                                | NFXL1    | nuclear transcription factor, X-box binding-like 1            | Nucleus         | transcription regulator | 0        | 2        | 0        | 4          | 0          | 0          | 0   | 0.32    | 0.19942 |
| IPI00009329 | Utrophin                                                                          | UTRN     | utrophin                                                      | Plasma Membrane | transmembrane receptor  | 2        | 2        | 2        | 1          | 1          | 2          | 2   | -0.32   | 0.20686 |
| IPI00010088 | Histone deacetylase 4                                                             | HDAC4    | histone deacetylase 4                                         | Nucleus         | transcription regulator | 2        | 2        | 2        | 2          | 0          | 0          | 0   | -0.32   | 0.20686 |
| IPI00010882 | Isoform DFF45 of DNA fragmentation factor alpha subunit (Fragmentation factor 45) | DFFA     | DNA fragmentation factor, 45kDa, alpha subunit                | Nucleus         | enzyme                  | 2        | 3        | 0        | 2          | 1          | 0          | 0   | -0.32   | 0.20686 |
| IPI00293963 | Chromodomain Y-like protein                                                       | CDYL     | chromodomain protein, Y-like                                  | Nucleus         | transcription regulator | 0        | 3        | 2        | 2          | 1          | 0          | 0   | -0.32   | 0.20686 |
| IPI00479125 | SLIT-ROBO Rho GTPase-activating protein 2                                         | SRGAP2   | SLIT-ROBO Rho GTPase activating protein 2                     | Cytoplasm       | other                   | 2        | 3        | 0        | 0          | 2          | 0          | 0   | -0.32   | 0.20686 |
| IPI00022215 | Activity-dependent neuroprotector                                                 | ADNP     | activity-dependent neuroprotector homolog 1                   | Nucleus         | transcription regulator | 9        | 13       | 13       | 12         | 10         | 10         | 10  | -0.31   | 0.20763 |
| IPI00163505 | Isoform 1 of RNA-binding region-containing protein 2                              | RBM39    | RNA binding motif protein 39                                  | Nucleus         | transcription regulator | 13       | 13       | 9        | 11         | 12         | 9          | 9   | -0.31   | 0.20763 |
| IPI00216546 | Isoform 2 of Probable palmitoyltransferase ZDHHC5                                 | ZDHHC5   | zinc finger, DHHC-type containing 5                           | Nucleus         | other                   | 12       | 11       | 13       | 10         | 11         | 12         | 12  | -0.31   | 0.20793 |
| IPI00180625 | KIAA0284 protein                                                                  | KIAA0284 | KIAA0284                                                      | unknown         | other                   | 12       | 12       | 14       | 10         | 13         | 12         | 12  | -0.31   | 0.20847 |
| IPI00029795 | Isoform 4 of Nuclear factor 1 C-type                                              | NFIC     | nuclear factor 1/C (CCAAT-binding transcription factor 1)     | Nucleus         | transcription regulator | 14       | 10       | 9        | 14         | 12         | 10         | 10  | 0.31    | 0.20933 |
| IPI00000001 | Isoform Long of Double-stranded RNA-binding protein Staufen 1                     | STAU1    | staufen, RNA binding protein, homolog 1                       | Cytoplasm       | transporter             | 2        | 1        | 2        | 1          | 2          | 4          | 4   | 0.31    | 0.21067 |
| IPI00000279 | Hypothetical protein LEREPO4                                                      | ZC3H15   | zinc finger CCH-type containing 15                            | Nucleus         | other                   | 2        | 2        | 1        | 3          | 1          | 3          | 3   | 0.31    | 0.21067 |
| IPI00004838 | Isoform Crk-II of Proto-oncogene C-crk                                            | CRK      | v-crk sarcoma virus CT10 oncogene homolog 2                   | Cytoplasm       | other                   | 2        | 1        | 2        | 1          | 3          | 3          | 3   | 0.31    | 0.21067 |
| IPI00008231 | Chromosome 1 open reading frame 9                                                 | C1orf9   | chromosome 1 open reading frame 9                             | unknown         | other                   | 2        | 0        | 2        | 0          | 3          | 3          | 3   | 0.31    | 0.21067 |
| IPI00011461 | Isoform Beta of Striatin-3                                                        | STRN3    | striatin, calmodulin binding protein 3                        | Nucleus         | transcription regulator | 3        | 1        | 1        | 3          | 1          | 3          | 3   | 0.31    | 0.21067 |
| IPI00024816 | Hypothetical protein FLJ22484                                                     | MFF      | mitochondrial fission factor                                  | Cytoplasm       | other                   | 0        | 0        | 3        | 3          | 0          | 3          | 3   | 0.31    | 0.21067 |
| IPI00103709 | Isoform 1 of Inhibitor of growth protein 5                                        | ING5     | inhibitor of growth family, member 5                          | Nucleus         | other                   | 0        | 0        | 3        | 2          | 2          | 3          | 3   | 0.31    | 0.21067 |
| IPI00180764 | Histone acetyltransferase MYST2                                                   | KAT7     | K(lysine) acetyltransferase 7                                 | Nucleus         | enzyme                  | 3        | 0        | 0        | 3          | 3          | 0          | 0   | 0.31    | 0.21067 |
| IPI00007935 | PDZ and LIM domain protein 5                                                      | PDLIM5   | PDZ and LIM domain 5                                          | Cytoplasm       | other                   | 1        | 3        | 3        | 1          | 3          | 0          | 0   | -0.31   | 0.22133 |
| IPI00008240 | Methionyl-tRNA synthetase                                                         | MARS     | methionyl-tRNA synthetase                                     | Cytoplasm       | enzyme                  | 2        | 2        | 3        | 2          | 2          | 1          | 1   | -0.31   | 0.22133 |
| IPI00465449 | Meningioma-expressed antigen 5s splice variant                                    | MGEA5    | meningioma expressed antigen 5 (hyaluronan-binding protein 5) | Cytoplasm       | enzyme                  | 2        | 2        | 3        | 2          | 2          | 0          | 0   | -0.31   | 0.22133 |
| IPI00216044 | Isoform 1 of RNA-binding protein Raly                                             | RALY     | RNA binding protein, autoantigenic (hnRNP A1)                 | Nucleus         | other                   | 13       | 14       | 16       | 11         | 14         | 15         | 15  | -0.30   | 0.22243 |
| IPI00171199 | Isoform 2 of Proteasome subunit alpha type 3                                      | PSMA3    | proteasome (prosome, macropain) subunit alpha type 3          | Cytoplasm       | peptidase               | 14       | 12       | 11       | 12         | 14         | 14         | 14  | 0.30    | 0.22273 |
| IPI00386211 | family with sequence similarity 44, member A                                      | BOD1L    | biorientation of chromosomes in cell division 1               | unknown         | other                   | 12       | 13       | 14       | 12         | 14         | 16         | 16  | 0.30    | 0.22324 |
| IPI00004388 | Tyrosine-protein phosphatase non-receptor type 21                                 | PTPN21   | protein tyrosine phosphatase, non-receptor type 21            | Cytoplasm       | phosphatase             | 2        | 2        | 2        | 2          | 2          | 4          | 4   | 0.30    | 0.22461 |
| IPI00022827 | Isoform 1 of STE20-like serine/threonine-protein kinase                           | SLK      | STE20-like kinase                                             | Nucleus         | kinase                  | 2        | 2        | 2        | 2          | 3          | 3          | 3   | 0.30    | 0.22461 |
| IPI00028392 | specifically androgen-regulated protein                                           | C1orf116 | chromosome 1 open reading frame 116                           | unknown         | other                   | 2        | 2        | 2        | 4          | 0          | 3          | 3   | 0.30    | 0.22461 |

**Supplemental Table 1. A list of all phosphorylated proteins identified in SNU216 and SNU216-LR.**

| Accession    | Identified Proteins                                                 | Symbol        | Entrez Gene Name                                  | Location        | Type(s)                 | SNU216-1 | SNU216-2 | SNU216-3 | SNU216-LR1 | SNU216-LR2 | SNU216-LR3 | STN   | p-value |
|--------------|---------------------------------------------------------------------|---------------|---------------------------------------------------|-----------------|-------------------------|----------|----------|----------|------------|------------|------------|-------|---------|
| IPI00043622  | Isoform 1 of FERM domain-containing protein 6                       | FRMD6         | FERM domain containing 6                          | Cytoplasm       | other                   | 0        | 4        | 0        | 3          | 4          | 0          | 0.30  | 0.22461 |
| IPI00178072  | Cytospin-A                                                          | SPECC1L       | sperm antigen with calponin homology a            | unknown         | other                   | 1        | 3        | 2        | 2          | 3          | 3          | 0.30  | 0.22461 |
| IPI00413144  | Hypothetical protein DKFZp686B18208                                 | C15orf42      | chromosome 15 open reading frame 42               | Nucleus         | other                   | 0        | 3        | 2        | 2          | 0          | 5          | 0.30  | 0.22461 |
| IPI000419847 | Isoform Alpha of Vexin                                              | SORBS3        | sorbin and SH3 domain containing 3                | Cytoplasm       | other                   | 2        | 2        | 2        | 2          | 4          | 2          | 0.30  | 0.22461 |
| IPI00003515  | Thyroid receptor-interacting protein 11                             | TRIP11        | thyroid hormone receptor interactor 11            | Cytoplasm       | transcription regulator | 3        | 3        | 2        | 2          | 2          | 2          | -0.30 | 0.22844 |
| IPI00011891  | protein kinase, AMP-activated, alpha 1 catalytic subunit isoform    | PRKAA1        | protein kinase, AMP-activated, alpha 1 ca         | Cytoplasm       | kinase                  | 3        | 2        | 3        | 2          | 1          | 3          | -0.30 | 0.22844 |
| IPI00020524  | Putative chloride channel protein 7                                 | CLCN7         | chloride channel 7                                | Plasma Membrane | ion channel             | 3        | 3        | 2        | 2          | 3          | 0          | -0.30 | 0.22844 |
| IPI00020985  | E1A-associated protein p300                                         | EP300         | E1A binding protein p300                          | Nucleus         | transcription regulator | 2        | 3        | 3        | 3          | 0          | 2          | -0.30 | 0.22844 |
| IPI00022184  | Isoform 3 of Pumilio homolog 2                                      | PUM2          | pumilio homolog 2 (Drosophila)                    | Cytoplasm       | other                   | 3        | 3        | 2        | 3          | 2          | 0          | -0.30 | 0.22844 |
| IPI00022479  | guanine nucleotide exchange factor p532                             | HERC1         | hect (homologous to the E6-AP (UBE3A))            | Cytoplasm       | other                   | 3        | 2        | 3        | 0          | 2          | 3          | -0.30 | 0.22844 |
| IPI00295022  | NK-tumor recognition protein                                        | NKTR          | natural killer-tumor recognition sequence         | Plasma Membrane | other                   | 2        | 3        | 3        | 0          | 2          | 3          | -0.30 | 0.22844 |
| IPI00328342  | Isoform 1 of Sodium bicarbonate cotransporter 3                     | SLC4A7        | solute carrier family 4, sodium bicarbonat        | Plasma Membrane | transporter             | 2        | 3        | 3        | 0          | 0          | 4          | -0.30 | 0.22844 |
| IPI00642705  | Isoform 2 of AT-rich interactive domain-containing protein 1A       | ARID1A        | AT rich interactive domain 1A (SWI-like)          | Nucleus         | transcription regulator | 2        | 3        | 3        | 2          | 0          | 3          | -0.30 | 0.22844 |
| IPI00414676  | Heat shock protein HSP 90-beta                                      | HSP90AB1      | heat shock protein 90kDa alpha (cytosolic)        | Cytoplasm       | enzyme                  | 50       | 63       | 70       | 55         | 64         | 68         | 0.29  | 0.23162 |
| IPI00027505  | Integrin alpha-V precursor                                          | ITGAV         | integrin, alpha V (vitronectin receptor, alpha V) | Plasma Membrane | other                   | 2        | 2        | 3        | 2          | 4          | 3          | 0.29  | 0.23171 |
| IPI00103516  | Caskin-2                                                            | CASKIN2       | CASK interacting protein 2                        | Cytoplasm       | other                   | 0        | 0        | 5        | 4          | 2          | 3          | 0.29  | 0.23171 |
| IPI00219913  | Ubiquitin carboxyl-terminal hydrolase 14                            | USP14         | ubiquitin specific peptidase 14 (tRNA-guan        | Cytoplasm       | peptidase               | 3        | 3        | 1        | 3          | 4          | 2          | 0.29  | 0.23171 |
| IPI00009772  | BET1-like protein                                                   | BET1L         | blocked early in transport 1 homolog (S.          | Cytoplasm       | transporter             | 3        | 3        | 3        | 3          | 2          | 2          | -0.29 | 0.23919 |
| IPI00009917  | Isoform 3 of LAS1-like protein                                      | LAS1L         | LAS1-like (S. cerevisiae)                         | Nucleus         | other                   | 5        | 2        | 2        | 4          | 0          | 2          | -0.29 | 0.23919 |
| IPI00013949  | Small glutamine-rich tetratricopeptide repeat-containing protein    | SGTA          | small glutamine-rich tetratricopeptide repeat     | Cytoplasm       | other                   | 3        | 3        | 3        | 4          | 0          | 2          | -0.29 | 0.23919 |
| IPI00016250  | Fragile X mental retardation syndrome-related protein 2             | FXR2          | fragile X mental retardation, autosomal h         | Cytoplasm       | other                   | 3        | 3        | 3        | 2          | 3          | 2          | -0.29 | 0.23919 |
| IPI00022228  | Vigilin                                                             | HDLBP         | high density lipoprotein binding protein          | Nucleus         | transporter             | 3        | 2        | 4        | 3          | 2          | 2          | -0.29 | 0.23919 |
| IPI00026219  | Cleavage and polyadenylation specificity factor, 160 kDa subunit    | CPSF1         | cleavage and polyadenylation specific fac         | Nucleus         | other                   | 3        | 3        | 3        | 2          | 2          | 3          | -0.29 | 0.23919 |
| IPI00028493  | Isoform 1 of Tuberin                                                | TSC2          | tuberous sclerosis 2                              | Cytoplasm       | other                   | 4        | 3        | 2        | 4          | 0          | 2          | -0.29 | 0.23919 |
| IPI00032491  | Inner nuclear membrane protein Man1                                 | LEMD3         | LEM domain containing 3                           | Nucleus         | other                   | 3        | 4        | 2        | 4          | 2          | 0          | -0.29 | 0.23919 |
| IPI00063387  | 28 kDa protein                                                      | TFPT          | TCF3 (E2A) fusion partner (in childhood L         | Nucleus         | other                   | 2        | 3        | 4        | 0          | 3          | 3          | -0.29 | 0.23919 |
| IPI00149098  | Isoform 2 of Transcription initiation factor TFIID subunit 1        | TAF1 (include | TAF1 RNA polymerase II, TATA box bindin           | Nucleus         | transcription regulator | 2        | 3        | 4        | 3          | 3          | 0          | -0.29 | 0.23919 |
| IPI00168698  | PDZ domain-containing protein 8                                     | PDZD8         | PDZ domain containing 8                           | unknown         | other                   | 3        | 5        | 1        | 3          | 2          | 2          | -0.29 | 0.23919 |
| IPI00220045  | Isoform 1 of DNA-directed RNA polymerases III 80 kDa polypeptide    | POLR3E        | polymerase (RNA) III (DNA directed) polypeptide   | Nucleus         | transcription regulator | 3        | 4        | 2        | 3          | 0          | 3          | -0.29 | 0.23919 |
| IPI00289082  | Tyrosine-protein phosphatase non-receptor type 12                   | PTPN12        | protein tyrosine phosphatase, non-receptor        | Cytoplasm       | phosphatase             | 0        | 4        | 4        | 0          | 4          | 2          | -0.29 | 0.23919 |
| IPI00304742  | Serine/threonine-protein kinase 10                                  | STK10         | serine/threonine kinase 10                        | Cytoplasm       | kinase                  | 3        | 3        | 3        | 3          | 2          | 2          | -0.29 | 0.23919 |
| IPI000329791 | Probable ATP-dependent RNA helicase DDX46                           | DDX46         | DEAD (Asp-Glu-Ala-Asp) box polypeptide            | Nucleus         | enzyme                  | 3        | 3        | 3        | 4          | 1          | 2          | -0.29 | 0.23919 |
| IPI00337602  | 56 kDa protein                                                      | ZNF326        | zinc finger protein 326                           | Nucleus         | transcription regulator | 5        | 3        | 0        | 3          | 0          | 3          | -0.29 | 0.23919 |
| IPI00643923  | PREDICTED: similar to HLA-B associated transcript-2 isoform a       | PRRC2B        | proline-rich coiled-coil 2B                       | unknown         | other                   | 2        | 6        | 0        | 5          | 0          | 0          | -0.29 | 0.23919 |
| IPI00002188  | Brefeldin A-inhibited guanine nucleotide-exchange protein 1         | ARFGEF1       | ADP-ribosylation factor guanine nucleotid         | Cytoplasm       | other                   | 3        | 1        | 4        | 3          | 3          | 4          | 0.28  | 0.24156 |
| IPI00002478  | Isoform B of Endothelin-converting enzyme 1                         | ECE1          | endothelin converting enzyme 1                    | Plasma Membrane | peptidase               | 2        | 3        | 3        | 4          | 3          | 3          | 0.28  | 0.24156 |
| IPI00291608  | Isoform 1 of PEST-containing nuclear protein                        | PCNP          | PEST proteolytic signal containing nuclear        | Nucleus         | other                   | 3        | 4        | 1        | 3          | 2          | 5          | 0.28  | 0.24156 |
| IPI00036742  | hypothetical protein LOC25962 isoform 1                             | KIAA1429      | KIAA1429                                          | Nucleus         | other                   | 3        | 2        | 5        | 0          | 3          | 4          | -0.28 | 0.24435 |
| IPI00296388  | Isoform 1 of Bromodomain adjacent to zinc finger domain 2A          | BAZ2A         | bromodomain adjacent to zinc finger domain        | Nucleus         | transcription regulator | 3        | 2        | 5        | 2          | 2          | 4          | -0.28 | 0.24435 |
| IPI00296421  | PREDICTED: EH domain binding protein 1-like 1 isoform 1             | EHBP1L1       | EH domain binding protein 1-like 1                | Cytoplasm       | other                   | 4        | 0        | 5        | 1          | 3          | 4          | -0.28 | 0.24435 |
| IPI00337736  | Isoform 2 of Kinectin                                               | KTN1          | kinectin 1 (kinesin receptor)                     | Cytoplasm       | other                   | 23       | 23       | 16       | 24         | 17         | 18         | -0.28 | 0.24457 |
| IPI00302917  | AT rich interactive domain 4B isoform 2                             | ARID4B        | AT rich interactive domain 4B (RBP1-like)         | Nucleus         | other                   | 3        | 3        | 3        | 3          | 2          | 6          | 0.27  | 0.24628 |
| IPI00442210  | Isoform 1 of Abl interactor 2                                       | ABI2          | abl-interactor 2                                  | Cytoplasm       | other                   | 0        | 5        | 3        | 0          | 5          | 5          | 0.27  | 0.24628 |
| IPI00513791  | dedicator of cytokinesis 7                                          | DOCK7         | dedicator of cytokinesis 7                        | Plasma Membrane | other                   | 3        | 3        | 3        | 4          | 4          | 3          | 0.27  | 0.24628 |
| IPI00289746  | Isoform 2 of Serine/threonine-protein kinase PAK 1                  | PAK1          | p21 protein (Cdc42/Rac)-activated kinase          | Cytoplasm       | kinase                  | 3        | 3        | 5        | 3          | 3          | 3          | -0.27 | 0.25029 |
| IPI00410126  | PPP1R2P3 protein                                                    | PPP1R2P3      | protein phosphatase 1, regulatory (inhibit        | unknown         | other                   | 3        | 4        | 4        | 4          | 3          | 2          | -0.27 | 0.25029 |
| IPI00328293  | Serine/arginine repetitive matrix 1                                 | SRRM1         | serine/arginine repetitive matrix 1               | Nucleus         | other                   | 95       | 86       | 75       | 80         | 84         | 88         | -0.27 | 0.25091 |
| IPI00289776  | Isoform 1 of Probable ubiquitin ligase protein MYCBP2               | MYCBP2        | MYC binding protein 2                             | Nucleus         | enzyme                  | 2        | 3        | 5        | 3          | 4          | 5          | 0.27  | 0.25294 |
| IPI00396279  | CLIP-associating protein 1                                          | CLASP1        | cytoplasmic linker associated protein 1           | Cytoplasm       | other                   | 4        | 5        | 0        | 4          | 4          | 4          | 0.27  | 0.25294 |
| IPI00414095  | Eukaryotic translation initiation factor 4E nuclear import factor 1 | EIF4ENIF1     | eukaryotic translation initiation factor 4E       | Cytoplasm       | translation regulator   | 3        | 4        | 3        | 5          | 4          | 3          | 0.27  | 0.25294 |
| IPI00604399  | Isoform 2 of Fanconi anemia group D2 protein                        | FANCD2        | Fanconi anemia, complementation group             | Nucleus         | other                   | 5        | 3        | 2        | 6          | 3          | 3          | 0.27  | 0.25294 |
| IPI00749302  | Hypothetical protein DKFZp686L20116                                 | FAM122B       | family with sequence similarity 122B              | unknown         | other                   | 3        | 4        | 3        | 4          | 5          | 3          | 0.27  | 0.25294 |
| IPI00170548  | Isoform 1 of ATPase family AAA domain-containing protein 2          | ATAD2         | ATPase family, AAA domain containing 2            | Nucleus         | other                   | 5        | 2        | 5        | 4          | 3          | 3          | -0.27 | 0.25666 |
| IPI00250716  | Isoform B of Bromodomain and WD-repeat domain-containing protein    | BRWD1         | bromodomain and WD repeat domain containing       | Nucleus         | transcription regulator | 3        | 4        | 5        | 4          | 4          | 2          | -0.27 | 0.25666 |



**Supplemental Table 1. A list of all phosphorylated proteins identified in SNU216 and SNU216-LR.**

| Accession   | Identified Proteins                                            | Symbol       | Entrez Gene Name                              | Location        | Type(s)                 | SNU216-1 | SNU216-2 | SNU216-3 | SNU216-LR1 | SNU216-LR2 | SNU216-LR3 | STN   | p-value |
|-------------|----------------------------------------------------------------|--------------|-----------------------------------------------|-----------------|-------------------------|----------|----------|----------|------------|------------|------------|-------|---------|
| IPI00020984 | Calnexin precursor                                             | CANX         | calnexin                                      | Cytoplasm       | other                   | 21       | 23       | 29       | 25         | 25         | 20         | -0.27 | 0.25682 |
| IPI00465128 | Isoform 1 of Large proline-rich protein BAT3                   | BAG6         | BCL2-associated athanogene 6                  | Nucleus         | enzyme                  | 25       | 27       | 22       | 28         | 25         | 24         | 0.26  | 0.25840 |
| IPI00045051 | Transcriptional activator protein Pur-beta                     | PURB         | purine-rich element binding protein B         | Nucleus         | transcription regulator | 4        | 3        | 4        | 4          | 4          | 5          | 0.26  | 0.25857 |
| IPI00306087 | WDR79 protein                                                  | WRAP53       | WD repeat containing, antisense to TP53       | Nucleus         | other                   | 4        | 4        | 3        | 6          | 3          | 4          | 0.26  | 0.25857 |
| IPI00328798 | DLNB11 protein                                                 | BCL9L        | B-cell CLL/lymphoma 9-like                    | Cytoplasm       | other                   | 4        | 3        | 4        | 3          | 7          | 3          | 0.26  | 0.25857 |
| IPI00454969 | PHD finger protein 14                                          | PHF14        | PHD finger protein 14                         | unknown         | other                   | 3        | 4        | 4        | 5          | 3          | 5          | 0.26  | 0.25857 |
| IPI00167941 | Midasin                                                        | MDN1         | MDN1, midasin homolog (yeast)                 | Nucleus         | other                   | 7        | 4        | 2        | 5          | 2          | 5          | -0.26 | 0.26100 |
| IPI00440502 | BRD2 protein                                                   | BRD2         | bromodomain containing 2                      | Nucleus         | kinase                  | 5        | 4        | 4        | 3          | 4          | 4          | -0.26 | 0.26100 |
| IPI00021728 | Eukaryotic translation initiation factor 2 subunit 2           | EIF2S2       | eukaryotic translation initiation factor 2, s | Cytoplasm       | translation regulator   | 5        | 4        | 3        | 5          | 3          | 6          | 0.26  | 0.26271 |
| IPI00329692 | Isoform Long of Glycylpeptide N-tetradecanoyltransferase 1     | NMT1         | N-myristoyltransferase 1                      | Cytoplasm       | enzyme                  | 4        | 4        | 4        | 5          | 5          | 4          | 0.26  | 0.26271 |
| IPI00448767 | Growth factor receptor-bound protein 7                         | GRB7         | growth factor receptor-bound protein 7        | Plasma Membrane | other                   | 6        | 4        | 4        | 4          | 4          | 4          | -0.26 | 0.26541 |
| IPI00549766 | Isoform 1 of Protein FAM40A                                    | FAM40A       | family with sequence similarity 40, memb      | Nucleus         | other                   | 5        | 4        | 4        | 5          | 6          | 4          | 0.25  | 0.26730 |
| IPI00554648 | Keratin, type II cytoskeletal 8                                | KRT8         | keratin 8                                     | Cytoplasm       | other                   | 6        | 5        | 4        | 7          | 3          | 3          | -0.25 | 0.26945 |
| IPI00006213 | Pericentriolar material 1                                      | PCM1         | pericentriolar material 1                     | Cytoplasm       | other                   | 4        | 4        | 6        | 6          | 6          | 4          | 0.25  | 0.27108 |
| IPI00178047 | Proline and glutamic acid rich nuclear protein isoform         | PELP1        | proline, glutamate and leucine rich protei    | Nucleus         | other                   | 6        | 5        | 5        | 5          | 6          | 3          | -0.25 | 0.27257 |
| IPI00419844 | U4/U6.U5 tri-snRNP-associated protein 2                        | USP39        | ubiquitin specific peptidase 39               | Nucleus         | peptidase               | 7        | 4        | 5        | 3          | 6          | 5          | -0.25 | 0.27257 |
| IPI00026689 | Hypothetical protein DKFZp686L20222                            | CDK1         | cyclin-dependent kinase 1                     | Nucleus         | kinase                  | 4        | 6        | 5        | 7          | 5          | 5          | 0.25  | 0.27437 |
| IPI00021712 | Isoform Long of Restin                                         | CLIP1        | CAP-GLY domain containing linker protei       | Cytoplasm       | other                   | 5        | 5        | 5        | 6          | 6          | 5          | 0.25  | 0.27437 |
| IPI00021290 | ATP-citrate synthase                                           | ACLY         | ATP citrate lyase                             | Cytoplasm       | enzyme                  | 4        | 6        | 7        | 6          | 5          | 4          | -0.25 | 0.27601 |
| IPI00291607 | Inositol 1,4,5-trisphosphate receptor type 3                   | ITPR3        | inositol 1,4,5-trisphosphate receptor, type   | Cytoplasm       | ion channel             | 6        | 6        | 5        | 5          | 5          | 5          | -0.25 | 0.27601 |
| IPI00006029 | Isoform 1 of Forkhead box protein K2                           | FOXK2        | forkhead box K2                               | Nucleus         | transcription regulator | 4        | 6        | 6        | 7          | 5          | 6          | 0.24  | 0.27769 |
| IPI00015195 | Cleavage stimulation factor, 77 kDa subunit                    | CSTF3        | cleavage stimulation factor, 3' pre-RNA, s    | Nucleus         | other                   | 5        | 6        | 5        | 7          | 5          | 6          | 0.24  | 0.27769 |
| IPI00028954 | 80 kDa MCM3-associated protein                                 | MCM3AP       | minichromosome maintenance complex c          | Nucleus         | other                   | 5        | 7        | 4        | 5          | 7          | 6          | 0.24  | 0.27769 |
| IPI00032597 | RNA-binding motif protein, X-linked 2                          | RBMX2        | RNA binding motif protein, X-linked 2         | unknown         | other                   | 4        | 7        | 5        | 7          | 7          | 4          | 0.24  | 0.27769 |
| IPI00169307 | Rho GTPase activating protein 21                               | ARHGAP21     | Rho GTPase activating protein 21              | Cytoplasm       | other                   | 5        | 8        | 3        | 5          | 9          | 4          | 0.24  | 0.27769 |
| IPI00181359 | SFRS2-interacting protein                                      | SCAF11       | SR-related CTD-associated factor 11           | Nucleus         | other                   | 5        | 5        | 6        | 6          | 6          | 6          | 0.24  | 0.27769 |
| IPI00419693 | activating transcription factor 7 interacting protein          | ATF7IP       | activating transcription factor 7 interactin  | Nucleus         | transcription regulator | 4        | 5        | 7        | 7          | 5          | 6          | 0.24  | 0.27769 |
| IPI00012645 | Isoform 1 of Spectrin beta chain, brain 2                      | SPTBN2       | spectrin, beta, non-erythrocytic 2            | Cytoplasm       | other                   | 6        | 6        | 5        | 7          | 7          | 5          | 0.24  | 0.28066 |
| IPI00021695 | Isoform D of Plasma membrane calcium-transporting ATPase 1     | ATP2B1       | ATPase, Ca++ transporting, plasma meml        | Plasma Membrane | transporter             | 5        | 6        | 6        | 5          | 7          | 7          | 0.24  | 0.28066 |
| IPI00218566 | Isoform 1A of Mitogen-activated protein kinase kinase kinase 7 | MAP3K7 (incl | mitogen-activated protein kinase kinase k     | Cytoplasm       | kinase                  | 5        | 6        | 6        | 5          | 6          | 8          | 0.24  | 0.28066 |
| IPI00005861 | Isoform 1 of U4/U6 small nuclear ribonucleoprotein Prp3        | PRPF3        | PRP3 pre-mRNA processing factor 3 hom         | Nucleus         | other                   | 7        | 5        | 7        | 8          | 4          | 5          | -0.24 | 0.28100 |
| IPI00438229 | Isoform 1 of Transcription intermediary factor 1-beta          | TRIM28       | tripartite motif containing 28                | Nucleus         | transcription regulator | 4        | 7        | 7        | 6          | 6          | 8          | 0.24  | 0.28297 |
| IPI00549725 | Phosphoglycerate mutase 1                                      | PGAM1        | phosphoglycerate mutase 1 (brain)             | Cytoplasm       | phosphatase             | 6        | 5        | 7        | 6          | 6          | 8          | 0.24  | 0.28297 |
| IPI00398992 | Isoform 1 of Chromodomain-helicase-DNA-binding protein 8       | CHD8         | chromodomain helicase DNA binding prc         | Nucleus         | enzyme                  | 6        | 8        | 6        | 7          | 5          | 6          | -0.24 | 0.28387 |
| IPI00642862 | Peptidyl-prolyl cis-trans isomerase-like 4                     | PPIL4        | peptidylprolyl isomerase (cyclophilin)-like   | Nucleus         | enzyme                  | 6        | 6        | 8        | 8          | 4          | 6          | -0.24 | 0.28387 |
| IPI00290452 | Transmembrane BAX inhibitor motif-containing protein 1         | TMBIM1       | transmembrane BAX inhibitor motif conta       | unknown         | other                   | 6        | 7        | 8        | 5          | 6          | 8          | -0.23 | 0.28592 |
| IPI00014843 | leucine rich repeat containing 16                              | LRRC16A      | leucine rich repeat containing 16A            | Cytoplasm       | enzyme                  | 6        | 7        | 7        | 7          | 6          | 9          | 0.23  | 0.28763 |
| IPI00063234 | PRKAR2A protein                                                | PRKAR2A      | protein kinase, cAMP-dependent, regulat       | Cytoplasm       | kinase                  | 6        | 7        | 7        | 7          | 7          | 8          | 0.23  | 0.28763 |
| IPI00004795 | Methylosome subunit pICln                                      | CLNS1A       | chloride channel, nucleotide-sensitive, 1A    | Plasma Membrane | ion channel             | 8        | 8        | 8        | 8          | 5          | 9          | -0.23 | 0.29083 |
| IPI00413734 | Isoform 6 of Transcriptional regulator ATRX                    | ATRX         | alpha thalassemia/mental retardation syn      | Nucleus         | transcription regulator | 7        | 10       | 7        | 12         | 5          | 5          | -0.23 | 0.29083 |
| IPI00163849 | Epidermal growth factor receptor substrate 15-like 1           | EPS15L1      | epidermal growth factor receptor pathwa       | Plasma Membrane | other                   | 7        | 8        | 8        | 9          | 6          | 10         | 0.23  | 0.29236 |
| IPI00030466 | PREDICTED: hypothetical protein LOC26115 isoform 1             | TANC2        | tetratricopeptide repeat, ankyrin repeat a    | Nucleus         | transcription regulator | 10       | 8        | 8        | 7          | 8          | 9          | -0.22 | 0.29433 |
| IPI00169434 | Grb10 interacting GYF protein 2                                | GIGYF2       | GRB10 interacting GYF protein 2               | unknown         | other                   | 6        | 9        | 10       | 8          | 10         | 9          | 0.22  | 0.29585 |
| IPI00298696 | Treacle protein                                                | TCOF1        | Treacher Collins-Franceschetti syndrome       | Nucleus         | transporter             | 60       | 60       | 49       | 63         | 55         | 48         | -0.22 | 0.29614 |
| IPI00444371 | WD repeat domain 44 protein                                    | WDR44        | WD repeat domain 44                           | Cytoplasm       | other                   | 9        | 8        | 9        | 9          | 11         | 8          | 0.22  | 0.29753 |
| IPI00000861 | Isoform 1 of LIM and SH3 domain protein 1                      | LASP1        | LIM and SH3 protein 1                         | Cytoplasm       | transporter             | 12       | 7        | 9        | 9          | 11         | 6          | -0.22 | 0.29779 |
| IPI00373870 | Isoform 1 of Chromodomain helicase-DNA-binding protein 3       |              |                                               |                 |                         | 12       | 9        | 7        | 8          | 6          | 12         | -0.22 | 0.29779 |
| IPI00375330 | wings apart-like homolog                                       | WAPAL        | wings apart-like homolog (Drosophila)         | Nucleus         | other                   | 9        | 10       | 8        | 11         | 8          | 10         | 0.22  | 0.29907 |
| IPI00657953 | triple functional domain                                       | TRIO         | triple functional domain (PTPRF interactin    | Plasma Membrane | kinase                  | 8        | 9        | 10       | 11         | 8          | 10         | 0.22  | 0.29907 |
| IPI00221106 | splicing factor 3B subunit 2                                   | SF3B2        | splicing factor 3b, subunit 2, 145kDa         | Nucleus         | other                   | 13       | 9        | 8        | 12         | 4          | 12         | -0.22 | 0.30011 |
| IPI00643352 | nucleoporin 214kDa                                             | NUP214       | nucleoporin 214kDa                            | Nucleus         | transporter             | 9        | 9        | 12       | 8          | 8          | 16         | 0.21  | 0.30260 |
| IPI00179953 | Isoform 1 of Nuclear autoantigenic sperm protein               | NASP         | nuclear autoantigenic sperm protein (hist     | Nucleus         | other                   | 15       | 9        | 9        | 13         | 10         | 8          | -0.21 | 0.30352 |
| IPI00008998 | HSPC121                                                        | PTPLAD1      | protein tyrosine phosphatase-like A dom       | Cytoplasm       | other                   | 11       | 13       | 14       | 14         | 11         | 11         | -0.20 | 0.30747 |
| IPI00170596 | Paired amphipathic helix protein Sin3a                         | SIN3A        | SIN3 transcription regulator homolog A (      | Nucleus         | transcription regulator | 10       | 13       | 12       | 13         | 11         | 13         | 0.21  | 0.30749 |

**Supplemental Table 1. A list of all phosphorylated proteins identified in SNU216 and SNU216-LR.**

| Accession   | Identified Proteins                                                   | Symbol        | Entrez Gene Name                                           | Location        | Type(s)                    | SNU216-1 | SNU216-2 | SNU216-3 | SNU216-LR1 | SNU216-LR2 | SNU216-LR3 | STN   | p-value |
|-------------|-----------------------------------------------------------------------|---------------|------------------------------------------------------------|-----------------|----------------------------|----------|----------|----------|------------|------------|------------|-------|---------|
| IPI0000192  | Isoform F of SON protein                                              | SON           | SON DNA binding protein                                    | Nucleus         | other                      | 15       | 13       | 11       | 17         | 10         | 10         | -0.20 | 0.30825 |
| IPI00300384 | Receptor tyrosine-protein kinase erbB-2 precursor                     | ERBB2         | v-erb-b2 erythroblastic leukemia viral onc                 | Plasma Membrane | kinase                     | 14       | 12       | 14       | 12         | 12         | 14         | -0.20 | 0.30902 |
| IPI00022624 | Retinoic acid-induced protein 3                                       | GPRCSA        | G protein-coupled receptor, family C, group 5              | Plasma Membrane | G-protein coupled receptor | 16       | 14       | 12       | 15         | 14         | 11         | -0.20 | 0.31023 |
| IPI00401282 | PREDICTED: hypothetical protein LOC23307                              | FKBP15        | FK506 binding protein 15, 133kDa                           | Plasma Membrane | enzyme                     | 12       | 14       | 13       | 12         | 14         | 15         | 0.20  | 0.31053 |
| IPI00260388 | PHD finger protein 2                                                  | PHF2          | PHD finger protein 2                                       | Nucleus         | other                      | 16       | 19       | 13       | 20         | 14         | 16         | 0.19  | 0.31398 |
| IPI00604517 | 74 kDa protein                                                        | NCL           | nucleolin                                                  | Nucleus         | other                      | 18       | 17       | 20       | 22         | 18         | 13         | -0.19 | 0.31422 |
| IPI00418313 | Isoform 4 of Interleukin enhancer-binding factor 3                    | ILF3          | interleukin enhancer binding factor 3, 90kDa               | Nucleus         | transcription regulator    | 28       | 23       | 16       | 19         | 26         | 20         | -0.18 | 0.31605 |
| IPI00395337 | Isoform 1 of Pre-mRNA 3'-end-processing factor FIP1                   | FIP1L1        | FIP1 like 1 (S. cerevisiae)                                | Nucleus         | other                      | 17       | 23       | 21       | 21         | 22         | 20         | 0.18  | 0.31679 |
| IPI0002286  | Ankyrin repeat domain-containing protein 11                           | ANKRD11       | ankyrin repeat domain 11                                   | Nucleus         | other                      | 0        | 0        | 0        | 2          | 0          | 0          | 0.17  | 0.32019 |
| IPI00002549 | Isoform 1 of Anaphase-promoting complex subunit 2                     | ANAPC2        | anaphase promoting complex subunit 2                       | Nucleus         | enzyme                     | 0        | 0        | 0        | 2          | 0          | 0          | 0.17  | 0.32019 |
| IPI00004399 | ERBB receptor feedback inhibitor 1                                    | ERRFI1        | ERBB receptor feedback inhibitor 1                         | Cytoplasm       | other                      | 0        | 0        | 0        | 0          | 0          | 2          | 0.17  | 0.32019 |
| IPI0005087  | Tropomodulin-3                                                        | TMOD3         | tropomodulin 3 (ubiquitous)                                | Cytoplasm       | other                      | 0        | 0        | 0        | 2          | 0          | 1          | 0.17  | 0.32019 |
| IPI00005146 | Hypothetical protein A-362G6.1                                        | KIAA0430      | KIAA0430                                                   | unknown         | other                      | 0        | 0        | 0        | 2          | 0          | 0          | 0.17  | 0.32019 |
| IPI00005490 | Golgi phosphoprotein 3                                                | GOLPH3        | golgi phosphoprotein 3 (coat-protein)                      | Cytoplasm       | other                      | 0        | 0        | 0        | 2          | 0          | 0          | 0.17  | 0.32019 |
| IPI00005578 | EH-domain-containing protein 4                                        | EHD4          | EH-domain containing 4                                     | Plasma Membrane | enzyme                     | 0        | 0        | 0        | 0          | 2          | 0          | 0.17  | 0.32019 |
| IPI00010252 | Isoform Alpha of Transcription intermediary factor 1-gamma            | TRIM33        | tripartite motif containing 33                             | Nucleus         | transcription regulator    | 0        | 0        | 0        | 2          | 0          | 0          | 0.17  | 0.32019 |
| IPI00012074 | Heterogeneous nuclear ribonucleoprotein R                             | HNRNPR        | heterogeneous nuclear ribonucleoprotein                    | Nucleus         | other                      | 0        | 0        | 0        | 0          | 0          | 2          | 0.17  | 0.32019 |
| IPI00012149 | U3 small nucleolar ribonucleoprotein protein MPP10                    | MPHOSPH10     | M-phase phosphoprotein 10 (U3 small nucleolar)             | Nucleus         | other                      | 1        | 1        | 1        | 2          | 0          | 1          | 0.17  | 0.32019 |
| IPI00012669 | Hypothetical protein DKFZp564H1322                                    | SMG9          | smg-9 homolog, nonsense mediated mRNA decay                | Cytoplasm       | other                      | 0        | 0        | 0        | 0          | 2          | 0          | 0.17  | 0.32019 |
| IPI00013068 | Eukaryotic translation initiation factor 3 subunit 6                  | EIF3E         | eukaryotic translation initiation factor 3, subunit 6      | Cytoplasm       | translation regulator      | 1        | 1        | 0        | 1          | 2          | 0          | 0.17  | 0.32019 |
| IPI00013184 | N-terminal acetyltransferase complex ARD1 subunit homolog A           | NAA10         | N(alpha)-acetyltransferase 10, NatA catalytic subunit      | Nucleus         | enzyme                     | 1        | 1        | 0        | 0          | 1          | 2          | 0.17  | 0.32019 |
| IPI00013215 | Origin recognition complex subunit 1                                  | ORC1          | origin recognition complex, subunit 1                      | Nucleus         | other                      | 0        | 0        | 0        | 0          | 2          | 0          | 0.17  | 0.32019 |
| IPI00013269 | Isoform 1 of Protein C6orf106                                         | C6orf106      | chromosome 6 open reading frame 106                        | unknown         | other                      | 0        | 0        | 0        | 0          | 0          | 2          | 0.17  | 0.32019 |
| IPI00013485 | 40S ribosomal protein S2                                              | RPS2          | ribosomal protein S2                                       | Cytoplasm       | other                      | 0        | 0        | 0        | 2          | 0          | 1          | 0.17  | 0.32019 |
| IPI00013894 | Stress-induced-phosphoprotein 1                                       | STIP1         | stress-induced-phosphoprotein 1                            | Cytoplasm       | other                      | 0        | 0        | 0        | 2          | 1          | 0          | 0.17  | 0.32019 |
| IPI00014197 | Hypothetical protein                                                  | CDV3          | CDV3 homolog (mouse)                                       | unknown         | other                      | 1        | 0        | 1        | 2          | 0          | 0          | 0.17  | 0.32019 |
| IPI00014376 | RAB31, member RAS oncogene family variant                             | RAB31         | RAB31, member RAS oncogene family                          | Cytoplasm       | enzyme                     | 0        | 0        | 0        | 1          | 2          | 1          | 0.17  | 0.32019 |
| IPI00016802 | NAD-dependent deacetylase sirtuin-1                                   | SIRT1         | sirtuin 1                                                  | Nucleus         | transcription regulator    | 0        | 0        | 0        | 0          | 2          | 0          | 0.17  | 0.32019 |
| IPI00017648 | Lactase-phlorizin hydrolase precursor                                 | LCT           | lactase                                                    | Plasma Membrane | enzyme                     | 0        | 0        | 0        | 2          | 0          | 0          | 0.17  | 0.32019 |
| IPI00019471 | Insulin receptor substrate 1                                          | IRS1          | insulin receptor substrate 1                               | Cytoplasm       | enzyme                     | 0        | 0        | 0        | 0          | 2          | 0          | 0.17  | 0.32019 |
| IPI00020546 | Ash1                                                                  | ASH1L         | ash1 (absent, small, or homeotic)-like (Drosophila)        | Nucleus         | transcription regulator    | 0        | 0        | 0        | 0          | 0          | 2          | 0.17  | 0.32019 |
| IPI00020898 | Ribosomal protein S6 kinase alpha-3                                   | RPS6KA3       | ribosomal protein S6 kinase, 90kDa, polypeptide chain 3    | Cytoplasm       | kinase                     | 0        | 0        | 0        | 2          | 0          | 0          | 0.17  | 0.32019 |
| IPI00020928 | Transcription factor A, mitochondrial precursor                       | TFAM          | transcription factor A, mitochondrial                      | Cytoplasm       | transcription regulator    | 0        | 0        | 0        | 0          | 0          | 2          | 0.17  | 0.32019 |
| IPI00023004 | Eukaryotic translation initiation factor 1A, Y-chromosomal            | E1F1AY        | eukaryotic translation initiation factor 1A, Y-chromosomal | Cytoplasm       | translation regulator      | 1        | 0        | 0        | 1          | 2          | 1          | 0.17  | 0.32019 |
| IPI00028071 | Isoform Long of Dual specificity protein kinase CLK2                  | CLK2          | CDC-like kinase 2                                          | Nucleus         | kinase                     | 0        | 0        | 0        | 0          | 2          | 0          | 0.17  | 0.32019 |
| IPI00029054 | Cytosolic purine 5'-nucleotidase                                      | NT5C2         | 5'-nucleotidase, cytosolic II                              | Cytoplasm       | phosphatase                | 0        | 0        | 1        | 1          | 0          | 2          | 0.17  | 0.32019 |
| IPI00030876 | Protein diaphanous homolog 1                                          | DIAPH1        | diaphanous homolog 1 (Drosophila)                          | Cytoplasm       | other                      | 0        | 0        | 0        | 0          | 2          | 0          | 0.17  | 0.32019 |
| IPI00031563 | Hypothetical protein DDA1                                             | DDA1          | DET1 and DDB1 associated 1                                 | unknown         | other                      | 0        | 0        | 0        | 0          | 0          | 2          | 0.17  | 0.32019 |
| IPI00032358 | Nuclear envelope pore membrane protein POM 121                        | POM121/POM122 | POM121 membrane glycoprotein                               | Nucleus         | other                      | 0        | 0        | 0        | 0          | 0          | 2          | 0.17  | 0.32019 |
| IPI00032936 | ETS domain-containing transcription factor ERF                        | ERF           | Ets2 repressor factor                                      | Nucleus         | transcription regulator    | 0        | 0        | 0        | 2          | 0          | 0          | 0.17  | 0.32019 |
| IPI00032971 | Oxysterol-binding protein-related protein 10                          | OSBPL10       | oxysterol binding protein-like 10                          | unknown         | other                      | 0        | 0        | 0        | 0          | 2          | 0          | 0.17  | 0.32019 |
| IPI00034006 | Tyrosine-protein phosphatase non-receptor type 23                     | PTPN23        | protein tyrosine phosphatase, non-receptor type 23         | Cytoplasm       | phosphatase                | 1        | 1        | 0        | 1          | 1          | 2          | 0.17  | 0.32019 |
| IPI00043565 | Coiled-coil domain-containing protein 16                              | ZNF830        | zinc finger protein 830                                    | Nucleus         | other                      | 0        | 0        | 1        | 2          | 0          | 0          | 0.17  | 0.32019 |
| IPI00059242 | Synapse-associated protein 1                                          | SYAP1         | synapse associated protein 1                               | Nucleus         | other                      | 1        | 1        | 0        | 1          | 2          | 1          | 0.17  | 0.32019 |
| IPI00069084 | Isoform 1 of Transformation/transcription domain-associated protein 1 | TRRAP         | transformation/transcription domain-associated protein 1   | Nucleus         | transcription regulator    | 0        | 1        | 0        | 2          | 0          | 0          | 0.17  | 0.32019 |
| IPI00070943 | Isoform 1 of Phosphatidylinositol 4-kinase alpha                      | PI4KA         | phosphatidylinositol 4-kinase, catalytic, alpha            | Cytoplasm       | kinase                     | 0        | 0        | 0        | 2          | 0          | 0          | 0.17  | 0.32019 |
| IPI00099834 | Ubinuclein                                                            | UBN1          | ubinnuclein 1                                              | Nucleus         | transcription regulator    | 0        | 0        | 0        | 2          | 0          | 0          | 0.17  | 0.32019 |
| IPI00101049 | NMD3 homolog                                                          | NMD3          | NMD3 homolog (S. cerevisiae)                               | Nucleus         | other                      | 1        | 0        | 0        | 2          | 1          | 0          | 0.17  | 0.32019 |
| IPI00102173 | Ubiquitin-conjugating enzyme E2 E2                                    | UBE2E2        | ubiquitin-conjugating enzyme E2E 2                         | Cytoplasm       | enzyme                     | 1        | 1        | 1        | 0          | 0          | 2          | 0.17  | 0.32019 |
| IPI00102575 | ATP(GTP)-binding protein                                              | ATAD5         | ATPase family, AAA domain containing 5                     | unknown         | other                      | 0        | 0        | 0        | 0          | 0          | 2          | 0.17  | 0.32019 |
| IPI00141933 | Mitotic checkpoint serine/threonine-protein kinase BUB1 beta          | BUB1B         | budding uninhibited by benzimidazoles 1 beta               | Nucleus         | kinase                     | 0        | 0        | 0        | 2          | 0          | 0          | 0.17  | 0.32019 |
| IPI00152001 | Isoform Alpha of Tripartite motif protein 3                           | TRIM3         | tripartite motif containing 3                              | Cytoplasm       | other                      | 0        | 0        | 0        | 2          | 0          | 0          | 0.17  | 0.32019 |
| IPI00157643 | Isoform 3 of Transcription factor III B 90 kDa subunit                | BRF1          | (include BRF1 homolog, subunit of RNA polymerase II)       | Nucleus         | transcription regulator    | 0        | 0        | 0        | 2          | 0          | 0          | 0.17  | 0.32019 |
| IPI00160131 | Myosin-Ixa                                                            | MYO9A         | myosin IXA                                                 | Cytoplasm       | enzyme                     | 0        | 0        | 0        | 0          | 2          | 0          | 0.17  | 0.32019 |

**Supplemental Table 1. A list of all phosphorylated proteins identified in SNU216 and SNU216-LR.**

| Accession   | Identified Proteins                                                   | Symbol   | Entrez Gene Name                                               | Location            | Type(s)                 | SNU216-1 | SNU216-2 | SNU216-3 | SNU216-LR1 | SNU216-LR2 | SNU216-LR3 | STN   | p-value |
|-------------|-----------------------------------------------------------------------|----------|----------------------------------------------------------------|---------------------|-------------------------|----------|----------|----------|------------|------------|------------|-------|---------|
| IPI00165138 | GRIP and coiled-coil domain-containing protein 1                      | GCC1     | GRIP and coiled-coil domain containing 1                       | Cytoplasm           | other                   | 0        | 0        | 0        | 0          | 0          | 2          | 0.17  | 0.32019 |
| IPI00165171 | DGCR14 protein                                                        | DGCR14   | DiGeorge syndrome critical region gene 1                       | Nucleus             | other                   | 0        | 0        | 1        | 0          | 0          | 2          | 0.17  | 0.32019 |
| IPI00166555 | Chromosome 13 open reading frame 10                                   | RBM26    | RNA binding motif protein 26                                   | unknown             | other                   | 1        | 0        | 0        | 0          | 0          | 2          | 0.17  | 0.32019 |
| IPI00170643 | Isoform 2 of Histone-lysine N-methyltransferase, H3 lysine-79 sp      | DOT1L    | DOT1-like, histone H3 methyltransferase 1                      | Nucleus             | phosphatase             | 0        | 0        | 0        | 0          | 2          | 1          | 0.17  | 0.32019 |
| IPI00170935 | Leucine-rich repeat-containing protein 47                             | LRRC47   | leucine rich repeat containing 47                              | unknown             | other                   | 0        | 0        | 0        | 1          | 2          | 0          | 0.17  | 0.32019 |
| IPI00172590 | 69 kDa protein                                                        |          |                                                                |                     |                         | 1        | 0        | 0        | 1          | 2          | 0          | 0.17  | 0.32019 |
| IPI00173346 | Phosphoglucosyltransferase-2-like 1                                   | PGM2L1   | phosphoglucosyltransferase 2-like 1                            | Cytoplasm           | enzyme                  | 0        | 1        | 0        | 2          | 0          | 0          | 0.17  | 0.32019 |
| IPI00176398 | Isoform 1 of SLIT and NTRK-like protein 6 precursor                   | SLITRK6  | SLIT and NTRK-like family, member 6                            | unknown             | other                   | 0        | 0        | 0        | 0          | 2          | 0          | 0.17  | 0.32019 |
| IPI00178150 | Isoform 1 of Chromosome-associated kinesin KIF4A                      | KIF4A    | kinesin family member 4A                                       | Nucleus             | other                   | 0        | 0        | 1        | 2          | 0          | 0          | 0.17  | 0.32019 |
| IPI00178185 | Isoform 1 of Cytoskeleton-like bicaudal D protein homolog 2           | BICD2    | bicaudal D homolog 2 (Drosophila)                              | Cytoplasm           | other                   | 0        | 0        | 0        | 0          | 2          | 0          | 0.17  | 0.32019 |
| IPI00181283 | Similar to phospholipase C, beta 3 (Fragment)                         | PLCB3    | phospholipase C, beta 3 (phosphatidylinositol)                 | Cytoplasm           | enzyme                  | 1        | 0        | 1        | 2          | 0          | 0          | 0.17  | 0.32019 |
| IPI00184821 | Bifunctional coenzyme A synthase                                      | COASY    | CoA synthase                                                   | Cytoplasm           | kinase                  | 1        | 1        | 0        | 0          | 1          | 2          | 0.17  | 0.32019 |
| IPI00184997 | Full-length cDNA clone CS0DH002YN05 of T cells (Fragment)             | DLGAP5   | discs, large (Drosophila) homolog-associated 5                 | Nucleus             | phosphatase             | 0        | 0        | 0        | 2          | 0          | 0          | 0.17  | 0.32019 |
| IPI00185326 | Isoform 1 of JmjC domain-containing histone demethylation protein 1   | KDM2B    | lysine (K)-specific demethylase 2B                             | Nucleus             | other                   | 0        | 0        | 0        | 0          | 2          | 0          | 0.17  | 0.32019 |
| IPI00217797 | C1orf174 protein (Fragment)                                           | C1orf174 | chromosome 1 open reading frame 174                            | unknown             | other                   | 0        | 0        | 0        | 2          | 0          | 0          | 0.17  | 0.32019 |
| IPI00217882 | Sortilin precursor                                                    | SORT1    | sortilin 1                                                     | Cytoplasm           | transporter             | 0        | 0        | 0        | 2          | 0          | 0          | 0.17  | 0.32019 |
| IPI00218775 | FK506-binding protein 5                                               | FKBP5    | FK506 binding protein 5                                        | Nucleus             | enzyme                  | 0        | 0        | 0        | 2          | 0          | 0          | 0.17  | 0.32019 |
| IPI00218982 | Breast cancer type 1 susceptibility protein                           | BRCA1    | breast cancer 1, early onset                                   | Nucleus             | transcription regulator | 0        | 0        | 0        | 2          | 0          | 0          | 0.17  | 0.32019 |
| IPI00219352 | cystathionine-beta-synthase                                           | CBS      | cystathionine-beta-synthase                                    | Cytoplasm           | enzyme                  | 0        | 1        | 0        | 2          | 1          | 0          | 0.17  | 0.32019 |
| IPI00234154 | similar to RIKEN cDNA 5730467H21                                      | ANKRD56  | ankyrin repeat domain 56                                       | Nucleus             | transcription regulator | 0        | 0        | 0        | 0          | 2          | 0          | 0.17  | 0.32019 |
| IPI00247674 | PREDICTED: hypothetical protein XP_292820                             | PALM3    | paralemmin 3                                                   | unknown             | other                   | 0        | 0        | 0        | 0          | 2          | 0          | 0.17  | 0.32019 |
| IPI00289584 | RING finger protein 139                                               | RNF139   | ring finger protein 139                                        | Cytoplasm           | enzyme                  | 0        | 0        | 0        | 2          | 0          | 0          | 0.17  | 0.32019 |
| IPI00290547 | E14 protein                                                           | NPAT     | nuclear protein, ataxia-telangiectasia loci                    | Nucleus             | transcription regulator | 0        | 1        | 0        | 2          | 0          | 0          | 0.17  | 0.32019 |
| IPI00291922 | Proteasome subunit alpha type 5                                       | PSMA5    | proteasome (prosome, macropain) subunit alpha type 5           | Cytoplasm           | peptidase               | 1        | 1        | 1        | 1          | 2          | 0          | 0.17  | 0.32019 |
| IPI00292000 | Isoform 1 of U4/U6 small nuclear ribonucleoprotein Prp31              | PRPF31   | PRP31 pre-mRNA processing factor 31                            | Nucleus             | other                   | 0        | 1        | 1        | 2          | 1          | 1          | 0.17  | 0.32019 |
| IPI00292326 | Sperm-associated antigen 1                                            | SPAG1    | sperm associated antigen 1                                     | Cytoplasm           | other                   | 0        | 0        | 0        | 2          | 0          | 0          | 0.17  | 0.32019 |
| IPI00292537 | nuclear factor kappa-B, subunit 1                                     | NFKB1    | nuclear factor of kappa light polypeptide chain epsilon 1      | Nucleus             | transcription regulator | 0        | 0        | 0        | 2          | 0          | 0          | 0.17  | 0.32019 |
| IPI00294962 | Isoform 1 of SH3-domain kinase-binding protein 1                      | SH3KBP1  | SH3-domain kinase binding protein 1                            | Cytoplasm           | other                   | 0        | 0        | 0        | 2          | 0          | 0          | 0.17  | 0.32019 |
| IPI00298949 | Cyclin G-associated kinase                                            | GAK      | cyclin G associated kinase                                     | Nucleus             | kinase                  | 1        | 1        | 1        | 2          | 0          | 1          | 0.17  | 0.32019 |
| IPI00299507 | Condensin complex subunit 2                                           | NCAPH    | non-SMC condensin I complex, subunit H                         | Nucleus             | other                   | 0        | 0        | 0        | 2          | 0          | 0          | 0.17  | 0.32019 |
| IPI00301465 | hypothetical protein LOC55355                                         | HUJRP    | Holliday junction recognition protein                          | Nucleus             | other                   | 0        | 0        | 0        | 2          | 0          | 0          | 0.17  | 0.32019 |
| IPI00304379 | Ubiquitin carboxyl-terminal hydrolase 1                               | USP1     | ubiquitin specific peptidase 1                                 | Cytoplasm           | peptidase               | 1        | 0        | 1        | 2          | 0          | 0          | 0.17  | 0.32019 |
| IPI00304866 | Tumor necrosis factor, alpha-induced protein 2                        | TNFAIP2  | tumor necrosis factor, alpha-induced protein 2                 | Extracellular Space | other                   | 0        | 0        | 0        | 2          | 0          | 0          | 0.17  | 0.32019 |
| IPI00305305 | Signal-induced proliferation-associated protein 1                     | SIPA1    | signal-induced proliferation-associated 1                      | Cytoplasm           | other                   | 0        | 0        | 0        | 0          | 0          | 2          | 0.17  | 0.32019 |
| IPI00306265 | A kinase anchor protein 10, mitochondrial precursor                   | AKAP10   | A kinase (PRKA) anchor protein 10                              | Cytoplasm           | other                   | 0        | 0        | 0        | 0          | 2          | 0          | 0.17  | 0.32019 |
| IPI00328089 | Kappa B and V(D)J recombination signal sequences binding protein 1    | HIVEP3   | human immunodeficiency virus type 1 enhancer binding protein 3 | Nucleus             | transcription regulator | 0        | 0        | 0        | 0          | 2          | 0          | 0.17  | 0.32019 |
| IPI00333420 | Serine/threonine-protein kinase SRPK2                                 | SRPK2    | SRSF protein kinase 2                                          | Nucleus             | kinase                  | 1        | 0        | 1        | 1          | 2          | 1          | 0.17  | 0.32019 |
| IPI00384529 | Hypothetical protein DKFZp547K059                                     | COBL     | cordons-bleu homolog (mouse)                                   | unknown             | other                   | 0        | 0        | 0        | 2          | 0          | 0          | 0.17  | 0.32019 |
| IPI00384569 | Hypothetical protein KIAA1685                                         | ASXL2    | additional sex combs like 2 (Drosophila)                       | unknown             | other                   | 0        | 0        | 0        | 0          | 0          | 2          | 0.17  | 0.32019 |
| IPI00386898 | CDNA FLJ12346 fis, clone MAMMA1002297, highly similar to Hs           | RABGAP1  | RAB GTPase activating protein 1                                | Cytoplasm           | other                   | 0        | 0        | 0        | 2          | 0          | 0          | 0.17  | 0.32019 |
| IPI00396145 | FYVE finger-containing phosphoinositide kinase                        | PIKFYVE  | phosphoinositide kinase, FYVE finger containing 1              | Cytoplasm           | kinase                  | 0        | 0        | 0        | 0          | 0          | 2          | 0.17  | 0.32019 |
| IPI00442150 | CDNA FLJ16420 fis, clone BRACE3003053. (Fragment)                     | SETD2    | SET domain containing 2                                        | Cytoplasm           | enzyme                  | 0        | 0        | 0        | 2          | 1          | 0          | 0.17  | 0.32019 |
| IPI00453473 | Histone H4                                                            |          |                                                                |                     |                         | 0        | 0        | 0        | 2          | 0          | 1          | 0.17  | 0.32019 |
| IPI00465132 | Coatamer subunit epsilon                                              | COPE     | coatamer protein complex, subunit epsilon                      | Cytoplasm           | transporter             | 0        | 0        | 0        | 2          | 0          | 1          | 0.17  | 0.32019 |
| IPI00477825 | Isoform 1 of Mesoderm induction early response protein 1              | MIER1    | mesoderm induction early response 1 homolog 1                  | Nucleus             | other                   | 0        | 0        | 0        | 2          | 0          | 0          | 0.17  | 0.32019 |
| IPI00477982 | ribosomal protein S6 kinase, 90kDa, polypeptide 1 isoform b           | RPS6KA1  | ribosomal protein S6 kinase, 90kDa, polypeptide 1              | Cytoplasm           | kinase                  | 1        | 1        | 1        | 2          | 0          | 0          | 0.17  | 0.32019 |
| IPI00478127 | Transcription elongation factor A protein-like 3                      | TCEAL3   | transcription elongation factor A (SII)-like 3                 | unknown             | other                   | 0        | 0        | 0        | 0          | 0          | 2          | 0.17  | 0.32019 |
| IPI00550821 | Isoform 1 of Cleavage and polyadenylation specificity factor 7        | CPSF7    | cleavage and polyadenylation specificity factor 7              | Nucleus             | other                   | 1        | 0        | 1        | 1          | 1          | 2          | 0.17  | 0.32019 |
| IPI00658093 | 61 kDa protein                                                        | MEN1     | multiple endocrine neoplasia 1                                 | Nucleus             | transcription regulator | 0        | 0        | 0        | 0          | 2          | 0          | 0.17  | 0.32019 |
| IPI00719015 | Isoform 2 of Dedicator of cytokinesis protein 9                       | DOCK9    | dedicator of cytokinesis 9                                     | Cytoplasm           | other                   | 0        | 0        | 0        | 0          | 2          | 1          | 0.17  | 0.32019 |
| IPI00736672 | Isoform 3 of Quaking protein                                          | QKI      | QKI, KH domain containing, RNA binding protein 1               | Nucleus             | other                   | 0        | 0        | 0        | 2          | 0          | 1          | 0.17  | 0.32019 |
| IPI00745557 | ankyrin repeat domain protein 17 isoform a                            | ANKRD17  | ankyrin repeat domain 17                                       | unknown             | other                   | 0        | 1        | 0        | 0          | 2          | 0          | 0.17  | 0.32019 |
| IPI00748891 | 26 kDa protein                                                        | FAM177A1 | family with sequence similarity 177, member A1                 | unknown             | other                   | 1        | 1        | 0        | 2          | 0          | 0          | 0.17  | 0.32019 |
| IPI00000690 | Isoform 1 of Programmed cell death protein 8, mitochondrial precursor | AIFM1    | apoptosis-inducing factor, mitochondrion-associated 1          | Cytoplasm           | enzyme                  | 2        | 0        | 0        | 0          | 0          | 0          | -0.17 | 0.34309 |

**Supplemental Table 1. A list of all phosphorylated proteins identified in SNU216 and SNU216-LR.**

| Accession   | Identified Proteins                                                | Symbol        | Entrez Gene Name                           | Location        | Type(s)                 | SNU216-1 | SNU216-2 | SNU216-3 | SNU216-LR1 | SNU216-LR2 | SNU216-LR3 | STN   | p-value |
|-------------|--------------------------------------------------------------------|---------------|--------------------------------------------|-----------------|-------------------------|----------|----------|----------|------------|------------|------------|-------|---------|
| IPI00000692 | Chloride intracellular channel protein 3                           | CLIC3         | chloride intracellular channel 3           | Nucleus         | ion channel             | 0        | 2        | 0        | 0          | 0          | 0          | -0.17 | 0.34309 |
| IPI00000897 | Probable helicase with zinc-finger domain                          | HELZ          | helicase with zinc finger                  | Nucleus         | enzyme                  | 0        | 2        | 0        | 0          | 0          | 0          | -0.17 | 0.34309 |
| IPI00001893 | Isoform A of Protocadherin-7 precursor                             | PCDH7         | protocadherin 7                            | Plasma Membrane | other                   | 2        | 0        | 0        | 0          | 0          | 0          | -0.17 | 0.34309 |
| IPI00005264 | Isoform 2 of Plakophilin-2                                         | PKP2 (include | plakophilin 2                              | Plasma Membrane | other                   | 1        | 0        | 2        | 0          | 0          | 0          | -0.17 | 0.34309 |
| IPI00006280 | SREBP cleavage-activating protein                                  | SCAP          | SREBF chaperone                            | Cytoplasm       | other                   | 0        | 2        | 0        | 0          | 0          | 0          | -0.17 | 0.34309 |
| IPI00006900 | Something about silencing protein 10                               | UTP3          | UTP3, small subunit (SSU) processome co    | Nucleus         | other                   | 2        | 1        | 1        | 1          | 1          | 1          | -0.17 | 0.34309 |
| IPI00007208 | Probable ATP-dependent RNA helicase DDX41                          | DDX41         | DEAD (Asp-Glu-Ala-Asp) box polypeptide     | Nucleus         | enzyme                  | 2        | 0        | 0        | 0          | 1          | 1          | -0.17 | 0.34309 |
| IPI00010486 | Isoform 1 of Hermansky-Pudlak syndrome 5 protein                   | HPS5          | Hermansky-Pudlak syndrome 5                | Cytoplasm       | other                   | 0        | 0        | 2        | 0          | 0          | 0          | -0.17 | 0.34309 |
| IPI00011118 | Ribonucleoside-diphosphate reductase M2 subunit                    | RRM2          | ribonucleotide reductase M2                | Nucleus         | enzyme                  | 1        | 2        | 0        | 0          | 0          | 0          | -0.17 | 0.34309 |
| IPI00011938 | Isoform 1 of Adenylate cyclase type 6                              | ADCY6         | adenylate cyclase 6                        | Plasma Membrane | enzyme                  | 2        | 0        | 0        | 0          | 0          | 0          | -0.17 | 0.34309 |
| IPI00012998 | Isoform 1 of Cleavage and polyadenylation specificity factor 6     | CPSF6         | cleavage and polyadenylation specific fac  | Nucleus         | other                   | 2        | 1        | 0        | 1          | 0          | 0          | -0.17 | 0.34309 |
| IPI00013905 | 5'-AMP-activated protein kinase subunit beta-2                     | PRKAB2        | protein kinase, AMP-activated, beta 2 nor  | Cytoplasm       | kinase                  | 2        | 0        | 0        | 1          | 0          | 0          | -0.17 | 0.34309 |
| IPI00016387 | pre-mRNA cleavage complex II protein Pcf11                         | PCF11 (huma   | PCF11, cleavage and polyadenylation fact   | Nucleus         | other                   | 0        | 0        | 2        | 0          | 1          | 1          | -0.17 | 0.34309 |
| IPI00019004 | Translocation protein SEC62                                        | SEC62 (includ | SEC62 homolog (S. cerevisiae)              | Cytoplasm       | transporter             | 2        | 0        | 0        | 0          | 0          | 0          | -0.17 | 0.34309 |
| IPI00020567 | Rho-GTPase-activating protein 1                                    | ARHGAP1       | Rho GTPase activating protein 1            | Cytoplasm       | other                   | 1        | 1        | 2        | 0          | 1          | 1          | -0.17 | 0.34309 |
| IPI00021167 | Isoform 1 of Interferon-inducible double stranded RNA-depende      | PRKRA         | protein kinase, interferon-inducible doubl | Cytoplasm       | other                   | 0        | 2        | 0        | 0          | 0          | 0          | -0.17 | 0.34309 |
| IPI00021701 | KIAA0433 protein (Fragment)                                        | PIIP5K2       | diphosphoinositol pentakisphosphate kin    | Cytoplasm       | other                   | 2        | 0        | 1        | 0          | 0          | 0          | -0.17 | 0.34309 |
| IPI00022095 | paternally expressed 10 isoform RF1/2                              | PEG10         | paternally expressed 10                    | Nucleus         | other                   | 0        | 2        | 0        | 0          | 0          | 0          | -0.17 | 0.34309 |
| IPI00025202 | Isoform 2 of Formin-like 1 protein                                 | FMNL1         | formin-like 1                              | Cytoplasm       | other                   | 2        | 0        | 0        | 0          | 0          | 0          | -0.17 | 0.34309 |
| IPI00026625 | Isoform 1 of Nuclear pore complex protein Nup155                   | NUP155        | nucleoporin 155kDa                         | Nucleus         | transporter             | 0        | 2        | 1        | 0          | 0          | 0          | -0.17 | 0.34309 |
| IPI00026673 | Isoform 1 of Homeobox protein cut-like 1                           | CUX1          | cut-like homeobox 1                        | Nucleus         | transcription regulator | 0        | 0        | 2        | 1          | 0          | 0          | -0.17 | 0.34309 |
| IPI00029734 | Isoform 4 of M-phase inducer phosphatase 2                         | CDC25B        | cell division cycle 25 homolog B (S. pom   | Nucleus         | phosphatase             | 2        | 0        | 0        | 0          | 0          | 0          | -0.17 | 0.34309 |
| IPI00069694 | Isoform 1 of General transcription factor II-I repeat domain-cont  | GTF2IRD1      | GTF2I repeat domain containing 1           | Nucleus         | transcription regulator | 0        | 0        | 2        | 0          | 0          | 0          | -0.17 | 0.34309 |
| IPI00075080 | Isoform B of Oxysterol-binding protein-related protein 1           | OSBPL1A       | oxysterol binding protein-like 1A          | Cytoplasm       | other                   | 2        | 0        | 0        | 0          | 0          | 0          | -0.17 | 0.34309 |
| IPI00095032 | PREDICTED: hypothetical protein LOC146439                          | CCDC64B       | coiled-coil domain containing 64B          | Nucleus         | other                   | 2        | 1        | 0        | 0          | 0          | 0          | -0.17 | 0.34309 |
| IPI00100041 | Isoform 1 of Lethal(3)malignant brain tumor-like 2 protein         | L3MBTL2       | l(3)mbt-like 2 (Drosophila)                | Nucleus         | transcription regulator | 0        | 0        | 2        | 0          | 0          | 0          | -0.17 | 0.34309 |
| IPI00100798 | CASP8-associated protein 2                                         | CASP8AP2      | caspase 8 associated protein 2             | Nucleus         | transcription regulator | 0        | 2        | 0        | 0          | 0          | 0          | -0.17 | 0.34309 |
| IPI00102313 | steroid receptor RNA activator 1                                   | SRA1          | steroid receptor RNA activator 1           | Nucleus         | transcription regulator | 0        | 0        | 2        | 0          | 0          | 0          | -0.17 | 0.34309 |
| IPI00103731 | Jun dimerization protein 2                                         | JDP2          | Jun dimerization protein 2                 | Nucleus         | transcription regulator | 0        | 2        | 0        | 0          | 0          | 0          | -0.17 | 0.34309 |
| IPI00152658 | Serine/threonine-protein kinase Nek7                               | NEK7          | NIMA (never in mitosis gene a)-related ki  | Nucleus         | kinase                  | 0        | 2        | 0        | 0          | 0          | 0          | -0.17 | 0.34309 |
| IPI00162088 | Isoform 1 of TNF receptor-associated factor 4                      | TRAF4         | TNF receptor-associated factor 4           | Cytoplasm       | other                   | 0        | 0        | 2        | 0          | 0          | 0          | -0.17 | 0.34309 |
| IPI00166153 | KIAA0082                                                           | FTSJD2        | FtsJ methyltransferase domain containing   | unknown         | enzyme                  | 0        | 2        | 1        | 0          | 0          | 0          | -0.17 | 0.34309 |
| IPI00167909 | EML3 protein                                                       | EML3          | echinoderm microtubule associated prote    | unknown         | other                   | 0        | 2        | 0        | 0          | 0          | 0          | -0.17 | 0.34309 |
| IPI00168350 | CDNA FLJ90669 fis, clone PLACE1005519, moderately similar to       | MST4          | serine/threonine protein kinase MST4       | Nucleus         | kinase                  | 0        | 0        | 2        | 0          | 0          | 0          | -0.17 | 0.34309 |
| IPI00170979 | Isoform 2 of Ena/VASP-like protein                                 | EVL           | Enah/Vasp-like                             | Cytoplasm       | other                   | 2        | 0        | 0        | 0          | 0          | 0          | -0.17 | 0.34309 |
| IPI00172636 | calcium/calmodulin-dependent protein kinase II delta isoform 1     | CAMK2D        | calcium/calmodulin-dependent protein ki    | Cytoplasm       | kinase                  | 2        | 0        | 0        | 0          | 0          | 0          | -0.17 | 0.34309 |
| IPI00178352 | Isoform 1 of Filamin-C                                             | FLNC          | filamin C, gamma                           | Cytoplasm       | other                   | 0        | 2        | 1        | 0          | 1          | 1          | -0.17 | 0.34309 |
| IPI00179016 | Histone-lysine N-methyltransferase, H3 lysine-4 specific SET1      | SETD1A        | SET domain containing 1A                   | Nucleus         | ion channel             | 0        | 1        | 2        | 0          | 0          | 0          | -0.17 | 0.34309 |
| IPI00179757 | Kinesin-like protein KIF1C                                         | KIF1C         | kinesin family member 1C                   | Cytoplasm       | other                   | 0        | 0        | 2        | 0          | 0          | 0          | -0.17 | 0.34309 |
| IPI00180266 | WW domain-containing transcription regulator protein 1             | WWTR1         | WW domain containing transcription reg     | Nucleus         | transcription regulator | 0        | 2        | 0        | 0          | 0          | 0          | -0.17 | 0.34309 |
| IPI00180292 | Isoform 5 of Brain-specific angiogenesis inhibitor 1-associated pr | BAIAP2        | BAI1-associated protein 2                  | Plasma Membrane | kinase                  | 2        | 0        | 0        | 0          | 0          | 0          | -0.17 | 0.34309 |
| IPI00186008 | START domain containing 10                                         | STAR10        | StAR-related lipid transfer (START) domai  | Cytoplasm       | other                   | 0        | 0        | 0        | 0          | 0          | 0          | -0.17 | 0.34309 |
| IPI00215963 | hypothetical protein LOC23199                                      | KIAA0182      | KIAA0182                                   | unknown         | other                   | 2        | 0        | 0        | 0          | 0          | 0          | -0.17 | 0.34309 |
| IPI00216587 | 40S ribosomal protein S8                                           | RPS8          | ribosomal protein S8                       | Cytoplasm       | other                   | 0        | 2        | 0        | 0          | 1          | 0          | -0.17 | 0.34309 |
| IPI00217413 | DEAH (Asp-Glu-Ala-His) box polypeptide 29                          | DHX29         | DEAH (Asp-Glu-Ala-His) box polypeptide     | Cytoplasm       | enzyme                  | 0        | 2        | 0        | 0          | 1          | 0          | -0.17 | 0.34309 |
| IPI00218648 | Isoform III of AT-rich interactive domain-containing protein 4A    | ARID4A        | AT rich interactive domain 4A (RBP1-like)  | Nucleus         | transcription regulator | 0        | 1        | 2        | 1          | 0          | 0          | -0.17 | 0.34309 |
| IPI00220844 | Isoform 2 of Solute carrier family 12 member 2                     | SLC12A2       | solute carrier family 12 (sodium/potassiur | Plasma Membrane | transporter             | 0        | 0        | 2        | 0          | 0          | 0          | -0.17 | 0.34309 |
| IPI00289837 | PREDICTED: hypothetical protein LOC114800                          | CCDC85A       | coiled-coil domain containing 85A          | unknown         | other                   | 2        | 0        | 0        | 0          | 0          | 0          | -0.17 | 0.34309 |
| IPI00290562 | nuclear factor, interleukin 3 regulated                            | NFIL3         | nuclear factor, interleukin 3 regulated    | Nucleus         | transcription regulator | 0        | 0        | 2        | 0          | 0          | 0          | -0.17 | 0.34309 |
| IPI00291783 | Gem-associated protein 5                                           | GEMIN5        | gem (nuclear organelle) associated protei  | Nucleus         | other                   | 1        | 2        | 1        | 0          | 0          | 0          | -0.17 | 0.34309 |
| IPI00291796 | BTB (POZ) domain containing 12                                     | SLX4 (include | SLX4 structure-specific endonuclease sub   | Nucleus         | other                   | 0        | 2        | 0        | 0          | 0          | 0          | -0.17 | 0.34309 |
| IPI00294435 | step II splicing factor SLU7                                       | SLU7 (include | SLU7 splicing factor homolog (S. cerevisi  | Nucleus         | enzyme                  | 0        | 0        | 2        | 0          | 0          | 0          | -0.17 | 0.34309 |
| IPI00297251 | MGRN1 protein                                                      | MGRN1         | mahogunin, ring finger 1                   | Cytoplasm       | enzyme                  | 2        | 0        | 1        | 0          | 1          | 0          | -0.17 | 0.34309 |
| IPI00297910 | Tumor-associated calcium signal transducer 2 precursor             | TACSTD2       | tumor-associated calcium signal transduc   | Plasma Membrane | other                   | 1        | 2        | 0        | 0          | 1          | 1          | -0.17 | 0.34309 |

**Supplemental Table 1. A list of all phosphorylated proteins identified in SNU216 and SNU216-LR.**

| Accession   | Identified Proteins                                             | Symbol   | Entrez Gene Name                                   | Location            | Type(s)                 | SNU216-1 | SNU216-2 | SNU216-3 | SNU216-LR1 | SNU216-LR2 | SNU216-LR3 | STN   | p-value |
|-------------|-----------------------------------------------------------------|----------|----------------------------------------------------|---------------------|-------------------------|----------|----------|----------|------------|------------|------------|-------|---------|
| IPI00299033 | Importin alpha-3 subunit                                        | KPNA3    | karyopherin alpha 3 (importin alpha 4)             | Nucleus             | transporter             | 0        | 0        | 2        | 0          | 0          | 0          | -0.17 | 0.34309 |
| IPI00306929 | Isoform 1 of Myosin-18B                                         | MYO18B   | myosin XVIIIIB                                     | Cytoplasm           | other                   | 0        | 2        | 0        | 0          | 0          | 0          | -0.17 | 0.34309 |
| IPI00329573 | Isoform Long of Collagen alpha-1(XII) chain precursor           | COL12A1  | collagen, type XII, alpha 1                        | Extracellular Space | other                   | 0        | 2        | 0        | 0          | 0          | 0          | -0.17 | 0.34309 |
| IPI00374268 | Isoform 2 of Bromodomain-containing protein 9                   | BRD9     | bromodomain containing 9                           | unknown             | other                   | 2        | 0        | 0        | 0          | 0          | 0          | -0.17 | 0.34309 |
| IPI00383694 | D13S824E locus                                                  | MTMR6    | myotubularin related protein 6                     | Cytoplasm           | phosphatase             | 0        | 0        | 2        | 0          | 0          | 0          | -0.17 | 0.34309 |
| IPI00385022 | DEAH (Asp-Glu-Ala-His) box polypeptide 34 isoform 1             | DHX34    | DEAH (Asp-Glu-Ala-His) box polypeptide             | unknown             | enzyme                  | 2        | 1        | 1        | 0          | 0          | 0          | -0.17 | 0.34309 |
| IPI00385511 | Isoform 1 of Trinucleotide repeat-containing 6B protein         | TNRC6B   | trinucleotide repeat containing 6B                 | unknown             | other                   | 1        | 2        | 0        | 0          | 0          | 1          | -0.17 | 0.34309 |
| IPI00386208 | Gastric-associated differentially-expressed protein YA61P       |          |                                                    |                     |                         | 1        | 1        | 2        | 1          | 1          | 1          | -0.17 | 0.34309 |
| IPI00396057 | Isoform C of Protein C9orf10                                    | FAM120A  | family with sequence similarity 120A               | Cytoplasm           | other                   | 2        | 0        | 0        | 0          | 0          | 1          | -0.17 | 0.34309 |
| IPI00396071 | Isoform 1 of Retinoid X receptor-interacting protein 110        | UIMC1    | ubiquitin interaction motif containing 1           | Nucleus             | other                   | 2        | 0        | 0        | 0          | 0          | 0          | -0.17 | 0.34309 |
| IPI00397015 | Novel protein                                                   | AHDC1    | AT hook, DNA binding motif, containing             | unknown             | other                   | 2        | 0        | 0        | 0          | 0          | 0          | -0.17 | 0.34309 |
| IPI00397700 | Isoform 2 of PHD finger protein 6                               | PHF6     | PHD finger protein 6                               | Nucleus             | other                   | 0        | 0        | 2        | 0          | 0          | 0          | -0.17 | 0.34309 |
| IPI00398012 | Fragile site-associated protein                                 | KIAA1109 | KIAA1109                                           | unknown             | other                   | 2        | 0        | 0        | 0          | 0          | 0          | -0.17 | 0.34309 |
| IPI00410360 | Isoform 2 of Protein C14orf120                                  | NGDN     | neuroguidin, EIF4E binding protein                 | Nucleus             | other                   | 0        | 0        | 2        | 0          | 1          | 0          | -0.17 | 0.34309 |
| IPI00411356 | Vacuolar sorting protein 4a                                     | VPS4A    | vacuolar protein sorting 4 homolog A (S. Cytoplasm |                     | other                   | 0        | 2        | 0        | 0          | 0          | 0          | -0.17 | 0.34309 |
| IPI00413611 | DNA topoisomerase 1                                             | TOP1     | topoisomerase (DNA) I                              | Nucleus             | enzyme                  | 2        | 1        | 0        | 1          | 0          | 1          | -0.17 | 0.34309 |
| IPI00413942 | Isoform 1 of GRIP1-associated protein 1                         |          |                                                    |                     |                         | 2        | 0        | 1        | 0          | 0          | 0          | -0.17 | 0.34309 |
| IPI00438170 | Isoform 1 of Sorting nexin-12                                   | SNX12    | sorting nexin 12                                   | unknown             | transporter             | 2        | 1        | 0        | 1          | 0          | 1          | -0.17 | 0.34309 |
| IPI00444452 | Isoform 1 of Putative helicase MOV-10                           | MOV10    | Mov10, Moloney leukemia virus 10, homc             | Nucleus             | enzyme                  | 0        | 1        | 2        | 0          | 0          | 0          | -0.17 | 0.34309 |
| IPI00448465 | Isoform 1 of Ankyrin repeat domain-containing protein 12        | ANKRD12  | ankyrin repeat domain 12                           | Nucleus             | other                   | 2        | 0        | 0        | 0          | 0          | 0          | -0.17 | 0.34309 |
| IPI00464981 | Hypothetical protein gene +108                                  | ITFG3    | integrin alpha FG-GAP repeat containing            | unknown             | other                   | 2        | 0        | 0        | 0          | 0          | 0          | -0.17 | 0.34309 |
| IPI00464999 | Hypothetical protein DKFZp686D22141                             | HEATR6   | HEAT repeat containing 6                           | unknown             | other                   | 0        | 0        | 2        | 0          | 0          | 0          | -0.17 | 0.34309 |
| IPI00470478 | 374 kDa protein                                                 | RNF213   | ring finger protein 213                            | Plasma Membrane     | other                   | 1        | 2        | 1        | 1          | 1          | 1          | -0.17 | 0.34309 |
| IPI00477401 | F-box/WD-repeat protein 9                                       | FBXW9    | F-box and WD repeat domain containing              | unknown             | other                   | 0        | 2        | 0        | 0          | 0          | 0          | -0.17 | 0.34309 |
| IPI00604590 | NME2 protein                                                    |          |                                                    |                     |                         | 1        | 1        | 2        | 1          | 1          | 1          | -0.17 | 0.34309 |
| IPI00640818 | Neuropathy target esterase                                      | PNPLA6   | patatin-like phospholipase domain contai           | Cytoplasm           | enzyme                  | 0        | 0        | 2        | 0          | 0          | 0          | -0.17 | 0.34309 |
| IPI00646469 | WDR26 protein (Fragment)                                        | WDR26    | WD repeat domain 26                                | Cytoplasm           | other                   | 2        | 0        | 0        | 0          | 0          | 0          | -0.17 | 0.34309 |
| IPI00646782 | Hypothetical protein FAM73B                                     | FAM73B   | family with sequence similarity 73, memb           | unknown             | other                   | 2        | 0        | 0        | 0          | 0          | 0          | -0.17 | 0.34309 |
| IPI00744888 | IMP dehydrogenase/GMP reductase family protein                  | RNF219   | ring finger protein 219                            | unknown             | other                   | 2        | 0        | 0        | 0          | 0          | 0          | -0.17 | 0.34309 |
| IPI00003406 | Drebrin                                                         | DBN1     | drebrin 1                                          | Cytoplasm           | other                   | 2        | 0        | 1        | 3          | 0          | 0          | 0.16  | 0.34516 |
| IPI00005277 | Cell cycle checkpoint control protein RAD9A                     | RAD9A    | RAD9 homolog A (S. pombe)                          | Nucleus             | enzyme                  | 0        | 2        | 0        | 0          | 3          | 0          | 0.16  | 0.34516 |
| IPI00010241 | WW domain-containing adaptor with a coiled-coil region, isoform | WAC      | WW domain containing adaptor with coil             | Nucleus             | other                   | 2        | 1        | 0        | 0          | 3          | 0          | 0.16  | 0.34516 |
| IPI00014264 | Centaurin-beta 2                                                | ACAP2    | ArfGAP with coiled-coil, ankyrin repeat ar         | Nucleus             | other                   | 2        | 1        | 1        | 2          | 0          | 2          | 0.16  | 0.34516 |
| IPI00014456 | Striatin                                                        | STRN     | striatin, calmodulin binding protein               | Cytoplasm           | other                   | 2        | 0        | 0        | 2          | 0          | 2          | 0.16  | 0.34516 |
| IPI00015793 | Isoform 1 of Telomerase-binding protein EST1A                   | SMG6     | smg-6 homolog, nonsense mediated mR                | Nucleus             | enzyme                  | 0        | 0        | 2        | 0          | 2          | 2          | 0.16  | 0.34516 |
| IPI00023023 | OTTHUMP00000030182                                              | C20orf30 | chromosome 20 open reading frame 30                | unknown             | other                   | 0        | 0        | 2        | 2          | 0          | 2          | 0.16  | 0.34516 |
| IPI00024425 | Putative eukaryotic translation initiation factor 3 subunit     | KIAA0664 | KIAA0664                                           | Cytoplasm           | translation regulator   | 2        | 1        | 1        | 2          | 2          | 1          | 0.16  | 0.34516 |
| IPI00029484 | Isoform 1 of Zinc finger MYM-type protein 3                     | ZMYM3    | zinc finger, MYM-type 3                            | Nucleus             | other                   | 0        | 0        | 2        | 0          | 0          | 3          | 0.16  | 0.34516 |
| IPI00063219 | Hypothetical protein LOC92345                                   | NAF1     | nuclear assembly factor 1 homolog (S. ce           | Cytoplasm           | other                   | 0        | 0        | 2        | 3          | 0          | 0          | 0.16  | 0.34516 |
| IPI00072534 | smooth muscle cell associated protein-1 isoform 2               | UNC45A   | unc-45 homolog A (C. elegans)                      | Plasma Membrane     | other                   | 1        | 1        | 2        | 1          | 2          | 2          | 0.16  | 0.34516 |
| IPI00140420 | Staphylococcal nuclease domain-containing protein 1             | SND1     | staphylococcal nuclease and tudor domai            | Nucleus             | enzyme                  | 1        | 2        | 1        | 1          | 2          | 2          | 0.16  | 0.34516 |
| IPI00170867 | Isoform 1 of Death domain-associated protein 6                  | DAXX     | death-domain associated protein                    | Nucleus             | transcription regulator | 2        | 0        | 0        | 0          | 3          | 0          | 0.16  | 0.34516 |
| IPI00299635 | Baculoviral IAP repeat-containing protein 6                     | BIRC6    | baculoviral IAP repeat containing 6                | Cytoplasm           | enzyme                  | 0        | 1        | 2        | 2          | 1          | 2          | 0.16  | 0.34516 |
| IPI00329200 | Importin beta-3                                                 | IPO5     | importin 5                                         | Nucleus             | transporter             | 1        | 1        | 2        | 2          | 1          | 2          | 0.16  | 0.34516 |
| IPI00386808 | HDAC7A protein                                                  | HDAC7    | histone deacetylase 7                              | Nucleus             | transcription regulator | 2        | 0        | 0        | 0          | 0          | 3          | 0.16  | 0.34516 |
| IPI00401611 | PREDICTED: RW1 protein isoform 1                                |          |                                                    |                     |                         | 0        | 0        | 2        | 0          | 2          | 2          | 0.16  | 0.34516 |
| IPI00470901 | 215 kDa protein                                                 |          |                                                    |                     |                         | 2        | 0        | 0        | 2          | 0          | 2          | 0.16  | 0.34516 |
| IPI00013788 | HIV TAT specific factor 1                                       | HTATSF1  | HIV-1 Tat specific factor 1                        | Nucleus             | transcription regulator | 42       | 36       | 34       | 45         | 35         | 34         | 0.16  | 0.37110 |
| IPI00001754 | Junctional adhesion molecule A precursor                        | F11R     | F11 receptor                                       | Plasma Membrane     | other                   | 1        | 2        | 2        | 2          | 0          | 0          | -0.16 | 0.37116 |
| IPI00005904 | Probable ATP-dependent RNA helicase DDX20                       | DDX20    | DEAD (Asp-Glu-Ala-Asp) box polypeptide             | Nucleus             | transcription regulator | 3        | 1        | 0        | 2          | 0          | 0          | -0.16 | 0.37116 |
| IPI00009949 | Proteasome inhibitor PI31 subunit                               | PSMF1    | proteasome (prosome, macropain) inhibit            | Cytoplasm           | other                   | 0        | 2        | 2        | 0          | 0          | 2          | -0.16 | 0.37116 |
| IPI00012837 | Kinesin heavy chain                                             | KIF5B    | kinesin family member 5B                           | Cytoplasm           | other                   | 1        | 2        | 2        | 1          | 2          | 1          | -0.16 | 0.37116 |
| IPI00017504 | Protein C9orf40                                                 | C9orf40  | chromosome 9 open reading frame 40                 | unknown             | other                   | 0        | 2        | 2        | 0          | 0          | 2          | -0.16 | 0.37116 |
| IPI00028618 | Methylated-DNA--protein-cysteine methyltransferase              | MGMT     | O-6-methylguanine-DNA methyltransfera              | Nucleus             | enzyme                  | 2        | 2        | 0        | 2          | 0          | 0          | -0.16 | 0.37116 |

**Supplemental Table 1. A list of all phosphorylated proteins identified in SNU216 and SNU216-LR.**

| Accession   | Identified Proteins                                                                                     | Symbol    | Entrez Gene Name                                   | Location        | Type(s)                 | SNU216-1 | SNU216-2 | SNU216-3 | SNU216-LR1 | SNU216-LR2 | SNU216-LR3 | STN   | p-value |
|-------------|---------------------------------------------------------------------------------------------------------|-----------|----------------------------------------------------|-----------------|-------------------------|----------|----------|----------|------------|------------|------------|-------|---------|
| IPI00030976 | Isoform 1 of High-affinity cAMP-specific and IBMX-insensitive 3',5'-cyclic nucleotide phosphodiesterase | PDE8A     | phosphodiesterase 8A                               | Cytoplasm       | enzyme                  | 0        | 1        | 3        | 0          | 0          | 2          | -0.16 | 0.37116 |
| IPI00059366 | H2A histone family, member Y isoform 2                                                                  | H2AFY     | H2A histone family, member Y                       | Nucleus         | other                   | 2        | 2        | 1        | 1          | 1          | 2          | -0.16 | 0.37116 |
| IPI00099463 | Sphingosine-1-phosphate lyase 1                                                                         | SGPL1     | sphingosine-1-phosphate lyase 1                    | Cytoplasm       | enzyme                  | 3        | 0        | 0        | 2          | 1          | 0          | -0.16 | 0.37116 |
| IPI00177381 | hypothetical protein LOC57703                                                                           | CWC22     | CWC22 spliceosome-associated protein h             | Nucleus         | other                   | 2        | 2        | 1        | 2          | 0          | 0          | -0.16 | 0.37116 |
| IPI00185769 | Isoform Beta of ATP-dependent DNA helicase Q5                                                           | RECQL5    | RecQ protein-like 5                                | Nucleus         | enzyme                  | 2        | 0        | 2        | 0          | 0          | 2          | -0.16 | 0.37116 |
| IPI00220845 | Isoform Beta-4A of Integrin beta-4 precursor                                                            | ITGB4     | integrin, beta 4                                   | Plasma Membrane | transmembrane receptor  | 3        | 1        | 1        | 2          | 1          | 1          | -0.16 | 0.37116 |
| IPI00290337 | Epidermal growth factor receptor kinase substrate 8                                                     | EP8       | epidermal growth factor receptor pathwa            | Plasma Membrane | peptidase               | 1        | 2        | 2        | 1          | 0          | 2          | -0.16 | 0.37116 |
| IPI00297191 | CRSP complex subunit 2                                                                                  | MED14     | mediator complex subunit 14                        | Nucleus         | transcription regulator | 0        | 0        | 3        | 1          | 1          | 2          | -0.16 | 0.37116 |
| IPI00337465 | Isoform P of Kinesin light chain 1                                                                      | KLC1      | kinesin light chain 1                              | Cytoplasm       | other                   | 0        | 2        | 2        | 1          | 2          | 1          | -0.16 | 0.37116 |
| IPI00396015 | acetyl-Coenzyme A carboxylase alpha isoform 1                                                           | ACACA     | acetyl-CoA carboxylase alpha                       | Cytoplasm       | enzyme                  | 2        | 1        | 2        | 2          | 0          | 0          | -0.16 | 0.37116 |
| IPI00479669 | hypothetical protein LOC23074 isoform a                                                                 | UHRF1BP1L | UHRF1 binding protein 1-like                       | unknown         | other                   | 0        | 2        | 2        | 0          | 0          | 2          | -0.16 | 0.37116 |
| IPI00735918 | PREDICTED: similar to fat3                                                                              |           |                                                    |                 |                         | 2        | 0        | 2        | 0          | 0          | 2          | -0.16 | 0.37116 |
| IPI00000875 | Elongation factor 1-gamma                                                                               | EEF1G     | eukaryotic translation elongation factor 1         | Cytoplasm       | translation regulator   | 2        | 1        | 2        | 1          | 3          | 2          | 0.16  | 0.37156 |
| IPI00007764 | hematological and neurological expressed 1 isoform 1                                                    | HN1       | hematological and neurological expressec           | Nucleus         | other                   | 2        | 2        | 0        | 2          | 2          | 2          | 0.16  | 0.37156 |
| IPI00014266 | Isoform 1 of Bromodomain-containing protein 3                                                           | BRD3      | bromodomain containing 3                           | Nucleus         | kinase                  | 0        | 3        | 0        | 3          | 0          | 2          | 0.16  | 0.37156 |
| IPI00026497 | Isoform 1 of Poly (ADP-ribose) polymerase 2                                                             | PARP2     | poly (ADP-ribose) polymerase 2                     | Nucleus         | enzyme                  | 3        | 0        | 0        | 2          | 0          | 3          | 0.16  | 0.37156 |
| IPI00033022 | Isoform 1 of Dynamin-2                                                                                  | DNM2      | dynamin 2                                          | Plasma Membrane | enzyme                  | 2        | 2        | 1        | 3          | 2          | 1          | 0.16  | 0.37156 |
| IPI00044583 | Isoform 1 of Transcriptional-regulating factor 1                                                        | TRERF1    | transcriptional regulating factor 1                | Nucleus         | transcription regulator | 0        | 3        | 0        | 2          | 0          | 3          | 0.16  | 0.37156 |
| IPI00171252 | enhancer of zeste 2 isoform b                                                                           | EZH2      | enhancer of zeste homolog 2 (Drosophila)           | Nucleus         | transcription regulator | 0        | 2        | 2        | 3          | 0          | 2          | 0.16  | 0.37156 |
| IPI00254338 | LOC162427 protein                                                                                       | FAM134C   | family with sequence similarity 134, mem           | unknown         | other                   | 0        | 0        | 3        | 0          | 0          | 4          | 0.16  | 0.37156 |
| IPI00290032 | Transient receptor potential cation channel subfamily M member                                          | TRPM7     | transient receptor potential cation channe         | Plasma Membrane | kinase                  | 0        | 0        | 3        | 0          | 0          | 4          | 0.16  | 0.37156 |
| IPI00299524 | Condensin complex subunit 1                                                                             | NCAPD2    | non-SMC condensin I complex, subunit D             | Nucleus         | other                   | 0        | 3        | 0        | 2          | 2          | 2          | 0.16  | 0.37156 |
| IPI00413659 | Isoform 2 of Alkylated repair protein alkB homolog 5                                                    | ALKBH5    | alkB, alkylation repair homolog 5 (E. coli)        | unknown         | other                   | 2        | 2        | 0        | 4          | 0          | 0          | 0.16  | 0.37156 |
| IPI00472044 | Isoform 1 of GTPase-activating Rap/Ran-GAP domain-like 1                                                | RALGAPA1  | Ral GTPase activating protein, alpha subu          | Cytoplasm       | other                   | 2        | 2        | 0        | 2          | 0          | 3          | 0.16  | 0.37156 |
| IPI00001159 | GCN1-like protein 1                                                                                     | GCN1L1    | GCN1 general control of amino-acid synt            | Cytoplasm       | translation regulator   | 2        | 3        | 0        | 1          | 2          | 2          | -0.16 | 0.38465 |
| IPI00019451 | MRG-binding protein                                                                                     | C20orf20  | chromosome 20 open reading frame 20                | Nucleus         | other                   | 2        | 2        | 2        | 0          | 0          | 3          | -0.16 | 0.38465 |
| IPI00106495 | Condensin complex subunit 3                                                                             | NCAPG     | non-SMC condensin I complex, subunit G             | Nucleus         | other                   | 0        | 3        | 2        | 2          | 2          | 1          | -0.16 | 0.38465 |
| IPI00215877 | Isoform Short of Adenomatous polyposis coli protein                                                     | APC       | adenomatous polyposis coli                         | Nucleus         | enzyme                  | 0        | 3        | 2        | 0          | 0          | 3          | -0.16 | 0.38465 |
| IPI00220302 | Isoform 1 of Wilms' tumor 1-associated protein                                                          | WTAP      | Wilms tumor 1 associated protein                   | Nucleus         | other                   | 3        | 2        | 0        | 0          | 2          | 2          | -0.16 | 0.38465 |
| IPI00221093 | 40S ribosomal protein S17                                                                               |           |                                                    |                 |                         | 2        | 2        | 2        | 1          | 2          | 2          | -0.16 | 0.38465 |
| IPI00410485 | Serine/threonine-protein kinase TAO3                                                                    | TAOK3     | TAO kinase 3                                       | Cytoplasm       | kinase                  | 3        | 1        | 2        | 3          | 0          | 0          | -0.16 | 0.38465 |
| IPI00413492 | calpastatin isoform b                                                                                   | CAST      | calpastatin                                        | Cytoplasm       | peptidase               | 1        | 3        | 2        | 2          | 1          | 2          | -0.16 | 0.38465 |
| IPI00440932 | Isoform 1 of ADAM 9 precursor                                                                           | ADAM9     | ADAM metallopeptidase domain 9                     | Plasma Membrane | peptidase               | 2        | 3        | 0        | 0          | 0          | 3          | -0.16 | 0.38465 |
| IPI00556594 | Isoform 1 of Zinc finger CCHC domain-containing protein 8                                               | ZCCHC8    | zinc finger, CCHC domain containing 8              | Nucleus         | other                   | 2        | 2        | 2        | 2          | 2          | 0          | -0.16 | 0.38465 |
| IPI00296432 | Isoform 1 of IWS1-like protein                                                                          | IWS1      | IWS1 homolog (S. cerevisiae)                       | Nucleus         | enzyme                  | 51       | 45       | 55       | 58         | 45         | 50         | 0.15  | 0.38500 |
| IPI00010544 | Isoform 1 of Tight junction-associated protein 1                                                        | TJAP1     | tight junction associated protein 1 (peripl        | Plasma Membrane | other                   | 4        | 0        | 0        | 5          | 0          | 0          | 0.15  | 0.38503 |
| IPI00023856 | Peregrin                                                                                                | BRPF1     | bromodomain and PHD finger containing              | Nucleus         | transporter             | 2        | 0        | 3        | 3          | 2          | 2          | 0.15  | 0.38503 |
| IPI00096972 | Isoform 1 of Histone-lysine N-methyltransferase, H3 lysine-9 spe                                        | EHMT2     | euchromatic histone-lysine N-methyltrans           | Nucleus         | transcription regulator | 2        | 2        | 2        | 0          | 3          | 3          | 0.15  | 0.38503 |
| IPI00157836 | IQ motif and WD repeats 1 isoform a                                                                     | DCAF6     | DDB1 and CUL4 associated factor 6                  | Nucleus         | transcription regulator | 2        | 2        | 2        | 3          | 0          | 3          | 0.15  | 0.38503 |
| IPI00185371 | CDNA FLJ40432 fis, clone TESTI2039227                                                                   | CCNYL1    | cyclin Y-like 1                                    | unknown         | other                   | 4        | 0        | 0        | 0          | 5          | 0          | 0.15  | 0.38503 |
| IPI00304493 | serum response factor binding protein 1                                                                 | SRFBP1    | serum response factor binding protein 1            | Nucleus         | other                   | 2        | 3        | 0        | 0          | 3          | 3          | 0.15  | 0.38503 |
| IPI00410618 | KIAA1143                                                                                                | KIAA1143  | unknown                                            | unknown         | other                   | 2        | 2        | 2        | 3          | 2          | 2          | 0.15  | 0.38503 |
| IPI00425409 | Isoform 4 of Kinesin family member 21A                                                                  | KIF21A    | kinesin family member 21A                          | Cytoplasm       | other                   | 2        | 3        | 0        | 2          | 3          | 2          | 0.15  | 0.38503 |
| IPI00002255 | Lipopolysaccharide-responsive and beige-like anchor protein                                             | LRBA      | LPS-responsive vesicle trafficking, beach          | Cytoplasm       | other                   | 0        | 2        | 4        | 1          | 1          | 4          | -0.15 | 0.39175 |
| IPI00005605 | Isoform 1 of Protein NDRG3                                                                              | NDRG3     | NDRG family member 3                               | Cytoplasm       | other                   | 3        | 2        | 2        | 2          | 2          | 2          | -0.15 | 0.39175 |
| IPI00099311 | Isoform 1 of tRNA                                                                                       | TRMT6     | tRNA methyltransferase 6 homolog (S. ce            | unknown         | other                   | 2        | 3        | 2        | 3          | 2          | 1          | -0.15 | 0.39175 |
| IPI00256859 | Microtubule-actin crosslinking factor 1                                                                 | MACF1     | microtubule-actin crosslinking factor 1            | Cytoplasm       | enzyme                  | 2        | 2        | 3        | 2          | 2          | 2          | -0.15 | 0.39175 |
| IPI00290071 | H326                                                                                                    | DCAF8     | DDB1 and CUL4 associated factor 8                  | unknown         | other                   | 0        | 3        | 3        | 4          | 0          | 0          | -0.15 | 0.39175 |
| IPI00293331 | Ribonucleases P/MRP protein subunit POP1                                                                | POP1      | (includi processing of precursor 1, ribonuclease P | Nucleus         | enzyme                  | 3        | 3        | 0        | 0          | 2          | 3          | -0.15 | 0.39175 |
| IPI00294653 | Protein C21orf5                                                                                         | DOPEY2    | dopey family member 2                              | Cytoplasm       | other                   | 0        | 3        | 3        | 3          | 2          | 1          | -0.15 | 0.39175 |
| IPI00334126 | Ral GEF with PH domain and SH3 binding motif 2, isoform 2                                               | RALGPS2   | Ral GEF with PH domain and SH3 binding             | unknown         | other                   | 0        | 4        | 2        | 0          | 2          | 3          | -0.15 | 0.39175 |
| IPI00002335 | Huntingtin                                                                                              | HTT       | huntingtin                                         | Cytoplasm       | transcription regulator | 2        | 2        | 3        | 2          | 3          | 3          | 0.15  | 0.39198 |
| IPI00013107 | Isoform 1 of Splicing factor, arginine/serine-rich 16                                                   | CLASRP    | CLK4-associated serine/arginine rich prot          | Nucleus         | other                   | 0        | 3        | 3        | 0          | 5          | 2          | 0.15  | 0.39198 |
| IPI00016932 | inositol polyphosphate phosphatase-like 1                                                               | INPPL1    | inositol polyphosphate phosphatase-like            | Cytoplasm       | phosphatase             | 3        | 2        | 2        | 2          | 4          | 2          | 0.15  | 0.39198 |

**Supplemental Table 1. A list of all phosphorylated proteins identified in SNU216 and SNU216-LR.**

| Accession   | Identified Proteins                                                 | Symbol   | Entrez Gene Name                                      | Location        | Type(s)                 | SNU216-1 | SNU216-2 | SNU216-3 | SNU216-LR1 | SNU216-LR2 | SNU216-LR3 | STN   | p-value |
|-------------|---------------------------------------------------------------------|----------|-------------------------------------------------------|-----------------|-------------------------|----------|----------|----------|------------|------------|------------|-------|---------|
| IPI00297593 | Ubiquitin-specific proteinase 34                                    | USP34    | ubiquitin specific peptidase 34                       | unknown         | peptidase               | 2        | 0        | 4        | 3          | 0          | 4          | 0.15  | 0.39198 |
| IPI00021888 | Zinc transporter SLC39A7                                            | SLC39A7  | solute carrier family 39 (zinc transporter),          | Plasma Membrane | transporter             | 5        | 2        | 1        | 4          | 2          | 0          | -0.15 | 0.40053 |
| IPI00171176 | Isoform 1 of Pantothenate kinase 2, mitochondrial precursor         | PANK2    | pantothenate kinase 2                                 | Cytoplasm       | kinase                  | 3        | 3        | 2        | 0          | 3          | 3          | -0.15 | 0.40053 |
| IPI00376404 | fetal Alzheimer antigen isoform 2                                   | BPTF     | bromodomain PHD finger transcription factor           | Nucleus         | transcription regulator | 4        | 1        | 3        | 1          | 3          | 3          | -0.15 | 0.40053 |
| IPI00001738 | Nuclear pore complex protein Nup88                                  | NUP88    | nucleoporin 88kDa                                     | Nucleus         | transporter             | 2        | 3        | 3        | 5          | 3          | 0          | 0.14  | 0.40084 |
| IPI00016639 | Protein kinase C iota type                                          | PRKCI    | protein kinase C, iota                                | Cytoplasm       | kinase                  | 3        | 4        | 0        | 5          | 0          | 3          | 0.14  | 0.40084 |
| IPI00026337 | Isoform 1 of Ran-binding protein 3                                  | RANBP3   | RAN binding protein 3                                 | Nucleus         | other                   | 2        | 3        | 3        | 0          | 4          | 4          | 0.14  | 0.40084 |
| IPI00251559 | Ubiquitin-protein ligase BRE1A                                      | RNF20    | ring finger protein 20                                | Nucleus         | enzyme                  | 2        | 2        | 4        | 3          | 2          | 4          | 0.14  | 0.40084 |
| IPI00640055 | Novel protein                                                       | LARP4B   | La ribonucleoprotein domain family, member 4          | Cytoplasm       | other                   | 0        | 3        | 4        | 3          | 3          | 3          | 0.14  | 0.40084 |
| IPI00738937 | PREDICTED: hypothetical protein LOC57479 isoform 1                  | PRR12    | proline rich 12                                       | unknown         | other                   | 0        | 4        | 3        | 4          | 3          | 2          | 0.14  | 0.40084 |
| IPI00015618 | Hypothetical protein FLJ20291                                       | CWC25    | (includes CWC25 spliceosome-associated protein h)     | unknown         | other                   | 3        | 2        | 4        | 0          | 3          | 4          | -0.14 | 0.40828 |
| IPI00055954 | WD-repeat protein 43                                                | WDR43    | WD repeat domain 43                                   | Nucleus         | other                   | 5        | 3        | 0        | 3          | 3          | 2          | -0.14 | 0.40828 |
| IPI00220594 | Isoform 4 of Intersectin-1                                          | ITSN1    | intersectin 1 (SH3 domain protein)                    | Cytoplasm       | other                   | 3        | 3        | 3        | 3          | 2          | 3          | -0.14 | 0.40828 |
| IPI00410067 | Isoform 1 of Zinc finger CCCH type antiviral protein 1              | ZC3HAV1  | zinc finger CCCH-type, antiviral 1                    | Plasma Membrane | other                   | 3        | 3        | 3        | 1          | 3          | 4          | -0.14 | 0.40828 |
| IPI00023532 | Hypothetical protein DKFZp564A2416                                  | SPATS2L  | spermatogenesis associated, serine-rich 2             | unknown         | other                   | 3        | 4        | 2        | 2          | 5          | 3          | 0.14  | 0.40842 |
| IPI00102059 | Kinase-like protein                                                 | SCYL1    | SCY1-like 1 (S. cerevisiae)                           | Cytoplasm       | kinase                  | 3        | 2        | 4        | 3          | 4          | 3          | 0.14  | 0.40842 |
| IPI00218729 | Isoform 2 of Disks large homolog 1                                  | DLG1     | discs, large homolog 1 (Drosophila)                   | Plasma Membrane | kinase                  | 2        | 4        | 3        | 3          | 3          | 4          | 0.14  | 0.40842 |
| IPI00006752 | Isoform 1 of Mitogen-activated protein kinase kinase kinase kinase  | MAP4K4   | mitogen-activated protein kinase kinase kinase kinase | Cytoplasm       | kinase                  | 3        | 3        | 4        | 3          | 2          | 4          | -0.14 | 0.41412 |
| IPI00032826 | Hsc70-interacting protein                                           | STI3     | suppression of tumorigenicity 13 (colon c)            | Cytoplasm       | other                   | 4        | 2        | 4        | 1          | 4          | 4          | -0.14 | 0.41412 |
| IPI00064382 | CDNA FLJ14681 fis, clone NT2RP2004270, weakly similar to PROTMEM87B | TMEM87B  | transmembrane protein 87B                             | unknown         | other                   | 4        | 2        | 4        | 5          | 0          | 3          | -0.14 | 0.41412 |
| IPI00000015 | Splicing factor, arginine/serine-rich 4                             | SRSF4    | serine/arginine-rich splicing factor 4                | Nucleus         | other                   | 4        | 5        | 0        | 0          | 5          | 5          | 0.13  | 0.41439 |
| IPI00012885 | Isoform 1 of Focal adhesion kinase 1                                | PTK2     | (includes PTK2 protein tyrosine kinase 2)             | Cytoplasm       | kinase                  | 4        | 3        | 3        | 4          | 4          | 3          | 0.13  | 0.41439 |
| IPI00018914 | Tyrosine-protein phosphatase non-receptor type 14                   | PTPN14   | protein tyrosine phosphatase, non-receptor type 14    | Cytoplasm       | phosphatase             | 3        | 3        | 4        | 4          | 4          | 3          | 0.13  | 0.41439 |
| IPI00019848 | Isoform 1 of Host cell factor                                       | HCFC1    | host cell factor C1 (VP16-accessory protein)          | Nucleus         | transcription regulator | 2        | 5        | 3        | 5          | 3          | 3          | 0.13  | 0.41439 |
| IPI00409607 | Novel protein                                                       | CAMSAP2  | calmodulin regulated spectrin-associated protein 2    | unknown         | other                   | 5        | 4        | 0        | 6          | 4          | 0          | 0.13  | 0.41439 |
| IPI00477763 | Serine/threonine-protein kinase MRCK beta                           | CDC42BPB | CDC42 binding protein kinase beta (DMP)               | Cytoplasm       | kinase                  | 4        | 4        | 2        | 3          | 4          | 4          | 0.13  | 0.41439 |
| IPI00001364 | Isoform A of GC-rich sequence DNA-binding factor homolog            | GCFC1    | GC-rich sequence DNA-binding factor 1                 | Nucleus         | other                   | 3        | 4        | 4        | 5          | 4          | 0          | -0.13 | 0.42094 |
| IPI00031627 | DNA-directed RNA polymerase II largest subunit                      | POLR2A   | polymerase (RNA) II (DNA directed) polypeptide 2      | Nucleus         | enzyme                  | 4        | 2        | 5        | 3          | 4          | 3          | -0.13 | 0.42094 |
| IPI00103483 | Negative elongation factor B                                        | COBRA1   | cofactor of BRCA1                                     | Nucleus         | other                   | 4        | 3        | 4        | 3          | 4          | 3          | -0.13 | 0.42094 |
| IPI00451483 | PREDICTED: similar to ribosomal protein S27                         |          |                                                       |                 |                         | 3        | 5        | 3        | 5          | 3          | 2          | -0.13 | 0.42094 |
| IPI00019906 | Isoform 2 of Basigin precursor                                      | BSG      | (includes basigin (Ok blood group))                   | Plasma Membrane | transporter             | 3        | 4        | 4        | 5          | 3          | 4          | 0.13  | 0.42116 |
| IPI00023283 | Isoform 2 of Titin                                                  | TTN      | (includes titin)                                      | Cytoplasm       | kinase                  | 2        | 4        | 5        | 4          | 5          | 3          | 0.13  | 0.42116 |
| IPI00025310 | Zinc finger protein 217                                             | ZNF217   | zinc finger protein 217                               | Nucleus         | transcription regulator | 5        | 3        | 3        | 7          | 0          | 4          | 0.13  | 0.42116 |
| IPI00106955 | Hypothetical protein LOC144097                                      | C11orf84 | chromosome 11 open reading frame 84                   | unknown         | other                   | 4        | 3        | 4        | 4          | 5          | 3          | 0.13  | 0.42116 |
| IPI00152503 | Protein dextex 3-like protein                                       | DTX3L    | deltex 3-like (Drosophila)                            | Cytoplasm       | enzyme                  | 5        | 3        | 3        | 5          | 3          | 4          | 0.13  | 0.42116 |
| IPI00181617 | RNA-binding protein 34                                              | RBM34    | RNA binding motif protein 34                          | Nucleus         | other                   | 5        | 4        | 2        | 3          | 5          | 4          | 0.13  | 0.42116 |
| IPI00218240 | Wolf-Hirschhorn syndrome candidate 1 protein isoform 1              | WHSC1    | Wolf-Hirschhorn syndrome candidate 1                  | Nucleus         | enzyme                  | 4        | 4        | 3        | 4          | 4          | 4          | 0.13  | 0.42116 |
| IPI00017443 | Absent in melanoma 1-like                                           | AIM1L    | absent in melanoma 1-like                             | unknown         | other                   | 5        | 6        | 0        | 4          | 3          | 4          | -0.13 | 0.42656 |
| IPI00306280 | Density-regulated protein                                           | DENR     | density-regulated protein                             | unknown         | other                   | 4        | 3        | 5        | 4          | 4          | 3          | -0.13 | 0.42656 |
| IPI00737498 | PREDICTED: similar to MAX-interacting protein isoform 5             |          |                                                       |                 |                         | 6        | 3        | 3        | 4          | 4          | 3          | -0.13 | 0.42656 |
| IPI00006684 | Isoform 4 of Apoptosis inhibitor 5                                  |          |                                                       |                 |                         | 8        | 3        | 0        | 7          | 4          | 2          | 0.13  | 0.42661 |
| IPI00074148 | dystonin isoform 1                                                  | DST      | dystonin                                              | Plasma Membrane | other                   | 4        | 4        | 4        | 4          | 5          | 4          | 0.13  | 0.42661 |
| IPI00106928 | protein tyrosine phosphatase, non-receptor type 2                   | PTPN2    | protein tyrosine phosphatase, non-receptor type 2     | Cytoplasm       | phosphatase             | 4        | 4        | 4        | 5          | 6          | 2          | 0.13  | 0.42661 |
| IPI00396370 | Isoform 1 of Eukaryotic translation initiation factor 3 subunit 9   | EIF3B    | eukaryotic translation initiation factor 3, subunit 9 | Cytoplasm       | translation regulator   | 5        | 3        | 4        | 4          | 4          | 5          | 0.13  | 0.42661 |
| IPI00005614 | Isoform Long of Spectrin beta chain, brain 1                        | SPTBN1   | spectrin, beta, non-erythrocytic 1                    | Plasma Membrane | other                   | 5        | 4        | 4        | 4          | 4          | 4          | -0.13 | 0.43080 |
| IPI00009471 | WD-repeat protein 3                                                 | WDR3     | WD repeat domain 3                                    | Cytoplasm       | other                   | 5        | 4        | 4        | 4          | 3          | 5          | -0.13 | 0.43080 |
| IPI00027035 | XPA-binding protein 1                                               | GPN1     | GPN-loop GTPase 1                                     | Nucleus         | transcription regulator | 4        | 4        | 5        | 5          | 3          | 4          | -0.13 | 0.43080 |
| IPI00003965 | Ubiquitin carboxyl-terminal hydrolase 7                             | USP7     | ubiquitin specific peptidase 7 (herpes virus)         | Nucleus         | peptidase               | 3        | 4        | 6        | 4          | 4          | 6          | 0.13  | 0.43105 |
| IPI00012340 | Splicing factor, arginine/serine-rich 9                             | SRSF9    | serine/arginine-rich splicing factor 9                | Nucleus         | enzyme                  | 5        | 5        | 3        | 5          | 4          | 5          | 0.13  | 0.43105 |
| IPI00376229 | Isoform 1 of Phosphofurin acidic cluster sorting protein 1          | PACS1    | phosphofurin acidic cluster sorting protein 1         | Cytoplasm       | other                   | 4        | 6        | 3        | 3          | 6          | 5          | 0.13  | 0.43105 |
| IPI00550746 | Nuclear migration protein nudC                                      | NUDC     | nuclear distribution gene C homolog (A. nidulans)     | Cytoplasm       | other                   | 5        | 5        | 3        | 3          | 6          | 5          | 0.13  | 0.43105 |
| IPI00012773 | Isoform Long of Metastasis-associated protein MTA1                  | MTA1     | metastasis associated 1                               | Nucleus         | transcription regulator | 4        | 6        | 4        | 4          | 5          | 4          | -0.13 | 0.43547 |
| IPI00016861 | Isoform 1 of General transcription factor IIIc polypeptide 2        | GTF3C2   | general transcription factor IIIc, polypeptide 2      | Nucleus         | transcription regulator | 4        | 6        | 4        | 7          | 2          | 4          | -0.13 | 0.43547 |
| IPI00029048 | Tubulin--tyrosine ligase-like protein 12                            | TLL12    | tubulin tyrosine ligase-like family, member 12        | unknown         | other                   | 6        | 4        | 4        | 5          | 3          | 5          | -0.13 | 0.43547 |

**Supplemental Table 1. A list of all phosphorylated proteins identified in SNU216 and SNU216-LR.**

| Accession   | Identified Proteins                                                | Symbol     | Entrez Gene Name                            | Location        | Type(s)                 | SNU216-1 | SNU216-2 | SNU216-3 | SNU216-LR1 | SNU216-LR2 | SNU216-LR3 | STN   | p-value |
|-------------|--------------------------------------------------------------------|------------|---------------------------------------------|-----------------|-------------------------|----------|----------|----------|------------|------------|------------|-------|---------|
| IPI00008530 | 60S acidic ribosomal protein P0                                    | RPLP0      | ribosomal protein, large, P0                | Cytoplasm       | other                   | 2        | 3        | 9        | 8          | 3          | 4          | 0.13  | 0.43572 |
| IPI00168849 | Cdc42-interaction protein 4 long isoform                           | TRIP10     | thyroid hormone receptor interactor 10      | Cytoplasm       | other                   | 4        | 4        | 6        | 6          | 5          | 4          | 0.13  | 0.43572 |
| IPI00290094 | Splicing factor, arginine/serine-rich 8                            | SFSWAP     | splicing factor, suppressor of white-apricc | Nucleus         | other                   | 6        | 5        | 3        | 4          | 7          | 4          | 0.13  | 0.43572 |
| IPI00396098 | hypothetical protein LOC168850                                     | ZNF800     | zinc finger protein 800                     | unknown         | other                   | 4        | 5        | 5        | 5          | 5          | 5          | 0.13  | 0.43572 |
| IPI00005036 | RNA-binding protein 5                                              | RBM5       | RNA binding motif protein 5                 | Nucleus         | other                   | 5        | 6        | 4        | 6          | 5          | 5          | 0.12  | 0.43888 |
| IPI00005809 | Serum deprivation-response protein                                 | SDPR       | serum deprivation response                  | Plasma Membrane | other                   | 4        | 5        | 6        | 6          | 5          | 5          | 0.12  | 0.43888 |
| IPI00297723 | RNA-binding protein 6                                              | RBM6       | RNA binding motif protein 6                 | Nucleus         | other                   | 6        | 5        | 4        | 7          | 5          | 4          | 0.12  | 0.43888 |
| IPI00296291 | HP1-BP74                                                           | HP1BP3     | heterochromatin protein 1, binding prote    | Nucleus         | other                   | 5        | 6        | 4        | 6          | 3          | 5          | -0.13 | 0.43893 |
| IPI00477535 | DNA-repair protein complementing XP-G cells                        |            |                                             |                 |                         | 5        | 6        | 4        | 3          | 6          | 5          | -0.13 | 0.43893 |
| IPI00071185 | Isoform SV1 of PITSLRE serine/threonine-protein kinase CDC2L1      | CDK11A/CDK | cyclin-dependent kinase 11B                 | Nucleus         | kinase                  | 6        | 3        | 7        | 7          | 5          | 5          | 0.12  | 0.44302 |
| IPI00384202 | Isoform 1 of Probable JmjC domain-containing histone demethylase 1 | JMJD1C     | jumonji domain containing 1C                | Nucleus         | other                   | 4        | 6        | 6        | 7          | 5          | 5          | 0.12  | 0.44302 |
| IPI00009659 | Protein C20orf77                                                   | RPRD1B     | regulation of nuclear pre-mRNA domain       | unknown         | other                   | 6        | 5        | 5        | 6          | 5          | 4          | -0.12 | 0.44305 |
| IPI00011675 | Isoform Sp100-HMG of Nuclear autoantigen Sp-100                    | SP100      | SP100 nuclear antigen                       | Nucleus         | transcription regulator | 5        | 5        | 6        | 6          | 6          | 3          | -0.12 | 0.44305 |
| IPI00166680 | Isoform 3 of Misshapen-like kinase 1                               | MINK1      | misshapen-like kinase 1                     | Cytoplasm       | kinase                  | 4        | 7        | 5        | 3          | 5          | 7          | -0.12 | 0.44305 |
| IPI00004497 | Breakpoint cluster region protein                                  | BCR        | breakpoint cluster region                   | Cytoplasm       | kinase                  | 5        | 6        | 6        | 5          | 5          | 6          | -0.12 | 0.44776 |
| IPI00432436 | PHACTR4 protein                                                    | PHACTR4    | phosphatase and actin regulator 4           | unknown         | other                   | 5        | 5        | 7        | 5          | 5          | 6          | -0.12 | 0.44776 |
| IPI00031241 | golgi reassembly stacking protein 2                                | GORASP2    | golgi reassembly stacking protein 2, 55kD   | Cytoplasm       | other                   | 6        | 6        | 6        | 4          | 8          | 7          | 0.12  | 0.45107 |
| IPI00106567 | WD-repeat protein 33                                               | WDR33      | WD repeat domain 33                         | Nucleus         | other                   | 6        | 6        | 6        | 2          | 6          | 9          | -0.12 | 0.45128 |
| IPI00386170 | Sperm specific antigen 2                                           | SSFA2      | sperm specific antigen 2                    | Plasma Membrane | other                   | 7        | 6        | 5        | 6          | 7          | 4          | -0.12 | 0.45128 |
| IPI00465028 | Triosephosphate isomerase                                          |            |                                             |                 |                         | 6        | 5        | 7        | 6          | 6          | 5          | -0.12 | 0.45128 |
| IPI00014513 | Transcriptional repressor protein YY1                              | YY1        | YY1 transcription factor                    | Nucleus         | transcription regulator | 7        | 6        | 6        | 5          | 8          | 7          | 0.12  | 0.45363 |
| IPI00718792 | LOC387680 protein (Fragment)                                       | FAM21B     | family with sequence similarity 21, memb    | Cytoplasm       | other                   | 6        | 6        | 7        | 5          | 6          | 7          | -0.12 | 0.45394 |
| IPI00333858 | zinc finger RNA binding protein                                    | ZFR        | zinc finger RNA binding protein             | Nucleus         | other                   | 8        | 6        | 7        | 8          | 8          | 6          | 0.12  | 0.45756 |
| IPI00465050 | Isoform C of Lethal(2) giant larvae protein homolog 2              | LLGL2      | lethal giant larvae homolog 2 (Drosophila)  | Cytoplasm       | other                   | 7        | 7        | 7        | 8          | 7          | 7          | 0.12  | 0.45756 |
| IPI00291946 | Ubiquitin carboxyl-terminal hydrolase 10                           | USP10      | ubiquitin specific peptidase 10             | Cytoplasm       | peptidase               | 7        | 8        | 6        | 6          | 7          | 7          | -0.12 | 0.45797 |
| IPI00304692 | Heterogeneous nuclear ribonucleoprotein G                          | RBMX       | RNA binding motif protein, X-linked         | Nucleus         | other                   | 7        | 7        | 8        | 10         | 7          | 6          | 0.11  | 0.45918 |
| IPI00457284 | hypothetical protein LOC23131                                      | GPATC8     | G patch domain containing 8                 | unknown         | other                   | 8        | 8        | 7        | 10         | 6          | 8          | 0.11  | 0.46112 |
| IPI00301263 | CAD protein                                                        | CAD        | carbamoyl-phosphate synthetase 2, aspar     | Cytoplasm       | enzyme                  | 7        | 11       | 6        | 8          | 8          | 9          | 0.11  | 0.46311 |
| IPI00409635 | KIAA1228 protein                                                   | ESYT2      | extended synaptotagmin-like protein 2       | unknown         | other                   | 8        | 8        | 8        | 9          | 6          | 8          | -0.11 | 0.46330 |
| IPI00646885 | Rho GTPase activating protein 5 isoform a                          | ARHGAP5    | Rho GTPase activating protein 5             | Cytoplasm       | enzyme                  | 8        | 8        | 8        | 7          | 10         | 6          | -0.11 | 0.46330 |
| IPI00144293 | Isoform 1 of YTH domain-containing protein 1                       | YTHDC1     | YTH domain containing 1                     | Cytoplasm       | other                   | 10       | 7        | 8        | 9          | 9          | 8          | 0.11  | 0.46439 |
| IPI00217626 | IMP dehydrogenase/GMP reductase family protein                     | RBM12B     | RNA binding motif protein 12B               | unknown         | other                   | 10       | 8        | 8        | 10         | 7          | 10         | 0.11  | 0.46601 |
| IPI00396387 | guanine nucleotide binding protein-like 1                          | GNL1       | guanine nucleotide binding protein-like 1   | unknown         | other                   | 10       | 9        | 7        | 8          | 8          | 11         | 0.11  | 0.46601 |
| IPI00376317 | autoantigen RCD8                                                   | EDC4       | enhancer of mRNA decapping 4                | Cytoplasm       | other                   | 9        | 10       | 7        | 9          | 8          | 8          | -0.11 | 0.46611 |
| IPI00654555 | NOL1 protein                                                       | NOP2       | NOP2 nucleolar protein homolog (yeast)      | Nucleus         | other                   | 11       | 8        | 8        | 9          | 8          | 9          | -0.11 | 0.46757 |
| IPI00000733 | U3 small nucleolar RNA-associated protein 18 homolog               |            |                                             |                 |                         | 11       | 10       | 7        | 8          | 11         | 10         | 0.11  | 0.46857 |
| IPI00337315 | Isoform 1 of Retinoblastoma-binding protein 6                      | RBBP6      | retinoblastoma binding protein 6            | Nucleus         | enzyme                  | 10       | 10       | 8        | 9          | 9          | 11         | 0.11  | 0.46857 |
| IPI00436632 | Isoform 1 of Nipped-B-like protein                                 | NIPBL      | Nipped-B homolog (Drosophila)               | Nucleus         | transcription regulator | 9        | 8        | 11       | 9          | 10         | 8          | -0.11 | 0.46873 |
| IPI00026952 | Plakophilin-3                                                      | PKP3       | plakophilin 3                               | Plasma Membrane | other                   | 9        | 9        | 12       | 11         | 9          | 11         | 0.11  | 0.47037 |
| IPI00030408 | M-phase phosphoprotein 8                                           | MPHOSPH8   | M-phase phosphoprotein 8                    | Nucleus         | transcription regulator | 12       | 10       | 8        | 11         | 11         | 9          | 0.11  | 0.47037 |
| IPI00018098 | Novel protein                                                      | PRPF38B    | PRP38 pre-mRNA processing factor 38 (y      | unknown         | other                   | 11       | 11       | 8        | 8          | 10         | 11         | -0.11 | 0.47063 |
| IPI00297322 | Zinc finger protein 289, ID1 regulated                             | ARFGAP2    | ADP-ribosylation factor GTPase activating   | Nucleus         | other                   | 11       | 10       | 9        | 8          | 12         | 9          | -0.11 | 0.47063 |
| IPI00514311 | CTTNBP2 N-terminal-like protein                                    | CTTNBP2NL  | CTTNBP2 N-terminal like                     | Cytoplasm       | other                   | 11       | 11       | 8        | 8          | 10         | 11         | -0.11 | 0.47063 |
| IPI00001735 | nuclear receptor co-repressor 2                                    | NCOR2      | nuclear receptor corepressor 2              | Nucleus         | transcription regulator | 9        | 10       | 12       | 9          | 11         | 10         | -0.11 | 0.47187 |
| IPI00002186 | Brefeldin A-inhibited guanine nucleotide-exchange protein 2        | ARFGEF2    | ADP-ribosylation factor guanine nucleotid   | Cytoplasm       | other                   | 10       | 11       | 10       | 11         | 9          | 10         | -0.11 | 0.47187 |
| IPI00100197 | Isoform 1 of NSFL1 cofactor p47                                    | NSFL1C     | NSFL1 (p97) cofactor (p47)                  | Cytoplasm       | other                   | 11       | 11       | 10       | 10         | 10         | 11         | -0.11 | 0.47320 |
| IPI00011253 | 40S ribosomal protein S3                                           | RPS3       | ribosomal protein S3                        | Cytoplasm       | enzyme                  | 10       | 12       | 11       | 11         | 11         | 10         | -0.11 | 0.47414 |
| IPI00328929 | Conserved nuclear protein NHN1                                     | ZC3H18     | zinc finger CCCH-type containing 18         | Nucleus         | other                   | 17       | 10       | 6        | 13         | 11         | 8          | -0.11 | 0.47414 |
| IPI00215743 | Isoform 3 of Ribosome-binding protein 1                            | RRBP1      | ribosome binding protein 1 homolog 18C      | Cytoplasm       | transporter             | 11       | 12       | 11       | 12         | 11         | 12         | 0.10  | 0.47460 |
| IPI00187011 | Zinc finger CCCH-type domain-containing protein C19orf7            | ZC3H4      | zinc finger CCCH-type containing 4          | unknown         | other                   | 10       | 13       | 11       | 12         | 10         | 11         | -0.10 | 0.47493 |
| IPI00465054 | Hypothetical protein DKFZp86C1054                                  | THUMP1     | THUMP domain containing 1                   | unknown         | other                   | 13       | 11       | 11       | 12         | 11         | 11         | -0.10 | 0.47563 |
| IPI00218696 | Isoform 4 of Caldesmon                                             | CALD1      | caldesmon 1                                 | Cytoplasm       | other                   | 11       | 12       | 13       | 14         | 12         | 11         | 0.10  | 0.47572 |
| IPI00336047 | Isoform Long of Myosin-9B                                          | MYO9B      | myosin IXB                                  | Cytoplasm       | enzyme                  | 15       | 13       | 11       | 16         | 13         | 9          | -0.10 | 0.47779 |
| IPI00291916 | pleckstrin homology domain interacting protein                     | PHIP       | pleckstrin homology domain interacting f    | Nucleus         | other                   | 13       | 18       | 16       | 19         | 15         | 14         | 0.10  | 0.48065 |



**Supplemental Table 1. A list of all phosphorylated proteins identified in SNU216 and SNU216-LR.**

| Accession   | Identified Proteins                                                  | Symbol   | Entrez Gene Name                             | Location            | Type(s)                 | SNU216-1 | SNU216-2 | SNU216-3 | SNU216-LR1 | SNU216-LR2 | SNU216-LR3 | STN   | p-value |
|-------------|----------------------------------------------------------------------|----------|----------------------------------------------|---------------------|-------------------------|----------|----------|----------|------------|------------|------------|-------|---------|
| IPI00017297 | Matrin-3                                                             | MATR3    | matrin 3                                     | Nucleus             | other                   | 17       | 17       | 18       | 19         | 18         | 16         | 0.09  | 0.48155 |
| IPI00022790 | Microfibrillar-associated protein 1                                  | MFAP1    | microfibrillar-associated protein 1          | Extracellular Space | other                   | 18       | 16       | 19       | 21         | 13         | 20         | 0.09  | 0.48188 |
| IPI00418316 | RACK7 isoform e                                                      | ZMYND8   | zinc finger, MYND-type containing 8          | Nucleus             | transcription regulator | 22       | 17       | 14       | 21         | 14         | 17         | -0.09 | 0.48213 |
| IPI00018370 | Isoform 2 of Supervillin                                             | SVIL     | supervillin                                  | Plasma Membrane     | other                   | 23       | 23       | 28       | 27         | 23         | 25         | 0.09  | 0.48412 |
| IPI00183794 | zinc finger protein 265 isoform 2                                    | ZRANB2   | zinc finger, RAN-binding domain containi     | Nucleus             | transcription regulator | 28       | 22       | 25       | 22         | 29         | 25         | 0.09  | 0.48416 |
| IPI00005625 | 136 kDa protein                                                      |          |                                              |                     |                         | 24       | 27       | 26       | 23         | 29         | 26         | 0.09  | 0.48426 |
| IPI00000105 | Major vault protein                                                  | MVP      | major vault protein                          | Nucleus             | other                   | 1        | 0        | 1        | 0          | 0          | 0          | 0.00  | 0.48663 |
| IPI00000494 | 60S ribosomal protein L5                                             | RPL5     | ribosomal protein L5                         | Cytoplasm           | other                   | 0        | 1        | 0        | 0          | 0          | 0          | 0.00  | 0.48663 |
| IPI00000513 | E-cadherin                                                           | CDH1     | cadherin 1, type 1, E-cadherin (epithelial)  | Plasma Membrane     | other                   | 1        | 1        | 0        | 1          | 1          | 0          | 0.00  | 0.48663 |
| IPI00000685 | Cell division protein kinase 7                                       | CDK7     | cyclin-dependent kinase 7                    | Nucleus             | kinase                  | 1        | 0        | 0        | 0          | 0          | 0          | 0.00  | 0.48663 |
| IPI00000728 | Isoform 1 of Ubiquitin carboxyl-terminal hydrolase 15                | USP15    | ubiquitin specific peptidase 15              | Cytoplasm           | peptidase               | 0        | 0        | 0        | 0          | 1          | 1          | 0.00  | 0.48663 |
| IPI00000816 | 14-3-3 protein epsilon                                               | YWHAE    | tyrosine 3-monooxygenase/tryptophan 5-       | Cytoplasm           | other                   | 1        | 1        | 0        | 0          | 0          | 0          | 0.00  | 0.48663 |
| IPI00000856 | Isoform 1 of Pleckstrin homology domain-containing family C member 2 | FERMT2   | fermitin family member 2                     | Cytoplasm           | other                   | 2        | 0        | 4        | 3          | 1          | 3          | 0.00  | 0.48663 |
| IPI00001134 | CDNA FLJ11153 fis, clone PLACE1006917, weakly similar to HSH4        | RBM7     | RNA binding motif protein 7                  | unknown             | other                   | 0        | 0        | 0        | 1          | 0          | 0          | 0.00  | 0.48663 |
| IPI00001466 | Echinoderm microtubule-associated protein-like 4                     | EML4     | echinoderm microtubule associated prote      | Cytoplasm           | other                   | 5        | 5        | 5        | 5          | 5          | 5          | 0.00  | 0.48663 |
| IPI00001757 | Isoform 1 of RNA-binding protein 8A                                  | RBM8A    | RNA binding motif protein 8A                 | Nucleus             | other                   | 3        | 4        | 3        | 4          | 3          | 3          | 0.00  | 0.48663 |
| IPI00002054 | 132 kDa protein                                                      | ZNF687   | zinc finger protein 687                      | Nucleus             | other                   | 4        | 3        | 4        | 5          | 0          | 5          | 0.00  | 0.48663 |
| IPI00002232 | Isoform 1 of Serine/threonine-protein kinase TAO1                    | TAOK1    | TAO kinase 1                                 | Cytoplasm           | kinase                  | 0        | 0        | 2        | 0          | 2          | 0          | 0.00  | 0.48663 |
| IPI00002406 | Lutheran blood group glycoprotein precursor                          | BCAM     | basal cell adhesion molecule (Lutheran bl    | Plasma Membrane     | transmembrane receptor  | 0        | 0        | 0        | 1          | 0          | 0          | 0.00  | 0.48663 |
| IPI00002579 | RB-binding protein                                                   | KDM5B    | lysine (K)-specific demethylase 5B           | Nucleus             | transcription regulator | 0        | 1        | 0        | 0          | 0          | 0          | 0.00  | 0.48663 |
| IPI00002580 | Phosphatidylinositol-4-phosphate 3-kinase C2 domain-containing       | PIK3C2A  | phosphoinositide-3-kinase, class 2, alpha    | Cytoplasm           | kinase                  | 0        | 0        | 0        | 0          | 1          | 0          | 0.00  | 0.48663 |
| IPI00002902 | Nucleolar protein 9                                                  | NOL9     | nucleolar protein 9                          | Nucleus             | other                   | 0        | 1        | 0        | 0          | 1          | 1          | 0.00  | 0.48663 |
| IPI00002966 | Heat shock 70 kDa protein 4                                          | HSPA4    | heat shock 70kDa protein 4                   | Cytoplasm           | other                   | 1        | 0        | 0        | 0          | 1          | 0          | 0.00  | 0.48663 |
| IPI00003519 | 116 kDa U5 small nuclear ribonucleoprotein component                 | EFTUD2   | elongation factor Tu GTP binding domain      | Nucleus             | enzyme                  | 0        | 0        | 1        | 0          | 0          | 0          | 0.00  | 0.48663 |
| IPI00003783 | Dual specificity mitogen-activated protein kinase kinase 2           | MAP2K2   | mitogen-activated protein kinase kinase 2    | Cytoplasm           | kinase                  | 2        | 3        | 4        | 4          | 2          | 3          | 0.00  | 0.48663 |
| IPI00003799 | Isoform 2 of Heme-binding protein 2                                  | HEBP2    | heme binding protein 2                       | Cytoplasm           | other                   | 0        | 0        | 0        | 0          | 0          | 1          | 0.00  | 0.48663 |
| IPI00003865 | Isoform 1 of Heat shock cognate 71 kDa protein                       | HSPA8    | heat shock 70kDa protein 8                   | Cytoplasm           | enzyme                  | 1        | 0        | 0        | 0          | 0          | 0          | 0.00  | 0.48663 |
| IPI00004962 | golgi phosphoprotein 4                                               | GOLIM4   | golgi integral membrane protein 4            | Cytoplasm           | other                   | 3        | 3        | 4        | 3          | 3          | 4          | 0.00  | 0.48663 |
| IPI00005260 | proteasome (prosome, macropain) activator subunit 4                  | PSME4    | proteasome (prosome, macropain) activat      | Cytoplasm           | other                   | 0        | 0        | 0        | 0          | 1          | 1          | 0.00  | 0.48663 |
| IPI00005648 | Scaffold attachment factor B2                                        | SAFB2    | scaffold attachment factor B2                | Cytoplasm           | other                   | 0        | 0        | 0        | 0          | 1          | 0          | 0.00  | 0.48663 |
| IPI00005826 | HECT domain and RCC1-like domain-containing protein 2                | HERC2    | hect domain and RLD 2                        | Cytoplasm           | enzyme                  | 4        | 5        | 4        | 3          | 5          | 5          | 0.00  | 0.48663 |
| IPI00005978 | Splicing factor, arginine/serine-rich 2                              | SRSF2    | serine/arginine-rich splicing factor 2       | Nucleus             | transcription regulator | 1        | 4        | 1        | 2          | 2          | 2          | 0.00  | 0.48663 |
| IPI00006122 | Isoform MEA6 of Cutaneous T-cell lymphoma-associated antigen         | CTAGE5   | CTAGE family, member 5                       | Cytoplasm           | enzyme                  | 1        | 1        | 0        | 0          | 0          | 0          | 0.00  | 0.48663 |
| IPI00006379 | Nucleolar protein NOP5                                               | NOP58    | NOP58 ribonucleoprotein homolog (yeast)      | Nucleus             | enzyme                  | 0        | 0        | 0        | 0          | 1          | 0          | 0.00  | 0.48663 |
| IPI00006451 | Vesicle-fusing ATPase                                                | NSF      | N-ethylmaleimide-sensitive factor            | Cytoplasm           | transporter             | 1        | 0        | 0        | 0          | 0          | 0          | 0.00  | 0.48663 |
| IPI00006482 | Isoform Long of Sodium/potassium-transporting ATPase alpha-1         | ATP1A1   | ATPase, Na+/K+ transporting, alpha 1 po      | Plasma Membrane     | transporter             | 1        | 0        | 0        | 0          | 0          | 0          | 0.00  | 0.48663 |
| IPI00007423 | Isoform 1 of Acidic leucine-rich nuclear phosphoprotein 32 family    | ANP32B   | acidic (leucine-rich) nuclear phosphoprote   | Nucleus             | other                   | 1        | 1        | 0        | 0          | 1          | 0          | 0.00  | 0.48663 |
| IPI00007702 | Heat shock-related 70 kDa protein 2                                  | HSPA2    | heat shock 70kDa protein 2                   | Cytoplasm           | other                   | 0        | 0        | 0        | 0          | 1          | 0          | 0.00  | 0.48663 |
| IPI00007729 | Isoform 1 of Nucleolar protein 7                                     | NOL7     | nucleolar protein 7, 27kDa                   | Nucleus             | other                   | 1        | 1        | 0        | 0          | 0          | 0          | 0.00  | 0.48663 |
| IPI00007765 | Stress-70 protein, mitochondrial precursor                           | HSPA9    | heat shock 70kDa protein 9 (mortalin)        | Cytoplasm           | other                   | 1        | 0        | 0        | 0          | 0          | 0          | 0.00  | 0.48663 |
| IPI00007926 | c-Myc-responsive protein Rcl                                         | C6orf108 | chromosome 6 open reading frame 108          | Nucleus             | other                   | 1        | 1        | 0        | 0          | 0          | 1          | 0.00  | 0.48663 |
| IPI00008137 | Zinc finger protein 295                                              | ZNF295   | zinc finger protein 295                      | Nucleus             | other                   | 0        | 2        | 3        | 0          | 0          | 4          | 0.00  | 0.48663 |
| IPI00008144 | Isoform 1 of Neurabin-1                                              | PPP1R9A  | protein phosphatase 1, regulatory subunit    | unknown             | other                   | 0        | 1        | 0        | 0          | 0          | 0          | 0.00  | 0.48663 |
| IPI00008179 | Isoform 1 of Sulfotransferase family cytosolic 2B member 1           | SULT2B1  | sulfotransferase family, cytosolic, 2B, mem  | Cytoplasm           | enzyme                  | 1        | 0        | 0        | 0          | 0          | 0          | 0.00  | 0.48663 |
| IPI00008200 | Isoform 1 of YEATS domain-containing protein 2                       | YEATS2   | YEATS domain containing 2                    | Nucleus             | transcription regulator | 4        | 3        | 0        | 0          | 6          | 0          | 0.00  | 0.48663 |
| IPI00008438 | 40S ribosomal protein S10                                            | RPS10    | ribosomal protein S10                        | Cytoplasm           | other                   | 1        | 1        | 0        | 1          | 1          | 1          | 0.00  | 0.48663 |
| IPI00008575 | Isoform 1 of KH domain-containing, RNA-binding, signal transdu       | KHDRBS1  | KH domain containing, RNA binding, sig       | Nucleus             | transcription regulator | 1        | 2        | 2        | 1          | 2          | 2          | 0.00  | 0.48663 |
| IPI00009315 | Golgi resident protein GCP60                                         | ACBD3    | acyl-CoA binding domain containing 3         | Cytoplasm           | other                   | 1        | 1        | 0        | 0          | 0          | 0          | 0.00  | 0.48663 |
| IPI00009328 | Probable ATP-dependent RNA helicase DDX48                            | EIF4A3   | eukaryotic translation initiation factor 4A: | Nucleus             | enzyme                  | 0        | 1        | 0        | 1          | 1          | 1          | 0.00  | 0.48663 |
| IPI00009790 | 6-phosphofructokinase type C                                         | PFKP     | phosphofructokinase, platelet                | Cytoplasm           | kinase                  | 4        | 8        | 4        | 7          | 5          | 4          | 0.00  | 0.48663 |
| IPI00009922 | DC50                                                                 | SLIRP    | SRA stem-loop interacting RNA binding f      | Cytoplasm           | other                   | 0        | 0        | 0        | 0          | 0          | 1          | 0.00  | 0.48663 |
| IPI00010105 | Eukaryotic translation initiation factor 6                           | EIF6     | eukaryotic translation initiation factor 6   | Cytoplasm           | translation regulator   | 0        | 0        | 1        | 1          | 1          | 0          | 0.00  | 0.48663 |
| IPI00010141 | DNA polymerase epsilon subunit 3                                     | POLE3    | polymerase (DNA directed), epsilon 3 (p1     | Nucleus             | enzyme                  | 0        | 0        | 1        | 1          | 1          | 1          | 0.00  | 0.48663 |
| IPI00010200 | YTH domain containing 2                                              | YTHDC2   | YTH domain containing 2                      | unknown             | other                   | 1        | 1        | 1        | 0          | 0          | 0          | 0.00  | 0.48663 |

**Supplemental Table 1. A list of all phosphorylated proteins identified in SNU216 and SNU216-LR.**

| Accession   | Identified Proteins                                              | Symbol   | Entrez Gene Name                             | Location            | Type(s)                 | SNU216-1 | SNU216-2 | SNU216-3 | SNU216-LR1 | SNU216-LR2 | SNU216-LR3 | STN  | p-value |
|-------------|------------------------------------------------------------------|----------|----------------------------------------------|---------------------|-------------------------|----------|----------|----------|------------|------------|------------|------|---------|
| IPI00010320 | Chromobox protein homolog 1                                      | CBX1     | chromobox homolog 1                          | Nucleus             | transcription regulator | 2        | 1        | 0        | 2          | 0          | 0          | 0.00 | 0.48663 |
| IPI00010586 | TATA element modulatory factor                                   | TMF1     | TATA element modulatory factor 1             | Cytoplasm           | transcription regulator | 1        | 3        | 0        | 0          | 3          | 0          | 0.00 | 0.48663 |
| IPI00010653 | Isoform 1 of RNA exonuclease 4                                   | REXO4    | REX4, RNA exonuclease 4 homolog (S. ce       | Nucleus             | transcription regulator | 2        | 2        | 2        | 0          | 3          | 2          | 0.00 | 0.48663 |
| IPI00010896 | Chloride intracellular channel protein 1                         | CLIC1    | chloride intracellular channel 1             | Nucleus             | ion channel             | 0        | 0        | 1        | 0          | 1          | 0          | 0.00 | 0.48663 |
| IPI00011689 | Elongation factor 2 kinase                                       | EEF2K    | eukaryotic elongation factor-2 kinase        | Cytoplasm           | kinase                  | 4        | 3        | 2        | 3          | 3          | 3          | 0.00 | 0.48663 |
| IPI00011875 | Protein Red                                                      | IK       | IK cytokine, down-regulator of HLA II        | Extracellular Space | cytokine                | 0        | 1        | 0        | 0          | 1          | 1          | 0.00 | 0.48663 |
| IPI00012200 | MGC2477 protein                                                  | C11orf48 | chromosome 11 open reading frame 48          | unknown             | other                   | 1        | 0        | 0        | 0          | 0          | 0          | 0.00 | 0.48663 |
| IPI00012341 | Isoform SRP40-1 of Splicing factor, arginine/serine-rich 5       | SRSF5    | serine/arginine-rich splicing factor 5       | Nucleus             | other                   | 0        | 0        | 0        | 1          | 1          | 0          | 0.00 | 0.48663 |
| IPI00012578 | Importin alpha-4 subunit                                         | KPNA4    | karyopherin alpha 4 (importin alpha 3)       | Nucleus             | transporter             | 0        | 0        | 0        | 1          | 0          | 0          | 0.00 | 0.48663 |
| IPI00012866 | RAC-alpha serine/threonine-protein kinase                        | AKT1     | v-akt murine thymoma viral oncogene hc       | Cytoplasm           | kinase                  | 1        | 0        | 0        | 0          | 1          | 0          | 0.00 | 0.48663 |
| IPI00013070 | Isoform 1 of Heterogeneous nuclear ribonucleoprotein U-like pr   | HNRNPUL1 | heterogeneous nuclear ribonucleoprotein      | Nucleus             | other                   | 0        | 0        | 0        | 0          | 1          | 0          | 0.00 | 0.48663 |
| IPI00013122 | Hsp90 co-chaperone Cdc37                                         | CDC37    | cell division cycle 37 homolog (S. cerevisi  | Cytoplasm           | other                   | 0        | 0        | 1        | 1          | 0          | 1          | 0.00 | 0.48663 |
| IPI00013415 | 40S ribosomal protein S7                                         | RPS7     | ribosomal protein S7                         | Cytoplasm           | other                   | 0        | 0        | 0        | 1          | 0          | 0          | 0.00 | 0.48663 |
| IPI00013439 | Transcription factor jun-B                                       | JUNB     | jun B proto-oncogene                         | Nucleus             | transcription regulator | 2        | 2        | 3        | 2          | 3          | 2          | 0.00 | 0.48663 |
| IPI00013537 | Hypothetical protein FUJ20004                                    | KANK2    | KN motif and ankyrin repeat domains 2        | Nucleus             | transcription regulator | 0        | 0        | 0        | 0          | 0          | 1          | 0.00 | 0.48663 |
| IPI00013877 | Isoform 1 of Heterogeneous nuclear ribonucleoprotein H3          | HNRNP3   | heterogeneous nuclear ribonucleoprotein      | Nucleus             | other                   | 1        | 1        | 0        | 0          | 0          | 0          | 0.00 | 0.48663 |
| IPI00014149 | Tetratricopeptide repeat protein KIAA0103                        | TTC35    | tetratricopeptide repeat domain 35           | Nucleus             | other                   | 0        | 1        | 1        | 0          | 1          | 0          | 0.00 | 0.48663 |
| IPI00014235 | Similar to RAB3 GTPase-activating protein                        | RAB3GAP1 | RAB3 GTPase activating protein subunit 1     | Cytoplasm           | other                   | 1        | 1        | 0        | 0          | 1          | 0          | 0.00 | 0.48663 |
| IPI00014850 | Astrocytic phosphoprotein PEA-15                                 | PEA15    | phosphoprotein enriched in astrocytes 15     | Cytoplasm           | transporter             | 1        | 2        | 1        | 1          | 1          | 2          | 0.00 | 0.48663 |
| IPI00015286 | Dedicator of cytokinesis protein 1                               | DOCK1    | dedicator of cytokinesis 1                   | Cytoplasm           | other                   | 1        | 0        | 0        | 0          | 0          | 0          | 0.00 | 0.48663 |
| IPI00015404 | Isoform 1 of AT-rich interactive domain-containing protein 1B    | ARID1B   | AT rich interactive domain 1B (SWI1-like)    | Nucleus             | transcription regulator | 1        | 0        | 1        | 0          | 0          | 0          | 0.00 | 0.48663 |
| IPI00015526 | Isoform 1 of Histone-lysine N-methyltransferase, H3 lysine-9 spe |          |                                              |                     |                         | 0        | 0        | 0        | 1          | 0          | 0          | 0.00 | 0.48663 |
| IPI00015580 | formin binding protein 1-like isoform 2                          | FNBP1L   | formin binding protein 1-like                | unknown             | other                   | 6        | 8        | 5        | 7          | 7          | 5          | 0.00 | 0.48663 |
| IPI00015799 | Diacylglycerol O-acyltransferase 1                               | DGAT1    | diacylglycerol O-acyltransferase 1           | Cytoplasm           | enzyme                  | 1        | 1        | 1        | 1          | 1          | 1          | 0.00 | 0.48663 |
| IPI00015905 | Exosome complex exonuclease RRP4                                 | EXOSC2   | exosome component 2                          | Nucleus             | enzyme                  | 0        | 0        | 0        | 1          | 0          | 0          | 0.00 | 0.48663 |
| IPI00015954 | GTP-binding protein SAR1a                                        | SAR1A    | SAR1 homolog A (S. cerevisiae)               | Cytoplasm           | enzyme                  | 1        | 1        | 0        | 0          | 1          | 1          | 0.00 | 0.48663 |
| IPI00016725 | General transcription factor 3C polypeptide 4                    | GTF3C4   | general transcription factor IIIc, polypepti | Nucleus             | transcription regulator | 1        | 1        | 0        | 1          | 0          | 0          | 0.00 | 0.48663 |
| IPI00017746 | BRCA1-associated RING domain protein 1                           | BARD1    | BRCA1 associated RING domain 1               | Nucleus             | transcription regulator | 1        | 0        | 0        | 0          | 0          | 0          | 0.00 | 0.48663 |
| IPI00018192 | Isoform 1 of WD-repeat protein 74                                | WDR74    | WD repeat domain 74                          | Nucleus             | other                   | 0        | 0        | 1        | 0          | 1          | 1          | 0.00 | 0.48663 |
| IPI00019223 | Isoform 1 of A-kinase anchor protein 9                           | AKAP9    | A kinase (PRKA) anchor protein (yotiao) 9    | Cytoplasm           | other                   | 0        | 0        | 0        | 0          | 1          | 1          | 0.00 | 0.48663 |
| IPI00019447 | hypothetical protein LOC55215                                    | FANCI    | Fanconi anemia, complementation group        | Nucleus             | other                   | 2        | 1        | 2        | 2          | 1          | 2          | 0.00 | 0.48663 |
| IPI00019472 | Neutral amino acid transporter B(0)                              | SLC1A5   | solute carrier family 1 (neutral amino acid  | Plasma Membrane     | transporter             | 0        | 0        | 0        | 1          | 0          | 0          | 0.00 | 0.48663 |
| IPI00019540 | Isoform 4 of SAPS domain family member 3                         | PPP6R3   | protein phosphatase 6, regulatory subunit    | unknown             | other                   | 5        | 4        | 4        | 5          | 4          | 4          | 0.00 | 0.48663 |
| IPI00019912 | Peroxisomal multifunctional enzyme type 2                        | HSD17B4  | hydroxysteroid (17-beta) dehydrogenase       | Cytoplasm           | enzyme                  | 0        | 0        | 0        | 1          | 0          | 0          | 0.00 | 0.48663 |
| IPI00020042 | Isoform 1 of 26S protease regulatory subunit 6B                  | PSMC4    | proteasome (prosome, macropain) 26S su       | Nucleus             | peptidase               | 1        | 0        | 0        | 0          | 0          | 0          | 0.00 | 0.48663 |
| IPI00020101 | Histone H2B.a/g/h/k/l                                            |          |                                              |                     |                         | 0        | 0        | 0        | 1          | 1          | 0          | 0.00 | 0.48663 |
| IPI00020124 | Phosphatidylinositol 4-kinase type II                            | PI4K2A   | phosphatidylinositol 4-kinase type 2 alph.   | Cytoplasm           | kinase                  | 13       | 11       | 12       | 13         | 12         | 11         | 0.00 | 0.48663 |
| IPI00020194 | Isoform Short of TATA-binding protein-associated factor 2N       | TAF15    | TAF15 RNA polymerase II, TATA box binc       | Nucleus             | transcription regulator | 0        | 0        | 0        | 0          | 0          | 1          | 0.00 | 0.48663 |
| IPI00020827 | PNAS-117                                                         | MKKS     | McKusick-Kaufman syndrome                    | Cytoplasm           | other                   | 0        | 0        | 1        | 0          | 0          | 0          | 0.00 | 0.48663 |
| IPI00021048 | Isoform 1 of Myoferlin                                           | MYOF     | myoferlin                                    | Nucleus             | other                   | 4        | 3        | 2        | 3          | 3          | 3          | 0.00 | 0.48663 |
| IPI00021175 | Cell division cycle 2-related protein kinase 7                   | CDK12    | cyclin-dependent kinase 12                   | Nucleus             | kinase                  | 19       | 17       | 18       | 19         | 15         | 20         | 0.00 | 0.48663 |
| IPI00021305 | Cyclin-H                                                         | CCNH     | cyclin H                                     | Nucleus             | transcription regulator | 3        | 0        | 0        | 3          | 0          | 0          | 0.00 | 0.48663 |
| IPI00021439 | Actin, cytoplasmic 1                                             | ACTB     | actin, beta                                  | Cytoplasm           | other                   | 1        | 0        | 0        | 0          | 1          | 0          | 0.00 | 0.48663 |
| IPI00021840 | 40S ribosomal protein S6                                         | RPS6     | ribosomal protein S6                         | Cytoplasm           | other                   | 1        | 1        | 1        | 0          | 0          | 0          | 0.00 | 0.48663 |
| IPI00021907 | Isoform 1 of Myelin basic protein                                | MBP      | myelin basic protein                         | Extracellular Space | other                   | 1        | 1        | 0        | 1          | 0          | 1          | 0.00 | 0.48663 |
| IPI00021985 | Transmembrane 9 superfamily protein member 4                     | TM9SF4   | transmembrane 9 superfamily protein me       | Cytoplasm           | transporter             | 0        | 0        | 1        | 0          | 0          | 0          | 0.00 | 0.48663 |
| IPI00022020 | Type II inositol-3,4-bisphosphate 4-phosphatase                  | INPP4B   | inositol polyphosphate-4-phosphatase, ty     | unknown             | phosphatase             | 1        | 0        | 0        | 0          | 0          | 0          | 0.00 | 0.48663 |
| IPI00022305 | MSTP017                                                          | BZW2     | basic leucine zipper and W2 domains 2        | Cytoplasm           | translation regulator   | 1        | 0        | 0        | 0          | 0          | 0          | 0.00 | 0.48663 |
| IPI00022348 | Isoform PML-1 of Probable transcription factor PML               | PML      | promyelocytic leukemia                       | Nucleus             | transcription regulator | 3        | 4        | 0        | 4          | 0          | 3          | 0.00 | 0.48663 |
| IPI00022585 | Isoform 1 of A kinase anchor protein 1, mitochondrial precursor  | AKAP1    | A kinase (PRKA) anchor protein 1             | Cytoplasm           | other                   | 0        | 0        | 1        | 0          | 0          | 0          | 0.00 | 0.48663 |
| IPI00022613 | Isoform 1 of Probable nucleolar complex protein 14               | NOP14    | NOP14 nucleolar protein homolog (yeast)      | Nucleus             | other                   | 1        | 0        | 2        | 0          | 2          | 1          | 0.00 | 0.48663 |
| IPI00023095 | Myeloid leukemia factor 2                                        | MLF2     | myeloid leukemia factor 2                    | Nucleus             | other                   | 0        | 1        | 0        | 0          | 0          | 0          | 0.00 | 0.48663 |
| IPI00023234 | Ubiquitin-like 1-activating enzyme E1B                           | UBA2     | ubiquitin-like modifier activating enzyme    | Cytoplasm           | enzyme                  | 0        | 0        | 1        | 1          | 0          | 0          | 0.00 | 0.48663 |
| IPI00023322 | Zinc-finger protein ubi-d4                                       | DPF2     | D4, zinc and double PHD fingers family 2     | Nucleus             | other                   | 0        | 0        | 0        | 1          | 0          | 0          | 0.00 | 0.48663 |

**Supplemental Table 1. A list of all phosphorylated proteins identified in SNU216 and SNU216-LR.**

| Accession   | Identified Proteins                                                 | Symbol  | Entrez Gene Name                                                    | Location            | Type(s)                 | SNU216-1 | SNU216-2 | SNU216-3 | SNU216-LR1 | SNU216-LR2 | SNU216-LR3 | STN  | p-value |
|-------------|---------------------------------------------------------------------|---------|---------------------------------------------------------------------|---------------------|-------------------------|----------|----------|----------|------------|------------|------------|------|---------|
| IPI00023339 | CREB-binding protein                                                | CREBBP  | CREB binding protein                                                | Nucleus             | transcription regulator | 0        | 0        | 0        | 1          | 1          | 1          | 0.00 | 0.48663 |
| IPI00023340 | Histone acetyltransferase MYST3                                     | KAT6A   | K(lysine) acetyltransferase 6A                                      | Nucleus             | enzyme                  | 0        | 0        | 0        | 0          | 0          | 1          | 0.00 | 0.48663 |
| IPI00023344 | Isoform 1 of Symplekin                                              | SYMPK   | symplekin                                                           | Cytoplasm           | other                   | 5        | 3        | 4        | 7          | 0          | 4          | 0.00 | 0.48663 |
| IPI00024067 | clathrin heavy chain 1                                              | CLTC    | clathrin, heavy chain (Hc)                                          | Plasma Membrane     | other                   | 0        | 0        | 0        | 0          | 1          | 0          | 0.00 | 0.48663 |
| IPI00024145 | Isoform 1 of Voltage-dependent anion-selective channel protein      | VDAC2   | voltage-dependent anion channel 2                                   | Cytoplasm           | ion channel             | 0        | 0        | 0        | 0          | 0          | 1          | 0.00 | 0.48663 |
| IPI00024157 | FK506-binding protein 3                                             | FKBP3   | FK506 binding protein 3, 25kDa                                      | Nucleus             | enzyme                  | 1        | 1        | 1        | 0          | 1          | 1          | 0.00 | 0.48663 |
| IPI00024254 | Interferon-induced protein with tetratricopeptide repeats 3         | IFIT3   | interferon-induced protein with tetratricopeptide repeats 3         | Cytoplasm           | other                   | 0        | 0        | 0        | 1          | 0          | 0          | 0.00 | 0.48663 |
| IPI00024871 | core-binding factor, beta subunit isoform 1                         | CBFB    | core-binding factor, beta subunit                                   | Nucleus             | transcription regulator | 0        | 0        | 4        | 2          | 2          | 2          | 0.00 | 0.48663 |
| IPI00024933 | 60S ribosomal protein L12                                           | RPL12   | ribosomal protein L12                                               | Cytoplasm           | other                   | 0        | 0        | 0        | 1          | 1          | 0          | 0.00 | 0.48663 |
| IPI00024976 | Mitochondrial import receptor subunit TOM22 homolog                 | TOMM22  | translocase of outer mitochondrial membrane                         | Cytoplasm           | transporter             | 0        | 0        | 0        | 0          | 1          | 1          | 0.00 | 0.48663 |
| IPI00025058 | Isoform 3 of Double-stranded RNA-specific adenosine deaminase       | ADAR    | adenosine deaminase, RNA-specific                                   | Nucleus             | enzyme                  | 0        | 0        | 0        | 1          | 0          | 1          | 0.00 | 0.48663 |
| IPI00025366 | Citrate synthase, mitochondrial precursor                           | CS      | citrate synthase                                                    | Cytoplasm           | enzyme                  | 0        | 0        | 0        | 1          | 0          | 0          | 0.00 | 0.48663 |
| IPI00025721 | COP9 signalosome complex subunit 3                                  | COP3    | COP9 constitutive photomorphogenic homolog 3                        | Cytoplasm           | other                   | 0        | 1        | 0        | 0          | 0          | 0          | 0.00 | 0.48663 |
| IPI00026089 | Splicing factor 3B subunit 1                                        | SF3B1   | splicing factor 3b, subunit 1, 155kDa                               | Nucleus             | other                   | 6        | 3        | 2        | 4          | 2          | 5          | 0.00 | 0.48663 |
| IPI00026302 | 60S ribosomal protein L31                                           | RPL31   | ribosomal protein L31                                               | Cytoplasm           | other                   | 0        | 0        | 0        | 1          | 1          | 1          | 0.00 | 0.48663 |
| IPI00026665 | Glutaminyl-tRNA synthetase                                          | QARS    | glutaminyl-tRNA synthetase                                          | Cytoplasm           | enzyme                  | 1        | 0        | 0        | 1          | 1          | 1          | 0.00 | 0.48663 |
| IPI00026781 | Fatty acid synthase                                                 | FASN    | fatty acid synthase                                                 | Cytoplasm           | enzyme                  | 2        | 1        | 0        | 2          | 0          | 0          | 0.00 | 0.48663 |
| IPI00026813 | Protein farnesyltransferase/geranylgeranyltransferase type I alpha  | FNTA    | farnesyltransferase, CAAX box, alpha                                | Cytoplasm           | enzyme                  | 0        | 1        | 0        | 0          | 0          | 0          | 0.00 | 0.48663 |
| IPI00026970 | chromatin-specific transcription elongation factor large subunit    | SUPT16H | suppressor of Ty 16 homolog (S. cerevisiae)                         | Nucleus             | transcription regulator | 0        | 0        | 0        | 0          | 0          | 1          | 0.00 | 0.48663 |
| IPI00027078 | Carboxypeptidase D precursor                                        | CPD     | carboxypeptidase D                                                  | Extracellular Space | peptidase               | 3        | 4        | 3        | 4          | 0          | 5          | 0.00 | 0.48663 |
| IPI00027252 | Prohibitin-2                                                        | PHB2    | prohibitin 2                                                        | Cytoplasm           | transcription regulator | 1        | 0        | 1        | 0          | 0          | 0          | 0.00 | 0.48663 |
| IPI00027415 | DEAH (Asp-Glu-Ala-His) box polypeptide 36                           | DHX36   | DEAH (Asp-Glu-Ala-His) box polypeptide 36                           | unknown             | enzyme                  | 1        | 1        | 1        | 0          | 1          | 1          | 0.00 | 0.48663 |
| IPI00027726 | Isoform 1 of Krueppel-like factor 3                                 | KLF3    | Kruppel-like factor 3 (basic)                                       | Nucleus             | transcription regulator | 3        | 0        | 0        | 0          | 0          | 3          | 0.00 | 0.48663 |
| IPI00028005 | Nuclear pore complex protein Nup107                                 | NUP107  | nucleoporin 107kDa                                                  | Nucleus             | transporter             | 1        | 1        | 0        | 1          | 1          | 1          | 0.00 | 0.48663 |
| IPI00028083 | Translation initiation factor eIF-2B subunit beta                   | EIF2B2  | eukaryotic translation initiation factor 2B, subunit beta           | Cytoplasm           | translation regulator   | 0        | 0        | 1        | 0          | 0          | 0          | 0.00 | 0.48663 |
| IPI00028275 | Cytoskeleton-associated protein 5                                   | CKAP5   | cytoskeleton associated protein 5                                   | Nucleus             | other                   | 1        | 1        | 1        | 1          | 1          | 1          | 0.00 | 0.48663 |
| IPI00028307 | Hypothetical protein FLJ22346                                       | UBE2O   | ubiquitin-conjugating enzyme E2O                                    | unknown             | enzyme                  | 0        | 0        | 1        | 0          | 0          | 0          | 0.00 | 0.48663 |
| IPI00028359 | Hypothetical protein DKFZp761F0123                                  | SH3BP5L | SH3-binding domain protein 5-like                                   | unknown             | other                   | 1        | 0        | 0        | 0          | 0          | 0          | 0.00 | 0.48663 |
| IPI00028931 | Desmoglein 2, preproprotein                                         | DSG2    | desmoglein 2                                                        | Plasma Membrane     | other                   | 0        | 0        | 0        | 0          | 1          | 0          | 0.00 | 0.48663 |
| IPI00029012 | Eukaryotic translation initiation factor 3 subunit 10               | EIF3A   | eukaryotic translation initiation factor 3, subunit 10              | Cytoplasm           | translation regulator   | 0        | 0        | 0        | 1          | 0          | 1          | 0.00 | 0.48663 |
| IPI00029079 | GMP synthase                                                        | GMPS    | guanine monophosphate synthetase                                    | Nucleus             | enzyme                  | 1        | 0        | 1        | 1          | 1          | 1          | 0.00 | 0.48663 |
| IPI00029159 | Isoform 1 of Double-strand break repair protein MRE11A              | MRE11A  | MRE11 meiotic recombination 11 homolog                              | Nucleus             | enzyme                  | 2        | 0        | 1        | 2          | 1          | 0          | 0.00 | 0.48663 |
| IPI00029740 | sorting nexin 3 isoform a                                           | SNX3    | sorting nexin 3                                                     | Cytoplasm           | transporter             | 0        | 0        | 0        | 0          | 1          | 0          | 0.00 | 0.48663 |
| IPI00029764 | Splicing factor 3A subunit 3                                        | SF3A3   | splicing factor 3a, subunit 3, 60kDa                                | Nucleus             | other                   | 0        | 0        | 0        | 0          | 1          | 0          | 0.00 | 0.48663 |
| IPI00030781 | Isoform Alpha of Signal transducer and activator of transcription 1 | STAT1   | signal transducer and activator of transcription 1                  | Nucleus             | transcription regulator | 0        | 1        | 0        | 0          | 1          | 0          | 0.00 | 0.48663 |
| IPI00031015 | Histone RNA hairpin-binding protein                                 | SLBP    | stem-loop binding protein                                           | Nucleus             | other                   | 1        | 0        | 0        | 0          | 0          | 0          | 0.00 | 0.48663 |
| IPI00031517 | DNA replication licensing factor MCM6                               | MCM6    | minichromosome maintenance complex component 6                      | Nucleus             | enzyme                  | 1        | 0        | 1        | 0          | 1          | 0          | 0.00 | 0.48663 |
| IPI00031618 | DNA-damage inducible protein 2                                      | DDI2    | (includes DNA-damage inducible 1 homolog 2 (S. cerevisiae))         | Plasma Membrane     | transporter             | 0        | 0        | 1        | 0          | 0          | 0          | 0.00 | 0.48663 |
| IPI00031681 | Cell division protein kinase 2                                      | CDK2    | cyclin-dependent kinase 2                                           | Nucleus             | kinase                  | 1        | 2        | 0        | 2          | 1          | 1          | 0.00 | 0.48663 |
| IPI00032872 | 28S ribosomal protein S16, mitochondrial precursor                  | MRPS16  | (includes mitochondrial ribosomal protein S16)                      | Cytoplasm           | other                   | 0        | 1        | 1        | 1          | 0          | 0          | 0.00 | 0.48663 |
| IPI00032957 | Ubiquitin-conjugating enzyme E2 I                                   | UBE2I   | ubiquitin-conjugating enzyme E2I                                    | Nucleus             | enzyme                  | 0        | 0        | 0        | 1          | 0          | 0          | 0.00 | 0.48663 |
| IPI00033025 | Septin-7                                                            | SEPT7   | septin 7                                                            | Cytoplasm           | other                   | 1        | 1        | 0        | 1          | 1          | 1          | 0.00 | 0.48663 |
| IPI00033030 | Adhesion-regulating molecule 1 precursor                            | ADRM1   | adhesion regulating molecule 1                                      | Plasma Membrane     | other                   | 1        | 1        | 1        | 0          | 1          | 1          | 0.00 | 0.48663 |
| IPI00033561 | Isoform 1 of RNA-binding protein with serine-rich domain 1          | RNPS1   | RNA binding protein S1, serine-rich domain 1                        | Nucleus             | other                   | 0        | 0        | 0        | 1          | 0          | 0          | 0.00 | 0.48663 |
| IPI00033892 | Isoform 1 of Zinc finger protein 336                                | GZF1    | GDNF-inducible zinc finger protein 1                                | Nucleus             | other                   | 1        | 0        | 0        | 1          | 0          | 0          | 0.00 | 0.48663 |
| IPI00033907 | Anaphase-promoting complex subunit 1                                | ANAPC1  | anaphase promoting complex subunit 1                                | Nucleus             | other                   | 4        | 3        | 3        | 3          | 4          | 3          | 0.00 | 0.48663 |
| IPI00034049 | Isoform 1 of Regulator of nonsense transcripts 1                    | UPF1    | UPF1 regulator of nonsense transcripts homolog 1                    | Nucleus             | enzyme                  | 0        | 0        | 0        | 1          | 0          | 0          | 0.00 | 0.48663 |
| IPI00056504 | Ubiquitin-conjugating enzyme E2 E3                                  | UBE2E3  | ubiquitin-conjugating enzyme E2E 3                                  | Nucleus             | enzyme                  | 0        | 0        | 0        | 1          | 0          | 0          | 0.00 | 0.48663 |
| IPI00061087 | Protein C9orf42                                                     | FAM122A | family with sequence similarity 122A                                | unknown             | other                   | 2        | 2        | 0        | 0          | 3          | 0          | 0.00 | 0.48663 |
| IPI00062120 | Protein S100-A16                                                    | S100A16 | S100 calcium binding protein A16                                    | Nucleus             | other                   | 0        | 0        | 0        | 1          | 0          | 0          | 0.00 | 0.48663 |
| IPI00063242 | Bcl-XL-binding protein v68                                          | PGAM5   | phosphoglycerate mutase family member 5                             | Cytoplasm           | enzyme                  | 0        | 0        | 1        | 1          | 0          | 0          | 0.00 | 0.48663 |
| IPI00065276 | CDNA FLJ32841 fis, clone TESTI2003325                               | ASPSCR1 | alveolar soft part sarcoma chromosome region 1                      | Cytoplasm           | other                   | 0        | 1        | 0        | 0          | 1          | 0          | 0.00 | 0.48663 |
| IPI00066641 | Ubiquitin-like PHD and RING finger domain-containing protein 1      | UHRF1   | ubiquitin-like with PHD and ring finger domain-containing protein 1 | Nucleus             | transcription regulator | 2        | 2        | 0        | 0          | 2          | 2          | 0.00 | 0.48663 |
| IPI00069309 | Hypothetical protein DKFZp434K1815                                  | LRWD1   | leucine-rich repeats and WD repeat domain-containing protein 1      | Nucleus             | other                   | 11       | 11       | 11       | 12         | 9          | 12         | 0.00 | 0.48663 |

**Supplemental Table 1. A list of all phosphorylated proteins identified in SNU216 and SNU216-LR.**

| Accession   | Identified Proteins                                               | Symbol   | Entrez Gene Name                                | Location            | Type(s)                 | SNU216-1 | SNU216-2 | SNU216-3 | SNU216-LR1 | SNU216-LR2 | SNU216-LR3 | STN  | p-value |
|-------------|-------------------------------------------------------------------|----------|-------------------------------------------------|---------------------|-------------------------|----------|----------|----------|------------|------------|------------|------|---------|
| IPI00069693 | 23 kDa protein                                                    | RPL14    | ribosomal protein L14                           | Cytoplasm           | other                   | 1        | 3        | 2        | 3          | 2          | 0          | 0.00 | 0.48663 |
| IPI00075248 | Calmodulin                                                        |          |                                                 |                     |                         | 0        | 0        | 0        | 0          | 0          | 1          | 0.00 | 0.48663 |
| IPI00100673 | Charged multivesicular body protein 3                             | CHMP3    | charged multivesicular body protein 3           | Cytoplasm           | other                   | 0        | 1        | 0        | 0          | 0          | 0          | 0.00 | 0.48663 |
| IPI00100930 | Hypothetical protein C12orf43                                     | C12orf43 | chromosome 12 open reading frame 43             | unknown             | other                   | 1        | 0        | 1        | 0          | 0          | 0          | 0.00 | 0.48663 |
| IPI00102107 | Isoform 1 of Histone-lysine N-methyltransferase, H3 lysine-36 an  | NSD1     | nuclear receptor binding SET domain pro         | Nucleus             | transcription regulator | 2        | 0        | 0        | 2          | 0          | 0          | 0.00 | 0.48663 |
| IPI00102918 | Isoform 2 of ATR-interacting protein                              | ATRIP    | ATR interacting protein                         | Nucleus             | kinase                  | 4        | 0        | 0        | 4          | 0          | 0          | 0.00 | 0.48663 |
| IPI00103525 | Paraspeckle protein 1 alpha isoform                               | PSPC1    | paraspeckle component 1                         | Nucleus             | other                   | 0        | 0        | 0        | 1          | 1          | 0          | 0.00 | 0.48663 |
| IPI00106559 | Isoform 2 of Tax1-binding protein 1                               | TAX1BP1  | Tax1 (human T-cell leukemia virus type I)       | Cytoplasm           | other                   | 0        | 0        | 0        | 1          | 0          | 0          | 0.00 | 0.48663 |
| IPI00107113 | Isoform 1 of U3 small nucleolar RNA-associated protein 14 hom     | UTP14A   | UTP14, U3 small nucleolar ribonucleoprot        | Nucleus             | other                   | 4        | 4        | 3        | 3          | 3          | 5          | 0.00 | 0.48663 |
| IPI00141318 | P63 protein                                                       | CKAP4    | cytoskeleton-associated protein 4               | Cytoplasm           | other                   | 1        | 1        | 0        | 0          | 1          | 0          | 0.00 | 0.48663 |
| IPI00142716 | Dnal1 homology subfamily A member 5 isoform 2                     | DNAJC21  | Dnal1 (Hsp40) homolog, subfamily C, mem         | unknown             | other                   | 0        | 0        | 1        | 0          | 0          | 0          | 0.00 | 0.48663 |
| IPI00143753 | PREDICTED: U2-associated SR140 protein                            | U2SURP   | U2 snRNP-associated SURP domain cont            | Nucleus             | other                   | 0        | 0        | 0        | 1          | 0          | 0          | 0.00 | 0.48663 |
| IPI00150057 | Isoform 2 of SWI/SNF-related matrix-associated actin-dependent    | SMARCC2  | SWI/SNF related, matrix associated, actin       | Nucleus             | transcription regulator | 5        | 9        | 8        | 9          | 6          | 7          | 0.00 | 0.48663 |
| IPI00152542 | Protein Dmx-like 2                                                | DMXL2    | Dmx-like 2                                      | Cytoplasm           | other                   | 0        | 1        | 0        | 0          | 0          | 0          | 0.00 | 0.48663 |
| IPI00152671 | hypothetical protein LOC157769                                    | FAM91A1  | family with sequence similarity 91, memb        | unknown             | other                   | 1        | 1        | 1        | 0          | 0          | 0          | 0.00 | 0.48663 |
| IPI00152701 | Hypothetical protein FLJ23660                                     | PLCD3    | phospholipase C, delta 3                        | unknown             | enzyme                  | 0        | 2        | 0        | 0          | 0          | 2          | 0.00 | 0.48663 |
| IPI00154975 | Dnal1 homology subfamily C member 9                               | DNAJC9   | Dnal1 (Hsp40) homolog, subfamily C, mem         | unknown             | other                   | 0        | 0        | 0        | 0          | 1          | 1          | 0.00 | 0.48663 |
| IPI00156689 | Synaptic vesicle membrane protein VAT-1 homolog                   | VAT1     | vesicle amine transport protein 1 homolo        | Plasma Membrane     | transporter             | 0        | 0        | 1        | 0          | 0          | 0          | 0.00 | 0.48663 |
| IPI00157757 | Isoform 1 of NEDD9-interacting protein with calponin homology     | MICAL1   | microtubule associated monooxygenase, c         | Cytoplasm           | enzyme                  | 1        | 0        | 1        | 0          | 0          | 0          | 0.00 | 0.48663 |
| IPI00158020 | Isoform 1 of Putative splicing factor, arginine/serine-rich 14    | SUGP2    | SURP and G patch domain containing 2            | Nucleus             | other                   | 0        | 0        | 0        | 0          | 0          | 1          | 0.00 | 0.48663 |
| IPI00159899 | Ankyrin repeat and FYVE domain-containing protein 1               | ANKFY1   | ankyrin repeat and FYVE domain containi         | Nucleus             | transcription regulator | 1        | 0        | 1        | 0          | 1          | 0          | 0.00 | 0.48663 |
| IPI00160265 | Isoform 2 of Trinucleotide repeat-containing gene 6A protein      | TNRC6A   | trinucleotide repeat containing 6A              | Nucleus             | other                   | 0        | 0        | 0        | 1          | 0          | 0          | 0.00 | 0.48663 |
| IPI00163644 | Oxysterol-binding protein                                         | OSBPL8   | oxysterol binding protein-like 8                | Cytoplasm           | other                   | 1        | 0        | 0        | 0          | 0          | 0          | 0.00 | 0.48663 |
| IPI00164481 | Isoform 2 of Double-stranded RNA-binding protein Staufen hom      | STAU2    | staufen, RNA binding protein, homolog 2         | Cytoplasm           | other                   | 1        | 1        | 0        | 0          | 0          | 0          | 0.00 | 0.48663 |
| IPI00164951 | P40                                                               |          |                                                 |                     |                         | 0        | 2        | 2        | 3          | 0          | 0          | 0.00 | 0.48663 |
| IPI00165547 | Isoform 2 of Phosphatidylinositol 4-kinase beta                   | PI4KB    | phosphatidylinositol 4-kinase, catalytic, b     | Cytoplasm           | kinase                  | 3        | 2        | 3        | 2          | 3          | 3          | 0.00 | 0.48663 |
| IPI00165946 | Isoform 2 of Membrane-associated guanylate kinase, WW and PI      | MAG11    | (includ membrane associated guanylate kinase, V | Plasma Membrane     | kinase                  | 1        | 0        | 0        | 0          | 0          | 0          | 0.00 | 0.48663 |
| IPI00168336 | CDNA FLJ90478 fis, clone NT2RP3002790                             | LEM2     | LEM domain containing 2                         | Nucleus             | other                   | 0        | 2        | 2        | 2          | 2          | 1          | 0.00 | 0.48663 |
| IPI00168388 | Isoform 1 of Signal recognition particle 68 kDa protein           | SRP68    | (includ signal recognition particle 68kDa       | Nucleus             | other                   | 0        | 0        | 0        | 0          | 1          | 0          | 0.00 | 0.48663 |
| IPI00169345 | Protein NEDD1                                                     | NEDD1    | neural precursor cell expressed, developn       | Cytoplasm           | other                   | 2        | 0        | 0        | 2          | 0          | 0          | 0.00 | 0.48663 |
| IPI00169383 | Phosphoglycerate kinase 1                                         | PGK1     | phosphoglycerate kinase 1                       | Cytoplasm           | kinase                  | 0        | 0        | 0        | 0          | 0          | 1          | 0.00 | 0.48663 |
| IPI00170786 | WW domain-binding protein 11                                      | WBP11    | WW domain binding protein 11                    | Nucleus             | phosphatase             | 1        | 3        | 2        | 3          | 2          | 1          | 0.00 | 0.48663 |
| IPI00171390 | CDNA FLJ34719 fis, clone MESAN2005689, weakly similar to SPL      | PRPF38A  | PRP38 pre-mRNA processing factor 38 (y          | Nucleus             | other                   | 1        | 1        | 1        | 1          | 1          | 1          | 0.00 | 0.48663 |
| IPI00171411 | Golgi phosphoprotein 2                                            | GOLM1    | golgi membrane protein 1                        | Cytoplasm           | other                   | 1        | 0        | 1        | 0          | 0          | 0          | 0.00 | 0.48663 |
| IPI00171798 | Metastasis-associated protein MTA2                                | MTA2     | metastasis associated 1 family, member 2        | Nucleus             | transcription regulator | 3        | 1        | 2        | 2          | 1          | 3          | 0.00 | 0.48663 |
| IPI00174025 | Isoform 1 of Dynammin-binding protein                             | DNMBP    | dynammin binding protein                        | Cytoplasm           | other                   | 1        | 1        | 0        | 0          | 0          | 0          | 0.00 | 0.48663 |
| IPI00174390 | 2'-phosphodiesterase                                              | PDE12    | phosphodiesterase 12                            | Cytoplasm           | other                   | 0        | 0        | 0        | 1          | 0          | 1          | 0.00 | 0.48663 |
| IPI00174976 | Isoform 1 of MAGUK p55 subfamily member 5                         | MPP5     | membrane protein, palmitoylated 5 (MAC          | Plasma Membrane     | kinase                  | 0        | 0        | 0        | 0          | 1          | 1          | 0.00 | 0.48663 |
| IPI00175136 | RNA binding motif protein 15B                                     | RBM15B   | RNA binding motif protein 15B                   | Nucleus             | other                   | 8        | 4        | 6        | 6          | 7          | 5          | 0.00 | 0.48663 |
| IPI00175169 | Isoform 1 of ADP-ribosylation factor GTPase-activating protein 1  | ARFGAP1  | ADP-ribosylation factor GTPase activating       | Cytoplasm           | transporter             | 0        | 6        | 5        | 0          | 7          | 4          | 0.00 | 0.48663 |
| IPI00179057 | Isoform 1 of Cullin-4B                                            | CUL4B    | cullin 4B                                       | unknown             | other                   | 1        | 0        | 0        | 0          | 1          | 1          | 0.00 | 0.48663 |
| IPI00180707 | Isoform 1 of FRAS1-related extracellular matrix protein 2 precurs | FREM2    | FRAS1 related extracellular matrix protein      | Extracellular Space | other                   | 1        | 0        | 0        | 0          | 0          | 0          | 0.00 | 0.48663 |
| IPI00181586 | PQ loop repeat containing 1                                       | PQLC1    | PQ loop repeat containing 1                     | unknown             | other                   | 0        | 0        | 0        | 0          | 1          | 0          | 0.00 | 0.48663 |
| IPI00181702 | Isoform 1 of Splicing factor, arginine/serine-rich 15             | SCAF4    | SR-related CTD-associated factor 4              | Nucleus             | other                   | 9        | 7        | 8        | 10         | 7          | 7          | 0.00 | 0.48663 |
| IPI00181728 | Brix domain-containing protein 2                                  | BRIX1    | BRX1, biogenesis of ribosomes, homolog          | Nucleus             | other                   | 1        | 0        | 0        | 0          | 0          | 0          | 0.00 | 0.48663 |
| IPI00181893 | Isoform 4 of Phosphorylase b kinase beta regulatory chain         | PHKB     | phosphorylase kinase, beta                      | Cytoplasm           | kinase                  | 0        | 0        | 0        | 0          | 0          | 0          | 0.00 | 0.48663 |
| IPI00182289 | 40S ribosomal protein S29                                         | RPS29    | ribosomal protein S29                           | Cytoplasm           | other                   | 1        | 0        | 0        | 0          | 0          | 0          | 0.00 | 0.48663 |
| IPI00183530 | CDNA FLJ46302 fis, clone TEST14036048, highly similar to Sorting  | SNX1     | sorting nexin 1                                 | Cytoplasm           | transporter             | 0        | 0        | 0        | 0          | 1          | 0          | 0.00 | 0.48663 |
| IPI00185374 | 26S proteasome non-ATPase regulatory subunit 12                   | PSMD12   | proteasome (prosome, macropain) 26S su          | Cytoplasm           | other                   | 0        | 0        | 0        | 0          | 1          | 0          | 0.00 | 0.48663 |
| IPI00186139 | hypothetical protein LOC65095 isoform 1                           | KRI1     | KRI1 homolog (S. cerevisiae)                    | unknown             | other                   | 10       | 10       | 10       | 10         | 11         | 9          | 0.00 | 0.48663 |
| IPI00215719 | 60S ribosomal protein L18                                         | RPL18    | ribosomal protein L18                           | Cytoplasm           | other                   | 0        | 0        | 0        | 0          | 1          | 0          | 0.00 | 0.48663 |
| IPI00215888 | Signal recognition particle 72 kDa protein                        | SRP72    | (includ signal recognition particle 72kDa       | Nucleus             | kinase                  | 0        | 0        | 1        | 0          | 0          | 0          | 0.00 | 0.48663 |
| IPI00216135 | Isoform 3 of Tropomyosin 1 alpha chain                            | TPM1     | (includ tropomyosin 1 (alpha)                   | Cytoplasm           | other                   | 0        | 0        | 0        | 0          | 1          | 1          | 0.00 | 0.48663 |
| IPI00216682 | Calponin-3                                                        | CNN3     | calponin 3, acidic                              | Cytoplasm           | other                   | 1        | 0        | 0        | 0          | 0          | 0          | 0.00 | 0.48663 |

**Supplemental Table 1. A list of all phosphorylated proteins identified in SNU216 and SNU216-LR.**

| Accession   | Identified Proteins                                                  | Symbol    | Entrez Gene Name                                        | Location            | Type(s)                 | SNU216-1 | SNU216-2 | SNU216-3 | SNU216-LR1 | SNU216-LR2 | SNU216-LR3 | STN  | p-value |
|-------------|----------------------------------------------------------------------|-----------|---------------------------------------------------------|---------------------|-------------------------|----------|----------|----------|------------|------------|------------|------|---------|
| IPI00217104 | Melanoma-associated antigen G1                                       | NDNL2     | necdin-like 2                                           | Nucleus             | other                   | 1        | 1        | 1        | 0          | 1          | 1          | 0.00 | 0.48663 |
| IPI00217240 | WD-repeat protein 75                                                 | WDR75     | WD repeat domain 75                                     | Nucleus             | other                   | 0        | 4        | 6        | 4          | 4          | 3          | 0.00 | 0.48663 |
| IPI00217466 | Histone H1.3                                                         | HIST1H1D  | histone cluster 1, H1d                                  | Nucleus             | other                   | 0        | 0        | 1        | 0          | 0          | 0          | 0.00 | 0.48663 |
| IPI00217841 | EPB41L5 protein                                                      | EPB41L5   | erythrocyte membrane protein band 4.1                   | Plasma Membrane     | other                   | 0        | 0        | 0        | 1          | 0          | 0          | 0.00 | 0.48663 |
| IPI00217943 | Isoform 2 of Ras-related protein Rab-6A                              | RAB6A     | RAB6A, member RAS oncogene family                       | Cytoplasm           | enzyme                  | 0        | 0        | 0        | 1          | 0          | 0          | 0.00 | 0.48663 |
| IPI00218490 | Isoform 2 of Kinesin-like protein KIF13A                             | KIF13A    | kinesin family member 13A                               | Cytoplasm           | transporter             | 0        | 0        | 0        | 1          | 0          | 0          | 0.00 | 0.48663 |
| IPI00219012 | Proto-oncogene tyrosine-protein kinase Fyn                           | FYN       | FYN oncogene related to SRC, FGR, YES                   | Plasma Membrane     | kinase                  | 0        | 0        | 0        | 1          | 0          | 0          | 0.00 | 0.48663 |
| IPI00219114 | Isoform p135 of Dynactin-1                                           | DCTN1     | dynactin 1                                              | Cytoplasm           | other                   | 0        | 0        | 0        | 1          | 0          | 0          | 0.00 | 0.48663 |
| IPI00219147 | Isoform 2 of DNA-binding protein A                                   | CSDA      | cold shock domain protein A                             | Nucleus             | transcription regulator | 1        | 0        | 1        | 0          | 0          | 1          | 0.00 | 0.48663 |
| IPI00219340 | Isoform 2 of Dual specificity protein kinase CLK3                    | CLK3      | CDC-like kinase 3                                       | Nucleus             | kinase                  | 0        | 0        | 3        | 0          | 3          | 0          | 0.00 | 0.48663 |
| IPI00219420 | Structural maintenance of chromosomes 3                              | SMC3      | structural maintenance of chromosomes 3                 | Nucleus             | other                   | 9        | 7        | 8        | 9          | 8          | 7          | 0.00 | 0.48663 |
| IPI00219446 | Phosphatidylethanolamine-binding protein 1                           | PEBP1     | phosphatidylethanolamine binding protein 1              | Cytoplasm           | other                   | 0        | 0        | 1        | 1          | 1          | 1          | 0.00 | 0.48663 |
| IPI00219604 | Dual specificity mitogen-activated protein kinase kinase 1           | MAP2K1    | mitogen-activated protein kinase kinase 1               | Cytoplasm           | kinase                  | 0        | 0        | 0        | 1          | 0          | 0          | 0.00 | 0.48663 |
| IPI00219675 | Isoform B of Ras-related C3 botulinum toxin substrate 1 precursor    | RAC1      | ras-related C3 botulinum toxin substrate 1              | Plasma Membrane     | enzyme                  | 1        | 1        | 1        | 1          | 1          | 1          | 0.00 | 0.48663 |
| IPI00220038 | Isoform B of Arsenite-resistance protein 2                           | SRRT      | serrate RNA effector molecule homolog                   | Nucleus             | other                   | 3        | 4        | 3        | 4          | 2          | 4          | 0.00 | 0.48663 |
| IPI00220317 | DNA polymerase alpha catalytic subunit                               | POLA1     | polymerase (DNA directed), alpha 1, catalytic           | Nucleus             | enzyme                  | 2        | 2        | 0        | 3          | 1          | 0          | 0.00 | 0.48663 |
| IPI00220349 | eukaryotic translation initiation factor 2C, 2                       | EIF2C2    | eukaryotic translation initiation factor 2C, 2          | Cytoplasm           | translation regulator   | 0        | 0        | 0        | 0          | 1          | 0          | 0.00 | 0.48663 |
| IPI00220834 | ATP-dependent DNA helicase 2 subunit 2                               | XRC5      | X-ray repair complementing defective replication 5      | Nucleus             | enzyme                  | 0        | 1        | 0        | 0          | 0          | 0          | 0.00 | 0.48663 |
| IPI00220993 | Isoform CNPI of 2',3'-cyclic-nucleotide 3'-phosphodiesterase         | CNP       | 2',3'-cyclic nucleotide 3' phosphodiesterase            | Cytoplasm           | enzyme                  | 0        | 0        | 0        | 1          | 1          | 1          | 0.00 | 0.48663 |
| IPI00221232 | Guanine nucleotide-binding protein G(i)/G(s)/G(o) gamma-12 subunit 2 | GNG12     | guanine nucleotide binding protein (G protein)          | Plasma Membrane     | enzyme                  | 1        | 1        | 1        | 1          | 1          | 1          | 0.00 | 0.48663 |
| IPI00242962 | KIAA1618 protein (Fragment)                                          | RNF213    | ring finger protein 213                                 | Plasma Membrane     | other                   | 2        | 0        | 2        | 1          | 3          | 0          | 0.00 | 0.48663 |
| IPI00246058 | PDCD6IP protein                                                      | PDCD6IP   | programmed cell death 6 interacting protein 1           | Cytoplasm           | other                   | 0        | 0        | 0        | 0          | 1          | 0          | 0.00 | 0.48663 |
| IPI00253323 | hypothetical protein LOC65124                                        | ANKRD57   | ankyrin repeat domain 57                                | Nucleus             | transcription regulator | 0        | 0        | 1        | 0          | 0          | 0          | 0.00 | 0.48663 |
| IPI00256684 | Isoform B of AP-2 complex subunit alpha-1                            | AP2A1     | adaptor-related protein complex 2, alpha 1              | Cytoplasm           | transporter             | 1        | 0        | 0        | 0          | 1          | 1          | 0.00 | 0.48663 |
| IPI00289086 | Isoform 1 of Protein C20orf112                                       | C20orf112 | chromosome 20 open reading frame 112                    | unknown             | other                   | 1        | 1        | 0        | 1          | 1          | 1          | 0.00 | 0.48663 |
| IPI00289907 | forty-two-three domain containing 1 isoform 1                        | FYTTD1    | forty-two-three domain containing 1                     | Nucleus             | other                   | 4        | 3        | 2        | 4          | 0          | 4          | 0.00 | 0.48663 |
| IPI00290204 | Isoform 1 of U1 small nuclear ribonucleoprotein 70 kDa               | SNRNP70   | small nuclear ribonucleoprotein 70kDa                   | Nucleus             | other                   | 3        | 4        | 0        | 4          | 2          | 2          | 0.00 | 0.48663 |
| IPI00290305 | TP53-regulating kinase                                               | TP53RK    | TP53 regulating kinase                                  | Nucleus             | kinase                  | 1        | 0        | 0        | 0          | 0          | 0          | 0.00 | 0.48663 |
| IPI00290461 | Eukaryotic translation initiation factor 3 subunit 1                 | EIF3J     | eukaryotic translation initiation factor 3, subunit 3   | Cytoplasm           | translation regulator   | 1        | 0        | 0        | 0          | 0          | 1          | 0.00 | 0.48663 |
| IPI00290566 | T-complex protein 1 subunit alpha                                    | TCP1      | t-complex 1                                             | Cytoplasm           | other                   | 0        | 0        | 0        | 0          | 0          | 1          | 0.00 | 0.48663 |
| IPI00291005 | Malate dehydrogenase, cytoplasmic                                    | MDH1      | malate dehydrogenase 1, NAD (soluble)                   | Cytoplasm           | enzyme                  | 0        | 0        | 0        | 1          | 0          | 0          | 0.00 | 0.48663 |
| IPI00291016 | NADH-ubiquinone oxidoreductase flavoprotein 3 isoform precursor      | NDUFB3    | NADH dehydrogenase (ubiquinone) flavoprotein 3          | Cytoplasm           | enzyme                  | 0        | 1        | 0        | 1          | 0          | 0          | 0.00 | 0.48663 |
| IPI00291510 | Inosine 5'-monophosphate dehydrogenase 2                             | IMPDH2    | IMP (inosine 5'-monophosphate) dehydrogenase 2          | Cytoplasm           | enzyme                  | 1        | 0        | 0        | 1          | 0          | 0          | 0.00 | 0.48663 |
| IPI00291646 | methylenetetrahydrofolate dehydrogenase (NADP+ dependent) 1          | MTHFD1L   | methylenetetrahydrofolate dehydrogenase 1-like          | Cytoplasm           | enzyme                  | 0        | 0        | 0        | 1          | 0          | 0          | 0.00 | 0.48663 |
| IPI00291930 | Isoform 1 of Epsin-4                                                 | CLINT1    | clathrin interactor 1                                   | Cytoplasm           | other                   | 2        | 4        | 2        | 3          | 4          | 0          | 0.00 | 0.48663 |
| IPI00293338 | SMC5 structural maintenance of chromosomes 5-like 1                  | SMC5      | structural maintenance of chromosomes 5-like 1          | Nucleus             | other                   | 0        | 0        | 0        | 1          | 0          | 0          | 0.00 | 0.48663 |
| IPI00293655 | ATP-dependent RNA helicase DDX1                                      | DDX1      | DEAD (Asp-Glu-Ala-Asp) box polypeptide 1                | Nucleus             | enzyme                  | 1        | 0        | 0        | 1          | 1          | 0          | 0.00 | 0.48663 |
| IPI00294603 | Zinc finger protein 198                                              | ZMYM2     | zinc finger, MYM-type 2                                 | Nucleus             | other                   | 0        | 0        | 0        | 0          | 0          | 1          | 0.00 | 0.48663 |
| IPI00296078 | zinc finger transcription factor TRPS1                               | TRPS1     | trichorhinophalangeal syndrome 1                        | Nucleus             | transcription regulator | 1        | 1        | 1        | 0          | 0          | 0          | 0.00 | 0.48663 |
| IPI00296362 | Isoform 1 of Abnormal spindle-like microcephaly-associated protein   | ASPM      | asp (abnormal spindle) homolog, microcephaly-associated | Nucleus             | other                   | 0        | 0        | 0        | 0          | 0          | 1          | 0.00 | 0.48663 |
| IPI00296907 | Isoform 1 of Acyl-coenzyme A oxidase 1, peroxisomal                  | ACO1      | acyl-CoA oxidase 1, palmitoyl                           | Cytoplasm           | enzyme                  | 1        | 1        | 1        | 0          | 1          | 1          | 0.00 | 0.48663 |
| IPI00297452 | TRK-fused gene/anaplastic large cell lymphoma kinase extra long      | TFG       | TRK-fused gene                                          | Cytoplasm           | other                   | 0        | 0        | 0        | 1          | 0          | 0          | 0.00 | 0.48663 |
| IPI00297477 | U2 small nuclear ribonucleoprotein A'                                | SNRPA1    | small nuclear ribonucleoprotein polypeptide A1          | Nucleus             | other                   | 0        | 0        | 1        | 0          | 1          | 1          | 0.00 | 0.48663 |
| IPI00297851 | chromodomain helicase DNA binding protein 1                          | CHD1      | chromodomain helicase DNA binding protein 1             | Nucleus             | enzyme                  | 2        | 3        | 0        | 2          | 2          | 2          | 0.00 | 0.48663 |
| IPI00297931 | Isoform 1 of AP1 gamma subunit-binding protein 1                     | SYNRG     | synergin, gamma                                         | Cytoplasm           | other                   | 3        | 3        | 0        | 3          | 3          | 0          | 0.00 | 0.48663 |
| IPI00298057 | Periplakin                                                           | PPL       | periplakin                                              | Cytoplasm           | other                   | 2        | 2        | 2        | 2          | 2          | 2          | 0.00 | 0.48663 |
| IPI00298058 | Isoform 1 of Transcription elongation factor SPT5                    | SUPT5H    | suppressor of Ty 5 homolog (S. cerevisiae)              | Nucleus             | transcription regulator | 0        | 1        | 0        | 0          | 1          | 0          | 0.00 | 0.48663 |
| IPI00298618 | CDNA FLJ36810 fis. clone ASTRO2001249                                | EIF1AD    | eukaryotic translation initiation factor 1A             | unknown             | other                   | 0        | 0        | 0        | 1          | 0          | 0          | 0.00 | 0.48663 |
| IPI00298731 | Serine/threonine-protein phosphatase 1 regulatory subunit 10         | PPP1R10   | protein phosphatase 1, regulatory subunit 10            | Nucleus             | other                   | 2        | 4        | 4        | 3          | 4          | 3          | 0.00 | 0.48663 |
| IPI00298870 | Transmembrane protein 1                                              | TRAPP3    | trafficking protein particle complex 10                 | Cytoplasm           | transporter             | 1        | 0        | 0        | 0          | 0          | 0          | 0.00 | 0.48663 |
| IPI00299024 | Brain acid soluble protein 1                                         | BASP1     | brain abundant, membrane attached signaling protein 1   | Nucleus             | transcription regulator | 0        | 0        | 0        | 1          | 1          | 0          | 0.00 | 0.48663 |
| IPI00299417 | Protein C22orf19                                                     | THOC5     | THO complex 5                                           | Cytoplasm           | other                   | 4        | 2        | 2        | 3          | 3          | 2          | 0.00 | 0.48663 |
| IPI00299547 | Neutrophil gelatinase-associated lipocalin precursor                 | LCN2      | lipocalin 2                                             | Extracellular Space | transporter             | 0        | 0        | 1        | 0          | 0          | 0          | 0.00 | 0.48663 |
| IPI00299608 | Isoform 1 of 26S proteasome non-ATPase regulatory subunit 1          | PSMD1     | proteasome (prosome, macropain) 26S subunit 1           | Cytoplasm           | other                   | 4        | 1        | 3        | 2          | 3          | 3          | 0.00 | 0.48663 |

**Supplemental Table 1. A list of all phosphorylated proteins identified in SNU216 and SNU216-LR.**

| Accession   | Identified Proteins                                             | Symbol       | Entrez Gene Name                           | Location        | Type(s)                 | SNU216-1 | SNU216-2 | SNU216-3 | SNU216-LR1 | SNU216-LR2 | SNU216-LR3 | STN  | p-value |
|-------------|-----------------------------------------------------------------|--------------|--------------------------------------------|-----------------|-------------------------|----------|----------|----------|------------|------------|------------|------|---------|
| IPI00299904 | Isoform 1 of DNA replication licensing factor MCM7              | MCM7         | minichromosome maintenance complex c       | Nucleus         | enzyme                  | 1        | 1        | 1        | 1          | 0          | 0          | 0.00 | 0.48663 |
| IPI00300127 | N-acetyltransferase-like protein                                | NAT10        | N-acetyltransferase 10 (GCN5-related)      | Nucleus         | enzyme                  | 0        | 0        | 0        | 0          | 0          | 1          | 0.00 | 0.48663 |
| IPI00300562 | Ras-related protein Rab-3B                                      | RAB3B        | RAB3B, member RAS oncogene family          | Cytoplasm       | enzyme                  | 0        | 0        | 0        | 1          | 0          | 0          | 0.00 | 0.48663 |
| IPI00300956 | Isoform 1 of Ribonuclease III                                   | DROSHA       | droscha, ribonuclease type III             | Nucleus         | enzyme                  | 0        | 0        | 0        | 1          | 0          | 0          | 0.00 | 0.48663 |
| IPI00301109 | Isoform 1 of Inorganic pyrophosphatase 2, mitochondrial precurs | PPA2 (includ | pyrophosphatase (inorganic) 2              | Cytoplasm       | enzyme                  | 1        | 0        | 1        | 0          | 0          | 0          | 0.00 | 0.48663 |
| IPI00301936 | ELAV-like protein 1                                             | ELAVL1       | ELAV (embryonic lethal, abnormal vision,   | Cytoplasm       | other                   | 1        | 1        | 0        | 1          | 1          | 1          | 0.00 | 0.48663 |
| IPI00302149 | Isoform 1 of Polyhomeotic-like protein 3                        | PHC3         | polyhomeotic homolog 3 (Drosophila)        | Nucleus         | other                   | 6        | 0        | 5        | 6          | 0          | 5          | 0.00 | 0.48663 |
| IPI00302151 | Hypothetical protein CCDC87                                     | CCDC87       | coiled-coil domain containing 87           | unknown         | other                   | 0        | 1        | 0        | 0          | 0          | 0          | 0.00 | 0.48663 |
| IPI00302990 | WD-repeat protein 55                                            | WDR55        | WD repeat domain 55                        | Nucleus         | other                   | 0        | 1        | 0        | 0          | 0          | 0          | 0.00 | 0.48663 |
| IPI00303722 | Hypothetical protein FLJ14668                                   | FAM136A      | family with sequence similarity 136, mem   | Cytoplasm       | other                   | 0        | 0        | 0        | 0          | 0          | 1          | 0.00 | 0.48663 |
| IPI00304596 | Non-POU domain-containing octamer-binding protein               | NONO         | non-POU domain containing, octamer-bir     | Nucleus         | other                   | 1        | 1        | 1        | 1          | 1          | 0          | 0.00 | 0.48663 |
| IPI00305068 | U5 snRNP-associated 102 kDa protein                             | PRPF6        | PRP6 pre-mRNA processing factor 6 hom      | Nucleus         | transcription regulator | 0        | 0        | 0        | 0          | 1          | 0          | 0.00 | 0.48663 |
| IPI00305374 | THO complex subunit 1                                           | THOC1        | THO complex 1                              | Nucleus         | transcription regulator | 4        | 1        | 1        | 2          | 2          | 2          | 0.00 | 0.48663 |
| IPI00305589 | Isoform 1 of 6-phosphofructo-2-kinase/fructose-2,6-biphosphata  | PFKFB2       | 6-phosphofructo-2-kinase/fructose-2,6-bij  | Cytoplasm       | kinase                  | 0        | 4        | 5        | 4          | 5          | 0          | 0.00 | 0.48663 |
| IPI00306043 | Isoform 1 of YTH domain protein 2                               | YTHDF2       | YTH domain family, member 2                | unknown         | other                   | 0        | 0        | 0        | 1          | 0          | 0          | 0.00 | 0.48663 |
| IPI00306195 | CDNA FLJ30949 fis, clone HCASM1000021, weakly similar to Plas   | AKT1S1       | AKT1 substrate 1 (proline-rich)            | Cytoplasm       | other                   | 5        | 6        | 6        | 5          | 6          | 6          | 0.00 | 0.48663 |
| IPI00306332 | 60S ribosomal protein L24                                       | RPL24        | ribosomal protein L24                      | Cytoplasm       | other                   | 0        | 0        | 1        | 0          | 0          | 0          | 0.00 | 0.48663 |
| IPI00306382 | Isoform 1 of Secretory carrier-associated membrane protein 3    | SCAMP3       | secretory carrier membrane protein 3       | Cytoplasm       | transporter             | 0        | 0        | 0        | 0          | 0          | 1          | 0.00 | 0.48663 |
| IPI00306749 | Kanadaplin                                                      | SLC4A1AP     | solute carrier family 4 (anion exchanger), | Cytoplasm       | transporter             | 8        | 8        | 7        | 6          | 8          | 9          | 0.00 | 0.48663 |
| IPI00306840 | Sphingosine-1-phosphate phosphatase 1                           | SGPP1        | sphingosine-1-phosphate phosphatase 1      | Cytoplasm       | phosphatase             | 6        | 5        | 7        | 4          | 6          | 8          | 0.00 | 0.48663 |
| IPI00307733 | huntingtin interacting protein B                                | SETD2        | SET domain containing 2                    | Cytoplasm       | enzyme                  | 5        | 4        | 5        | 5          | 6          | 3          | 0.00 | 0.48663 |
| IPI00328306 | Zinc finger CCCH-type domain-containing protein 11A             |              |                                            |                 |                         | 3        | 0        | 3        | 3          | 0          | 3          | 0.00 | 0.48663 |
| IPI00328307 | Long chain polyunsaturated fatty acid elongation enzyme         | ELOVL5       | ELOVL fatty acid elongase 5                | Cytoplasm       | enzyme                  | 0        | 0        | 0        | 0          | 0          | 1          | 0.00 | 0.48663 |
| IPI00328688 | Isoform 1 of Sex comb on midleg-like protein 2                  | SCML2        | sex comb on midleg-like 2 (Drosophila)     | Nucleus         | transcription regulator | 0        | 0        | 0        | 0          | 1          | 0          | 0.00 | 0.48663 |
| IPI00328905 | 185 kDa protein                                                 | IQGAP3       | IQ motif containing GTPase activating prc  | Plasma Membrane | other                   | 4        | 5        | 5        | 5          | 5          | 4          | 0.00 | 0.48663 |
| IPI00333010 | SR-related CTD associated factor 6                              | CHERP        | calcium homeostasis endoplasmic reticul    | Cytoplasm       | other                   | 1        | 0        | 0        | 0          | 1          | 0          | 0.00 | 0.48663 |
| IPI00333913 | neuroblastoma-amplified protein                                 | NBAS         | neuroblastoma amplified sequence           | unknown         | other                   | 0        | 0        | 0        | 0          | 1          | 0          | 0.00 | 0.48663 |
| IPI00334190 | Stomatin-like protein 2                                         | STOML2       | stomatin (EPB72)-like 2                    | Plasma Membrane | other                   | 1        | 1        | 1        | 1          | 1          | 1          | 0.00 | 0.48663 |
| IPI00336000 | Isoform 6 of Zinc finger CCHC domain-containing protein 6       | ZCCHC6       | zinc finger, CCHC domain containing 6      | unknown         | enzyme                  | 1        | 0        | 0        | 0          | 0          | 0          | 0.00 | 0.48663 |
| IPI00337741 | Acylamino-acid-releasing enzyme                                 | APEH         | N-acylaminoacyl-peptide hydrolase          | Cytoplasm       | peptidase               | 0        | 0        | 0        | 1          | 0          | 0          | 0.00 | 0.48663 |
| IPI00339381 | Isoform 1 of SWI/SNF-related matrix-associated actin-dependent  | HLTF         | helicase-like transcription factor         | Nucleus         | transcription regulator | 0        | 0        | 0        | 0          | 1          | 0          | 0.00 | 0.48663 |
| IPI00374065 | PREDICTED: similar to melanoma inhibitory activity 3 isoform 1  |              |                                            |                 |                         | 1        | 1        | 2        | 0          | 2          | 1          | 0.00 | 0.48663 |
| IPI00377222 | WD repeat domain 20 isoform 4                                   | WDR20        | WD repeat domain 20                        | unknown         | other                   | 0        | 3        | 2        | 3          | 2          | 0          | 0.00 | 0.48663 |
| IPI00377261 | Isoform 1 of Far upstream element-binding protein 3             | FUBP3        | far upstream element (FUSE) binding prot   | Nucleus         | transcription regulator | 0        | 0        | 0        | 1          | 0          | 1          | 0.00 | 0.48663 |
| IPI00383085 | FLJ00144 protein (Fragment)                                     |              |                                            |                 |                         | 1        | 0        | 0        | 0          | 0          | 0          | 0.00 | 0.48663 |
| IPI00384028 | poly(A) polymerase alpha                                        | PAPOLA       | poly(A) polymerase alpha                   | Nucleus         | enzyme                  | 3        | 3        | 1        | 0          | 3          | 3          | 0.00 | 0.48663 |
| IPI00384176 | Isoform 1 of Protein polybromo-1                                | PBRM1        | polybromo 1                                | Nucleus         | other                   | 2        | 4        | 4        | 3          | 3          | 4          | 0.00 | 0.48663 |
| IPI00384556 | Ribosomal RNA upstream binding transcription factor (Fragment)  | UBTF         | upstream binding transcription factor, RN  | Nucleus         | transcription regulator | 1        | 2        | 0        | 2          | 0          | 0          | 0.00 | 0.48663 |
| IPI00384861 | Isoform 1 of ARF GTPase-activating protein GIT1                 | GIT1 (includ | G protein-coupled receptor kinase intera   | Nucleus         | other                   | 4        | 0        | 2        | 3          | 2          | 2          | 0.00 | 0.48663 |
| IPI00384867 | Isoform 2 of Adenosine 3'-phospho 5'-phosphosulfate transporte  | SLC35B2      | solute carrier family 35, member B2        | Cytoplasm       | transporter             | 2        | 0        | 3        | 0          | 3          | 2          | 0.00 | 0.48663 |
| IPI00384909 | CDNA FLJ12811 fis, clone NT2RP2002475                           | KIDINS220    | kinase D-interacting substrate, 220kDa     | Nucleus         | transcription regulator | 0        | 0        | 0        | 0          | 0          | 1          | 0.00 | 0.48663 |
| IPI00386189 | Isoform 1 of NMDA receptor-regulated protein 1                  | NAA15        | N(alpha)-acetyltransferase 15, NatA auxili | Nucleus         | transcription regulator | 0        | 0        | 0        | 1          | 1          | 0          | 0.00 | 0.48663 |
| IPI00386718 | Isoform Short of Probable global transcription activator SNF2L2 | SMARCA2      | SWI/SNF related, matrix associated, actin  | Nucleus         | transcription regulator | 3        | 2        | 3        | 2          | 3          | 3          | 0.00 | 0.48663 |
| IPI00396010 | RAB GTPase activating protein 1-like isoform A                  | RABGAP1L     | RAB GTPase activating protein 1-like       | Cytoplasm       | other                   | 2        | 0        | 0        | 2          | 0          | 0          | 0.00 | 0.48663 |
| IPI00396063 | Pseudogene candidate                                            | DENND4A      | DENN/MADD domain containing 4A             | Nucleus         | other                   | 0        | 0        | 0        | 0          | 0          | 1          | 0.00 | 0.48663 |
| IPI00396421 | Protein KIAA0776                                                | UFL1         | UFM1-specific ligase 1                     | Cytoplasm       | other                   | 1        | 0        | 0        | 1          | 0          | 0          | 0.00 | 0.48663 |
| IPI00396627 | Isoform 1 of Zinc phosphodiesterase ELAC protein 2              | ELAC2        | elaC homolog 2 (E. coli)                   | Nucleus         | enzyme                  | 2        | 0        | 0        | 1          | 2          | 0          | 0.00 | 0.48663 |
| IPI00397380 | Isoform 2 of Epsin-2                                            | EPN2         | epsin 2                                    | Cytoplasm       | other                   | 4        | 6        | 4        | 6          | 4          | 4          | 0.00 | 0.48663 |
| IPI00397526 | Myosin-10                                                       | MYH10        | myosin, heavy chain 10, non-muscle         | Cytoplasm       | other                   | 2        | 2        | 2        | 2          | 2          | 2          | 0.00 | 0.48663 |
| IPI00398002 | plectin 1 isoform 1                                             | PLEC         | plectin                                    | Cytoplasm       | other                   | 0        | 0        | 1        | 0          | 0          | 0          | 0.00 | 0.48663 |
| IPI00398625 | Hornerin                                                        | HRNR         | hornerin                                   | Cytoplasm       | other                   | 1        | 0        | 0        | 0          | 0          | 0          | 0.00 | 0.48663 |
| IPI00398786 | Isoform 2 of Protein C14orf133                                  | C14orf133    | chromosome 14 open reading frame 133       | Plasma Membrane | other                   | 0        | 0        | 1        | 0          | 0          | 0          | 0.00 | 0.48663 |
| IPI00398922 | Similar to Protein phosphatase 1 regulatory subunit 14B         | PPP1R14B     | protein phosphatase 1, regulatory (inhibit | Cytoplasm       | phosphatase             | 1        | 1        | 1        | 1          | 0          | 0          | 0.00 | 0.48663 |
| IPI00411636 | Isoform 1 of Beta-catenin-like protein 1                        | CTNBL1       | catenin, beta like 1                       | Nucleus         | other                   | 1        | 0        | 0        | 1          | 1          | 1          | 0.00 | 0.48663 |

**Supplemental Table 1. A list of all phosphorylated proteins identified in SNU216 and SNU216-LR.**

| Accession   | Identified Proteins                                              | Symbol    | Entrez Gene Name                              | Location        | Type(s)                 | SNU216-1 | SNU216-2 | SNU216-3 | SNU216-LR1 | SNU216-LR2 | SNU216-LR3 | STN  | p-value |
|-------------|------------------------------------------------------------------|-----------|-----------------------------------------------|-----------------|-------------------------|----------|----------|----------|------------|------------|------------|------|---------|
| IPI00411765 | SFN protein                                                      | SFN       | stratifin                                     | Cytoplasm       | other                   | 0        | 0        | 0        | 0          | 1          | 0          | 0.00 | 0.48663 |
| IPI00412415 | Isoform 1 of Bromodomain adjacent to zinc finger domain prote    | BAZ1A     | bromodomain adjacent to zinc finger dor       | Nucleus         | other                   | 16       | 14       | 12       | 12         | 17         | 13         | 0.00 | 0.48663 |
| IPI00413895 | Golgi autoantigen, golgin subfamily A member 2                   | GOLGA2    | golgin A2                                     | Cytoplasm       | other                   | 0        | 0        | 1        | 0          | 0          | 0          | 0.00 | 0.48663 |
| IPI00414554 | Actin related protein 2/3 complex, subunit 5-like                | ARPC5L    | actin related protein 2/3 complex, subuni     | unknown         | other                   | 0        | 0        | 0        | 0          | 1          | 1          | 0.00 | 0.48663 |
| IPI00414779 | DNA excision repair protein ERCC-6                               | ERCC6     | excision repair cross-complementing ro        | Nucleus         | transcription regulator | 0        | 0        | 1        | 0          | 0          | 1          | 0.00 | 0.48663 |
| IPI00414836 | Osteoclast-stimulating factor 1                                  | OSTF1     | osteoclast stimulating factor 1               | Nucleus         | transcription regulator | 1        | 0        | 1        | 0          | 0          | 0          | 0.00 | 0.48663 |
| IPI00415054 | Protein KIAA0329/KIAA0297                                        | TECP2     | tectonin beta-propeller repeat containi       | unknown         | other                   | 1        | 0        | 1        | 0          | 0          | 0          | 0.00 | 0.48663 |
| IPI00418234 | Methyl-CpG-binding protein 2                                     | MECP2     | methyl CpG binding protein 2 (Rett syndr      | Nucleus         | transcription regulator | 3        | 5        | 4        | 3          | 5          | 4          | 0.00 | 0.48663 |
| IPI00418340 | hypothetical protein LOC6936                                     | GCFC2     | GC-rich sequence DNA-binding factor 2         | Nucleus         | transcription regulator | 2        | 0        | 0        | 2          | 0          | 0          | 0.00 | 0.48663 |
| IPI00419273 | Isoform 1 of Cullin-4A                                           | CUL4A     | cullin 4A                                     | Nucleus         | other                   | 0        | 0        | 0        | 0          | 0          | 1          | 0.00 | 0.48663 |
| IPI00419531 | Cleavage and polyadenylation specificity factor, 100 kDa subunit | CPSF2     | cleavage and polyadenylation specific fac     | Nucleus         | other                   | 0        | 1        | 0        | 0          | 0          | 0          | 0.00 | 0.48663 |
| IPI00419880 | 40S ribosomal protein S3a                                        | RPS3A     | ribosomal protein S3A                         | Cytoplasm       | other                   | 2        | 1        | 1        | 1          | 1          | 2          | 0.00 | 0.48663 |
| IPI00440727 | Isoform 1 of Bromodomain-containing protein 4                    | BRD4      | bromodomain containing 4                      | Nucleus         | kinase                  | 3        | 1        | 2        | 2          | 0          | 3          | 0.00 | 0.48663 |
| IPI00442073 | Cysteine and glycine-rich protein 1                              | CSRP1     | cysteine and glycine-rich protein 1           | Nucleus         | other                   | 1        | 1        | 0        | 0          | 0          | 0          | 0.00 | 0.48663 |
| IPI00442167 | CDNA FLJ16400 fis, clone TUTER2000057, moderately similar to t   | AEBP2     | AE binding protein 2                          | Nucleus         | transcription regulator | 0        | 0        | 2        | 2          | 0          | 0          | 0.00 | 0.48663 |
| IPI00446377 | CDNA FLJ41744 fis, clone HSYRA2005496, highly similar to ENDC    |           |                                               |                 |                         | 0        | 0        | 0        | 1          | 0          | 0          | 0.00 | 0.48663 |
| IPI00449049 | Poly [ADP-ribose] polymerase 1                                   | PARP1     | poly (ADP-ribose) polymerase 1                | Nucleus         | enzyme                  | 0        | 0        | 0        | 0          | 0          | 1          | 0.00 | 0.48663 |
| IPI00449924 | Isoform 2 of Retinoic acid-induced protein 1                     | RAI1      | retinoic acid induced 1                       | Cytoplasm       | other                   | 4        | 7        | 6        | 7          | 6          | 4          | 0.00 | 0.48663 |
| IPI00454910 | Serine/threonine-protein kinase MRCK gamma                       | CDC42BPG  | CDC42 binding protein kinase gamma (D         | Cytoplasm       | kinase                  | 0        | 0        | 2        | 0          | 2          | 0          | 0.00 | 0.48663 |
| IPI00456969 | Dynein heavy chain, cytosolic                                    | DYNC1H1   | dynein, cytoplasmic 1, heavy chain 1          | Cytoplasm       | peptidase               | 0        | 0        | 0        | 1          | 1          | 1          | 0.00 | 0.48663 |
| IPI00465275 | Isoform 1 of Ran-binding protein 9                               | RANBP9    | RAN binding protein 9                         | Nucleus         | other                   | 0        | 0        | 0        | 0          | 0          | 1          | 0.00 | 0.48663 |
| IPI00465345 | Huntingtin interacting protein C, isoform 1                      | PRPF40B   | PRP40 pre-mRNA processing factor 40 hc        | Nucleus         | other                   | 0        | 3        | 3        | 0          | 3          | 3          | 0.00 | 0.48663 |
| IPI00470582 | Isoform 1 of Protein C10orf118                                   | C10orf118 | chromosome 10 open reading frame 118 unknown  |                 | other                   | 1        | 0        | 0        | 0          | 0          | 1          | 0.00 | 0.48663 |
| IPI00470594 | Putative MAPK activating protein                                 | C1orf144  | chromosome 1 open reading frame 144 unknown   |                 | other                   | 2        | 0        | 0        | 0          | 2          | 0          | 0.00 | 0.48663 |
| IPI00472102 | Heat shock protein 60                                            | HSPD1     | heat shock 60kDa protein 1 (chaperonin)       | Cytoplasm       | enzyme                  | 1        | 1        | 1        | 1          | 1          | 1          | 0.00 | 0.48663 |
| IPI00472160 | Rho/Rac guanine nucleotide exchange factor 2                     | ARHGEF2   | Rho/Rac guanine nucleotide exchange fa        | Cytoplasm       | other                   | 0        | 0        | 2        | 0          | 0          | 2          | 0.00 | 0.48663 |
| IPI00472779 | Ankyrin-3                                                        | ANK3      | ankyrin 3, node of Ranvier (ankyrin G)        | Plasma Membrane | other                   | 3        | 0        | 0        | 3          | 0          | 0          | 0.00 | 0.48663 |
| IPI00472794 | FCH domain only 2                                                | FCHO2     | FCH domain only 2                             | unknown         | other                   | 2        | 2        | 1        | 0          | 2          | 2          | 0.00 | 0.48663 |
| IPI00477526 | Conserved hypothetical protein                                   |           |                                               |                 |                         | 0        | 0        | 3        | 3          | 0          | 0          | 0.00 | 0.48663 |
| IPI00477701 | golgi SNAP receptor complex member 1 isoform 2                   | GOSR1     | golgi SNAP receptor complex member 1          | Cytoplasm       | transporter             | 2        | 0        | 1        | 2          | 1          | 0          | 0.00 | 0.48663 |
| IPI00477959 | TAF3 RNA polymerase II, TATA box binding protein                 |           |                                               |                 |                         | 0        | 3        | 0        | 0          | 3          | 0          | 0.00 | 0.48663 |
| IPI00478410 | Isoform Liver of ATP synthase gamma chain, mitochondrial precu   | ATP5C1    | ATP synthase, H+ transporting, mitochondi     | Cytoplasm       | transporter             | 0        | 0        | 0        | 0          | 1          | 0          | 0.00 | 0.48663 |
| IPI00479186 | pyruvate kinase 3 isoform 1                                      | PKM2      | pyruvate kinase, muscle                       | Cytoplasm       | kinase                  | 1        | 1        | 0        | 1          | 0          | 0          | 0.00 | 0.48663 |
| IPI00479262 | Isoform B of Eukaryotic translation initiation factor 4 gamma 1  | EIF4G1    | eukaryotic translation initiation factor 4 g  | Cytoplasm       | translation regulator   | 5        | 5        | 6        | 6          | 4          | 6          | 0.00 | 0.48663 |
| IPI00479359 | villin 2                                                         | EZR       | ezzrin                                        | Plasma Membrane | other                   | 0        | 0        | 0        | 0          | 1          | 0          | 0.00 | 0.48663 |
| IPI00479760 | AP2 associated kinase 1                                          | AAK1      | AP2 associated kinase 1                       | Cytoplasm       | kinase                  | 0        | 0        | 0        | 1          | 0          | 0          | 0.00 | 0.48663 |
| IPI00479786 | KH-type splicing regulatory protein                              | KHSRP     | KH-type splicing regulatory protein           | Nucleus         | enzyme                  | 1        | 1        | 1        | 1          | 1          | 1          | 0.00 | 0.48663 |
| IPI00514669 | SH3 domain binding glutamic acid-rich protein like 3             | SH3BGRL3  | SH3 domain binding glutamic acid-rich p       | Nucleus         | other                   | 0        | 0        | 0        | 1          | 0          | 0          | 0.00 | 0.48663 |
| IPI00514832 | Tripartite motif protein 56                                      | TRIM56    | tripartite motif containing 56                | Cytoplasm       | enzyme                  | 3        | 2        | 2        | 4          | 0          | 2          | 0.00 | 0.48663 |
| IPI00550212 | cytoplasmic FMR1 interacting protein 1 isoform b                 | CYFIP1    | cytoplasmic FMR1 interacting protein 1        | Cytoplasm       | other                   | 0        | 0        | 0        | 1          | 0          | 0          | 0.00 | 0.48663 |
| IPI00550363 | Transgelin-2                                                     | TAGLN2    | transgelin 2                                  | Cytoplasm       | other                   | 0        | 1        | 1        | 0          | 0          | 0          | 0.00 | 0.48663 |
| IPI00550523 | hypothetical protein LOC25923                                    | ATL3      | atlastin GTPase 3                             | Cytoplasm       | other                   | 0        | 0        | 0        | 1          | 1          | 0          | 0.00 | 0.48663 |
| IPI00550917 | Twinfilin-2                                                      | TWF2      | twinfilin, actin-binding protein, homolog     | Cytoplasm       | kinase                  | 1        | 0        | 0        | 0          | 0          | 0          | 0.00 | 0.48663 |
| IPI00553164 | 40S ribosomal protein SA                                         |           |                                               |                 |                         | 0        | 0        | 1        | 0          | 0          | 0          | 0.00 | 0.48663 |
| IPI00554469 | Isoform 2 of Mitochondrial inner membrane protein                | IMMT      | inner membrane protein, mitochondrial         | Cytoplasm       | other                   | 1        | 0        | 0        | 0          | 0          | 0          | 0.00 | 0.48663 |
| IPI00554590 | Isoform 1 of Rab3 GTPase-activating protein non-catalytic subun  | RAB3GAP2  | RAB3 GTPase activating protein subunit 2      | Cytoplasm       | enzyme                  | 0        | 0        | 0        | 1          | 0          | 0          | 0.00 | 0.48663 |
| IPI00555902 | OCIA domain containing 2 isoform 1                               | OCIAD2    | OCIA domain containing 2                      | Cytoplasm       | other                   | 0        | 0        | 0        | 0          | 0          | 1          | 0.00 | 0.48663 |
| IPI00643920 | Transketolase                                                    | TKT       | transketolase                                 | Cytoplasm       | enzyme                  | 1        | 0        | 0        | 0          | 0          | 0          | 0.00 | 0.48663 |
| IPI00644209 | 13 kDa protein                                                   |           |                                               |                 |                         | 0        | 0        | 0        | 0          | 0          | 1          | 0.00 | 0.48663 |
| IPI00644521 | 36 kDa protein                                                   |           |                                               |                 |                         | 1        | 0        | 0        | 0          | 0          | 0          | 0.00 | 0.48663 |
| IPI00644591 | hypothetical protein LOC64423 isoform 2                          | INF2      | inverted formin, FH2 and WH2 domain cc        | Cytoplasm       | other                   | 14       | 17       | 12       | 18         | 10         | 15         | 0.00 | 0.48663 |
| IPI00645078 | Ubiquitin-activating enzyme E1                                   | UBA1      | ubiquitin-like modifier activating enzyme     | Cytoplasm       | enzyme                  | 0        | 0        | 1        | 0          | 0          | 1          | 0.00 | 0.48663 |
| IPI00645403 | hypothetical protein LOC56243                                    | KIAA1217  |                                               | Cytoplasm       | other                   | 0        | 1        | 0        | 0          | 0          | 1          | 0.00 | 0.48663 |
| IPI00647650 | Eukaryotic translation initiation factor 3 subunit 3             | EIF3H     | eukaryotic translation initiation factor 3, s | Cytoplasm       | translation regulator   | 0        | 0        | 0        | 1          | 0          | 0          | 0.00 | 0.48663 |

**Supplemental Table 1. A list of all phosphorylated proteins identified in SNU216 and SNU216-LR.**

| Accession   | Identified Proteins                                            | Symbol    | Entrez Gene Name                          | Location        | Type(s)                 | SNU216-1 | SNU216-2 | SNU216-3 | SNU216-LR1 | SNU216-LR2 | SNU216-LR3 | STN   | <i>p</i> -value |
|-------------|----------------------------------------------------------------|-----------|-------------------------------------------|-----------------|-------------------------|----------|----------|----------|------------|------------|------------|-------|-----------------|
| IPI00657692 | Goodpasture antigen-binding protein                            | COL4A3BP  | collagen, type IV, alpha 3 (Goodpasture a | Cytoplasm       | kinase                  | 0        | 0        | 1        | 1          | 0          | 0          | 0.00  | 0.48663         |
| IPI00658000 | insulin-like growth factor 2 mRNA binding protein 3            | IGF2BP3   | insulin-like growth factor 2 mRNA bindin  | Cytoplasm       | translation regulator   | 1        | 1        | 0        | 0          | 0          | 0          | 0.00  | 0.48663         |
| IPI00735331 | PREDICTED: AF-1 specific protein phosphatase isoform 5         |           |                                           |                 |                         | 0        | 0        | 0        | 1          | 1          | 0          | 0.00  | 0.48663         |
| IPI00738223 | PREDICTED: similar to rho guanine nucleotide exchange factor 5 | ARRHGEF35 | Rho guanine nucleotide exchange factor    | unknown         | other                   | 0        | 0        | 0        | 0          | 1          | 1          | 0.00  | 0.48663         |
| IPI00738806 | PREDICTED: myosin VIIIB                                        | MYO7B     | myosin VIIIB                              | unknown         | peptidase               | 0        | 0        | 0        | 0          | 0          | 1          | 0.00  | 0.48663         |
| IPI00742905 | 146 kDa protein                                                |           |                                           |                 |                         | 1        | 1        | 3        | 1          | 2          | 2          | 0.00  | 0.48663         |
| IPI00743314 | General vesicular transport factor p115                        | USO1      | USO1 vesicle docking protein homolog (γ   | Cytoplasm       | transporter             | 9        | 6        | 9        | 10         | 6          | 8          | 0.00  | 0.48663         |
| IPI00744288 | Isoform 5 of C-jun-amino-terminal kinase-interacting protein 4 | SPAG9     | sperm associated antigen 9                | Plasma Membrane | other                   | 18       | 17       | 19       | 15         | 22         | 17         | 0.00  | 0.48663         |
| IPI00744692 | Transaldolase                                                  | TALDO1    | transaldolase 1                           | Cytoplasm       | enzyme                  | 1        | 1        | 0        | 0          | 0          | 0          | 0.00  | 0.48663         |
| IPI00746221 | Conserved hypothetical protein                                 | FAM195B   | family with sequence similarity 195, mem  | unknown         | other                   | 0        | 0        | 0        | 0          | 1          | 1          | 0.00  | 0.48663         |
| IPI00747113 | Adenovirus E1B19k-binding protein B5                           | BNIP3L    | BCL2/adenovirus E1B 19kDa interacting p   | Cytoplasm       | other                   | 3        | 3        | 0        | 1          | 3          | 3          | 0.00  | 0.48663         |
| IPI00006079 | Isoform 1 of Bcl-2-associated transcription factor 1           | BCLAF1    | BCL2-associated transcription factor 1    | Nucleus         | transcription regulator | 88       | 87       | 81       | 82         | 90         | 83         | -0.07 | 0.48696         |

Protein IPI accession name, symbol, Entez gene name, and predicted sub-cellular localization are shown based on its description in the uniprot database. Additional column describes signal-to-noise ratio (STN) and *p*-value.
