# Supplementary material for: Phosphoproteomic analysis identifies activated MET-axis PI3K/AKT and MAPK/ERK in lapatinib-resistant cancer cell line
Source: PubMed Central journal article supplement — Exp Mol Med. 2013 Nov 22;45(11):e64–. doi: 10.1038/emm.2013.115 (PMC3849569; doi:10.1038/emm.2013.115), 2013-11-22
Supplement: emm2013115x8.pdf [file emm2013115x8.pdf]

Supplemental Table 2. List of all phosphorylated peptides identified in SNU216 and SNU216-LR.

| MS/MS sample name | Protein name                                         | Protein accession numbers  | Protein molecular weight (Da) | Protein identification probability | Number of unique peptides | Number of unique spectra | Number of total spectra | Percentage of total spectra | Percentage sequence coverage | Peptide sequence                  | Previous amino acid | Next amino acid | Best Peptide identification probability | Best SEQUEST XCorr score | Best SEQUEST Dcn score | Number of identified +1H spectra | Number of identified +2H spectra | Number of identified +3H spectra | Number of identified +4H spectra | Number of enzymatic termini | Calculate d +1H Peptide Mass (AMU) | Peptide start index | Peptide stop index | Assigned | Other Proteins |
|-------------------|------------------------------------------------------|----------------------------|-------------------------------|------------------------------------|---------------------------|--------------------------|-------------------------|-----------------------------|------------------------------|-----------------------------------|---------------------|-----------------|-----------------------------------------|--------------------------|------------------------|----------------------------------|----------------------------------|----------------------------------|----------------------------------|-----------------------------|------------------------------------|---------------------|--------------------|----------|----------------|
| SNU216_PCL_03     | 185 kDa protein                                      | IP000328905,IP000514068,IP | 179,487.00                    | 100.00%                            | 3                         | 4                        | 4                       | 0.02%                       | 2.02%                        | SLTAHSLLPLAEK                     | R                   | Q               | 95.00%                                  | 2.89                     | 0.331                  | 0                                | 1                                | 0                                | 0                                | 2                           | 1,459.76                           | 1381                | 1393               | TRUE     |                |
| SNU216_PCL_03     | 185 kDa protein                                      | IP000328905,IP000514068,IP | 179,487.00                    | 100.00%                            | 3                         | 4                        | 4                       | 0.02%                       | 2.02%                        | VLAVSLINEALDKGSPKEK               | R                   | T               | 95.00%                                  | 3.46                     | 0.285                  | 0                                | 0                                | 1                                | 0                                | 2                           | 1,963.02                           | 482                 | 499                | TRUE     |                |
| SNU216_PCL_03     | KARP-1-binding protein                               | IP000186194                | 175,439.10                    | 99.80%                             | 1                         | 1                        | 1                       | 0.01%                       | 1.45%                        | QGSFTKEKSPNIPRIELPHINK            | R                   | Q               | 95.00%                                  | 3.13                     | 0.268                  | 0                                | 0                                | 1                                | 0                                | 2                           | 2,652.38                           | 837                 | 859                | TRUE     |                |
| SNU216_PCL_03     | HIV TAT specific factor 1                            | IP000013788                | 85,854.60                     | 100.00%                            | 5                         | 7                        | 7                       | 0.04%                       | 11.70%                       | EFEDSDSEKEEEDDYTEK                | R                   | V               | 95.00%                                  | 4.54                     | 0.458                  | 0                                | 1                                | 1                                | 0                                | 2                           | 2,345.83                           | 619                 | 636                | TRUE     |                |
| SNU216_PCL_03     | HIV TAT specific factor 1                            | IP000013788                | 85,854.60                     | 100.00%                            | 5                         | 7                        | 7                       | 0.04%                       | 11.70%                       | LFEDDSNKEKLFDEEDSDSEK             | K                   | L               | 95.00%                                  | 3.03                     | 0.224                  | 0                                | 0                                | 1                                | 0                                | 2                           | 2,600.01                           | 696                 | 716                | TRUE     |                |
| SNU216_PCL_03     | HIV TAT specific factor 1                            | IP000013788                | 85,854.60                     | 100.00%                            | 5                         | 7                        | 7                       | 0.04%                       | 11.70%                       | LFEDSDSDKEDEDADGKEVEDADEK         | K                   | L               | 95.00%                                  | 6.56                     | 0.47                   | 0                                | 0                                | 0                                | 2                                | 2,837.11                    | 672                                | 695                 | TRUE               |          |                |
| SNU216_PCL_03     | HIV TAT specific factor 1                            | IP000013788                | 85,854.60                     | 100.00%                            | 5                         | 7                        | 7                       | 0.04%                       | 11.70%                       | VFDDSEDEKEDEEYADEK                | K                   | G               | 95.00%                                  | 3.62                     | 0.401                  | 0                                | 1                                | 1                                | 0                                | 2                           | 2,271.83                           | 637                 | 654                | TRUE     |                |
| SNU216_PCL_03     | HIV TAT specific factor 1                            | IP000013788                | 85,854.60                     | 100.00%                            | 5                         | 7                        | 7                       | 0.04%                       | 11.70%                       | VFDDSEDEKEDEEYADEKLEAAADK         | K                   | K               | 95.00%                                  | 5.76                     | 0.502                  | 0                                | 0                                | 1                                | 0                                | 2                           | 2,956.18                           | 637                 | 661                | TRUE     |                |
| SNU216_PCL_03     | Isoform 1 of Putative RNA-binding protein 15         | IP000102752,IP000220716,IP | 104,758.90                    | 100.00%                            | 4                         | 4                        | 4                       | 0.02%                       | 4.71%                        | DRTPPLLYR                         | R                   | D               | 95.00%                                  | 2.59                     | 0.217                  | 0                                | 0                                | 1                                | 0                                | 2                           | 1,210.60                           | 566                 | 574                | TRUE     |                |
| SNU216_PCL_03     | Isoform 1 of Putative RNA-binding protein 15         | IP000102752,IP000220716,IP | 104,758.90                    | 100.00%                            | 4                         | 4                        | 4                       | 0.02%                       | 4.71%                        | HLDRSPESDRPR                      | R                   | K               | 84.40%                                  | 1.98                     | 0.191                  | 0                                | 0                                | 1                                | 0                                | 2                           | 1,544.70                           | 652                 | 663                | TRUE     |                |
| SNU216_PCL_03     | Isoform 1 of Putative RNA-binding protein 15         | IP000102752,IP000220716,IP | 104,758.90                    | 100.00%                            | 4                         | 4                        | 4                       | 0.02%                       | 4.71%                        | SLSPGGAALGVR                      | R                   | D               | 87.90%                                  | 2.01                     | 0.183                  | 0                                | 1                                | 0                                | 0                                | 2                           | 1,228.57                           | 292                 | 303                | TRUE     |                |
| SNU216_PCL_03     | Isoform 1 of Putative RNA-binding protein 15         | IP000102752,IP000220716,IP | 104,758.90                    | 100.00%                            | 4                         | 4                        | 4                       | 0.02%                       | 4.71%                        | TTAPTETGKSLPKK                    | R                   | E               | 95.00%                                  | 2.75                     | 0.213                  | 0                                | 0                                | 1                                | 0                                | 2                           | 1,437.74                           | 733                 | 745                | TRUE     |                |
| SNU216_PCL_03     | Nascent polypeptide-associated complex alpha subunit | IP000023748                | 23,383.30                     | 100.00%                            | 1                         | 1                        | 1                       | 0.01%                       | 16.30%                       | VQGEAVSNQENTQTPTVQEESEEEVDET      | K                   | D               | 95.00%                                  | 6.18                     | 0.0731                 | 0                                | 0                                | 1                                | 0                                | 2                           | 3,940.73                           | 145                 | 179                | TRUE     |                |
| SNU216_PCL_03     | Conserved nuclear protein NHH1                       | IP000328929                | 106,379.80                    | 100.00%                            | 3                         | 3                        | 3                       | 0.02%                       | 4.51%                        | GPSQEEEDNHSDEEDRASEPK             | R                   | S               | 95.00%                                  | 3.31                     | 0.234                  | 0                                | 0                                | 1                                | 0                                | 2                           | 2,464.94                           | 57                  | 77                 | TRUE     |                |
| SNU216_PCL_03     | Conserved nuclear protein NHH1                       | IP000328929                | 106,379.80                    | 100.00%                            | 3                         | 3                        | 3                       | 0.02%                       | 4.51%                        | GPSQEEEDNHSDEEDRASEPKSQDQSEVI     | R                   | G               | 95.00%                                  | 2.77                     | 0.247                  | 0                                | 0                                | 1                                | 2                                | 4,112.52                    | 57                                 | 90                  | TRUE               |          |                |
| SNU216_PCL_03     | Conserved nuclear protein NHH1                       | IP000328929                | 106,379.80                    | 100.00%                            | 3                         | 3                        | 3                       | 0.02%                       | 4.51%                        | LGVSVSPSR                         | K                   | A               | 95.00%                                  | 2.17                     | 0.308                  | 0                                | 1                                | 0                                | 0                                | 2                           | 981.4765                           | 529                 | 537                | TRUE     |                |
| SNU216_PCL_03     | Heat shock protein HSP 90-beta                       | IP000414676                | 83,136.10                     | 100.00%                            | 6                         | 10                       | 11                      | 0.07%                       | 4.56%                        | EISDDAEAEKGEK                     | K                   | E               | 95.00%                                  | 3.38                     | 0.421                  | 0                                | 1                                | 1                                | 0                                | 2                           | 1,687.66                           | 223                 | 236                | TRUE     |                |
| SNU216_PCL_03     | Heat shock protein HSP 90-beta                       | IP000414676                | 83,136.10                     | 100.00%                            | 6                         | 10                       | 11                      | 0.07%                       | 4.56%                        | EKEISDDAEAEK                      | R                   | G               | 95.00%                                  | 3.52                     | 0.449                  | 0                                | 1                                | 0                                | 0                                | 2                           | 1,630.64                           | 221                 | 233                | TRUE     |                |
| SNU216_PCL_03     | Heat shock protein HSP 90-beta                       | IP000414676                | 83,136.10                     | 100.00%                            | 6                         | 10                       | 11                      | 0.07%                       | 4.56%                        | EKEISDDAEAEKGEK                   | R                   | E               | 95.00%                                  | 4.17                     | 0.391                  | 0                                | 1                                | 1                                | 0                                | 2                           | 1,944.80                           | 221                 | 236                | TRUE     |                |
| SNU216_PCL_03     | Heat shock protein HSP 90-beta                       | IP000414676                | 83,136.10                     | 100.00%                            | 6                         | 10                       | 11                      | 0.07%                       | 4.56%                        | IEDVGSDEEDDSGK                    | K                   | D               | 95.00%                                  | 2.84                     | 0.444                  | 0                                | 1                                | 0                                | 0                                | 2                           | 1,574.57                           | 249                 | 262                | TRUE     |                |
| SNU216_PCL_03     | Heat shock protein HSP 90-beta                       | IP000414676                | 83,136.10                     | 100.00%                            | 6                         | 10                       | 11                      | 0.07%                       | 4.56%                        | IEDVGSDEEDDSGDKDK                 | K                   | K               | 95.00%                                  | 3.58                     | 0.506                  | 0                                | 2                                | 1                                | 0                                | 2                           | 1,817.70                           | 249                 | 264                | TRUE     |                |
| SNU216_PCL_03     | Heat shock protein HSP 90-beta                       | IP000414676                | 83,136.10                     | 100.00%                            | 6                         | 10                       | 11                      | 0.07%                       | 4.56%                        | IEDVGSDEEDDSGDKDKK                | K                   | K               | 95.00%                                  | 3.68                     | 0.327                  | 0                                | 1                                | 1                                | 0                                | 2                           | 1,945.79                           | 249                 | 265                | TRUE     |                |
| SNU216_PCL_03     | remodeling and spacing factor 1                      | IP000290652,IP000514411    | 159,318.30                    | 100.00%                            | 7                         | 11                       | 13                      | 0.08%                       | 6.32%                        | GRSTDSEYADDEEEEEEGKPSR            | R                   | K               | 95.00%                                  | 4.32                     | 0.0456                 | 0                                | 0                                | 1                                | 0                                | 2                           | 2,897.99                           | 1234                | 1256               | TRUE     |                |
| SNU216_PCL_03     | remodeling and spacing factor 1                      | IP000290652,IP000514411    | 159,318.30                    | 100.00%                            | 7                         | 11                       | 13                      | 0.08%                       | 6.32%                        | IESDEEEDFENVGK                    | R                   | V               | 95.00%                                  | 3                        | 0.468                  | 0                                | 2                                | 1                                | 0                                | 2                           | 1,719.66                           | 1302                | 1315               | TRUE     |                |
| SNU216_PCL_03     | remodeling and spacing factor 1                      | IP000290652,IP000514411    | 159,318.30                    | 100.00%                            | 7                         | 11                       | 13                      | 0.08%                       | 6.32%                        | KDPSPPKVLFPENK                    | K                   | Q               | 95.00%                                  | 4.43                     | 0.462                  | 0                                | 1                                | 2                                | 0                                | 2                           | 1,657.82                           | 704                 | 717                | TRUE     |                |
| SNU216_PCL_03     | remodeling and spacing factor 1                      | IP000290652,IP000514411    | 159,318.30                    | 100.00%                            | 7                         | 11                       | 13                      | 0.08%                       | 6.32%                        | KPVRIESEDDEEDFENVGK               | K                   | V               | 95.00%                                  | 3.69                     | 0.302                  | 0                                | 0                                | 1                                | 0                                | 2                           | 2,263.98                           | 1298                | 1315               | TRUE     |                |
| SNU216_PCL_03     | remodeling and spacing factor 1                      | IP000290652,IP000514411    | 159,318.30                    | 100.00%                            | 7                         | 11                       | 13                      | 0.08%                       | 6.32%                        | STDEYSEADDEEEEEEGKPSR             | R                   | K               | 95.00%                                  | 4.6                      | 0.49                   | 0                                | 1                                | 1                                | 0                                | 2                           | 2,524.94                           | 1236                | 1256               | TRUE     |                |
| SNU216_PCL_03     | remodeling and spacing factor 1                      | IP000290652,IP000514411    | 159,318.30                    | 100.00%                            | 7                         | 11                       | 13                      | 0.08%                       | 6.32%                        | VTPTKFLFKDEK                      | K                   | Q               | 95.00%                                  | 2.62                     | 0.296                  | 0                                | 0                                | 1                                | 0                                | 2                           | 1,714.87                           | 665                 | 378                | TRUE     |                |
| SNU216_PCL_03     | remodeling and spacing factor 1                      | IP000290652,IP000514411    | 159,318.30                    | 100.00%                            | 7                         | 11                       | 13                      | 0.08%                       | 6.32%                        | VGSPLDYSLVDLPSTNGQSPGK            | K                   | A               | 95.00%                                  | 4.11                     | 0.447                  | 0                                | 0                                | 1                                | 0                                | 2                           | 2,311.09                           | 1316                | 1337               | TRUE     |                |
| SNU216_PCL_03     | Isoform 1 of Epidermal growth factor receptor kir    | IP000414315                | 80,621.10                     | 100.00%                            | 2                         | 2                        | 2                       | 0.01%                       | 8.25%                        | FHSGWEPPVDVLQEAPEWVEGLASAPIEEV    | K                   | Q               | 95.00%                                  | 5.66                     | 0.498                  | 0                                | 0                                | 1                                | 0                                | 2                           | 3,923.85                           | 419                 | 453                | TRUE     |                |
| SNU216_PCL_03     | Isoform 1 of Epidermal growth factor receptor kir    | IP000414315                | 80,621.10                     | 100.00%                            | 2                         | 2                        | 2                       | 0.01%                       | 8.25%                        | HSPSTPEPTPGDALPVSSPHTHR           | K                   | G               | 95.00%                                  | 4.34                     | 0.363                  | 0                                | 0                                | 0                                | 1                                | 2                           | 2,581.18                           | 462                 | 485                | TRUE     |                |
| SNU216_PCL_03     | Isoform GTBP-alt of DNA mismatch repair protein      | IP000106847                | 120,567.00                    | 100.00%                            | 3                         | 4                        | 4                       | 0.02%                       | 4.59%                        | SEEDNEIESEEEVQPK                  | K                   | T               | 95.00%                                  | 3.93                     | 0.449                  | 0                                | 0                                | 0                                | 2                                | 1,970.78                    | 219                                | 234                 | TRUE               |          |                |
| SNU216_PCL_03     | Isoform GTBP-alt of DNA mismatch repair protein      | IP000106847                | 120,567.00                    | 100.00%                            | 3                         | 4                        | 4                       | 0.02%                       | 4.59%                        | VHVQFFDDSDTR                      | R                   | G               | 95.00%                                  | 2.03                     | 0.241                  | 0                                | 0                                | 1                                | 0                                | 2                           | 1,527.66                           | 129                 | 140                | TRUE     |                |
| SNU216_PCL_03     | Isoform GTBP-alt of DNA mismatch repair protein      | IP000106847                | 120,567.00                    | 100.00%                            | 3                         | 4                        | 4                       | 0.02%                       | 4.59%                        | VSDSESDIGGSDVEFKPDTK              | R                   | E               | 95.00%                                  | 3.55                     | 0.344                  | 0                                | 1                                | 1                                | 0                                | 2                           | 2,305.01                           | 250                 | 270                | TRUE     |                |
| SNU216_PCL_03     | Serine arginine-rich pre-mRNA splicing factor SR-    | IP000303343                | 139,272.90                    | 100.00%                            | 13                        | 14                       | 16                      | 0.10%                       | 13.50%                       | APGDDFLSLHAESDGGEGALQVLDGEPAPA    | R                   | W               | 95.00%                                  | 4.97                     | 0.534                  | 0                                | 0                                | 1                                | 0                                | 2                           | 3,781.69                           | 440                 | 476                | TRUE     |                |
| SNU216_PCL_03     | Serine arginine-rich pre-mRNA splicing factor SR-    | IP000303343                | 139,272.90                    | 100.00%                            | 13                        | 14                       | 16                      | 0.10%                       | 13.50%                       | LAASSSSGTQAPAPAPASPWDSKK          | K                   | H               | 95.00%                                  | 5.12                     | 0.444                  | 0                                | 0                                | 1                                | 0                                | 2                           | 2,434.09                           | 531                 | 554                | TRUE     |                |
| SNU216_PCL_03     | Serine arginine-rich pre-mRNA splicing factor SR-    | IP000303343                | 139,272.90                    | 100.00%                            | 13                        | 14                       | 16                      | 0.10%                       | 13.50%                       | FLVYDSEGLSGEER                    | R                   | G               | 95.00%                                  | 2.27                     | 0.272                  | 0                                | 1                                | 0                                | 0                                | 2                           | 1,742.66                           | 729                 | 742                | TRUE     |                |
| SNU216_PCL_03     | Serine arginine-rich pre-mRNA splicing factor SR-    | IP000303343                | 139,272.90                    | 100.00%                            | 13                        | 14                       | 16                      | 0.10%                       | 13.50%                       | FDYDPHFHTDEAYSPPPAPEQK            | R                   | Y               | 95.00%                                  | 4.93                     | 0.325                  | 0                                | 0                                | 1                                | 0                                | 2                           | 2,741.18                           | 225                 | 247                | TRUE     |                |
| SNU216_PCL_03     | Serine arginine-rich pre-mRNA splicing factor SR-    | IP000303343                | 139,272.90                    | 100.00%                            | 13                        | 14                       | 16                      | 0.10%                       | 13.50%                       | GAETSWSGEER                       | K                   | A               | 95.00%                                  | 2.74                     | 0.395                  | 0                                | 0                                | 1                                | 0                                | 2                           | 1,417.53                           | 958                 | 969                | TRUE     |                |
| SNU216_PCL_03     | Serine arginine-rich pre-mRNA splicing factor SR-    | IP000303343                | 139,272.90                    | 100.00%                            | 13                        | 14                       | 16                      | 0.10%                       | 13.50%                       | GPSAPASSPKR                       | R                   | E               | 95.00%                                  | 2.44                     | 0.268                  | 0                                | 2                                | 0                                | 0                                | 2                           | 1,311.55                           | 717                 | 728                | TRUE     |                |
| SNU216_PCL_03     | Serine arginine-rich pre-mRNA splicing factor SR-    | IP000303343                | 139,272.90                    | 100.00%                            | 13                        | 14                       | 16                      | 0.10%                       | 13.50%                       | QRSFSPAPAPAPAAAAAGPPTR            | R                   | K               | 95.00%                                  | 3.5                      | 0.451                  | 0                                | 1                                | 2                                | 0                                | 2                           | 2,127.97                           | 496                 | 516                | TRUE     |                |
| SNU216_PCL_03     | Serine arginine-rich pre-mRNA splicing factor SR-    | IP000303343                | 139,272.90                    | 100.00%                            | 13                        | 14                       | 16                      | 0.10%                       | 13.50%                       | REVLYDSEGLSGEER                   | K                   | G               | 95.00%                                  | 2.02                     | 0.245                  | 0                                | 1                                | 0                                | 0                                | 2                           | 1,898.76                           | 728                 | 742                | TRUE     |                |
| SNU216_PCL_03     | Serine arginine-rich pre-mRNA splicing factor SR-    | IP000303343                | 139,272.90                    | 100.00%                            | 13                        | 14                       | 16                      | 0.10%                       | 13.50%                       | RRSASPPPATSSSSSSR                 | R                   | R               | 95.00%                                  | 3.47                     | 0.41                   | 0                                | 0                                | 1                                | 0                                | 2                           | 1,877.79                           | 610                 | 626                | TRUE     |                |
| SNU216_PCL_03     | Serine arginine-rich pre-mRNA splicing factor SR-    | IP000303343                | 139,272.90                    | 100.00%                            | 13                        | 14                       | 16                      | 0.10%                       | 13.50%                       | SASPPPATSSSSSSR                   | R                   | R               | 95.00%                                  | 2.13                     | 0.439                  | 0                                | 1                                | 0                                | 0                                | 2                           | 1,565.59                           | 612                 | 626                | TRUE     |                |
| SNU216_PCL_03     | Serine arginine-rich pre-mRNA splicing factor SR-    | IP000303343                | 139,272.90                    | 100.00%                            | 13                        | 14                       | 16                      | 0.10%                       | 13.50%                       | SPFLKPDER                         | R                   | A               | 95.00%                                  | 2.07                     | 0.358                  | 0                                | 1                                | 0                                | 0                                | 2                           | 1,168.54                           | 874                 | 882                | TRUE     |                |
| SNU216_PCL_03     | Serine arginine-rich pre-mRNA splicing factor SR-    | IP000303343                | 139,272.90                    | 100.00%                            | 13                        | 14                       | 16                      | 0.10%                       | 13.50%                       | SPSPAPAPAPAAAAAGPPTR              | R                   | K               | 95.00%                                  | 3.23                     | 0.363                  | 0                                | 1                                | 0                                | 0                                | 2                           | 1,843.81                           | 498                 | 516                | TRUE     |                |
| SNU216_PCL_03     | Serine arginine-rich pre-mRNA splicing factor SR-    | IP000303343                | 139,272.90                    | 100.00%                            | 13                        | 14                       | 16                      | 0.10%                       | 13.50%                       | VPSTPPPK                          | K                   | A               | 86.30%                                  | 1.59                     | 0.257                  | 0                                | 1                                | 0                                | 0                                | 2                           | 902.4385                           | 973                 | 980                | TRUE     |                |
| SNU216_PCL_03     | RNA-binding protein NOB1                             | IP00022373,IP000394698     | 46,675.20                     | 99.80%                             | 1                         | 1                        | 1                       | 0.01%                       | 4.37%                        | KDSDDDGGGWITPSNIK                 | R                   | Q               | 95.00%                                  | 4.52                     | 0.49                   | 0                                | 0                                | 1                                | 0                                | 2                           | 1,999.83                           | 198                 | 215                | TRUE     |                |
| SNU216_PCL_03     | Isoform Beta of Paxillin                             | IP000335634                | 64,533.10                     | 100.00%                            | 3                         | 3                        | 3                       | 0.02%                       | 12.40%                       | FIHQQPQSSSPVYGSSAK                | R                   | T               | 95.00%                                  | 4.14                     | 0.0719                 | 0                                | 1                                | 0                                | 0                                | 2                           | 2,027.92                           | 76                  | 93                 | TRUE     |                |
| SNU216_PCL_03     | Isoform Beta of Paxillin                             | IP000335634                | 64,533.10                     | 100.00%                            | 3                         | 3                        | 3                       | 0.02%                       | 12.40%                       | GLEDVRPSVESLLDELESSVPSVPVPAITVNQC | R                   | V               | 95.00%                                  | 5.87                     | 0.355                  | 0                                | 0                                | 0                                | 1                                | 2                           | 4,229.03                           | 209                 | 247                | TRUE     |                |
| SNU216_PCL_03     | Isoform Beta of Paxillin                             | IP000335634                | 64,533.10                     | 100.00%                            | 3                         | 3                        | 3                       | 0.02%                       | 12.40%                       | SSPGGQDEGGFMAQKG                  | R                   | T               | 95.00%                                  | 2.57                     | 0.323                  | 0                                | 0                                | 1                                | 0                                | 2                           | 1,632.64                           | 302                 | 317                | TRUE     |                |

Supplemental Table 2. A list of all phosphorylated peptides identified in SNU216 and SNU216-LR.

| MS/MS sample name | Protein name                                         | Protein accession numbers | Protein molecular weight (Da) | Protein identification probability | Number of unique peptides | Number of unique spectra | Number of total spectra | Percentage of total spectra | Percentage sequence coverage | Peptide sequence                 | Previous amino acid | Next amino acid | Best Peptide identification probability | Best SEQUEST XCorr score | Best SEQUEST Dcn score | Number of identified +1H spectra | Number of identified +2H spectra | Number of identified +3H spectra | Number of identified +4H spectra | Number of enzymatic termini | Calculate d +1H Peptide Mass (AMU) | Peptide start index | Peptide stop index | Assigned | Other Proteins |
|-------------------|------------------------------------------------------|---------------------------|-------------------------------|------------------------------------|---------------------------|--------------------------|-------------------------|-----------------------------|------------------------------|----------------------------------|---------------------|-----------------|-----------------------------------------|--------------------------|------------------------|----------------------------------|----------------------------------|----------------------------------|----------------------------------|-----------------------------|------------------------------------|---------------------|--------------------|----------|----------------|
| SNU216_PCL_03     | Isoform 1 of Tuberin                                 | IP00028493,IP000218883    | 200,751.90                    | 99.60%                             | 2                         | 2                        | 2                       | 0.01%                       | 2.27%                        | SQSGTLDGESAANWASGEDSR            | R                   | G               | 95.00%                                  | 5.09                     | 0.616                  | 0                                | 1                                | 0                                | 0                                | 2                           | 2,177.86                           | 1418                | 1438               | TRUE     |                |
| SNU216_PCL_03     | Isoform 1 of Tuberin                                 | IP00028493,IP000218883    | 200,751.90                    | 99.60%                             | 2                         | 2                        | 2                       | 0.01%                       | 2.27%                        | SSSSPELQTLQDLIDGPGDK             | K                   | A               | 92.60%                                  | 3.85                     | 0.0234                 | 0                                | 1                                | 0                                | 0                                | 2                           | 2,166.98                           | 1385                | 1404               | TRUE     |                |
| SNU216_PCL_03     | Nucleolar complex protein 2 homolog                  | IP000411886               | 84,907.10                     | 99.00%                             | 2                         | 3                        | 3                       | 0.02%                       | 2.27%                        | EAARSPDKPGGSPASR                 | R                   | R               | 95.00%                                  | 3.25                     | 0.333                  | 0                                | 1                                | 1                                | 0                                | 2                           | 1,749.79                           | 45                  | 61                 | TRUE     |                |
| SNU216_PCL_03     | Nucleolar complex protein 2 homolog                  | IP000411886               | 84,907.10                     | 99.00%                             | 2                         | 3                        | 3                       | 0.02%                       | 2.27%                        | SPDKPGGSPASR                     | R                   | R               | 79.60%                                  | 1.94                     | 0.262                  | 0                                | 1                                | 0                                | 0                                | 2                           | 1,322.57                           | 49                  | 61                 | TRUE     |                |
| SNU216_PCL_03     | Histone H1.5                                         | IP000217468               | 22,450.50                     | 99.80%                             | 2                         | 3                        | 3                       | 0.02%                       | 9.33%                        | SETAPAEATATPAPVEKSPAK            | -                   | K               | 95.00%                                  | 5.15                     | 0.56                   | 0                                | 1                                | 1                                | 0                                | 2                           | 2,061.97                           | 1                   | 20                 | TRUE     |                |
| SNU216_PCL_03     | Histone H1.5                                         | IP000217468               | 22,450.50                     | 99.80%                             | 2                         | 3                        | 3                       | 0.02%                       | 9.33%                        | SETAPAEATATPAPVEKSPAKK           | -                   | K               | 95.00%                                  | 3.43                     | 0.174                  | 0                                | 0                                | 1                                | 0                                | 2                           | 2,190.07                           | 1                   | 21                 | TRUE     |                |
| SNU216_PCL_03     | WD-repeat protein 3                                  | IP00009471                | 106,102.50                    | 100.00%                            | 3                         | 4                        | 4                       | 0.02%                       | 5.30%                        | ECEAKSEVMFFADATSHLEEK            | R                   | R               | 95.00%                                  | 2.85                     | 0.235                  | 0                                | 0                                | 1                                | 0                                | 2                           | 2,746.12                           | 908                 | 929                | TRUE     |                |
| SNU216_PCL_03     | WD-repeat protein 3                                  | IP00009471                | 106,102.50                    | 100.00%                            | 3                         | 4                        | 4                       | 0.02%                       | 5.30%                        | IGSSPGIQDTLEADGAFETDEAPEDR       | K                   | I               | 95.00%                                  | 5.63                     | 0.538                  | 0                                | 1                                | 1                                | 0                                | 2                           | 2,816.14                           | 239                 | 264                | TRUE     |                |
| SNU216_PCL_03     | WD-repeat protein 3                                  | IP00009471                | 106,102.50                    | 100.00%                            | 3                         | 4                        | 4                       | 0.02%                       | 5.30%                        | IGSSSPGIQDTLEADGAFETDEAPEDR      | K                   | I               | 95.00%                                  | 5.98                     | 0.455                  | 0                                | 0                                | 1                                | 0                                | 2                           | 3,057.32                           | 237                 | 264                | TRUE     |                |
| SNU216_PCL_03     | Isoform 2 of AP-3 complex subunit delta-1            | IP000289608,IP000719680   | 136,654.70                    | 100.00%                            | 2                         | 2                        | 2                       | 0.01%                       | 3.41%                        | NTETSKSEPKDVPVMVEK               | R                   | K               | 95.00%                                  | 3.43                     | 0.342                  | 0                                | 0                                | 1                                | 0                                | 2                           | 1,998.91                           | 823                 | 839                | TRUE     |                |
| SNU216_PCL_03     | Isoform 2 of AP-3 complex subunit delta-1            | IP000289608,IP000719680   | 136,654.70                    | 100.00%                            | 2                         | 2                        | 2                       | 0.01%                       | 3.41%                        | TEAQGEEDDAEGQDQDKSKPK            | K                   | P               | 95.00%                                  | 2.98                     | 0.185                  | 0                                | 0                                | 1                                | 0                                | 2                           | 2,384.97                           | 913                 | 933                | TRUE     |                |
| SNU216_PCL_03     | DENN domain containing protein                       | IP000100453,IP000746398   | 186,861.90                    | 100.00%                            | 4                         | 4                        | 6                       | 0.04%                       | 5.52%                        | HSQSPSPPEHSPTEPPAWGSSIVK         | K                   | V               | 95.00%                                  | 4.43                     | 0.39                   | 0                                | 0                                | 3                                | 0                                | 2                           | 2,532.16                           | 728                 | 750                | TRUE     |                |
| SNU216_PCL_03     | DENN domain containing protein                       | IP000100453,IP000746398   | 186,861.90                    | 100.00%                            | 4                         | 4                        | 6                       | 0.04%                       | 5.52%                        | NLADEESVMNLKSLPGSK               | R                   | S               | 95.00%                                  | 3.15                     | 0.332                  | 0                                | 0                                | 1                                | 0                                | 2                           | 2,189.02                           | 995                 | 1013               | TRUE     |                |
| SNU216_PCL_03     | DENN domain containing protein                       | IP000100453,IP000746398   | 186,861.90                    | 100.00%                            | 4                         | 4                        | 6                       | 0.04%                       | 5.52%                        | SLPLDLHGSPAQENPESEK              | R                   | S               | 95.00%                                  | 4.63                     | 0.386                  | 0                                | 0                                | 1                                | 0                                | 2                           | 2,258.01                           | 1040                | 1059               | TRUE     |                |
| SNU216_PCL_03     | DENN domain containing protein                       | IP000100453,IP000746398   | 186,861.90                    | 100.00%                            | 4                         | 4                        | 6                       | 0.04%                       | 5.52%                        | SSPVPEEMLEESQELLEFPVDDVPK        | R                   | T               | 95.00%                                  | 4.18                     | 0.579                  | 0                                | 0                                | 0                                | 0                                | 2                           | 2,746.28                           | 889                 | 912                | TRUE     |                |
| SNU216_PCL_03     | Isoform 1 of La-related protein 1                    | IP000185919               | 123,512.60                    | 100.00%                            | 9                         | 11                       | 16                      | 0.10%                       | 14.70%                       | AVTPVPVTKTEEYSNLK                | R                   | T               | 95.00%                                  | 3.36                     | 0.558                  | 0                                | 1                                | 1                                | 0                                | 2                           | 1,792.91                           | 524                 | 539                | TRUE     |                |
| SNU216_PCL_03     | Isoform 1 of La-related protein 1                    | IP000185919               | 123,512.60                    | 100.00%                            | 9                         | 11                       | 16                      | 0.10%                       | 14.70%                       | ESPRRLQLPGAEGPAISDGEEGGEPGAGG    | R                   | R               | 95.00%                                  | 6.24                     | 0.508                  | 0                                | 0                                | 2                                | 1                                | 2                           | 3,607.64                           | 74                  | 113                | TRUE     |                |
| SNU216_PCL_03     | Isoform 1 of La-related protein 1                    | IP000185919               | 123,512.60                    | 100.00%                            | 9                         | 11                       | 16                      | 0.10%                       | 14.70%                       | ITESAPGSPR                       | K                   | A               | 94.30%                                  | 1.81                     | 0.238                  | 0                                | 1                                | 0                                | 0                                | 2                           | 1,110.45                           | 514                 | 523                | TRUE     |                |
| SNU216_PCL_03     | Isoform 1 of La-related protein 1                    | IP000185919               | 123,512.60                    | 100.00%                            | 9                         | 11                       | 16                      | 0.10%                       | 14.70%                       | GLSASPLDLSSENWIEVK               | K                   | K               | 95.00%                                  | 3.38                     | 0.351                  | 0                                | 1                                | 0                                | 0                                | 2                           | 2,052.95                           | 544                 | 561                | TRUE     |                |
| SNU216_PCL_03     | Isoform 1 of La-related protein 1                    | IP000185919               | 123,512.60                    | 100.00%                            | 9                         | 11                       | 16                      | 0.10%                       | 14.70%                       | HSSNPPLSHVGVWVMSDR               | R                   | E               | 95.00%                                  | 3.95                     | 0.468                  | 0                                | 0                                | 1                                | 0                                | 2                           | 2,114.91                           | 822                 | 839                | TRUE     |                |
| SNU216_PCL_03     | Isoform 1 of La-related protein 1                    | IP000185919               | 123,512.60                    | 100.00%                            | 9                         | 11                       | 16                      | 0.10%                       | 14.70%                       | KNTFTAWSDEESDYEDDRDVNK           | R                   | I               | 91.20%                                  | 4.74                     | 0.0575                 | 0                                | 0                                | 2                                | 0                                | 2                           | 2,937.15                           | 620                 | 642                | TRUE     |                |
| SNU216_PCL_03     | Isoform 1 of La-related protein 1                    | IP000185919               | 123,512.60                    | 100.00%                            | 9                         | 11                       | 16                      | 0.10%                       | 14.70%                       | NALPPVLTIVNGQSPPEHSAPAK          | K                   | V               | 95.00%                                  | 2.97                     | 0.313                  | 0                                | 0                                | 0                                | 2                                | 2,405.19                    | 130                                | 152                 | TRUE               |          |                |
| SNU216_PCL_03     | Isoform 1 of La-related protein 1                    | IP000185919               | 123,512.60                    | 100.00%                            | 9                         | 11                       | 16                      | 0.10%                       | 14.70%                       | NFTTAWSDSEEDYEDDRDVNK            | K                   | I               | 95.00%                                  | 5.04                     | 0.0954                 | 0                                | 0                                | 1                                | 0                                | 2                           | 2,729.09                           | 621                 | 642                | TRUE     |                |
| SNU216_PCL_03     | Isoform 1 of La-related protein 1                    | IP000185919               | 123,512.60                    | 100.00%                            | 9                         | 11                       | 16                      | 0.10%                       | 14.70%                       | SLPTTVPESPNV                     | R                   | N               | 95.00%                                  | 2.85                     | 0.355                  | 0                                | 3                                | 0                                | 0                                | 2                           | 1,620.67                           | 766                 | 778                | TRUE     |                |
| SNU216_PCL_03     | Coiled-coil domain-containing protein 6              | IP00000634                | 65,918.80                     | 99.80%                             | 1                         | 1                        | 1                       | 0.01%                       | 2.05%                        | LQDPVSAPPSPR                     | K                   | D               | 95.00%                                  | 2.76                     | 0.277                  | 0                                | 1                                | 0                                | 0                                | 2                           | 1,423.60                           | 235                 | 246                | TRUE     |                |
| SNU216_PCL_03     | Isoform 1 of Cell division cycle 2-like protein kina | IP000456970               | 164,928.60                    | 100.00%                            | 3                         | 3                        | 3                       | 0.02%                       | 3.64%                        | ASNTSTPTKGNITETASASQTNHVK        | K                   | D               | 90.90%                                  | 5.57                     | 0.0311                 | 0                                | 0                                | 1                                | 0                                | 2                           | 2,599.16                           | 489                 | 513                | TRUE     |                |
| SNU216_PCL_03     | Isoform 1 of Cell division cycle 2-like protein kina | IP000456970               | 164,928.60                    | 100.00%                            | 3                         | 3                        | 3                       | 0.02%                       | 3.64%                        | GDDVSPSPYSYSSSWR                 | R                   | R               | 95.00%                                  | 3.19                     | 0.318                  | 0                                | 1                                | 0                                | 0                                | 2                           | 1,648.66                           | 379                 | 393                | TRUE     |                |
| SNU216_PCL_03     | Isoform 1 of Cell division cycle 2-like protein kina | IP000456970               | 164,928.60                    | 100.00%                            | 3                         | 3                        | 3                       | 0.02%                       | 3.64%                        | KSPSPAGGGSSPSYR                  | R                   | R               | 95.00%                                  | 2.29                     | 0.477                  | 0                                | 0                                | 0                                | 2                                | 1,674.60                    | 339                                | 353                 | TRUE               |          |                |
| SNU216_PCL_03     | hypothetical protein LOC65095 isoform 1              | IP000186139,IP000255778   | 83,253.20                     | 99.80%                             | 2                         | 2                        | 2                       | 0.01%                       | 5.22%                        | AFVDESEDEEGAGGEGSSLLQK           | R                   | R               | 95.00%                                  | 4.52                     | 0.521                  | 0                                | 1                                | 0                                | 0                                | 2                           | 2,319.95                           | 172                 | 193                | TRUE     |                |
| SNU216_PCL_03     | hypothetical protein LOC65095 isoform 1              | IP000186139,IP000255778   | 83,253.20                     | 99.80%                             | 2                         | 2                        | 2                       | 0.01%                       | 5.22%                        | YVDEENSDDGTSTNHR                 | K                   | L               | 95.00%                                  | 3.14                     | 0.466                  | 0                                | 0                                | 0                                | 2                                | 1,831.68                    | 136                                | 150                 | TRUE               |          |                |
| SNU216_PCL_03     | SH3 and multiple ankyrin repeat domains 2 isofo      | IP000220490               | 134,933.80                    | 99.80%                             | 2                         | 3                        | 3                       | 0.02%                       | 3.19%                        | NSPAFLSTDLGDEEDVGLGPPAPR         | R                   | T               | 95.00%                                  | 4.17                     | 0.51                   | 0                                | 1                                | 1                                | 0                                | 2                           | 2,405.10                           | 503                 | 525                | TRUE     |                |
| SNU216_PCL_03     | SH3 and multiple ankyrin repeat domains 2 isofo      | IP000220490               | 134,933.80                    | 99.80%                             | 2                         | 3                        | 3                       | 0.02%                       | 3.19%                        | TIIVAGSGMEEAIVFLPR               | R                   | I               | 95.00%                                  | 2.55                     | 0.52                   | 0                                | 0                                | 0                                | 2                                | 1,911.97                    | 779                                | 795                 | TRUE               |          |                |
| SNU216_PCL_03     | DUNB11 protein                                       | IP000328798               | 157,129.30                    | 100.00%                            | 4                         | 4                        | 4                       | 0.02%                       | 5.34%                        | ANQSPSNSLSLK                     | K                   | N               | 83.50%                                  | 2.15                     | 0.147                  | 0                                | 1                                | 0                                | 0                                | 2                           | 1,325.61                           | 84                  | 95                 | TRUE     |                |
| SNU216_PCL_03     | DUNB11 protein                                       | IP000328798               | 157,129.30                    | 100.00%                            | 4                         | 4                        | 4                       | 0.02%                       | 5.34%                        | EAPGSPPLSPR                      | R                   | G               | 95.00%                                  | 1.76                     | 0.426                  | 0                                | 1                                | 0                                | 0                                | 2                           | 1,267.51                           | 17                  | 27                 | TRUE     |                |
| SNU216_PCL_03     | DUNB11 protein                                       | IP000328798               | 157,129.30                    | 100.00%                            | 4                         | 4                        | 4                       | 0.02%                       | 5.34%                        | RPSDLTISNQMGSPGMHLKSPTLSQVHS     | R                   | S               | 86.20%                                  | 5.9                      | 0.006                  | 0                                | 0                                | 0                                | 1                                | 2                           | 4,443.16                           | 913                 | 953                | TRUE     |                |
| SNU216_PCL_03     | DUNB11 protein                                       | IP000328798               | 157,129.30                    | 100.00%                            | 4                         | 4                        | 4                       | 0.02%                       | 5.34%                        | SPSMAPVSPGWNASPK                 | K                   | T               | 95.00%                                  | 3.32                     | 0.408                  | 0                                | 1                                | 0                                | 0                                | 2                           | 1,677.77                           | 997                 | 1012               | TRUE     |                |
| SNU216_PCL_03     | SEC31L1 protein                                      | IP000305152,IP000746182   | 133,016.80                    | 99.80%                             | 2                         | 2                        | 2                       | 0.01%                       | 3.53%                        | AQGEVAGHESPK                     | R                   | I               | 95.00%                                  | 3.05                     | 0.444                  | 0                                | 1                                | 0                                | 0                                | 2                           | 1,386.61                           | 789                 | 801                | TRUE     |                |
| SNU216_PCL_03     | SEC31L1 protein                                      | IP000305152,IP000746182   | 133,016.80                    | 99.80%                             | 2                         | 2                        | 2                       | 0.01%                       | 3.53%                        | DSQVAQSDGDEESPAAEFQLLGEHIK       | K                   | E               | 95.00%                                  | 3.75                     | 0.387                  | 0                                | 0                                | 1                                | 0                                | 2                           | 2,862.23                           | 520                 | 545                | TRUE     |                |
| SNU216_PCL_03     | CDNA FLJ14681 fis, clone NT2RP2004270, weakly        | IP00064382                | 63,625.30                     | 99.80%                             | 2                         | 2                        | 2                       | 0.01%                       | 10.30%                       | WVEENIPSFSTDVLPVLVDSDEEIMTR      | K                   | S               | 95.00%                                  | 4.35                     | 0.173                  | 0                                | 0                                | 1                                | 0                                | 2                           | 3,271.51                           | 515                 | 542                | TRUE     |                |
| SNU216_PCL_03     | CDNA FLJ14681 fis, clone NT2RP2004270, weakly        | IP00064382                | 63,625.30                     | 99.80%                             | 2                         | 2                        | 2                       | 0.01%                       | 10.30%                       | YAFMPLIDSDDEIEEFMTYSENLTEGK      | R                   | L               | 95.00%                                  | 5.47                     | 0.539                  | 0                                | 0                                | 1                                | 0                                | 2                           | 3,431.48                           | 461                 | 489                | TRUE     |                |
| SNU216_PCL_03     | Isoform 1 of Bromodomain-containing protein 4        | IP000440727               | 152,216.90                    | 100.00%                            | 1                         | 1                        | 1                       | 0.01%                       | 2.35%                        | EAPSLPMHSPMGQSQSLTHQSPFPQNNV     | R                   | K               | 95.00%                                  | 3.69                     | 0.175                  | 0                                | 0                                | 0                                | 1                                | 2                           | 3,677.72                           | 1061                | 1092               | TRUE     |                |
| SNU216_PCL_03     | zinc finger protein 262                              | IP000477949,IP000513965   | 156,931.00                    | 100.00%                            | 3                         | 4                        | 4                       | 0.02%                       | 1.87%                        | HEVNYQNVMVHK                     | R                   | L               | 94.20%                                  | 2.04                     | 0.207                  | 0                                | 0                                | 1                                | 0                                | 2                           | 1,446.65                           | 400                 | 410                | TRUE     |                |
| SNU216_PCL_03     | zinc finger protein 262                              | IP000477949,IP000513965   | 156,931.00                    | 100.00%                            | 3                         | 4                        | 4                       | 0.02%                       | 1.87%                        | VTQKHESDNEIEQIQNK                | R                   | L               | 95.00%                                  | 2.52                     | 0.229                  | 0                                | 1                                | 0                                | 0                                | 2                           | 2,262.01                           | 61                  | 78                 | TRUE     |                |
| SNU216_PCL_03     | zinc finger protein 262                              | IP000477949,IP000513965   | 156,931.00                    | 100.00%                            | 3                         | 4                        | 4                       | 0.02%                       | 1.87%                        | VTQKHESDNEIEQIQNK                | R                   | L               | 95.00%                                  | 4.98                     | 0.329                  | 0                                | 1                                | 1                                | 0                                | 2                           | 2,105.91                           | 62                  | 78                 | TRUE     |                |
| SNU216_PCL_03     | Isoform 1 of ATPase family AAA domain-containin      | IP000170548               | 158,558.10                    | 100.00%                            | 3                         | 4                        | 4                       | 0.02%                       | 4.68%                        | IESDTEETQPTSDVHDNETGNTGESSVEENEI | K                   | Q               | 95.00%                                  | 6.15                     | 0.0829                 | 0                                | 0                                | 1                                | 0                                | 2                           | 3,490.38                           | 1198                | 1228               | TRUE     |                |
| SNU216_PCL_03     | Isoform 1 of ATPase family AAA domain-containin      | IP000170548               | 158,558.10                    | 100.00%                            | 3                         | 4                        | 4                       | 0.02%                       | 4.68%                        | KNIFYSGPASPARPQR                 | R                   | Y               | 95.00%                                  | 2.99                     | 0.354                  | 0                                | 1                                | 1                                | 0                                | 2                           | 1,837.91                           | 317                 | 332                | TRUE     |                |
| SNU216_PCL_03     | Isoform 1 of ATPase family AAA domain-containin      | IP000170548               | 158,558.10                    | 100.00%                            | 3                         | 4                        | 4                       | 0.02%                       | 4.68%                        | QNSTLVGDKRSDDPEQNEK              | K                   | L               | 95.00%                                  | 3.02                     | 0.26                   | 0                                | 1                                | 1                                | 0                                | 2                           | 2,124.96                           | 1129                | 1146               | TRUE     |                |
| SNU216_PCL_03     | Isoform 1 of Putative helicase MOV-10                | IP000444452,IP000646886   | 113,675.50                    | 99.80%                             | 1                         | 1                        | 1                       | 0.01%                       | 1.79%                        | LSPSTSHPHSHDYLQQR                | K                   | E               | 95.00%                                  | 2.7                      | 0.19                   | 0                                | 0                                | 0                                | 2                                | 2,087.92                    | 968                                | 985                 | TRUE               |          |                |
| SNU216_PCL_03     | Isoform 1 of Polymerase I and transcript release f   | IP000176903               | 43,476.50                     | 100.00%                            | 1                         | 1                        | 1                       | 0.01%                       | 6.15%                        | RGSSPDVHHALETTESDAVLVDK          | R                   | S               | 95.00%                                  | 4.15                     | 0.358                  | 0                                | 0                                | 1                                | 0                                | 2                           | 2,740.25                           | 363                 | 386                | TRUE     |                |
| SNU216_PCL_03     | Jumonji/ARID domain-containing protein 1A            | IP000021363,IP000619935   | 195,817.50                    | 99.80%                             | 2                         | 2                        | 2                       | 0.01%                       | 1.74%                        | EKDLDELPLSDLEEGLEETR             | K                   | D               | 95.00%                                  | 3.62                     | 0.536                  | 0                                | 0                                | 1                                | 0                                | 2                           | 2,410.09                           | 1102                | 1121               | TRUE     |                |
| SNU216_PCL_03     | Jumonji/ARID domain-containing protein 1A            | IP000021363,IP000619935   | 195,817.50                    | 99.80%                             | 2                         | 2                        | 2                       | 0.01%                       | 1.74%                        | VVSSVSSSPR                       | R                   | Q               | 95.00%                                  | 1.96                     | 0.351                  | 0                                | 1                                | 0                                | 0                                | 2                           | 1,084.50                           | 13                  |                    |          |                |

Supplemental Table 2. A list of all phosphorylated peptides identified in SNU216 and SNU216-LR.

| MS/MS sample name | Protein name                                           | Protein accession numbers  | Protein molecular weight (Da) | Protein identification probability | Number of unique peptides | Number of unique spectra | Number of total spectra | Percentage of total spectra | Percentage sequence coverage | Peptide sequence              | Previous amino acid | Next amino acid | Best Peptide identification probability | Best SEQUEST XCorr score | Best SEQUEST Dcn score | Number of identified +1H spectra | Number of identified +2H spectra | Number of identified +3H spectra | Number of identified +4H spectra | Number of enzymatic termini | Calculate d +1H Peptide Mass (AMU) | Peptide start index | Peptide stop index | Assigned    | Other Proteins |
|-------------------|--------------------------------------------------------|----------------------------|-------------------------------|------------------------------------|---------------------------|--------------------------|-------------------------|-----------------------------|------------------------------|-------------------------------|---------------------|-----------------|-----------------------------------------|--------------------------|------------------------|----------------------------------|----------------------------------|----------------------------------|----------------------------------|-----------------------------|------------------------------------|---------------------|--------------------|-------------|----------------|
| SNU216_PCL_03     | Isocform 1 of Pinin                                    | IP000418458                | 81,613.20                     | 100.00%                            | 7                         | 9                        | 9                       | 0.06%                       | 13.10%                       | SLSPGKENVSAIDMEK              | K                   | E               | 95.00%                                  | 3.68                     | 0.465                  | 0                                | 1                                | 0                                | 0                                | 2                           | 1,784.81                           | 441                 | 456                | TRUE        |                |
| SNU216_PCL_03     | Isocform 1 of Pinin                                    | IP000418458                | 81,613.20                     | 100.00%                            | 7                         | 9                        | 9                       | 0.06%                       | 13.10%                       | SLSPGKENVSAIDMEKESEEK         | K                   | E               | 95.00%                                  | 4.08                     | 0.434                  | 0                                | 0                                | 1                                | 0                                | 2                           | 2,387.07                           | 441                 | 461                | TRUE        |                |
| SNU216_PCL_03     | WD repeat domain 44 protein                            | IP000444371,IP000552345,IP | 101,587.90                    | 100.00%                            | 4                         | 4                        | 4                       | 0.02%                       | 6.46%                        | EYVSNDAAQSDDEEKLSQPTDTDGGR    | K                   | L               | 95.00%                                  | 3.69                     | 0.387                  | 0                                | 0                                | 1                                | 0                                | 2                           | 3,035.24                           | 396                 | 422                | TRUE        |                |
| SNU216_PCL_03     | WD repeat domain 44 protein                            | IP000444371,IP000552345,IP | 101,587.90                    | 100.00%                            | 4                         | 4                        | 4                       | 0.02%                       | 6.46%                        | NSNGRELTDEELASVMIK            | R                   | N               | 95.00%                                  | 4.02                     | 0.36                   | 0                                | 0                                | 1                                | 0                                | 2                           | 2,172.03                           | 344                 | 362                | TRUE        |                |
| SNU216_PCL_03     | WD repeat domain 44 protein                            | IP000444371,IP000552345,IP | 101,587.90                    | 100.00%                            | 4                         | 4                        | 4                       | 0.02%                       | 6.46%                        | TKEYVSNDAAQSDDEEKLSQPTDTDGGR  | R                   | L               | 95.00%                                  | 3.67                     | 0.434                  | 0                                | 0                                | 0                                | 1                                | 2                           | 3,264.38                           | 394                 | 422                | TRUE        |                |
| SNU216_PCL_03     | WD repeat domain 44 protein                            | IP000444371,IP000552345,IP | 101,587.90                    | 100.00%                            | 4                         | 4                        | 4                       | 0.02%                       | 6.46%                        | VGNESPVQELK                   | K                   | Q               | 95.00%                                  | 2.51                     | 0.37                   | 0                                | 1                                | 0                                | 2                                | 1,279.59                    | 46                                 | 56                  | TRUE               |             |                |
| SNU216_PCL_03     | 103 kDa protein                                        | IP000646058                | 102,769.00                    | 100.00%                            | 3                         | 5                        | 6                       | 0.04%                       | 5.35%                        | ILDILGETCKSEPVK               | K                   | E               | 95.00%                                  | 3.06                     | 0.17                   | 0                                | 1                                | 0                                | 2                                | 1,861.84                    | 217                                | 231                 | TRUE               | IP100005648 |                |
| SNU216_PCL_03     | 103 kDa protein                                        | IP000646058                | 102,769.00                    | 100.00%                            | 3                         | 5                        | 6                       | 0.04%                       | 5.35%                        | MSSPEDDSDTKR                  | K                   | L               | 95.00%                                  | 2.96                     | 0.294                  | 0                                | 2                                | 1                                | 0                                | 2                           | 1,447.54                           | 382                 | 393                | TRUE        |                |
| SNU216_PCL_03     | 103 kDa protein                                        | IP000646058                | 102,769.00                    | 100.00%                            | 3                         | 5                        | 6                       | 0.04%                       | 5.35%                        | SEPVKEESSELEQFPAQDVTSSVGPDRK  | K                   | L               | 95.00%                                  | 6.18                     | 0.457                  | 0                                | 0                                | 1                                | 1                                | 2                           | 3,056.37                           | 227                 | 253                | TRUE        | IP100005648    |
| SNU216_PCL_03     | Activity-dependent neuroprotector                      | IP00022215                 | 123,564.30                    | 100.00%                            | 3                         | 5                        | 8                       | 0.05%                       | 6.81%                        | LMHNASDSEVDQDQDVVEWK          | K                   | D               | 95.00%                                  | 5.32                     | 0.534                  | 0                                | 2                                | 3                                | 0                                | 2                           | 2,296.94                           | 948                 | 966                | TRUE        |                |
| SNU216_PCL_03     | Activity-dependent neuroprotector                      | IP00022215                 | 123,564.30                    | 100.00%                            | 3                         | 5                        | 8                       | 0.05%                       | 6.81%                        | LSNPQIEWQNSTDSEDEGFDMNTDQVA   | R                   | L               | 95.00%                                  | 5.89                     | 0.0982                 | 0                                | 0                                | 1                                | 1                                | 2                           | 4,426.91                           | 1057                | 1096               | TRUE        |                |
| SNU216_PCL_03     | Activity-dependent neuroprotector                      | IP00022215                 | 123,564.30                    | 100.00%                            | 3                         | 5                        | 8                       | 0.05%                       | 6.81%                        | VIPEDASESEKLDQK               | K                   | E               | 95.00%                                  | 2.59                     | 0.212                  | 0                                | 1                                | 0                                | 2                                | 1,896.85                    | 915                                | 930                 | TRUE               |             |                |
| SNU216_PCL_03     | IMP dehydrogenase/GMP reductase family protein         | IP000217626                | 89,031.60                     | 99.40%                             | 2                         | 2                        | 3                       | 0.02%                       | 3.35%                        | FPFEDFRHSPEDFR                | R                   | R               | 87.00%                                  | 2.13                     | 0.199                  | 0                                | 0                                | 1                                | 0                                | 2                           | 1,855.78                           | 567                 | 580                | TRUE        |                |
| SNU216_PCL_03     | IMP dehydrogenase/GMP reductase family protein         | IP000217626                | 89,031.60                     | 99.40%                             | 2                         | 2                        | 3                       | 0.02%                       | 3.35%                        | SRSPLGFFVYHLK                 | R                   | N               | 95.00%                                  | 2.89                     | 0.343                  | 0                                | 0                                | 2                                | 2                                | 2,296.94                    | 948                                | 966                 | TRUE               |             |                |
| SNU216_PCL_03     | leucine rich repeat containing 16                      | IP00014843,IP000746051     | 60,890.80                     | 100.00%                            | 5                         | 7                        | 7                       | 0.04%                       | 4.68%                        | RSSGFISLPESEGG                | K                   | K               | 95.00%                                  | 4.05                     | 0.483                  | 0                                | 1                                | 1                                | 0                                | 2                           | 1,702.77                           | 185                 | 199                | TRUE        |                |
| SNU216_PCL_03     | leucine rich repeat containing 16                      | IP00014843,IP000746051     | 60,890.80                     | 100.00%                            | 5                         | 7                        | 7                       | 0.04%                       | 4.68%                        | RSSGFISLPESEGGK               | K                   | L               | 95.00%                                  | 2.84                     | 0.287                  | 0                                | 0                                | 1                                | 0                                | 2                           | 1,830.86                           | 185                 | 200                | TRUE        |                |
| SNU216_PCL_03     | leucine rich repeat containing 16                      | IP00014843,IP000746051     | 60,890.80                     | 100.00%                            | 5                         | 7                        | 7                       | 0.04%                       | 4.68%                        | SERPPTILMTEPPSSPK             | K                   | G               | 95.00%                                  | 3.44                     | 0.328                  | 0                                | 1                                | 1                                | 0                                | 2                           | 1,978.92                           | 299                 | 315                | TRUE        |                |
| SNU216_PCL_03     | leucine rich repeat containing 16                      | IP00014843,IP000746051     | 60,890.80                     | 100.00%                            | 5                         | 7                        | 7                       | 0.04%                       | 4.68%                        | SWGQQAQEQYEQK                 | R                   | Q               | 95.00%                                  | 3.04                     | 0.29                   | 0                                | 0                                | 1                                | 0                                | 2                           | 1,689.69                           | 505                 | 517                | TRUE        |                |
| SNU216_PCL_03     | leucine rich repeat containing 16                      | IP00014843,IP000746051     | 60,890.80                     | 100.00%                            | 5                         | 7                        | 7                       | 0.04%                       | 4.68%                        | TASRPDDIPDSSPSSPK             | R                   | V               | 95.00%                                  | 3.39                     | 0.467                  | 0                                | 1                                | 0                                | 0                                | 2                           | 1,749.77                           | 452                 | 467                | TRUE        |                |
| SNU216_PCL_03     | Sulfate transporter                                    | IP00032107                 | 81,651.90                     | 99.70%                             | 2                         | 3                        | 3                       | 0.02%                       | 3.65%                        | DSAEGNDSYPGSIHLELQR           | R                   | E               | 95.00%                                  | 4.48                     | 0.571                  | 0                                | 0                                | 1                                | 0                                | 2                           | 2,167.93                           | 15                  | 33                 | TRUE        |                |
| SNU216_PCL_03     | Sulfate transporter                                    | IP00032107                 | 81,651.90                     | 99.70%                             | 2                         | 3                        | 3                       | 0.02%                       | 3.65%                        | EQHNVSPRDSAEGNDSYPGSIHLELQR   | K                   | E               | 94.90%                                  | 4.41                     | 0.104                  | 0                                | 0                                | 1                                | 1                                | 2                           | 3,115.39                           | 7                   | 33                 | TRUE        |                |
| SNU216_PCL_03     | CENP-F kinetochore protein                             | IP00027157                 | 367,594.20                    | 100.00%                            | 3                         | 4                        | 4                       | 0.02%                       | 1.56%                        | SLLGIDTDAIQGR                 | R                   | N               | 95.00%                                  | 2.97                     | 0.406                  | 0                                | 1                                | 0                                | 2                                | 1,567.74                    | 1750                               | 1763                | TRUE               |             |                |
| SNU216_PCL_03     | CENP-F kinetochore protein                             | IP00027157                 | 367,594.20                    | 100.00%                            | 3                         | 4                        | 4                       | 0.02%                       | 1.56%                        | SVPVNNLPERSPTDSPR             | K                   | E               | 95.00%                                  | 2.59                     | 0.226                  | 0                                | 0                                | 1                                | 0                                | 2                           | 2,024.88                           | 3165                | 3181               | TRUE        |                |
| SNU216_PCL_03     | CENP-F kinetochore protein                             | IP00027157                 | 367,594.20                    | 100.00%                            | 3                         | 4                        | 4                       | 0.02%                       | 1.56%                        | VAQRPSPVDSGTILREPTTK          | K                   | S               | 95.00%                                  | 4.33                     | 0.379                  | 0                                | 0                                | 1                                | 0                                | 2                           | 2,135.09                           | 3146                | 3164               | TRUE        |                |
| SNU216_PCL_03     | Protein C14orf4                                        | IP00019205                 | 82,658.10                     | 99.80%                             | 2                         | 2                        | 2                       | 0.01%                       | 3.77%                        | KASPEPDSAEALK                 | R                   | L               | 95.00%                                  | 3.91                     | 0.495                  | 0                                | 1                                | 0                                | 0                                | 2                           | 1,576.73                           | 545                 | 559                | TRUE        |                |
| SNU216_PCL_03     | Protein C14orf4                                        | IP00019205                 | 82,658.10                     | 99.80%                             | 2                         | 2                        | 2                       | 0.01%                       | 3.77%                        | NSSSPVSPASVPGQR               | R                   | R               | 95.00%                                  | 2.52                     | 0.299                  | 0                                | 1                                | 0                                | 0                                | 2                           | 1,629.67                           | 656                 | 670                | TRUE        |                |
| SNU216_PCL_03     | Isocform 1 of PHD finger protein 6                     | IP000395568                | 41,290.50                     | 99.80%                             | 1                         | 1                        | 1                       | 0.01%                       | 6.58%                        | TAHNSEADLEESFNHELEPSSPK       | K                   | S               | 95.00%                                  | 5.29                     | 0.461                  | 0                                | 0                                | 1                                | 0                                | 2                           | 2,777.16                           | 134                 | 157                | TRUE        |                |
| SNU216_PCL_03     | Isocform 1 of Eukaryotic translation initiation factor | IP000646377                | 176,655.90                    | 100.00%                            | 3                         | 3                        | 3                       | 0.02%                       | 1.58%                        | GGSSKDLLDNQSQEEQR             | R                   | R               | 95.00%                                  | 2.49                     | 0.179                  | 0                                | 0                                | 1                                | 0                                | 2                           | 1,970.85                           | 1154                | 1170               | TRUE        |                |
| SNU216_PCL_03     | Isocform 1 of Eukaryotic translation initiation factor | IP000646377                | 176,655.90                    | 100.00%                            | 3                         | 3                        | 3                       | 0.02%                       | 1.58%                        | GGSSKDLLDNQSQEEQRR            | R                   | E               | 95.00%                                  | 2.6                      | 0.319                  | 0                                | 0                                | 1                                | 0                                | 2                           | 2,126.95                           | 1154                | 1171               | TRUE        |                |
| SNU216_PCL_03     | Isocform 1 of Eukaryotic translation initiation factor | IP000646377                | 176,655.90                    | 100.00%                            | 3                         | 3                        | 3                       | 0.02%                       | 1.58%                        | SPSPVLR                       | K                   | L               | 95.00%                                  | 1.74                     | 0.341                  | 0                                | 1                                | 0                                | 0                                | 2                           | 835.4074                           | 230                 | 236                | TRUE        |                |
| SNU216_PCL_03     | Isocform Long of Restin                                | IP00027172,IP000217113     | 156,784.40                    | 100.00%                            | 5                         | 5                        | 5                       | 0.03%                       | 3.78%                        | KISGTTALQEALEK                | R                   | E               | 95.00%                                  | 2.83                     | 0.434                  | 0                                | 1                                | 0                                | 0                                | 2                           | 1,439.75                           | 346                 | 358                | TRUE        |                |
| SNU216_PCL_03     | Isocform Long of Restin                                | IP00027172,IP000217113     | 156,784.40                    | 100.00%                            | 5                         | 5                        | 5                       | 0.03%                       | 3.78%                        | KISGTTALQEALEK                | R                   | Q               | 95.00%                                  | 3.06                     | 0.341                  | 0                                | 0                                | 1                                | 0                                | 2                           | 1,696.89                           | 346                 | 360                | TRUE        |                |
| SNU216_PCL_03     | Isocform Long of Restin                                | IP00027172,IP000217113     | 156,784.40                    | 100.00%                            | 5                         | 5                        | 5                       | 0.03%                       | 3.78%                        | SPSASSLSMSSVASSVSSR           | R                   | P               | 95.00%                                  | 4.68                     | 0.0635                 | 0                                | 1                                | 0                                | 0                                | 2                           | 1,980.86                           | 310                 | 329                | TRUE        |                |
| SNU216_PCL_03     | Isocform Long of Restin                                | IP00027172,IP000217113     | 156,784.40                    | 100.00%                            | 5                         | 5                        | 5                       | 0.03%                       | 3.78%                        | SPSASSLSMSSVASSVSSRPSR        | R                   | T               | 95.00%                                  | 2.55                     | 0.199                  | 0                                | 0                                | 1                                | 0                                | 2                           | 2,321.04                           | 310                 | 332                | TRUE        |                |
| SNU216_PCL_03     | Isocform Long of Restin                                | IP00027172,IP000217113     | 156,784.40                    | 100.00%                            | 5                         | 5                        | 5                       | 0.03%                       | 3.78%                        | TASESINLSAEAGSK               | K                   | K               | 95.00%                                  | 2.95                     | 0.319                  | 0                                | 1                                | 0                                | 0                                | 2                           | 1,673.76                           | 191                 | 206                | TRUE        |                |
| SNU216_PCL_03     | Eukaryotic translation initiation factor 3 subunit 8   | IP00016910                 | 105,347.20                    | 99.80%                             | 1                         | 1                        | 1                       | 0.01%                       | 1.53%                        | QPLLSEDEDTKR                  | K                   | V               | 95.00%                                  | 3.53                     | 0.155                  | 0                                | 0                                | 1                                | 0                                | 2                           | 1,752.81                           | 34                  | 47                 | TRUE        |                |
| SNU216_PCL_03     | Isocform 3 of Ribosome-binding protein 1               | IP000215743                | 152,713.70                    | 100.00%                            | 3                         | 5                        | 6                       | 0.04%                       | 3.39%                        | NTDVAQSPAPKQEAAPAK            | R                   | K               | 95.00%                                  | 3.84                     | 0.42                   | 0                                | 0                                | 1                                | 0                                | 2                           | 1,960.90                           | 609                 | 626                | TRUE        |                |
| SNU216_PCL_03     | Isocform 3 of Ribosome-binding protein 1               | IP000215743                | 152,713.70                    | 100.00%                            | 3                         | 5                        | 6                       | 0.04%                       | 3.39%                        | NTDVAQSPAPKQEAAPAKK           | R                   | K               | 95.00%                                  | 3.13                     | 0.215                  | 0                                | 1                                | 1                                | 0                                | 2                           | 2,089.00                           | 609                 | 627                | TRUE        |                |
| SNU216_PCL_03     | Isocform 3 of Ribosome-binding protein 1               | IP000215743                | 152,713.70                    | 100.00%                            | 3                         | 5                        | 6                       | 0.04%                       | 3.39%                        | SHVEDGDIAGAPASSPEAPPAEQDPVQLK | K                   | T               | 95.00%                                  | 4.35                     | 0.51                   | 0                                | 0                                | 2                                | 0                                | 2                           | 3,072.32                           | 1263                | 1291               | TRUE        |                |
| SNU216_PCL_03     | PHD finger protein 2                                   | IP000260388,IP000376493,IP | 120,995.70                    | 100.00%                            | 5                         | 7                        | 8                       | 0.05%                       | 4.72%                        | DSQVYVPSLEDEDNPIFK            | K                   | S               | 95.00%                                  | 3.14                     | 0.298                  | 0                                | 1                                | 1                                | 0                                | 2                           | 2,312.95                           | 872                 | 890                | TRUE        |                |
| SNU216_PCL_03     | PHD finger protein 2                                   | IP000260388,IP000376493,IP | 120,995.70                    | 100.00%                            | 5                         | 7                        | 8                       | 0.05%                       | 4.72%                        | ESASPTPINLDLEAHTK             | R                   | E               | 95.00%                                  | 2.93                     | 0.328                  | 0                                | 1                                | 1                                | 0                                | 2                           | 2,015.97                           | 536                 | 553                | TRUE        |                |
| SNU216_PCL_03     | PHD finger protein 2                                   | IP000260388,IP000376493,IP | 120,995.70                    | 100.00%                            | 5                         | 7                        | 8                       | 0.05%                       | 4.72%                        | GSDDAPYSPTAR                  | K                   | V               | 95.00%                                  | 2.38                     | 0.323                  | 0                                | 1                                | 0                                | 0                                | 2                           | 1,316.52                           | 898                 | 909                | TRUE        |                |
| SNU216_PCL_03     | PHD finger protein 2                                   | IP000260388,IP000376493,IP | 120,995.70                    | 100.00%                            | 5                         | 7                        | 8                       | 0.05%                       | 4.72%                        | GSDDAPYSPTAR                  | R                   | V               | 95.00%                                  | 2.92                     | 0.307                  | 0                                | 2                                | 0                                | 0                                | 2                           | 1,444.61                           | 897                 | 909                | TRUE        |                |
| SNU216_PCL_03     | PHD finger protein 2                                   | IP000260388,IP000376493,IP | 120,995.70                    | 100.00%                            | 5                         | 7                        | 8                       | 0.05%                       | 4.72%                        | SRESASPTPINLDLEAHTK           | K                   | E               | 93.70%                                  | 3.1                      | 0.156                  | 0                                | 0                                | 1                                | 0                                | 2                           | 2,259.10                           | 534                 | 553                | TRUE        |                |
| SNU216_PCL_03     | Isocform 1 of Actin-binding protein anillin            | IP000657687,IP000743594    | 124,201.60                    | 100.00%                            | 3                         | 3                        | 3                       | 0.02%                       | 5.07%                        | AESGDSLSEDRDLLYSIDAYR         | R                   | S               | 95.00%                                  | 3.38                     | 0.348                  | 0                                | 0                                | 1                                | 0                                | 2                           | 2,512.09                           | 656                 | 677                | TRUE        |                |
| SNU216_PCL_03     | Isocform 1 of Actin-binding protein anillin            | IP000657687,IP000743594    | 124,201.60                    | 100.00%                            | 3                         | 3                        | 3                       | 0.02%                       | 5.07%                        | ARQPLSEASNQPLSDGEEK           | R                   | S               | 95.00%                                  | 3.7                      | 0.29                   | 0                                | 0                                | 1                                | 0                                | 2                           | 2,206.01                           | 40                  | 59                 | TRUE        |                |
| SNU216_PCL_03     | Isocform 1 of Actin-binding protein anillin            | IP000657687,IP000743594    | 124,201.60                    | 100.00%                            | 3                         | 3                        | 3                       | 0.02%                       | 5.07%                        | ATSPVKSTTTSITDAK              | K                   | S               | 95.00%                                  | 3.02                     | 0.481                  | 0                                | 1                                | 0                                | 0                                | 2                           | 1,586.77                           | 293                 | 307                | TRUE        |                |
| SNU216_PCL_03     | Isocform 1 of Heterogeneous nuclear ribonucleoprotein  | IP000216049                | 50,978.50                     | 100.00%                            | 2                         | 2                        | 2                       | 0.01%                       | 1.94%                        | DYDDMSPR                      | R                   | R               | 95.00%                                  | 1.42                     | 0.327                  | 0                                | 1                                | 0                                | 0                                | 2                           | 1,078.35                           | 279                 | 286                | TRUE        |                |
| SNU216_PCL_03     | Isocform 1 of Heterogeneous nuclear ribonucleoprotein  | IP000216049                | 50,978.50                     | 100.00%                            | 2                         | 2                        | 2                       | 0.01%                       | 1.94%                        | RDYDDMSPR                     | R                   | R               | 95.00%                                  | 2.04                     | 0.249                  | 0                                | 1                                | 0                                | 0                                | 2                           | 1,234.46                           | 278                 | 286                | TRUE        |                |
| SNU216_PCL_03     | MORC family CW-type zinc finger 2                      | IP000455518                | 110,726.90                    | 100.00%                            | 3                         | 4                        | 4                       | 0.02%                       | 4.12%                        | KTESPIKLSPATPSR               | K                   | K               | 95.00%                                  | 3.54                     | 0.252                  | 0                                | 1                                | 1                                | 0                                | 2                           | 1,691.87                           | 660                 | 674                | TRUE        |                |
| SNU216_PCL_03     | MORC family CW-type zinc finger 2                      | IP000455518                | 110,726.90                    | 100.00%                            | 3                         | 4                        | 4                       | 0.02%                       | 4.12%                        | SPPLPAVR                      | R                   | N               | 95.00%                                  | 1.74                     | 0.314                  | 0                                | 1                                | 0                                | 0                                | 2                           | 1,029.55                           | 553                 | 561                | TRUE        |                |
| SNU216_PCL_03     | MORC family CW-type zinc finger 2                      | IP000455518                | 110,726.90                    |                                    |                           |                          |                         |                             |                              |                               |                     |                 |                                         |                          |                        |                                  |                                  |                                  |                                  |                             |                                    |                     |                    |             |                |

Supplemental Table 2. List of all phosphorylated peptides identified in SNU216 and SNU216-LR.

| MS/MS sample name | Protein name                                     | Protein accession numbers  | Protein molecular weight (Da) | Protein identification probability | Number of unique peptides | Number of unique spectra | Number of total spectra | Percentage of total spectra | Percentage sequence coverage | Peptide sequence                | Previous amino acid | Next amino acid | Best Peptide identification probability | Best SEQUEST XCorr score | Best SEQUEST Dcn score | Number of identified +1H spectra | Number of identified +2H spectra | Number of identified +3H spectra | Number of identified +4H spectra | Number of enzymatic termini | Calculate d +1H Peptide Mass (AMU) | Peptide start index | Peptide stop index | Assigned | Other Proteins |
|-------------------|--------------------------------------------------|----------------------------|-------------------------------|------------------------------------|---------------------------|--------------------------|-------------------------|-----------------------------|------------------------------|---------------------------------|---------------------|-----------------|-----------------------------------------|--------------------------|------------------------|----------------------------------|----------------------------------|----------------------------------|----------------------------------|-----------------------------|------------------------------------|---------------------|--------------------|----------|----------------|
| SNU216_PCL_03     | zinc finger transcription factor TRPS1           | IP000296078                | 143,023.70                    | 99.90%                             | 1                         | 1                        | 1                       | 0.01%                       | 1.16%                        | TLRDSNVNAAHLAR                  | K                   | P               | 95.00%                                  | 3.7                      | 0.32                   | 0                                | 0                                | 1                                | 0                                | 2                           | 1,729.84                           | 839                 | 853                | TRUE     |                |
| SNU216_PCL_03     | OTTHUMP00000022614                               | IP000385729,IP000477436,IP | 74,832.20                     | 100.00%                            | 2                         | 3                        | 3                       | 0.02%                       | 3.98%                        | ADDFVVRDDPSDVTDEDEGPAEPPPPPK    | R                   | L               | 95.00%                                  | 3.64                     | 0.369                  | 0                                | 0                                | 1                                | 0                                | 2                           | 3,164.27                           | 543                 | 570                | TRUE     |                |
| SNU216_PCL_03     | OTTHUMP00000022614                               | IP000385729,IP000477436,IP | 74,832.20                     | 100.00%                            | 2                         | 3                        | 3                       | 0.02%                       | 3.98%                        | RADDFVVRDDPSDVTDEDEGPAEPPPPPK   | R                   | L               | 95.00%                                  | 3.97                     | 0.325                  | 0                                | 0                                | 1                                | 1                                | 2                           | 3,320.37                           | 542                 | 570                | TRUE     |                |
| SNU216_PCL_03     | nadrin isoform 1                                 | IP000064767                | 95,437.00                     | 99.80%                             | 2                         | 2                        | 2                       | 0.01%                       | 6.58%                        | AESSGGGTVPSSAGILEQGPSGDGSPKPF   | R                   | D               | 95.00%                                  | 3.3                      | 0.306                  | 0                                | 0                                | 1                                | 0                                | 2                           | 3,015.39                           | 549                 | 580                | TRUE     |                |
| SNU216_PCL_03     | nadrin isoform 1                                 | IP000064767                | 95,437.00                     | 99.80%                             | 2                         | 2                        | 2                       | 0.01%                       | 6.58%                        | SFSPPTQHTGQPPGQSPASQLSAPR       | R                   | R               | 95.00%                                  | 4.14                     | 0.431                  | 0                                | 0                                | 1                                | 0                                | 2                           | 2,687.26                           | 674                 | 699                | TRUE     |                |
| SNU216_PCL_03     | Isoform 1 of Serine/threonine-protein kinase WNI | IP000004472,IP000397590,IP | 250,750.30                    | 100.00%                            | 2                         | 2                        | 2                       | 0.01%                       | 1.39%                        | DVDDGSGSPHSQLSSK                | R                   | S               | 95.00%                                  | 1.68                     | 0.345                  | 0                                | 1                                | 0                                | 2                                | 2,009.76                    | 2022                               | 2039                | TRUE               |          |                |
| SNU216_PCL_03     | Isoform 1 of Serine/threonine-protein kinase WNI | IP000004472,IP000397590,IP | 250,750.30                    | 100.00%                            | 2                         | 2                        | 2                       | 0.01%                       | 1.39%                        | SGSGGSGSAKEPQEEER               | R                   | S               | 95.00%                                  | 2.47                     | 0.265                  | 0                                | 1                                | 0                                | 2                                | 1,635.60                    | 183                                | 197                 | TRUE               |          |                |
| SNU216_PCL_03     | Isoform 1 of Probable helicase senataxin         | IP000142538,IP000719643    | 302,955.50                    | 99.90%                             | 1                         | 1                        | 1                       | 0.01%                       | 0.56%                        | KSSPFKDLMTVPESR                 | K                   | D               | 95.00%                                  | 3.9                      | 0.432                  | 0                                | 0                                | 1                                | 0                                | 2                           | 1,801.86                           | 909                 | 923                | TRUE     |                |
| SNU216_PCL_03     | KIAA1187 protein                                 | IP000645814,IP000654605    | 92,820.20                     | 100.00%                            | 5                         | 7                        | 9                       | 0.06%                       | 8.47%                        | ESAAPASPAESPAPSPTPAPPQK         | K                   | E               | 95.00%                                  | 2.16                     | 0.373                  | 0                                | 2                                | 2                                | 0                                | 2                           | 2,233.05                           | 538                 | 560                | TRUE     |                |
| SNU216_PCL_03     | KIAA1187 protein                                 | IP000645814,IP000654605    | 92,820.20                     | 100.00%                            | 5                         | 7                        | 9                       | 0.06%                       | 8.47%                        | GPTTPAMGPR                      | R                   | D               | 95.00%                                  | 2.06                     | 0.418                  | 0                                | 1                                | 0                                | 0                                | 2                           | 1,060.46                           | 95                  | 104                | TRUE     |                |
| SNU216_PCL_03     | KIAA1187 protein                                 | IP000645814,IP000654605    | 92,820.20                     | 100.00%                            | 5                         | 7                        | 9                       | 0.06%                       | 8.47%                        | LSASTASELSPK                    | R                   | S               | 95.00%                                  | 2.12                     | 0.254                  | 0                                | 1                                | 0                                | 0                                | 2                           | 1,270.59                           | 451                 | 462                | TRUE     |                |
| SNU216_PCL_03     | KIAA1187 protein                                 | IP000645814,IP000654605    | 92,820.20                     | 100.00%                            | 5                         | 7                        | 9                       | 0.06%                       | 8.47%                        | RSSQSPSPITAVPASDSPPTK           | R                   | Q               | 95.00%                                  | 3.26                     | 0.33                   | 0                                | 1                                | 1                                | 0                                | 2                           | 1,989.93                           | 111                 | 129                | TRUE     |                |
| SNU216_PCL_03     | KIAA1187 protein                                 | IP000645814,IP000654605    | 92,820.20                     | 100.00%                            | 5                         | 7                        | 9                       | 0.06%                       | 8.47%                        | RSSQSPSPITAVPASDSPPTKQEVK       | R                   | K               | 95.00%                                  | 3.99                     | 0.371                  | 0                                | 0                                | 1                                | 0                                | 2                           | 2,474.19                           | 111                 | 133                | TRUE     |                |
| SNU216_PCL_03     | glutamyl-prolyl tRNA synthetase                  | IP00013452                 | 170,593.20                    | 100.00%                            | 1                         | 1                        | 1                       | 0.01%                       | 1.46%                        | TGKEYIPGQPLSQSSDSSPTR           | K                   | N               | 87.30%                                  | 3.64                     | 0.0005                 | 0                                | 1                                | 0                                | 0                                | 2                           | 2,412.11                           | 868                 | 889                | TRUE     |                |
| SNU216_PCL_03     | PHD finger protein 3                             | IP000170770                | 229,481.10                    | 100.00%                            | 4                         | 4                        | 5                       | 0.03%                       | 4.76%                        | HSNDNEAESIADSLSSNLAASEFFEEKQESI | K                   | S               | 95.00%                                  | 6.57                     | 0.249                  | 0                                | 0                                | 0                                | 1                                | 2                           | 3,819.68                           | 1147                | 1180               | TRUE     |                |
| SNU216_PCL_03     | PHD finger protein 3                             | IP000170770                | 229,481.10                    | 100.00%                            | 4                         | 4                        | 5                       | 0.03%                       | 4.76%                        | KHSDNEAESIADSLSSNLAASEFFEEKQEI  | R                   | S               | 95.00%                                  | 4.56                     | 0.218                  | 0                                | 0                                | 0                                | 2                                | 2                           | 3,947.77                           | 1146                | 1180               | TRUE     |                |
| SNU216_PCL_03     | PHD finger protein 3                             | IP000170770                | 229,481.10                    | 100.00%                            | 4                         | 4                        | 5                       | 0.03%                       | 4.76%                        | STSPAPRPFMPTGVVESTFLAR          | K                   | L               | 95.00%                                  | 3.21                     | 0.294                  | 0                                | 0                                | 0                                | 2                                | 2                           | 2,686.26                           | 1181                | 1204               | TRUE     |                |
| SNU216_PCL_03     | PHD finger protein 3                             | IP000170770                | 229,481.10                    | 100.00%                            | 4                         | 4                        | 5                       | 0.03%                       | 4.76%                        | VAGNPSPVENIQTSQAIAQKLQEDILMQI   | K                   | R               | 95.00%                                  | 3.69                     | 0.308                  | 0                                | 0                                | 0                                | 1                                | 2                           | 4,370.11                           | 1718                | 1755               | TRUE     |                |
| SNU216_PCL_03     | Isoform 1 of Myb-binding protein 1A              | IP00005024,IP000607584     | 149,371.00                    | 100.00%                            | 8                         | 9                        | 13                      | 0.08%                       | 9.71%                        | ALGGEDESENEELGDEAMMALDQSLASLFI  | K                   | L               | 95.00%                                  | 7.65                     | 0.654                  | 0                                | 0                                | 1                                | 0                                | 2                           | 3,607.53                           | 769                 | 801                | TRUE     |                |
| SNU216_PCL_03     | Isoform 1 of Myb-binding protein 1A              | IP00005024,IP000607584     | 149,371.00                    | 100.00%                            | 8                         | 9                        | 13                      | 0.08%                       | 9.71%                        | DPAQPMSPGEGATQSGAR              | R                   | P               | 95.00%                                  | 3.23                     | 0.445                  | 0                                | 2                                | 0                                | 0                                | 2                           | 1,779.74                           | 5                   | 21                 | TRUE     |                |
| SNU216_PCL_03     | Isoform 1 of Myb-binding protein 1A              | IP00005024,IP000607584     | 149,371.00                    | 100.00%                            | 8                         | 9                        | 13                      | 0.08%                       | 9.71%                        | DPAQPMSPGEGATQSGARPADR          | R                   | Y               | 87.10%                                  | 2.57                     | 0.164                  | 0                                | 0                                | 1                                | 0                                | 2                           | 2,218.96                           | 5                   | 25                 | TRUE     |                |
| SNU216_PCL_03     | Isoform 1 of Myb-binding protein 1A              | IP00005024,IP000607584     | 149,371.00                    | 100.00%                            | 8                         | 9                        | 13                      | 0.08%                       | 9.71%                        | KPISATQSPISK                    | K                   | K               | 95.00%                                  | 2.08                     | 0.352                  | 0                                | 1                                | 0                                | 0                                | 2                           | 1,417.60                           | 1156                | 1167               | TRUE     |                |
| SNU216_PCL_03     | Isoform 1 of Myb-binding protein 1A              | IP00005024,IP000607584     | 149,371.00                    | 100.00%                            | 8                         | 9                        | 13                      | 0.08%                       | 9.71%                        | KVGLGKPSLALAR                   | K                   | K               | 95.00%                                  | 3.09                     | 0.489                  | 0                                | 0                                | 1                                | 0                                | 2                           | 1,476.83                           | 1284                | 1297               | TRUE     |                |
| SNU216_PCL_03     | Isoform 1 of Myb-binding protein 1A              | IP00005024,IP000607584     | 149,371.00                    | 100.00%                            | 8                         | 9                        | 13                      | 0.08%                       | 9.71%                        | KNQKPSVNGAPGSPTEPAGQK           | K                   | Q               | 95.00%                                  | 4.16                     | 0.313                  | 0                                | 0                                | 2                                | 2                                | 2,300.10                    | 1254                               | 1275                | TRUE               |          |                |
| SNU216_PCL_03     | Isoform 1 of Myb-binding protein 1A              | IP00005024,IP000607584     | 149,371.00                    | 100.00%                            | 8                         | 9                        | 13                      | 0.08%                       | 9.71%                        | NKQPSQVNGAPGSPTEPAGQK           | K                   | Q               | 95.00%                                  | 4.08                     | 0.426                  | 0                                | 2                                | 2                                | 2                                | 2,172.01                    | 1255                               | 1275                | TRUE               |          |                |
| SNU216_PCL_03     | Isoform 1 of Myb-binding protein 1A              | IP00005024,IP000607584     | 149,371.00                    | 100.00%                            | 8                         | 9                        | 13                      | 0.08%                       | 9.71%                        | RKSEDDGTPAEDGTPAATGSGSQPPSMGR   | K                   | K               | 95.00%                                  | 3.19                     | 0.401                  | 0                                | 0                                | 1                                | 0                                | 2                           | 2,737.19                           | 1184                | 1210               | TRUE     |                |
| SNU216_PCL_03     | Midasin                                          | IP000167941                | 632,826.30                    | 100.00%                            | 2                         | 2                        | 2                       | 0.01%                       | 0.61%                        | AEENTDQASQEDYAGFER              | K                   | L               | 95.00%                                  | 3.36                     | 0.362                  | 0                                | 0                                | 1                                | 0                                | 2                           | 2,236.87                           | 4530                | 4548               | TRUE     |                |
| SNU216_PCL_03     | Midasin                                          | IP000167941                | 632,826.30                    | 100.00%                            | 2                         | 2                        | 2                       | 0.01%                       | 0.61%                        | EDSDTEECVPEALER                 | R                   | K               | 95.00%                                  | 3.33                     | 0.481                  | 0                                | 1                                | 0                                | 0                                | 2                           | 1,826.73                           | 5013                | 5027               | TRUE     |                |
| SNU216_PCL_03     | SMARCA4 isoform 2                                | IP00029822,IP000293426     | 188,152.60                    | 100.00%                            | 7                         | 9                        | 9                       | 0.06%                       | 4.82%                        | AKPVVSDDDSSEEQEEDE              | R                   | S               | 95.00%                                  | 2.5                      | 0.401                  | 0                                | 1                                | 1                                | 0                                | 2                           | 2,236.82                           | 1654                | 1671               | TRUE     |                |
| SNU216_PCL_03     | SMARCA4 isoform 2                                | IP00029822,IP000293426     | 188,152.60                    | 100.00%                            | 7                         | 9                        | 9                       | 0.06%                       | 4.82%                        | SDAGSSTPTTSTR                   | R                   | S               | 90.90%                                  | 2.43                     | 0.143                  | 0                                | 0                                | 1                                | 0                                | 2                           | 1,462.57                           | 1448                | 1461               | TRUE     |                |
| SNU216_PCL_03     | SMARCA4 isoform 2                                | IP00029822,IP000293426     | 188,152.60                    | 100.00%                            | 7                         | 9                        | 9                       | 0.06%                       | 4.82%                        | IPDPDSDDVSEVDAR                 | K                   | H               | 95.00%                                  | 3.34                     | 0.413                  | 0                                | 1                                | 0                                | 0                                | 2                           | 1,709.69                           | 690                 | 704                | TRUE     |                |
| SNU216_PCL_03     | SMARCA4 isoform 2                                | IP00029822,IP000293426     | 188,152.60                    | 100.00%                            | 7                         | 9                        | 9                       | 0.06%                       | 4.82%                        | IPDPDSDDVSEVDAR                 | K                   | H               | 95.00%                                  | 3.73                     | 0.551                  | 0                                | 1                                | 1                                | 0                                | 2                           | 1,837.79                           | 689                 | 704                | TRUE     |                |
| SNU216_PCL_03     | SMARCA4 isoform 2                                | IP00029822,IP000293426     | 188,152.60                    | 100.00%                            | 7                         | 9                        | 9                       | 0.06%                       | 4.82%                        | KKPPDPDSDDVSEVDAR               | K                   | H               | 95.00%                                  | 3.5                      | 0.449                  | 0                                | 0                                | 1                                | 0                                | 2                           | 1,965.88                           | 688                 | 704                | TRUE     |                |
| SNU216_PCL_03     | SMARCA4 isoform 2                                | IP00029822,IP000293426     | 188,152.60                    | 100.00%                            | 7                         | 9                        | 9                       | 0.06%                       | 4.82%                        | RKSDAGSSTPTTSTR                 | R                   | S               | 95.00%                                  | 2.46                     | 0.413                  | 0                                | 1                                | 0                                | 0                                | 2                           | 1,746.77                           | 1446                | 1461               | TRUE     |                |
| SNU216_PCL_03     | SMARCA4 isoform 2                                | IP00029822,IP000293426     | 188,152.60                    | 100.00%                            | 7                         | 9                        | 9                       | 0.06%                       | 4.82%                        | QKIEKDDSEGESEEEEEEGESESSESR     | R                   | S               | 95.00%                                  | 2.02                     | 0.475                  | 0                                | 0                                | 1                                | 0                                | 2                           | 3,684.27                           | 1594                | 1623               | TRUE     |                |
| SNU216_PCL_03     | Isoform Long of Spectrin beta chain, brain 1     | IP000050614                | 274,635.40                    | 100.00%                            | 4                         | 4                        | 4                       | 0.02%                       | 2.62%                        | AQLTPTSVVITSESSPGKR             | R                   | E               | 95.00%                                  | 4.12                     | 0.0423                 | 0                                | 1                                | 0                                | 0                                | 2                           | 2,139.07                           | 2326                | 2345               | TRUE     |                |
| SNU216_PCL_03     | Isoform Long of Spectrin beta chain, brain 1     | IP000050614                | 274,635.40                    | 100.00%                            | 4                         | 4                        | 4                       | 0.02%                       | 2.62%                        | GEQVSNQLPAEQGSFR                | K                   | M               | 95.00%                                  | 2.58                     | 0.273                  | 0                                | 1                                | 0                                | 0                                | 2                           | 1,833.81                           | 2124                | 2140               | TRUE     |                |
| SNU216_PCL_03     | Isoform Long of Spectrin beta chain, brain 1     | IP000050614                | 274,635.40                    | 100.00%                            | 4                         | 4                        | 4                       | 0.02%                       | 2.62%                        | RPPSPPESTK                      | R                   | V               | 93.80%                                  | 1.91                     | 0.264                  | 0                                | 1                                | 0                                | 0                                | 2                           | 1,175.55                           | 2099                | 2108               | TRUE     |                |
| SNU216_PCL_03     | Isoform Long of Spectrin beta chain, brain 1     | IP000050614                | 274,635.40                    | 100.00%                            | 4                         | 4                        | 4                       | 0.02%                       | 2.62%                        | VSEAEESQQWDTSKGEQVSNQLPAEQK     | K                   | M               | 95.00%                                  | 5.81                     | 0.452                  | 0                                | 0                                | 1                                | 0                                | 2                           | 3,566.57                           | 2109                | 2140               | TRUE     |                |
| SNU216_PCL_03     | hypothetical protein LOC286077                   | IP000394829                | 127,102.90                    | 100.00%                            | 10                        | 12                       | 13                      | 0.08%                       | 12.10%                       | AVPAPSGPTHNSPELGRPPAAGVLAPDM    | R                   | C               | 95.00%                                  | 3.81                     | 0.234                  | 0                                | 0                                | 1                                | 2                                | 3,456.66                    | 1056                               | 1089                | TRUE               |          |                |
| SNU216_PCL_03     | hypothetical protein LOC286077                   | IP000394829                | 127,102.90                    | 100.00%                            | 10                        | 12                       | 13                      | 0.08%                       | 12.10%                       | GSPTSAYPER                      | K                   | K               | 95.00%                                  | 1.83                     | 0.457                  | 0                                | 1                                | 0                                | 0                                | 2                           | 1,144.47                           | 869                 | 878                | TRUE     |                |
| SNU216_PCL_03     | hypothetical protein LOC286077                   | IP000394829                | 127,102.90                    | 100.00%                            | 10                        | 12                       | 13                      | 0.08%                       | 12.10%                       | GSPVPVPVER                      | R                   | R               | 93.80%                                  | 1.75                     | 0.316                  | 0                                | 0                                | 1                                | 0                                | 2                           | 1,114.53                           | 913                 | 922                | TRUE     |                |
| SNU216_PCL_03     | hypothetical protein LOC286077                   | IP000394829                | 127,102.90                    | 100.00%                            | 10                        | 12                       | 13                      | 0.08%                       | 12.10%                       | HGSDPAFAGPR                     | R                   | G               | 95.00%                                  | 2.69                     | 0.405                  | 0                                | 1                                | 1                                | 0                                | 2                           | 1,288.55                           | 521                 | 532                | TRUE     |                |
| SNU216_PCL_03     | hypothetical protein LOC286077                   | IP000394829                | 127,102.90                    | 100.00%                            | 10                        | 12                       | 13                      | 0.08%                       | 12.10%                       | RGSLTLTISGESPK                  | R                   | A               | 95.00%                                  | 2.52                     | 0.237                  | 0                                | 0                                | 1                                | 0                                | 2                           | 1,525.76                           | 934                 | 947                | TRUE     |                |
| SNU216_PCL_03     | hypothetical protein LOC286077                   | IP000394829                | 127,102.90                    | 100.00%                            | 10                        | 12                       | 13                      | 0.08%                       | 12.10%                       | RGSPVPVPVER                     | R                   | R               | 95.00%                                  | 2.4                      | 0.252                  | 0                                | 1                                | 1                                | 0                                | 2                           | 1,270.63                           | 912                 | 922                | TRUE     |                |
| SNU216_PCL_03     | hypothetical protein LOC286077                   | IP000394829                | 127,102.90                    | 100.00%                            | 10                        | 12                       | 13                      | 0.08%                       | 12.10%                       | RGSPVPVPVER                     | R                   | S               | 95.00%                                  | 3.06                     | 0.196                  | 0                                | 0                                | 1                                | 0                                | 2                           | 1,426.73                           | 912                 | 923                | TRUE     |                |
| SNU216_PCL_03     | hypothetical protein LOC286077                   | IP000394829                | 127,102.90                    | 100.00%                            | 10                        | 12                       | 13                      | 0.08%                       | 12.10%                       | RLSLGQGDSTEAAATEER              | R                   | G               | 95.00%                                  | 3.23                     | 0.29                   | 0                                | 0                                | 1                                | 0                                | 2                           | 1,899.84                           | 1001                | 1017               | TRUE     |                |
| SNU216_PCL_03     | hypothetical protein LOC286077                   | IP000394829                | 127,102.90                    | 100.00%                            | 10                        | 12                       | 13                      | 0.08%                       | 12.10%                       | RMEDEGGFVPQENGQSPESPR           | R                   | L               | 95.00%                                  | 2.87                     | 0.272                  | 0                                | 0                                | 2                                | 2                                | 2,592.13                    | 980                                | 1001                | TRUE               |          |                |
| SNU216_PCL_03     | hypothetical protein LOC286077                   | IP000394829                | 127,102.90                    | 100.00%                            | 10                        | 12                       | 13                      | 0.08%                       | 12.10%                       | VPAAFPKTVPPVPGSGGNGPR           | R                   | E               | 95.00%                                  | 4.09                     | 0.27                   | 0                                | 0                                | 1                                | 0                                | 2                           | 2,268.12                           | 632                 | 654                | TRUE     |                |
| SNU216_PCL_03     | DNA-repair protein complementing XP-G cells      | IP000477535                | 133,331.50                    | 99.80%                             | 2                         | 2                        | 2                       | 0.01%                       | 2.45%                        | LKTEKEPDATPPSR                  | K                   | T               | 95.00%                                  | 3.42                     | 0.446                  | 0                                | 0                                | 1                                | 0                                | 2                           | 1,745.85                           | 329                 | 343                | TRUE     |                |
| SNU216_PCL_03     | DNA-repair protein complementing XP-G cells      | IP000477535                | 133,331.50                    | 99.80%                             | 2                         | 2                        | 2                       | 0.01%                       |                              |                                 |                     |                 |                                         |                          |                        |                                  |                                  |                                  |                                  |                             |                                    |                     |                    |          |                |

Supplemental Table 2. A list of all phosphorylated peptides identified in SNU216 and SNU216-LR.

| MS/MS sample name | Protein name                                                               | Protein accession numbers  | Protein molecular weight (Da) | Protein identification probability | Number of unique peptides | Number of unique spectra | Number of total spectra | Percentage of total spectra | Percentage sequence coverage | Peptide sequence                 | Previous amino acid | Next amino acid | Best Peptide identification probability | Best SEQUEST XCorr score | Best SEQUEST Dcn score | Number of identified +1H spectra | Number of identified +2H spectra | Number of identified +3H spectra | Number of identified +4H spectra | Number of enzymatic termini | Calculate d +1H Peptide Mass (AMU) | Peptide start index | Peptide stop index | Assigned | Other Proteins |
|-------------------|----------------------------------------------------------------------------|----------------------------|-------------------------------|------------------------------------|---------------------------|--------------------------|-------------------------|-----------------------------|------------------------------|----------------------------------|---------------------|-----------------|-----------------------------------------|--------------------------|------------------------|----------------------------------|----------------------------------|----------------------------------|----------------------------------|-----------------------------|------------------------------------|---------------------|--------------------|----------|----------------|
| SNU216_PCL_03     | hypothetical protein LOC64423 isoform 2                                    | IP000644591                | 78,770.80                     | 100.00%                            | 4                         | 4                        | 5                       | 0.03%                       | 12.40%                       | DPTSLGLVLQAEADSTEGLEDVAHRS       | K                   | G               | 95.00%                                  | 5.91                     | 0.261                  | 0                                | 2                                | 0                                | 2                                | 2,877.32                    | 600                                | 626                 | TRUE               |          |                |
| SNU216_PCL_03     | hypothetical protein LOC64423 isoform 2                                    | IP000644591                | 78,770.80                     | 100.00%                            | 4                         | 4                        | 5                       | 0.03%                       | 12.40%                       | EHNSMWSLSSPDAAEVPDFSSIER         | R                   | L               | 95.00%                                  | 3.41                     | 0.397                  | 0                                | 0                                | 1                                | 0                                | 2                           | 2,971.25                           | 46                  | 71                 | TRUE     |                |
| SNU216_PCL_03     | hypothetical protein LOC64423 isoform 2                                    | IP000644591                | 78,770.80                     | 100.00%                            | 4                         | 4                        | 5                       | 0.03%                       | 12.40%                       | GARPPAAGPGGDEDEEDTAPESALDTSL     | R                   | S               | 95.00%                                  | 7.32                     | 0.55                   | 0                                | 0                                | 1                                | 0                                | 2                           | 3,292.37                           | 627                 | 658                | TRUE     |                |
| SNU216_PCL_03     | hypothetical protein LOC64423 isoform 2                                    | IP000644591                | 78,770.80                     | 100.00%                            | 4                         | 4                        | 5                       | 0.03%                       | 12.40%                       | QDAKDPDTSLLGLVQAEADSTEGLEDVAHS   | R                   | G               | 95.00%                                  | 5.74                     | 0.435                  | 0                                | 0                                | 0                                | 1                                | 2                           | 3,319.53                           | 596                 | 626                | TRUE     |                |
| SNU216_PCL_03     | Caskin-2                                                                   | IP00103516                 | 126,713.60                    | 100.00%                            | 3                         | 3                        | 3                       | 0.02%                       | 3.00%                        | GGSHSQEQAPQPSGGDPSPPQER          | R                   | N               | 95.00%                                  | 4.25                     | 0.447                  | 0                                | 0                                | 1                                | 0                                | 2                           | 2,507.06                           | 707                 | 730                | TRUE     |                |
| SNU216_PCL_03     | Caskin-2                                                                   | IP00103516                 | 126,713.60                    | 100.00%                            | 3                         | 3                        | 3                       | 0.02%                       | 3.00%                        | SPSQESIGAR                       | R                   | S               | 95.00%                                  | 1.95                     | 0.271                  | 0                                | 1                                | 0                                | 0                                | 2                           | 1,111.48                           | 695                 | 704                | TRUE     |                |
| SNU216_PCL_03     | Caskin-2                                                                   | IP00103516                 | 126,713.60                    | 100.00%                            | 3                         | 3                        | 3                       | 0.02%                       | 3.00%                        | SRGSGHSQEQAPQPSGGDPSPPQER        | R                   | N               | 95.00%                                  | 3.94                     | 0.264                  | 0                                | 0                                | 1                                | 0                                | 2                           | 2,750.19                           | 705                 | 730                | TRUE     |                |
| SNU216_PCL_03     | Anaphase-promoting complex subunit 1                                       | IP000033907                | 216,503.30                    | 100.00%                            | 3                         | 3                        | 3                       | 0.02%                       | 2.73%                        | AHSPALGVHSFGVQR                  | R                   | F               | 95.00%                                  | 3.34                     | 0.463                  | 0                                | 0                                | 1                                | 0                                | 2                           | 1,729.82                           | 353                 | 368                | TRUE     |                |
| SNU216_PCL_03     | Anaphase-promoting complex subunit 1                                       | IP000033907                | 216,503.30                    | 100.00%                            | 3                         | 3                        | 3                       | 0.02%                       | 2.73%                        | LLGSLDEVLLSPVPELRDSSK            | K                   | L               | 95.00%                                  | 3.53                     | 0.371                  | 0                                | 0                                | 1                                | 0                                | 2                           | 2,446.28                           | 544                 | 565                | TRUE     |                |
| SNU216_PCL_03     | Anaphase-promoting complex subunit 1                                       | IP000033907                | 216,503.30                    | 100.00%                            | 3                         | 3                        | 3                       | 0.02%                       | 2.73%                        | NDFEGSLSPVIAPK                   | R                   | K               | 95.00%                                  | 2.88                     | 0.322                  | 0                                | 1                                | 0                                | 0                                | 2                           | 1,700.79                           | 680                 | 694                | TRUE     |                |
| SNU216_PCL_03     | Isoform 2 of E1A-binding protein p400                                      | IP00064931,IP00167535,IP   | 339,689.90                    | 100.00%                            | 4                         | 4                        | 4                       | 0.02%                       | 2.94%                        | ALSPVTSR                         | K                   | T               | 95.00%                                  | 1.49                     | 0.325                  | 0                                | 1                                | 0                                | 0                                | 2                           | 910.4394                           | 697                 | 704                | TRUE     |                |
| SNU216_PCL_03     | Isoform 2 of E1A-binding protein p400                                      | IP00064931,IP00167535,IP   | 339,689.90                    | 100.00%                            | 4                         | 4                        | 4                       | 0.02%                       | 2.94%                        | KASISLTDDEVDDEETIEEAEANGVVDHQ    | R                   | E               | 95.00%                                  | 7.16                     | 0.0038                 | 0                                | 0                                | 0                                | 1                                | 2                           | 4,490.90                           | 902                 | 940                | TRUE     |                |
| SNU216_PCL_03     | Isoform 2 of E1A-binding protein p400                                      | IP00064931,IP00167535,IP   | 339,689.90                    | 100.00%                            | 4                         | 4                        | 4                       | 0.02%                       | 2.94%                        | RSPPKLLGNMPPFQK                  | K                   | N               | 95.00%                                  | 3.66                     | 0.444                  | 0                                | 0                                | 1                                | 0                                | 2                           | 1,903.00                           | 2438                | 2453               | TRUE     |                |
| SNU216_PCL_03     | Isoform 2 of E1A-binding protein p400                                      | IP00064931,IP00167535,IP   | 339,689.90                    | 100.00%                            | 4                         | 4                        | 4                       | 0.02%                       | 2.94%                        | VAVNALAVGEGPTASKPPIGGPTQEEK      | R                   | T               | 95.00%                                  | 4.83                     | 0.367                  | 0                                | 0                                | 1                                | 0                                | 2                           | 2,855.42                           | 1677                | 1705               | TRUE     |                |
| SNU216_PCL_03     | Isoform 2 of Solute carrier family 12 member 2                             | IP00022649,IP000220844     | 129,684.00                    | 100.00%                            | 2                         | 2                        | 2                       | 0.01%                       | 4.01%                        | KESKGPVPLNVADQK                  | H                   | L               | 95.00%                                  | 3.16                     | 0.384                  | 0                                | 0                                | 1                                | 0                                | 1                           | 1,802.94                           | 976                 | 991                | TRUE     |                |
| SNU216_PCL_03     | Isoform 2 of Solute carrier family 12 member 2                             | IP00022649,IP000220844     | 129,684.00                    | 100.00%                            | 2                         | 2                        | 2                       | 0.01%                       | 4.01%                        | LRLPSLAELHDELEKEPFEDGFANGEESTPTR | K                   | D               | 95.00%                                  | 4.62                     | 0.312                  | 0                                | 0                                | 1                                | 2                                | 3,706.73                    | 238                                | 269                 | TRUE               |          |                |
| SNU216_PCL_03     | RNA binding motif protein 15B                                              | IP00175136                 | 97,208.40                     | 100.00%                            | 3                         | 3                        | 3                       | 0.02%                       | 4.16%                        | ASGDPGASGMSPR                    | K                   | A               | 95.00%                                  | 2.26                     | 0.444                  | 0                                | 1                                | 0                                | 0                                | 2                           | 1,269.49                           | 99                  | 111                | TRUE     |                |
| SNU216_PCL_03     | RNA binding motif protein 15B                                              | IP00175136                 | 97,208.40                     | 100.00%                            | 3                         | 3                        | 3                       | 0.02%                       | 4.16%                        | DRTPPHLLYSOR                     | R                   | D               | 95.00%                                  | 3.15                     | 0.403                  | 0                                | 0                                | 1                                | 0                                | 2                           | 1,549.72                           | 530                 | 541                | TRUE     |                |
| SNU216_PCL_03     | RNA binding motif protein 15B                                              | IP00175136                 | 97,208.40                     | 100.00%                            | 3                         | 3                        | 3                       | 0.02%                       | 4.16%                        | FTLEGDWITSPSK                    | R                   | S               | 95.00%                                  | 2.77                     | 0.426                  | 0                                | 1                                | 0                                | 0                                | 2                           | 1,447.61                           | 544                 | 555                | TRUE     |                |
| SNU216_PCL_03     | Isoform 1 of Bromodomain adjacent to zinc finger IP000412415,IP000743026   | IP000412415,IP000743026    | 178,763.50                    | 100.00%                            | 7                         | 10                       | 11                      | 0.07%                       | 4.82%                        | DTEQKELDQDMVTEDEDDPGSHK          | K                   | R               | 95.00%                                  | 3.85                     | 0.527                  | 0                                | 0                                | 1                                | 0                                | 2                           | 2,741.08                           | 720                 | 742                | TRUE     |                |
| SNU216_PCL_03     | Isoform 1 of Bromodomain adjacent to zinc finger IP000412415,IP000743026   | IP000412415,IP000743026    | 178,763.50                    | 100.00%                            | 7                         | 10                       | 11                      | 0.07%                       | 4.82%                        | DTEQKELDQDMVTEDEDDPGSHKR         | K                   | G               | 95.00%                                  | 5.36                     | 0.428                  | 0                                | 1                                | 1                                | 2                                | 2,897.18                    | 720                                | 743                 | TRUE               |          |                |
| SNU216_PCL_03     | Isoform 1 of Bromodomain adjacent to zinc finger IP000412415,IP000743026   | IP000412415,IP000743026    | 178,763.50                    | 100.00%                            | 7                         | 10                       | 11                      | 0.07%                       | 4.82%                        | LDLQDMVTEDEDDPGSHKR              | K                   | G               | 95.00%                                  | 4.05                     | 0.41                   | 0                                | 1                                | 2                                | 2,295.91                         | 725                         | 743                                | TRUE                |                    |          |                |
| SNU216_PCL_03     | Isoform 1 of Bromodomain adjacent to zinc finger IP000412415,IP000743026   | IP000412415,IP000743026    | 178,763.50                    | 100.00%                            | 7                         | 10                       | 11                      | 0.07%                       | 4.82%                        | ELPTADEEEALQEHQR                 | R                   | K               | 95.00%                                  | 2.85                     | 0.183                  | 0                                | 0                                | 1                                | 0                                | 2                           | 2,102.94                           | 769                 | 785                | TRUE     |                |
| SNU216_PCL_03     | Isoform 1 of Bromodomain adjacent to zinc finger IP000412415,IP000743026   | IP000412415,IP000743026    | 178,763.50                    | 100.00%                            | 7                         | 10                       | 11                      | 0.07%                       | 4.82%                        | KRQSPSPVTLGR                     | R                   | R               | 95.00%                                  | 3.37                     | 0.225                  | 0                                | 0                                | 1                                | 0                                | 2                           | 1,631.83                           | 1411                | 1424               | TRUE     |                |
| SNU216_PCL_03     | Isoform 1 of Bromodomain adjacent to zinc finger IP000412415,IP000743026   | IP000412415,IP000743026    | 178,763.50                    | 100.00%                            | 7                         | 10                       | 11                      | 0.07%                       | 4.82%                        | LGHVTPSNVQVSTPPAAK               | K                   | K               | 95.00%                                  | 3.65                     | 0.408                  | 0                                | 0                                | 1                                | 0                                | 2                           | 2,111.05                           | 1534                | 1553               | TRUE     |                |
| SNU216_PCL_03     | Isoform 1 of Bromodomain adjacent to zinc finger IP000412415,IP000743026   | IP000412415,IP000743026    | 178,763.50                    | 100.00%                            | 7                         | 10                       | 11                      | 0.07%                       | 4.82%                        | KRQSPSPVTLGR                     | K                   | R               | 95.00%                                  | 2.74                     | 0.392                  | 0                                | 0                                | 1                                | 0                                | 2                           | 1,503.73                           | 1412                | 1424               | TRUE     |                |
| SNU216_PCL_03     | Transmembrane 9 superfamily protein member 4 IP000021985                   | IP000021985                | 72,543.60                     | 100.00%                            | 1                         | 1                        | 1                       | 0.01%                       | 1.92%                        | KEKDVQFEHGYR                     | K                   | L               | 94.70%                                  | 2.25                     | 0.206                  | 0                                | 1                                | 0                                | 0                                | 2                           | 1,615.73                           | 140                 | 151                | TRUE     |                |
| SNU216_PCL_03     | chromodomain helicase DNA binding protein 7 IP000472901                    | IP000472901                | 335,929.80                    | 100.00%                            | 3                         | 3                        | 3                       | 0.02%                       | 3.00%                        | GSEEDDEEKLEDDDKSESSOPEAGAVSR     | K                   | G               | 95.00%                                  | 5.14                     | 0.165                  | 0                                | 0                                | 0                                | 2                                | 3,261.31                    | 2236                               | 2264                | TRUE               |          |                |
| SNU216_PCL_03     | chromodomain helicase DNA binding protein 7 IP000472901                    | IP000472901                | 335,929.80                    | 100.00%                            | 3                         | 3                        | 3                       | 0.02%                       | 3.00%                        | TPFKDEIDFANSPSEKESMEIHATGK       | R                   | H               | 95.00%                                  | 4.07                     | 0.214                  | 0                                | 0                                | 0                                | 1                                | 2                           | 3,361.45                           | 1862                | 1890               | TRUE     |                |
| SNU216_PCL_03     | chromodomain helicase DNA binding protein 7 IP000472901                    | IP000472901                | 335,929.80                    | 100.00%                            | 3                         | 3                        | 3                       | 0.02%                       | 3.00%                        | VPVHQHSPSEFLKPPVDMTQVSGPNAQ      | K                   | S               | 95.00%                                  | 4.8                      | 0.382                  | 0                                | 0                                | 1                                | 2                                | 3,572.76                    | 551                                | 582                 | TRUE               |          |                |
| SNU216_PCL_03     | Isoform 1 of AF4/FMR2 family member 4 IP00004344,IP000383219               | IP00004344,IP000383219     | 98,206.30                     | 99.00%                             | 2                         | 2                        | 3                       | 0.02%                       | 2.41%                        | SSSPGKQAVSSLSNLSHSR              | R                   | S               | 95.00%                                  | 4.98                     | 0.512                  | 0                                | 0                                | 2                                | 0                                | 2                           | 1,992.91                           | 178                 | 196                | TRUE     |                |
| SNU216_PCL_03     | Isoform 1 of AF4/FMR2 family member 4 IP00004344,IP000383219               | IP00004344,IP000383219     | 98,206.30                     | 99.00%                             | 2                         | 2                        | 3                       | 0.02%                       | 2.41%                        | TSQSSSLK                         | R                   | S               | 89.90%                                  | 1.42                     | 0.196                  | 1                                | 0                                | 0                                | 0                                | 2                           | 1,030.48                           | 834                 | 842                | TRUE     |                |
| SNU216_PCL_03     | Isoform 1 of Pogo transposable element with ZNF IP000410717,IP000410718,IP | IP000410717,IP000410718,IP | 151,210.70                    | 99.80%                             | 1                         | 2                        | 2                       | 0.01%                       | 1.35%                        | SLDSEVPSPSAKPPSPPEK              | K                   | T               | 95.00%                                  | 3.68                     | 0.474                  | 0                                | 1                                | 1                                | 0                                | 2                           | 2,002.94                           | 357                 | 375                | TRUE     |                |
| SNU216_PCL_03     | RACK7 isoform e IP000216540,IP000418316,IP                                 | IP000216540,IP000418316,IP | 137,037.30                    | 100.00%                            | 7                         | 7                        | 7                       | 0.04%                       | 6.73%                        | DKASPEKDFSEK                     | K                   | A               | 95.00%                                  | 2.88                     | 0.249                  | 0                                | 1                                | 0                                | 0                                | 2                           | 1,686.73                           | 684                 | 697                | TRUE     |                |
| SNU216_PCL_03     | RACK7 isoform e IP000216540,IP000418316,IP                                 | IP000216540,IP000418316,IP | 137,037.30                    | 100.00%                            | 7                         | 7                        | 7                       | 0.04%                       | 6.73%                        | ELSESQQQSTPVLPSLSPK              | K                   | R               | 95.00%                                  | 3.02                     | 0.421                  | 0                                | 1                                | 0                                | 0                                | 2                           | 2,147.06                           | 550                 | 568                | TRUE     |                |
| SNU216_PCL_03     | RACK7 isoform e IP000216540,IP000418316,IP                                 | IP000216540,IP000418316,IP | 137,037.30                    | 100.00%                            | 7                         | 7                        | 7                       | 0.04%                       | 6.73%                        | ELSESQQQSTPVLPSLSPKR             | K                   | Q               | 95.00%                                  | 3.61                     | 0.435                  | 0                                | 0                                | 1                                | 0                                | 2                           | 2,303.16                           | 550                 | 569                | TRUE     |                |
| SNU216_PCL_03     | RACK7 isoform e IP000216540,IP000418316,IP                                 | IP000216540,IP000418316,IP | 137,037.30                    | 100.00%                            | 7                         | 7                        | 7                       | 0.04%                       | 6.73%                        | SPMSTNSSVHTGSDVEQDAEK            | R                   | K               | 95.00%                                  | 3.21                     | 0.19                   | 0                                | 0                                | 1                                | 0                                | 2                           | 2,285.92                           | 451                 | 471                | TRUE     |                |
| SNU216_PCL_03     | RACK7 isoform e IP000216540,IP000418316,IP                                 | IP000216540,IP000418316,IP | 137,037.30                    | 100.00%                            | 7                         | 7                        | 7                       | 0.04%                       | 6.73%                        | SPMSTNSSVHTGSDVEQDAEKK           | R                   | A               | 85.20%                                  | 3.8                      | 0.0838                 | 0                                | 0                                | 1                                | 0                                | 2                           | 2,414.02                           | 451                 | 472                | TRUE     |                |
| SNU216_PCL_03     | RACK7 isoform e IP000216540,IP000418316,IP                                 | IP000216540,IP000418316,IP | 137,037.30                    | 100.00%                            | 7                         | 7                        | 7                       | 0.04%                       | 6.73%                        | STSPASEKADPAVAK                  | K                   | D               | 95.00%                                  | 2.28                     | 0.291                  | 0                                | 0                                | 1                                | 0                                | 2                           | 1,604.66                           | 669                 | 683                | TRUE     |                |
| SNU216_PCL_03     | RACK7 isoform e IP000216540,IP000418316,IP                                 | IP000216540,IP000418316,IP | 137,037.30                    | 100.00%                            | 7                         | 7                        | 7                       | 0.04%                       | 6.73%                        | VKLNFMDTASPK                     | K                   | I               | 93.10%                                  | 2.62                     | 0.132                  | 0                                | 1                                | 0                                | 0                                | 2                           | 1,430.68                           | 416                 | 427                | TRUE     |                |
| SNU216_PCL_03     | Vigilin IP00022228                                                         | IP00022228                 | 141,442.20                    | 100.00%                            | 2                         | 2                        | 3                       | 0.02%                       | 1.97%                        | VATLNSEESDPPTYK                  | K                   | D               | 95.00%                                  | 4.16                     | 0.534                  | 0                                | 2                                | 0                                | 0                                | 2                           | 1,859.79                           | 26                  | 41                 | TRUE     |                |
| SNU216_PCL_03     | Vigilin IP00022228                                                         | IP00022228                 | 141,442.20                    | 100.00%                            | 2                         | 2                        | 3                       | 0.02%                       | 1.97%                        | VATLNSEESDPPTYKDAFFPLPEK         | K                   | A               | 95.00%                                  | 3.19                     | 0.256                  | 0                                | 0                                | 1                                | 0                                | 2                           | 2,854.31                           | 26                  | 50                 | TRUE     |                |
| SNU216_PCL_03     | Brefeldin A-inhibited guanine nucleotide-exchange IP00002186               | IP00002186                 | 202,096.90                    | 100.00%                            | 7                         | 9                        | 9                       | 0.06%                       | 5.60%                        | ERGSLSLGTDDGAGQEVVKDILEDVV TSAIK | R                   | E               | 95.00%                                  | 6.93                     | 0.604                  | 0                                | 0                                | 1                                | 1                                | 2                           | 3,198.54                           | 273                 | 302                | TRUE     |                |
| SNU216_PCL_03     | Brefeldin A-inhibited guanine nucleotide-exchange IP00002186               | IP00002186                 | 202,096.90                    | 100.00%                            | 7                         | 9                        | 9                       | 0.06%                       | 5.60%                        | GQSQLSNPTDSDWK                   | R                   | G               | 95.00%                                  | 2.13                     | 0.28                   | 0                                | 1                                | 0                                | 0                                | 2                           | 1,722.64                           | 1523                | 1536               | TRUE     |                |
| SNU216_PCL_03     | Brefeldin A-inhibited guanine nucleotide-exchange IP00002186               | IP00002186                 | 202,096.90                    | 100.00%                            | 7                         | 9                        | 9                       | 0.06%                       | 5.60%                        | GSSLSGTTDGDGAQEVVK               | R                   | D               | 95.00%                                  | 2.97                     | 0.456                  | 0                                | 0                                | 1                                | 0                                | 2                           | 1,629.70                           | 275                 | 290                | TRUE     |                |
| SNU216_PCL_03     | Brefeldin A-inhibited guanine nucleotide-exchange IP00002186               | IP00002186                 | 202,096.90                    | 100.00%                            | 7                         | 9                        | 9                       | 0.06%                       | 5.60%                        | GSSLSGTTDGDGAQEVVKDILEDVV TSAIK  | R                   | E               | 95.00%                                  | 6.18                     | 0.585                  | 0                                | 0                                | 1                                | 1                                | 2                           | 2,913.40                           | 275                 | 302                | TRUE     |                |
| SNU216_PCL_03     | Brefeldin A-inhibited guanine nucleotide-exchange IP00002186               | IP00002186                 | 202,096.90                    | 100.00%                            | 7                         | 9                        | 9                       | 0.06%                       | 5.60%                        | HLDVDLDRQLSSLDKPNFSER            | K                   | G               | 95.00%                                  | 2.62                     | 0.232                  | 0                                | 0                                | 1                                | 2                                | 2,504.18                    | 1502                               | 1522                | TRUE               |          |                |
| SNU216_PCL_03     | Brefeldin A-inhibited guanine nucleotide-exchange IP00002186               | IP00002186                 | 202,096.90                    | 100.00%                            | 7                         | 9                        | 9                       | 0.06%                       | 5.60%                        | PQSPVIQAAAVSPK                   | K                   | F               | 95.00%                                  | 2.62                     | 0.208                  | 0                                | 1                                | 0                                | 0                                | 2                           | 1,472.75                           | 216                 | 229                | TRUE     |                |
| SNU216_PCL_03     | Brefeldin A-inhibited guanine nucleotide-exchange IP00002186               | IP00002186                 | 202,096.90                    | 100.00%                            | 7                         | 9                        | 9                       | 0.06%                       | 5.60%                        |                                  |                     |                 |                                         |                          |                        |                                  |                                  |                                  |                                  |                             |                                    |                     |                    |          |                |

Supplemental Table 2. A list of all phosphorylated peptides identified in SNU216 and SNU216-LR.

| MS/MS sample name | Protein name                                         | Protein accession numbers | Protein molecular weight (Da) | Protein identification probability | Number of unique peptides | Number of unique spectra | Number of total spectra | Percentage of total spectra | Percentage sequence coverage | Peptide sequence                | Previous amino acid | Next amino acid | Best Peptide identification probability | Best SEQUEST XCorr score | Best SEQUEST DcN score | Number of identified +1H spectra | Number of identified +2H spectra | Number of identified +3H spectra | Number of identified +4H spectra | Number of enzymatic termini | Calculate d +1H Peptide Mass (AMU) | Peptide start index | Peptide stop index | Assigned | Other Proteins |
|-------------------|------------------------------------------------------|---------------------------|-------------------------------|------------------------------------|---------------------------|--------------------------|-------------------------|-----------------------------|------------------------------|---------------------------------|---------------------|-----------------|-----------------------------------------|--------------------------|------------------------|----------------------------------|----------------------------------|----------------------------------|----------------------------------|-----------------------------|------------------------------------|---------------------|--------------------|----------|----------------|
| SNU216_PCL_03     | nucleolar protein 5A                                 | IP00719818                | 66,052.00                     | 99.80%                             | 3                         | 3                        | 3                       | 0.02%                       | 6.23%                        | SFSKEELMSDLEETAGSTSIPIK         | K                   | R               | 95.00%                                  | 4.34                     | 0                      | 0                                | 2                                | 0                                | 0                                | 2                           | 2,553.13                           | 511                 | 533                | TRUE     |                |
| SNU216_PCL_03     | SWI/SNF-related matrix-associated actin-depende      | IP00297211                | 121,910.80                    | 100.00%                            | 3                         | 4                        | 4                       | 0.02%                       | 4.66%                        | EALRVSEPKAPK                    | R                   | A               | 94.30%                                  | 2.05                     | 0.21                   | 0                                | 0                                | 1                                | 0                                | 2                           | 1,404.72                           | 750                 | 761                | TRUE     |                |
| SNU216_PCL_03     | SWI/SNF-related matrix-associated actin-depende      | IP00297211                | 121,910.80                    | 100.00%                            | 3                         | 4                        | 4                       | 0.02%                       | 4.66%                        | GGPEGVAAQAVASASAGPADAEMEIEFDI   | K                   | Q               | 95.00%                                  | 5.79                     | 0.472                  | 0                                | 0                                | 1                                | 0                                | 2                           | 3,369.45                           | 35                  | 69                 | TRUE     |                |
| SNU216_PCL_03     | SWI/SNF-related matrix-associated actin-depende      | IP00297211                | 121,910.80                    | 100.00%                            | 3                         | 4                        | 4                       | 0.02%                       | 4.66%                        | GGPEGVAAQAVASASAGPADAEMEIEFDI   | K                   | E               | 95.00%                                  | 7.16                     | 0.629                  | 0                                | 0                                | 1                                | 1                                | 2                           | 3,609.61                           | 35                  | 71                 | TRUE     |                |
| SNU216_PCL_03     | Isoform 1 of Zinc finger protein HRX                 | IP00009286                | 431,750.30                    | 100.00%                            | 10                        | 11                       | 11                      | 0.07%                       | 5.11%                        | AQGQESDSETSVSR                  | K                   | G               | 95.00%                                  | 2.41                     | 0.389                  | 0                                | 1                                | 0                                | 0                                | 2                           | 1,560.62                           | 1051                | 1064               | TRUE     |                |
| SNU216_PCL_03     | Isoform 1 of Zinc finger protein HRX                 | IP00009286                | 431,750.30                    | 100.00%                            | 10                        | 11                       | 11                      | 0.07%                       | 5.11%                        | GPGEPODPTPLHPPTPIILSTDR         | K                   | S               | 95.00%                                  | 3.38                     | 0.334                  | 0                                | 0                                | 1                                | 0                                | 2                           | 2,458.17                           | 1831                | 1853               | TRUE     |                |
| SNU216_PCL_03     | Isoform 1 of Zinc finger protein HRX                 | IP00009286                | 431,750.30                    | 100.00%                            | 10                        | 11                       | 11                      | 0.07%                       | 5.11%                        | NDRDQHTDSTQSANSSPEDTEVK         | R                   | T               | 95.00%                                  | 4.83                     | 0.16                   | 0                                | 0                                | 1                                | 0                                | 2                           | 2,836.06                           | 2377                | 2400               | TRUE     |                |
| SNU216_PCL_03     | Isoform 1 of Zinc finger protein HRX                 | IP00009286                | 431,750.30                    | 100.00%                            | 10                        | 11                       | 11                      | 0.07%                       | 5.11%                        | QAAKPDNLNPETEEISIPRSSPEGPDPVLT  | R                   | Q               | 95.00%                                  | 3.79                     | 0.194                  | 0                                | 0                                | 0                                | 1                                | 2                           | 3,778.81                           | 1665                | 1699               | TRUE     |                |
| SNU216_PCL_03     | Isoform 1 of Zinc finger protein HRX                 | IP00009286                | 431,750.30                    | 100.00%                            | 10                        | 11                       | 11                      | 0.07%                       | 5.11%                        | SASPSVPGTPIKPKK                 | R                   | T               | 95.00%                                  | 3.61                     | 0.397                  | 0                                | 1                                | 1                                | 0                                | 2                           | 1,557.80                           | 3525                | 3539               | TRUE     |                |
| SNU216_PCL_03     | Isoform 1 of Zinc finger protein HRX                 | IP00009286                | 431,750.30                    | 100.00%                            | 10                        | 11                       | 11                      | 0.07%                       | 5.11%                        | SDTPEVHPPLPISQSPENESNDRR        | R                   | S               | 95.00%                                  | 2.82                     | 0.179                  | 0                                | 0                                | 0                                | 1                                | 2                           | 2,781.25                           | 504                 | 527                | TRUE     |                |
| SNU216_PCL_03     | Isoform 1 of Zinc finger protein HRX                 | IP00009286                | 431,750.30                    | 100.00%                            | 10                        | 11                       | 11                      | 0.07%                       | 5.11%                        | SEPRSPSHSMR                     | R                   | T               | 93.30%                                  | 2.06                     | 0.262                  | 0                                | 0                                | 1                                | 0                                | 2                           | 1,350.56                           | 746                 | 756                | TRUE     |                |
| SNU216_PCL_03     | Isoform 1 of Zinc finger protein HRX                 | IP00009286                | 431,750.30                    | 100.00%                            | 10                        | 11                       | 11                      | 0.07%                       | 5.11%                        | REDSPELNPPPGIEDNR               | R                   | Q               | 95.00%                                  | 3.05                     | 0.378                  | 0                                | 1                                | 0                                | 0                                | 2                           | 2,101.92                           | 1854                | 1871               | TRUE     |                |
| SNU216_PCL_03     | Isoform 1 of Zinc finger protein HRX                 | IP00009286                | 431,750.30                    | 100.00%                            | 10                        | 11                       | 11                      | 0.07%                       | 5.11%                        | SSAGSEDAEPLAPKPKPVTR            | K                   | N               | 95.00%                                  | 2.94                     | 0.282                  | 0                                | 0                                | 1                                | 0                                | 2                           | 2,553.33                           | 1114                | 1137               | TRUE     |                |
| SNU216_PCL_03     | Isoform 1 of Zinc finger protein HRX                 | IP00009286                | 431,750.30                    | 100.00%                            | 10                        | 11                       | 11                      | 0.07%                       | 5.11%                        | TIHSPSTSTSESSK                  | R                   | E               | 95.00%                                  | 3.51                     | 0.201                  | 0                                | 1                                | 0                                | 0                                | 2                           | 1,659.73                           | 2094                | 2108               | TRUE     |                |
| SNU216_PCL_03     | Hypothetical protein FLJ22321                        | IP00012199                | 40,236.10                     | 99.80%                             | 2                         | 2                        | 2                       | 0.01%                       | 11.10%                       | ALVEFESNPETPEERPGSPVSQR         | R                   | A               | 95.00%                                  | 3.04                     | 0.201                  | 0                                | 0                                | 1                                | 0                                | 2                           | 2,635.20                           | 31                  | 53                 | TRUE     |                |
| SNU216_PCL_03     | Hypothetical protein FLJ22321                        | IP00012199                | 40,236.10                     | 99.80%                             | 2                         | 2                        | 2                       | 0.01%                       | 11.10%                       | LGLRPESPELSITSVSR               | R                   | T               | 95.00%                                  | 3.02                     | 0.228                  | 0                                | 0                                | 1                                | 0                                | 2                           | 1,864.92                           | 11                  | 27                 | TRUE     |                |
| SNU216_PCL_03     | Isoform 1 of Transcription factor 20                 | IP00159322,IP00220381     | 209,651.90                    | 100.00%                            | 3                         | 3                        | 4                       | 0.02%                       | 2.86%                        | AGSSPAQGAQNEPPR                 | K                   | L               | 95.00%                                  | 2.99                     | 0.566                  | 0                                | 2                                | 0                                | 0                                | 2                           | 1,546.66                           | 556                 | 570                | TRUE     |                |
| SNU216_PCL_03     | Isoform 1 of Transcription factor 20                 | IP00159322,IP00220381     | 209,651.90                    | 100.00%                            | 3                         | 3                        | 4                       | 0.02%                       | 2.86%                        | GNASPGGAATHDSLDSPGQDSRPTPMR     | R                   | R               | 84.30%                                  | 2.95                     | 0.174                  | 0                                | 0                                | 1                                | 0                                | 2                           | 2,865.23                           | 963                 | 989                | TRUE     |                |
| SNU216_PCL_03     | Isoform 1 of Transcription factor 20                 | IP00159322,IP00220381     | 209,651.90                    | 100.00%                            | 3                         | 3                        | 4                       | 0.02%                       | 2.86%                        | QLSGQSTSDTYTK                   | R                   | G               | 95.00%                                  | 3.27                     | 0.535                  | 0                                | 0                                | 1                                | 0                                | 2                           | 1,582.66                           | 536                 | 549                | TRUE     |                |
| SNU216_PCL_03     | 251 kDa protein                                      | IP00177743                | 251,116.00                    | 100.00%                            | 3                         | 4                        | 4                       | 0.02%                       | 2.33%                        | LGSPPVDNLEDMDRDOLDTDSVFTR       | R                   | S               | 95.00%                                  | 2.99                     | 0.213                  | 0                                | 0                                | 0                                | 2                                | 2,805.19                    | 171                                | 194                 | TRUE               |          |                |
| SNU216_PCL_03     | 251 kDa protein                                      | IP00177743                | 251,116.00                    | 100.00%                            | 3                         | 4                        | 4                       | 0.02%                       | 2.33%                        | RSSPPPPSGSSSR                   | R                   | T               | 95.00%                                  | 2.25                     | 0.453                  | 0                                | 0                                | 1                                | 0                                | 2                           | 1,475.66                           | 38                  | 51                 | TRUE     |                |
| SNU216_PCL_03     | 251 kDa protein                                      | IP00177743                | 251,116.00                    | 100.00%                            | 3                         | 4                        | 4                       | 0.02%                       | 2.33%                        | TKSPKPAESQCATK                  | R                   | Q               | 95.00%                                  | 2.99                     | 0.282                  | 0                                | 0                                | 1                                | 0                                | 2                           | 1,636.79                           | 1035                | 1049               | TRUE     |                |
| SNU216_PCL_03     | Tyrosine-protein phosphatase non-receptor type       | IP00018914                | 135,239.40                    | 100.00%                            | 3                         | 3                        | 3                       | 0.02%                       | 5.05%                        | NLNINITHAYNQPEDLVVSQPEMR        | R                   | E               | 95.00%                                  | 3.85                     | 0.307                  | 0                                | 0                                | 1                                | 0                                | 2                           | 2,939.34                           | 468                 | 491                | TRUE     |                |
| SNU216_PCL_03     | Tyrosine-protein phosphatase non-receptor type       | IP00018914                | 135,239.40                    | 100.00%                            | 3                         | 3                        | 3                       | 0.02%                       | 5.05%                        | RHSLVNMNSMVR                    | K                   | G               | 95.00%                                  | 3.17                     | 0.234                  | 0                                | 0                                | 1                                | 0                                | 2                           | 1,538.70                           | 640                 | 651                | TRUE     |                |
| SNU216_PCL_03     | Tyrosine-protein phosphatase non-receptor type       | IP00018914                | 135,239.40                    | 100.00%                            | 3                         | 3                        | 3                       | 0.02%                       | 5.05%                        | TDPVAVNGASGPSISPEDLTSVK         | R                   | E               | 95.00%                                  | 2.89                     | 0.258                  | 0                                | 0                                | 1                                | 0                                | 2                           | 2,432.16                           | 794                 | 817                | TRUE     |                |
| SNU216_PCL_03     | tight junction protein 3                             | IP00293451,IP00744036     | 104,829.50                    | 99.30%                             | 2                         | 2                        | 2                       | 0.01%                       | 3.47%                        | HAQRSPEASQDTSVPESPR             | R                   | L               | 85.50%                                  | 3.09                     | 0.131                  | 0                                | 0                                | 0                                | 1                                | 2                           | 2,238.92                           | 348                 | 366                | TRUE     |                |
| SNU216_PCL_03     | tight junction protein 3                             | IP00293451,IP00744036     | 104,829.50                    | 99.30%                             | 2                         | 2                        | 2                       | 0.01%                       | 3.47%                        | SESPVQADESQSPR                  | R                   | D               | 95.00%                                  | 2.76                     | 0.355                  | 0                                | 1                                | 0                                | 0                                | 2                           | 1,596.65                           | 878                 | 891                | TRUE     |                |
| SNU216_PCL_03     | hepatoma-derived growth factor-related protein       | IP00419322,IP00645387     | 74,730.70                     | 99.80%                             | 1                         | 1                        | 1                       | 0.01%                       | 1.79%                        | RKSEGFSDMR                      | R                   | K               | 95.00%                                  | 1.93                     | 0.278                  | 0                                | 0                                | 1                                | 0                                | 2                           | 1,292.55                           | 452                 | 461                | TRUE     |                |
| SNU216_PCL_03     | Akt substrate AS250                                  | IP00719759                | 210,746.50                    | 99.80%                             | 2                         | 2                        | 4                       | 0.02%                       | 1.07%                        | RSSPAELDKDDLQQTQGK              | R                   | C               | 95.00%                                  | 4.46                     | 0.508                  | 0                                | 0                                | 3                                | 0                                | 2                           | 2,296.08                           | 818                 | 837                | TRUE     |                |
| SNU216_PCL_03     | Akt substrate AS250                                  | IP00719759                | 210,746.50                    | 99.80%                             | 2                         | 2                        | 4                       | 0.02%                       | 1.07%                        | SSPAELDKDDLQQTQGK               | R                   | C               | 95.00%                                  | 4.65                     | 0.33                   | 0                                | 0                                | 1                                | 0                                | 2                           | 2,139.98                           | 819                 | 837                | TRUE     |                |
| SNU216_PCL_03     | Solute carrier family 23 member 2                    | IP00295774,IP00552917     | 70,340.40                     | 99.60%                             | 2                         | 2                        | 2                       | 0.01%                       | 5.54%                        | SLDGMEYSNLPFGMNNIKK             | K                   | Y               | 92.90%                                  | 3.85                     | 0.113                  | 0                                | 0                                | 0                                | 1                                | 2                           | 2,269.03                           | 594                 | 612                | TRUE     |                |
| SNU216_PCL_03     | Solute carrier family 23 member 2                    | IP00295774,IP00552917     | 70,340.40                     | 99.60%                             | 2                         | 2                        | 2                       | 0.01%                       | 5.54%                        | LSLAETLDSTGSLDPOCR              | K                   | S               | 95.00%                                  | 2.91                     | 0.164                  | 0                                | 1                                | 0                                | 0                                | 2                           | 1,856.83                           | 70                  | 86                 | TRUE     |                |
| SNU216_PCL_03     | activating transcription factor 7 interacting protei | IP00419693                | 136,392.90                    | 100.00%                            | 4                         | 4                        | 4                       | 0.02%                       | 3.54%                        | HEHPNPNPPVSPGK                  | R                   | T               | 95.00%                                  | 2.97                     | 0.342                  | 0                                | 0                                | 1                                | 0                                | 2                           | 1,472.67                           | 664                 | 676                | TRUE     |                |
| SNU216_PCL_03     | activating transcription factor 7 interacting protei | IP00419693                | 136,392.90                    | 100.00%                            | 4                         | 4                        | 4                       | 0.02%                       | 3.54%                        | MESFSGSPKQGESSESLPK             | K                   | E               | 95.00%                                  | 3.82                     | 0.359                  | 0                                | 0                                | 1                                | 0                                | 2                           | 2,121.90                           | 471                 | 489                | TRUE     |                |
| SNU216_PCL_03     | activating transcription factor 7 interacting protei | IP00419693                | 136,392.90                    | 100.00%                            | 4                         | 4                        | 4                       | 0.02%                       | 3.54%                        | RHEHPNPNPPVSPGK                 | K                   | T               | 95.00%                                  | 3.07                     | 0.281                  | 0                                | 0                                | 1                                | 0                                | 2                           | 1,628.77                           | 663                 | 676                | TRUE     |                |
| SNU216_PCL_03     | activating transcription factor 7 interacting protei | IP00419693                | 136,392.90                    | 100.00%                            | 4                         | 4                        | 4                       | 0.02%                       | 3.54%                        | SKSMDMDNVQSK                    | R                   | R               | 95.00%                                  | 3.12                     | 0.354                  | 0                                | 1                                | 0                                | 0                                | 2                           | 1,447.58                           | 557                 | 568                | TRUE     |                |
| SNU216_PCL_03     | Huntingtin                                           | IP00002335                | 347,859.30                    | 99.80%                             | 2                         | 3                        | 3                       | 0.02%                       | 0.54%                        | EKEPGEQASVPLSPK                 | K                   | K               | 95.00%                                  | 3.98                     | 0.505                  | 0                                | 1                                | 1                                | 0                                | 2                           | 1,675.79                           | 1189                | 1203               | TRUE     |                |
| SNU216_PCL_03     | Huntingtin                                           | IP00002335                | 347,859.30                    | 99.80%                             | 2                         | 3                        | 3                       | 0.02%                       | 0.54%                        | GKEKEPGEQASVPLSPK               | K                   | K               | 95.00%                                  | 4.43                     | 0.455                  | 0                                | 0                                | 1                                | 0                                | 2                           | 1,860.91                           | 1187                | 1203               | TRUE     |                |
| SNU216_PCL_03     | Isoform A of Myotubularin-related protein 3          | IP00171273,IP00171274,IP  | 130,560.20                    | 99.80%                             | 2                         | 2                        | 2                       | 0.01%                       | 4.10%                        | RKTPFEASAILGHQDFELGDAALR        | R                   | S               | 95.00%                                  | 5.28                     | 0.349                  | 0                                | 0                                | 1                                | 2                                | 2,525.25                    | 729                                | 751                 | TRUE               |          |                |
| SNU216_PCL_03     | Isoform A of Myotubularin-related protein 3          | IP00171273,IP00171274,IP  | 130,560.20                    | 99.80%                             | 2                         | 2                        | 2                       | 0.01%                       | 4.10%                        | SLESLAGSGDFPLSADSLGKPTR         | R                   | V               | 95.00%                                  | 4.57                     | 0.493                  | 0                                | 0                                | 1                                | 0                                | 2                           | 2,577.24                           | 647                 | 671                | TRUE     |                |
| SNU216_PCL_03     | NOL1 protein                                         | IP00654555                | 92,976.00                     | 100.00%                            | 4                         | 4                        | 4                       | 0.02%                       | 7.68%                        | EAAAGIQWSEETDEEEKEVTPESGPPK     | R                   | V               | 95.00%                                  | 4.23                     | 0.395                  | 0                                | 0                                | 1                                | 0                                | 2                           | 3,490.40                           | 206                 | 235                | TRUE     |                |
| SNU216_PCL_03     | NOL1 protein                                         | IP00654555                | 92,976.00                     | 100.00%                            | 4                         | 4                        | 4                       | 0.02%                       | 7.68%                        | GTDTQTPAVLVSPSK                 | K                   | T               | 95.00%                                  | 2.66                     | 0.384                  | 0                                | 1                                | 0                                | 0                                | 2                           | 1,481.69                           | 756                 | 769                | TRUE     |                |
| SNU216_PCL_03     | NOL1 protein                                         | IP00654555                | 92,976.00                     | 100.00%                            | 4                         | 4                        | 4                       | 0.02%                       | 7.68%                        | GTDTQTPAVLVSPSKTQATLKPK         | K                   | D               | 95.00%                                  | 3.49                     | 0.208                  | 0                                | 0                                | 1                                | 0                                | 2                           | 2,349.21                           | 756                 | 777                | TRUE     |                |
| SNU216_PCL_03     | NOL1 protein                                         | IP00654555                | 92,976.00                     | 100.00%                            | 4                         | 4                        | 4                       | 0.02%                       | 7.68%                        | TNKSPEAKPLPGK                   | K                   | L               | 95.00%                                  | 3.5                      | 0.395                  | 0                                | 0                                | 1                                | 0                                | 2                           | 1,446.74                           | 64                  | 76                 | TRUE     |                |
| SNU216_PCL_03     | Isoform 2 of Nucleophosmin                           | IP00220740                | 29,464.90                     | 100.00%                            | 3                         | 5                        | 6                       | 0.04%                       | 13.20%                       | DELHIVEAEAMNVEGSPISK            | K                   | V               | 95.00%                                  | 3.36                     | 0.311                  | 0                                | 0                                | 1                                | 0                                | 2                           | 2,224.98                           | 55                  | 73                 | TRUE     |                |
| SNU216_PCL_03     | Isoform 2 of Nucleophosmin                           | IP00220740                | 29,464.90                     | 100.00%                            | 3                         | 5                        | 6                       | 0.04%                       | 13.20%                       | DELHIVEAEAMNVEGSPIKVLTATLK      | K                   | M               | 95.00%                                  | 6.25                     | 0.595                  | 0                                | 0                                | 1                                | 2                                | 2,951.45                    | 55                                 | 80                  | TRUE               |          |                |
| SNU216_PCL_03     | Isoform 2 of Nucleophosmin                           | IP00220740                | 29,464.90                     | 100.00%                            | 3                         | 5                        | 6                       | 0.04%                       | 13.20%                       | TVSLGAGAKDELHIVEAEAMNVEGSPIKVTL | R                   | M               | 95.00%                                  | 7.3                      | 0.571                  | 0                                | 1                                | 2                                | 2                                | 3,735.89                    | 46                                 | 80                  | TRUE               |          |                |
| SNU216_PCL_03     | Grb10 interacting GYF protein 2                      | IP00169434                | 150,270.50                    | 100.00%                            | 3                         | 5                        | 5                       | 0.03%                       | 4.15%                        | ALLSGGSITSPPLSPALPK             | R                   | Y               | 93.50%                                  | 3.34                     | 0.0575                 | 0                                | 1                                | 0                                | 0                                | 2                           | 1,859.95                           | 17                  | 35                 | TRUE     |                |
| SNU216_PCL_03     | Grb10 interacting GYF protein 2                      | IP00169434                | 150,270.50                    | 100.00%                            | 3                         | 5                        | 5                       | 0.03%                       | 4.15%                        | PGTPSDHQEQASQFER                | K                   | K               | 95.00%                                  | 3.92                     | 0.541                  | 0                                | 0                                | 1                                | 0                                | 2                           | 1,980.81                           | 380                 | 396                | TRUE     |                |
| SNU216_PCL_03     | Grb10 interacting GYF protein 2                      | IP00169434                | 150,270.50                    | 100.00%                            | 3                         | 5                        | 5                       | 0.03%                       | 4.15%                        | VGVSEASETPQTSSSSARPGTPSDHQSQEA  | R                   | K               | 90.40%                                  | 6.77                     | 0.0045                 | 0                                | 1                                | 1                                | 2                                | 3,783.64                    | 362                                | 396                 | TRUE               |          |                |
| SNU216_PCL_03     | hypothetical protein LOC25962 isoform 1              | IP00036742                | 202,029.90                    | 100.00%                            | 3                         | 4                        | 4                       | 0.02%                       | 2.10%                        | SFLSEPPSPGR                     | R                   | T               | 95.00%                                  | 2.66                     | 0.518                  | 0                                | 1                                | 0                                | 0                                | 2                           | 1,243.54                           | 1572                | 1582               | TRUE     |                |
| SNU216_PCL_03     | hypothetical protein LOC25962 isoform 1              | IP00036742                | 202,029.90                    | 100.00%                            | 3                         | 4                        | 4                       | 0.02%                       | 2.10%                        | VISHDRDSDPPPPPPPPPPQPPQPSLK     | R                   | R               | 95.00%                                  | 6.7                      | 0.433                  | 0                                |                                  |                                  |                                  |                             |                                    |                     |                    |          |                |

Supplemental Table 2. A list of all phosphorylated peptides identified in SNU216 and SNU216-LR.

| MS/MS sample name | Protein name                                                            | Protein accession numbers | Protein molecular weight (Da) | Protein identification probability | Number of unique peptides | Number of unique spectra | Number of total spectra | Percentage of total spectra | Percentage sequence coverage | Peptide sequence                 | Previous amino acid | Next amino acid | Best Peptide identification probability | Best SEQUEST XCorr score | Best SEQUEST Dcn score | Number of identified +1H spectra | Number of identified +2H spectra | Number of identified +3H spectra | Number of identified +4H spectra | Number of enzymatic termini | Calculate d +1H Peptide Mass (AMU) | Peptide start index | Peptide stop index | Assigned | Other Proteins |
|-------------------|-------------------------------------------------------------------------|---------------------------|-------------------------------|------------------------------------|---------------------------|--------------------------|-------------------------|-----------------------------|------------------------------|----------------------------------|---------------------|-----------------|-----------------------------------------|--------------------------|------------------------|----------------------------------|----------------------------------|----------------------------------|----------------------------------|-----------------------------|------------------------------------|---------------------|--------------------|----------|----------------|
| SNU216_PCL_03     | Src substrate cortactin                                                 | IP00029601,IP00062884,IP  | 57,466.00                     | 100.00%                            | 3                         | 4                        | 6                       | 0.04%                       | 5.81%                        | TQTTPVSPAPQOTEER                 | K                   | L               | 95.00%                                  | 3.16                     | 0.436                  | 0                                | 2                                | 0                                | 0                                | 2                           | 1,814.83                           | 362                 | 377                | TRUE     |                |
| SNU216_PCL_03     | Isoform 1 of Autophagy-related protein 9A                               | IP000383396               | 94,467.50                     | 100.00%                            | 3                         | 3                        | 4                       | 0.02%                       | 7.63%                        | HPEVPVPEEGSEDELLPQVHKV           | R                   | -               | 95.00%                                  | 3.88                     | 0.244                  | 0                                | 0                                | 2                                | 0                                | 2                           | 2,429.10                           | 819                 | 839                | TRUE     |                |
| SNU216_PCL_03     | Isoform 1 of Autophagy-related protein 9A                               | IP000383396               | 94,467.50                     | 100.00%                            | 3                         | 3                        | 4                       | 0.02%                       | 7.63%                        | LEASYSDDSPGEEDLLVHVAEGSK         | R                   | S               | 95.00%                                  | 2.46                     | 0.229                  | 0                                | 0                                | 1                                | 0                                | 2                           | 2,609.17                           | 11                  | 34                 | TRUE     |                |
| SNU216_PCL_03     | Isoform 1 of Autophagy-related protein 9A                               | IP000383396               | 94,467.50                     | 100.00%                            | 3                         | 3                        | 4                       | 0.02%                       | 7.63%                        | REDESDEGESAPDEGGEGAR             | R                   | A               | 95.00%                                  | 4.08                     | 0.515                  | 0                                | 1                                | 0                                | 0                                | 2                           | 2,014.76                           | 733                 | 751                | TRUE     |                |
| SNU216_PCL_03     | Isoform 1 of Zinc finger CCCH-type domain-cont: IP000329547             | 196,639.60                | 100.00%                       | 20                                 | 23                        | 31                       | 0.19%                   | 13.30%                      | EHSPOSDAANYSGDDKNEK          | R                                | H                   | 95.00%          | 3.12                                    | 0.406                    | 0                      | 0                                | 2                                | 0                                | 2                                | 2,167.75                    | 843                                | 860                 | TRUE               |          |                |
| SNU216_PCL_03     | Isoform 1 of Zinc finger CCCH-type domain-cont: IP000329547             | 196,639.60                | 100.00%                       | 20                                 | 23                        | 31                       | 0.19%                   | 13.30%                      | ERTPESEENVEWETNR             | K                                | D                   | 95.00%          | 2.99                                    | 0.526                    | 0                      | 1                                | 0                                | 0                                | 2                                | 2,293.86                    | 132                                | 148                 | TRUE               |          |                |
| SNU216_PCL_03     | Isoform 1 of Zinc finger CCCH-type domain-cont: IP000329547             | 196,639.60                | 100.00%                       | 20                                 | 23                        | 31                       | 0.19%                   | 13.30%                      | EVSPEVVR                     | K                                | S                   | 80.80%          | 1.55                                    | 0.251                    | 0                      | 1                                | 0                                | 0                                | 2                                | 994.4605                    | 196                                | 203                 | TRUE               |          |                |
| SNU216_PCL_03     | Isoform 1 of Zinc finger CCCH-type domain-cont: IP000329547             | 196,639.60                | 100.00%                       | 20                                 | 23                        | 31                       | 0.19%                   | 13.30%                      | FVHGSPSR                     | R                                | G                   | 92.20%          | 1.67                                    | 0.243                    | 0                      | 1                                | 0                                | 0                                | 2                                | 976.4401                    | 59                                 | 66                  | TRUE               |          |                |
| SNU216_PCL_03     | Isoform 1 of Zinc finger CCCH-type domain-cont: IP000329547             | 196,639.60                | 100.00%                       | 20                                 | 23                        | 31                       | 0.19%                   | 13.30%                      | GSDSDIDEEAAQQSK              | K                                | K                   | 95.00%          | 3.38                                    | 0.418                    | 0                      | 1                                | 0                                | 0                                | 2                                | 1,659.64                    | 1012                               | 1026                | TRUE               |          |                |
| SNU216_PCL_03     | Isoform 1 of Zinc finger CCCH-type domain-cont: IP000329547             | 196,639.60                | 100.00%                       | 20                                 | 23                        | 31                       | 0.19%                   | 13.30%                      | GNITTEDSGDQVFSK              | R                                | K                   | 95.00%          | 3.72                                    | 0.418                    | 0                      | 2                                | 0                                | 0                                | 2                                | 1,788.77                    | 980                                | 995                 | TRUE               |          |                |
| SNU216_PCL_03     | Isoform 1 of Zinc finger CCCH-type domain-cont: IP000329547             | 196,639.60                | 100.00%                       | 20                                 | 23                        | 31                       | 0.19%                   | 13.30%                      | GRTPSPPPPIEDIALGK            | K                                | K                   | 95.00%          | 4.08                                    | 0.457                    | 0                      | 0                                | 2                                | 0                                | 2                                | 2,099.00                    | 260                                | 278                 | TRUE               |          |                |
| SNU216_PCL_03     | Isoform 1 of Zinc finger CCCH-type domain-cont: IP000329547             | 196,639.60                | 100.00%                       | 20                                 | 23                        | 31                       | 0.19%                   | 13.30%                      | GRTPSPPPPIEDIALGKK           | K                                | Y                   | 95.00%          | 3.44                                    | 0.14                     | 0                      | 0                                | 1                                | 0                                | 2                                | 2,227.09                    | 260                                | 279                 | TRUE               |          |                |
| SNU216_PCL_03     | Isoform 1 of Zinc finger CCCH-type domain-cont: IP000329547             | 196,639.60                | 100.00%                       | 20                                 | 23                        | 31                       | 0.19%                   | 13.30%                      | HHSSSSQSGSQIRHSPSPR          | R                                | R                   | 95.00%          | 2.81                                    | 0.234                    | 0                      | 0                                | 0                                | 1                                | 2                                | 2,305.95                    | 331                                | 350                 | TRUE               |          |                |
| SNU216_PCL_03     | Isoform 1 of Zinc finger CCCH-type domain-cont: IP000329547             | 196,639.60                | 100.00%                       | 20                                 | 23                        | 31                       | 0.19%                   | 13.30%                      | KEDTAFSDWSDDEDVDR            | K                                | T                   | 95.00%          | 3.35                                    | 0.424                    | 0                      | 1                                | 0                                | 0                                | 2                                | 2,091.82                    | 1059                               | 1075                | TRUE               |          |                |
| SNU216_PCL_03     | Isoform 1 of Zinc finger CCCH-type domain-cont: IP000329547             | 196,639.60                | 100.00%                       | 20                                 | 23                        | 31                       | 0.19%                   | 13.30%                      | KGRTSPSPPPPIEDIALGK          | K                                | K                   | 95.00%          | 4.6                                     | 0.289                    | 0                      | 0                                | 1                                | 0                                | 2                                | 2,227.09                    | 259                                | 278                 | TRUE               |          |                |
| SNU216_PCL_03     | Isoform 1 of Zinc finger CCCH-type domain-cont: IP000329547             | 196,639.60                | 100.00%                       | 20                                 | 23                        | 31                       | 0.19%                   | 13.30%                      | KTSAVSSPLDQQR                | R                                | N                   | 95.00%          | 2.53                                    | 0.258                    | 0                      | 2                                | 0                                | 0                                | 2                                | 1,609.79                    | 236                                | 249                 | TRUE               |          |                |
| SNU216_PCL_03     | Isoform 1 of Zinc finger CCCH-type domain-cont: IP000329547             | 196,639.60                | 100.00%                       | 20                                 | 23                        | 31                       | 0.19%                   | 13.30%                      | SASPYSHLSLSPQR               | K                                | K                   | 95.00%          | 2.47                                    | 0.275                    | 0                      | 0                                | 0                                | 2                                | 1,840.67                         | 370                         | 384                                | TRUE                |                    |          |                |
| SNU216_PCL_03     | Isoform 1 of Zinc finger CCCH-type domain-cont: IP000329547             | 196,639.60                | 100.00%                       | 20                                 | 23                        | 31                       | 0.19%                   | 13.30%                      | SKGDSIDSIDEEAAQQSK           | K                                | K                   | 95.00%          | 4.14                                    | 0.4                      | 0                      | 3                                | 0                                | 0                                | 2                                | 1,874.77                    | 1010                               | 1026                | TRUE               |          |                |
| SNU216_PCL_03     | Isoform 1 of Zinc finger CCCH-type domain-cont: IP000329547             | 196,639.60                | 100.00%                       | 20                                 | 23                        | 31                       | 0.19%                   | 13.30%                      | SKLSPSPSLRK                  | R                                | S                   | 95.00%          | 2.27                                    | 0.239                    | 0                      | 0                                | 1                                | 0                                | 2                                | 1,279.68                    | 204                                | 214                 | TRUE               |          |                |
| SNU216_PCL_03     | Isoform 1 of Zinc finger CCCH-type domain-cont: IP000329547             | 196,639.60                | 100.00%                       | 20                                 | 23                        | 31                       | 0.19%                   | 13.30%                      | SLSPSHLTER                   | R                                | Q                   | 95.00%          | 2.14                                    | 0.343                    | 0                      | 2                                | 1                                | 0                                | 2                                | 1,321.58                    | 875                                | 885                 | TRUE               |          |                |
| SNU216_PCL_03     | Isoform 1 of Zinc finger CCCH-type domain-cont: IP000329547             | 196,639.60                | 100.00%                       | 20                                 | 23                        | 31                       | 0.19%                   | 13.30%                      | STSPAQQHSPSSR                | R                                | H                   | 95.00%          | 2.52                                    | 0.238                    | 0                      | 0                                | 1                                | 0                                | 2                                | 1,628.72                    | 316                                | 330                 | TRUE               |          |                |
| SNU216_PCL_03     | Isoform 1 of Zinc finger CCCH-type domain-cont: IP000329547             | 196,639.60                | 100.00%                       | 20                                 | 23                        | 31                       | 0.19%                   | 13.30%                      | TPSPPPPIEDIALGK              | K                                | K                   | 95.00%          | 3.1                                     | 0.213                    | 0                      | 1                                | 1                                | 0                                | 2                                | 1,788.82                    | 633                                | 278                 | TRUE               |          |                |
| SNU216_PCL_03     | Isoform 1 of Zinc finger CCCH-type domain-cont: IP000329547             | 196,639.60                | 100.00%                       | 20                                 | 23                        | 31                       | 0.19%                   | 13.30%                      | TPSPPPPIEDIALGKK             | R                                | Y                   | 95.00%          | 4.34                                    | 0.403                    | 0                      | 1                                | 1                                | 0                                | 2                                | 1,916.92                    | 263                                | 279                 | TRUE               |          |                |
| SNU216_PCL_03     | Isoform 1 of Zinc finger CCCH-type domain-cont: IP000329547             | 196,639.60                | 100.00%                       | 20                                 | 23                        | 31                       | 0.19%                   | 13.30%                      | YRNEGSPSPROSK                | R                                | R                   | 95.00%          | 1.65                                    | 0.324                    | 0                      | 1                                | 0                                | 0                                | 2                                | 1,842.70                    | 826                                | 839                 | TRUE               |          |                |
| SNU216_PCL_03     | Isoform 1 of Mitogen-activated protein kinase kir: IP00006752           | 142,101.10                | 99.80%                        | 1                                  | 2                         | 2                        | 0.01%                   | 1.45%                       | RDSPLQSGGQQNQSQAGQR          | R                                | N                   | 95.00%          | 5.25                                    | 0.617                    | 0                      | 1                                | 1                                | 0                                | 2                                | 1,993.88                    | 637                                | 654                 | TRUE               |          |                |
| SNU216_PCL_03     | Isoform 1 of 26S proteasome non-ATPase regulat: IP000299608             | 105,839.20                | 100.00%                       | 1                                  | 1                         | 1                        | 0.01%                   | 1.78%                       | TSSAFVGGKTPSEPEK             | K                                | D                   | 95.00%          | 3.23                                    | 0.452                    | 0                      | 1                                | 0                                | 0                                | 2                                | 1,892.81                    | 303                                | 319                 | TRUE               |          |                |
| SNU216_PCL_03     | Isoform Short of Adenomatous polyposis coli pro: IP000215877            | 300,441.80                | 99.80%                        | 2                                  | 2                         | 2                        | 0.01%                   | 1.28%                       | DIQRPDSEHGLSPDSENFWDK        | K                                | A                   | 91.70%          | 3.05                                    | 0.142                    | 0                      | 0                                | 1                                | 0                                | 2                                | 2,552.07                    | 1981                               | 2001                | TRUE               |          |                |
| SNU216_PCL_03     | Isoform Short of Adenomatous polyposis coli pro: IP000215877            | 300,441.80                | 99.80%                        | 2                                  | 2                         | 2                        | 0.01%                   | 1.28%                       | SKTPPPPPQTATQTK              | R                                | R                   | 95.00%          | 2.25                                    | 0.257                    | 0                      | 0                                | 0                                | 2                                | 1,557.77                         | 1335                        | 1348                               | TRUE                |                    |          |                |
| SNU216_PCL_03     | Isoform 8 of Bromodomain and WD-repeat doma: IP000250716,IP000289944,IP | 248,940.80                | 100.00%                       | 4                                  | 5                         | 5                        | 0.03%                   | 3.00%                       | IPELVGSPTQSTSSR              | K                                | T                   | 88.20%          | 2.51                                    | 0.146                    | 0                      | 1                                | 0                                | 0                                | 2                                | 1,751.86                    | 1468                               | 1483                | TRUE               |          |                |
| SNU216_PCL_03     | Isoform 8 of Bromodomain and WD-repeat doma: IP000250716,IP000289944,IP | 248,940.80                | 100.00%                       | 4                                  | 5                         | 5                        | 0.03%                   | 3.00%                       | LKAESISEADSEFGR              | K                                | S                   | 95.00%          | 2.9                                     | 0.336                    | 0                      | 1                                | 1                                | 0                                | 2                                | 1,877.76                    | 1782                               | 1787                | TRUE               |          |                |
| SNU216_PCL_03     | Isoform 8 of Bromodomain and WD-repeat doma: IP000250716,IP000289944,IP | 248,940.80                | 100.00%                       | 4                                  | 5                         | 5                        | 0.03%                   | 3.00%                       | RLSLDIQSPNIGLR               | R                                | R                   | 95.00%          | 3.1                                     | 0.446                    | 0                      | 0                                | 1                                | 0                                | 2                                | 1,758.93                    | 694                                | 708                 | TRUE               |          |                |
| SNU216_PCL_03     | Isoform 8 of Bromodomain and WD-repeat doma: IP000250716,IP000289944,IP | 248,940.80                | 100.00%                       | 4                                  | 5                         | 5                        | 0.03%                   | 3.00%                       | LSQALNGSDSDSEMLNSEHK         | K                                | H                   | 85.70%          | 2.47                                    | 0.166                    | 0                      | 1                                | 0                                | 0                                | 2                                | 2,448.96                    | 2009                               | 2029                | TRUE               |          |                |
| SNU216_PCL_03     | Probable ATP-dependent RNA helicase DDX46                               | IP000329791,IP000657954   | 117,465.20                    | 100.00%                            | 1                         | 1                        | 1                       | 0.01%                       | 2.71%                        | AALGLQSDSDDEAAVVIDEQESMFNSK      | K                   | K               | 95.00%                                  | 5.03                     | 0.467                  | 0                                | 0                                | 1                                | 0                                | 2                           | 3,106.31                           | 797                 | 824                | TRUE     |                |
| SNU216_PCL_03     | Isoform 1 of Serine/threonine-protein kinase PAK                        | IP00014068                | 64,072.80                     | 100.00%                            | 3                         | 3                        | 3                       | 0.02%                       | 6.94%                        | KDRPLSGPDVGTQPQAGLASGAK          | R                   | L               | 95.00%                                  | 3.4                      | 0.272                  | 0                                | 0                                | 0                                | 2                                | 2,299.14                    | 776                                | 198                 | TRUE               |          |                |
| SNU216_PCL_03     | Isoform 1 of Serine/threonine-protein kinase PAK                        | IP00014068                | 64,072.80                     | 100.00%                            | 3                         | 3                        | 3                       | 0.02%                       | 6.94%                        | KKSLVGTYPWMAPELSR                | R                   | L               | 95.00%                                  | 3.93                     | 0.497                  | 0                                | 0                                | 1                                | 0                                | 2                           | 2,184.10                           | 472                 | 489                | TRUE     |                |
| SNU216_PCL_03     | Isoform 1 of Serine/threonine-protein kinase PAK                        | IP00014068                | 64,072.80                     | 100.00%                            | 3                         | 3                        | 3                       | 0.02%                       | 6.94%                        | SLVGTYPWMAPELSR                  | K                   | L               | 95.00%                                  | 3.35                     | 0.567                  | 0                                | 0                                | 0                                | 2                                | 1,899.91                    | 474                                | 489                 | TRUE               |          |                |
| SNU216_PCL_03     | Isoform Beta-1 of DNA topoisomerase 2-beta                              | IP000027280,IP000217709   | 183,273.10                    | 100.00%                            | 14                        | 20                       | 26                      | 0.16%                       | 9.93%                        | AGSGENEGDYNPGRK                  | K                   | T               | 95.00%                                  | 2.61                     | 0.231                  | 0                                | 1                                | 0                                | 0                                | 2                           | 1,660.66                           | 1549                | 1563               | TRUE     |                |
| SNU216_PCL_03     | Isoform Beta-1 of DNA topoisomerase 2-beta                              | IP000027280,IP000217709   | 183,273.10                    | 100.00%                            | 14                        | 20                       | 26                      | 0.16%                       | 9.93%                        | FDSNEEDSASVFSFSPGLK              | K                   | Q               | 95.00%                                  | 4.05                     | 0.567                  | 0                                | 1                                | 1                                | 0                                | 2                           | 2,142.89                           | 1464                | 1482               | TRUE     |                |
| SNU216_PCL_03     | Isoform Beta-1 of DNA topoisomerase 2-beta                              | IP000027280,IP000217709   | 183,273.10                    | 100.00%                            | 14                        | 20                       | 26                      | 0.16%                       | 9.93%                        | KASGSENEGDYNPGR                  | R                   | K               | 95.00%                                  | 2.54                     | 0.367                  | 0                                | 1                                | 0                                | 0                                | 2                           | 1,740.63                           | 1548                | 1562               | TRUE     |                |
| SNU216_PCL_03     | Isoform Beta-1 of DNA topoisomerase 2-beta                              | IP000027280,IP000217709   | 183,273.10                    | 100.00%                            | 14                        | 20                       | 26                      | 0.16%                       | 9.93%                        | KASGSENEGDYNPGRK                 | R                   | T               | 95.00%                                  | 3.66                     | 0.421                  | 0                                | 2                                | 2                                | 0                                | 2                           | 1,868.72                           | 1548                | 1563               | TRUE     |                |
| SNU216_PCL_03     | Isoform Beta-1 of DNA topoisomerase 2-beta                              | IP000027280,IP000217709   | 183,273.10                    | 100.00%                            | 14                        | 20                       | 26                      | 0.16%                       | 9.93%                        | KTSFDQSDVDIFPSDFPTEPPSLR         | K                   | T               | 95.00%                                  | 4.77                     | 0.482                  | 0                                | 1                                | 3                                | 1                                | 2                           | 3,017.35                           | 1574                | 1599               | TRUE     |                |
| SNU216_PCL_03     | Isoform Beta-1 of DNA topoisomerase 2-beta                              | IP000027280,IP000217709   | 183,273.10                    | 100.00%                            | 14                        | 20                       | 26                      | 0.16%                       | 9.93%                        | KVVEAVNSDSEFGIPK                 | K                   | K               | 95.00%                                  | 2.98                     | 0.287                  | 0                                | 1                                | 0                                | 0                                | 2                           | 2,080.89                           | 1515                | 1532               | TRUE     |                |
| SNU216_PCL_03     | Isoform Beta-1 of DNA topoisomerase 2-beta                              | IP000027280,IP000217709   | 183,273.10                    | 100.00%                            | 14                        | 20                       | 26                      | 0.16%                       | 9.93%                        | SEEDSASVFSNEEDSASVFSFSPGLK       | K                   | Q               | 95.00%                                  | 4.25                     | 0.249                  | 0                                | 1                                | 2                                | 0                                | 2                           | 2,875.18                           | 1457                | 1482               | TRUE     |                |
| SNU216_PCL_03     | Isoform Beta-1 of DNA topoisomerase 2-beta                              | IP000027280,IP000217709   | 183,273.10                    | 100.00%                            | 14                        | 20                       | 26                      | 0.16%                       | 9.93%                        | SQDFGNLFSFYSQKSEDSASK            | K                   | F               | 87.90%                                  | 4.95                     | 0.0406                 | 0                                | 0                                | 1                                | 0                                | 2                           | 2,664.11                           | 1441                | 1463               | TRUE     |                |
| SNU216_PCL_03     | Isoform Beta-1 of DNA topoisomerase 2-beta                              | IP000027280,IP000217709   | 183,273.10                    | 100.00%                            | 14                        | 20                       | 26                      | 0.16%                       | 9.93%                        | TSFDFQSDVDIFPSDFPTEPPSLR         | K                   | T               | 95.00%                                  | 4.34                     | 0.38                   | 0                                | 1                                | 0                                | 2                                | 2,889.25                    | 1575                               | 1599                | TRUE               |          |                |
| SNU216_PCL_03     | Isoform Beta-1 of DNA topoisomerase 2-beta                              | IP000027280,IP000217709   | 183,273.10                    | 100.00%                            | 14                        | 20                       | 26                      | 0.16%                       | 9.93%                        | VKASPTTNDQGEDEFVPSDGLDKDEYTFSPGK | K                   | S               | 95.00%                                  | 6.95                     | 0.566                  | 0                                | 0                                | 2                                | 1                                | 2                           | 3,437.53                           | 1397                | 1427               | TRUE     |                |
| SNU216_PCL_03     | Isoform Beta-1 of DNA topoisomerase 2-beta                              | IP000027280,IP000217709   | 183,273.10                    | 100.00%                            | 14                        | 20                       | 26                      | 0.16%                       | 9.93%                        | VVEAVNSDSEFGIPK                  | K                   | K               | 95.00%                                  | 2.66                     | 0.304                  | 0                                | 1                                | 0                                | 0                                | 2                           | 1,872.83                           | 1516                | 1532               | TRUE     |                |
| SNU216_PCL_03     | Isoform Beta-1 of DNA topoisomerase 2-beta                              | IP000027280,IP000217709   | 183,273.10                    | 100.00%                            | 14                        | 20                       | 26                      | 0.16%                       | 9.93%                        | VVEAVNSDSEFGIPKK                 | K                   | T               | 95.00%                                  | 3.11                     | 0.402                  | 0                                | 1                                | 0                                | 0                                | 2                           | 2,080.89                           | 1516                | 1533               | TRUE     |                |
| SNU216_PCL_03     | Isoform Beta-1 of DNA topoisomerase 2-beta                              | IP000027280,IP000217709   | 183,273.10                    | 100.00%                            | 14                        | 20                       | 26                      | 0.16%                       | 9.93%                        | YTFDFSEEDDDAADDNNDNLEELK         | K                   | V               | 95.00%                                  | 4.24                     | 0.392                  | 0                                | 0                                | 1                                | 0                                | 2                           | 3,308.16                           | 1370                | 1396               | TRUE     |                |
| SNU216_PCL_03     | Isoform Beta-1 of DNA topoisomerase 2-beta                              | IP000027280,IP000217709   | 183,273.10                    | 100.00%                            | 14                        | 20                       | 26                      | 0.16%                       | 9.93%                        | YTFDFSEEDDDAADDNNDNLEELKKV       | K                   | A               | 95.00%                                  | 7.56                     | 0.59                   | 0                                | 0                                | 1                                | 0                                | 2                           | 3,335.32                           | 1370                | 1398               | TRUE     |                |
| SNU216_PCL_03     | Putative chloride channel protein 7                                     | IP00020                   |                               |                                    |                           |                          |                         |                             |                              |                                  |                     |                 |                                         |                          |                        |                                  |                                  |                                  |                                  |                             |                                    |                     |                    |          |                |

Supplemental Table 2. A list of all phosphorylated peptides identified in SNU216 and SNU216-LR.

| MS/MS sample name | Protein name                                       | Protein accession numbers  | Protein molecular weight (Da) | Protein identification probability | Number of unique peptides | Number of unique spectra | Number of total spectra | Percentage of total spectra | Percentage sequence coverage | Peptide sequence               | Previous amino acid | Next amino acid | Best Peptide identification probability | Best SEQUEST XCorr score | Best SEQUEST Dcn score | Number of identified +1H spectra | Number of identified +2H spectra | Number of identified +3H spectra | Number of identified +4H spectra | Number of enzymatic termini | Calculate d +1H Peptide Mass (AMU) | Peptide start index | Peptide stop index | Assigned | Other Proteins          |
|-------------------|----------------------------------------------------|----------------------------|-------------------------------|------------------------------------|---------------------------|--------------------------|-------------------------|-----------------------------|------------------------------|--------------------------------|---------------------|-----------------|-----------------------------------------|--------------------------|------------------------|----------------------------------|----------------------------------|----------------------------------|----------------------------------|-----------------------------|------------------------------------|---------------------|--------------------|----------|-------------------------|
| SNU216_PCL_03     | plectin 1 isoform 6                                | IP000186711                | 531,783.90                    | 100.00%                            | 7                         | 9                        | 15                      | 0.09%                       | 2.35%                        | GYSPYSVSGSGTAGSR               | K                   | T               | 95.00%                                  | 3.54                     | 0.057                  | 0                                | 3                                | 0                                | 0                                | 2                           | 1,862.76                           | 4610                | 4627               | TRUE     | IP000398002,IP000398779 |
| SNU216_PCL_03     | plectin 1 isoform 6                                | IP000186711                | 531,783.90                    | 100.00%                            | 7                         | 9                        | 15                      | 0.09%                       | 2.35%                        | RGSFDATGGGSMFTSSSYSSGYSGR      | R                   | R               | 95.00%                                  | 5.52                     | 0.134                  | 0                                | 1                                | 3                                | 0                                | 2                           | 2,853.15                           | 4640                | 4666               | TRUE     | IP000398002,IP000398779 |
| SNU216_PCL_03     | plectin 1 isoform 6                                | IP000186711                | 531,783.90                    | 100.00%                            | 7                         | 9                        | 15                      | 0.09%                       | 2.35%                        | SDEGQLSPATR                    | R                   | G               | 95.00%                                  | 2.23                     | 0.271                  | 0                                | 1                                | 0                                | 0                                | 2                           | 1,240.52                           | 714                 | 724                | TRUE     | IP000398002,IP000398779 |
| SNU216_PCL_03     | plectin 1 isoform 6                                | IP000186711                | 531,783.90                    | 100.00%                            | 7                         | 9                        | 15                      | 0.09%                       | 2.35%                        | SSVSGSSSYSPSPAVSR              | R                   | T               | 95.00%                                  | 3.15                     | 0.326                  | 0                                | 3                                | 0                                | 0                                | 2                           | 1,834.82                           | 4384                | 4401               | TRUE     | IP000398002,IP000398779 |
| SNU216_PCL_03     | Isoform 1 of Mediator of DNA damage checkpoint     | IP000552897,IP000641106    | 226,660.80                    | 100.00%                            | 12                        | 12                       | 12                      | 0.07%                       | 12.50%                       | AAESLTAIPAPASQLLETHPIHASICQIK  | R                   | V               | 95.00%                                  | 4.77                     | 0.356                  | 0                                | 0                                | 1                                | 0                                | 2                           | 3,020.53                           | 1763                | 1790               | TRUE     |                         |
| SNU216_PCL_03     | Isoform 1 of Mediator of DNA damage checkpoint     | IP000552897,IP000641106    | 226,660.80                    | 100.00%                            | 12                        | 12                       | 12                      | 0.07%                       | 12.50%                       | AHSEKDQPPFGSDSDSVEADK          | R                   | S               | 95.00%                                  | 4.09                     | 0.454                  | 0                                | 0                                | 1                                | 0                                | 2                           | 2,353.95                           | 483                 | 503                | TRUE     |                         |
| SNU216_PCL_03     | Isoform 1 of Mediator of DNA damage checkpoint     | IP000552897,IP000641106    | 226,660.80                    | 100.00%                            | 12                        | 12                       | 12                      | 0.07%                       | 12.50%                       | AHSEKDQPPFGSDSDSVEADKSSPGHILR  | R                   | S               | 95.00%                                  | 5.15                     | 0.266                  | 0                                | 0                                | 1                                | 2                                | 3,490.39                    | 483                                | 512                 | TRUE               |          |                         |
| SNU216_PCL_03     | Isoform 1 of Mediator of DNA damage checkpoint     | IP000552897,IP000641106    | 226,660.80                    | 100.00%                            | 12                        | 12                       | 12                      | 0.07%                       | 12.50%                       | AIPGDQHPESPVHTEPMGIQGR         | R                   | G               | 95.00%                                  | 3.58                     | 0.289                  | 0                                | 0                                | 0                                | 2                                | 2,433.10                    | 784                                | 805                 | TRUE               |          |                         |
| SNU216_PCL_03     | Isoform 1 of Mediator of DNA damage checkpoint     | IP000552897,IP000641106    | 226,660.80                    | 100.00%                            | 12                        | 12                       | 12                      | 0.07%                       | 12.50%                       | AQPPFGIDSDTDAEEER              | R                   | I               | 95.00%                                  | 3.17                     | 0.407                  | 0                                | 1                                | 0                                | 0                                | 2                           | 2,006.80                           | 321                 | 337                | TRUE     |                         |
| SNU216_PCL_03     | Isoform 1 of Mediator of DNA damage checkpoint     | IP000552897,IP000641106    | 226,660.80                    | 100.00%                            | 12                        | 12                       | 12                      | 0.07%                       | 12.50%                       | AQPPFGIDSDTDAEEERIPATPVVPMKK   | R                   | R               | 95.00%                                  | 3.41                     | 0.248                  | 0                                | 0                                | 0                                | 1                                | 2                           | 3,281.58                           | 321                 | 349                | TRUE     |                         |
| SNU216_PCL_03     | Isoform 1 of Mediator of DNA damage checkpoint     | IP000552897,IP000641106    | 226,660.80                    | 100.00%                            | 12                        | 12                       | 12                      | 0.07%                       | 12.50%                       | DSDTDVEEELPVENR                | R                   | E               | 95.00%                                  | 3.9                      | 0.549                  | 0                                | 1                                | 0                                | 0                                | 2                           | 1,955.78                           | 452                 | 467                | TRUE     |                         |
| SNU216_PCL_03     | Isoform 1 of Mediator of DNA damage checkpoint     | IP000552897,IP000641106    | 226,660.80                    | 100.00%                            | 12                        | 12                       | 12                      | 0.07%                       | 12.50%                       | GQASSPTPEPGVGAGDLPGPTSPAPVSGSQ | K                   | G               | 95.00%                                  | 4.68                     | 0.425                  | 0                                | 0                                | 1                                | 0                                | 2                           | 3,139.43                           | 960                 | 993                | TRUE     |                         |
| SNU216_PCL_03     | Isoform 1 of Mediator of DNA damage checkpoint     | IP000552897,IP000641106    | 226,660.80                    | 100.00%                            | 12                        | 12                       | 12                      | 0.07%                       | 12.50%                       | LLLAEDSEEVDFLSER               | R                   | R               | 95.00%                                  | 3.34                     | 0.395                  | 0                                | 1                                | 0                                | 0                                | 2                           | 2,073.93                           | 162                 | 178                | TRUE     |                         |
| SNU216_PCL_03     | Isoform 1 of Mediator of DNA damage checkpoint     | IP000552897,IP000641106    | 226,660.80                    | 100.00%                            | 12                        | 12                       | 12                      | 0.07%                       | 12.50%                       | QSQSMVNSDITDDEEVSAALTLAHLK     | K                   | E               | 84.00%                                  | 5.09                     | 0.0324                 | 0                                | 0                                | 1                                | 0                                | 2                           | 2,954.33                           | 394                 | 420                | TRUE     |                         |
| SNU216_PCL_03     | Isoform 1 of Mediator of DNA damage checkpoint     | IP000552897,IP000641106    | 226,660.80                    | 100.00%                            | 12                        | 12                       | 12                      | 0.07%                       | 12.50%                       | SSVKTPEPVTAPELQPSTSDQPVITSEPTS | R                   | G               | 94.50%                                  | 6.05                     | 0.0282                 | 0                                | 0                                | 1                                | 0                                | 2                           | 3,857.87                           | 1153                | 1188               | TRUE     |                         |
| SNU216_PCL_03     | Isoform 1 of Mediator of DNA damage checkpoint     | IP000552897,IP000641106    | 226,660.80                    | 100.00%                            | 12                        | 12                       | 12                      | 0.07%                       | 12.50%                       | SSVKTPESVIAPLELQPSTSR          | R                   | N               | 95.00%                                  | 2.91                     | 0.412                  | 0                                | 0                                | 1                                | 0                                | 2                           | 2,403.22                           | 1563                | 1584               | TRUE     |                         |
| SNU216_PCL_03     | Utrrophin                                          | IP00009329                 | 394,494.50                    | 100.00%                            | 2                         | 2                        | 2                       | 0.01%                       | 1.11%                        | HLESSDEDEKMEDEESAQIEVLQR       | K                   | G               | 95.00%                                  | 4.49                     | 0.508                  | 0                                | 0                                | 1                                | 0                                | 2                           | 2,926.23                           | 1792                | 1815               | TRUE     |                         |
| SNU216_PCL_03     | Utrrophin                                          | IP00009329                 | 394,494.50                    | 100.00%                            | 2                         | 2                        | 2                       | 0.01%                       | 1.11%                        | SSLPTDYLVEINK                  | R                   | I               | 95.00%                                  | 2.17                     | 0.278                  | 0                                | 1                                | 0                                | 0                                | 2                           | 1,671.82                           | 1865                | 1878               | TRUE     |                         |
| SNU216_PCL_03     | PREDICTED: hypothetical protein LOC23045 isoform 1 | IP000159652,IP000739607    | 300,632.50                    | 100.00%                            | 3                         | 3                        | 3                       | 0.02%                       | 0.93%                        | RHDEEDDDSKDR                   | R                   | E               | 95.00%                                  | 3.06                     | 0.327                  | 0                                | 0                                | 1                                | 0                                | 2                           | 1,709.68                           | 891                 | 903                | TRUE     |                         |
| SNU216_PCL_03     | PREDICTED: hypothetical protein LOC23045 isoform 1 | IP000159652,IP000739607    | 300,632.50                    | 100.00%                            | 3                         | 3                        | 3                       | 0.02%                       | 0.93%                        | RNSNTLDMIDMR                   | R                   | I               | 93.80%                                  | 2.34                     | 0.178                  | 0                                | 0                                | 1                                | 0                                | 2                           | 1,513.69                           | 1515                | 1526               | TRUE     |                         |
| SNU216_PCL_03     | PREDICTED: hypothetical protein LOC23045 isoform 1 | IP000159652,IP000739607    | 300,632.50                    | 100.00%                            | 3                         | 3                        | 3                       | 0.02%                       | 0.93%                        | SNTLDMIDMR                     | R                   | I               | 95.00%                                  | 2.74                     | 0.422                  | 0                                | 1                                | 0                                | 0                                | 2                           | 1,201.49                           | 1517                | 1526               | TRUE     |                         |
| SNU216_PCL_03     | Phosphatidate cytidyltransferase 1                 | IP00024234                 | 53,306.50                     | 99.80%                             | 1                         | 2                        | 2                       | 0.01%                       | 5.21%                        | EGEAAGGDHTESTSKDETIDDR         | R                   | Y               | 95.00%                                  | 3.14                     | 0.324                  | 0                                | 1                                | 0                                | 0                                | 2                           | 2,644.02                           | 23                  | 46                 | TRUE     |                         |
| SNU216_PCL_03     | pleckstrin homology domain interacting protein     | IP000291916                | 206,692.20                    | 100.00%                            | 10                        | 11                       | 11                      | 0.07%                       | 4.12%                        | AESSDDEEESKQK                  | K                   | Q               | 95.00%                                  | 1.28                     | 0.409                  | 0                                | 1                                | 0                                | 0                                | 2                           | 1,951.61                           | 877                 | 891                | TRUE     |                         |
| SNU216_PCL_03     | pleckstrin homology domain interacting protein     | IP000291916                | 206,692.20                    | 100.00%                            | 10                        | 11                       | 11                      | 0.07%                       | 4.12%                        | AQSYDIQAWK                     | R                   | K               | 95.00%                                  | 2.11                     | 0.328                  | 0                                | 1                                | 0                                | 0                                | 2                           | 1,289.56                           | 1313                | 1322               | TRUE     |                         |
| SNU216_PCL_03     | pleckstrin homology domain interacting protein     | IP000291916                | 206,692.20                    | 100.00%                            | 10                        | 11                       | 11                      | 0.07%                       | 4.12%                        | AQSYDIQAWKK                    | R                   | Q               | 95.00%                                  | 2.51                     | 0.324                  | 0                                | 1                                | 0                                | 0                                | 2                           | 1,417.65                           | 1313                | 1323               | TRUE     |                         |
| SNU216_PCL_03     | pleckstrin homology domain interacting protein     | IP000291916                | 206,692.20                    | 100.00%                            | 10                        | 11                       | 11                      | 0.07%                       | 4.12%                        | KVLSDSEDEK                     | K                   | D               | 95.00%                                  | 2.15                     | 0.272                  | 0                                | 1                                | 0                                | 0                                | 2                           | 1,438.54                           | 1278                | 1288               | TRUE     |                         |
| SNU216_PCL_03     | pleckstrin homology domain interacting protein     | IP000291916                | 206,692.20                    | 100.00%                            | 10                        | 11                       | 11                      | 0.07%                       | 4.12%                        | KVLSDSEDEKADVPGTSTR            | K                   | K               | 95.00%                                  | 4.11                     | 0.377                  | 0                                | 1                                | 0                                | 0                                | 2                           | 2,438.00                           | 1278                | 1298               | TRUE     |                         |
| SNU216_PCL_03     | pleckstrin homology domain interacting protein     | IP000291916                | 206,692.20                    | 100.00%                            | 10                        | 11                       | 11                      | 0.07%                       | 4.12%                        | KVNEEKDGPIISK                  | K                   | K               | 95.00%                                  | 3.5                      | 0.328                  | 0                                | 1                                | 0                                | 0                                | 2                           | 1,520.74                           | 901                 | 913                | TRUE     |                         |
| SNU216_PCL_03     | pleckstrin homology domain interacting protein     | IP000291916                | 206,692.20                    | 100.00%                            | 10                        | 11                       | 11                      | 0.07%                       | 4.12%                        | RTAFYNEDDSEEEQR                | R                   | Q               | 95.00%                                  | 3.64                     | 0.463                  | 0                                | 1                                | 1                                | 0                                | 2                           | 1,968.76                           | 1774                | 1788               | TRUE     |                         |
| SNU216_PCL_03     | pleckstrin homology domain interacting protein     | IP000291916                | 206,692.20                    | 100.00%                            | 10                        | 11                       | 11                      | 0.07%                       | 4.12%                        | TAFYNEDDSEEEQR                 | R                   | Q               | 95.00%                                  | 3.39                     | 0.563                  | 0                                | 1                                | 0                                | 0                                | 2                           | 1,812.66                           | 1775                | 1788               | TRUE     |                         |
| SNU216_PCL_03     | pleckstrin homology domain interacting protein     | IP000291916                | 206,692.20                    | 100.00%                            | 10                        | 11                       | 11                      | 0.07%                       | 4.12%                        | VLSDEDEKADVPGTSTR              | K                   | K               | 95.00%                                  | 3.82                     | 0.572                  | 0                                | 1                                | 0                                | 0                                | 2                           | 2,309.91                           | 1279                | 1298               | TRUE     |                         |
| SNU216_PCL_03     | pleckstrin homology domain interacting protein     | IP000291916                | 206,692.20                    | 100.00%                            | 10                        | 11                       | 11                      | 0.07%                       | 4.12%                        | VNEEKDGPIISK                   | K                   | K               | 95.00%                                  | 2.67                     | 0.208                  | 0                                | 1                                | 0                                | 0                                | 2                           | 1,392.64                           | 902                 | 913                | TRUE     |                         |
| SNU216_PCL_03     | Ran-binding protein 2                              | IP000221325                | 358,198.20                    | 100.00%                            | 12                        | 16                       | 16                      | 0.10%                       | 6.89%                        | ANTSGDFFKDDADYK                | K                   | T               | 95.00%                                  | 2.71                     | 0.317                  | 0                                | 0                                | 0                                | 2                                | 1,755.67                    | 1990                               | 2004                | TRUE               |          |                         |
| SNU216_PCL_03     | Ran-binding protein 2                              | IP000221325                | 358,198.20                    | 100.00%                            | 12                        | 16                       | 16                      | 0.10%                       | 6.89%                        | AVVSPPKVFGESVK                 | K                   | S               | 95.00%                                  | 2.33                     | 0.272                  | 0                                | 1                                | 0                                | 0                                | 2                           | 1,757.89                           | 2507                | 2522               | TRUE     |                         |
| SNU216_PCL_03     | Ran-binding protein 2                              | IP000221325                | 358,198.20                    | 100.00%                            | 12                        | 16                       | 16                      | 0.10%                       | 6.89%                        | EDALDDSVSSSSVHASPSSPVVK        | R                   | N               | 95.00%                                  | 5.06                     | 0.375                  | 0                                | 0                                | 1                                | 1                                | 2                           | 2,621.21                           | 2231                | 2255               | TRUE     |                         |
| SNU216_PCL_03     | Ran-binding protein 2                              | IP000221325                | 358,198.20                    | 100.00%                            | 12                        | 16                       | 16                      | 0.10%                       | 6.89%                        | FESPATGILSPR                   | R                   | G               | 95.00%                                  | 2.56                     | 0.286                  | 0                                | 1                                | 0                                | 0                                | 2                           | 1,354.64                           | 946                 | 957                | TRUE     |                         |
| SNU216_PCL_03     | Ran-binding protein 2                              | IP000221325                | 358,198.20                    | 100.00%                            | 12                        | 16                       | 16                      | 0.10%                       | 6.89%                        | KKPFDSPSDDVLVYELTPTAEQK        | K                   | A               | 95.00%                                  | 4.82                     | 0.369                  | 0                                | 0                                | 1                                | 0                                | 2                           | 2,897.37                           | 2621                | 2645               | TRUE     |                         |
| SNU216_PCL_03     | Ran-binding protein 2                              | IP000221325                | 358,198.20                    | 100.00%                            | 12                        | 16                       | 16                      | 0.10%                       | 6.89%                        | KQSLPATSTPTPASFK               | R                   | F               | 95.00%                                  | 3.03                     | 0.262                  | 0                                | 1                                | 1                                | 0                                | 2                           | 1,752.89                           | 1507                | 1522               | TRUE     |                         |
| SNU216_PCL_03     | Ran-binding protein 2                              | IP000221325                | 358,198.20                    | 100.00%                            | 12                        | 16                       | 16                      | 0.10%                       | 6.89%                        | NADSEKHSTSPSTR                 | R                   | Y               | 95.00%                                  | 1.76                     | 0.326                  | 0                                | 1                                | 0                                | 0                                | 2                           | 1,799.74                           | 770                 | 784                | TRUE     |                         |
| SNU216_PCL_03     | Ran-binding protein 2                              | IP000221325                | 358,198.20                    | 100.00%                            | 12                        | 16                       | 16                      | 0.10%                       | 6.89%                        | NHETDGGSAHGGDDDDGPHFEPVVLPLDI  | K                   | I               | 95.00%                                  | 3.61                     | 0.273                  | 0                                | 0                                | 1                                | 2                                | 3,149.28                    | 1153                               | 1181                | TRUE               |          |                         |
| SNU216_PCL_03     | Ran-binding protein 2                              | IP000221325                | 358,198.20                    | 100.00%                            | 12                        | 16                       | 16                      | 0.10%                       | 6.89%                        | NHETDGGSAHGGDDDDGPHFEPVVLPLDI  | K                   | T               | 95.00%                                  | 4.53                     | 0.543                  | 0                                | 0                                | 1                                | 1                                | 2                           | 3,618.57                           | 1153                | 1185               | TRUE     |                         |
| SNU216_PCL_03     | Ran-binding protein 2                              | IP000221325                | 358,198.20                    | 100.00%                            | 12                        | 16                       | 16                      | 0.10%                       | 6.89%                        | NLFASPTTEESINYFTKPEK           | K                   | A               | 95.00%                                  | 4.28                     | 0.212                  | 0                                | 0                                | 1                                | 0                                | 2                           | 2,630.21                           | 2595                | 2616               | TRUE     |                         |
| SNU216_PCL_03     | Ran-binding protein 2                              | IP000221325                | 358,198.20                    | 100.00%                            | 12                        | 16                       | 16                      | 0.10%                       | 6.89%                        | SALSPSKSPAK                    | K                   | L               | 89.30%                                  | 1.97                     | 0.189                  | 0                                | 1                                | 0                                | 0                                | 2                           | 1,152.57                           | 2273                | 2283               | TRUE     |                         |
| SNU216_PCL_03     | Ran-binding protein 2                              | IP000221325                | 358,198.20                    | 100.00%                            | 12                        | 16                       | 16                      | 0.10%                       | 6.89%                        | VGEDEDGSEEVVHNEDIHFEPVSLPEVEV  | K                   | S               | 95.00%                                  | 4.23                     | 0.426                  | 0                                | 0                                | 1                                | 1                                | 2                           | 3,670.63                           | 2893                | 2924               | TRUE     |                         |
| SNU216_PCL_03     | Isoform DPI of Desmoplakin                         | IP00013933                 | 331,783.20                    | 100.00%                            | 3                         | 3                        | 3                       | 0.02%                       | 1.43%                        | AESGPDLR                       | R                   | Y               | 95.00%                                  | 1.93                     | 0.346                  | 0                                | 1                                | 0                                | 0                                | 2                           | 924.3824                           | 20                  | 27                 | TRUE     |                         |
| SNU216_PCL_03     | Isoform DPI of Desmoplakin                         | IP00013933                 | 331,783.20                    | 100.00%                            | 3                         | 3                        | 3                       | 0.02%                       | 1.43%                        | SMSFGQIR                       | R                   | Q               | 95.00%                                  | 1.91                     | 0.365                  | 0                                | 1                                | 0                                | 0                                | 2                           | 1,005.42                           | 2207                | 2214               | TRUE     |                         |
| SNU216_PCL_03     | Isoform DPI of Desmoplakin                         | IP00013933                 | 331,783.20                    | 100.00%                            | 3                         | 3                        | 3                       | 0.02%                       | 1.43%                        | SSFSFDTLEESSPIAIFDITENLEK      | R                   | I               | 95.00%                                  | 4.17                     | 0.0036                 | 0                                | 1                                | 0                                | 0                                | 2                           | 2,797.23                           | 2606                | 2630               | TRUE     |                         |
| SNU216_PCL_03     | CD44 antigen isoform 4 precursor                   | IP000297160,IP000305064,IP | 53,410.80                     | 99.80%                             | 2                         | 3                        | 6                       | 0.04%                       | 10.20%                       | ESSETPQDMTADETR                | K                   | N               | 95.00%                                  | 3.27                     | 0.421                  | 0                                | 1                                | 0                                | 0                                | 2                           | 1,923.73                           | 467                 | 482                | TRUE     |                         |
| SNU216_PCL_03     | CD44 antigen isoform 4 precursor                   | IP000297160,IP000305064,IP | 53,410.80                     | 99.80%                             | 2                         | 3                        | 6                       | 0.04%                       | 10.20%                       | KPSGLNGEASKSQEMVHLVNK          | E                   | E               | 95.00%                                  | 5.18                     | 0.329                  | 0                                | 0                                | 2                                | 3                                | 2,333.13                    | 446                                | 466                 | TRUE               |          |                         |
| SNU216_PCL_03     | Structural maintenance of chromosome 3             | IP000219420                | 141,547.10                    | 100.00%                            | 3                         | 5                        | 5                       | 0.03%                       | 3.37%                        | GDVEGSQSDQEGGSGESER            | K                   | G               | 95.00%                                  | 3.71                     | 0.556                  | 0                                | 1                                | 1                                | 0                                | 2                           | 2,118.77                           | 1060                | 1079               | TRUE     |                         |
| SNU216_PCL_03     | Structural maintenance of chromosome 3             | IP000219420                | 141,54                        |                                    |                           |                          |                         |                             |                              |                                |                     |                 |                                         |                          |                        |                                  |                                  |                                  |                                  |                             |                                    |                     |                    |          |                         |

Supplemental Table 2. A list of all phosphorylated peptides identified in SNU216 and SNU216-LR.

| MS/MS sample name | Protein name                                        | Protein accession numbers  | Protein molecular weight (Da) | Protein identification probability | Number of unique peptides | Number of unique spectra | Number of total spectra | Percentage of total spectra | Percentage sequence coverage | Peptide sequence              | Previous amino acid | Next amino acid | Best Peptide identification probability | Best SEQUEST XCorr score | Best SEQUEST Dcn score | Number of identified +1H spectra | Number of identified +2H spectra | Number of identified +3H spectra | Number of identified +4H spectra | Number of enzymatic termini | Calculate d +1H Peptide Mass (AMU) | Peptide start index | Peptide stop index | Assigned | Other Proteins                      |
|-------------------|-----------------------------------------------------|----------------------------|-------------------------------|------------------------------------|---------------------------|--------------------------|-------------------------|-----------------------------|------------------------------|-------------------------------|---------------------|-----------------|-----------------------------------------|--------------------------|------------------------|----------------------------------|----------------------------------|----------------------------------|----------------------------------|-----------------------------|------------------------------------|---------------------|--------------------|----------|-------------------------------------|
| SNU216_PCL_03     | Isomform 2 of Microtubule-actin crosslinking factor | IP000256861,IP000513991,IP | 620,414.90                    | 100.00%                            | 6                         | 7                        | 7                       | 0.04%                       | 1.03%                        | MLSSSDAITQEFMDLR              | R                   | T               | 95.00%                                  | 3.92                     | 0.565                  | 0                                | 1                                | 0                                | 0                                | 2                           | 1,923.82                           | 1374                | 1389               | TRUE     |                                     |
| SNU216_PCL_03     | Isomform 2 of Microtubule-actin crosslinking factor | IP000256861,IP000513991,IP | 620,414.90                    | 100.00%                            | 6                         | 7                        | 7                       | 0.04%                       | 1.03%                        | QGSFSEDVSHK                   | R                   | G               | 95.00%                                  | 3.1                      | 0.41                   | 0                                | 1                                | 1                                | 0                                | 2                           | 1,413.60                           | 1858                | 1869               | TRUE     | IP000432363,IP000478739,IP000514468 |
| SNU216_PCL_03     | Isomform 2 of Microtubule-actin crosslinking factor | IP000256861,IP000513991,IP | 620,414.90                    | 100.00%                            | 6                         | 7                        | 7                       | 0.04%                       | 1.03%                        | RQGSFSEDVSHK                  | K                   | G               | 95.00%                                  | 2.49                     | 0.207                  | 0                                | 0                                | 1                                | 0                                | 2                           | 1,569.71                           | 1857                | 1869               | TRUE     | IP000432363,IP000478739,IP000514468 |
| SNU216_PCL_03     | Isomform 2 of Microtubule-actin crosslinking factor | IP000256861,IP000513991,IP | 620,414.90                    | 100.00%                            | 6                         | 7                        | 7                       | 0.04%                       | 1.03%                        | SMDAMSSSPTK                   | K                   | T               | 95.00%                                  | 2.57                     | 0.461                  | 0                                | 1                                | 0                                | 0                                | 2                           | 1,134.42                           | 2423                | 2432               | TRUE     | IP000432363,IP000478739,IP000514468 |
| SNU216_PCL_03     | Isomform 2 of Microtubule-actin crosslinking factor | IP000256861,IP000513991,IP | 620,414.90                    | 100.00%                            | 6                         | 7                        | 7                       | 0.04%                       | 1.03%                        | SMDAMSSPTKETVK                | K                   | A               | 95.00%                                  | 3.95                     | 0.0599                 | 0                                | 1                                | 0                                | 0                                | 2                           | 1,692.72                           | 2423                | 2437               | TRUE     | IP000432363,IP000478739,IP000514468 |
| SNU216_PCL_03     | zinc finger RNA binding protein                     | IP000333858                | 117,011.80                    | 100.00%                            | 3                         | 4                        | 4                       | 0.02%                       | 1.49%                        | RDSGDVGDFEEAGK                | R                   | K               | 95.00%                                  | 3.89                     | 0.481                  | 0                                | 1                                | 0                                | 0                                | 2                           | 1,561.62                           | 1052                | 1065               | TRUE     |                                     |
| SNU216_PCL_03     | zinc finger RNA binding protein                     | IP000333858                | 117,011.80                    | 100.00%                            | 3                         | 4                        | 4                       | 0.02%                       | 1.49%                        | RDSGDVGDFEEAGKK               | R                   | D               | 95.00%                                  | 3.6                      | 0.379                  | 0                                | 0                                | 1                                | 0                                | 2                           | 1,689.71                           | 1052                | 1066               | TRUE     |                                     |
| SNU216_PCL_03     | zinc finger RNA binding protein                     | IP000333858                | 117,011.80                    | 100.00%                            | 3                         | 4                        | 4                       | 0.02%                       | 1.49%                        | RDRSDGVDFGEAEQG               | R                   | K               | 95.00%                                  | 4.29                     | 0.35                   | 0                                | 1                                | 1                                | 0                                | 2                           | 1,717.72                           | 1051                | 1065               | TRUE     |                                     |
| SNU216_PCL_03     | Isomform 1 of Protein KIAA1967                      | IP000182757                | 103,031.30                    | 100.00%                            | 2                         | 3                        | 4                       | 0.02%                       | 2.81%                        | LEDSEVRSVASNQSEMEFSSSLQDMPK   | K                   | E               | 95.00%                                  | 4.65                     | 0.0986                 | 0                                | 0                                | 1                                | 0                                | 2                           | 3,103.27                           | 670                 | 695                | TRUE     |                                     |
| SNU216_PCL_03     | Isomform 1 of Protein KIAA1967                      | IP000182757                | 103,031.30                    | 100.00%                            | 2                         | 3                        | 4                       | 0.02%                       | 2.81%                        | SVASNQSEMEFSSSLQDMPK          | E                   | E               | 95.00%                                  | 4.39                     | 0.523                  | 0                                | 2                                | 1                                | 0                                | 2                           | 2,274.87                           | 677                 | 695                | TRUE     |                                     |
| SNU216_PCL_03     | Isomform 1 of Alpha-adducin                         | IP00019901,IP000220158     | 80,955.90                     | 100.00%                            | 3                         | 3                        | 3                       | 0.02%                       | 5.83%                        | AAVVTSPPTTAPHK                | R                   | E               | 95.00%                                  | 2.27                     | 0.319                  | 0                                | 1                                | 0                                | 0                                | 2                           | 1,553.77                           | 7                   | 21                 | TRUE     |                                     |
| SNU216_PCL_03     | Isomform 1 of Alpha-adducin                         | IP00019901,IP000220158     | 80,955.90                     | 100.00%                            | 3                         | 3                        | 3                       | 0.02%                       | 5.83%                        | SPGSPVGEETGSPGPK              | R                   | W               | 95.00%                                  | 3.05                     | 0.502                  | 0                                | 1                                | 0                                | 0                                | 2                           | 1,433.63                           | 355                 | 369                | TRUE     |                                     |
| SNU216_PCL_03     | Isomform 1 of Alpha-adducin                         | IP00019901,IP000220158     | 80,955.90                     | 100.00%                            | 3                         | 3                        | 3                       | 0.02%                       | 5.83%                        | SPGSPVGEETGSPPKWQIGEQEFALMR   | R                   | M               | 95.00%                                  | 2.9                      | 0.254                  | 0                                | 0                                | 1                                | 0                                | 2                           | 3,051.39                           | 355                 | 382                | TRUE     |                                     |
| SNU216_PCL_03     | PREDICTED: RW1 protein isoform 1                    | IP000401611                | 205,143.20                    | 99.80%                             | 2                         | 2                        | 2                       | 0.01%                       | 2.02%                        | DFDHHDSPALEVETTEQPPSLPK       | K                   | S               | 95.00%                                  | 4.69                     | 0.387                  | 0                                | 0                                | 1                                | 0                                | 2                           | 2,683.21                           | 1357                | 1379               | TRUE     |                                     |
| SNU216_PCL_03     | PREDICTED: RW1 protein isoform 1                    | IP000401611                | 205,143.20                    | 99.80%                             | 2                         | 2                        | 2                       | 0.01%                       | 2.02%                        | RSSDPWNSNHPFHEN               | R                   | -               | 95.00%                                  | 3.89                     | 0.271                  | 0                                | 0                                | 1                                | 0                                | 2                           | 1,876.74                           | 1869                | 1883               | TRUE     |                                     |
| SNU216_PCL_03     | wings apart-like homolog                            | IP000375330,IP000412441,IP | 137,365.20                    | 100.00%                            | 2                         | 3                        | 4                       | 0.02%                       | 3.03%                        | RPESPSEIPIK                   | K                   | G               | 95.00%                                  | 2.05                     | 0.171                  | 0                                | 2                                | 0                                | 0                                | 2                           | 1,499.65                           | 262                 | 273                | TRUE     |                                     |
| SNU216_PCL_03     | wings apart-like homolog                            | IP000375330,IP000412441,IP | 137,365.20                    | 100.00%                            | 2                         | 3                        | 4                       | 0.02%                       | 3.03%                        | VEESTGDPFGFSDDESLEPVSSK       | K                   | N               | 95.00%                                  | 5.12                     | 0.22                   | 0                                | 1                                | 1                                | 0                                | 2                           | 2,653.07                           | 108                 | 131                | TRUE     |                                     |
| SNU216_PCL_03     | Isomform 1 of Nuclear-interacting partner of ALK    | IP000301421,IP000339382    | 55,262.10                     | 100.00%                            | 4                         | 5                        | 5                       | 0.03%                       | 10.20%                       | LPLVPESPR                     | R                   | M               | 95.00%                                  | 2.38                     | 0.198                  | 0                                | 1                                | 1                                | 0                                | 2                           | 1,243.66                           | 315                 | 324                | TRUE     |                                     |
| SNU216_PCL_03     | Isomform 1 of Nuclear-interacting partner of ALK    | IP000301421,IP000339382    | 55,262.10                     | 100.00%                            | 4                         | 5                        | 5                       | 0.03%                       | 10.20%                       | SMGTGDTPLGLEVPSSPLR           | R                   | K               | 95.00%                                  | 3.07                     | 0.484                  | 0                                | 1                                | 0                                | 0                                | 2                           | 1,880.85                           | 381                 | 398                | TRUE     |                                     |
| SNU216_PCL_03     | Isomform 1 of Nuclear-interacting partner of ALK    | IP000301421,IP000339382    | 55,262.10                     | 100.00%                            | 4                         | 5                        | 5                       | 0.03%                       | 10.20%                       | SQDATFSPGSEQAQK               | R                   | S               | 95.00%                                  | 2.68                     | 0.224                  | 0                                | 1                                | 0                                | 0                                | 2                           | 1,661.67                           | 329                 | 343                | TRUE     |                                     |
| SNU216_PCL_03     | Isomform 1 of Nuclear-interacting partner of ALK    | IP000301421,IP000339382    | 55,262.10                     | 100.00%                            | 4                         | 5                        | 5                       | 0.03%                       | 10.20%                       | SQDATFSPGSEQAQKSPGVSR         | R                   | T               | 95.00%                                  | 5.16                     | 0.386                  | 0                                | 0                                | 1                                | 0                                | 2                           | 2,455.11                           | 329                 | 351                | TRUE     |                                     |
| SNU216_PCL_03     | Isomform 1 of 130-kDa phosphatidylinositol 4,5-bis  | IP000376976,IP000410303    | 125,764.00                    | 99.80%                             | 2                         | 2                        | 2                       | 0.01%                       | 3.18%                        | QEIEIDSDDLDDKPSPIKK           | R                   | E               | 95.00%                                  | 4.4                      | 0.238                  | 0                                | 0                                | 1                                | 0                                | 2                           | 2,396.04                           | 714                 | 733                | TRUE     |                                     |
| SNU216_PCL_03     | Isomform 1 of 130-kDa phosphatidylinositol 4,5-bis  | IP000376976,IP000410303    | 125,764.00                    | 99.80%                             | 2                         | 2                        | 2                       | 0.01%                       | 3.18%                        | TLSDDPSLPHGPPNK               | R                   | G               | 95.00%                                  | 2.53                     | 0.184                  | 0                                | 0                                | 1                                | 0                                | 2                           | 1,733.83                           | 840                 | 855                | TRUE     |                                     |
| SNU216_PCL_03     | DNA replication licensing factor MCM2               | IP000184330                | 101,898.10                    | 100.00%                            | 4                         | 5                        | 6                       | 0.04%                       | 4.31%                        | GLLYDSDEEDERPAR               | R                   | K               | 95.00%                                  | 3.17                     | 0.387                  | 0                                | 0                                | 2                                | 0                                | 2                           | 1,973.81                           | 134                 | 149                | TRUE     |                                     |
| SNU216_PCL_03     | DNA replication licensing factor MCM2               | IP000184330                | 101,898.10                    | 100.00%                            | 4                         | 5                        | 6                       | 0.04%                       | 4.31%                        | GNDPLTSSPR                    | R                   | S               | 95.00%                                  | 1.78                     | 0.309                  | 0                                | 1                                | 0                                | 0                                | 2                           | 1,180.50                           | 20                  | 30                 | TRUE     |                                     |
| SNU216_PCL_03     | DNA replication licensing factor MCM2               | IP000184330                | 101,898.10                    | 100.00%                            | 4                         | 5                        | 6                       | 0.04%                       | 4.31%                        | RGLLYDSDEEDERPAR              | R                   | K               | 95.00%                                  | 3.28                     | 0.36                   | 0                                | 0                                | 1                                | 0                                | 2                           | 2,129.91                           | 133                 | 149                | TRUE     |                                     |
| SNU216_PCL_03     | DNA replication licensing factor MCM2               | IP000184330                | 101,898.10                    | 100.00%                            | 4                         | 5                        | 6                       | 0.04%                       | 4.31%                        | RTDALTTSSPR                   | R                   | D               | 95.00%                                  | 2.47                     | 0.309                  | 0                                | 1                                | 1                                | 0                                | 2                           | 1,240.57                           | 34                  | 44                 | TRUE     |                                     |
| SNU216_PCL_03     | KIAA1802 protein (Fragment)                         | IP000064212,IP000414497    | 89,100.90                     | 100.00%                            | 5                         | 5                        | 7                       | 0.04%                       | 10.70%                       | DNQESSDAELSSSEYIK             | K                   | T               | 95.00%                                  | 3.96                     | 0.52                   | 0                                | 1                                | 0                                | 0                                | 2                           | 1,981.79                           | 622                 | 638                | TRUE     |                                     |
| SNU216_PCL_03     | KIAA1802 protein (Fragment)                         | IP000064212,IP000414497    | 89,100.90                     | 100.00%                            | 5                         | 5                        | 7                       | 0.04%                       | 10.70%                       | RKPGSPGSESPK                  | R                   | A               | 95.00%                                  | 2.32                     | 0.316                  | 0                                | 0                                | 1                                | 0                                | 2                           | 1,247.57                           | 498                 | 509                | TRUE     |                                     |
| SNU216_PCL_03     | KIAA1802 protein (Fragment)                         | IP000064212,IP000414497    | 89,100.90                     | 100.00%                            | 5                         | 5                        | 7                       | 0.04%                       | 10.70%                       | KPGSGPDNLWKLSDQR              | R                   | K               | 95.00%                                  | 2.9                      | 0.254                  | 0                                | 0                                | 2                                | 0                                | 2                           | 1,970.88                           | 441                 | 456                | TRUE     |                                     |
| SNU216_PCL_03     | KIAA1802 protein (Fragment)                         | IP000064212,IP000414497    | 89,100.90                     | 100.00%                            | 5                         | 5                        | 7                       | 0.04%                       | 10.70%                       | KPSPESEFWKPFPAVSPFPR          | R                   | R               | 95.00%                                  | 4.68                     | 0.478                  | 0                                | 0                                | 2                                | 0                                | 2                           | 2,526.21                           | 280                 | 301                | TRUE     |                                     |
| SNU216_PCL_03     | KIAA1802 protein (Fragment)                         | IP000064212,IP000414497    | 89,100.90                     | 100.00%                            | 5                         | 5                        | 7                       | 0.04%                       | 10.70%                       | LAPVSPSEFPKAPVSPESVK          | K                   | A               | 95.00%                                  | 5.07                     | 0.452                  | 0                                | 0                                | 1                                | 0                                | 2                           | 2,314.11                           | 199                 | 219                | TRUE     |                                     |
| SNU216_PCL_03     | Splicing factor, arginine/serine-rich 8             | IP000290094                | 104,823.30                    | 99.80%                             | 2                         | 2                        | 2                       | 0.01%                       | 5.05%                        | GVSQKEA QISSASVSVQSK          | R                   | I               | 95.00%                                  | 3.82                     | 0.364                  | 0                                | 0                                | 1                                | 0                                | 2                           | 2,242.10                           | 907                 | 927                | TRUE     |                                     |
| SNU216_PCL_03     | Splicing factor, arginine/serine-rich 8             | IP000290094                | 104,823.30                    | 99.80%                             | 2                         | 2                        | 2                       | 0.01%                       | 5.05%                        | GVSSDNEDDDEEDGNYLHPSLFASK     | K                   | K               | 95.00%                                  | 5.82                     | 0.558                  | 0                                | 0                                | 1                                | 0                                | 2                           | 3,022.17                           | 279                 | 305                | TRUE     |                                     |
| SNU216_PCL_03     | dispatched B                                        | IP000304587                | 152,006.50                    | 99.80%                             | 2                         | 3                        | 4                       | 0.02%                       | 3.50%                        | ARQDSQGEAEPLASPEAPAHSPK       | R                   | A               | 95.00%                                  | 4.89                     | 0.463                  | 0                                | 0                                | 2                                | 1                                | 2                           | 2,759.17                           | 1248                | 1272               | TRUE     |                                     |
| SNU216_PCL_03     | dispatched B                                        | IP000304587                | 152,006.50                    | 99.80%                             | 2                         | 3                        | 4                       | 0.02%                       | 3.50%                        | GGPGDGSPPVLPNSQDLPDVLWR       | R                   | R               | 95.00%                                  | 4.28                     | 0.259                  | 0                                | 0                                | 1                                | 0                                | 2                           | 2,552.22                           | 1367                | 1390               | TRUE     |                                     |
| SNU216_PCL_03     | nuclear receptor co-repressor 2                     | IP000001735                | 274,735.30                    | 100.00%                            | 8                         | 9                        | 10                      | 0.06%                       | 5.78%                        | ANASPQKPLDLK                  | K                   | Q               | 95.00%                                  | 2.96                     | 0.347                  | 0                                | 0                                | 1                                | 0                                | 2                           | 1,361.68                           | 953                 | 964                | TRUE     |                                     |
| SNU216_PCL_03     | nuclear receptor co-repressor 2                     | IP000001735                | 274,735.30                    | 100.00%                            | 8                         | 9                        | 10                      | 0.06%                       | 5.78%                        | EKTDDTSGEDNDEKEAVASK          | K                   | G               | 95.00%                                  | 3.77                     | 0.388                  | 0                                | 0                                | 1                                | 0                                | 2                           | 2,327.88                           | 548                 | 567                | TRUE     |                                     |
| SNU216_PCL_03     | nuclear receptor co-repressor 2                     | IP000001735                | 274,735.30                    | 100.00%                            | 8                         | 9                        | 10                      | 0.06%                       | 5.78%                        | LEPVSPSPPHITDPEELVPPR         | K                   | L               | 95.00%                                  | 5.13                     | 0.388                  | 0                                | 0                                | 2                                | 0                                | 2                           | 2,563.19                           | 145                 | 166                | TRUE     |                                     |
| SNU216_PCL_03     | nuclear receptor co-repressor 2                     | IP000001735                | 274,735.30                    | 100.00%                            | 8                         | 9                        | 10                      | 0.06%                       | 5.78%                        | LISPRSLLTGTDGPR               | A                   | A               | 95.00%                                  | 3.03                     | 0.303                  | 0                                | 0                                | 1                                | 0                                | 2                           | 1,799.94                           | 937                 | 952                | TRUE     |                                     |
| SNU216_PCL_03     | nuclear receptor co-repressor 2                     | IP000001735                | 274,735.30                    | 100.00%                            | 8                         | 9                        | 10                      | 0.06%                       | 5.78%                        | NLAPHHASPDPAPPASASDPHR        | K                   | E               | 95.00%                                  | 2.98                     | 0.208                  | 0                                | 0                                | 1                                | 2                                | 2,419.09                    | 2008                               | 2030                | TRUE               |          |                                     |
| SNU216_PCL_03     | nuclear receptor co-repressor 2                     | IP000001735                | 274,735.30                    | 100.00%                            | 8                         | 9                        | 10                      | 0.06%                       | 5.78%                        | QQQLEEAAKPPEKPVSPPIESK        | K                   | H               | 95.00%                                  | 3.99                     | 0.368                  | 0                                | 0                                | 1                                | 0                                | 2                           | 2,962.45                           | 197                 | 222                | TRUE     |                                     |
| SNU216_PCL_03     | nuclear receptor co-repressor 2                     | IP000001735                | 274,735.30                    | 100.00%                            | 8                         | 9                        | 10                      | 0.06%                       | 5.78%                        | TDDTSGEDNDEKEAVASK            | K                   | G               | 95.00%                                  | 2.79                     | 0.278                  | 0                                | 1                                | 0                                | 0                                | 2                           | 2,070.74                           | 550                 | 567                | TRUE     |                                     |
| SNU216_PCL_03     | nuclear receptor co-repressor 2                     | IP000001735                | 274,735.30                    | 100.00%                            | 8                         | 9                        | 10                      | 0.06%                       | 5.78%                        | TSVLGGGEDGIEPVSPPEGMTPEGHSR   | K                   | S               | 95.00%                                  | 2.9                      | 0.26                   | 0                                | 0                                | 1                                | 0                                | 2                           | 2,772.22                           | 2219                | 2245               | TRUE     |                                     |
| SNU216_PCL_03     | Scaffold attachment factor A2                       | IP000456887,IP000741728    | 85,105.20                     | 100.00%                            | 6                         | 7                        | 7                       | 0.04%                       | 11.00%                       | AAEQGGDDQDESKSPAGSDGER        | K                   | R               | 95.00%                                  | 2.94                     | 0.137                  | 0                                | 0                                | 1                                | 0                                | 2                           | 2,486.00                           | 175                 | 197                | TRUE     |                                     |
| SNU216_PCL_03     | Scaffold attachment factor A2                       | IP000456887,IP000741728    | 85,105.20                     | 100.00%                            | 6                         | 7                        | 7                       | 0.04%                       | 11.00%                       | EDEPEERSGDETPGSEVPGDK         | R                   | A               | 95.00%                                  | 2.36                     | 0.281                  | 0                                | 1                                | 0                                | 0                                | 2                           | 2,467.96                           | 153                 | 174                | TRUE     |                                     |
| SNU216_PCL_03     | Scaffold attachment factor A2                       | IP000456887,IP000741728    | 85,105.20                     | 100.00%                            | 6                         | 7                        | 7                       | 0.04%                       | 11.00%                       | REEDEPEERSGDETPGSEVPGDK       | K                   | A               | 95.00%                                  | 3.95                     | 0.439                  | 0                                | 0                                | 1                                | 0                                | 2                           | 2,624.06                           | 152                 | 174                | TRUE     |                                     |
| SNU216_PCL_03     | Scaffold attachment factor A2                       | IP000456887,IP000741728    | 85,105.20                     | 100.00%                            | 6                         | 7                        | 7                       | 0.04%                       | 11.00%                       | SGDETPGSEVPGDK                | R                   | A               | 95.00%                                  | 2.44                     | 0.439                  | 0                                | 1                                | 0                                | 0                                | 2                           | 1,454.57                           | 161                 | 174                | TRUE     |                                     |
| SNU216_PCL_03     | Scaffold attachment factor A2                       | IP000456887,IP000741728    | 85,105.20                     | 100.00%                            | 6                         | 7                        | 7                       | 0.04%                       | 11.00%                       | SGDETPGSEVPGDKAAEEQDDQDQSEK   | R                   | S               | 95.00%                                  | 3.88                     | 0.509                  | 0                                | 0                                | 1                                | 0                                | 2                           | 2,857.12                           | 161                 | 187                | TRUE     |                                     |
| SNU216_PCL_03     | Scaffold attachment factor A2                       | IP000456887,IP000741728    | 85,105.20                     | 100.00%                            | 6                         | 7                        | 7                       | 0.04%                       | 11.00%                       | SKSLPPEEAKDEEDQTLVNLDTYTSDLHI | R                   | D               | 95.00%                                  | 6.55                     | 0.538                  | 0                                | 0                                | 1                                | 1                                | 2                           | 4,198.92                           | 226                 | 261                |          |                                     |

Supplemental Table 2. List of all phosphorylated peptides identified in SNU216 and SNU216-LR.

| MS/MS sample name | Protein name                                       | Protein accession numbers  | Protein molecular weight (Da) | Protein identification probability | Number of unique peptides | Number of unique spectra | Number of total spectra | Percentage of total spectra | Percentage sequence coverage | Peptide sequence                | Previous amino acid | Next amino acid | Best Peptide identification probability | Best SEQUEST XCorr score | Best SEQUEST Dcn score | Number of identified +1H spectra | Number of identified +2H spectra | Number of identified +3H spectra | Number of identified +4H spectra | Number of enzymatic termini | Calculate d +1H Peptide Mass (AMU) | Peptide start index | Peptide stop index | Assigned | Other Proteins |
|-------------------|----------------------------------------------------|----------------------------|-------------------------------|------------------------------------|---------------------------|--------------------------|-------------------------|-----------------------------|------------------------------|---------------------------------|---------------------|-----------------|-----------------------------------------|--------------------------|------------------------|----------------------------------|----------------------------------|----------------------------------|----------------------------------|-----------------------------|------------------------------------|---------------------|--------------------|----------|----------------|
| SNU216_PCL_03     | Isocform 1 of Microtubule-associated protein 2     | IP00003842,IP00010728,IP   | 199,540.80                    | 100.00%                            | 11                        | 13                       | 14                      | 0.09%                       | 11.80%                       | SVPSSETVEDSR                    | K                   | T               | 95.00%                                  | 2.23                     | 0.372                  | 0                                | 1                                | 0                                | 0                                | 2                           | 1,384.60                           | 833                 | 844                | TRUE     |                |
| SNU216_PCL_03     | Isocform 1 of Large proline-rich protein BAT3      | IP000465128,IP000513728,IP | 118,691.40                    | 100.00%                            | 6                         | 8                        | 8                       | 0.05%                       | 7.98%                        | AAGARPLTSPSELRS                 | K                   | D               | 95.00%                                  | 2.24                     | 0.375                  | 0                                | 1                                | 0                                | 0                                | 2                           | 1,592.78                           | 1067                | 1081               | TRUE     |                |
| SNU216_PCL_03     | Isocform 1 of Large proline-rich protein BAT3      | IP000465128,IP000513728,IP | 118,691.40                    | 100.00%                            | 6                         | 8                        | 8                       | 0.05%                       | 7.98%                        | APPQTHLPGSSAGSTGSASATHGGSGSPPGT | R                   | G               | 93.50%                                  | 5.36                     | 0.0473                 | 0                                | 0                                | 1                                | 0                                | 2                           | 2,865.29                           | 88                  | 118                | TRUE     |                |
| SNU216_PCL_03     | Isocform 1 of Large proline-rich protein BAT3      | IP000465128,IP000513728,IP | 118,691.40                    | 100.00%                            | 6                         | 8                        | 8                       | 0.05%                       | 7.98%                        | ASPEPQRENASAPAGTTAAEAMSR        | R                   | G               | 95.00%                                  | 4.25                     | 0.398                  | 0                                | 0                                | 1                                | 0                                | 2                           | 2,564.11                           | 957                 | 980                | TRUE     |                |
| SNU216_PCL_03     | Isocform 1 of Large proline-rich protein BAT3      | IP000465128,IP000513728,IP | 118,691.40                    | 100.00%                            | 6                         | 8                        | 8                       | 0.05%                       | 7.98%                        | ENASAPAGTTAAEAMSR               | R                   | G               | 95.00%                                  | 3.34                     | 0.481                  | 0                                | 1                                | 1                                | 0                                | 2                           | 1,798.73                           | 964                 | 980                | TRUE     |                |
| SNU216_PCL_03     | Isocform 1 of Large proline-rich protein BAT3      | IP000465128,IP000513728,IP | 118,691.40                    | 100.00%                            | 6                         | 8                        | 8                       | 0.05%                       | 7.98%                        | RVGDPPQPLPEEPMEVQGAERASPEPQR    | R                   | E               | 95.00%                                  | 3.44                     | 0.301                  | 0                                | 0                                | 1                                | 1                                | 2                           | 3,176.48                           | 936                 | 963                | TRUE     |                |
| SNU216_PCL_03     | Isocform 1 of Large proline-rich protein BAT3      | IP000465128,IP000513728,IP | 118,691.40                    | 100.00%                            | 6                         | 8                        | 8                       | 0.05%                       | 7.98%                        | VGDPDPQPLPEEPMEVQGAERASPEPQR    | R                   | E               | 95.00%                                  | 3.14                     | 0.346                  | 0                                | 0                                | 1                                | 0                                | 2                           | 3,036.38                           | 937                 | 963                | TRUE     |                |
| SNU216_PCL_03     | hypothetical protein LOC55215                      | IP00019447,IP00447345      | 142,574.60                    | 99.70%                             | 1                         | 1                        | 1                       | 0.01%                       | 0.79%                        | TIETSPSLSR                      | K                   | M               | 94.30%                                  | 1.8                      | 0.259                  | 0                                | 0                                | 0                                | 0                                | 2                           | 1,170.54                           | 403                 | 412                | TRUE     |                |
| SNU216_PCL_03     | Isocform 4 of Caldesmon                            | IP000218696,IP00333771     | 61,213.30                     | 100.00%                            | 2                         | 3                        | 3                       | 0.02%                       | 4.65%                        | QSVDDKVTSPTKV                   | K                   | -               | 90.80%                                  | 2.47                     | 0.17                   | 0                                | 1                                | 0                                | 0                                | 2                           | 1,368.68                           | 521                 | 532                | TRUE     |                |
| SNU216_PCL_03     | Isocform 4 of Caldesmon                            | IP000218696,IP00333771     | 61,213.30                     | 100.00%                            | 2                         | 3                        | 3                       | 0.02%                       | 4.65%                        | IRGSIGENQIKDEK                  | K                   | I               | 95.00%                                  | 3.55                     | 0.253                  | 0                                | 1                                | 1                                | 0                                | 2                           | 1,553.73                           | 194                 | 206                | TRUE     |                |
| SNU216_PCL_03     | CAD protein                                        | IP000301263                | 242,982.50                    | 100.00%                            | 3                         | 4                        | 4                       | 0.02%                       | 2.43%                        | IHRASDPGLPAEEPKE                | R                   | E               | 95.00%                                  | 3.25                     | 0.324                  | 0                                | 0                                | 1                                | 0                                | 2                           | 1,696.81                           | 1855                | 1869               | TRUE     |                |
| SNU216_PCL_03     | CAD protein                                        | IP000301263                | 242,982.50                    | 100.00%                            | 3                         | 4                        | 4                       | 0.02%                       | 2.43%                        | IHRASDPGLPAEEPKEK               | R                   | S               | 95.00%                                  | 3.69                     | 0.35                   | 0                                | 1                                | 1                                | 0                                | 2                           | 1,953.94                           | 1855                | 1871               | TRUE     |                |
| SNU216_PCL_03     | CAD protein                                        | IP000301263                | 242,982.50                    | 100.00%                            | 3                         | 4                        | 4                       | 0.02%                       | 2.43%                        | QASPNQLGTGLLHPQTSPLLHSLVGQHLS   | R                   | D               | 95.00%                                  | 5.31                     | 0.443                  | 0                                | 0                                | 0                                | 1                                | 2                           | 4,052.11                           | 1898                | 1934               | TRUE     |                |
| SNU216_PCL_03     | zinc finger protein 609                            | IP000307591                | 151,192.70                    | 99.80%                             | 2                         | 2                        | 2                       | 0.01%                       | 1.49%                        | APSLTDLVK                       | K                   | S               | 95.00%                                  | 2.06                     | 0.267                  | 0                                | 1                                | 0                                | 0                                | 2                           | 1,023.51                           | 1053                | 1061               | TRUE     |                |
| SNU216_PCL_03     | zinc finger protein 609                            | IP000307591                | 151,192.70                    | 99.80%                             | 2                         | 2                        | 2                       | 0.01%                       | 1.49%                        | LVPHSPSPSSK                     | R                   | F               | 95.00%                                  | 2.32                     | 0.336                  | 0                                | 1                                | 0                                | 0                                | 2                           | 1,344.62                           | 571                 | 582                | TRUE     |                |
| SNU216_PCL_03     | OTTHUMP00000028561                                 | IP000396634                | 196,711.40                    | 100.00%                            | 4                         | 4                        | 4                       | 0.02%                       | 4.76%                        | EDSTLALVGGSESLPATPSAAPEPEK      | R                   | G               | 95.00%                                  | 2.97                     | 0.18                   | 0                                | 0                                | 1                                | 0                                | 2                           | 2,902.36                           | 446                 | 474                | TRUE     |                |
| SNU216_PCL_03     | OTTHUMP00000028561                                 | IP000396634                | 196,711.40                    | 100.00%                            | 4                         | 4                        | 4                       | 0.02%                       | 4.76%                        | KITPPSPHSLTSLTVSLVGHLEAMAGSK    | R                   | N               | 95.00%                                  | 5.21                     | 0.0788                 | 0                                | 0                                | 1                                | 0                                | 2                           | 3,184.56                           | 1057                | 1086               | TRUE     |                |
| SNU216_PCL_03     | OTTHUMP00000028561                                 | IP000396634                | 196,711.40                    | 100.00%                            | 4                         | 4                        | 4                       | 0.02%                       | 4.76%                        | MSPSGGAQPTTPTLR                 | K                   | S               | 95.00%                                  | 2.87                     | 0.421                  | 0                                | 1                                | 0                                | 0                                | 2                           | 1,580.71                           | 1153                | 1167               | TRUE     |                |
| SNU216_PCL_03     | OTTHUMP00000028561                                 | IP000396634                | 196,711.40                    | 100.00%                            | 4                         | 4                        | 4                       | 0.02%                       | 4.76%                        | VSPKSPPTDQKK                    | R                   | G               | 95.00%                                  | 2.31                     | 0.247                  | 0                                | 0                                | 1                                | 0                                | 2                           | 1,391.69                           | 1362                | 1373               | TRUE     |                |
| SNU216_PCL_03     | 182 kDa tankyrase 1-binding protein                | IP000304589                | 181,815.00                    | 100.00%                            | 24                        | 29                       | 30                      | 0.19%                       | 19.20%                       | DAELQDQEGFKRDSLGYTSSR           | R                   | D               | 95.00%                                  | 2.98                     | 0.145                  | 0                                | 0                                | 0                                | 1                                | 2                           | 2,482.09                           | 859                 | 879                | TRUE     |                |
| SNU216_PCL_03     | 182 kDa tankyrase 1-binding protein                | IP000304589                | 181,815.00                    | 100.00%                            | 24                        | 29                       | 30                      | 0.19%                       | 19.20%                       | DAGRPRGERSGGLFSPSTAHVPDGLAQRR   | R                   | D               | 95.00%                                  | 3.01                     | 0.341                  | 0                                | 0                                | 0                                | 1                                | 2                           | 2,929.37                           | 1015                | 1043               | TRUE     |                |
| SNU216_PCL_03     | 182 kDa tankyrase 1-binding protein                | IP000304589                | 181,815.00                    | 100.00%                            | 24                        | 29                       | 30                      | 0.19%                       | 19.20%                       | DHHGRYSSQDADEQDWEFQK            | R                   | R               | 95.00%                                  | 2.98                     | 0.185                  | 0                                | 0                                | 0                                | 1                                | 2                           | 2,558.00                           | 913                 | 932                | TRUE     |                |
| SNU216_PCL_03     | 182 kDa tankyrase 1-binding protein                | IP000304589                | 181,815.00                    | 100.00%                            | 24                        | 29                       | 30                      | 0.19%                       | 19.20%                       | DSLGAAYSQDANEQQDGLK             | R                   | R               | 95.00%                                  | 4.19                     | 0.589                  | 0                                | 1                                | 1                                | 0                                | 2                           | 2,146.89                           | 892                 | 911                | TRUE     |                |
| SNU216_PCL_03     | 182 kDa tankyrase 1-binding protein                | IP000304589                | 181,815.00                    | 100.00%                            | 24                        | 29                       | 30                      | 0.19%                       | 19.20%                       | DSLGYTSSR                       | R                   | D               | 86.20%                                  | 1.61                     | 0.166                  | 1                                | 0                                | 0                                | 0                                | 2                           | 1,065.42                           | 871                 | 879                | TRUE     |                |
| SNU216_PCL_03     | 182 kDa tankyrase 1-binding protein                | IP000304589                | 181,815.00                    | 100.00%                            | 24                        | 29                       | 30                      | 0.19%                       | 19.20%                       | DVSLGDWFEQKRRDSLGAAYSQDANEQGGQ  | R                   | R               | 95.00%                                  | 4.77                     | 0.381                  | 0                                | 0                                | 1                                | 0                                | 2                           | 3,536.56                           | 880                 | 911                | TRUE     |                |
| SNU216_PCL_03     | 182 kDa tankyrase 1-binding protein                | IP000304589                | 181,815.00                    | 100.00%                            | 24                        | 29                       | 30                      | 0.19%                       | 19.20%                       | FSEGLVQSPSQDEK                  | R                   | L               | 95.00%                                  | 3.14                     | 0.104                  | 0                                | 1                                | 0                                | 0                                | 2                           | 1,758.76                           | 428                 | 442                | TRUE     |                |
| SNU216_PCL_03     | 182 kDa tankyrase 1-binding protein                | IP000304589                | 181,815.00                    | 100.00%                            | 24                        | 29                       | 30                      | 0.19%                       | 19.20%                       | GGGGLFSPSTAHVPDGLAQRR           | R                   | D               | 95.00%                                  | 2.88                     | 0.295                  | 0                                | 1                                | 1                                | 0                                | 2                           | 2,090.97                           | 1023                | 1043               | TRUE     |                |
| SNU216_PCL_03     | 182 kDa tankyrase 1-binding protein                | IP000304589                | 181,815.00                    | 100.00%                            | 24                        | 29                       | 30                      | 0.19%                       | 19.20%                       | KEVLASPRD                       | R                   | L               | 88.10%                                  | 2.11                     | 0.159                  | 0                                | 1                                | 0                                | 0                                | 2                           | 1,094.52                           | 173                 | 181                | TRUE     |                |
| SNU216_PCL_03     | 182 kDa tankyrase 1-binding protein                | IP000304589                | 181,815.00                    | 100.00%                            | 24                        | 29                       | 30                      | 0.19%                       | 19.20%                       | LDSPPPSPTAEAEAAEAGNLAVSSR       | R                   | E               | 95.00%                                  | 5.1                      | 0.536                  | 0                                | 0                                | 1                                | 0                                | 2                           | 2,917.35                           | 492                 | 520                | TRUE     |                |
| SNU216_PCL_03     | 182 kDa tankyrase 1-binding protein                | IP000304589                | 181,815.00                    | 100.00%                            | 24                        | 29                       | 30                      | 0.19%                       | 19.20%                       | NRSAAEGLAESK                    | R                   | S               | 95.00%                                  | 2.54                     | 0.234                  | 0                                | 0                                | 1                                | 0                                | 2                           | 1,499.64                           | 1664                | 1676               | TRUE     |                |
| SNU216_PCL_03     | 182 kDa tankyrase 1-binding protein                | IP000304589                | 181,815.00                    | 100.00%                            | 24                        | 29                       | 30                      | 0.19%                       | 19.20%                       | RDSLGAAYSQDANEQQDGLGK           | K                   | R               | 95.00%                                  | 7.06                     | 0.566                  | 0                                | 1                                | 0                                | 0                                | 2                           | 2,302.99                           | 891                 | 911                | TRUE     |                |
| SNU216_PCL_03     | 182 kDa tankyrase 1-binding protein                | IP000304589                | 181,815.00                    | 100.00%                            | 24                        | 29                       | 30                      | 0.19%                       | 19.20%                       | RDSLGAAYSQDANEQQDGLGKR          | K                   | D               | 95.00%                                  | 6.59                     | 0.428                  | 0                                | 0                                | 1                                | 0                                | 2                           | 2,459.10                           | 891                 | 912                | TRUE     |                |
| SNU216_PCL_03     | 182 kDa tankyrase 1-binding protein                | IP000304589                | 181,815.00                    | 100.00%                            | 24                        | 29                       | 30                      | 0.19%                       | 19.20%                       | RESAASGLGGLLEEGAGAGAAQEVLPEGI   | R                   | D               | 95.00%                                  | 8.38                     | 0.598                  | 0                                | 0                                | 1                                | 0                                | 2                           | 3,090.44                           | 1471                | 1501               | TRUE     |                |
| SNU216_PCL_03     | 182 kDa tankyrase 1-binding protein                | IP000304589                | 181,815.00                    | 100.00%                            | 24                        | 29                       | 30                      | 0.19%                       | 19.20%                       | SAEGLAESK                       | R                   | S               | 95.00%                                  | 2.53                     | 0.469                  | 0                                | 1                                | 0                                | 0                                | 2                           | 1,229.49                           | 1666                | 1676               | TRUE     |                |
| SNU216_PCL_03     | 182 kDa tankyrase 1-binding protein                | IP000304589                | 181,815.00                    | 100.00%                            | 24                        | 29                       | 30                      | 0.19%                       | 19.20%                       | SGTRRLSSGGFPEAAQQDDEFEK         | R                   | K               | 95.00%                                  | 5.06                     | 0.121                  | 0                                | 0                                | 1                                | 0                                | 2                           | 2,910.25                           | 976                 | 1000               | TRUE     |                |
| SNU216_PCL_03     | 182 kDa tankyrase 1-binding protein                | IP000304589                | 181,815.00                    | 100.00%                            | 24                        | 29                       | 30                      | 0.19%                       | 19.20%                       | SPSQDFSFREDTILDSAMYR            | R                   | S               | 95.00%                                  | 5.49                     | 0.553                  | 0                                | 1                                | 2                                | 0                                | 2                           | 2,531.07                           | 1552                | 1572               | TRUE     |                |
| SNU216_PCL_03     | 182 kDa tankyrase 1-binding protein                | IP000304589                | 181,815.00                    | 100.00%                            | 24                        | 29                       | 30                      | 0.19%                       | 19.20%                       | SQCADVQDWEFR                    | R                   | K               | 95.00%                                  | 3.08                     | 0.488                  | 0                                | 1                                | 0                                | 0                                | 2                           | 1,589.63                           | 836                 | 847                | TRUE     |                |
| SNU216_PCL_03     | 182 kDa tankyrase 1-binding protein                | IP000304589                | 181,815.00                    | 100.00%                            | 24                        | 29                       | 30                      | 0.19%                       | 19.20%                       | VPSSDVEEVVEPQSR                 | R                   | R               | 95.00%                                  | 3.73                     | 0.393                  | 0                                | 1                                | 0                                | 0                                | 2                           | 1,846.71                           | 1618                | 1632               | TRUE     |                |
| SNU216_PCL_03     | 182 kDa tankyrase 1-binding protein                | IP000304589                | 181,815.00                    | 100.00%                            | 24                        | 29                       | 30                      | 0.19%                       | 19.20%                       | VSGAGFSSK                       | R                   | M               | 95.00%                                  | 2.33                     | 0.398                  | 0                                | 1                                | 0                                | 0                                | 2                           | 1,103.48                           | 1132                | 1142               | TRUE     |                |
| SNU216_PCL_03     | 182 kDa tankyrase 1-binding protein                | IP000304589                | 181,815.00                    | 100.00%                            | 24                        | 29                       | 30                      | 0.19%                       | 19.20%                       | WLDDLLAPPPSGGGAR                | R                   | R               | 95.00%                                  | 2.54                     | 0.188                  | 0                                | 1                                | 0                                | 0                                | 2                           | 1,788.83                           | 684                 | 700                | TRUE     |                |
| SNU216_PCL_03     | 182 kDa tankyrase 1-binding protein                | IP000304589                | 181,815.00                    | 100.00%                            | 24                        | 29                       | 30                      | 0.19%                       | 19.20%                       | WSDQGAQTSR                      | R                   | R               | 95.00%                                  | 2.13                     | 0.386                  | 0                                | 1                                | 0                                | 0                                | 2                           | 1,312.53                           | 1532                | 1542               | TRUE     |                |
| SNU216_PCL_03     | 182 kDa tankyrase 1-binding protein                | IP000304589                | 181,815.00                    | 100.00%                            | 24                        | 29                       | 30                      | 0.19%                       | 19.20%                       | YESQPELAGQESPLPLATR             | R                   | E               | 95.00%                                  | 4.43                     | 0.52                   | 0                                | 1                                | 1                                | 0                                | 2                           | 2,166.01                           | 590                 | 608                | TRUE     |                |
| SNU216_PCL_03     | 182 kDa tankyrase 1-binding protein                | IP000304589                | 181,815.00                    | 100.00%                            | 24                        | 29                       | 30                      | 0.19%                       | 19.20%                       | YSSQDADEQDWEFQKR                | R                   | D               | 95.00%                                  | 2.94                     | 0.43                   | 0                                | 1                                | 0                                | 0                                | 2                           | 2,111.83                           | 918                 | 933                | TRUE     |                |
| SNU216_PCL_03     | heterogeneous nuclear ribonucleoprotein A1 isoform | IP000215965                | 38,747.00                     | 99.80%                             | 1                         | 1                        | 1                       | 0.01%                       | 2.96%                        | SESPKEPEQLR                     | K                   | K               | 95.00%                                  | 2.08                     | 0.347                  | 0                                | 1                                | 0                                | 0                                | 2                           | 1,379.62                           | 4                   | 14                 | TRUE     |                |
| SNU216_PCL_03     | Isocform 1 of Protein phosphatase Slingshot homot  | IP000218486                | 72,994.50                     | 99.80%                             | 2                         | 3                        | 3                       | 0.02%                       | 7.28%                        | APSEELHGDQTDGFGQSQSPQKQEEQR     | K                   | Q               | 95.00%                                  | 4.54                     | 0.508                  | 0                                | 0                                | 1                                | 0                                | 2                           | 3,222.36                           | 68                  | 95                 | TRUE     |                |
| SNU216_PCL_03     | Isocform 1 of Protein phosphatase Slingshot homot  | IP000218486                | 72,994.50                     | 99.80%                             | 2                         | 3                        | 3                       | 0.02%                       | 7.28%                        | SPPGSGASTPVGWWDQAVQR            | R                   | E               | 95.00%                                  | 3.51                     | 0.368                  | 0                                | 1                                | 1                                | 0                                | 2                           | 2,073.94                           | 9                   | 28                 | TRUE     |                |
| SNU216_PCL_03     | claspin                                            | IP00160348,IP000744511,IP  | 151,281.90                    | 99.80%                             | 2                         | 3                        | 3                       | 0.02%                       | 3.44%                        | NFVFHTLSVPVKEAAK                | K                   | R               | 95.00%                                  | 3.4                      | 0.174                  | 0                                | 0                                | 1                                | 0                                | 2                           | 1,838.92                           | 1284                | 1299               | TRUE     |                |
| SNU216_PCL_03     | claspin                                            | IP00160348,IP000744511,IP  | 151,281.90                    | 99.80%                             | 2                         | 3                        | 3                       | 0.02%                       | 3.44%                        | NIDDAASQMDLHFHRDSDDDQTEQLDESEA  | K                   | W               | 95.00%                                  | 4.93                     | 0.484                  | 0                                | 0                                | 1                                | 0                                | 2                           | 3,604.43                           | 1144                | 1173               | TRUE     |                |
| SNU216_PCL_03     | PREDICTED: similar to melanoma inhibitory activit  | IP000374065,IP00455473     | 213,705.70                    | 100.00%                            | 1                         | 1                        | 1                       | 0.01%                       | 1.42%                        | WSAEASGKPPSPDQSGTATMMNSSSR      | K                   | G               | 95.00%                                  | 5.91                     | 0.0549                 | 0                                | 0                                | 1                                | 0                                | 2                           | 2,763.14                           | 1716                | 1742               | TRUE     |                |
| SNU216_PCL_03     | Isocform 1 of Tumor suppressor p53-binding prot    | IP00029778,IP000742743     | 214,114.80                    | 100.00%                            | 30                        | 38                       | 48                      | 0.30%                       | 26.20%                       | AADISLDNLVEGK                   | K                   | R               | 95.00%                                  | 2.59                     | 0.366                  | 0                                | 1                                | 0                                | 0                                | 2                           | 1,424.67                           | 1619                | 1631               | TRUE     |                |
| SNU216_PCL_03     | Isocform 1 of Tumor suppressor p53-binding prot    |                            |                               |                                    |                           |                          |                         |                             |                              |                                 |                     |                 |                                         |                          |                        |                                  |                                  |                                  |                                  |                             |                                    |                     |                    |          |                |

Supplemental Table 2. List of all phosphorylated peptides identified in SNU216 and SNU216-LR.

| MS/MS sample name | Protein name                                     | Protein accession numbers  | Protein molecular weight (Da) | Protein identification probability | Number of unique peptides | Number of unique spectra | Number of total spectra | Percentage of total spectra | Percentage sequence coverage | Peptide sequence               | Previous amino acid | Next amino acid | Best Peptide identification probability | Best SEQUEST XCorr score | Best SEQUEST DcN score | Number of identified +1H spectra | Number of identified +2H spectra | Number of identified +3H spectra | Number of identified +4H spectra | Number of enzymatic termini | Calculate d +1H Peptide Mass (AMU) | Peptide start index | Peptide stop index | Assigned | Other Proteins |
|-------------------|--------------------------------------------------|----------------------------|-------------------------------|------------------------------------|---------------------------|--------------------------|-------------------------|-----------------------------|------------------------------|--------------------------------|---------------------|-----------------|-----------------------------------------|--------------------------|------------------------|----------------------------------|----------------------------------|----------------------------------|----------------------------------|-----------------------------|------------------------------------|---------------------|--------------------|----------|----------------|
| SNU216_PCL_03     | Isocform 1 of Tumor suppressor p53-binding prot  | IP00029778,IP000742743     | 214,114.80                    | 100.00%                            | 30                        | 38                       | 48                      | 0.30%                       | 26.20%                       | SKLPDGP TGSSSEEEFLPEPFNK       | R                   | Q               | 95.00%                                  | 3.74                     | 0.337                  | 0                                | 0                                | 1                                | 0                                | 2                           | 2,856.29                           | 1754                | 1778               | TRUE     |                |
| SNU216_PCL_03     | Isocform 1 of Tumor suppressor p53-binding prot  | IP00029778,IP000742743     | 214,114.80                    | 100.00%                            | 30                        | 38                       | 48                      | 0.30%                       | 26.20%                       | SNVSSPATPATSSSSSTPTR           | R                   | K               | 95.00%                                  | 4.55                     | 0                      | 0                                | 1                                | 0                                | 2                                | 2,102.92                    | 1636                               | 1656                | TRUE               |          |                |
| SNU216_PCL_03     | Isocform 1 of Tumor suppressor p53-binding prot  | IP00029778,IP000742743     | 214,114.80                    | 100.00%                            | 30                        | 38                       | 48                      | 0.30%                       | 26.20%                       | SPEPEVLSTQEDFLDQSNK            | K                   | T               | 95.00%                                  | 4.59                     | 0.564                  | 0                                | 1                                | 1                                | 0                                | 2                           | 2,242.98                           | 299                 | 317                | TRUE     |                |
| SNU216_PCL_03     | Isocform 1 of Tumor suppressor p53-binding prot  | IP00029778,IP000742743     | 214,114.80                    | 100.00%                            | 30                        | 38                       | 48                      | 0.30%                       | 26.20%                       | STPTFVPSSPTKEQGR               | R                   | Q               | 95.00%                                  | 2.71                     | 0.33                   | 0                                | 1                                | 1                                | 0                                | 2                           | 1,811.82                           | 377                 | 392                | TRUE     |                |
| SNU216_PCL_03     | Isocform 1 of Tumor suppressor p53-binding prot  | IP00029778,IP000742743     | 214,114.80                    | 100.00%                            | 30                        | 38                       | 48                      | 0.30%                       | 26.20%                       | SVEYEGDLK                      | K                   | S               | 90.80%                                  | 1.95                     | 0.182                  | 0                                | 1                                | 0                                | 0                                | 2                           | 1,119.46                           | 814                 | 822                | TRUE     |                |
| SNU216_PCL_03     | Isocform 1 of Tumor suppressor p53-binding prot  | IP00029778,IP000742743     | 214,114.80                    | 100.00%                            | 30                        | 38                       | 48                      | 0.30%                       | 26.20%                       | TSSGTSLSAMHSSGSSGK             | R                   | G               | 92.10%                                  | 3.55                     | 0.0294                 | 0                                | 1                                | 0                                | 0                                | 2                           | 1,748.72                           | 1320                | 1337               | TRUE     |                |
| SNU216_PCL_03     | HECT domain and RCC1-like domain-containing p    | IP00005826                 | 527,469.10                    | 100.00%                            | 4                         | 4                        | 4                       | 0.02%                       | 1.39%                        | IRAEEDLAAMPFLASDNEEEDEKNGSGSLI | R                   | K               | 95.00%                                  | 5.29                     | 0.41                   | 0                                | 0                                | 0                                | 1                                | 2                           | 3,712.69                           | 2913                | 2945               | TRUE     |                |
| SNU216_PCL_03     | HECT domain and RCC1-like domain-containing p    | IP00005826                 | 527,469.10                    | 100.00%                            | 4                         | 4                        | 4                       | 0.02%                       | 1.39%                        | KDEETTPAPIYR                   | K                   | A               | 83.20%                                  | 2.34                     | 0.174                  | 0                                | 0                                | 1                                | 0                                | 2                           | 1,527.67                           | 82                  | 93                 | TRUE     |                |
| SNU216_PCL_03     | HECT domain and RCC1-like domain-containing p    | IP00005826                 | 527,469.10                    | 100.00%                            | 4                         | 4                        | 4                       | 0.02%                       | 1.39%                        | KQSPVPALPIVQLMEMGFSR           | R                   | R               | 95.00%                                  | 5.65                     | 0.495                  | 0                                | 0                                | 1                                | 0                                | 2                           | 2,407.23                           | 2452                | 2472               | TRUE     |                |
| SNU216_PCL_03     | HECT domain and RCC1-like domain-containing p    | IP00005826                 | 527,469.10                    | 100.00%                            | 4                         | 4                        | 4                       | 0.02%                       | 1.39%                        | KQSPVPALPIVQLMEMGFSR           | R                   | R               | 95.00%                                  | 5.42                     | 0.549                  | 0                                | 0                                | 1                                | 0                                | 2                           | 2,563.33                           | 2451                | 2472               | TRUE     |                |
| SNU216_PCL_03     | autoantigen RCD8                                 | IP000376317,IP000477242,IP | 131,860.10                    | 100.00%                            | 3                         | 4                        | 4                       | 0.02%                       | 6.28%                        | DSQDASAEQSDHDDVEASLASASGGFGTK  | R                   | V               | 95.00%                                  | 4.92                     | 0.031                  | 0                                | 1                                | 0                                | 0                                | 2                           | 2,962.19                           | 870                 | 898                | TRUE     |                |
| SNU216_PCL_03     | autoantigen RCD8                                 | IP000376317,IP000477242,IP | 131,860.10                    | 100.00%                            | 3                         | 4                        | 4                       | 0.02%                       | 6.28%                        | GRQCVPTATSALSLELQVEPLGLPQASPSR | K                   | T               | 95.00%                                  | 5.15                     | 0.52                   | 0                                | 1                                | 1                                | 2                                | 3,209.61                    | 696                                | 726                 | TRUE               |          |                |
| SNU216_PCL_03     | autoantigen RCD8                                 | IP000376317,IP000477242,IP | 131,860.10                    | 100.00%                            | 3                         | 4                        | 4                       | 0.02%                       | 6.28%                        | TRSPDVISSASTALSQDQIEASEALSR    | R                   | G               | 95.00%                                  | 6.74                     | 0.025                  | 0                                | 0                                | 1                                | 0                                | 2                           | 2,981.45                           | 727                 | 754                | TRUE     |                |
| SNU216_PCL_03     | Structural maintenance of chromosome 1-like 1 f  | IP000291939                | 143,238.30                    | 100.00%                            | 1                         | 1                        | 1                       | 0.01%                       | 1.95%                        | GTMDDISQEEGSSQGEDSVSGSQR       | K                   | I               | 95.00%                                  | 4.51                     | 0.01                   | 0                                | 1                                | 0                                | 0                                | 2                           | 2,565.99                           | 945                 | 968                | TRUE     |                |
| SNU216_PCL_03     | TXNDC14 protein                                  | IP000556619                | 29,643.50                     | 99.80%                             | 2                         | 2                        | 2                       | 0.01%                       | 10.50%                       | AGDNPIEEPQVASTPTTVSDGENKK      | K                   | D               | 95.00%                                  | 4.13                     | 0.295                  | 0                                | 0                                | 0                                | 1                                | 2                           | 2,664.20                           | 232                 | 256                | TRUE     |                |
| SNU216_PCL_03     | TXNDC14 protein                                  | IP000556619                | 29,643.50                     | 99.80%                             | 2                         | 2                        | 2                       | 0.01%                       | 10.50%                       | AGDNPIEEPQVASTPTTVSDGENKKDK    | K                   | -               | 95.00%                                  | 4                        | 0.303                  | 0                                | 0                                | 1                                | 0                                | 2                           | 2,907.33                           | 232                 | 258                | TRUE     |                |
| SNU216_PCL_03     | Ubiquitin carboxyl-terminal hydrolase 8          | IP000303915                | 127,527.40                    | 98.60%                             | 2                         | 2                        | 2                       | 0.01%                       | 1.52%                        | SYSSPDITQAIQEEKE               | R                   | R               | 84.80%                                  | 3.21                     | 0.0347                 | 0                                | 1                                | 0                                | 0                                | 2                           | 1,904.82                           | 716                 | 731                | TRUE     |                |
| SNU216_PCL_03     | Ubiquitin carboxyl-terminal hydrolase 8          | IP000303915                | 127,527.40                    | 98.60%                             | 2                         | 2                        | 2                       | 0.01%                       | 1.52%                        | SYSSPDITQAIQEEKEK              | R                   | K               | 90.80%                                  | 3.77                     | 0.0393                 | 0                                | 1                                | 0                                | 0                                | 2                           | 2,060.92                           | 716                 | 732                | TRUE     |                |
| SNU216_PCL_03     | Isocform 1 of PR domain zinc finger protein 2    | IP00016780                 | 188,916.30                    | 100.00%                            | 4                         | 4                        | 4                       | 0.02%                       | 4.13%                        | AHVEHMQSLPDEPLETSKEEELNDSSELY  | K                   | I               | 95.00%                                  | 6.06                     | 0.0299                 | 0                                | 0                                | 1                                | 2                                | 4,137.84                    | 1240                               | 1274                | TRUE               |          |                |
| SNU216_PCL_03     | Isocform 1 of PR domain zinc finger protein 2    | IP00016780                 | 188,916.30                    | 100.00%                            | 4                         | 4                        | 4                       | 0.02%                       | 4.13%                        | KGGHSSPASDDK                   | K                   | N               | 95.00%                                  | 2.27                     | 0.246                  | 0                                | 0                                | 1                                | 0                                | 2                           | 1,237.52                           | 1496                | 1507               | TRUE     |                |
| SNU216_PCL_03     | Isocform 1 of PR domain zinc finger protein 2    | IP00016780                 | 188,916.30                    | 100.00%                            | 4                         | 4                        | 4                       | 0.02%                       | 4.13%                        | TASPPALPK                      | R                   | I               | 95.00%                                  | 1.89                     | 0.324                  | 0                                | 1                                | 0                                | 0                                | 2                           | 961.4756                           | 641                 | 649                | TRUE     |                |
| SNU216_PCL_03     | Isocform 1 of PR domain zinc finger protein 2    | IP00016780                 | 188,916.30                    | 100.00%                            | 4                         | 4                        | 4                       | 0.02%                       | 4.13%                        | TSSPPSSQPHSPALR                | R                   | D               | 95.00%                                  | 2.37                     | 0.373                  | 0                                | 0                                | 1                                | 0                                | 2                           | 1,628.74                           | 737                 | 751                | TRUE     |                |
| SNU216_PCL_03     | modulator of estrogen induced transcription isof | IP00019996,IP000171749     | 117,151.10                    | 100.00%                            | 6                         | 8                        | 11                      | 0.07%                       | 4.92%                        | AGAGMITQSHSSASPINR             | R                   | I               | 95.00%                                  | 3.08                     | 0.177                  | 0                                | 0                                | 0                                | 0                                | 2                           | 1,891.85                           | 989                 | 1006               | TRUE     |                |
| SNU216_PCL_03     | modulator of estrogen induced transcription isof | IP00019996,IP000171749     | 117,151.10                    | 100.00%                            | 6                         | 8                        | 11                      | 0.07%                       | 4.92%                        | DGQDAIAQSPK                    | K                   | E               | 95.00%                                  | 2.42                     | 0.343                  | 1                                | 1                                | 0                                | 0                                | 2                           | 1,338.56                           | 281                 | 292                | TRUE     |                |
| SNU216_PCL_03     | modulator of estrogen induced transcription isof | IP00019996,IP000171749     | 117,151.10                    | 100.00%                            | 6                         | 8                        | 11                      | 0.07%                       | 4.92%                        | DGQDAIAQSPKESK                 | K                   | D               | 95.00%                                  | 3.54                     | 0.34                   | 0                                | 2                                | 0                                | 0                                | 2                           | 1,682.73                           | 581                 | 595                | TRUE     |                |
| SNU216_PCL_03     | modulator of estrogen induced transcription isof | IP00019996,IP000171749     | 117,151.10                    | 100.00%                            | 6                         | 8                        | 11                      | 0.07%                       | 4.92%                        | SGPHMVLIDQTK                   | R                   | G               | 95.00%                                  | 4.07                     | 0.437                  | 0                                | 1                                | 3                                | 0                                | 2                           | 1,820.90                           | 549                 | 564                | TRUE     |                |
| SNU216_PCL_03     | modulator of estrogen induced transcription isof | IP00019996,IP000171749     | 117,151.10                    | 100.00%                            | 6                         | 8                        | 11                      | 0.07%                       | 4.92%                        | RISSKSPGHMVLIDQTK              | K                   | G               | 95.00%                                  | 3.87                     | 0.247                  | 0                                | 0                                | 1                                | 0                                | 2                           | 2,056.97                           | 548                 | 564                | TRUE     |                |
| SNU216_PCL_03     | modulator of estrogen induced transcription isof | IP00019996,IP000171749     | 117,151.10                    | 100.00%                            | 6                         | 8                        | 11                      | 0.07%                       | 4.92%                        | SGPHMVLIDQTK                   | K                   | G               | 95.00%                                  | 2.86                     | 0.369                  | 0                                | 1                                | 0                                | 0                                | 2                           | 1,405.65                           | 553                 | 564                | TRUE     |                |
| SNU216_PCL_03     | Microtubule-associated protein 4 isocform 1 vari | IP000745518                | 122,943.20                    | 100.00%                            | 12                        | 16                       | 25                      | 0.16%                       | 14.70%                       | ASPSKPASAPASR                  | R                   | S               | 95.00%                                  | 3.06                     | 0.465                  | 0                                | 0                                | 1                                | 0                                | 2                           | 1,306.62                           | 814                 | 826                | TRUE     |                |
| SNU216_PCL_03     | Microtubule-associated protein 4 isocform 1 vari | IP000745518                | 122,943.20                    | 100.00%                            | 12                        | 16                       | 25                      | 0.16%                       | 14.70%                       | DGVLTLANNVPKADVPPLSEATEATVPVKD | K                   | G               | 95.00%                                  | 5.41                     | 0.202                  | 0                                | 0                                | 1                                | 2                                | 4,211.12                    | 589                                | 627                 | TRUE               |          |                |
| SNU216_PCL_03     | Microtubule-associated protein 4 isocform 1 vari | IP000745518                | 122,943.20                    | 100.00%                            | 12                        | 16                       | 25                      | 0.16%                       | 14.70%                       | DMSPTKLDVTLAK                  | K                   | D               | 95.00%                                  | 3.63                     | 0.382                  | 0                                | 2                                | 2                                | 0                                | 2                           | 1,643.76                           | 305                 | 318                | TRUE     |                |
| SNU216_PCL_03     | Microtubule-associated protein 4 isocform 1 vari | IP000745518                | 122,943.20                    | 100.00%                            | 12                        | 16                       | 25                      | 0.16%                       | 14.70%                       | DMSPLSETEMALGK                 | K                   | D               | 95.00%                                  | 3.25                     | 0.507                  | 0                                | 5                                | 0                                | 0                                | 2                           | 1,588.66                           | 533                 | 546                | TRUE     |                |
| SNU216_PCL_03     | Microtubule-associated protein 4 isocform 1 vari | IP000745518                | 122,943.20                    | 100.00%                            | 12                        | 16                       | 25                      | 0.16%                       | 14.70%                       | DMSPLSETEMALGKDVTPTTPEVTLVIK   | K                   | N               | 95.00%                                  | 4.08                     | 0.444                  | 0                                | 0                                | 3                                | 0                                | 2                           | 3,106.50                           | 533                 | 560                | TRUE     |                |
| SNU216_PCL_03     | Microtubule-associated protein 4 isocform 1 vari | IP000745518                | 122,943.20                    | 100.00%                            | 12                        | 16                       | 25                      | 0.16%                       | 14.70%                       | DVTPTTPEVTLVK                  | K                   | N               | 95.00%                                  | 2.42                     | 0.376                  | 0                                | 2                                | 1                                | 0                                | 2                           | 1,616.82                           | 547                 | 560                | TRUE     |                |
| SNU216_PCL_03     | Microtubule-associated protein 4 isocform 1 vari | IP000745518                | 122,943.20                    | 100.00%                            | 12                        | 16                       | 25                      | 0.16%                       | 14.70%                       | ETERASPKMDIAPSK                | K                   | D               | 95.00%                                  | 3.06                     | 0.212                  | 0                                | 1                                | 1                                | 0                                | 2                           | 1,852.89                           | 407                 | 422                | TRUE     |                |
| SNU216_PCL_03     | Microtubule-associated protein 4 isocform 1 vari | IP000745518                | 122,943.20                    | 100.00%                            | 12                        | 16                       | 25                      | 0.16%                       | 14.70%                       | QISEDHLSLELQDVGQSAAPTFMSPETVTG | K                   | K               | 95.00%                                  | 7                        | 0.0445                 | 0                                | 0                                | 1                                | 0                                | 2                           | 3,569.64                           | 628                 | 661                | TRUE     |                |
| SNU216_PCL_03     | Microtubule-associated protein 4 isocform 1 vari | IP000745518                | 122,943.20                    | 100.00%                            | 12                        | 16                       | 25                      | 0.16%                       | 14.70%                       | QISEDHLSLELQDVGQSAAPTFMSPETVTG | K                   | C               | 95.00%                                  | 5.98                     | 0.0767                 | 0                                | 0                                | 1                                | 1                                | 2                           | 3,697.73                           | 628                 | 662                | TRUE     |                |
| SNU216_PCL_03     | Microtubule-associated protein 4 isocform 1 vari | IP000745518                | 122,943.20                    | 100.00%                            | 12                        | 16                       | 25                      | 0.16%                       | 14.70%                       | RASPSKPASAPASR                 | K                   | S               | 95.00%                                  | 2.34                     | 0.305                  | 0                                | 0                                | 1                                | 0                                | 2                           | 1,462.72                           | 813                 | 826                | TRUE     |                |
| SNU216_PCL_03     | Microtubule-associated protein 4 isocform 1 vari | IP000745518                | 122,943.20                    | 100.00%                            | 12                        | 16                       | 25                      | 0.16%                       | 14.70%                       | SPSTLLPK                       | R                   | K               | 95.00%                                  | 1.54                     | 0.219                  | 1                                | 0                                | 0                                | 0                                | 2                           | 922.4647                           | 853                 | 860                | TRUE     |                |
| SNU216_PCL_03     | Microtubule-associated protein 4 isocform 1 vari | IP000745518                | 122,943.20                    | 100.00%                            | 12                        | 16                       | 25                      | 0.16%                       | 14.70%                       | VGSLDNVHGLPAGGAVK              | K                   | I               | 95.00%                                  | 2.36                     | 0.293                  | 0                                | 0                                | 1                                | 0                                | 2                           | 1,670.83                           | 1099                | 1115               | TRUE     |                |
| SNU216_PCL_03     | Isocform 1 of DNA                                | IP000031519                | 189,570.80                    | 100.00%                            | 5                         | 8                        | 8                       | 0.05%                       | 4.17%                        | EADDDEEVDNIPEMPSPK             | K                   | K               | 95.00%                                  | 3.87                     | 0.541                  | 0                                | 1                                | 1                                | 0                                | 2                           | 2,224.85                           | 760                 | 778                | TRUE     |                |
| SNU216_PCL_03     | Isocform 1 of DNA                                | IP000031519                | 189,570.80                    | 100.00%                            | 5                         | 8                        | 8                       | 0.05%                       | 4.17%                        | EADDDEEVDNIPEMPSPKK            | K                   | M               | 95.00%                                  | 4.48                     | 0.463                  | 0                                | 1                                | 1                                | 0                                | 2                           | 2,352.94                           | 760                 | 779                | TRUE     |                |
| SNU216_PCL_03     | Isocform 1 of DNA                                | IP000031519                | 189,570.80                    | 100.00%                            | 5                         | 8                        | 8                       | 0.05%                       | 4.17%                        | SKSDGEAKPEPSPSPR               | R                   | I               | 95.00%                                  | 2.57                     | 0.232                  | 0                                | 0                                | 1                                | 0                                | 2                           | 1,748.79                           | 203                 | 218                | TRUE     |                |
| SNU216_PCL_03     | Isocform 1 of DNA                                | IP000031519                | 189,570.80                    | 100.00%                            | 5                         | 8                        | 8                       | 0.05%                       | 4.17%                        | VGMADANSPKPKLSR                | R                   | T               | 95.00%                                  | 3.02                     | 0.362                  | 0                                | 1                                | 1                                | 0                                | 2                           | 1,860.90                           | 182                 | 198                | TRUE     |                |
| SNU216_PCL_03     | Isocform 1 of DNA                                | IP000031519                | 189,570.80                    | 100.00%                            | 5                         | 8                        | 8                       | 0.05%                       | 4.17%                        | VNPQSDKDEDEKEEK                | K                   | R               | 95.00%                                  | 3.03                     | 0.216                  | 0                                | 0                                | 1                                | 0                                | 2                           | 2,111.90                           | 369                 | 385                | TRUE     |                |
| SNU216_PCL_03     | Isocform 1 of A-kinase anchor protein 12         | IP000237884                | 191,431.60                    | 100.00%                            | 8                         | 9                        | 10                      | 0.06%                       | 8.03%                        | DSEDDSERDSKEEMATK              | R                   | S               | 95.00%                                  | 2.36                     | 0.351                  | 0                                | 0                                | 0                                | 0                                | 2                           | 2,021.80                           | 111                 | 127                | TRUE     |                |
| SNU216_PCL_03     | Isocform 1 of A-kinase anchor protein 12         | IP000237884                | 191,431.60                    | 100.00%                            | 8                         | 9                        | 10                      | 0.06%                       | 8.03%                        | EGVTPWASFVK                    | R                   | M               | 95.00%                                  | 2.14                     | 0.22                   | 0                                | 1                                | 0                                | 0                                | 2                           | 1,329.62                           | 604                 | 614                | TRUE     |                |
| SNU216_PCL_03     | Isocform 1 of A-kinase anchor protein 12         | IP000237884                | 191,431.60                    | 100.00%                            | 8                         | 9                        | 10                      | 0.06%                       | 8.03%                        | GLAEVQQDGEAEAGTSDGEEK          | K                   | K               | 95.00%                                  | 3.7                      | 0.306                  | 0                                | 2                                | 1                                | 0                                | 2                           | 2,199.89                           | 581                 | 601                | TRUE     |                |
| SNU216_PCL_03     | Isocform 1 of A-kinase anchor protein 12         | IP000237884                | 191,431.60                    | 100.00%                            | 8                         | 9                        | 10                      | 0.06%                       | 8.03%                        | GLAEVQQDGEAEAGTSDGEEKR         | K                   | E               | 94.00%                                  | 3.98                     | 0.131                  | 0                                | 0                                | 0                                | 0                                | 2                           | 2,484.09                           | 581                 | 603                | TRUE     |                |
| SNU216_PCL_03     | Isocform 1 of A-kinase anchor protein 12         | IP000237884                | 191,431.60                    | 100.00%                            | 8                         | 9                        | 10                      | 0.06%                       | 8.03%                        | LTASEQAHQPEAEASAHERPLSAEYK     | K                   | V               | 95.00%                                  | 4.34                     | 0.483                  | 0                                | 0                                | 1                                | 0                                | 2                           | 3,085.39                           | 349                 | 375                | TRUE     |                |
| SNU216_PCL_03     | Isocform 1 of A-kinase anchor protein 12         | IP000237884                | 191,431.60                    | 100.00%                            | 8                         | 9                        | 10                      | 0.0                         |                              |                                |                     |                 |                                         |                          |                        |                                  |                                  |                                  |                                  |                             |                                    |                     |                    |          |                |

Supplemental Table 2. List of all phosphorylated peptides identified in SNU216 and SNU216-LR.

| MS/MS sample name | Protein name                                       | Protein accession numbers  | Protein molecular weight (Da) | Protein identification probability | Number of unique peptides | Number of unique spectra | Number of total spectra | Percentage of total spectra | Percentage sequence coverage | Peptide sequence                              | Previous amino acid | Next amino acid | Best Peptide identification probability | Best SEQUEST XCorr score | Best SEQUEST Dcn score | Number of identified +1H spectra | Number of identified +2H spectra | Number of identified +3H spectra | Number of identified +4H spectra | Number of enzymatic termini | Calculate d +1H Peptide Mass (AMU) | Peptide start index | Peptide stop index | Assigned | Other Proteins |
|-------------------|----------------------------------------------------|----------------------------|-------------------------------|------------------------------------|---------------------------|--------------------------|-------------------------|-----------------------------|------------------------------|-----------------------------------------------|---------------------|-----------------|-----------------------------------------|--------------------------|------------------------|----------------------------------|----------------------------------|----------------------------------|----------------------------------|-----------------------------|------------------------------------|---------------------|--------------------|----------|----------------|
| SNU216_PCL_03     | FMRP interacting protein, 82kD                     | IP000002349                | 76,121.10                     | 100.00%                            | 3                         | 3                        | 4                       | 0.02%                       | 5.61%                        | RTSPQVLGSLK                                   | K                   | S               | 95.00%                                  | 3.18                     | 0.36                   | 0                                | 1                                | 0                                | 0                                | 2                           | 1,378.75                           | 570                 | 581                | TRUE     |                |
| SNU216_PCL_03     | Isoform Long of Plakophilin-4                      | IP000021076,IP000334400,IP | 127,145.30                    | 99.80%                             | 2                         | 2                        | 2                       | 0.01%                       | 1.32%                        | VASPSQGQGVSSSPKR                              | R                   | R               | 95.00%                                  | 2.49                     | 0.291                  | 0                                | 1                                | 0                                | 0                                | 2                           | 1,495.68                           | 325                 | 339                | TRUE     |                |
| SNU216_PCL_03     | Isoform Long of Plakophilin-4                      | IP000021076,IP000334400,IP | 127,145.30                    | 99.80%                             | 2                         | 2                        | 2                       | 0.01%                       | 1.32%                        | VASPSQGQGVSSSPKR                              | R                   | S               | 95.00%                                  | 3.19                     | 0.236                  | 0                                | 1                                | 0                                | 0                                | 2                           | 1,651.78                           | 325                 | 340                | TRUE     |                |
| SNU216_PCL_03     | PREDICTED: similar to MAX-interacting protein iso  | IP00163866,IP00737498      | 315,122.20                    | 99.90%                             | 2                         | 2                        | 2                       | 0.01%                       | 1.68%                        | NSSDQEGHNISSSSGHR                             | K                   | V               | 95.00%                                  | 2.7                      | 0.467                  | 0                                | 1                                | 0                                | 0                                | 2                           | 1,855.72                           | 275                 | 291                | TRUE     |                |
| SNU216_PCL_03     | PREDICTED: similar to MAX-interacting protein iso  | IP00163866,IP00737498      | 315,122.20                    | 99.90%                             | 2                         | 2                        | 2                       | 0.01%                       | 1.68%                        | NTVPSPGSTFFDVKKPDLVDGVGLVFSFEK                | K                   | E               | 95.00%                                  | 5.36                     | 0.569                  | 0                                | 0                                | 1                                | 0                                | 2                           | 3,402.60                           | 641                 | 671                | TRUE     |                |
| SNU216_PCL_03     | Isoform 1 of Pleckstrin homology domain-contain    | IP000000856                | 77,863.90                     | 100.00%                            | 4                         | 4                        | 4                       | 0.02%                       | 8.09%                        | EVDEVDAALSDLEITLEGKK                          | K                   | T               | 95.00%                                  | 2.61                     | 0.415                  | 0                                | 1                                | 0                                | 0                                | 2                           | 2,183.00                           | 342                 | 361                | TRUE     |                |
| SNU216_PCL_03     | Isoform 1 of Pleckstrin homology domain-contain    | IP000000856                | 77,863.90                     | 100.00%                            | 4                         | 4                        | 4                       | 0.02%                       | 8.09%                        | KKLDDQSEDEALEGLPLITPGSGSIYSSPGL <sup>1</sup>  | K                   | T               | 95.00%                                  | 7.11                     | 0.518                  | 0                                | 0                                | 1                                | 0                                | 2                           | 3,803.82                           | 153                 | 187                | TRUE     |                |
| SNU216_PCL_03     | Isoform 1 of Pleckstrin homology domain-contain    | IP000000856                | 77,863.90                     | 100.00%                            | 4                         | 4                        | 4                       | 0.02%                       | 8.09%                        | KLLDDQSEDEALEGLPLITPGSGSIYSSPGLY <sup>2</sup> | K                   | T               | 95.00%                                  | 6.46                     | 0.551                  | 0                                | 0                                | 1                                | 0                                | 2                           | 3,675.72                           | 154                 | 187                | TRUE     |                |
| SNU216_PCL_03     | Isoform 1 of Pleckstrin homology domain-contain    | IP000000856                | 77,863.90                     | 100.00%                            | 4                         | 4                        | 4                       | 0.02%                       | 8.09%                        | LDDQSEDEALEGLPLITPGSGSIYSSPGLYS <sup>3</sup>  | K                   | T               | 95.00%                                  | 3.52                     | 0.396                  | 0                                | 0                                | 1                                | 0                                | 2                           | 3,547.63                           | 155                 | 187                | TRUE     |                |
| SNU216_PCL_03     | Nuclear pore complex protein Nup153                | IP00292059,IP00480157,IP   | 153,890.10                    | 99.70%                             | 1                         | 1                        | 1                       | 0.01%                       | 1.56%                        | EIKDSTSQHDDNNISTTSGFSSR                       | K                   | A               | 95.00%                                  | 3                        | 0.399                  | 0                                | 0                                | 1                                | 0                                | 2                           | 2,607.08                           | 168                 | 190                | TRUE     |                |
| SNU216_PCL_03     | KIAA1618 protein (Fragment)                        | IP000242962                | 160,276.10                    | 99.80%                             | 2                         | 2                        | 2                       | 0.01%                       | 1.98%                        | EAAEPLSEPKEDQEAALLSEPEEESER                   | R                   | H               | 95.00%                                  | 5.35                     | 0.497                  | 0                                | 0                                | 1                                | 0                                | 2                           | 3,221.39                           | 1104                | 1131               | TRUE     |                |
| SNU216_PCL_03     | KIAA1618 protein (Fragment)                        | IP000242962                | 160,276.10                    | 99.80%                             | 2                         | 2                        | 2                       | 0.01%                       | 1.98%                        | EDQEAALLSEPEEESER                             | K                   | H               | 95.00%                                  | 3.62                     | 0.356                  | 0                                | 1                                | 0                                | 0                                | 2                           | 2,169.87                           | 1114                | 1131               | TRUE     |                |
| SNU216_PCL_03     | Isoform D of Plasma membrane calcium-transpor      | IP00021695,IP000216527,IP  | 137,808.20                    | 100.00%                            | 3                         | 4                        | 4                       | 0.02%                       | 2.94%                        | IEDSEPHILIDDTDAEDDAPTK                        | R                   | R               | 95.00%                                  | 3.35                     | 0.326                  | 0                                | 0                                | 1                                | 0                                | 2                           | 2,616.12                           | 1181                | 1203               | TRUE     |                |
| SNU216_PCL_03     | Isoform D of Plasma membrane calcium-transpor      | IP00021695,IP000216527,IP  | 137,808.20                    | 100.00%                            | 3                         | 4                        | 4                       | 0.02%                       | 2.94%                        | IEDSEPHILIDDTDAEDDAPTKR                       | R                   | N               | 95.00%                                  | 5.41                     | 0.483                  | 0                                | 0                                | 1                                | 1                                | 2                           | 2,772.23                           | 1181                | 1204               | TRUE     |                |
| SNU216_PCL_03     | Isoform D of Plasma membrane calcium-transpor      | IP00021695,IP000216527,IP  | 137,808.20                    | 100.00%                            | 3                         | 4                        | 4                       | 0.02%                       | 2.94%                        | SSHINFMTHEPFR                                 | R                   | I               | 95.00%                                  | 2.86                     | 0.23                   | 0                                | 0                                | 1                                | 0                                | 2                           | 1,682.71                           | 1168                | 1180               | TRUE     |                |
| SNU216_PCL_03     | Msx2-interacting protein                           | IP00045914                 | 402,244.70                    | 100.00%                            | 8                         | 9                        | 10                      | 0.06%                       | 3.36%                        | DLEPGVEPSDSEDGEHK                             | R                   | S               | 95.00%                                  | 3.2                      | 0.504                  | 0                                | 2                                | 1                                | 0                                | 2                           | 2,034.78                           | 1372                | 1389               | TRUE     |                |
| SNU216_PCL_03     | Msx2-interacting protein                           | IP00045914                 | 402,244.70                    | 100.00%                            | 8                         | 9                        | 10                      | 0.06%                       | 3.36%                        | ESGVVAVSPKESPOKEDGLSSQLK                      | R                   | S               | 95.00%                                  | 4.47                     | 0.368                  | 0                                | 0                                | 1                                | 0                                | 2                           | 2,795.33                           | 2113                | 2138               | TRUE     |                |
| SNU216_PCL_03     | Msx2-interacting protein                           | IP00045914                 | 402,244.70                    | 100.00%                            | 8                         | 9                        | 10                      | 0.06%                       | 3.36%                        | FGSPKKDVDEYR                                  | K                   | R               | 95.00%                                  | 2.57                     | 0.336                  | 0                                | 0                                | 1                                | 0                                | 2                           | 1,649.72                           | 1192                | 1204               | TRUE     |                |
| SNU216_PCL_03     | Msx2-interacting protein                           | IP00045914                 | 402,244.70                    | 100.00%                            | 8                         | 9                        | 10                      | 0.06%                       | 3.36%                        | HGSFHEDEDPGSSR                                | R                   | L               | 95.00%                                  | 2.7                      | 0.258                  | 0                                | 0                                | 1                                | 0                                | 2                           | 1,759.71                           | 1266                | 1280               | TRUE     |                |
| SNU216_PCL_03     | Msx2-interacting protein                           | IP00045914                 | 402,244.70                    | 100.00%                            | 8                         | 9                        | 10                      | 0.06%                       | 3.36%                        | SDPVDPDKPEKEEDVSAGSPSEATQLAK                  | K                   | Q               | 95.00%                                  | 5.24                     | 0.43                   | 0                                | 0                                | 1                                | 0                                | 2                           | 3,103.40                           | 2139                | 2167               | TRUE     |                |
| SNU216_PCL_03     | Msx2-interacting protein                           | IP00045914                 | 402,244.70                    | 100.00%                            | 8                         | 9                        | 10                      | 0.06%                       | 3.36%                        | SESPQKEDGLSSQLK                               | K                   | S               | 95.00%                                  | 2.1                      | 0.284                  | 0                                | 1                                | 0                                | 0                                | 2                           | 1,712.77                           | 2124                | 2138               | TRUE     |                |
| SNU216_PCL_03     | Msx2-interacting protein                           | IP00045914                 | 402,244.70                    | 100.00%                            | 8                         | 9                        | 10                      | 0.06%                       | 3.36%                        | SLVHEVGKPPQDVTDSDSPSK                         | R                   | K               | 95.00%                                  | 3.51                     | 0.372                  | 0                                | 0                                | 1                                | 0                                | 2                           | 2,312.08                           | 1206                | 1226               | TRUE     |                |
| SNU216_PCL_03     | Msx2-interacting protein                           | IP00045914                 | 402,244.70                    | 100.00%                            | 8                         | 9                        | 10                      | 0.06%                       | 3.36%                        | SLVHEVGKPPQDVTDSDSPSKK                        | R                   | K               | 95.00%                                  | 3.36                     | 0.248                  | 0                                | 0                                | 1                                | 0                                | 2                           | 2,440.18                           | 1206                | 1227               | TRUE     |                |
| SNU216_PCL_03     | Retinoblastoma-associated protein                  | IP00302829                 | 106,164.60                    | 100.00%                            | 4                         | 5                        | 5                       | 0.03%                       | 8.84%                        | ISEGLPTTKMTPR                                 | K                   | S               | 95.00%                                  | 2.63                     | 0.217                  | 0                                | 1                                | 0                                | 0                                | 2                           | 1,607.79                           | 815                 | 828                | TRUE     |                |
| SNU216_PCL_03     | Retinoblastoma-associated protein                  | IP00302829                 | 106,164.60                    | 100.00%                            | 4                         | 5                        | 5                       | 0.03%                       | 8.84%                        | KSNLDEEVNVPHTPVR                              | R                   | T               | 95.00%                                  | 3.97                     | 0.294                  | 0                                | 0                                | 1                                | 0                                | 2                           | 2,124.05                           | 359                 | 376                | TRUE     |                |
| SNU216_PCL_03     | Retinoblastoma-associated protein                  | IP00302829                 | 106,164.60                    | 100.00%                            | 4                         | 5                        | 5                       | 0.03%                       | 8.84%                        | KTAATAAAAAEAPPAAPPPPEEDPEQDS <sup>1</sup>     | R                   | L               | 95.00%                                  | 7.06                     | 0.614                  | 0                                | 0                                | 1                                | 1                                | 2                           | 3,976.89                           | 8                   | 46                 | TRUE     |                |
| SNU216_PCL_03     | Retinoblastoma-associated protein                  | IP00302829                 | 106,164.60                    | 100.00%                            | 4                         | 5                        | 5                       | 0.03%                       | 8.84%                        | TAVIPINGSSR                                   | K                   | T               | 95.00%                                  | 2.33                     | 0.351                  | 0                                | 1                                | 0                                | 0                                | 2                           | 1,204.61                           | 241                 | 251                | TRUE     |                |
| SNU216_PCL_03     | Myosin-10                                          | IP00397526                 | 228,945.20                    | 100.00%                            | 2                         | 2                        | 2                       | 0.01%                       | 1.01%                        | QHLLEGASLESDDDTESK                            | R                   | T               | 95.00%                                  | 3.6                      | 0.254                  | 0                                | 1                                | 0                                | 0                                | 2                           | 2,166.94                           | 1945                | 1963               | TRUE     |                |
| SNU216_PCL_03     | Myosin-10                                          | IP00397526                 | 228,945.20                    | 100.00%                            | 2                         | 2                        | 2                       | 0.01%                       | 1.01%                        | RQHLEGASLESDDDTESK                            | R                   | T               | 95.00%                                  | 4.88                     | 0.391                  | 0                                | 0                                | 1                                | 0                                | 2                           | 2,323.05                           | 1944                | 1963               | TRUE     |                |
| SNU216_PCL_03     | signal-induced proliferation-associated 1 like 1   | IP000413362,IP000435422    | 200,032.20                    | 100.00%                            | 4                         | 4                        | 5                       | 0.03%                       | 3.44%                        | HALSSPQSPPTPTSR                               | K                   | R               | 95.00%                                  | 3.3                      | 0.274                  | 0                                | 0                                | 2                                | 0                                | 2                           | 2,023.93                           | 1560                | 1577               | TRUE     |                |
| SNU216_PCL_03     | signal-induced proliferation-associated 1 like 1   | IP000413362,IP000435422    | 200,032.20                    | 100.00%                            | 4                         | 4                        | 5                       | 0.03%                       | 3.44%                        | LDLSEPTPESQK                                  | K                   | S               | 95.00%                                  | 2.77                     | 0.294                  | 0                                | 1                                | 0                                | 0                                | 2                           | 1,536.72                           | 1544                | 1556               | TRUE     |                |
| SNU216_PCL_03     | signal-induced proliferation-associated 1 like 1   | IP000413362,IP000435422    | 200,032.20                    | 100.00%                            | 4                         | 4                        | 5                       | 0.03%                       | 3.44%                        | RSPGSDIYVTSYSSMALAR                           | R                   | S               | 95.00%                                  | 4.08                     | 0.459                  | 0                                | 0                                | 1                                | 0                                | 2                           | 2,103.03                           | 1125                | 1143               | TRUE     |                |
| SNU216_PCL_03     | signal-induced proliferation-associated 1 like 1   | IP000413362,IP000435422    | 200,032.20                    | 100.00%                            | 4                         | 4                        | 5                       | 0.03%                       | 3.44%                        | TLSDSEIYNSQR                                  | R                   | E               | 95.00%                                  | 2.67                     | 0.304                  | 0                                | 1                                | 0                                | 0                                | 2                           | 1,492.63                           | 1583                | 1594               | TRUE     |                |
| SNU216_PCL_03     | Proline and glutamic acid rich nuclear protein iso | IP00178047                 | 110,224.90                    | 99.80%                             | 2                         | 2                        | 2                       | 0.01%                       | 4.22%                        | AGSNEDILAPSGTPPTPDDTFFGR                      | R                   | V               | 95.00%                                  | 4.01                     | 0.426                  | 0                                | 0                                | 1                                | 0                                | 2                           | 2,870.33                           | 644                 | 671                | TRUE     |                |
| SNU216_PCL_03     | Proline and glutamic acid rich nuclear protein iso | IP00178047                 | 110,224.90                    | 99.80%                             | 2                         | 2                        | 2                       | 0.01%                       | 4.22%                        | GSPDGLQTKGSPAPK                               | R                   | K               | 95.00%                                  | 2.41                     | 0.266                  | 0                                | 1                                | 0                                | 0                                | 2                           | 1,606.75                           | 478                 | 493                | TRUE     |                |
| SNU216_PCL_03     | Epilakin                                           | IP00010951                 | 553,088.70                    | 99.80%                             | 1                         | 1                        | 1                       | 0.01%                       | 0.38%                        | QVSASELHTKILGCLFTR                            | R                   | D               | 95.00%                                  | 2.59                     | 0.254                  | 0                                | 1                                | 0                                | 0                                | 2                           | 2,075.02                           | 2689                | 2707               | TRUE     |                |
| SNU216_PCL_03     | Isoform 1 of RNA-binding region-containing prot    | IP00163505,IP000215801     | 59,381.40                     | 99.80%                             | 2                         | 3                        | 3                       | 0.02%                       | 4.91%                        | DKSPVREFDNLTPFER                              | K                   | D               | 95.00%                                  | 2.98                     | 0.426                  | 0                                | 1                                | 1                                | 0                                | 2                           | 2,074.98                           | 134                 | 150                | TRUE     |                |
| SNU216_PCL_03     | Isoform 1 of RNA-binding region-containing prot    | IP00163505,IP000215801     | 59,381.40                     | 99.80%                             | 2                         | 3                        | 3                       | 0.02%                       | 4.91%                        | YRSPYSGPK                                     | R                   | F               | 95.00%                                  | 2.17                     | 0.172                  | 0                                | 1                                | 0                                | 0                                | 2                           | 1,134.50                           | 95                  | 103                | TRUE     |                |
| SNU216_PCL_03     | Isoform 4 of Interleukin enhancer-binding factor   | IP000418313                | 95,808.40                     | 100.00%                            | 2                         | 3                        | 5                       | 0.03%                       | 6.12%                        | GEDSAETTEAKPAVAVPAVVEAVTSPSAAI                | K                   | Q               | 95.00%                                  | 5.87                     | 0.5                    | 0                                | 0                                | 0                                | 1                                | 2                           | 4,118.93                           | 479                 | 519                | TRUE     |                |
| SNU216_PCL_03     | Isoform 4 of Interleukin enhancer-binding factor   | IP000418313                | 95,808.40                     | 100.00%                            | 2                         | 3                        | 5                       | 0.03%                       | 6.12%                        | RPMEEDGEEKSPSK                                | K                   | K               | 95.00%                                  | 3.77                     | 0.429                  | 0                                | 2                                | 2                                | 0                                | 2                           | 1,698.70                           | 372                 | 385                | TRUE     |                |
| SNU216_PCL_03     | retinoblastoma-associated factor 600               | IP000643014,IP000746934    | 573,842.50                    | 100.00%                            | 4                         | 6                        | 6                       | 0.04%                       | 1.14%                        | AAPPPPPPPPPPLESSPR                            | K                   | V               | 95.00%                                  | 3.39                     | 0.238                  | 0                                | 0                                | 1                                | 0                                | 2                           | 1,783.88                           | 606                 | 622                | TRUE     |                |
| SNU216_PCL_03     | retinoblastoma-associated factor 600               | IP000643014,IP000746934    | 573,842.50                    | 100.00%                            | 4                         | 6                        | 6                       | 0.04%                       | 1.14%                        | RHVTLPSSPR                                    | R                   | S               | 95.00%                                  | 3                        | 0.296                  | 0                                | 0                                | 1                                | 0                                | 2                           | 1,229.62                           | 2712                | 2721               | TRUE     |                |
| SNU216_PCL_03     | retinoblastoma-associated factor 600               | IP000643014,IP000746934    | 573,842.50                    | 100.00%                            | 4                         | 6                        | 6                       | 0.04%                       | 1.14%                        | SNTPMGDKDDDDDDDADEK                           | R                   | M               | 95.00%                                  | 5.1                      | 0.708                  | 0                                | 1                                | 1                                | 0                                | 2                           | 2,177.73                           | 2722                | 2740               | TRUE     |                |
| SNU216_PCL_03     | retinoblastoma-associated factor 600               | IP000643014,IP000746934    | 573,842.50                    | 100.00%                            | 4                         | 6                        | 6                       | 0.04%                       | 1.14%                        | SNTPMGDKDDDDDDDADEKMQSSGIPNC                  | R                   | Q               | 95.00%                                  | 2.65                     | 0.224                  | 0                                | 0                                | 0                                | 1                                | 2                           | 3,512.39                           | 2722                | 2753               | TRUE     |                |
| SNU216_PCL_03     | SerineW/arginine repetitive matrix 1               | IP000328293                | 103,392.70                    | 100.00%                            | 15                        | 22                       | 35                      | 0.22%                       | 17.60%                       | AASPSQSVR                                     | K                   | R               | 95.00%                                  | 2.02                     | 0.516                  | 1                                | 2                                | 0                                | 0                                | 2                           | 1,079.49                           | 745                 | 754                | TRUE     |                |
| SNU216_PCL_03     | SerineW/arginine repetitive matrix 1               | IP000328293                | 103,392.70                    | 100.00%                            | 15                        | 22                       | 35                      | 0.22%                       | 17.60%                       | AQQTSSPPVVR                                   | R                   | R               | 95.00%                                  | 2.65                     | 0.386                  | 0                                | 2                                | 0                                | 0                                | 2                           | 1,303.60                           | 699                 | 710                | TRUE     |                |
| SNU216_PCL_03     | SerineW/arginine repetitive matrix 1               | IP000328293                | 103,392.70                    | 100.00%                            | 15                        | 22                       | 35                      | 0.22%                       | 17.60%                       | EKTPELPEPSVK                                  | K                   | V               | 95.00%                                  | 2.48                     | 0.367                  | 0                                | 1                                | 0                                | 0                                | 2                           | 1,433.69                           | 218                 | 229                | TRUE     |                |
| SNU216_PCL_03     | SerineW/arginine repetitive matrix 1               | IP000328293                | 103,392.70                    | 100.00%                            | 15                        | 22                       | 35                      | 0.22%                       | 17.60%                       | HRPSPPTAPPPK                                  | R                   | T               | 95.00%                                  | 3                        | 0.393                  | 0                                | 0                                | 5                                | 0                                | 2                           | 1,441.64                           | 394                 | 405                | TRUE     |                |
| SNU216_PCL_03     | SerineW/arginine repetitive matrix 1               | IP000328293                | 103,392.70                    | 100.00%                            | 15                        | 22                       | 35                      | 0.22%                       | 17.60%                       | KEKTPELPEPSVK                                 | K                   | V               | 95.00%                                  | 2.73                     | 0.349                  | 0                                | 1                                | 1                                | 0                                | 2                           | 1,561.79                           | 217                 | 229                | TRUE     |                |
| SNU216_PCL_03     | SerineW/arginine repetitive matrix 1               | IP000328293                | 103,392.70                    | 100.00%                            | 15                        | 22                       | 35                      | 0.22%                       | 17.60%                       | KETESAEADNLDLEK                               | K                   | H               | 95.00%                                  | 4.8                      | 0.522                  | 0                                | 3                                | 2                                | 0                                | 2                           | 1,944.80                           | 879                 | 894                | TRUE     |                |
| SNU216_PCL_03     | SerineW/arginine repetitive matrix 1               | IP000328293                | 103,392.70                    | 100.00%                            | 15                        | 22                       | 35                      | 0.22%                       | 17.60%                       | KPPAPPSPVQSQSPSTNWSPAVPVK                     | K                   | K               | 95.00%                                  | 4.17                     | 0.276                  | 0                                | 0                                | 1                                | 0                                | 2                           | 2,663.32</                         |                     |                    |          |                |

Supplemental Table 2. A list of all phosphorylated peptides identified in SNU216 and SNU216-LR.

| MS/MS sample name | Protein name                                    | Protein accession numbers  | Protein molecular weight (Da) | Protein identification probability | Number of unique peptides | Number of unique spectra | Number of total spectra | Percentage of total spectra | Percentage sequence coverage | Peptide sequence                  | Previous amino acid | Next amino acid | Best Peptide identification probability | Best SEQUEST XCorr score | Best SEQUEST Dcn score | Number of identified +1H spectra | Number of identified +2H spectra | Number of identified +3H spectra | Number of identified +4H spectra | Number of enzymatic termini | Calculate d +1H Peptide Mass (AMU) | Peptide start index | Peptide stop index | Assigned | Other Proteins          |
|-------------------|-------------------------------------------------|----------------------------|-------------------------------|------------------------------------|---------------------------|--------------------------|-------------------------|-----------------------------|------------------------------|-----------------------------------|---------------------|-----------------|-----------------------------------------|--------------------------|------------------------|----------------------------------|----------------------------------|----------------------------------|----------------------------------|-----------------------------|------------------------------------|---------------------|--------------------|----------|-------------------------|
| SNU216_PCL_03     | Ribosome biogenesis protein BMS1 homolog        | IP00006099                 | 145,812.20                    | 100.00%                            | 2                         | 3                        | 3                       | 0.02%                       | 2.42%                        | LGPQNFIDETSDIENLLK                | K                   | E               | 95.00%                                  | 3.68                     | 0.407                  | 0                                | 1                                | 0                                | 0                                | 2                           | 2,126.01                           | 629                 | 646                | TRUE     |                         |
| SNU216_PCL_03     | Ribosome biogenesis protein BMS1 homolog        | IP00006099                 | 145,812.20                    | 100.00%                            | 2                         | 3                        | 3                       | 0.02%                       | 2.42%                        | LGPQNFIDETSDIENLLKEEDYKEENNDISK   | K                   | E               | 95.00%                                  | 5.62                     | 0.515                  | 0                                | 0                                | 1                                | 1                                | 2                           | 3,735.64                           | 629                 | 659                | TRUE     |                         |
| SNU216_PCL_03     | Isoform 1 of Roundabout homolog 1 precursor     | IP000219798,IP000418121,IP | 180,927.80                    | 99.80%                             | 2                         | 3                        | 3                       | 0.02%                       | 2.00%                        | KVPSFTFTVTYYQR                    | R                   | G               | 95.00%                                  | 3.29                     | 0.327                  | 0                                | 1                                | 1                                | 0                                | 2                           | 1,851.90                           | 937                 | 951                | TRUE     |                         |
| SNU216_PCL_03     | Isoform 1 of Roundabout homolog 1 precursor     | IP000219798,IP000418121,IP | 180,927.80                    | 99.80%                             | 2                         | 3                        | 3                       | 0.02%                       | 2.00%                        | PTSPVSTDSNMASVAMQK                | R                   | T               | 95.00%                                  | 3.33                     | 0.408                  | 0                                | 1                                | 0                                | 0                                | 2                           | 1,930.83                           | 1440                | 1457               | TRUE     |                         |
| SNU216_PCL_03     | RNA binding motif protein 25                    | IP000004273                | 100,189.10                    | 99.90%                             | 1                         | 1                        | 1                       | 0.01%                       | 1.66%                        | LIGASNSPGQNSVVK                   | K                   | R               | 95.00%                                  | 3.06                     | 0.372                  | 0                                | 1                                | 0                                | 0                                | 2                           | 1,435.66                           | 672                 | 685                | TRUE     |                         |
| SNU216_PCL_03     | Isoform 2 of Fanconi anemia group D2 protein    | IP000604399                | 164,133.80                    | 100.00%                            | 2                         | 2                        | 2                       | 0.01%                       | 2.55%                        | ATEDGEEDEVSAAGEK                  | K                   | E               | 95.00%                                  | 2.68                     | 0.293                  | 0                                | 1                                | 0                                | 0                                | 2                           | 1,645.61                           | 1425                | 1439               | TRUE     |                         |
| SNU216_PCL_03     | Isoform 2 of Fanconi anemia group D2 protein    | IP000604399                | 164,133.80                    | 100.00%                            | 2                         | 2                        | 2                       | 0.01%                       | 2.55%                        | SQNSQESTADESDDMSSQASK             | K                   | S               | 95.00%                                  | 4.31                     | 0.169                  | 0                                | 1                                | 0                                | 0                                | 2                           | 2,440.89                           | 1401                | 1422               | TRUE     |                         |
| SNU216_PCL_03     | SCC-112 protein                                 | IP000303063                | 150,835.50                    | 99.80%                             | 1                         | 1                        | 1                       | 0.01%                       | 1.27%                        | AAVGQESPGLEAGNAK                  | R                   | A               | 95.00%                                  | 3.06                     | 0.426                  | 0                                | 1                                | 0                                | 0                                | 2                           | 1,635.74                           | 1299                | 1315               | TRUE     |                         |
| SNU216_PCL_03     | Isoform 2 of InaD-like protein                  | IP00170791                 | 173,811.70                    | 99.00%                             | 2                         | 2                        | 2                       | 0.01%                       | 1.39%                        | LFDDAEASVDEPR                     | R                   | R               | 79.80%                                  | 2.19                     | 0.159                  | 0                                | 1                                | 0                                | 0                                | 2                           | 1,472.59                           | 639                 | 650                | TRUE     |                         |
| SNU216_PCL_03     | Isoform 2 of InaD-like protein                  | IP00170791                 | 173,811.70                    | 99.00%                             | 2                         | 2                        | 2                       | 0.01%                       | 1.39%                        | VPDSPENELK                        | K                   | S               | 95.00%                                  | 2.39                     | 0.327                  | 0                                | 1                                | 0                                | 0                                | 2                           | 1,207.52                           | 519                 | 528                | TRUE     |                         |
| SNU216_PCL_03     | Rho GTPase activating protein 21                | IP00169307                 | 217,333.80                    | 100.00%                            | 3                         | 3                        | 3                       | 0.02%                       | 2.55%                        | SKSYDEGLDDYREDAK                  | R                   | L               | 95.00%                                  | 3.59                     | 0.295                  | 0                                | 1                                | 0                                | 0                                | 2                           | 1,970.80                           | 878                 | 893                | TRUE     |                         |
| SNU216_PCL_03     | Rho GTPase activating protein 21                | IP00169307                 | 217,333.80                    | 100.00%                            | 3                         | 3                        | 3                       | 0.02%                       | 2.55%                        | TQSPHSPKKEESR                     | K                   | K               | 95.00%                                  | 3.26                     | 0.441                  | 0                                | 0                                | 1                                | 0                                | 2                           | 1,591.67                           | 1093                | 1105               | TRUE     |                         |
| SNU216_PCL_03     | Rho GTPase activating protein 21                | IP00169307                 | 217,333.80                    | 100.00%                            | 3                         | 3                        | 3                       | 0.02%                       | 2.55%                        | TTSPPLSIPTHLIHQPAGSR              | R                   | S               | 95.00%                                  | 3.98                     | 0.4                    | 0                                | 0                                | 1                                | 0                                | 2                           | 2,291.15                           | 316                 | 336                | TRUE     |                         |
| SNU216_PCL_03     | Isoform 1 of Spectrin beta chain, brain 2       | IP00012645                 | 271,295.80                    | 100.00%                            | 2                         | 3                        | 4                       | 0.02%                       | 1.05%                        | LEHSSFPEGPGSGDDEANGPR             | R                   | G               | 95.00%                                  | 5.43                     | 0.532                  | 0                                | 1                                | 2                                | 0                                | 2                           | 2,273.95                           | 2158                | 2179               | TRUE     |                         |
| SNU216_PCL_03     | Isoform 1 of Spectrin beta chain, brain 2       | IP00012645                 | 271,295.80                    | 100.00%                            | 2                         | 3                        | 4                       | 0.02%                       | 1.05%                        | LEHSSFPEGPGSGDDEANGPRGR           | R                   | Q               | 95.00%                                  | 3.28                     | 0.275                  | 0                                | 0                                | 1                                | 0                                | 2                           | 2,616.11                           | 2158                | 2182               | TRUE     |                         |
| SNU216_PCL_03     | Isoform Beta-4A of Integrin beta-4 precursor    | IP000220845,IP000220847    | 194,448.80                    | 100.00%                            | 1                         | 1                        | 1                       | 0.01%                       | 1.14%                        | MTTTSAAAVGTHLSPHVPHR              | R                   | V               | 81.10%                                  | 2.81                     | 0.152                  | 0                                | 0                                | 1                                | 0                                | 2                           | 2,215.01                           | 1391                | 1410               | TRUE     |                         |
| SNU216_PCL_03     | CRSP complex subunit 2                          | IP000297191                | 160,666.50                    | 99.80%                             | 2                         | 3                        | 3                       | 0.02%                       | 3.99%                        | MPGMSPANPSLHSPVPDASHSPR           | R                   | A               | 95.00%                                  | 2.83                     | 0.264                  | 0                                | 0                                | 1                                | 0                                | 2                           | 2,529.05                           | 1124                | 1146               | TRUE     |                         |
| SNU216_PCL_03     | CRSP complex subunit 2                          | IP000297191                | 160,666.50                    | 99.80%                             | 2                         | 3                        | 3                       | 0.02%                       | 3.99%                        | SVNEDDNPSPISGDDMMDSLSQLQPPFQI     | R                   | Q               | 95.00%                                  | 3.14                     | 0.18                   | 0                                | 0                                | 1                                | 1                                | 2                           | 3,883.76                           | 977                 | 1011               | TRUE     |                         |
| SNU216_PCL_03     | Isoform 1 of Chromodomain helicase-DNA-bindir   | IP000373870,IP000465222    | 231,367.10                    | 100.00%                            | 6                         | 6                        | 7                       | 0.04%                       | 5.50%                        | EKSESGSEYGTGPGR                   | R                   | K               | 95.00%                                  | 2.73                     | 0.431                  | 0                                | 1                                | 0                                | 0                                | 2                           | 1,757.64                           | 131                 | 146                | TRUE     |                         |
| SNU216_PCL_03     | Isoform 1 of Chromodomain helicase-DNA-bindir   | IP000373870,IP000465222    | 231,367.10                    | 100.00%                            | 6                         | 6                        | 7                       | 0.04%                       | 5.50%                        | LGQDGGPSPPTNDPTVK                 | K                   | Y               | 95.00%                                  | 4.6                      | 0.487                  | 0                                | 1                                | 0                                | 0                                | 2                           | 1,918.84                           | 749                 | 766                | TRUE     |                         |
| SNU216_PCL_03     | Isoform 1 of Chromodomain helicase-DNA-bindir   | IP000373870,IP000465222    | 231,367.10                    | 100.00%                            | 6                         | 6                        | 7                       | 0.04%                       | 5.50%                        | GGSYVFQSDGPEPEAEESDLDSGSVHSAS     | K                   | T               | 95.00%                                  | 5.39                     | 0.212                  | 0                                | 0                                | 1                                | 2                                | 3,983.68                    | 351                                | 388                 | TRUE               |          |                         |
| SNU216_PCL_03     | Isoform 1 of Chromodomain helicase-DNA-bindir   | IP000373870,IP000465222    | 231,367.10                    | 100.00%                            | 6                         | 6                        | 7                       | 0.04%                       | 5.50%                        | KGGSYVFQSDGPEPEAEESDLDSGSVHSAS    | K                   | T               | 95.00%                                  | 6.27                     | 0.0926                 | 0                                | 0                                | 1                                | 2                                | 4,111.78                    | 350                                | 388                 | TRUE               |          |                         |
| SNU216_PCL_03     | Isoform 1 of Chromodomain helicase-DNA-bindir   | IP000373870,IP000465222    | 231,367.10                    | 100.00%                            | 6                         | 6                        | 7                       | 0.04%                       | 5.50%                        | KNDMDPEPPLDYGSGEDDGK              | R                   | S               | 95.00%                                  | 4.12                     | 0.348                  | 0                                | 0                                | 1                                | 0                                | 2                           | 2,258.88                           | 629                 | 648                | TRUE     |                         |
| SNU216_PCL_03     | Isoform 1 of Chromodomain helicase-DNA-bindir   | IP000373870,IP000465222    | 231,367.10                    | 100.00%                            | 6                         | 6                        | 7                       | 0.04%                       | 5.50%                        | METEAADAPSAPSLGR                  | K                   | L               | 95.00%                                  | 3.38                     | 0.546                  | 0                                | 2                                | 0                                | 0                                | 2                           | 1,933.73                           | 1638                | 1654               | TRUE     |                         |
| SNU216_PCL_03     | Zinc finger CCHH-type domain-containing proteir | IP00187011                 | 140,259.60                    | 99.80%                             | 2                         | 2                        | 3                       | 0.02%                       | 2.84%                        | EYSYPVAPSHQQVPPSHATPLPK           | R                   | K               | 95.00%                                  | 2.67                     | 0.211                  | 0                                | 0                                | 1                                | 0                                | 2                           | 2,672.22                           | 157                 | 179                | TRUE     |                         |
| SNU216_PCL_03     | Zinc finger CCHH-type domain-containing proteir | IP00187011                 | 140,259.60                    | 99.80%                             | 2                         | 2                        | 3                       | 0.02%                       | 2.84%                        | TGSGSPFAGNSPAR                    | K                   | E               | 95.00%                                  | 2.38                     | 0.322                  | 0                                | 0                                | 0                                | 2                                | 1,465.55                    | 1265                               | 1278                | TRUE               |          |                         |
| SNU216_PCL_03     | Serine/threonine-protein kinase MRCK gamma      | IP000454910                | 172,520.90                    | 100.00%                            | 2                         | 2                        | 2                       | 0.01%                       | 2.19%                        | GSGPQRPHFSFEALR                   | R                   | R               | 95.00%                                  | 2.51                     | 0.288                  | 0                                | 0                                | 1                                | 0                                | 2                           | 1,705.78                           | 1474                | 1488               | TRUE     |                         |
| SNU216_PCL_03     | Serine/threonine-protein kinase MRCK gamma      | IP000454910                | 172,520.90                    | 100.00%                            | 2                         | 2                        | 2                       | 0.01%                       | 2.19%                        | RPASMGSEGLGGDADPMKMR              | R                   | K               | 95.00%                                  | 3.94                     | 0.306                  | 0                                | 0                                | 1                                | 0                                | 2                           | 2,011.87                           | 1489                | 1507               | TRUE     |                         |
| SNU216_PCL_03     | Isoform 1 of AP-3 complex subunit beta-1        | IP000021129                | 121,354.00                    | 100.00%                            | 2                         | 2                        | 2                       | 0.01%                       | 2.01%                        | EGDEEDNKGKFNYESDDQKEK             | K                   | T               | 94.50%                                  | 2.92                     | 0.163                  | 0                                | 0                                | 1                                | 0                                | 2                           | 2,684.05                           | 262                 | 283                | TRUE     |                         |
| SNU216_PCL_03     | Isoform 1 of AP-3 complex subunit beta-1        | IP000021129                | 121,354.00                    | 100.00%                            | 2                         | 2                        | 2                       | 0.01%                       | 2.01%                        | NFYESDDQKEK                       | K                   | T               | 95.00%                                  | 2.11                     | 0.211                  | 0                                | 0                                | 1                                | 0                                | 2                           | 1,597.61                           | 272                 | 283                | TRUE     |                         |
| SNU216_PCL_03     | Eukaryotic translation initiation factor 4B     | IP00012079                 | 69,226.80                     | 100.00%                            | 2                         | 2                        | 2                       | 0.01%                       | 5.40%                        | SQSSDTEQQTSGPTSGGGK               | R                   | V               | 95.00%                                  | 3.39                     | 0.532                  | 0                                | 1                                | 0                                | 0                                | 2                           | 1,760.70                           | 495                 | 511                | TRUE     |                         |
| SNU216_PCL_03     | Eukaryotic translation initiation factor 4B     | IP00012079                 | 69,226.80                     | 100.00%                            | 2                         | 2                        | 2                       | 0.01%                       | 5.40%                        | TGSESSQGTSTTSR                    | R                   | N               | 86.70%                                  | 3.2                      | 0.042                  | 0                                | 1                                | 0                                | 0                                | 2                           | 1,653.66                           | 420                 | 435                | TRUE     |                         |
| SNU216_PCL_03     | Isoform 2 of HECT, UBA and WWE domain-conta     | IP000445401,IP000456919,IP | 481,019.20                    | 100.00%                            | 13                        | 16                       | 19                      | 0.12%                       | 5.64%                        | AGSSTPGDPAVPAVEVQGR               | R                   | S               | 95.00%                                  | 3.84                     | 0.394                  | 0                                | 1                                | 1                                | 0                                | 2                           | 1,846.83                           | 2876                | 2894               | TRUE     |                         |
| SNU216_PCL_03     | Isoform 2 of HECT, UBA and WWE domain-conta     | IP000445401,IP000456919,IP | 481,019.20                    | 100.00%                            | 13                        | 16                       | 19                      | 0.12%                       | 5.64%                        | DGGSGNCTIVSR                      | R                   | S               | 95.00%                                  | 2.69                     | 0.479                  | 0                                | 2                                | 0                                | 0                                | 2                           | 1,422.57                           | 2350                | 2362               | TRUE     |                         |
| SNU216_PCL_03     | Isoform 2 of HECT, UBA and WWE domain-conta     | IP000445401,IP000456919,IP | 481,019.20                    | 100.00%                            | 13                        | 16                       | 19                      | 0.12%                       | 5.64%                        | DLMSSEEDQMRR                      | R                   | A               | 95.00%                                  | 2.51                     | 0.463                  | 0                                | 1                                | 0                                | 0                                | 2                           | 1,551.55                           | 1357                | 1368               | TRUE     |                         |
| SNU216_PCL_03     | Isoform 2 of HECT, UBA and WWE domain-conta     | IP000445401,IP000456919,IP | 481,019.20                    | 100.00%                            | 13                        | 16                       | 19                      | 0.12%                       | 5.64%                        | EQSLAHKIDPEPPLSPAPRLPATPSSLDPFFSF | R                   | E               | 95.00%                                  | 5.75                     | 0.287                  | 0                                | 0                                | 1                                | 1                                | 2                           | 3,622.78                           | 3896                | 3928               | TRUE     |                         |
| SNU216_PCL_03     | Isoform 2 of HECT, UBA and WWE domain-conta     | IP000445401,IP000456919,IP | 481,019.20                    | 100.00%                            | 13                        | 16                       | 19                      | 0.12%                       | 5.64%                        | GGCTASDDEFENLR                    | R                   | I               | 95.00%                                  | 3.13                     | 0.51                   | 0                                | 2                                | 0                                | 0                                | 2                           | 1,577.61                           | 1893                | 1906               | TRUE     |                         |
| SNU216_PCL_03     | Isoform 2 of HECT, UBA and WWE domain-conta     | IP000445401,IP000456919,IP | 481,019.20                    | 100.00%                            | 13                        | 16                       | 19                      | 0.12%                       | 5.64%                        | HADHSLSLTSGSGSSTR                 | R                   | L               | 94.70%                                  | 2.92                     | 0.164                  | 0                                | 0                                | 1                                | 0                                | 2                           | 1,793.78                           | 2513                | 2529               | TRUE     |                         |
| SNU216_PCL_03     | Isoform 2 of HECT, UBA and WWE domain-conta     | IP000445401,IP000456919,IP | 481,019.20                    | 100.00%                            | 13                        | 16                       | 19                      | 0.12%                       | 5.64%                        | LGSSGLGSSASSIQAIVR                | R                   | Q               | 95.00%                                  | 2.45                     | 0.206                  | 0                                | 1                                | 0                                | 0                                | 2                           | 1,640.80                           | 3741                | 3757               | TRUE     |                         |
| SNU216_PCL_03     | Isoform 2 of HECT, UBA and WWE domain-conta     | IP000445401,IP000456919,IP | 481,019.20                    | 100.00%                            | 13                        | 16                       | 19                      | 0.12%                       | 5.64%                        | LLGPSAAADILQSSSLPLQSR             | R                   | G               | 95.00%                                  | 3.21                     | 0.398                  | 0                                | 0                                | 1                                | 0                                | 2                           | 2,317.22                           | 2571                | 2592               | TRUE     |                         |
| SNU216_PCL_03     | Isoform 2 of HECT, UBA and WWE domain-conta     | IP000445401,IP000456919,IP | 481,019.20                    | 100.00%                            | 13                        | 16                       | 19                      | 0.12%                       | 5.64%                        | KEESPMMDVQDQSPSPAQDTQSIASDGT PQGI | R                   | E               | 95.00%                                  | 5.93                     | 0.125                  | 0                                | 0                                | 2                                | 1                                | 2                           | 3,447.39                           | 3796                | 3826               | TRUE     |                         |
| SNU216_PCL_03     | Isoform 2 of HECT, UBA and WWE domain-conta     | IP000445401,IP000456919,IP | 481,019.20                    | 100.00%                            | 13                        | 16                       | 19                      | 0.12%                       | 5.64%                        | RSSDPLGDTASNLGSAVDLMR             | R                   | H               | 95.00%                                  | 5.04                     | 0.482                  | 0                                | 0                                | 1                                | 0                                | 2                           | 2,527.16                           | 646                 | 668                | TRUE     |                         |
| SNU216_PCL_03     | Isoform 2 of HECT, UBA and WWE domain-conta     | IP000445401,IP000456919,IP | 481,019.20                    | 100.00%                            | 13                        | 16                       | 19                      | 0.12%                       | 5.64%                        | RSSDPLGDTASNLGSAVDLMR             | R                   | H               | 95.00%                                  | 4.71                     | 0.518                  | 0                                | 0                                | 1                                | 0                                | 2                           | 2,371.06                           | 647                 | 668                | TRUE     |                         |
| SNU216_PCL_03     | Isoform 2 of HECT, UBA and WWE domain-conta     | IP000445401,IP000456919,IP | 481,019.20                    | 100.00%                            | 13                        | 16                       | 19                      | 0.12%                       | 5.64%                        | SDEDESQEDVLMDAPSNLSQASTLQANR      | R                   | E               | 95.00%                                  | 5.01                     | 0.488                  | 0                                | 0                                | 1                                | 0                                | 2                           | 3,201.35                           | 2363                | 2391               | TRUE     |                         |
| SNU216_PCL_03     | Isoform 2 of HECT, UBA and WWE domain-conta     | IP000445401,IP000456919,IP | 481,019.20                    | 100.00%                            | 13                        | 16                       | 19                      | 0.12%                       | 5.64%                        | SHHAASITTTAPTPAAR                 | R                   | S               | 95.00%                                  | 2.69                     | 0.444                  | 0                                | 1                                | 0                                | 0                                | 2                           | 1,656.75                           | 1075                | 1090               | TRUE     |                         |
| SNU216_PCL_03     | plectin 1 isoform 11                            | IP000398779                | 516,193.30                    | 100.00%                            | 3                         | 4                        | 5                       | 0.03%                       | 2.75%                        | AGTLSTTEFADMLSGNAGFRSR            | R                   | S               | 95.00%                                  | 3.92                     | 0.506                  | 0                                | 1                                | 1                                | 0                                | 2                           | 2,438.12                           | 4224                | 4246               | FALSE    | IP000398002,IP000186711 |
| SNU216_PCL_03     | plectin 1 isoform 11                            | IP000398779                | 516,193.30                    | 100.00%                            | 3                         | 4                        | 5                       | 0.03%                       | 2.75%                        | AQLEPVASPAK                       | K                   | K               | 95.00%                                  | 2.2                      | 0.273                  | 1                                | 0                                | 0                                | 0                                | 2                           | 1,190.58                           | 1291                | 1301               | FALSE    | IP000398002,IP000186711 |
| SNU216_PCL_03     | plectin 1 isoform 11                            | IP000398779                | 516,193.30                    | 100.00%                            | 3                         | 4                        | 5                       | 0.03%                       | 2.75%                        | ARSDGQLSPATR                      | R                   | G               | 95.00%                                  | 3.33                     | 0.408                  | 0                                | 0                                | 1                                | 0                                | 2                           | 1,467.66                           | 575                 | 587                | FALSE    | IP000398002,IP000186711 |
| SNU216_PCL_03     | plectin 1 isoform 11                            | IP000398779                | 516,193.30                    | 100.00%                            | 3                         | 4                        | 5                       | 0.03%                       | 2.75%                        | GYSPYSVSGSGSTAGSR                 | K                   | T               | 95.00%                                  | 3.54                     | 0.057                  | 0                                | 3                                | 0                                | 0                                | 2                           | 1,862.76                           | 4473                | 4490               | FALSE    | IP000398002,IP000186711 |
| SNU216_PCL_03     | plectin 1 isoform 11                            | IP000398779                | 516,193.30                    | 100.00%                            | 3                         | 4                        | 5                       | 0.03%                       | 2.75%                        |                                   |                     |                 |                                         |                          |                        |                                  |                                  |                                  |                                  |                             |                                    |                     |                    |          |                         |

Supplemental Table 2. List of all phosphorylated peptides identified in SNU216 and SNU216-LR.

| MS/MS sample name | Protein name                                        | Protein accession numbers | Protein molecular weight (Da) | Protein identification probability | Number of unique peptides | Number of unique spectra | Number of total spectra | Percentage of total spectra | Percentage sequence coverage | Peptide sequence                 | Previous amino acid | Next amino acid | Best Peptide identification probability | Best SEQUEST XCorr score | Best SEQUEST Dcn score | Number of identified +1H spectra | Number of identified +2H spectra | Number of identified +3H spectra | Number of identified +4H spectra | Number of enzymatic termini | Calculate d +1H Peptide Mass (AMU) | Peptide start index | Peptide stop index | Assigned | Other Proteins |
|-------------------|-----------------------------------------------------|---------------------------|-------------------------------|------------------------------------|---------------------------|--------------------------|-------------------------|-----------------------------|------------------------------|----------------------------------|---------------------|-----------------|-----------------------------------------|--------------------------|------------------------|----------------------------------|----------------------------------|----------------------------------|----------------------------------|-----------------------------|------------------------------------|---------------------|--------------------|----------|----------------|
| SNU216_PCL_03     | Rho GTPase activating protein 5 isoform a           | IP000646885               | 172,464.90                    | 100.00%                            | 5                         | 7                        | 8                       | 0.05%                       | 3.40%                        | GGIDNPATISDQELDDKK               | K                   | M               | 95.00%                                  | 4.28                     | 0.344                  | 0                                | 1                                | 0                                | 2                                | 1,995.89                    | 1209                               | 1226                | TRUE               |          |                |
| SNU216_PCL_03     | Rho GTPase activating protein 5 isoform a           | IP000646885               | 172,464.90                    | 100.00%                            | 5                         | 7                        | 8                       | 0.05%                       | 3.40%                        | HRGSEEDPLLSVPETWK                | R                   | G               | 95.00%                                  | 4.13                     | 0.389                  | 0                                | 0                                | 1                                | 0                                | 2                           | 2,059.95                           | 1192                | 1208               | TRUE     |                |
| SNU216_PCL_03     | Rho GTPase activating protein 5 isoform a           | IP000646885               | 172,464.90                    | 100.00%                            | 5                         | 7                        | 8                       | 0.05%                       | 3.40%                        | RTHSDASDDEAFTTSK                 | R                   | T               | 95.00%                                  | 3.75                     | 0.447                  | 0                                | 1                                | 2                                | 0                                | 2                           | 1,847.74                           | 1170                | 1185               | TRUE     |                |
| SNU216_PCL_03     | Rho GTPase activating protein 5 isoform a           | IP000646885               | 172,464.90                    | 100.00%                            | 5                         | 7                        | 8                       | 0.05%                       | 3.40%                        | THSDASDDEAFTTSK                  | R                   | T               | 95.00%                                  | 2.58                     | 0.477                  | 0                                | 1                                | 0                                | 0                                | 2                           | 1,771.61                           | 1171                | 1185               | TRUE     |                |
| SNU216_PCL_03     | ATP-dependent RNA helicase DDX24                    | IP00006987                | 96,334.70                     | 100.00%                            | 5                         | 6                        | 7                       | 0.04%                       | 6.05%                        | AQAVSEEEEEEGK                    | K                   | S               | 95.00%                                  | 2.84                     | 0.35                   | 0                                | 1                                | 0                                | 0                                | 2                           | 1,643.63                           | 78                  | 91                 | TRUE     |                |
| SNU216_PCL_03     | ATP-dependent RNA helicase DDX24                    | IP00006987                | 96,334.70                     | 100.00%                            | 5                         | 6                        | 7                       | 0.04%                       | 6.05%                        | AQAVSEEEEEEGKSSSPK               | K                   | K               | 95.00%                                  | 4.73                     | 0.503                  | 0                                | 2                                | 1                                | 0                                | 2                           | 2,129.88                           | 78                  | 96                 | TRUE     |                |
| SNU216_PCL_03     | ATP-dependent RNA helicase DDX24                    | IP00006987                | 96,334.70                     | 100.00%                            | 5                         | 6                        | 7                       | 0.04%                       | 6.05%                        | KAQAVSEEEEEEGK                   | R                   | S               | 95.00%                                  | 2.84                     | 0.308                  | 0                                | 1                                | 0                                | 0                                | 2                           | 1,771.73                           | 77                  | 91                 | TRUE     |                |
| SNU216_PCL_03     | ATP-dependent RNA helicase DDX24                    | IP00006987                | 96,334.70                     | 100.00%                            | 5                         | 6                        | 7                       | 0.04%                       | 6.05%                        | KAQAVSEEEEEEGKSSSPK              | R                   | K               | 95.00%                                  | 3.29                     | 0.241                  | 0                                | 0                                | 1                                | 0                                | 2                           | 2,257.97                           | 77                  | 96                 | TRUE     |                |
| SNU216_PCL_03     | ATP-dependent RNA helicase DDX24                    | IP00006987                | 96,334.70                     | 100.00%                            | 5                         | 6                        | 7                       | 0.04%                       | 6.05%                        | SPGKAEAESDALPDDTVIESEALPSDIAAEAR | R                   | A               | 95.00%                                  | 4.84                     | 0.462                  | 0                                | 0                                | 1                                | 0                                | 2                           | 3,334.52                           | 287                 | 318                | TRUE     |                |
| SNU216_PCL_03     | Isoform 1 of Chromodomain helicase-DNA-bindir       | IP00000846,IP004455210    | 220,837.90                    | 100.00%                            | 2                         | 2                        | 3                       | 0.02%                       | 0.58%                        | KMSQPGSPSPK                      | K                   | T               | 95.00%                                  | 2.73                     | 0.319                  | 0                                | 1                                | 0                                | 0                                | 2                           | 1,303.52                           | 1557                | 1567               | TRUE     |                |
| SNU216_PCL_03     | Isoform 1 of Chromodomain helicase-DNA-bindir       | IP00000846,IP004455210    | 220,837.90                    | 100.00%                            | 2                         | 2                        | 3                       | 0.02%                       | 0.58%                        | MSQPGSPSPK                       | K                   | T               | 95.00%                                  | 1.81                     | 0.322                  | 0                                | 2                                | 0                                | 0                                | 2                           | 1,175.42                           | 1558                | 1567               | TRUE     |                |
| SNU216_PCL_03     | Retinoblastoma-associated protein RAP140            | IP00038698                | 139,957.70                    | 100.00%                            | 3                         | 3                        | 3                       | 0.02%                       | 5.52%                        | EPVEETTKSPSDVNISAQPSALNSFISQLEPV | R                   | I               | 93.90%                                  | 6.12                     | 0.0233                 | 0                                | 0                                | 1                                | 0                                | 2                           | 4,224.06                           | 748                 | 785                | TRUE     |                |
| SNU216_PCL_03     | Retinoblastoma-associated protein RAP140            | IP00038698                | 139,957.70                    | 100.00%                            | 3                         | 3                        | 3                       | 0.02%                       | 5.52%                        | LPITGNGNARSPEQQLGK               | K                   | H               | 95.00%                                  | 3.14                     | 0.402                  | 0                                | 1                                | 0                                | 0                                | 2                           | 1,945.97                           | 521                 | 538                | TRUE     |                |
| SNU216_PCL_03     | Retinoblastoma-associated protein RAP140            | IP00038698                | 139,957.70                    | 100.00%                            | 3                         | 3                        | 3                       | 0.02%                       | 5.52%                        | SVGGDSDTEDMR                     | K                   | S               | 95.00%                                  | 1.82                     | 0.377                  | 0                                | 1                                | 0                                | 0                                | 2                           | 1,348.47                           | 298                 | 309                | TRUE     |                |
| SNU216_PCL_03     | Eukaryotic translation initiation factor 4E nuclear | IP000291800,IP00414095,IP | 105,551.30                    | 99.80%                             | 1                         | 1                        | 1                       | 0.01%                       | 1.60%                        | APSPQLSQVFQTR                    | R                   | A               | 95.00%                                  | 2.27                     | 0.219                  | 0                                | 1                                | 0                                | 0                                | 2                           | 1,507.73                           | 538                 | 550                | TRUE     |                |
| SNU216_PCL_03     | Tyrosine-protein phosphatase non-receptor type      | IP00004388                | 133,288.70                    | 99.80%                             | 2                         | 2                        | 2                       | 0.01%                       | 2.64%                        | HLVISSNPDLTR                     | R                   | R               | 95.00%                                  | 2.74                     | 0.372                  | 0                                | 1                                | 0                                | 0                                | 2                           | 1,695.81                           | 584                 | 597                | TRUE     |                |
| SNU216_PCL_03     | Tyrosine-protein phosphatase non-receptor type      | IP00004388                | 133,288.70                    | 99.80%                             | 2                         | 2                        | 2                       | 0.01%                       | 2.64%                        | RNSIEVAGLSHGLEGR                 | K                   | L               | 95.00%                                  | 3.8                      | 0.412                  | 0                                | 0                                | 1                                | 0                                | 2                           | 1,887.94                           | 635                 | 651                | TRUE     |                |
| SNU216_PCL_03     | Talin-1                                             | IP000298994               | 271,170.80                    | 100.00%                            | 3                         | 3                        | 3                       | 0.02%                       | 0.94%                        | DHFGLEGDEESTMLEDSVSPK            | K                   | K               | 95.00%                                  | 3.91                     | 0.305                  | 0                                | 0                                | 1                                | 0                                | 2                           | 2,401.97                           | 407                 | 427                | TRUE     |                |
| SNU216_PCL_03     | Talin-1                                             | IP000298994               | 271,170.80                    | 100.00%                            | 3                         | 3                        | 3                       | 0.02%                       | 0.94%                        | SKDHFGLEGDEESTMLEDSVSPK          | K                   | K               | 95.00%                                  | 6.2                      | 0.459                  | 0                                | 0                                | 1                                | 0                                | 2                           | 2,617.10                           | 405                 | 427                | TRUE     |                |
| SNU216_PCL_03     | Talin-1                                             | IP000298994               | 271,170.80                    | 100.00%                            | 3                         | 3                        | 3                       | 0.02%                       | 0.94%                        | SKDHFGLEGDEESTMLEDSVSPK          | K                   | S               | 95.00%                                  | 4.37                     | 0.106                  | 0                                | 0                                | 0                                | 1                                | 2                           | 2,745.20                           | 405                 | 428                | TRUE     |                |
| SNU216_PCL_03     | Isoform 3 of Pumilio homolog 2                      | IP00022184,IP00398749     | 114,004.80                    | 99.40%                             | 2                         | 2                        | 2                       | 0.01%                       | 2.07%                        | GKASPFEEQDNR                     | K                   | D               | 88.20%                                  | 1.91                     | 0.222                  | 0                                | 1                                | 0                                | 0                                | 2                           | 1,457.61                           | 133                 | 144                | TRUE     |                |
| SNU216_PCL_03     | Isoform 3 of Pumilio homolog 2                      | IP00022184,IP00398749     | 114,004.80                    | 99.40%                             | 2                         | 2                        | 2                       | 0.01%                       | 2.07%                        | QASPTVEVR                        | R                   | L               | 95.00%                                  | 2.39                     | 0.188                  | 0                                | 1                                | 0                                | 0                                | 2                           | 1,195.54                           | 180                 | 189                | TRUE     |                |
| SNU216_PCL_03     | DNA-repair protein XRCC1                            | IP00002564                | 69,525.80                     | 100.00%                            | 3                         | 3                        | 3                       | 0.02%                       | 8.06%                        | AGISTSKPQESPK                    | R                   | G               | 95.00%                                  | 2.1                      | 0.266                  | 0                                | 1                                | 0                                | 0                                | 2                           | 1,409.67                           | 231                 | 243                | TRUE     |                |
| SNU216_PCL_03     | DNA-repair protein XRCC1                            | IP00002564                | 69,525.80                     | 100.00%                            | 3                         | 3                        | 3                       | 0.02%                       | 8.06%                        | TKPTQAAGSPSPQKPTPEETK            | K                   | A               | 94.70%                                  | 2.73                     | 0.19                   | 0                                | 0                                | 1                                | 0                                | 2                           | 2,437.11                           | 437                 | 458                | TRUE     |                |
| SNU216_PCL_03     | zinc finger protein 265 isoform 2                   | IP00183794                | 36,319.20                     | 100.00%                            | 2                         | 3                        | 3                       | 0.02%                       | 12.50%                       | ENVEYIERESDGEYDEFGR              | R                   | K               | 81.60%                                  | 2.68                     | 0.142                  | 0                                | 0                                | 1                                | 0                                | 2                           | 2,545.00                           | 100                 | 129                | TRUE     |                |
| SNU216_PCL_03     | zinc finger protein 265 isoform 2                   | IP00183794                | 36,319.20                     | 100.00%                            | 2                         | 3                        | 3                       | 0.02%                       | 12.50%                       | EVEDKESEGEEDDEDLSK               | K                   | Y               | 95.00%                                  | 4.66                     | 0.652                  | 0                                | 1                                | 1                                | 0                                | 2                           | 2,419.90                           | 147                 | 166                | TRUE     |                |
| SNU216_PCL_03     | PREDICTED: EH domain binding protein 1-like 1       | IP000296421,IP00744900    | 161,851.80                    | 100.00%                            | 4                         | 4                        | 4                       | 0.02%                       | 5.65%                        | ANEAGGQVGPEAPRPPTSPEMR           | R                   | S               | 95.00%                                  | 3.46                     | 0.207                  | 0                                | 0                                | 1                                | 0                                | 2                           | 2,457.09                           | 267                 | 289                | TRUE     |                |
| SNU216_PCL_03     | PREDICTED: EH domain binding protein 1-like 1       | IP000296421,IP00744900    | 161,851.80                    | 100.00%                            | 4                         | 4                        | 4                       | 0.02%                       | 5.65%                        | KGSDALRPVPVQGEDEVPK              | R                   | A               | 95.00%                                  | 4.06                     | 0.207                  | 0                                | 0                                | 1                                | 0                                | 2                           | 2,099.02                           | 308                 | 326                | TRUE     |                |
| SNU216_PCL_03     | PREDICTED: EH domain binding protein 1-like 1       | IP000296421,IP00744900    | 161,851.80                    | 100.00%                            | 4                         | 4                        | 4                       | 0.02%                       | 5.65%                        | LRPSVNGEGPSVPPPR                 | R                   | A               | 95.00%                                  | 3.04                     | 0.265                  | 0                                | 0                                | 1                                | 0                                | 2                           | 1,894.96                           | 1253                | 1269               | TRUE     |                |
| SNU216_PCL_03     | PREDICTED: EH domain binding protein 1-like 1       | IP000296421,IP00744900    | 161,851.80                    | 100.00%                            | 4                         | 4                        | 4                       | 0.02%                       | 5.65%                        | PSDVGNLDFDAESDEDEAHGGAPEAR       | K                   | A               | 95.00%                                  | 4.79                     | 0.55                   | 0                                | 0                                | 1                                | 0                                | 2                           | 2,877.15                           | 179                 | 205                | TRUE     |                |
| SNU216_PCL_03     | Ubiquitin carboxyl-terminal hydrolase 24            | IP000398505               | 294,371.70                    | 100.00%                            | 3                         | 4                        | 4                       | 0.02%                       | 1.72%                        | HLQQSGSESPMIGELR                 | R                   | S               | 95.00%                                  | 3.26                     | 0.333                  | 0                                | 0                                | 0                                | 2                                | 1,892.84                    | 2597                               | 2612                | TRUE               |          |                |
| SNU216_PCL_03     | Ubiquitin carboxyl-terminal hydrolase 24            | IP000398505               | 294,371.70                    | 100.00%                            | 3                         | 4                        | 4                       | 0.02%                       | 1.72%                        | TISAQDTLAYATALLNEK               | R                   | E               | 95.00%                                  | 3.27                     | 0.411                  | 0                                | 1                                | 1                                | 0                                | 2                           | 2,002.97                           | 2559                | 2576               | TRUE     |                |
| SNU216_PCL_03     | Ubiquitin carboxyl-terminal hydrolase 24            | IP000398505               | 294,371.70                    | 100.00%                            | 3                         | 4                        | 4                       | 0.02%                       | 1.72%                        | VSQDNPSVLPK                      | R                   | K               | 95.00%                                  | 2.84                     | 0.338                  | 0                                | 1                                | 0                                | 0                                | 2                           | 1,263.60                           | 2042                | 2052               | TRUE     |                |
| SNU216_PCL_03     | Isoform 1 of Amyotrophic lateral sclerosis 2 chro   | IP00043978,IP00075719,IP  | 132,497.70                    | 100.00%                            | 3                         | 3                        | 3                       | 0.02%                       | 4.65%                        | RSSDPVPGPPADTPQPSAHGGQSLK        | R                   | L               | 95.00%                                  | 5.21                     | 0.504                  | 0                                | 0                                | 1                                | 0                                | 2                           | 2,650.23                           | 139                 | 164                | TRUE     |                |
| SNU216_PCL_03     | Isoform 1 of Amyotrophic lateral sclerosis 2 chro   | IP00043978,IP00075719,IP  | 132,497.70                    | 100.00%                            | 3                         | 3                        | 3                       | 0.02%                       | 4.65%                        | SESPSKDQFPTGLK                   | K                   | K               | 95.00%                                  | 2.17                     | 0.314                  | 0                                | 1                                | 0                                | 0                                | 2                           | 1,642.77                           | 728                 | 742                | TRUE     |                |
| SNU216_PCL_03     | Isoform 1 of Amyotrophic lateral sclerosis 2 chro   | IP00043978,IP00075719,IP  | 132,497.70                    | 100.00%                            | 3                         | 3                        | 3                       | 0.02%                       | 4.65%                        | SSLSLQTAWAIVR                    | K                   | K               | 95.00%                                  | 3.18                     | 0.467                  | 0                                | 1                                | 0                                | 0                                | 2                           | 1,656.78                           | 744                 | 758                | TRUE     |                |
| SNU216_PCL_03     | Isoform 1 of U4/U6 small nuclear ribonucleoprote    | IP00005861,IP00377152     | 77,530.70                     | 100.00%                            | 2                         | 2                        | 2                       | 0.01%                       | 3.66%                        | GDDDEESDEAVKK                    | K                   | T               | 95.00%                                  | 3.22                     | 0.282                  | 0                                | 1                                | 0                                | 0                                | 2                           | 1,645.61                           | 613                 | 626                | TRUE     |                |
| SNU216_PCL_03     | Isoform 1 of U4/U6 small nuclear ribonucleoprote    | IP00005861,IP00377152     | 77,530.70                     | 100.00%                            | 2                         | 2                        | 2                       | 0.01%                       | 3.66%                        | IKWDEQTSNTKGGDDSEDEEAVK          | R                   | K               | 95.00%                                  | 4.25                     | 0.348                  | 0                                | 0                                | 1                                | 0                                | 2                           | 2,848.17                           | 602                 | 625                | TRUE     |                |
| SNU216_PCL_03     | Treadle protein                                     | IP000298696,IP00747047    | 144,311.40                    | 100.00%                            | 12                        | 17                       | 17                      | 0.11%                       | 9.21%                        | KLGAGEGGEASVSPEK                 | K                   | T               | 95.00%                                  | 3.19                     | 0.222                  | 0                                | 1                                | 0                                | 0                                | 2                           | 1,595.73                           | 1289                | 1304               | TRUE     |                |
| SNU216_PCL_03     | Treadle protein                                     | IP000298696,IP00747047    | 144,311.40                    | 100.00%                            | 12                        | 17                       | 17                      | 0.11%                       | 9.21%                        | KLGAGEGGEASVSPEKSTTSK            | K                   | G               | 95.00%                                  | 3.04                     | 0.296                  | 0                                | 0                                | 1                                | 0                                | 2                           | 2,201.03                           | 1289                | 1310               | TRUE     |                |
| SNU216_PCL_03     | Treadle protein                                     | IP000298696,IP00747047    | 144,311.40                    | 100.00%                            | 12                        | 17                       | 17                      | 0.11%                       | 9.21%                        | KSAEPSSANTILVSTEEEGSVPAFGAAAK    | R                   | P               | 95.00%                                  | 3.86                     | 0.397                  | 0                                | 0                                | 1                                | 0                                | 2                           | 2,958.36                           | 159                 | 187                | TRUE     |                |
| SNU216_PCL_03     | Treadle protein                                     | IP000298696,IP00747047    | 144,311.40                    | 100.00%                            | 12                        | 17                       | 17                      | 0.11%                       | 9.21%                        | LDSSPSVSTLAAK                    | K                   | D               | 95.00%                                  | 2.17                     | 0.42                   | 0                                | 0                                | 1                                | 0                                | 2                           | 1,442.68                           | 1148                | 1161               | TRUE     |                |
| SNU216_PCL_03     | Treadle protein                                     | IP000298696,IP00747047    | 144,311.40                    | 100.00%                            | 12                        | 17                       | 17                      | 0.11%                       | 9.21%                        | LGAGEGGEASVSPEK                  | K                   | T               | 95.00%                                  | 3                        | 0.457                  | 0                                | 1                                | 0                                | 0                                | 2                           | 1,467.64                           | 1290                | 1304               | TRUE     |                |
| SNU216_PCL_03     | Treadle protein                                     | IP000298696,IP00747047    | 144,311.40                    | 100.00%                            | 12                        | 17                       | 17                      | 0.11%                       | 9.21%                        | LGAGEGGEASVSPEKSTTSK             | K                   | G               | 95.00%                                  | 3.6                      | 0.206                  | 0                                | 1                                | 1                                | 0                                | 2                           | 2,072.94                           | 1290                | 1310               | TRUE     |                |
| SNU216_PCL_03     | Treadle protein                                     | IP000298696,IP00747047    | 144,311.40                    | 100.00%                            | 12                        | 17                       | 17                      | 0.11%                       | 9.21%                        | QEAKPQQAAGMLSPK                  | K                   | T               | 95.00%                                  | 2.69                     | 0.24                   | 0                                | 1                                | 0                                | 0                                | 2                           | 1,663.79                           | 1168                | 1182               | TRUE     |                |
| SNU216_PCL_03     | Treadle protein                                     | IP000298696,IP00747047    | 144,311.40                    | 100.00%                            | 12                        | 17                       | 17                      | 0.11%                       | 9.21%                        | SLGNILQAKPTSSPAK                 | K                   | G               | 95.00%                                  | 3.95                     | 0.449                  | 0                                | 1                                | 1                                | 0                                | 2                           | 1,691.87                           | 494                 | 509                | TRUE     |                |
| SNU216_PCL_03     | Treadle protein                                     | IP000298696,IP00747047    | 144,311.40                    | 100.00%                            | 12                        | 17                       | 17                      | 0.11%                       | 9.21%                        | SLGNILQAKPTSSPAKPPQK             | K                   | A               | 95.00%                                  | 4.08                     | 0.392                  | 0                                | 0                                | 1                                | 1                                | 2                           | 2,199.15                           | 494                 | 514                | TRUE     |                |
| SNU216_PCL_03     | Treadle protein                                     | IP000298696,IP00747047    | 144,311.40                    | 100.00%                            | 12                        | 17                       | 17                      | 0.11%                       | 9.21%                        | TSQVGAASAPAKESPR                 | K                   | K               | 95.00%                                  | 3.42                     | 0.484                  | 0                                | 1                                | 1                                | 0                                | 2                           | 1,636.77                           | 291                 | 306                | TRUE     |                |
| SNU216_PCL_03     | Treadle protein                                     | IP000298696,IP00747047    | 144,311.40                    | 100.00%                            | 12                        | 17                       | 17                      | 0.11%                       | 9.21%                        | TSQVGAASAPAKESPRK                | K                   | G               | 95.00%                                  | 3.69                     | 0.403                  | 0                                | 1                                | 1                                | 0                                | 2                           | 1,764.86                           | 291                 | 307                | TRUE     |                |
| SNU216_PCL_03     | Treadle protein                                     | IP000298696,IP00747047    | 144,311.40                    | 100.00%                            | 12                        | 17                       | 17                      | 0.11%                       | 9.21%                        | TVANLLSGKSPR                     | K                   | K               | 95.00%                                  | 3.19                     | 0.3                    | 0                                | 1                                | 1                                | 0                                | 2                           | 1,322.68                           | 147                 | 158                | TRUE     |                |
| SNU216_PCL_03     | 136 kDa protein                                     | IP00005625                | 135,683.90                    | 100.00%                            | 5                         | 6                        | 8                       | 0.05%                       | 4.69%                        | GEEGSDDDTENGPKPK                 | K                   | K               | 95.00%                                  | 3.93                     | 0.467                  | 0                                | 2                                | 0                                | 0                                | 2                           | 1,88                               |                     |                    |          |                |

Supplemental Table 2. List of all phosphorylated peptides identified in SNU216 and SNU216-LR.

| MS/MS sample name | Protein name                                                 | Protein accession numbers              | Protein molecular weight (Da) | Protein identification probability | Number of unique peptides | Number of unique spectra | Number of total spectra | Percentage of total spectra | Percentage sequence coverage | Peptide sequence              | Previous amino acid | Next amino acid | Best Peptide identification probability | Best SEQUEST XCorr score | Best SEQUEST DcN score | Number of identified +1H spectra | Number of identified +2H spectra | Number of identified +3H spectra | Number of identified +4H spectra | Number of enzymatic termini | Calculate d +1H Peptide Mass (AMU) | Peptide start index | Peptide stop index | Assigned | Other Proteins          |
|-------------------|--------------------------------------------------------------|----------------------------------------|-------------------------------|------------------------------------|---------------------------|--------------------------|-------------------------|-----------------------------|------------------------------|-------------------------------|---------------------|-----------------|-----------------------------------------|--------------------------|------------------------|----------------------------------|----------------------------------|----------------------------------|----------------------------------|-----------------------------|------------------------------------|---------------------|--------------------|----------|-------------------------|
| SNU216_PCL_03     | myosin phosphatase-Rho interacting protein isoform 1         | IP000295457                            | 118,105.80                    | 100.00%                            | 5                         | 5                        | 6                       | 0.04%                       | 8.00%                        | DFTNEAPPALPDASASPLSPHRR       | R                   | A               | 95.00%                                  | 4.35                     | 0.236                  | 0                                | 0                                | 1                                | 0                                | 2                           | 2,623.23                           | 346                 | 369                | TRUE     |                         |
| SNU216_PCL_03     | myosin phosphatase-Rho interacting protein isoform 2         | IP000295457                            | 118,105.80                    | 100.00%                            | 5                         | 5                        | 6                       | 0.04%                       | 8.00%                        | MEVDRSGLPMSDLK                | R                   | T               | 95.00%                                  | 2.41                     | 0.216                  | 0                                | 1                                | 0                                | 0                                | 2                           | 1,754.79                           | 614                 | 628                | TRUE     |                         |
| SNU216_PCL_03     | Isoform 1 of IWS1-like protein                               | IP000296432                            | 91,956.10                     | 100.00%                            | 10                        | 11                       | 12                      | 0.07%                       | 14.80%                       | AAVLSRSEDEEKASAK              | K                   | K               | 95.00%                                  | 2.49                     | 0.285                  | 0                                | 1                                | 0                                | 0                                | 2                           | 1,809.72                           | 394                 | 409                | TRUE     |                         |
| SNU216_PCL_03     | Isoform 1 of IWS1-like protein                               | IP000296432                            | 91,956.10                     | 100.00%                            | 10                        | 11                       | 12                      | 0.07%                       | 14.80%                       | EAEEDSDSDNKKR                 | K                   | G               | 95.00%                                  | 2.26                     | 0.337                  | 0                                | 1                                | 0                                | 0                                | 2                           | 1,653.57                           | 507                 | 519                | TRUE     |                         |
| SNU216_PCL_03     | Isoform 1 of IWS1-like protein                               | IP000296432                            | 91,956.10                     | 100.00%                            | 10                        | 11                       | 12                      | 0.07%                       | 14.80%                       | GPASDSETEADSR                 | K                   | H               | 95.00%                                  | 1.93                     | 0.354                  | 0                                | 1                                | 0                                | 0                                | 2                           | 1,481.48                           | 310                 | 322                | TRUE     |                         |
| SNU216_PCL_03     | Isoform 1 of IWS1-like protein                               | IP000296432                            | 91,956.10                     | 100.00%                            | 10                        | 11                       | 12                      | 0.07%                       | 14.80%                       | HQASDSENEELPKPR               | R                   | I               | 95.00%                                  | 2.42                     | 0.203                  | 0                                | 1                                | 0                                | 0                                | 2                           | 1,896.75                           | 232                 | 246                | TRUE     |                         |
| SNU216_PCL_03     | Isoform 1 of IWS1-like protein                               | IP000296432                            | 91,956.10                     | 100.00%                            | 10                        | 11                       | 12                      | 0.07%                       | 14.80%                       | HQASDSENEELPKPR               | R                   | M               | 95.00%                                  | 2.45                     | 0.396                  | 0                                | 1                                | 1                                | 0                                | 2                           | 1,880.72                           | 193                 | 207                | TRUE     |                         |
| SNU216_PCL_03     | Isoform 1 of IWS1-like protein                               | IP000296432                            | 91,956.10                     | 100.00%                            | 10                        | 11                       | 12                      | 0.07%                       | 14.80%                       | MDSDEDEKEGEEK                 | K                   | V               | 95.00%                                  | 2.43                     | 0.458                  | 0                                | 2                                | 0                                | 0                                | 2                           | 1,765.60                           | 375                 | 388                | TRUE     |                         |
| SNU216_PCL_03     | Isoform 1 of IWS1-like protein                               | IP000296432                            | 91,956.10                     | 100.00%                            | 10                        | 11                       | 12                      | 0.07%                       | 14.80%                       | NQASDSENEELPKPR               | R                   | V               | 95.00%                                  | 2.49                     | 0.396                  | 0                                | 1                                | 0                                | 0                                | 2                           | 1,873.74                           | 284                 | 298                | TRUE     |                         |
| SNU216_PCL_03     | Isoform 1 of IWS1-like protein                               | IP000296432                            | 91,956.10                     | 100.00%                            | 10                        | 11                       | 12                      | 0.07%                       | 14.80%                       | QKMSDSEDEKEGEEK               | K                   | V               | 95.00%                                  | 2.45                     | 0.327                  | 0                                | 0                                | 1                                | 0                                | 2                           | 2,021.75                           | 373                 | 388                | TRUE     |                         |
| SNU216_PCL_03     | Isoform 1 of IWS1-like protein                               | IP000296432                            | 91,956.10                     | 100.00%                            | 10                        | 11                       | 12                      | 0.07%                       | 14.80%                       | TIASDSEEEAGLESDK              | K                   | K               | 95.00%                                  | 2.07                     | 0.352                  | 0                                | 1                                | 0                                | 0                                | 2                           | 1,968.77                           | 435                 | 451                | TRUE     |                         |
| SNU216_PCL_03     | Isoform 1 of IWS1-like protein                               | IP000296432                            | 91,956.10                     | 100.00%                            | 10                        | 11                       | 12                      | 0.07%                       | 14.80%                       | TIASDSEEEAGLESDKK             | K                   | N               | 95.00%                                  | 2.13                     | 0.258                  | 0                                | 1                                | 0                                | 0                                | 2                           | 2,096.87                           | 435                 | 452                | TRUE     |                         |
| SNU216_PCL_03     | septin 9                                                     | IP000748715                            | 63,634.10                     | 99.80%                             | 2                         | 2                        | 2                       | 0.01%                       | 4.75%                        | HVDSLSQRSPK                   | R                   | A               | 95.00%                                  | 1.94                     | 0.367                  | 0                                | 1                                | 0                                | 0                                | 2                           | 1,333.63                           | 59                  | 69                 | TRUE     |                         |
| SNU216_PCL_03     | septin 9                                                     | IP000748715                            | 63,634.10                     | 99.80%                             | 2                         | 2                        | 2                       | 0.01%                       | 4.75%                        | SFEVEEVEPTNSTPPR              | R                   | R               | 95.00%                                  | 3.46                     | 0.493                  | 0                                | 1                                | 0                                | 0                                | 2                           | 1,897.82                           | 12                  | 27                 | TRUE     |                         |
| SNU216_PCL_03     | Isoform 1 of Symplekin                                       | IP00023344,IP000746292                 | 126,504.90                    | 99.80%                             | 1                         | 2                        | 2                       | 0.01%                       | 2.28%                        | SQTLAPVGEDAMKTPSPAEDAREPEAK   | R                   | G               | 95.00%                                  | 5.32                     | 0.379                  | 0                                | 0                                | 1                                | 1                                | 2                           | 3,153.39                           | 1111                | 1139               | TRUE     |                         |
| SNU216_PCL_03     | Nuclear pore complex protein Nup205                          | IP000472675                            | 228,155.70                    | 100.00%                            | 3                         | 3                        | 3                       | 0.02%                       | 1.94%                        | LLHLLDDMPKPKYSDGEGGIEDNR      | R                   | S               | 95.00%                                  | 5.27                     | 0.515                  | 0                                | 0                                | 1                                | 1                                | 2                           | 3,005.40                           | 1141                | 1166               | TRUE     |                         |
| SNU216_PCL_03     | Nuclear pore complex protein Nup205                          | IP000472675                            | 228,155.70                    | 100.00%                            | 3                         | 3                        | 3                       | 0.02%                       | 1.94%                        | LLHLLDDMPKPKYSDGEGGIEDNRSVGI  | R                   | V               | 81.80%                                  | 5.81                     | 0.0135                 | 0                                | 0                                | 0                                | 1                                | 2                           | 4,396.09                           | 1141                | 1179               | TRUE     |                         |
| SNU216_PCL_03     | Nuclear pore complex protein Nup205                          | IP000472675                            | 228,155.70                    | 100.00%                            | 3                         | 3                        | 3                       | 0.02%                       | 1.94%                        | SVSGFLHFDTATK                 | R                   | V               | 95.00%                                  | 2.5                      | 0.39                   | 0                                | 1                                | 0                                | 0                                | 2                           | 1,489.67                           | 1167                | 1179               | TRUE     |                         |
| SNU216_PCL_03     | 116 kDa U5 small nuclear ribonucleoprotein complex           | IP00003519                             | 109,438.10                    | 100.00%                            | 1                         | 1                        | 1                       | 0.01%                       | 1.34%                        | RVVYSAFMATPR                  | R                   | L               | 95.00%                                  | 2.42                     | 0.255                  | 0                                | 0                                | 1                                | 0                                | 2                           | 1,590.79                           | 814                 | 826                | TRUE     |                         |
| SNU216_PCL_03     | 5'-3' exoribonuclease 2                                      | IP000100151                            | 108,585.70                    | 100.00%                            | 2                         | 2                        | 3                       | 0.02%                       | 1.68%                        | AEDSDSEPEEDNVR                | K                   | L               | 95.00%                                  | 2.23                     | 0.442                  | 0                                | 1                                | 0                                | 0                                | 2                           | 1,848.62                           | 496                 | 510                | TRUE     |                         |
| SNU216_PCL_03     | 5'-3' exoribonuclease 2                                      | IP000100151                            | 108,585.70                    | 100.00%                            | 2                         | 2                        | 3                       | 0.02%                       | 1.68%                        | KAEDSDSEPEEDNVR               | R                   | L               | 95.00%                                  | 2.62                     | 0.4                    | 0                                | 2                                | 0                                | 0                                | 2                           | 1,896.75                           | 495                 | 510                | TRUE     |                         |
| SNU216_PCL_03     | U5 small nuclear ribonucleoprotein 200 kDa helicase          | IP000420014                            | 244,513.80                    | 100.00%                            | 1                         | 2                        | 4                       | 0.02%                       | 0.75%                        | EEASDDMDEGDEAAVR              | R                   | C               | 95.00%                                  | 3.96                     | 0.597                  | 0                                | 3                                | 1                                | 0                                | 2                           | 1,862.66                           | 222                 | 237                | TRUE     |                         |
| SNU216_PCL_03     | Isoform 1 of Alsin                                           | IP000295004                            | 183,668.60                    | 99.80%                             | 2                         | 2                        | 2                       | 0.01%                       | 2.23%                        | RLSLPGLLSQVSPR                | R                   | L               | 95.00%                                  | 2.33                     | 0.201                  | 0                                | 0                                | 1                                | 0                                | 2                           | 1,682.84                           | 481                 | 494                | TRUE     |                         |
| SNU216_PCL_03     | Isoform 1 of Alsin                                           | IP000295004                            | 183,668.60                    | 99.80%                             | 2                         | 2                        | 2                       | 0.01%                       | 2.23%                        | SESPPEGGVYVTSGLLPVLLPR        | R                   | L               | 95.00%                                  | 4.58                     | 0.0018                 | 0                                | 1                                | 0                                | 0                                | 2                           | 2,490.29                           | 1462                | 1484               | TRUE     |                         |
| SNU216_PCL_03     | Isoform 2 of AT-rich interactive domain-containing protein 1 | IP000642705,IP000643722                | 242,043.80                    | 100.00%                            | 2                         | 2                        | 3                       | 0.02%                       | 1.79%                        | GPSPPGVSASVAQSR               | R                   | S               | 95.00%                                  | 3.26                     | 0.318                  | 0                                | 2                                | 0                                | 0                                | 2                           | 1,660.77                           | 694                 | 710                | TRUE     |                         |
| SNU216_PCL_03     | Isoform 2 of AT-rich interactive domain-containing protein 1 | IP000642705,IP000643722                | 242,043.80                    | 100.00%                            | 2                         | 2                        | 3                       | 0.02%                       | 1.79%                        | SHAPMSPGSGGGQGLPAR            | R                   | T               | 95.00%                                  | 3.25                     | 0.345                  | 0                                | 0                                | 1                                | 0                                | 2                           | 1,967.85                           | 357                 | 376                | TRUE     |                         |
| SNU216_PCL_03     | Isoform 1 of Eukaryotic translation initiation factor 4E     | IP000163851,IP000456685                | 186,842.60                    | 100.00%                            | 1                         | 1                        | 1                       | 0.01%                       | 1.52%                        | MPLVQEQLPEDSGQQYVETIPSNR      | K                   | L               | 95.00%                                  | 4.28                     | 0.344                  | 0                                | 0                                | 1                                | 0                                | 2                           | 2,827.25                           | 545                 | 569                | TRUE     |                         |
| SNU216_PCL_03     | Isoform 1 of Large proline-rich protein BAT2                 | IP000010700,IP000084746,IP000084746,IP | 228,863.10                    | 100.00%                            | 11                        | 14                       | 15                      | 0.09%                       | 7.70%                        | DSQSASGERPEADKQ               | R                   | K               | 95.00%                                  | 2.49                     | 0.304                  | 0                                | 1                                | 0                                | 0                                | 2                           | 1,839.74                           | 360                 | 376                | TRUE     |                         |
| SNU216_PCL_03     | Isoform 1 of Large proline-rich protein BAT2                 | IP000010700,IP000084746,IP000084746,IP | 228,863.10                    | 100.00%                            | 11                        | 14                       | 15                      | 0.09%                       | 7.70%                        | EGPEEPVEVPTPTTPVPVK           | K                   | V               | 95.00%                                  | 3.46                     | 0.453                  | 0                                | 1                                | 1                                | 0                                | 2                           | 2,073.98                           | 597                 | 615                | TRUE     |                         |
| SNU216_PCL_03     | Isoform 1 of Large proline-rich protein BAT2                 | IP000010700,IP000084746,IP000084746,IP | 228,863.10                    | 100.00%                            | 11                        | 14                       | 15                      | 0.09%                       | 7.70%                        | GNSPNSPEPTTK                  | K                   | T               | 95.00%                                  | 2.37                     | 0.34                   | 0                                | 1                                | 0                                | 0                                | 2                           | 1,304.55                           | 738                 | 389                | TRUE     |                         |
| SNU216_PCL_03     | Isoform 1 of Large proline-rich protein BAT2                 | IP000010700,IP000084746,IP000084746,IP | 228,863.10                    | 100.00%                            | 11                        | 14                       | 15                      | 0.09%                       | 7.70%                        | GSETGSETHESDLAPSKD            | R                   | E               | 95.00%                                  | 2.91                     | 0.306                  | 0                                | 1                                | 0                                | 0                                | 2                           | 1,926.76                           | 1105                | 1122               | TRUE     |                         |
| SNU216_PCL_03     | Isoform 1 of Large proline-rich protein BAT2                 | IP000010700,IP000084746,IP000084746,IP | 228,863.10                    | 100.00%                            | 11                        | 14                       | 15                      | 0.09%                       | 7.70%                        | GSETGSETHESDLAPSKDEAPTK       | R                   | E               | 95.00%                                  | 3.83                     | 0.423                  | 0                                | 0                                | 1                                | 0                                | 2                           | 2,550.09                           | 1105                | 1128               | TRUE     |                         |
| SNU216_PCL_03     | Isoform 1 of Large proline-rich protein BAT2                 | IP000010700,IP000084746,IP000084746,IP | 228,863.10                    | 100.00%                            | 11                        | 14                       | 15                      | 0.09%                       | 7.70%                        | GKNSPNSPEPTTK                 | K                   | T               | 95.00%                                  | 2.71                     | 0.278                  | 0                                | 2                                | 0                                | 0                                | 2                           | 1,432.65                           | 377                 | 389                | TRUE     |                         |
| SNU216_PCL_03     | Isoform 1 of Large proline-rich protein BAT2                 | IP000010700,IP000084746,IP000084746,IP | 228,863.10                    | 100.00%                            | 11                        | 14                       | 15                      | 0.09%                       | 7.70%                        | LAWVGDFVITATPRPLTSPLR         | K                   | Q               | 95.00%                                  | 3.6                      | 0.358                  | 0                                | 0                                | 1                                | 0                                | 2                           | 2,574.31                           | 789                 | 811                | TRUE     |                         |
| SNU216_PCL_03     | Isoform 1 of Large proline-rich protein BAT2                 | IP000010700,IP000084746,IP000084746,IP | 228,863.10                    | 100.00%                            | 11                        | 14                       | 15                      | 0.09%                       | 7.70%                        | LKFSDEEDGRSDDEEGAEHR          | K                   | D               | 93.30%                                  | 2.17                     | 0.2                    | 0                                | 1                                | 1                                | 0                                | 2                           | 2,537.95                           | 339                 | 359                | TRUE     |                         |
| SNU216_PCL_03     | Isoform 1 of Large proline-rich protein BAT2                 | IP000010700,IP000084746,IP000084746,IP | 228,863.10                    | 100.00%                            | 11                        | 14                       | 15                      | 0.09%                       | 7.70%                        | SEGESEVEEIPK                  | R                   | R               | 95.00%                                  | 2.15                     | 0.348                  | 0                                | 1                                | 1                                | 0                                | 2                           | 1,503.64                           | 1089                | 1100               | TRUE     | IP000643923,IP000741537 |
| SNU216_PCL_03     | Isoform 1 of Large proline-rich protein BAT2                 | IP000010700,IP000084746,IP000084746,IP | 228,863.10                    | 100.00%                            | 11                        | 14                       | 15                      | 0.09%                       | 7.70%                        | SETPPVPPPPPLASYPGFENGAPGPPISR | R                   | F               | 95.00%                                  | 3.35                     | 0.3                    | 0                                | 0                                | 1                                | 0                                | 2                           | 3,265.56                           | 823                 | 853                | TRUE     |                         |
| SNU216_PCL_03     | Isoform 1 of Large proline-rich protein BAT2                 | IP000010700,IP000084746,IP000084746,IP | 228,863.10                    | 100.00%                            | 11                        | 14                       | 15                      | 0.09%                       | 7.70%                        | TASETRSEGEYEEIPK              | R                   | R               | 88.20%                                  | 2.9                      | 0.132                  | 0                                | 0                                | 1                                | 0                                | 2                           | 1,992.84                           | 1083                | 1099               | TRUE     |                         |
| SNU216_PCL_03     | Absent in melanoma 1 protein                                 | IP000294840                            | 188,677.20                    | 100.00%                            | 3                         | 3                        | 3                       | 0.02%                       | 2.55%                        | AALDGGVASASPESSKPSPGTK        | R                   | G               | 95.00%                                  | 3.31                     | 0.303                  | 0                                | 0                                | 1                                | 0                                | 2                           | 2,077.98                           | 64                  | 85                 | TRUE     |                         |
| SNU216_PCL_03     | Absent in melanoma 1 protein                                 | IP000294840                            | 188,677.20                    | 100.00%                            | 3                         | 3                        | 3                       | 0.02%                       | 2.55%                        | RGSQKSTDSPGDAELPESAAR         | R                   | D               | 95.00%                                  | 3.69                     | 0.425                  | 0                                | 0                                | 1                                | 0                                | 2                           | 2,469.97                           | 14                  | 35                 | TRUE     |                         |
| SNU216_PCL_03     | Absent in melanoma 1 protein                                 | IP000294840                            | 188,677.20                    | 100.00%                            | 3                         | 3                        | 3                       | 0.02%                       | 2.55%                        | STDSPGADAEPLSAAR              | K                   | D               | 95.00%                                  | 3                        | 0.527                  | 0                                | 0                                | 1                                | 0                                | 2                           | 1,753.73                           | 19                  | 35                 | TRUE     |                         |
| SNU216_PCL_03     | YTH domain containing 2                                      | IP000010200                            | 160,265.80                    | 100.00%                            | 1                         | 1                        | 1                       | 0.01%                       | 1.12%                        | VDGIPNDSDSSEMDK               | R                   | T               | 95.00%                                  | 2.61                     | 0.375                  | 0                                | 1                                | 0                                | 0                                | 2                           | 1,817.68                           | 1082                | 1097               | TRUE     |                         |
| SNU216_PCL_03     | Hypothetical protein DKFZp686L2367                           | IP000470461                            | 284,629.80                    | 100.00%                            | 4                         | 4                        | 4                       | 0.02%                       | 2.11%                        | KLANDPFLDLSPVK                | R                   | K               | 95.00%                                  | 3.47                     | 0.453                  | 0                                | 0                                | 1                                | 0                                | 2                           | 1,636.83                           | 678                 | 691                | TRUE     |                         |
| SNU216_PCL_03     | Hypothetical protein DKFZp686L2367                           | IP000470461                            | 284,629.80                    | 100.00%                            | 4                         | 4                        | 4                       | 0.02%                       | 2.11%                        | NNSRVPVPLSGAAAGTEQK           | R                   | T               | 95.00%                                  | 3.26                     | 0.31                   | 0                                | 0                                | 1                                | 0                                | 2                           | 2,062.99                           | 2167                | 2186               | TRUE     |                         |
| SNU216_PCL_03     | Hypothetical protein DKFZp686L2367                           | IP000470461                            | 284,629.80                    | 100.00%                            | 4                         | 4                        | 4                       | 0.02%                       | 2.11%                        | VIPSPKDDSPQSEELR              | K                   | R               | 95.00%                                  | 3.59                     | 0.454                  | 0                                | 0                                | 1                                | 0                                | 2                           | 2,200.09                           | 1743                | 1761               | TRUE     |                         |
| SNU216_PCL_03     | Hypothetical protein DKFZp686L2367                           | IP000470461                            | 284,629.80                    | 100.00%                            | 4                         | 4                        | 4                       | 0.02%                       | 2.11%                        | VSPVPLSGAAAGTEQK              | R                   | T               | 95.00%                                  | 2.2                      | 0.264                  | 0                                | 1                                | 0                                | 0                                | 2                           | 1,591.77                           | 2171                | 2186               | TRUE     |                         |
| SNU216_PCL_03     | Isoform C of Lamin-A/C                                       | IP000216952                            | 65,136.10                     | 100.00%                            | 1                         | 1                        | 1                       | 0.01%                       | 2.45%                        | SGAQASSTPLSPTR                | R                   | I               | 91.60%                                  | 2.29                     | 0.196                  | 0                                | 1                                | 0                                | 0                                | 2                           | 1,439.65                           | 12                  | 25                 | TRUE     |                         |
| SNU216_PCL_03     | Isoform 1 of Beta-catenin                                    | IP000017292                            | 85,497.00                     | 99.80%                             | 2                         | 2                        | 2                       | 0.01%                       | 2.05%                        | RTSMGGTQQQFVEGVR              | R                   | M               | 95.00%                                  | 3.74                     | 0.377                  | 0                                | 0                                | 1                                | 0                                | 2                           | 1,860.84                           | 550                 | 565                | TRUE     |                         |
| SNU216_PCL_03     | Isoform 1 of Beta-catenin                                    | IP000017292                            | 85,497.00                     | 99.80%                             | 2                         | 2                        | 2                       | 0.01%                       | 2.05%                        | TSMGGTQQQFVEGVR               | R                   | M               | 95.00%                                  | 3.42                     | 0.518                  | 0                                | 1                                | 0                                | 0                                | 2                           | 1,704.74                           | 551                 | 565                | TRUE     |                         |
| SNU216_PCL_03     | HSPC121                                                      | IP00008998                             | 44,424.70                     | 100.00%                            | 1                         | 2                        | 6                       | 0.04%                       | 3.22%                        | WLDESDAEMLR                   | A                   | A               | 95.00%                                  | 3.19                     | 0.326                  | 1                                | 5                                | 0                                | 0                                | 2                           | 1,573.62                           | 110                 | 121                | TRUE     |                         |
| SNU216_PCL_03     |                                                              |                                        |                               |                                    |                           |                          |                         |                             |                              |                               |                     |                 |                                         |                          |                        |                                  |                                  |                                  |                                  |                             |                                    |                     |                    |          |                         |

Supplemental Table 2. List of all phosphorylated peptides identified in SNU216 and SNU216-LR.

| MS/MS sample name | Protein name                                       | Protein accession numbers  | Protein molecular weight (Da) | Protein identification probability | Number of unique peptides | Number of unique spectra | Number of total spectra | Percentage of total spectra | Percentage sequence coverage | Peptide sequence                | Previous amino acid | Next amino acid | Best Peptide identification probability | Best SEQUEST XCorr score | Best SEQUEST Dcn score | Number of identified +1H spectra | Number of identified +2H spectra | Number of identified +3H spectra | Number of identified +4H spectra | Number of enzymatic termini | Calculate d +1H Peptide Mass (AMU) | Peptide start index | Peptide stop index | Assigned | Other Proteins                      |
|-------------------|----------------------------------------------------|----------------------------|-------------------------------|------------------------------------|---------------------------|--------------------------|-------------------------|-----------------------------|------------------------------|---------------------------------|---------------------|-----------------|-----------------------------------------|--------------------------|------------------------|----------------------------------|----------------------------------|----------------------------------|----------------------------------|-----------------------------|------------------------------------|---------------------|--------------------|----------|-------------------------------------|
| SNU216_PCL_03     | Isoform 2 of Nuclear mitotic apparatus protein 1   | IP00006196,IP00292771      | 238,274.50                    | 100.00%                            | 4                         | 6                        | 8                       | 0.05%                       | 3.52%                        | TQPDGTSVPGEASPISQSR             | R                   | L               | 95.00%                                  | 4.18                     | 0.505                  | 0                                | 2                                | 1                                | 0                                | 2                           | 2,003.91                           | 1744                | 1762               | TRUE     |                                     |
| SNU216_PCL_03     | ATP-dependent RNA helicase DDX54                   | IP000152510                | 98,597.90                     | 99.80%                             | 2                         | 2                        | 2                       | 0.01%                       | 1.82%                        | IDDRDSDEEGASDR                  | K                   | R               | 95.00%                                  | 2.42                     | 0.368                  | 0                                | 1                                | 0                                | 0                                | 2                           | 1,659.61                           | 777                 | 790                | TRUE     |                                     |
| SNU216_PCL_03     | ATP-dependent RNA helicase DDX54                   | IP000152510                | 98,597.90                     | 99.80%                             | 2                         | 2                        | 2                       | 0.01%                       | 1.82%                        | QKIDRDSDEEGASDR                 | K                   | R               | 95.00%                                  | 2.84                     | 0.386                  | 0                                | 1                                | 0                                | 0                                | 2                           | 1,915.77                           | 775                 | 790                | TRUE     |                                     |
| SNU216_PCL_03     | Microtubule-actin crosslinking factor 1, isoform 4 | IP000432363,IP000478739,IP | 670,150.10                    | 100.00%                            | 1                         | 1                        | 1                       | 0.01%                       | 0.96%                        | AFLAELQNSPK                     | K                   | I               | 95.00%                                  | 3.46                     | 0.468                  | 0                                | 1                                | 0                                | 0                                | 2                           | 1,426.66                           | 2947                | 2958               | FALSE    | IP000256861,IP000550385,IP000513991 |
| SNU216_PCL_03     | Microtubule-actin crosslinking factor 1, isoform 4 | IP000432363,IP000478739,IP | 670,150.10                    | 100.00%                            | 1                         | 1                        | 1                       | 0.01%                       | 0.96%                        | DEYQTSPPKQVEIGHQR               | R                   | Q               | 95.00%                                  | 2.84                     | 0.248                  | 0                                | 1                                | 0                                | 0                                | 2                           | 2,062.96                           | 436                 | 452                | TRUE     |                                     |
| SNU216_PCL_03     | Microtubule-actin crosslinking factor 1, isoform 4 | IP000432363,IP000478739,IP | 670,150.10                    | 100.00%                            | 1                         | 1                        | 1                       | 0.01%                       | 0.96%                        | QGSFSEDVSHK                     | R                   | G               | 95.00%                                  | 3.1                      | 0.41                   | 0                                | 1                                | 1                                | 0                                | 2                           | 1,413.60                           | 2360                | 2371               | FALSE    | IP000256861,IP000550385,IP000513991 |
| SNU216_PCL_03     | Microtubule-actin crosslinking factor 1, isoform 4 | IP000432363,IP000478739,IP | 670,150.10                    | 100.00%                            | 1                         | 1                        | 1                       | 0.01%                       | 0.96%                        | RQGSFSEDVSHK                    | K                   | G               | 95.00%                                  | 2.49                     | 0.207                  | 0                                | 1                                | 1                                | 0                                | 2                           | 1,569.71                           | 2359                | 2371               | FALSE    | IP000256861,IP000550385,IP000513991 |
| SNU216_PCL_03     | Microtubule-actin crosslinking factor 1, isoform 4 | IP000432363,IP000478739,IP | 670,150.10                    | 100.00%                            | 1                         | 1                        | 1                       | 0.01%                       | 0.96%                        | SMDAMSSPTK                      | K                   | T               | 95.00%                                  | 2.57                     | 0.461                  | 0                                | 1                                | 0                                | 0                                | 2                           | 1,134.42                           | 2925                | 2934               | FALSE    | IP000256861,IP000550385,IP000513991 |
| SNU216_PCL_03     | Microtubule-actin crosslinking factor 1, isoform 4 | IP000432363,IP000478739,IP | 670,150.10                    | 100.00%                            | 1                         | 1                        | 1                       | 0.01%                       | 0.96%                        | SMDAMSSPTKTEVK                  | K                   | A               | 95.00%                                  | 3.95                     | 0.0599                 | 0                                | 1                                | 0                                | 0                                | 2                           | 1,692.72                           | 2925                | 2939               | FALSE    | IP000256861,IP000550385,IP000513991 |
| SNU216_PCL_03     | Cleavage and polyadenylation specificity factor, 1 | IP000026219                | 160,885.90                    | 100.00%                            | 1                         | 2                        | 3                       | 0.02%                       | 2.70%                        | SGPEAEGLSGETSPTVDDDEEMLYDGSGLF  | R                   | R               | 95.00%                                  | 4.96                     | 0.272                  | 0                                | 2                                | 1                                | 2                                | 4,169.75                    | 725                                | 763                 | TRUE               |          |                                     |
| SNU216_PCL_03     | Isoform 1 of Opioid growth factor receptor         | IP000021537                | 73,338.60                     | 99.80%                             | 1                         | 1                        | 1                       | 0.01%                       | 2.95%                        | KVEEESGPGDPDHEASTQGR            | R                   | T               | 95.00%                                  | 4                        | 0.36                   | 0                                | 1                                | 0                                | 0                                | 2                           | 2,204.91                           | 309                 | 328                | TRUE     |                                     |
| SNU216_PCL_03     | triple functional domain                           | IP000657953                | 346,902.60                    | 100.00%                            | 5                         | 7                        | 8                       | 0.05%                       | 2.36%                        | AGAAASPLNSPLSSAVPSLGK           | R                   | E               | 95.00%                                  | 2.88                     | 0.41                   | 0                                | 1                                | 0                                | 0                                | 2                           | 1,983.92                           | 2451                | 2470               | TRUE     |                                     |
| SNU216_PCL_03     | triple functional domain                           | IP000657953                | 346,902.60                    | 100.00%                            | 5                         | 7                        | 8                       | 0.05%                       | 2.36%                        | GAANASGSSPDAPAK                 | K                   | D               | 95.00%                                  | 2.71                     | 0.361                  | 0                                | 1                                | 0                                | 0                                | 2                           | 1,380.58                           | 2421                | 2435               | TRUE     |                                     |
| SNU216_PCL_03     | triple functional domain                           | IP000657953                | 346,902.60                    | 100.00%                            | 5                         | 7                        | 8                       | 0.05%                       | 2.36%                        | KGAANASGSSPDAPAK                | R                   | D               | 95.00%                                  | 3.29                     | 0.362                  | 0                                | 1                                | 0                                | 0                                | 2                           | 1,508.67                           | 2420                | 2435               | TRUE     |                                     |
| SNU216_PCL_03     | triple functional domain                           | IP000657953                | 346,902.60                    | 100.00%                            | 5                         | 7                        | 8                       | 0.05%                       | 2.36%                        | LLVRPTSSETPSAELVSAIEELVK        | R                   | S               | 95.00%                                  | 2.46                     | 0.217                  | 0                                | 0                                | 1                                | 1                                | 2                           | 2,719.42                           | 1894                | 1918               | TRUE     |                                     |
| SNU216_PCL_03     | triple functional domain                           | IP000657953                | 346,902.60                    | 100.00%                            | 5                         | 7                        | 8                       | 0.05%                       | 2.36%                        | SSMEMEGFNRK                     | R                   | D               | 95.00%                                  | 3.45                     | 0.367                  | 0                                | 1                                | 2                                | 0                                | 2                           | 1,489.59                           | 1723                | 1734               | TRUE     |                                     |
| SNU216_PCL_03     | pectin 1 isoform 1                                 | IP000398002                | 518,467.20                    | 98.90%                             | 1                         | 1                        | 1                       | 0.01%                       | 2.78%                        | AGTLSTEFADMLSGNAGFRSR           | R                   | S               | 95.00%                                  | 3.92                     | 0.506                  | 0                                | 1                                | 1                                | 0                                | 2                           | 2,438.12                           | 4251                | 4273               | FALSE    | IP000186711,IP000398779             |
| SNU216_PCL_03     | pectin 1 isoform 1                                 | IP000398002                | 518,467.20                    | 98.90%                             | 1                         | 1                        | 1                       | 0.01%                       | 2.78%                        | AQLPEVASPAK                     | K                   | K               | 95.00%                                  | 2.2                      | 0.273                  | 1                                | 0                                | 0                                | 0                                | 2                           | 1,190.58                           | 1318                | 1328               | FALSE    | IP000186711,IP000398779             |
| SNU216_PCL_03     | pectin 1 isoform 1                                 | IP000398002                | 518,467.20                    | 98.90%                             | 1                         | 1                        | 1                       | 0.01%                       | 2.78%                        | ARSDEGQLSPATR                   | R                   | G               | 95.00%                                  | 3.33                     | 0.408                  | 0                                | 0                                | 1                                | 0                                | 2                           | 1,467.66                           | 602                 | 614                | FALSE    | IP000186711,IP000398779             |
| SNU216_PCL_03     | pectin 1 isoform 1                                 | IP000398002                | 518,467.20                    | 98.90%                             | 1                         | 1                        | 1                       | 0.01%                       | 2.78%                        | GYSPYSVSGSGTAGSR                | K                   | T               | 95.00%                                  | 3.54                     | 0.057                  | 0                                | 3                                | 0                                | 0                                | 2                           | 1,862.76                           | 4500                | 4517               | FALSE    | IP000186711,IP000398779             |
| SNU216_PCL_03     | pectin 1 isoform 1                                 | IP000398002                | 518,467.20                    | 98.90%                             | 1                         | 1                        | 1                       | 0.01%                       | 2.78%                        | RGSFDATGGSGMTFTSSSYSSSGYGR      | R                   | R               | 95.00%                                  | 5.52                     | 0.134                  | 0                                | 1                                | 3                                | 0                                | 2                           | 2,853.15                           | 4530                | 4556               | FALSE    | IP000186711,IP000398779             |
| SNU216_PCL_03     | pectin 1 isoform 1                                 | IP000398002                | 518,467.20                    | 98.90%                             | 1                         | 1                        | 1                       | 0.01%                       | 2.78%                        | SDEGQLSPATR                     | R                   | G               | 95.00%                                  | 2.23                     | 0.271                  | 0                                | 1                                | 0                                | 0                                | 2                           | 1,240.52                           | 604                 | 614                | FALSE    | IP000186711,IP000398779             |
| SNU216_PCL_03     | pectin 1 isoform 1                                 | IP000398002                | 518,467.20                    | 98.90%                             | 1                         | 1                        | 1                       | 0.01%                       | 2.78%                        | SGGGAGSGNSVLDPAAER              | R                   | A               | 95.00%                                  | 2.82                     | 0.366                  | 0                                | 1                                | 0                                | 0                                | 2                           | 1,610.68                           | 42                  | 58                 | TRUE     |                                     |
| SNU216_PCL_03     | pectin 1 isoform 1                                 | IP000398002                | 518,467.20                    | 98.90%                             | 1                         | 1                        | 1                       | 0.01%                       | 2.78%                        | SSVSGSSSYSPSAVSR                | R                   | T               | 95.00%                                  | 3.15                     | 0.236                  | 0                                | 3                                | 0                                | 0                                | 2                           | 1,834.82                           | 4274                | 4291               | FALSE    | IP000186711,IP000398779             |
| SNU216_PCL_03     | CCAAT/enhancer-binding protein zeta                | IP000306723                | 120,992.20                    | 100.00%                            | 2                         | 2                        | 3                       | 0.02%                       | 5.69%                        | RPWRFEEAVEPDDEEDDNTSEANGFSLE    | K                   | L               | 95.00%                                  | 4.15                     | 0.323                  | 0                                | 0                                | 1                                | 2                                | 4,068.73                    | 14                                 | 47                  | TRUE               |          |                                     |
| SNU216_PCL_03     | CCAAT/enhancer-binding protein zeta                | IP000306723                | 120,992.20                    | 100.00%                            | 2                         | 2                        | 3                       | 0.02%                       | 5.69%                        | QLDDHPESDDEENFIDANDDEEDMEK      | R                   | F               | 95.00%                                  | 4.39                     | 0.548                  | 0                                | 0                                | 2                                | 0                                | 2                           | 3,148.14                           | 621                 | 646                | TRUE     |                                     |
| SNU216_PCL_03     | PDZ domain-containing protein 8                    | IP000168698                | 128,567.00                    | 98.80%                             | 1                         | 1                        | 1                       | 0.01%                       | 1.73%                        | RVPITLSIKPLGAISPLNLR            | K                   | K               | 95.00%                                  | 3.29                     | 0.339                  | 0                                | 0                                | 1                                | 0                                | 2                           | 2,212.26                           | 524                 | 543                | TRUE     |                                     |
| SNU216_PCL_03     | Isoform 6 of Transcriptional regulator ATRX        | IP000413734                | 274,989.90                    | 100.00%                            | 5                         | 5                        | 5                       | 0.03%                       | 3.71%                        | DFDSSEDEKHSK                    | K                   | K               | 95.00%                                  | 1.77                     | 0.408                  | 0                                | 1                                | 0                                | 0                                | 2                           | 1,583.53                           | 778                 | 789                | TRUE     |                                     |
| SNU216_PCL_03     | Isoform 6 of Transcriptional regulator ATRX        | IP000413734                | 274,989.90                    | 100.00%                            | 5                         | 5                        | 5                       | 0.03%                       | 3.71%                        | ETFSSAEGTVDKDITIMELR            | R                   | D               | 95.00%                                  | 4.23                     | 0.417                  | 0                                | 0                                | 1                                | 0                                | 2                           | 2,310.02                           | 818                 | 837                | TRUE     |                                     |
| SNU216_PCL_03     | Isoform 6 of Transcriptional regulator ATRX        | IP000413734                | 274,989.90                    | 100.00%                            | 5                         | 5                        | 5                       | 0.03%                       | 3.71%                        | KKDELSDYAEK                     | K                   | S               | 95.00%                                  | 2.7                      | 0.249                  | 0                                | 1                                | 0                                | 0                                | 2                           | 1,405.62                           | 988                 | 998                | TRUE     |                                     |
| SNU216_PCL_03     | Isoform 6 of Transcriptional regulator ATRX        | IP000413734                | 274,989.90                    | 100.00%                            | 5                         | 5                        | 5                       | 0.03%                       | 3.71%                        | LTVSDGESGEEK                    | K                   | K               | 91.10%                                  | 1.85                     | 0.256                  | 0                                | 1                                | 0                                | 0                                | 2                           | 1,410.51                           | 1277                | 1288               | TRUE     |                                     |
| SNU216_PCL_03     | Isoform 6 of Transcriptional regulator ATRX        | IP000413734                | 274,989.90                    | 100.00%                            | 5                         | 5                        | 5                       | 0.03%                       | 3.71%                        | VYESDDEKPLDDETVDNEDASNENSENDITM | K                   | D               | 95.00%                                  | 6.15                     | 0.031                  | 0                                | 0                                | 1                                | 0                                | 2                           | 4,050.68                           | 89                  | 123                | TRUE     |                                     |
| SNU216_PCL_03     | LOC387680 protein (Fragment)                       | IP000718792                | 132,578.30                    | 100.00%                            | 5                         | 6                        | 6                       | 0.04%                       | 5.44%                        | ASALLFSSDDEEQWNIPASQTHLASDSR    | K                   | S               | 95.00%                                  | 6.04                     | 0.508                  | 0                                | 0                                | 1                                | 0                                | 2                           | 3,155.40                           | 507                 | 534                | TRUE     |                                     |
| SNU216_PCL_03     | LOC387680 protein (Fragment)                       | IP000718792                | 132,578.30                    | 100.00%                            | 5                         | 6                        | 6                       | 0.04%                       | 5.44%                        | ERRTPSDDEEDNLFPAPK              | K                   | L               | 95.00%                                  | 2.66                     | 0.396                  | 0                                | 0                                | 1                                | 0                                | 2                           | 2,275.93                           | 222                 | 239                | TRUE     |                                     |
| SNU216_PCL_03     | LOC387680 protein (Fragment)                       | IP000718792                | 132,578.30                    | 100.00%                            | 5                         | 6                        | 6                       | 0.04%                       | 5.44%                        | GLFSDDEEDSEDLFSSQSASK           | K                   | L               | 95.00%                                  | 4.01                     | 0.52                   | 0                                | 1                                | 0                                | 0                                | 2                           | 2,257.90                           | 430                 | 449                | TRUE     |                                     |
| SNU216_PCL_03     | LOC387680 protein (Fragment)                       | IP000718792                | 132,578.30                    | 100.00%                            | 5                         | 6                        | 6                       | 0.04%                       | 5.44%                        | RTPSDDEEDNLFPAPK                | K                   | L               | 95.00%                                  | 3.22                     | 0.325                  | 0                                | 1                                | 0                                | 0                                | 2                           | 1,910.82                           | 224                 | 239                | TRUE     |                                     |
| SNU216_PCL_03     | LOC387680 protein (Fragment)                       | IP000718792                | 132,578.30                    | 100.00%                            | 5                         | 6                        | 6                       | 0.04%                       | 5.44%                        | TPSDDEEDNLFPAPK                 | R                   | L               | 95.00%                                  | 2.89                     | 0.434                  | 0                                | 1                                | 0                                | 0                                | 2                           | 1,754.72                           | 225                 | 239                | TRUE     |                                     |
| SNU216_PCL_03     | Isoform 3 of Protein KIAA0310                      | IP000166487,IP000219314,IP | 233,515.30                    | 100.00%                            | 5                         | 5                        | 6                       | 0.04%                       | 5.74%                        | AQQELVPPQQASPPQLPK              | R                   | A               | 95.00%                                  | 3.48                     | 0.233                  | 0                                | 0                                | 1                                | 0                                | 2                           | 2,164.08                           | 879                 | 897                | TRUE     |                                     |
| SNU216_PCL_03     | Isoform 3 of Protein KIAA0310                      | IP000166487,IP000219314,IP | 233,515.30                    | 100.00%                            | 5                         | 5                        | 6                       | 0.04%                       | 5.74%                        | GSVSPQSTPSPPKPTGIFQTSAANSFEPVK  | R                   | S               | 81.70%                                  | 4.87                     | 0.0369                 | 0                                | 1                                | 0                                | 0                                | 2                           | 3,219.46                           | 408                 | 437                | TRUE     |                                     |
| SNU216_PCL_03     | Isoform 3 of Protein KIAA0310                      | IP000166487,IP000219314,IP | 233,515.30                    | 100.00%                            | 5                         | 5                        | 6                       | 0.04%                       | 5.74%                        | LIPSAQTLPDGLASPAR               | R                   | V               | 95.00%                                  | 3.23                     | 0.551                  | 0                                | 1                                | 0                                | 0                                | 2                           | 1,981.02                           | 1771                | 1789               | TRUE     |                                     |
| SNU216_PCL_03     | Isoform 3 of Protein KIAA0310                      | IP000166487,IP000219314,IP | 233,515.30                    | 100.00%                            | 5                         | 5                        | 6                       | 0.04%                       | 5.74%                        | QIDSSPVGGTDETTVTSQNYR           | K                   | G               | 95.00%                                  | 4.79                     | 0.0042                 | 0                                | 1                                | 0                                | 0                                | 2                           | 2,363.00                           | 387                 | 407                | TRUE     |                                     |
| SNU216_PCL_03     | Isoform 3 of Protein KIAA0310                      | IP000166487,IP000219314,IP | 233,515.30                    | 100.00%                            | 5                         | 5                        | 6                       | 0.04%                       | 5.74%                        | SNFSSGGPFGEYGPADTVWPAMEQVSSRI   | R                   | F               | 95.00%                                  | 6.53                     | 0.0193                 | 0                                | 0                                | 2                                | 0                                | 2                           | 3,882.70                           | 1232                | 1266               | TRUE     |                                     |
| SNU216_PCL_03     | Thyroid receptor-interacting protein 11            | IP00003515                 | 227,643.50                    | 100.00%                            | 2                         | 2                        | 2                       | 0.01%                       | 0.76%                        | LSVHDMKPLDSPGR                  | K                   | R               | 95.00%                                  | 3.33                     | 0.42                   | 0                                | 0                                | 1                                | 0                                | 2                           | 1,631.76                           | 1881                | 1894               | TRUE     |                                     |
| SNU216_PCL_03     | Thyroid receptor-interacting protein 11            | IP00003515                 | 227,643.50                    | 100.00%                            | 2                         | 2                        | 2                       | 0.01%                       | 0.76%                        | LSVHDMKPLDSPGR                  | K                   | K               | 95.00%                                  | 2.14                     | 0.25                   | 0                                | 0                                | 1                                | 2                                | 1,787.86                    | 1881                               | 1895                | TRUE               |          |                                     |
| SNU216_PCL_03     | Splicing factor 45                                 | IP000176706,IP000479589,IP | 25,283.40                     | 99.40%                             | 2                         | 2                        | 2                       | 0.01%                       | 8.48%                        | RPODPSDEDEYER                   | R                   | E               | 95.00%                                  | 4.14                     | 0.601                  | 0                                | 1                                | 0                                | 0                                | 2                           | 1,817.65                           | 57                  | 70                 | TRUE     |                                     |
| SNU216_PCL_03     | Splicing factor 45                                 | IP000176706,IP000479589,IP | 25,283.40                     | 99.40%                             | 2                         | 2                        | 2                       | 0.01%                       | 8.48%                        | SPTGNSNSFLANMGTVAAHK            | R                   | I               | 88.80%                                  | 3.19                     | 0.169                  | 0                                | 0                                | 1                                | 0                                | 2                           | 2,052.92                           | 129                 | 148                | TRUE     |                                     |
| SNU216_PCL_03     | Isoform 1 of Transcription elongation factor SPT6  | IP000456681                | 199,275.80                    | 100.00%                            | 3                         | 6                        | 9                       | 0.06%                       | 2.37%                        | KMSDDEDDDEEYGEKEHEK             | K                   | E               | 95.00%                                  | 6.78                     | 0.59                   | 0                                | 1                                | 2                                | 2                                | 2,536.92                    | 123                                | 142                 | TRUE               |          |                                     |
| SNU216_PCL_03     | Isoform 1 of Transcription elongation factor SPT6  | IP000456681                | 199,275.80                    | 100.00%                            | 3                         | 6                        | 9                       | 0.06%                       | 2.37%                        | TRTPASINATPANINLADLTR           | R                   | A               | 95.00%                                  | 2.81                     | 0.391                  | 0                                | 1                                | 2                                | 0                                | 2                           | 2,408.82                           | 124                 | 142                | TRUE     |                                     |
| SNU216_PCL_03     | Isoform 1 of Transcription elongation factor SPT6  | IP000456681                | 199,275.80                    | 100.00%                            | 3                         | 6                        | 9                       | 0.06%                       | 2.37%                        | TRTPASINATPANINLADLTR           | R                   | A               | 95.00%                                  | 2.81                     | 0.391                  | 0                                | 1                                | 2                                | 0                                | 2                           | 2,370.12                           | 1532                | 1552               | TRUE     |                                     |
| SNU216_PCL_03     | 132 kDa protein                                    | IP000020204                | 131,684.30                    | 99.80%                             | 2                         | 3                        | 3                       | 0.02%                       | 3.26%                        | HGLQLGAQSPGR                    | R                   | G               | 95.00%                                  | 2.09</                   |                        |                                  |                                  |                                  |                                  |                             |                                    |                     |                    |          |                                     |

Supplemental Table 2. List of all phosphorylated peptides identified in SNU216 and SNU216-LR.

| MS/MS sample name | Protein name                                     | Protein accession numbers  | Protein molecular weight (Da) | Protein identification probability | Number of unique peptides | Number of unique spectra | Number of total spectra | Percentage of total spectra | Percentage sequence coverage | Peptide sequence                | Previous amino acid | Next amino acid | Best Peptide identification probability | Best SEQUEST XCorr score | Best SEQUEST DcN score | Number of identified +1H spectra | Number of identified +2H spectra | Number of identified +3H spectra | Number of identified +4H spectra | Number of enzymatic termini | Calculate d +1H Peptide Mass (AMU) | Peptide start index | Peptide stop index | Assigned | Other Proteins |
|-------------------|--------------------------------------------------|----------------------------|-------------------------------|------------------------------------|---------------------------|--------------------------|-------------------------|-----------------------------|------------------------------|---------------------------------|---------------------|-----------------|-----------------------------------------|--------------------------|------------------------|----------------------------------|----------------------------------|----------------------------------|----------------------------------|-----------------------------|------------------------------------|---------------------|--------------------|----------|----------------|
| SNU216_PC1_03     | Lipopolysaccharide-responsive and beige-like anc | IP000002255                | 319,162.50                    | 100.00%                            | 4                         | 4                        | 4                       | 0.02%                       | 3.00%                        | KSAVSPSTFNTSIPTNVAVSVSSVDSQAQSE | K                   | S               | 95.00%                                  | 6.82                     | 0.0437                 | 0                                | 0                                | 1                                | 0                                | 2                           | 3,991.82                           | 1732                | 1771               | TRUE     |                |
| SNU216_PC1_03     | Lipopolysaccharide-responsive and beige-like anc | IP000002255                | 319,162.50                    | 100.00%                            | 4                         | 4                        | 4                       | 0.02%                       | 3.00%                        | SAVSPSTFNTSIPTNVAVSVSSVDSQAQSDA | K                   | S               | 95.00%                                  | 4.47                     | 0.367                  | 0                                | 0                                | 1                                | 0                                | 2                           | 3,863.73                           | 1733                | 1771               | TRUE     |                |
| SNU216_PC1_03     | Lipopolysaccharide-responsive and beige-like anc | IP000002255                | 319,162.50                    | 100.00%                            | 4                         | 4                        | 4                       | 0.02%                       | 3.00%                        | VEGSPTEEANLPTELQDNLSPAASEAGEK   | K                   | L               | 95.00%                                  | 4.05                     | 0.381                  | 0                                | 0                                | 1                                | 0                                | 2                           | 3,150.40                           | 1115                | 1144               | TRUE     |                |
| SNU216_PC1_03     | Lipopolysaccharide-responsive and beige-like anc | IP000002255                | 319,162.50                    | 100.00%                            | 4                         | 4                        | 4                       | 0.02%                       | 3.00%                        | VPSPPPTGDGDDGGGGGR              | K                   | E               | 95.00%                                  | 2.13                     | 0.23                   | 0                                | 1                                | 0                                | 0                                | 2                           | 1,502.63                           | 8                   | 23                 | TRUE     |                |
| SNU216_PC1_03     | Isoform 1 of Protein KIAA0195                    | IP000431262,IP000431263    | 154,928.50                    | 99.60%                             | 2                         | 2                        | 2                       | 0.01%                       | 3.23%                        | GKDDHEHVLPEGLDFPPFSPPPSPR       | R                   | G               | 95.00%                                  | 4.34                     | 0.463                  | 0                                | 0                                | 1                                | 0                                | 2                           | 3,016.39                           | 202                 | 227                | TRUE     |                |
| SNU216_PC1_03     | Isoform 1 of Protein KIAA0195                    | IP000431262,IP000431263    | 154,928.50                    | 99.60%                             | 2                         | 2                        | 2                       | 0.01%                       | 3.23%                        | VEPPHSSHEDLTDLGLSTR             | K                   | S               | 91.30%                                  | 2.91                     | 0.142                  | 0                                | 0                                | 1                                | 0                                | 2                           | 2,056.90                           | 445                 | 462                | TRUE     |                |
| SNU216_PC1_03     | Isoform Long of Antigen KI-67                    | IP000004233,IP000301293    | 358,695.80                    | 100.00%                            | 5                         | 6                        | 6                       | 0.04%                       | 2.95%                        | AFMESPQQLDASAALTSQK             | K                   | R               | 95.00%                                  | 2.74                     | 0.425                  | 0                                | 0                                | 1                                | 0                                | 2                           | 2,161.02                           | 1675                | 1694               | TRUE     |                |
| SNU216_PC1_03     | Isoform Long of Antigen KI-67                    | IP000004233,IP000301293    | 358,695.80                    | 100.00%                            | 5                         | 6                        | 6                       | 0.04%                       | 2.95%                        | LQTSGGQSTHTRKEPASGDEGIK         | R                   | V               | 95.00%                                  | 3.07                     | 0.185                  | 0                                | 0                                | 1                                | 2                                | 2,489.13                    | 2622                               | 2644                | TRUE               |          |                |
| SNU216_PC1_03     | Isoform Long of Antigen KI-67                    | IP000004233,IP000301293    | 358,695.80                    | 100.00%                            | 5                         | 6                        | 6                       | 0.04%                       | 2.95%                        | SGGSGHAVAEPASPEQLDQNK           | K                   | G               | 95.00%                                  | 4.3                      | 0.47                   | 0                                | 0                                | 1                                | 0                                | 2                           | 2,287.98                           | 296                 | 317                | TRUE     |                |
| SNU216_PC1_03     | Isoform Long of Antigen KI-67                    | IP000004233,IP000301293    | 358,695.80                    | 100.00%                            | 5                         | 6                        | 6                       | 0.04%                       | 2.95%                        | TPVQYSQQQNSPQK                  | K                   | H               | 95.00%                                  | 3.16                     | 0.323                  | 0                                | 1                                | 0                                | 0                                | 2                           | 1,712.76                           | 347                 | 360                | TRUE     |                |
| SNU216_PC1_03     | Isoform Long of Antigen KI-67                    | IP000004233,IP000301293    | 358,695.80                    | 100.00%                            | 5                         | 6                        | 6                       | 0.04%                       | 2.95%                        | TSGETTQTHTEPTGDSK               | R                   | S               | 91.90%                                  | 2.19                     | 0.269                  | 0                                | 1                                | 1                                | 0                                | 2                           | 1,856.75                           | 2504                | 2520               | TRUE     |                |
| SNU216_PC1_03     | Isoform 1 of Chromosome-associated kinesin KIF   | IP00178150                 | 139,883.80                    | 99.80%                             | 1                         | 1                        | 1                       | 0.01%                       | 0.81%                        | NQSLVEENEK                      | K                   | L               | 95.00%                                  | 2.42                     | 0.314                  | 0                                | 1                                | 0                                | 0                                | 2                           | 1,269.54                           | 392                 | 401                | TRUE     |                |
| SNU216_PC1_03     | Isoform 1 of Retinoblastoma-binding protein 6    | IP000337315,IP000376283,IP | 201,569.30                    | 100.00%                            | 5                         | 6                        | 6                       | 0.04%                       | 3.68%                        | KVTGTGSSSLVDVYSTSTGGSPVRK       | R                   | S               | 95.00%                                  | 7.55                     | 0.0861                 | 0                                | 0                                | 1                                | 0                                | 2                           | 2,869.35                           | 1254                | 1281               | TRUE     |                |
| SNU216_PC1_03     | Isoform 1 of Retinoblastoma-binding protein 6    | IP000337315,IP000376283,IP | 201,569.30                    | 100.00%                            | 5                         | 6                        | 6                       | 0.04%                       | 3.68%                        | LEVTEIVKPSPK                    | K                   | R               | 95.00%                                  | 3.41                     | 0.362                  | 0                                | 0                                | 1                                | 0                                | 2                           | 1,419.75                           | 1170                | 1181               | TRUE     |                |
| SNU216_PC1_03     | Isoform 1 of Retinoblastoma-binding protein 6    | IP000337315,IP000376283,IP | 201,569.30                    | 100.00%                            | 5                         | 6                        | 6                       | 0.04%                       | 3.68%                        | NQLPLMRSPISR                    | R                   | Q               | 95.00%                                  | 2.63                     | 0.18                   | 0                                | 1                                | 0                                | 0                                | 2                           | 1,491.75                           | 353                 | 364                | TRUE     |                |
| SNU216_PC1_03     | Isoform 1 of Retinoblastoma-binding protein 6    | IP000337315,IP000376283,IP | 201,569.30                    | 100.00%                            | 5                         | 6                        | 6                       | 0.04%                       | 3.68%                        | VTGTGESSLTDVYSTSTGGSPVR         | K                   | K               | 95.00%                                  | 4.09                     | 0.0138                 | 0                                | 1                                | 0                                | 0                                | 2                           | 2,613.16                           | 1255                | 1280               | TRUE     |                |
| SNU216_PC1_03     | Isoform 1 of Retinoblastoma-binding protein 6    | IP000337315,IP000376283,IP | 201,569.30                    | 100.00%                            | 5                         | 6                        | 6                       | 0.04%                       | 3.68%                        | WDKDDFSEEDVVK                   | K                   | S               | 95.00%                                  | 2.84                     | 0.302                  | 0                                | 0                                | 1                                | 0                                | 2                           | 1,850.70                           | 1321                | 1334               | TRUE     |                |
| SNU216_PC1_03     | Pericentriol material 1                          | IP00006213                 | 228,705.30                    | 100.00%                            | 4                         | 5                        | 5                       | 0.03%                       | 3.85%                        | DQHLLNSSSSPQR                   | R                   | S               | 95.00%                                  | 2.44                     | 0.237                  | 0                                | 1                                | 0                                | 0                                | 2                           | 1,549.64                           | 423                 | 435                | TRUE     |                |
| SNU216_PC1_03     | Pericentriol material 1                          | IP00006213                 | 228,705.30                    | 100.00%                            | 4                         | 5                        | 5                       | 0.03%                       | 3.85%                        | ILEDHGGSPAGEIDEDKDKDETETVK      | R                   | Q               | 95.00%                                  | 6.48                     | 0.584                  | 0                                | 0                                | 1                                | 1                                | 2                           | 2,965.28                           | 1724                | 1749               | TRUE     |                |
| SNU216_PC1_03     | Pericentriol material 1                          | IP00006213                 | 228,705.30                    | 100.00%                            | 4                         | 5                        | 5                       | 0.03%                       | 3.85%                        | KDEETEESEYDSEHENSEFVTNIR        | R                   | N               | 92.70%                                  | 3.37                     | 0.132                  | 0                                | 0                                | 1                                | 0                                | 2                           | 2,946.18                           | 1277                | 550                | TRUE     |                |
| SNU216_PC1_03     | Pericentriol material 1                          | IP00006213                 | 228,705.30                    | 100.00%                            | 4                         | 5                        | 5                       | 0.03%                       | 3.85%                        | VYNDISPESSPGVGR                 | R                   | R               | 95.00%                                  | 3.21                     | 0.403                  | 0                                | 1                                | 0                                | 0                                | 2                           | 1,594.71                           | 60                  | 74                 | TRUE     |                |
| SNU216_PC1_03     | KIAA0284 protein                                 | IP00180625                 | 163,628.60                    | 100.00%                            | 6                         | 10                       | 10                      | 0.06%                       | 5.20%                        | GKHEDGTQSDSEDLPAK               | K                   | A               | 95.00%                                  | 3.96                     | 0.325                  | 0                                | 1                                | 1                                | 2                                | 2,030.85                    | 281                                | 298                 | TRUE               |          |                |
| SNU216_PC1_03     | KIAA0284 protein                                 | IP00180625                 | 163,628.60                    | 100.00%                            | 6                         | 10                       | 10                      | 0.06%                       | 5.20%                        | HEDGTQSDSEDLPAK                 | K                   | A               | 95.00%                                  | 3.19                     | 0.459                  | 0                                | 1                                | 1                                | 0                                | 2                           | 1,708.67                           | 284                 | 298                | TRUE     |                |
| SNU216_PC1_03     | KIAA0284 protein                                 | IP00180625                 | 163,628.60                    | 100.00%                            | 6                         | 10                       | 10                      | 0.06%                       | 5.20%                        | LGDASDTEAADGER                  | R                   | G               | 95.00%                                  | 2.43                     | 0.398                  | 0                                | 1                                | 0                                | 0                                | 2                           | 1,486.57                           | 1061                | 1074               | TRUE     |                |
| SNU216_PC1_03     | KIAA0284 protein                                 | IP00180625                 | 163,628.60                    | 100.00%                            | 6                         | 10                       | 10                      | 0.06%                       | 5.20%                        | MMVQLRGRSPPEPDGPAPAFLR          | R                   | Q               | 95.00%                                  | 2.83                     | 0.345                  | 0                                | 0                                | 1                                | 1                                | 2                           | 2,484.26                           | 774                 | 795                | TRUE     |                |
| SNU216_PC1_03     | KIAA0284 protein                                 | IP00180625                 | 163,628.60                    | 100.00%                            | 6                         | 10                       | 10                      | 0.06%                       | 5.20%                        | RRSPOEGPTWR                     | R                   | G               | 95.00%                                  | 2.7                      | 0.297                  | 0                                | 0                                | 1                                | 0                                | 2                           | 1,536.71                           | 700                 | 711                | TRUE     |                |
| SNU216_PC1_03     | KIAA0284 protein                                 | IP00180625                 | 163,628.60                    | 100.00%                            | 6                         | 10                       | 10                      | 0.06%                       | 5.20%                        | QSFFTHSPSGDPK                   | R                   | A               | 89.10%                                  | 1.99                     | 0.198                  | 0                                | 1                                | 0                                | 0                                | 2                           | 1,454.59                           | 349                 | 361                | TRUE     |                |
| SNU216_PC1_03     | dedicator of cytokinesis 7                       | IP000513791                | 239,427.70                    | 99.50%                             | 2                         | 2                        | 3                       | 0.02%                       | 2.28%                        | LPNTYPNSSSPRGGLGSSVHYATMAR      | R                   | S               | 90.70%                                  | 6.49                     | 0.0007                 | 0                                | 0                                | 1                                | 0                                | 2                           | 2,768.25                           | 855                 | 881                | TRUE     |                |
| SNU216_PC1_03     | dedicator of cytokinesis 7                       | IP000513791                | 239,427.70                    | 99.50%                             | 2                         | 2                        | 3                       | 0.02%                       | 2.28%                        | SLSNSPNDSIGTPTSPDDEVIR          | R                   | S               | 95.00%                                  | 5.03                     | 0                      | 0                                | 2                                | 0                                | 0                                | 2                           | 2,267.97                           | 896                 | 916                | TRUE     |                |
| SNU216_PC1_03     | Isoform 2 of Adenosine 3'-phospho 5'-phosphos    | IP000384867,IP000642271    | 47,515.30                     | 100.00%                            | 3                         | 3                        | 3                       | 0.02%                       | 3.05%                        | AVPVESPQVKV                     | K                   | -               | 91.20%                                  | 1.92                     | 0.268                  | 0                                | 1                                | 0                                | 0                                | 2                           | 1,232.63                           | 422                 | 432                | TRUE     |                |
| SNU216_PC1_03     | Isoform 2 of Adenosine 3'-phospho 5'-phosphos    | IP000384867,IP000642271    | 47,515.30                     | 100.00%                            | 3                         | 3                        | 3                       | 0.02%                       | 3.05%                        | KAVPVESPQVK                     | K                   | -               | 95.00%                                  | 2.42                     | 0.449                  | 0                                | 1                                | 0                                | 0                                | 2                           | 1,261.66                           | 421                 | 431                | TRUE     |                |
| SNU216_PC1_03     | Isoform 2 of Adenosine 3'-phospho 5'-phosphos    | IP000384867,IP000642271    | 47,515.30                     | 100.00%                            | 3                         | 3                        | 3                       | 0.02%                       | 3.05%                        | KAVPVESPQVK                     | K                   | -               | 95.00%                                  | 2.26                     | 0.325                  | 0                                | 1                                | 0                                | 0                                | 2                           | 1,360.72                           | 421                 | 432                | TRUE     |                |
| SNU216_PC1_03     | Chromatin assembly factor 1 subunit B            | IP00011857                 | 61,492.80                     | 99.80%                             | 2                         | 2                        | 2                       | 0.01%                       | 5.55%                        | GSSPGPRPVEGTASR                 | R                   | T               | 95.00%                                  | 2.65                     | 0.254                  | 0                                | 0                                | 1                                | 0                                | 2                           | 1,631.75                           | 408                 | 423                | TRUE     |                |
| SNU216_PC1_03     | Chromatin assembly factor 1 subunit B            | IP00011857                 | 61,492.80                     | 99.80%                             | 2                         | 2                        | 2                       | 0.01%                       | 5.55%                        | TQDPSSPGTTPQAR                  | R                   | Q               | 95.00%                                  | 2.67                     | 0.282                  | 0                                | 1                                | 0                                | 0                                | 2                           | 1,619.71                           | 424                 | 438                | TRUE     |                |
| SNU216_PC2_03     | PREDICTED: widely-interspaced zinc finger motifs | IP000295502                | 170,212.00                    | 99.90%                             | 2                         | 2                        | 2                       | 0.01%                       | 0.83%                        | KTPLALAGSPTRK                   | K                   | N               | 95.00%                                  | 2.64                     | 0.19                   | 0                                | 1                                | 0                                | 0                                | 2                           | 1,360.72                           | 906                 | 918                | TRUE     |                |
| SNU216_PC2_03     | PREDICTED: widely-interspaced zinc finger motifs | IP000295502                | 170,212.00                    | 99.90%                             | 2                         | 2                        | 2                       | 0.01%                       | 0.83%                        | TPLALAGSPTRK                    | K                   | N               | 95.00%                                  | 2.82                     | 0.34                   | 0                                | 1                                | 0                                | 0                                | 2                           | 1,232.63                           | 907                 | 918                | TRUE     |                |
| SNU216_PC2_03     | Isoform 1 of Regulatory associated protein of mT | IP000166044                | 149,039.20                    | 99.80%                             | 2                         | 2                        | 2                       | 0.01%                       | 3.37%                        | GVHIIHQAGGSPASSSTSSSLTNDVAK     | K                   | Q               | 95.00%                                  | 5.29                     | 0.145                  | 0                                | 0                                | 1                                | 0                                | 2                           | 2,672.23                           | 868                 | 894                | TRUE     |                |
| SNU216_PC2_03     | Isoform 1 of Regulatory associated protein of mT | IP000166044                | 149,039.20                    | 99.80%                             | 2                         | 2                        | 2                       | 0.01%                       | 3.37%                        | VLDTSSLTQASAPASPTNK             | R                   | G               | 95.00%                                  | 4.22                     | 0.0584                 | 0                                | 1                                | 0                                | 0                                | 2                           | 1,896.90                           | 850                 | 867                | TRUE     |                |
| SNU216_PC2_03     | Eukaryotic translation initiation factor 4B      | IP00012079                 | 69,226.80                     | 100.00%                            | 2                         | 2                        | 2                       | 0.01%                       | 6.87%                        | SPPYTAFGLNPLYDVTESIKEFFR        | K                   | G               | 95.00%                                  | 5.82                     | 0.444                  | 0                                | 0                                | 1                                | 0                                | 2                           | 3,000.41                           | 93                  | 117                | TRUE     |                |
| SNU216_PC2_03     | Eukaryotic translation initiation factor 4B      | IP00012079                 | 69,226.80                     | 100.00%                            | 2                         | 2                        | 2                       | 0.01%                       | 6.87%                        | QSQSDTQEPTSTGGGK                | R                   | V               | 95.00%                                  | 3.53                     | 0.512                  | 0                                | 1                                | 0                                | 0                                | 2                           | 1,760.70                           | 495                 | 511                | TRUE     |                |
| SNU216_PC2_03     | PREDICTED: hypothetical protein LOC23307         | IP000401282,IP000739371    | 145,905.00                    | 100.00%                            | 3                         | 3                        | 3                       | 0.02%                       | 5.01%                        | ERPESPMVPSEQVVEAFLPPQALTSQDI    | R                   | R               | 95.00%                                  | 3.66                     | 0.332                  | 0                                | 0                                | 0                                | 1                                | 2                           | 3,690.75                           | 1093                | 1125               | TRUE     |                |
| SNU216_PC2_03     | PREDICTED: hypothetical protein LOC23307         | IP000401282,IP000739371    | 145,905.00                    | 100.00%                            | 3                         | 3                        | 3                       | 0.02%                       | 5.01%                        | RPSQEQSASASQDQQAFLNIR           | R                   | E               | 95.00%                                  | 5.12                     | 0.495                  | 0                                | 0                                | 1                                | 0                                | 2                           | 2,276.04                           | 1072                | 1092               | TRUE     |                |
| SNU216_PC2_03     | PREDICTED: hypothetical protein LOC23307         | IP000401282,IP000739371    | 145,905.00                    | 100.00%                            | 3                         | 3                        | 3                       | 0.02%                       | 5.01%                        | SSLSGDEEDLFK                    | R                   | G               | 95.00%                                  | 2.59                     | 0.269                  | 0                                | 1                                | 0                                | 0                                | 2                           | 1,535.62                           | 1279                | 1291               | TRUE     |                |
| SNU216_PC2_03     | DNA ligase 1                                     | IP000219841                | 101,738.20                    | 100.00%                            | 9                         | 9                        | 11                      | 0.07%                       | 12.40%                       | AETPTESVSEPAVATK                | K                   | Q               | 95.00%                                  | 3.48                     | 0.48                   | 0                                | 2                                | 0                                | 0                                | 2                           | 1,754.77                           | 193                 | 208                | TRUE     |                |
| SNU216_PC2_03     | DNA ligase 1                                     | IP000219841                | 101,738.20                    | 100.00%                            | 9                         | 9                        | 11                      | 0.07%                       | 12.40%                       | EGEDGQPTTPPKPLK                 | K                   | T               | 95.00%                                  | 2.56                     | 0.253                  | 0                                | 0                                | 1                                | 0                                | 2                           | 1,788.81                           | 174                 | 189                | TRUE     |                |
| SNU216_PC2_03     | DNA ligase 1                                     | IP000219841                | 101,738.20                    | 100.00%                            | 9                         | 9                        | 11                      | 0.07%                       | 12.40%                       | ESLTEAEVATEKEGEDGQPTTPPKPLK     | K                   | T               | 95.00%                                  | 4.38                     | 0.208                  | 0                                | 0                                | 1                                | 0                                | 2                           | 3,076.43                           | 162                 | 189                | TRUE     |                |
| SNU216_PC2_03     | DNA ligase 1                                     | IP000219841                | 101,738.20                    | 100.00%                            | 9                         | 9                        | 11                      | 0.07%                       | 12.40%                       | EWNGVVSSEDSPVK                  | R                   | R               | 95.00%                                  | 3.37                     | 0.307                  | 0                                | 0                                | 1                                | 0                                | 2                           | 1,612.69                           | 41                  | 54                 | TRUE     |                |
| SNU216_PC2_03     | DNA ligase 1                                     | IP000219841                | 101,738.20                    | 100.00%                            | 9                         | 9                        | 11                      | 0.07%                       | 12.40%                       | QSQIQNQSGEDSGSDPEDTY            | K                   | -               | 95.00%                                  | 2.48                     | 0.199                  | 0                                | 1                                | 0                                | 0                                | 2                           | 2,385.84                           | 900                 | 919                | TRUE     |                |
| SNU216_PC2_03     | DNA ligase 1                                     | IP000219841                | 101,738.20                    | 100.00%                            | 9                         | 9                        | 11                      | 0.07%                       | 12.40%                       | RTQEVLEEQSEDEDR                 | K                   | E               | 95.00%                                  | 4                        | 0.204                  | 0                                | 0                                | 1                                | 0                                | 2                           | 2,055.89                           | 131                 | 146                | TRUE     |                |
| SNU216_PC2_03     | DNA ligase 1                                     | IP000219841                | 101,738.20                    | 100.00%                            | 9                         | 9                        | 11                      | 0.07%                       | 12.40%                       | RTQEVLEEQSEDEREAK               | K                   | R               | 95.00%                                  | 4.09                     | 0.225                  | 0                                | 0                                | 1                                | 0                                | 2                           | 2,384.06                           | 131                 | 149                | TRUE     |                |
| SNU216_PC2_03     | DNA ligase 1                                     | IP000219841                | 101,738.20                    | 100.00%                            | 9                         | 9                        | 11                      | 0.07%                       | 12.40%                       | TIQEVLEEQSEDEDR                 | R                   | E               | 95.00%                                  | 3.32                     | 0.271                  | 0                                | 1                                | 0                                | 0                                | 2</                         |                                    |                     |                    |          |                |

Supplemental Table 2. A list of all phosphorylated peptides identified in SNU216 and SNU216-LR.

| MS/MS sample name | Protein name                                     | Protein accession numbers | Protein molecular weight (Da) | Protein identification probability | Number of unique peptides | Number of unique spectra | Number of total spectra | Percentage of total spectra | Percentage sequence coverage | Peptide sequence                | Previous amino acid | Next amino acid | Best Peptide identification probability | Best SEQUEST XCorr score | Best SEQUEST DcN score | Number of identified +1H spectra | Number of identified +2H spectra | Number of identified +3H spectra | Number of identified +4H spectra | Number of enzymatic termini | Calculate d +1H Peptide Mass (AMU) | Peptide start index | Peptide stop index | Assigned | Other Proteins |
|-------------------|--------------------------------------------------|---------------------------|-------------------------------|------------------------------------|---------------------------|--------------------------|-------------------------|-----------------------------|------------------------------|---------------------------------|---------------------|-----------------|-----------------------------------------|--------------------------|------------------------|----------------------------------|----------------------------------|----------------------------------|----------------------------------|-----------------------------|------------------------------------|---------------------|--------------------|----------|----------------|
| SNU216_Pc2_03     | Filamin A, alpha                                 | IP00302592;IP00333541     | 280,620.20                    | 100.00%                            | 2                         | 2                        | 2                       | 0.01%                       | 1.48%                        | FNEEHPDSPFVVPASPSGDAR           | K                   | R               | 95.00%                                  | 4.06                     | 0.372                  | 0                                | 0                                | 1                                | 0                                | 2                           | 2,547.16                           | 2310                | 2332               | TRUE     |                |
| SNU216_Pc2_03     | Lamin-B2                                         | IP00009771                | 69,949.40                     | 99.70%                             | 1                         | 1                        | 1                       | 0.01%                       | 1.94%                        | AGGPAITPLSPTR                   | R                   | L               | 93.60%                                  | 2.13                     | 0.203                  | 0                                | 1                                | 0                                | 0                                | 2                           | 1,204.57                           | 29                  | 40                 | TRUE     |                |
| SNU216_Pc2_03     | Isoform 2 of Supervillin                         | IP00018370                | 200,795.40                    | 100.00%                            | 7                         | 7                        | 7                       | 0.05%                       | 5.70%                        | DSSFTEVPRSPK                    | R                   | H               | 95.00%                                  | 3.13                     | 0.431                  | 0                                | 1                                | 0                                | 0                                | 2                           | 1,429.64                           | 236                 | 247                | TRUE     |                |
| SNU216_Pc2_03     | Isoform 2 of Supervillin                         | IP00018370                | 200,795.40                    | 100.00%                            | 7                         | 7                        | 7                       | 0.05%                       | 5.70%                        | QAHDLSPAEASSTSFSGR              | R                   | D               | 95.00%                                  | 3.87                     | 0.379                  | 0                                | 0                                | 1                                | 0                                | 2                           | 2,161.92                           | 216                 | 235                | TRUE     |                |
| SNU216_Pc2_03     | Isoform 2 of Supervillin                         | IP00018370                | 200,795.40                    | 100.00%                            | 7                         | 7                        | 7                       | 0.05%                       | 5.70%                        | SPSFGDPQLSPPEAR                 | R                   | P               | 95.00%                                  | 2.82                     | 0.282                  | 0                                | 1                                | 0                                | 0                                | 2                           | 1,567.68                           | 261                 | 274                | TRUE     |                |
| SNU216_Pc2_03     | Isoform 2 of Supervillin                         | IP00018370                | 200,795.40                    | 100.00%                            | 7                         | 7                        | 7                       | 0.05%                       | 5.70%                        | SPVEMDEDFDVIFDPYAPK             | R                   | L               | 95.00%                                  | 4.15                     | 0.529                  | 0                                | 1                                | 0                                | 0                                | 2                           | 2,293.96                           | 896                 | 914                | TRUE     |                |
| SNU216_Pc2_03     | Isoform 2 of Supervillin                         | IP00018370                | 200,795.40                    | 100.00%                            | 7                         | 7                        | 7                       | 0.05%                       | 5.70%                        | SDVYNMPRSPVEMDEDFDVIFDPYAPK     | R                   | L               | 95.00%                                  | 4.26                     | 0.386                  | 0                                | 0                                | 1                                | 0                                | 2                           | 3,256.39                           | 888                 | 914                | TRUE     |                |
| SNU216_Pc2_03     | Isoform 2 of Supervillin                         | IP00018370                | 200,795.40                    | 100.00%                            | 7                         | 7                        | 7                       | 0.05%                       | 5.70%                        | TPTGEGLLDSPK                    | K                   | T               | 95.00%                                  | 2.87                     | 0.406                  | 0                                | 1                                | 0                                | 0                                | 2                           | 1,381.63                           | 685                 | 697                | TRUE     |                |
| SNU216_Pc2_03     | Isoform 2 of Supervillin                         | IP00018370                | 200,795.40                    | 100.00%                            | 7                         | 7                        | 7                       | 0.05%                       | 5.70%                        | YGSFEEAEASYFILNR                | K                   | A               | 95.00%                                  | 3.33                     | 0.129                  | 0                                | 1                                | 0                                | 0                                | 2                           | 1,925.83                           | 540                 | 555                | TRUE     |                |
| SNU216_Pc2_03     | Novel protein                                    | IP00640055                | 81,090.60                     | 99.80%                             | 2                         | 2                        | 3                       | 0.02%                       | 3.50%                        | RPAGGRPPSPAMGK                  | R                   | R               | 95.00%                                  | 2.89                     | 0.454                  | 0                                | 1                                | 0                                | 0                                | 2                           | 1,448.68                           | 716                 | 729                | TRUE     |                |
| SNU216_Pc2_03     | Novel protein                                    | IP00640055                | 81,090.60                     | 99.80%                             | 2                         | 2                        | 3                       | 0.02%                       | 3.50%                        | SPSPAHLPPDPK                    | R                   | V               | 95.00%                                  | 2.41                     | 0.349                  | 0                                | 2                                | 0                                | 0                                | 2                           | 1,340.59                           | 604                 | 615                | TRUE     |                |
| SNU216_Pc2_03     | ligase III, DNA, ATP-dependent isoform alpha pre | IP00000156;IP00029081.IP  | 95,804.10                     | 100.00%                            | 3                         | 3                        | 4                       | 0.03%                       | 3.37%                        | FSGFSAKPNNSGEAPSSPTPK           | K                   | R               | 95.00%                                  | 4.01                     | 0.413                  | 0                                | 0                                | 1                                | 0                                | 2                           | 2,186.98                           | 139                 | 159                | TRUE     |                |
| SNU216_Pc2_03     | ligase III, DNA, ATP-dependent isoform alpha pre | IP00000156;IP00029081.IP  | 95,804.10                     | 100.00%                            | 3                         | 3                        | 4                       | 0.03%                       | 3.37%                        | FSGFSAKPNNSGEAPSSPTPK           | R                   | R               | 95.00%                                  | 5.19                     | 0.482                  | 0                                | 0                                | 2                                | 0                                | 2                           | 2,315.07                           | 138                 | 159                | TRUE     |                |
| SNU216_Pc2_03     | ligase III, DNA, ATP-dependent isoform alpha pre | IP00000156;IP00029081.IP  | 95,804.10                     | 100.00%                            | 3                         | 3                        | 4                       | 0.03%                       | 3.37%                        | LTITGQVTPVK                     | K                   | G               | 95.00%                                  | 2.74                     | 0.269                  | 0                                | 1                                | 0                                | 0                                | 2                           | 1,311.66                           | 115                 | 126                | TRUE     |                |
| SNU216_Pc2_03     | Isoform Beta of Striatin-3                       | IP00011461                | 87,661.80                     | 100.00%                            | 1                         | 1                        | 1                       | 0.01%                       | 4.25%                        | SSGDVLETFNLENADSDSEEDNMEIGI     | R                   | D               | 95.00%                                  | 5.55                     | 0.593                  | 0                                | 0                                | 1                                | 0                                | 2                           | 3,840.55                           | 240                 | 273                | TRUE     |                |
| SNU216_Pc2_03     | SCC-112 protein                                  | IP00303063                | 150,835.50                    | 99.80%                             | 1                         | 1                        | 1                       | 0.01%                       | 1.27%                        | AAVGQESPGLEAGNAK                | R                   | A               | 95.00%                                  | 3.38                     | 0.180                  | 0                                | 0                                | 1                                | 0                                | 2                           | 1,635.74                           | 1299                | 1315               | TRUE     |                |
| SNU216_Pc2_03     | hypothetical protein LOC168850                   | IP00396098                | 75,236.80                     | 99.80%                             | 2                         | 2                        | 2                       | 0.01%                       | 3.61%                        | DSITPDIAIKPGQPLFLDSISPK         | R                   | K               | 95.00%                                  | 4.82                     | 0.461                  | 0                                | 0                                | 1                                | 0                                | 2                           | 2,520.26                           | 316                 | 338                | TRUE     |                |
| SNU216_Pc2_03     | hypothetical protein LOC168850                   | IP00396098                | 75,236.80                     | 99.80%                             | 2                         | 2                        | 2                       | 0.01%                       | 3.61%                        | DSITPDIAIKPGQPLFLDSISPK         | R                   | S               | 95.00%                                  | 3.83                     | 0.352                  | 0                                | 0                                | 1                                | 0                                | 2                           | 2,648.36                           | 316                 | 339                | TRUE     |                |
| SNU216_Pc2_03     | palladin                                         | IP00292009                | 122,047.90                    | 100.00%                            | 2                         | 2                        | 2                       | 0.01%                       | 2.53%                        | GRSPSPSGHPHYR                   | R                   | R               | 95.00%                                  | 3.15                     | 0.376                  | 0                                | 0                                | 1                                | 2                                | 1,686.74                    | 875                                | 888                 | TRUE               |          |                |
| SNU216_Pc2_03     | palladin                                         | IP00292009                | 122,047.90                    | 100.00%                            | 2                         | 2                        | 2                       | 0.01%                       | 2.53%                        | SRDSPGDENEPIQER                 | R                   | F               | 80.20%                                  | 2.71                     | 0.194                  | 0                                | 0                                | 1                                | 0                                | 2                           | 1,711.69                           | 894                 | 907                | TRUE     |                |
| SNU216_Pc2_03     | Isoform F of SON protein                         | IP00000192;IP000217930.IP | 252,269.30                    | 100.00%                            | 1                         | 1                        | 1                       | 0.01%                       | 0.54%                        | ESDQTLAALLSPK                   | K                   | E               | 95.00%                                  | 2.72                     | 0.342                  | 0                                | 1                                | 0                                | 0                                | 2                           | 1,452.70                           | 1687                | 1699               | TRUE     |                |
| SNU216_Pc2_03     | H326                                             | IP00290071;IP00640954.IP  | 23,518.60                     | 99.80%                             | 1                         | 1                        | 1                       | 0.01%                       | 3.52%                        | VHDSREEEEEEEEEEQPR              | R                   | R               | 95.00%                                  | 7.64                     | 0.61                   | 0                                | 0                                | 1                                | 0                                | 2                           | 2,752.04                           | 95                  | 115                | TRUE     |                |
| SNU216_Pc2_03     | Isoform 2 of SWI/SNF-related matrix-associated a | IP00150057;IP000216047    | 124,841.60                    | 100.00%                            | 2                         | 2                        | 2                       | 0.01%                       | 2.74%                        | DMDESPVPNVNEEVLTK               | K                   | T               | 95.00%                                  | 2.95                     | 0.391                  | 0                                | 0                                | 1                                | 0                                | 2                           | 2,075.92                           | 342                 | 359                | TRUE     |                |
| SNU216_Pc2_03     | Isoform 2 of SWI/SNF-related matrix-associated a | IP00150057;IP000216047    | 124,841.60                    | 100.00%                            | 2                         | 2                        | 2                       | 0.01%                       | 2.74%                        | KRSPSPSPTEPAK                   | R                   | K               | 91.00%                                  | 1.9                      | 0.236                  | 0                                | 0                                | 1                                | 0                                | 2                           | 1,621.64                           | 300                 | 312                | TRUE     |                |
| SNU216_Pc2_03     | Isoform 1 of Microtubule-associated protein 2    | IP00003842;IP00010728.IP  | 199,540.80                    | 100.00%                            | 3                         | 3                        | 3                       | 0.02%                       | 2.79%                        | DGSEPAAPSPEREVALSEYK            | K                   | T               | 92.80%                                  | 2.69                     | 0.191                  | 0                                | 0                                | 1                                | 0                                | 2                           | 2,420.99                           | 1345                | 1365               | TRUE     |                |
| SNU216_Pc2_03     | Isoform 1 of Microtubule-associated protein 2    | IP00003842;IP00010728.IP  | 199,540.80                    | 100.00%                            | 3                         | 3                        | 3                       | 0.02%                       | 2.79%                        | TSPESSLIQDEIAVK                 | K                   | L               | 95.00%                                  | 3.2                      | 0.524                  | 0                                | 1                                | 0                                | 0                                | 2                           | 1,825.85                           | 1153                | 1168               | TRUE     |                |
| SNU216_Pc2_03     | Isoform 1 of Microtubule-associated protein 2    | IP00003842;IP00010728.IP  | 199,540.80                    | 100.00%                            | 3                         | 3                        | 3                       | 0.02%                       | 2.79%                        | VDHGAIEITQSPGR                  | R                   | S               | 95.00%                                  | 3.24                     | 0.476                  | 0                                | 1                                | 0                                | 0                                | 2                           | 1,559.72                           | 1772                | 1785               | TRUE     |                |
| SNU216_Pc2_03     | Isoform 1 of Sympleskin                          | IP00023344;IP00746292     | 126,504.90                    | 100.00%                            | 2                         | 2                        | 2                       | 0.01%                       | 3.30%                        | ETAAAGGLTKLEERSQPLVGEDAMK       | K                   | T               | 95.00%                                  | 4.59                     | 0.336                  | 0                                | 0                                | 1                                | 0                                | 2                           | 2,879.39                           | 1098                | 1124               | TRUE     |                |
| SNU216_Pc2_03     | Isoform 1 of Sympleskin                          | IP00023344;IP00746292     | 126,504.90                    | 100.00%                            | 2                         | 2                        | 2                       | 0.01%                       | 3.30%                        | SQOTLAPVGEDAMKTPSPAEDAREPEAK    | R                   | G               | 95.00%                                  | 5.15                     | 0.339                  | 0                                | 0                                | 0                                | 1                                | 2                           | 3,153.39                           | 1111                | 1139               | TRUE     |                |
| SNU216_Pc2_03     | DNA-directed RNA polymerase, mitochondrial pre   | IP000298738               | 140,214.60                    | 99.50%                             | 2                         | 2                        | 2                       | 0.01%                       | 2.25%                        | QKNGFPNPNFNLSDSSHMMLTALHCYRK    | K                   | K               | 92.30%                                  | 4.18                     | 0.193                  | 0                                | 0                                | 0                                | 1                                | 2                           | 3,393.44                           | 1130                | 1156               | TRUE     |                |
| SNU216_Pc2_03     | DNA-directed RNA polymerase, mitochondrial pre   | IP000298738               | 140,214.60                    | 99.50%                             | 2                         | 2                        | 2                       | 0.01%                       | 2.25%                        | QKNGFPNPNFNLSDSSHMMLTALHCYRK    | K                   | G               | 93.40%                                  | 3.68                     | 0.157                  | 0                                | 0                                | 0                                | 1                                | 2                           | 3,521.54                           | 1130                | 1157               | TRUE     |                |
| SNU216_Pc2_03     | Junction plakoglobin                             | IP00554711                | 81,499.50                     | 100.00%                            | 3                         | 4                        | 4                       | 0.03%                       | 3.63%                        | ALMGSPQLVAAVVR                  | R                   | T               | 95.00%                                  | 2.38                     | 0.286                  | 0                                | 1                                | 0                                | 0                                | 2                           | 1,491.78                           | 177                 | 190                | TRUE     |                |
| SNU216_Pc2_03     | Junction plakoglobin                             | IP00554711                | 81,499.50                     | 100.00%                            | 3                         | 4                        | 4                       | 0.03%                       | 3.63%                        | KRVSVELTNSLKF                   | R                   | H               | 95.00%                                  | 3.23                     | 0.24                   | 0                                | 0                                | 1                                | 0                                | 2                           | 1,600.85                           | 660                 | 672                | TRUE     |                |
| SNU216_Pc2_03     | Junction plakoglobin                             | IP00554711                | 81,499.50                     | 100.00%                            | 3                         | 4                        | 4                       | 0.03%                       | 3.63%                        | KRVSVELTNSLKF                   | K                   | H               | 95.00%                                  | 2.92                     | 0.258                  | 0                                | 1                                | 1                                | 0                                | 2                           | 1,472.75                           | 661                 | 672                | TRUE     |                |
| SNU216_Pc2_03     | Microtubule-associated protein 4 isoform 1 varia | IP000745518               | 122,943.20                    | 100.00%                            | 11                        | 12                       | 17                      | 0.11%                       | 14.60%                       | ASPSKPASAPASR                   | R                   | S               | 95.00%                                  | 3.17                     | 0.412                  | 0                                | 0                                | 1                                | 0                                | 2                           | 1,306.62                           | 814                 | 826                | TRUE     |                |
| SNU216_Pc2_03     | Microtubule-associated protein 4 isoform 1 varia | IP000745518               | 122,943.20                    | 100.00%                            | 11                        | 12                       | 17                      | 0.11%                       | 14.60%                       | DGVLTLANNVTPAKDVPLSETATVPVKD    | K                   | G               | 95.00%                                  | 5.21                     | 0.359                  | 0                                | 0                                | 0                                | 1                                | 2                           | 4,211.12                           | 589                 | 627                | TRUE     |                |
| SNU216_Pc2_03     | Microtubule-associated protein 4 isoform 1 varia | IP000745518               | 122,943.20                    | 100.00%                            | 11                        | 12                       | 17                      | 0.11%                       | 14.60%                       | DMESPTKLDVTLAK                  | K                   | D               | 95.00%                                  | 2.62                     | 0.32                   | 0                                | 0                                | 1                                | 0                                | 2                           | 1,627.77                           | 305                 | 318                | TRUE     |                |
| SNU216_Pc2_03     | Microtubule-associated protein 4 isoform 1 varia | IP000745518               | 122,943.20                    | 100.00%                            | 11                        | 12                       | 17                      | 0.11%                       | 14.60%                       | DMSPLSETEMALGK                  | K                   | D               | 95.00%                                  | 3.16                     | 0.422                  | 0                                | 4                                | 0                                | 0                                | 2                           | 1,588.66                           | 533                 | 546                | TRUE     |                |
| SNU216_Pc2_03     | Microtubule-associated protein 4 isoform 1 varia | IP000745518               | 122,943.20                    | 100.00%                            | 11                        | 12                       | 17                      | 0.11%                       | 14.60%                       | DMSPLSETEMALGKDVTPTPEVEVLVK     | K                   | N               | 95.00%                                  | 4.35                     | 0.339                  | 0                                | 0                                | 3                                | 0                                | 2                           | 3,106.50                           | 533                 | 560                | TRUE     |                |
| SNU216_Pc2_03     | Microtubule-associated protein 4 isoform 1 varia | IP000745518               | 122,943.20                    | 100.00%                            | 11                        | 12                       | 17                      | 0.11%                       | 14.60%                       | DVTPPPTEVVLIK                   | K                   | N               | 95.00%                                  | 2.4                      | 0.338                  | 0                                | 1                                | 0                                | 0                                | 2                           | 1,616.82                           | 547                 | 560                | TRUE     |                |
| SNU216_Pc2_03     | Microtubule-associated protein 4 isoform 1 varia | IP000745518               | 122,943.20                    | 100.00%                            | 11                        | 12                       | 17                      | 0.11%                       | 14.60%                       | ETERASPIKMDLAPSK                | K                   | D               | 95.00%                                  | 2.8                      | 0.199                  | 0                                | 0                                | 1                                | 0                                | 2                           | 1,852.89                           | 407                 | 422                | TRUE     |                |
| SNU216_Pc2_03     | Microtubule-associated protein 4 isoform 1 varia | IP000745518               | 122,943.20                    | 100.00%                            | 11                        | 12                       | 17                      | 0.11%                       | 14.60%                       | GISEDSHLESLQGVGQSAAPTFMISPETVTG | K                   | K               | 95.00%                                  | 6.96                     | 0.0351                 | 0                                | 0                                | 1                                | 1                                | 2                           | 3,569.64                           | 628                 | 661                | TRUE     |                |
| SNU216_Pc2_03     | Microtubule-associated protein 4 isoform 1 varia | IP000745518               | 122,943.20                    | 100.00%                            | 11                        | 12                       | 17                      | 0.11%                       | 14.60%                       | RASPSKPASAPASR                  | K                   | S               | 95.00%                                  | 2.59                     | 0.233                  | 0                                | 0                                | 1                                | 0                                | 2                           | 1,462.72                           | 813                 | 826                | TRUE     |                |
| SNU216_Pc2_03     | Microtubule-associated protein 4 isoform 1 varia | IP000745518               | 122,943.20                    | 100.00%                            | 11                        | 12                       | 17                      | 0.11%                       | 14.60%                       | SPSTLLPK                        | R                   | K               | 95.00%                                  | 1.72                     | 0.253                  | 1                                | 0                                | 0                                | 0                                | 2                           | 922.4647                           | 853                 | 860                | TRUE     |                |
| SNU216_Pc2_03     | Microtubule-associated protein 4 isoform 1 varia | IP000745518               | 122,943.20                    | 100.00%                            | 11                        | 12                       | 17                      | 0.11%                       | 14.60%                       | VGSLDNVGHLPAGGAVK               | K                   | I               | 79.80%                                  | 2.46                     | 0.191                  | 0                                | 0                                | 1                                | 0                                | 2                           | 1,670.83                           | 1099                | 1115               | TRUE     |                |
| SNU216_Pc2_03     | DNA-repair protein complementing XP-G cells      | IP00477535                | 133,331.50                    | 99.80%                             | 2                         | 2                        | 2                       | 0.01%                       | 2.45%                        | LKTEKPEDATPPSPR                 | K                   | T               | 95.00%                                  | 2.57                     | 0.281                  | 0                                | 0                                | 1                                | 0                                | 2                           | 1,745.85                           | 329                 | 343                | TRUE     |                |
| SNU216_Pc2_03     | DNA-repair protein complementing XP-G cells      | IP00477535                | 133,331.50                    | 99.80%                             | 2                         | 2                        | 2                       | 0.01%                       | 2.45%                        | NAPAAVDEGSISR                   | R                   | T               | 95.00%                                  | 2.71                     | 0.415                  | 0                                | 1                                | 0                                | 0                                | 2                           | 1,463.65                           | 373                 | 386                | TRUE     |                |
| SNU216_Pc2_03     | 136 kDa protein                                  | IP00005625                | 135,683.90                    | 100.00%                            | 9                         | 13                       | 17                      | 0.11%                       | 6.19%                        | AISSSDOSSDEKKLK                 | K                   | I               | 86.00%                                  | 3.27                     | 0.0438                 | 0                                | 0                                | 0                                | 0                                | 2                           | 1,869.74                           | 1034                | 1049               | TRUE     |                |
| SNU216_Pc2_03     | 136 kDa protein                                  | IP00005625                | 135,683.90                    | 100.00%                            | 9                         | 13                       | 17                      | 0.11%                       | 6.19%                        | GEEGSDDDTENGPK                  | K                   | P               | 95.00%                                  | 2.59                     | 0.513                  | 0                                | 1                                | 0                                | 0                                | 2                           | 1,658.57                           | 988                 | 1002               | TRUE     |                |
| SNU216_Pc2_03     | 136 kDa protein                                  | IP00005625                | 135,683.90                    | 100.00%                            | 9                         | 13                       | 17                      | 0.11%                       | 6.19%                        | GEEGSDDDTENGPKPK                | K                   | K               | 95.00%                                  | 3.73                     | 0.427                  | 0                                | 1                                | 2                                | 0                                | 2                           | 1,883.72                           | 988                 | 1004               | TRUE     |                |
| SNU216_Pc2_03     | 136 kDa protein                                  | IP00005625                | 135,683.90                    | 100.00%                            | 9                         | 13                       | 17                      | 0.11%                       | 6.19%                        | GGGEDEFVNDTDDDLPSK              | K                   | K               | 95.00%                                  | 4.48                     | 0.471                  | 0                                | 1                                | 0                                | 0                                | 2                           | 2,307.92                           | 936                 | 955                | TRUE     |                |
| SNU216_Pc2_03     | 136 kDa protein                                  | IP00005625                | 135,683.90                    | 1                                  |                           |                          |                         |                             |                              |                                 |                     |                 |                                         |                          |                        |                                  |                                  |                                  |                                  |                             |                                    |                     |                    |          |                |

Supplemental Table 2. A list of all phosphorylated peptides identified in SNU216 and SNU216-LR.

| MS/MS sample name | Protein name                                            | Protein accession numbers  | Protein molecular weight (Da) | Protein identification probability | Number of unique peptides | Number of unique spectra | Number of total spectra | Percentage of total spectra | Percentage sequence coverage | Peptide sequence                 | Previous amino acid | Next amino acid | Best Peptide identification probability | Best SEQUEST XCorr score | Best SEQUEST DcN score | Number of identified +1H spectra | Number of identified +2H spectra | Number of identified +3H spectra | Number of identified +4H spectra | Number of enzymatic termini | Calculate d +1H Peptide Mass (AMU) | Peptide start index | Peptide stop index | Assigned | Other Proteins |
|-------------------|---------------------------------------------------------|----------------------------|-------------------------------|------------------------------------|---------------------------|--------------------------|-------------------------|-----------------------------|------------------------------|----------------------------------|---------------------|-----------------|-----------------------------------------|--------------------------|------------------------|----------------------------------|----------------------------------|----------------------------------|----------------------------------|-----------------------------|------------------------------------|---------------------|--------------------|----------|----------------|
| SNU216_PC2_03     | KIAA1228 protein                                        | IP00409635                 | 98,904.50                     | 100.00%                            | 4                         | 6                        | 6                       | 0.04%                       | 7.50%                        | SSSSLLASPGHISKEPTTASISDLSPIATQEL | R                   | Q               | 95.00%                                  | 6.03                     | 0.0455                 | 0                                | 0                                | 1                                | 0                                | 2                           | 3,748.84                           | 708                 | 742                | TRUE     |                |
| SNU216_PC2_03     | Isoform 1 of Protein phosphatase 1 regulatory subunit 1 | IP000183002;IP000397728,IP | 111,187.40                    | 100.00%                            | 2                         | 2                        | 2                       | 0.01%                       | 3.01%                        | DKKSPLUESTANMDNNQSQK             | R                   | T               | 95.00%                                  | 4.24                     | 0.437                  | 0                                | 0                                | 1                                | 0                                | 2                           | 2,328.05                           | 296                 | 315                | TRUE     |                |
| SNU216_PC2_03     | Isoform 1 of Protein phosphatase 1 regulatory subunit 1 | IP000183002;IP000397728,IP | 111,187.40                    | 100.00%                            | 2                         | 2                        | 2                       | 0.01%                       | 3.11%                        | FPTTATKISPK                      | K                   | E               | 94.40%                                  | 2.14                     | 0.199                  | 0                                | 1                                | 0                                | 0                                | 2                           | 1,270.64                           | 414                 | 424                | TRUE     |                |
| SNU216_PC2_03     | Isoform 1 of Double-strand break repair protein 1       | IP000291559;IP000218853    | 80,595.10                     | 100.00%                            | 1                         | 1                        | 1                       | 0.01%                       | 3.11%                        | GVDFESEDDEDDDDFMNTSSLR           | K                   | R               | 95.00%                                  | 4.16                     | 0.588                  | 0                                | 1                                | 0                                | 0                                | 2                           | 2,557.96                           | 683                 | 704                | TRUE     |                |
| SNU216_PC2_03     | Isoform 1 of NEDD9-interacting protein with calp        | IP000157757;IP000441963,IP | 117,875.60                    | 99.80%                             | 1                         | 1                        | 1                       | 0.01%                       | 2.34%                        | SMAHSPGVPQSASPGTSSAVLFLSK        | K                   | L               | 95.00%                                  | 4.3                      | 0.361                  | 0                                | 0                                | 1                                | 0                                | 2                           | 2,523.20                           | 613                 | 637                | TRUE     |                |
| SNU216_PC2_03     | Hypothetical protein KIAA0251                           | IP000384689                | 86,708.10                     | 100.00%                            | 3                         | 4                        | 4                       | 0.03%                       | 9.26%                        | GSDALSETSSVSHIEDLEK              | R                   | V               | 95.00%                                  | 4.32                     | 0.141                  | 0                                | 1                                | 1                                | 0                                | 2                           | 2,083.91                           | 713                 | 731                | TRUE     |                |
| SNU216_PC2_03     | Hypothetical protein KIAA0251                           | IP000384689                | 86,708.10                     | 100.00%                            | 3                         | 4                        | 4                       | 0.03%                       | 9.26%                        | GVPHPEDDHSVQEGPESLR              | K                   | -               | 95.00%                                  | 2.64                     | 0.302                  | 0                                | 0                                | 1                                | 0                                | 2                           | 2,164.93                           | 770                 | 788                | TRUE     |                |
| SNU216_PC2_03     | Hypothetical protein KIAA0251                           | IP000384689                | 86,708.10                     | 100.00%                            | 3                         | 4                        | 4                       | 0.03%                       | 9.26%                        | LSSGPEQITLEASSTEGHPGAPSPQHTDQTE  | R                   | G               | 95.00%                                  | 5.85                     | 0.217                  | 0                                | 0                                | 0                                | 1                                | 2                           | 3,742.69                           | 735                 | 769                | TRUE     |                |
| SNU216_PC2_03     | remodeling and spacing factor 1                         | IP000290652;IP000514411    | 159,318.30                    | 100.00%                            | 3                         | 3                        | 3                       | 0.02%                       | 3.89%                        | GRSTDYEYSEADDEEEEGKPSR           | R                   | K               | 95.00%                                  | 3.4                      | 0.48                   | 0                                | 0                                | 1                                | 0                                | 2                           | 2,897.99                           | 1234                | 1256               | TRUE     |                |
| SNU216_PC2_03     | remodeling and spacing factor 1                         | IP000290652;IP000514411    | 159,318.30                    | 100.00%                            | 3                         | 3                        | 3                       | 0.02%                       | 3.89%                        | KPDSPPKVLPEPK                    | K                   | Q               | 95.00%                                  | 3.17                     | 0.38                   | 0                                | 0                                | 1                                | 0                                | 2                           | 1,657.82                           | 704                 | 717                | TRUE     |                |
| SNU216_PC2_03     | remodeling and spacing factor 1                         | IP000290652;IP000514411    | 159,318.30                    | 100.00%                            | 3                         | 3                        | 3                       | 0.02%                       | 3.89%                        | TFLDKDAQRLSPPEVPK                | K                   | S               | 88.40%                                  | 3.12                     | 0.16                   | 0                                | 0                                | 1                                | 0                                | 2                           | 2,263.14                           | 553                 | 571                | TRUE     |                |
| SNU216_PC2_03     | Isoform A of A-kinase anchor protein 2                  | IP00032064;IP000171217,IP  | 122,072.40                    | 99.80%                             | 2                         | 2                        | 2                       | 0.01%                       | 4.08%                        | DALGDSLQVPVSPSTSSR               | R                   | C               | 95.00%                                  | 4.39                     | 0.0288                 | 0                                | 1                                | 0                                | 0                                | 2                           | 2,083.95                           | 372                 | 391                | TRUE     |                |
| SNU216_PC2_03     | Isoform A of A-kinase anchor protein 2                  | IP00032064;IP000171217,IP  | 122,072.40                    | 99.80%                             | 2                         | 2                        | 2                       | 0.01%                       | 4.08%                        | GQKSPGALETSPAAGSQGNTASQGK        | K                   | E               | 95.00%                                  | 4.1                      | 0.444                  | 0                                | 0                                | 1                                | 0                                | 2                           | 2,409.10                           | 621                 | 645                | TRUE     |                |
| SNU216_PC2_03     | FCH domain only 2                                       | IP00472794                 | 89,293.90                     | 98.90%                             | 1                         | 1                        | 1                       | 0.01%                       | 3.44%                        | GPSVPSLGNQDTLPVAVALTESVNAVK      | R                   | G               | 95.00%                                  | 5.76                     | 0.603                  | 0                                | 0                                | 1                                | 0                                | 2                           | 2,954.45                           | 535                 | 562                | TRUE     |                |
| SNU216_PC2_03     | poly(A) polymerase alpha                                | IP000384028                | 82,844.30                     | 99.80%                             | 1                         | 1                        | 1                       | 0.01%                       | 1.88%                        | HYGITSPLSLAAP                    | K                   | E               | 95.00%                                  | 3.96                     | 0.477                  | 0                                | 0                                | 1                                | 0                                | 2                           | 1,534.77                           | 19                  | 32                 | TRUE     |                |
| SNU216_PC2_03     | Novel protein                                           | IP000384541;IP000639879    | 152,879.40                    | 100.00%                            | 2                         | 2                        | 2                       | 0.01%                       | 2.46%                        | DVEDMELSDVEDGSK                  | R                   | I               | 95.00%                                  | 3.45                     | 0.460                  | 0                                | 1                                | 0                                | 0                                | 2                           | 1,862.69                           | 341                 | 356                | TRUE     |                |
| SNU216_PC2_03     | Novel protein                                           | IP000384541;IP000639879    | 152,879.40                    | 100.00%                            | 2                         | 2                        | 2                       | 0.01%                       | 2.46%                        | SNYNPSNSTSEVSSTSASK              | K                   | A               | 95.00%                                  | 4.35                     | 0.0861                 | 0                                | 1                                | 0                                | 0                                | 2                           | 2,146.88                           | 563                 | 582                | TRUE     |                |
| SNU216_PC2_03     | Isoform 1 of Protein FAM40A                             | IP000549766                | 95,579.00                     | 100.00%                            | 2                         | 2                        | 2                       | 0.01%                       | 2.15%                        | AASPPASASDLIEQQK                 | R                   | R               | 95.00%                                  | 3.15                     | 0.424                  | 0                                | 0                                | 1                                | 0                                | 2                           | 1,820.84                           | 333                 | 349                | TRUE     |                |
| SNU216_PC2_03     | Isoform 1 of Protein FAM40A                             | IP000549766                | 95,579.00                     | 100.00%                            | 2                         | 2                        | 2                       | 0.01%                       | 2.15%                        | AASPPASASDLIEQQQR                | R                   | G               | 95.00%                                  | 4.33                     | 0.474                  | 0                                | 0                                | 1                                | 0                                | 2                           | 1,976.94                           | 333                 | 350                | TRUE     |                |
| SNU216_PC2_03     | KH-type splicing regulatory protein                     | IP000479786;IP000759502    | 73,805.40                     | 100.00%                            | 1                         | 1                        | 1                       | 0.01%                       | 1.83%                        | QIQLSPDGGGLFR                    | K                   | S               | 95.00%                                  | 2.21                     | 0.255                  | 0                                | 1                                | 0                                | 0                                | 2                           | 1,434.66                           | 178                 | 190                | TRUE     |                |
| SNU216_PC2_03     | Isoform Beta-1 of DNA topoisomerase 2-beta              | IP000027280;IP000217709    | 183,273.10                    | 99.80%                             | 2                         | 2                        | 2                       | 0.01%                       | 3.21%                        | KTSFDQSDVDVDFDPTFPEPSLR          | K                   | T               | 95.00%                                  | 4.7                      | 0.437                  | 0                                | 0                                | 1                                | 0                                | 2                           | 3,017.35                           | 1574                | 1599               | TRUE     |                |
| SNU216_PC2_03     | Isoform Beta-1 of DNA topoisomerase 2-beta              | IP000027280;IP000217709    | 183,273.10                    | 99.80%                             | 2                         | 2                        | 2                       | 0.01%                       | 3.21%                        | SESDSAKFDSNEEDSASVSPFSGLK        | K                   | Q               | 95.00%                                  | 3.42                     | 0.347                  | 0                                | 0                                | 1                                | 0                                | 2                           | 2,875.18                           | 1457                | 1482               | TRUE     |                |
| SNU216_PC2_03     | Hypothetical protein DKFZ686A0439                       | IP000448751                | 73,610.10                     | 99.80%                             | 1                         | 1                        | 1                       | 0.01%                       | 2.00%                        | SMPVLGVSSVYTK                    | K                   | T               | 95.00%                                  | 2.14                     | 0.281                  | 0                                | 1                                | 0                                | 0                                | 2                           | 1,371.66                           | 506                 | 518                | TRUE     |                |
| SNU216_PC2_03     | Isoform D of Plasma membrane calcium-transpor           | IP000021695;IP000216527,IP | 138,759.20                    | 99.90%                             | 2                         | 2                        | 2                       | 0.01%                       | 1.91%                        | IEDSEPHILDDTDDAEDDAPTK           | R                   | R               | 95.00%                                  | 4.1                      | 0.24                   | 0                                | 0                                | 1                                | 0                                | 2                           | 2,616.12                           | 1190                | 1212               | TRUE     |                |
| SNU216_PC2_03     | Isoform D of Plasma membrane calcium-transpor           | IP000021695;IP000216527,IP | 138,759.20                    | 99.90%                             | 2                         | 2                        | 2                       | 0.01%                       | 1.91%                        | IEDSEPHILDDTDDAEDDAPTKR          | R                   | N               | 95.00%                                  | 4.8                      | 0.396                  | 0                                | 0                                | 1                                | 0                                | 2                           | 2,772.23                           | 1190                | 1213               | TRUE     |                |
| SNU216_PC2_03     | CDNA FLJ14717 fls, clone NT2RP3001239, moder            | IP00045856;IP000296485     | 95,254.60                     | 100.00%                            | 2                         | 3                        | 3                       | 0.02%                       | 4.87%                        | AVPMAPAPASGSSNDSAR               | K                   | S               | 95.00%                                  | 3.32                     | 0.31                   | 0                                | 0                                | 1                                | 0                                | 2                           | 1,949.84                           | 750                 | 769                | TRUE     |                |
| SNU216_PC2_03     | CDNA FLJ14717 fls, clone NT2RP3001239, moder            | IP00045856;IP000296485     | 95,254.60                     | 100.00%                            | 2                         | 3                        | 3                       | 0.02%                       | 4.87%                        | KAPSTSHSGFFPVAANGRSPPSLR         | R                   | C               | 95.00%                                  | 3.21                     | 0.222                  | 0                                | 0                                | 1                                | 0                                | 2                           | 2,524.25                           | 564                 | 587                | TRUE     |                |
| SNU216_PC2_03     | Isoform 5 of C-jun-amino-terminal kinase-interac        | IP000744288                | 103,212.60                    | 100.00%                            | 3                         | 3                        | 3                       | 0.03%                       | 4.62%                        | ERTPSLGIPLPAGDGLLTQDAQK          | K                   | G               | 95.00%                                  | 4.36                     | 0.504                  | 0                                | 0                                | 1                                | 0                                | 2                           | 2,585.34                           | 199                 | 222                | TRUE     |                |
| SNU216_PC2_03     | Isoform 5 of C-jun-amino-terminal kinase-interac        | IP000744288                | 103,212.60                    | 100.00%                            | 3                         | 3                        | 3                       | 0.03%                       | 4.62%                        | SASQSSLDLKLQDELK                 | R                   | E               | 95.00%                                  | 2.45                     | 0.198                  | 0                                | 1                                | 0                                | 0                                | 2                           | 1,728.81                           | 714                 | 728                | TRUE     |                |
| SNU216_PC2_03     | Isoform 5 of C-jun-amino-terminal kinase-interac        | IP000744288                | 103,212.60                    | 100.00%                            | 3                         | 3                        | 3                       | 0.03%                       | 4.62%                        | SASQSSLDLKLQDELKEQQK             | R                   | E               | 95.00%                                  | 4.21                     | 0.339                  | 0                                | 0                                | 2                                | 0                                | 2                           | 2,242.06                           | 714                 | 732                | TRUE     |                |
| SNU216_PC2_03     | Isoform 1 of Tumor suppressor p53-binding prot          | IP000297778;IP000742743    | 213,572.20                    | 100.00%                            | 9                         | 10                       | 11                      | 0.07%                       | 8.57%                        | GNLLHFPSQGEKEKLEGDHTIR           | R                   | Q               | 95.00%                                  | 3.51                     | 0.232                  | 0                                | 0                                | 1                                | 0                                | 2                           | 2,930.37                           | 1060                | 1084               | TRUE     |                |
| SNU216_PC2_03     | Isoform 1 of Tumor suppressor p53-binding prot          | IP000297778;IP000742743    | 213,572.20                    | 100.00%                            | 9                         | 10                       | 11                      | 0.07%                       | 8.57%                        | IEDGENTQIEDTEPMPSVLNKK           | R                   | F               | 95.00%                                  | 5.36                     | 0.477                  | 0                                | 0                                | 1                                | 0                                | 2                           | 2,641.12                           | 536                 | 558                | TRUE     |                |
| SNU216_PC2_03     | Isoform 1 of Tumor suppressor p53-binding prot          | IP000297778;IP000742743    | 213,572.20                    | 100.00%                            | 9                         | 10                       | 11                      | 0.07%                       | 8.57%                        | KNGSTAVAESVASPOK                 | R                   | T               | 95.00%                                  | 2.82                     | 0.273                  | 0                                | 1                                | 0                                | 0                                | 2                           | 1,653.78                           | 1016                | 1031               | TRUE     |                |
| SNU216_PC2_03     | Isoform 1 of Tumor suppressor p53-binding prot          | IP000297778;IP000742743    | 213,572.20                    | 100.00%                            | 9                         | 10                       | 11                      | 0.07%                       | 8.57%                        | MVIQGPSPPQGEAMVTDVLEDQKEGR       | K                   | S               | 95.00%                                  | 7.09                     | 0.632                  | 0                                | 0                                | 1                                | 0                                | 2                           | 2,881.31                           | 1107                | 1132               | TRUE     |                |
| SNU216_PC2_03     | Isoform 1 of Tumor suppressor p53-binding prot          | IP000297778;IP000742743    | 213,572.20                    | 100.00%                            | 9                         | 10                       | 11                      | 0.07%                       | 8.57%                        | GSQQMKPSPVQKRVSPASQK             | R                   | M               | 95.00%                                  | 4.11                     | 0.426                  | 0                                | 0                                | 2                                | 0                                | 2                           | 2,457.22                           | 1085                | 1106               | TRUE     |                |
| SNU216_PC2_03     | Isoform 1 of Tumor suppressor p53-binding prot          | IP000297778;IP000742743    | 213,572.20                    | 100.00%                            | 9                         | 10                       | 11                      | 0.07%                       | 8.57%                        | RDSPEIPFGAAGSPDGLDASSPGNSFVGI    | R                   | V               | 95.00%                                  | 6.56                     | 0.533                  | 0                                | 0                                | 1                                | 0                                | 2                           | 3,282.51                           | 1459                | 1490               | TRUE     |                |
| SNU216_PC2_03     | Isoform 1 of Tumor suppressor p53-binding prot          | IP000297778;IP000742743    | 213,572.20                    | 100.00%                            | 9                         | 10                       | 11                      | 0.07%                       | 8.57%                        | SDSPEIPFGAAGSPDGLDASSPGNSFVGLI   | R                   | V               | 95.00%                                  | 5.21                     | 0.486                  | 0                                | 0                                | 1                                | 0                                | 2                           | 3,126.41                           | 1460                | 1490               | TRUE     |                |
| SNU216_PC2_03     | Isoform 1 of Tumor suppressor p53-binding prot          | IP000297778;IP000742743    | 213,572.20                    | 100.00%                            | 9                         | 10                       | 11                      | 0.07%                       | 8.57%                        | SEDMPFSPK                        | R                   | A               | 95.00%                                  | 1.92                     | 0.306                  | 0                                | 1                                | 0                                | 0                                | 2                           | 1,117.43                           | 259                 | 267                | TRUE     |                |
| SNU216_PC2_03     | Isoform 1 of Tumor suppressor p53-binding prot          | IP000297778;IP000742743    | 213,572.20                    | 100.00%                            | 9                         | 10                       | 11                      | 0.07%                       | 8.57%                        | STPIRVPSSTPEQGR                  | R                   | Q               | 95.00%                                  | 2.56                     | 0.237                  | 0                                | 1                                | 0                                | 0                                | 2                           | 1,811.82                           | 372                 | 387                | TRUE     |                |
| SNU216_PC2_03     | nuclear receptor co-repressor 2                         | IP000001735                | 274,735.30                    | 99.80%                             | 2                         | 2                        | 2                       | 0.01%                       | 1.66%                        | EKTDDTSGEDNDEKAVASK              | K                   | G               | 95.00%                                  | 2.58                     | 0.283                  | 0                                | 0                                | 1                                | 0                                | 2                           | 2,327.88                           | 548                 | 567                | TRUE     |                |
| SNU216_PC2_03     | nuclear receptor co-repressor 2                         | IP000001735                | 274,735.30                    | 99.80%                             | 2                         | 2                        | 2                       | 0.01%                       | 1.66%                        | LEPVSPSPPTDPELVLVPPR             | K                   | L               | 95.00%                                  | 3.22                     | 0.375                  | 0                                | 0                                | 1                                | 0                                | 2                           | 2,563.19                           | 145                 | 166                | TRUE     |                |
| SNU216_PC2_03     | Isoform 1 of W51-like protein                           | IP000296432                | 91,956.10                     | 100.00%                            | 20                        | 29                       | 41                      | 0.27%                       | 23.10%                       | AAVLSDSDEEKASAK                  | K                   | K               | 95.00%                                  | 2.88                     | 0.416                  | 0                                | 1                                | 1                                | 0                                | 2                           | 1,809.72                           | 394                 | 409                | TRUE     |                |
| SNU216_PC2_03     | Isoform 1 of W51-like protein                           | IP000296432                | 91,956.10                     | 100.00%                            | 20                        | 29                       | 41                      | 0.27%                       | 23.10%                       | EAEDSDSDNKK                      | K                   | R               | 94.30%                                  | 1.83                     | 0.261                  | 0                                | 1                                | 0                                | 0                                | 2                           | 1,497.47                           | 507                 | 518                | TRUE     |                |
| SNU216_PC2_03     | Isoform 1 of W51-like protein                           | IP000296432                | 91,956.10                     | 100.00%                            | 20                        | 29                       | 41                      | 0.27%                       | 23.10%                       | EAEDSDSDNKKR                     | K                   | G               | 95.00%                                  | 2.53                     | 0.332                  | 0                                | 2                                | 0                                | 0                                | 2                           | 1,653.57                           | 507                 | 519                | TRUE     |                |
| SNU216_PC2_03     | Isoform 1 of W51-like protein                           | IP000296432                | 91,956.10                     | 100.00%                            | 20                        | 29                       | 41                      | 0.27%                       | 23.10%                       | EKTIASDSDEEAGK                   | R                   | E               | 95.00%                                  | 2.74                     | 0.407                  | 0                                | 1                                | 0                                | 0                                | 2                           | 1,653.63                           | 433                 | 446                | TRUE     |                |
| SNU216_PC2_03     | Isoform 1 of W51-like protein                           | IP000296432                | 91,956.10                     | 100.00%                            | 20                        | 29                       | 41                      | 0.27%                       | 23.10%                       | EKTIASDSDEEAGKELSDK              | R                   | K               | 95.00%                                  | 2.99                     | 0.523                  | 0                                | 1                                | 0                                | 0                                | 2                           | 2,225.91                           | 433                 | 451                | TRUE     |                |
| SNU216_PC2_03     | Isoform 1 of W51-like protein                           | IP000296432                | 91,956.10                     | 100.00%                            | 20                        | 29                       | 41                      | 0.27%                       | 23.10%                       | FHSSDSDEEHHKK                    | K                   | Q               | 95.00%                                  | 1.72                     | 0.387                  | 0                                | 1                                | 0                                | 0                                | 2                           | 1,828.59                           | 360                 | 372                | TRUE     |                |
| SNU216_PC2_03     | Isoform 1 of W51-like protein                           | IP000296432                | 91,956.10                     | 100.00%                            | 20                        | 29                       | 41                      | 0.27%                       | 23.10%                       | GHHVTDSENDPEPLNNAEDSESEELHR      | K                   | Q               | 95.00%                                  | 3.98                     | 0.202                  | 0                                | 0                                | 1                                | 2                                | 2                           | 3,271.23                           | 63                  | 89                 | TRUE     |                |
| SNU216_PC2_03     | Isoform 1 of W51-like protein                           | IP000296432                | 91,956.10                     | 100.00%                            | 20                        | 29                       | 41                      | 0.27%                       | 23.10%                       | GPASDSETEADSR                    | K                   | H               | 95.00%                                  | 2.35                     | 0.484                  | 0                                | 3                                | 0                                | 0                                | 2                           | 1,401.52                           | 310                 | 322                | TRUE     |                |
| SNU216_PC2_03     | Isoform 1 of W51-like protein                           | IP000296432                | 91,956.10                     | 100.00%                            | 20                        | 29                       | 41                      | 0.27%                       | 23.10%                       | HQASDSENEELPKPR                  | R                   | I               | 95.00%                                  | 3.65                     | 0.312                  | 0                                | 1                                | 2                                | 0                                | 2                           |                                    |                     |                    |          |                |

Supplemental Table 2. A list of all phosphorylated peptides identified in SNU216 and SNU216-LR.

| MS/MS sample name | Protein name                                          | Protein accession numbers  | Protein molecular weight (Da) | Protein identification probability | Number of unique peptides | Number of unique spectra | Number of total spectra | Percentage of total spectra | Percentage sequence coverage | Peptide sequence               | Previous amino acid | Next amino acid | Best Peptide identification probability | Best SEQUEST XCorr score | Best SEQUEST Dcn score | Number of identified +1H spectra | Number of identified +2H spectra | Number of identified +3H spectra | Number of identified +4H spectra | Number of enzymatic termini | Calculate d +1H Peptide Mass (AMU) | Peptide start index | Peptide stop index | Assigned | Other Proteins |
|-------------------|-------------------------------------------------------|----------------------------|-------------------------------|------------------------------------|---------------------------|--------------------------|-------------------------|-----------------------------|------------------------------|--------------------------------|---------------------|-----------------|-----------------------------------------|--------------------------|------------------------|----------------------------------|----------------------------------|----------------------------------|----------------------------------|-----------------------------|------------------------------------|---------------------|--------------------|----------|----------------|
| SNU216_PC2_03     | hepatoma-derived growth factor-related protein 1      | IP000419322;IP000645387    | 74,730.70                     | 100.00%                            | 8                         | 10                       | 11                      | 0.07%                       | 14.50%                       | GSQGSSGDELREDDEPVKK            | R                   | R               | 95.00%                                  | 2.5                      | 0.235                  | 0                                | 0                                | 1                                | 0                                | 2                           | 2,121.84                           | 365                 | 383                | TRUE     |                |
| SNU216_PC2_03     | hepatoma-derived growth factor-related protein 1      | IP000419322;IP000645387    | 74,730.70                     | 100.00%                            | 8                         | 10                       | 11                      | 0.07%                       | 14.50%                       | GVNAVATYATATAASDR              | R                   | M               | 95.00%                                  | 2.26                     | 0.292                  | 0                                | 1                                | 0                                | 0                                | 2                           | 1,600.74                           | 124                 | 139                | TRUE     |                |
| SNU216_PC2_03     | hepatoma-derived growth factor-related protein 1      | IP000419322;IP000645387    | 74,730.70                     | 100.00%                            | 8                         | 10                       | 11                      | 0.07%                       | 14.50%                       | KRSEGFMSDR                     | R                   | K               | 95.00%                                  | 2.44                     | 0.405                  | 0                                | 1                                | 1                                | 0                                | 2                           | 1,292.55                           | 452                 | 461                | TRUE     |                |
| SNU216_PC2_03     | Epidermal growth factor receptor kinase substrate     | IP000290337                | 92,041.00                     | 100.00%                            | 2                         | 2                        | 2                       | 0.01%                       | 3.52%                        | QNSSSSDSGGSSIVR                | R                   | D               | 95.00%                                  | 3.4                      | 0.507                  | 0                                | 1                                | 0                                | 0                                | 2                           | 1,460.60                           | 659                 | 672                | TRUE     |                |
| SNU216_PC2_03     | Epidermal growth factor receptor kinase substrate     | IP000290337                | 92,041.00                     | 100.00%                            | 2                         | 2                        | 2                       | 0.01%                       | 3.52%                        | RKSGMEEVQDELHVR                | R                   | L               | 95.00%                                  | 2.97                     | 0.269                  | 0                                | 0                                | 0                                | 1                                | 2                           | 1,977.92                           | 685                 | 699                | TRUE     |                |
| SNU216_PC2_03     | WD repeat domain 44 protein                           | IP000444371;IP000552345;IP | 101,587.90                    | 100.00%                            | 4                         | 5                        | 5                       | 0.03%                       | 6.46%                        | EYVSNDAQSDDEEKLQSQPTDTDGGR     | K                   | L               | 95.00%                                  | 3.34                     | 0.291                  | 0                                | 0                                | 1                                | 0                                | 2                           | 3,035.24                           | 396                 | 422                | TRUE     |                |
| SNU216_PC2_03     | WD repeat domain 44 protein                           | IP000444371;IP000552345;IP | 101,587.90                    | 100.00%                            | 4                         | 5                        | 5                       | 0.03%                       | 6.46%                        | SNSGRELTDDEILASVMIK            | R                   | N               | 95.00%                                  | 4.68                     | 0.326                  | 0                                | 0                                | 1                                | 0                                | 2                           | 2,172.03                           | 344                 | 362                | TRUE     |                |
| SNU216_PC2_03     | WD repeat domain 44 protein                           | IP000444371;IP000552345;IP | 101,587.90                    | 100.00%                            | 4                         | 5                        | 5                       | 0.03%                       | 6.46%                        | TKEYVSNDAQAQSDDEEKLQSQPTDTDGGR | R                   | L               | 95.00%                                  | 5.55                     | 0.504                  | 0                                | 0                                | 1                                | 1                                | 2                           | 3,264.38                           | 394                 | 422                | TRUE     |                |
| SNU216_PC2_03     | WD repeat domain 44 protein                           | IP000444371;IP000552345;IP | 101,587.90                    | 100.00%                            | 4                         | 5                        | 5                       | 0.03%                       | 6.46%                        | VGNESPVQLK                     | K                   | Q               | 79.60%                                  | 2.09                     | 0.15                   | 0                                | 1                                | 0                                | 0                                | 2                           | 1,279.59                           | 46                  | 56                 | TRUE     |                |
| SNU216_PC2_03     | Isoform 1 of Ephrin type-B receptor 2 precursor       | IP00021275;IP000219421;IP  | 117,494.20                    | 99.80%                             | 2                         | 3                        | 3                       | 0.02%                       | 3.79%                        | ADSEYTDKLQHYTSGHMTPGMK         | R                   | I               | 95.00%                                  | 4.07                     | 0.325                  | 0                                | 0                                | 1                                | 1                                | 2                           | 2,577.08                           | 573                 | 594                | TRUE     |                |
| SNU216_PC2_03     | Isoform 1 of Ephrin type-B receptor 2 precursor       | IP00021275;IP000219421;IP  | 117,494.20                    | 99.80%                             | 2                         | 3                        | 3                       | 0.02%                       | 3.79%                        | FLEDDTSDPTYTSALGGK             | R                   | I               | 95.00%                                  | 3.37                     | 0.404                  | 0                                | 1                                | 0                                | 0                                | 2                           | 1,996.84                           | 770                 | 787                | TRUE     |                |
| SNU216_PC2_03     | MORC family CW-type zinc finger 2                     | IP000455518                | 110,726.90                    | 99.90%                             | 2                         | 2                        | 2                       | 0.01%                       | 3.20%                        | KTESPKLSPATPSR                 | K                   | K               | 95.00%                                  | 3.72                     | 0.279                  | 0                                | 0                                | 1                                | 0                                | 2                           | 1,691.87                           | 660                 | 674                | TRUE     |                |
| SNU216_PC2_03     | MORC family CW-type zinc finger 2                     | IP000455518                | 110,726.90                    | 99.90%                             | 2                         | 2                        | 2                       | 0.01%                       | 3.20%                        | SVAVSDEEEVEEAER                | R                   | R               | 95.00%                                  | 3.6                      | 0.391                  | 0                                | 1                                | 0                                | 0                                | 2                           | 1,886.75                           | 677                 | 692                | TRUE     |                |
| SNU216_PC2_03     | hypothetical protein LOC64423 isoform 2               | IP000644591                | 78,770.80                     | 100.00%                            | 4                         | 5                        | 6                       | 0.04%                       | 12.40%                       | DPTSLGLVQAEADTSEGLEDVAHSR      | K                   | G               | 95.00%                                  | 6.2                      | 0.435                  | 0                                | 0                                | 1                                | 0                                | 2                           | 2,877.32                           | 600                 | 626                | TRUE     |                |
| SNU216_PC2_03     | hypothetical protein LOC64423 isoform 2               | IP000644591                | 78,770.80                     | 100.00%                            | 4                         | 5                        | 6                       | 0.04%                       | 12.40%                       | EHNSMWAISLSPDAEAVPEPDSIER      | R                   | L               | 95.00%                                  | 4.79                     | 0.477                  | 0                                | 0                                | 0                                | 0                                | 2                           | 2,971.25                           | 46                  | 71                 | TRUE     |                |
| SNU216_PC2_03     | hypothetical protein LOC64423 isoform 2               | IP000644591                | 78,770.80                     | 100.00%                            | 4                         | 5                        | 6                       | 0.04%                       | 12.40%                       | GARPPAAGPGGDEDEEDTAPESALDTSL   | R                   | S               | 95.00%                                  | 6.99                     | 0.548                  | 0                                | 0                                | 2                                | 0                                | 2                           | 3,292.37                           | 627                 | 658                | TRUE     |                |
| SNU216_PC2_03     | hypothetical protein LOC64423 isoform 2               | IP000644591                | 78,770.80                     | 100.00%                            | 4                         | 5                        | 6                       | 0.04%                       | 12.40%                       | QDAKDPTSLGLVLQAEADTSEGLEDVAHS  | R                   | G               | 95.00%                                  | 6.77                     | 0.51                   | 0                                | 0                                | 1                                | 1                                | 2                           | 3,319.53                           | 596                 | 626                | TRUE     |                |
| SNU216_PC2_03     | 182 kDa tankyrase 1-binding protein                   | IP000304589                | 181,815.00                    | 100.00%                            | 9                         | 11                       | 11                      | 0.07%                       | 8.85%                        | GSGLGFSPSTAHVPDGLGQR           | R                   | D               | 95.00%                                  | 2.69                     | 0.226                  | 0                                | 0                                | 0                                | 1                                | 2                           | 2,090.97                           | 1023                | 1043               | TRUE     |                |
| SNU216_PC2_03     | 182 kDa tankyrase 1-binding protein                   | IP000304589                | 181,815.00                    | 100.00%                            | 9                         | 11                       | 11                      | 0.07%                       | 8.85%                        | NRSAEEGEALSK                   | R                   | S               | 95.00%                                  | 3.22                     | 0.361                  | 0                                | 1                                | 1                                | 0                                | 2                           | 1,499.64                           | 1664                | 1676               | TRUE     |                |
| SNU216_PC2_03     | 182 kDa tankyrase 1-binding protein                   | IP000304589                | 181,815.00                    | 100.00%                            | 9                         | 11                       | 11                      | 0.07%                       | 8.85%                        | RDSLGAAYSQDANEQGQDLGK          | K                   | R               | 95.00%                                  | 3.81                     | 0.404                  | 0                                | 0                                | 1                                | 0                                | 2                           | 2,302.99                           | 891                 | 911                | TRUE     |                |
| SNU216_PC2_03     | 182 kDa tankyrase 1-binding protein                   | IP000304589                | 181,815.00                    | 100.00%                            | 9                         | 11                       | 11                      | 0.07%                       | 8.85%                        | RDSLGAAYSQDANEQGQDLGK          | K                   | D               | 95.00%                                  | 7.26                     | 0.392                  | 0                                | 0                                | 0                                | 0                                | 2                           | 2,459.10                           | 891                 | 912                | TRUE     |                |
| SNU216_PC2_03     | 182 kDa tankyrase 1-binding protein                   | IP000304589                | 181,815.00                    | 100.00%                            | 9                         | 11                       | 11                      | 0.07%                       | 8.85%                        | RESAASGLGLLEEAGAGAAQEEVLEPGI   | R                   | D               | 95.00%                                  | 6.52                     | 0.568                  | 0                                | 0                                | 1                                | 0                                | 2                           | 3,090.44                           | 1471                | 1501               | TRUE     |                |
| SNU216_PC2_03     | 182 kDa tankyrase 1-binding protein                   | IP000304589                | 181,815.00                    | 100.00%                            | 9                         | 11                       | 11                      | 0.07%                       | 8.85%                        | SPSQQSFRETDILDSAMYR            | R                   | S               | 95.00%                                  | 5.55                     | 0.564                  | 0                                | 0                                | 1                                | 1                                | 2                           | 2,531.07                           | 1552                | 1572               | TRUE     |                |
| SNU216_PC2_03     | 182 kDa tankyrase 1-binding protein                   | IP000304589                | 181,815.00                    | 100.00%                            | 9                         | 11                       | 11                      | 0.07%                       | 8.85%                        | VPSSDEEVVEEPQSR                | R                   | R               | 95.00%                                  | 4.12                     | 0.396                  | 0                                | 0                                | 0                                | 0                                | 2                           | 1,846.71                           | 1618                | 1632               | TRUE     |                |
| SNU216_PC2_03     | 182 kDa tankyrase 1-binding protein                   | IP000304589                | 181,815.00                    | 100.00%                            | 9                         | 11                       | 11                      | 0.07%                       | 8.85%                        | VSGAGFSPSSK                    | R                   | M               | 90.90%                                  | 2                        | 0.25                   | 0                                | 0                                | 1                                | 0                                | 2                           | 1,103.48                           | 1132                | 1142               | TRUE     |                |
| SNU216_PC2_03     | 182 kDa tankyrase 1-binding protein                   | IP000304589                | 181,815.00                    | 100.00%                            | 9                         | 11                       | 11                      | 0.07%                       | 8.85%                        | YESQEPLAGQESSPLPLATR           | R                   | E               | 95.00%                                  | 3.52                     | 0.362                  | 0                                | 0                                | 0                                | 0                                | 2                           | 2,166.01                           | 590                 | 608                | TRUE     |                |
| SNU216_PC2_03     | Rala-binding protein 1                                | IP00009544                 | 75,934.00                     | 100.00%                            | 6                         | 6                        | 6                       | 0.04%                       | 11.90%                       | AKGEPAKPSPSR                   | K                   | D               | 95.00%                                  | 3.28                     | 0.403                  | 0                                | 0                                | 1                                | 0                                | 2                           | 1,304.64                           | 636                 | 647                | TRUE     |                |
| SNU216_PC2_03     | Rala-binding protein 1                                | IP00009544                 | 75,934.00                     | 100.00%                            | 6                         | 6                        | 6                       | 0.04%                       | 11.90%                       | RTEGYAAQFQDSSGDEAEPSK          | K                   | M               | 95.00%                                  | 3.1                      | 0.32                   | 0                                | 0                                | 1                                | 0                                | 2                           | 2,520.94                           | 80                  | 101                | TRUE     |                |
| SNU216_PC2_03     | Rala-binding protein 1                                | IP00009544                 | 75,934.00                     | 100.00%                            | 6                         | 6                        | 6                       | 0.04%                       | 11.90%                       | TEGYAAQFQDSSGDEAEPSK           | R                   | M               | 95.00%                                  | 3.2                      | 0.303                  | 0                                | 1                                | 0                                | 0                                | 2                           | 2,364.84                           | 81                  | 101                | TRUE     |                |
| SNU216_PC2_03     | Rala-binding protein 1                                | IP00009544                 | 75,934.00                     | 100.00%                            | 6                         | 6                        | 6                       | 0.04%                       | 11.90%                       | TEGPPPHDILHEPPDVVSDEKDHGK      | R                   | K               | 95.00%                                  | 4.54                     | 0.375                  | 0                                | 0                                | 0                                | 1                                | 2                           | 3,107.30                           | 43                  | 69                 | TRUE     |                |
| SNU216_PC2_03     | Rala-binding protein 1                                | IP00009544                 | 75,934.00                     | 100.00%                            | 6                         | 6                        | 6                       | 0.04%                       | 11.90%                       | TPSSEISPTK                     | R                   | F               | 95.00%                                  | 2.46                     | 0.419                  | 0                                | 1                                | 0                                | 0                                | 2                           | 1,255.55                           | 26                  | 36                 | TRUE     |                |
| SNU216_PC2_03     | Rala-binding protein 1                                | IP00009544                 | 75,934.00                     | 100.00%                            | 6                         | 6                        | 6                       | 0.04%                       | 11.90%                       | TPSSEISPTKFPGLYR               | R                   | T               | 95.00%                                  | 3.38                     | 0.434                  | 0                                | 0                                | 0                                | 0                                | 2                           | 1,988.94                           | 26                  | 42                 | TRUE     |                |
| SNU216_PC2_03     | CD44 antigen isoform 4 precursor                      | IP000297160;IP000305064;IP | 53,410.80                     | 100.00%                            | 1                         | 2                        | 4                       | 0.03%                       | 5.82%                        | KPSGLNGEASKSQEMVHLVNK          | R                   | E               | 95.00%                                  | 5.86                     | 0.5                    | 0                                | 0                                | 1                                | 3                                | 2                           | 2,333.13                           | 446                 | 466                | TRUE     |                |
| SNU216_PC2_03     | Isoform 1 of Zinc finger CCH-type domain-cont.        | IP000329547                | 196,639.60                    | 99.80%                             | 2                         | 2                        | 2                       | 0.01%                       | 1.86%                        | HHSSSSQDSSGHSFSPSR             | R                   | R               | 95.00%                                  | 2.58                     | 0.22                   | 0                                | 0                                | 0                                | 0                                | 2                           | 2,305.95                           | 331                 | 350                | TRUE     |                |
| SNU216_PC2_03     | Isoform 1 of Zinc finger CCH-type domain-cont.        | IP000329547                | 196,639.60                    | 99.80%                             | 2                         | 2                        | 2                       | 0.01%                       | 1.86%                        | SLSPSHLTDR                     | R                   | Q               | 95.00%                                  | 2.05                     | 0.319                  | 0                                | 0                                | 1                                | 0                                | 2                           | 1,321.58                           | 875                 | 885                | TRUE     |                |
| SNU216_PC2_03     | oxysterol-binding protein-like protein 5 isoform b    | IP000154388;IP000220116    | 91,900.50                     | 99.90%                             | 3                         | 3                        | 3                       | 0.02%                       | 3.53%                        | ENPEESDTETQDHSR                | R                   | K               | 93.50%                                  | 2.5                      | 0.219                  | 0                                | 0                                | 1                                | 0                                | 2                           | 1,853.68                           | 239                 | 253                | TRUE     |                |
| SNU216_PC2_03     | oxysterol-binding protein-like protein 5 isoform b    | IP000154388;IP000220116    | 91,900.50                     | 99.90%                             | 3                         | 3                        | 3                       | 0.02%                       | 3.53%                        | QTFLLGSPGPR                    | R                   | H               | 82.80%                                  | 1.85                     | 0.245                  | 0                                | 1                                | 0                                | 0                                | 2                           | 1,240.57                           | 683                 | 693                | TRUE     |                |
| SNU216_PC2_03     | oxysterol-binding protein-like protein 5 isoform b    | IP000154388;IP000220116    | 91,900.50                     | 99.90%                             | 3                         | 3                        | 3                       | 0.02%                       | 3.53%                        | SERENPEESDTETQDHSR             | K                   | K               | 95.00%                                  | 3.01                     | 0.193                  | 0                                | 0                                | 1                                | 0                                | 2                           | 2,225.86                           | 236                 | 253                | TRUE     |                |
| SNU216_PC2_03     | Isoform 1 of Pinin                                    | IP000418458                | 81,613.20                     | 100.00%                            | 9                         | 13                       | 18                      | 0.12%                       | 13.10%                       | EIAIVHSDAEK                    | K                   | E               | 95.00%                                  | 2.72                     | 0.366                  | 0                                | 1                                | 0                                | 0                                | 2                           | 1,291.59                           | 341                 | 351                | TRUE     |                |
| SNU216_PC2_03     | Isoform 1 of Pinin                                    | IP000418458                | 81,613.20                     | 100.00%                            | 9                         | 13                       | 18                      | 0.12%                       | 13.10%                       | EIAIVHSDAEKEQEKEEQK            | K                   | Q               | 95.00%                                  | 3.53                     | 0.345                  | 0                                | 0                                | 1                                | 0                                | 2                           | 2,321.02                           | 341                 | 359                | TRUE     |                |
| SNU216_PC2_03     | Isoform 1 of Pinin                                    | IP000418458                | 81,613.20                     | 100.00%                            | 9                         | 13                       | 18                      | 0.12%                       | 13.10%                       | EIAIVHSDAEKEQEKEEQKQEMEVK      | K                   | M               | 95.00%                                  | 6.85                     | 0.564                  | 0                                | 0                                | 1                                | 2                                | 3,065.37                    | 341                                | 365                 | TRUE               |          |                |
| SNU216_PC2_03     | Isoform 1 of Pinin                                    | IP000418458                | 81,613.20                     | 100.00%                            | 9                         | 13                       | 18                      | 0.12%                       | 13.10%                       | ESEKQDQSQPEEVMDVLMVENVK        | R                   | H               | 95.00%                                  | 4.8                      | 0.493                  | 0                                | 0                                | 1                                | 0                                | 2                           | 2,900.26                           | 374                 | 397                | TRUE     |                |
| SNU216_PC2_03     | Isoform 1 of Pinin                                    | IP000418458                | 81,613.20                     | 100.00%                            | 9                         | 13                       | 18                      | 0.12%                       | 13.10%                       | QESDPEDDDVK                    | R                   | K               | 95.00%                                  | 3.69                     | 0.583                  | 0                                | 1                                | 0                                | 0                                | 2                           | 1,356.48                           | 98                  | 108                | TRUE     |                |
| SNU216_PC2_03     | Isoform 1 of Pinin                                    | IP000418458                | 81,613.20                     | 100.00%                            | 9                         | 13                       | 18                      | 0.12%                       | 13.10%                       | QESDPEDDDVKPALQSSVVATSK        | R                   | E               | 95.00%                                  | 4.66                     | 0.478                  | 0                                | 1                                | 2                                | 0                                | 2                           | 2,653.22                           | 98                  | 121                | TRUE     |                |
| SNU216_PC2_03     | Isoform 1 of Pinin                                    | IP000418458                | 81,613.20                     | 100.00%                            | 9                         | 13                       | 18                      | 0.12%                       | 13.10%                       | QDQSQPEEVMDVLMVENVK            | K                   | H               | 95.00%                                  | 4.38                     | 0.448                  | 0                                | 1                                | 1                                | 0                                | 2                           | 2,427.05                           | 378                 | 397                | TRUE     |                |
| SNU216_PC2_03     | Isoform 1 of Pinin                                    | IP000418458                | 81,613.20                     | 100.00%                            | 9                         | 13                       | 18                      | 0.12%                       | 13.10%                       | SLSPGKENVSLDMKEK               | K                   | E               | 95.00%                                  | 3.42                     | 0.42                   | 0                                | 3                                | 2                                | 0                                | 2                           | 1,800.81                           | 441                 | 456                | TRUE     |                |
| SNU216_PC2_03     | Isoform 1 of Pinin                                    | IP000418458                | 81,613.20                     | 100.00%                            | 9                         | 13                       | 18                      | 0.12%                       | 13.10%                       | SLSPGKENVSLDMKESEK             | K                   | E               | 95.00%                                  | 4.72                     | 0.369                  | 0                                | 0                                | 1                                | 0                                | 2                           | 2,387.07                           | 441                 | 461                | TRUE     |                |
| SNU216_PC2_03     | enhancer of zeste 2 isoform b                         | IP000171252;IP000376787    | 81,039.30                     | 100.00%                            | 2                         | 2                        | 2                       | 0.01%                       | 5.94%                        | DTSDREAGTETGGENNDKEEEK         | K                   | K               | 95.00%                                  | 3.67                     | 0.468                  | 0                                | 0                                | 1                                | 0                                | 2                           | 2,735.04                           | 338                 | 361                | TRUE     |                |
| SNU216_PC2_03     | enhancer of zeste 2 isoform b                         | IP000171252;IP000376787    | 81,039.30                     | 100.00%                            | 2                         | 2                        | 2                       | 0.01%                       | 5.94%                        | ESSIAPAPAEVDVTPPR              | K                   | K               | 95.00%                                  | 3.55                     | 0.284                  | 0                                | 0                                | 1                                | 0                                | 2                           | 1,944.90                           | 434                 | 451                | TRUE     |                |
| SNU216_PC2_03     | Isoform C1 of Heterogeneous nuclear ribonucleoprotein | IP000216592                | 32,338.00                     | 100.00%                            | 3                         | 3                        | 3                       | 0.02%                       | 19.10%                       | EAEEGEDDRDSANGEDDS             | K                   | -               | 95.00%                                  | 3.87                     | 0.576                  | 0                                | 1                                | 0                                | 0                                | 2                           | 2,019.66                           | 276                 | 293                | TRUE     |                |
| SNU216_PC2_03     | Isoform C1 of Heterogeneous nuclear ribonucleoprotein | IP000216592                | 32,338.00                     | 100.00%                            | 3                         | 3                        | 3                       | 0.02%                       | 19.10%                       | MESEGGADDSAEAGDOLDDDDNEDNR     | K                   | G               | 95.00%                                  | 3.65                     | 0.452                  | 0                                | 0                                | 1                                | 0                                | 2                           | 2,778.97                           | 238                 | 262                | TRUE</   |                |





Supplemental Table 2. A list of all phosphorylated peptides identified in SNU216 and SNU216-LR.

| MS/MS sample name | Protein name                                         | Protein accession numbers | Protein molecular weight (Da) | Protein identification probability | Number of unique peptides | Number of unique spectra | Number of total spectra | Percentage of total spectra | Percentage sequence coverage | Peptide sequence                 | Previous amino acid | Next amino acid | Best Peptide identification probability | Best SEQUEST XCorr score | Best SEQUEST DcN score | Number of identified +1H spectra | Number of identified +2H spectra | Number of identified +3H spectra | Number of identified +4H spectra | Number of enzymatic termini | Calculate d +1H Peptide Mass (AMU) | Peptide start index | Peptide stop index | Assigned | Other Proteins |
|-------------------|------------------------------------------------------|---------------------------|-------------------------------|------------------------------------|---------------------------|--------------------------|-------------------------|-----------------------------|------------------------------|----------------------------------|---------------------|-----------------|-----------------------------------------|--------------------------|------------------------|----------------------------------|----------------------------------|----------------------------------|----------------------------------|-----------------------------|------------------------------------|---------------------|--------------------|----------|----------------|
| SNU216_PC2_03     | Putative rRNA methyltransferase 3                    | IP000217686               | 96,577.50                     | 100.00%                            | 2                         | 3                        | 3                       | 0.02%                       | 5.19%                        | GTEASSGTAAATLEGEEK               | K                   | D               | 95.00%                                  | 3.09                     | 0.422                  | 0                                | 1                                | 0                                | 0                                | 2                           | 1,903.78                           | 594                 | 612                | TRUE     |                |
| SNU216_PC2_03     | golgi phosphoprotein 4                               | IP000004962               | 81,877.50                     | 100.00%                            | 2                         | 3                        | 3                       | 0.02%                       | 7.47%                        | ELEHNAETYGENDENTDDKNNDEEGEEV     | R                   | D               | 95.00%                                  | 5.6                      | 0.518                  | 0                                | 0                                | 1                                | 0                                | 2                           | 3,602.40                           | 632                 | 661                | TRUE     |                |
| SNU216_PC2_03     | golgi phosphoprotein 4                               | IP000004962               | 81,877.50                     | 100.00%                            | 2                         | 3                        | 3                       | 0.02%                       | 7.47%                        | GREEHYEEEEEEEEEGAIVAEK           | K                   | S               | 95.00%                                  | 3.94                     | 0.325                  | 0                                | 1                                | 1                                | 0                                | 2                           | 2,644.02                           | 668                 | 689                | TRUE     |                |
| SNU216_PC2_03     | Isoform 1 of Ran-binding protein 3                   | IP00026337,IP00456728,IP  | 60,209.90                     | 99.80%                             | 1                         | 1                        | 1                       | 0.01%                       | 2.82%                        | VLSPPKLNEYVSDANR                 | R                   | E               | 95.00%                                  | 3.16                     | 0.294                  | 0                                | 0                                | 1                                | 0                                | 2                           | 1,805.88                           | 331                 | 346                | TRUE     |                |
| SNU216_PC2_03     | CD2-associated protein                               | IP00412771                | 71,454.00                     | 99.80%                             | 1                         | 1                        | 1                       | 0.01%                       | 2.03%                        | FNGGHSPTHSPEK                    | R                   | I               | 95.00%                                  | 2.36                     | 0.323                  | 0                                | 1                                | 0                                | 0                                | 2                           | 1,474.61                           | 505                 | 517                | TRUE     |                |
| SNU216_PC2_03     | Isoform 1 of Eukaryotic translation initiation facto | IP00396370,IP00719752,IP  | 99,040.70                     | 100.00%                            | 2                         | 3                        | 3                       | 0.02%                       | 6.27%                        | ALENGDADEFSFSDPEDFVDDVSEELLGDP   | R                   | D               | 95.00%                                  | 4.27                     | 0.404                  | 0                                | 0                                | 1                                | 0                                | 2                           | 3,675.56                           | 142                 | 174                | TRUE     |                |
| SNU216_PC2_03     | Isoform 1 of Eukaryotic translation initiation facto | IP00396370,IP00719752,IP  | 99,040.70                     | 100.00%                            | 2                         | 3                        | 3                       | 0.02%                       | 6.27%                        | SDSRQAQVSDAGGNENGR               | R                   | A               | 95.00%                                  | 3.41                     | 0.458                  | 0                                | 1                                | 1                                | 0                                | 2                           | 1,885.77                           | 117                 | 134                | TRUE     |                |
| SNU216_PC2_03     | Isoform 1 of Alpha-adducin                           | IP00019901,IP00220158     | 80,955.90                     | 100.00%                            | 4                         | 4                        | 4                       | 0.03%                       | 8.55%                        | AAVVTSPPTTAPHK                   | R                   | E               | 95.00%                                  | 2.62                     | 0.358                  | 0                                | 1                                | 0                                | 0                                | 2                           | 1,553.77                           | 7                   | 21                 | TRUE     |                |
| SNU216_PC2_03     | Isoform 1 of Alpha-adducin                           | IP00019901,IP00220158     | 80,955.90                     | 100.00%                            | 4                         | 4                        | 4                       | 0.03%                       | 8.55%                        | EKSPDPQAVPHPPPSTPK               | K                   | L               | 94.00%                                  | 2.46                     | 0.22                   | 0                                | 1                                | 0                                | 0                                | 2                           | 2,199.09                           | 598                 | 617                | TRUE     |                |
| SNU216_PC2_03     | Isoform 1 of Alpha-adducin                           | IP00019901,IP00220158     | 80,955.90                     | 100.00%                            | 4                         | 4                        | 4                       | 0.03%                       | 8.55%                        | SPGSPVGEETGSGPPK                 | R                   | W               | 95.00%                                  | 3.22                     | 0.483                  | 0                                | 1                                | 0                                | 0                                | 2                           | 1,433.63                           | 355                 | 369                | TRUE     |                |
| SNU216_PC2_03     | Isoform 1 of Alpha-adducin                           | IP00019901,IP00220158     | 80,955.90                     | 100.00%                            | 4                         | 4                        | 4                       | 0.03%                       | 8.55%                        | SPGSPVGEETGSGPPKQWQGEQEFALMR     | R                   | M               | 95.00%                                  | 4.8                      | 0.445                  | 0                                | 0                                | 1                                | 0                                | 2                           | 3,051.39                           | 355                 | 382                | TRUE     |                |
| SNU216_PC2_03     | hypothetical protein LOC91748                        | IP00302594                | 114,989.30                    | 100.00%                            | 3                         | 3                        | 3                       | 0.02%                       | 5.55%                        | AGTFIAPPVYSNITPYQSHLRSPVR        | K                   | L               | 95.00%                                  | 4.51                     | 0.267                  | 0                                | 0                                | 1                                | 0                                | 2                           | 2,851.43                           | 615                 | 639                | TRUE     |                |
| SNU216_PC2_03     | hypothetical protein LOC91748                        | IP00302594                | 114,989.30                    | 100.00%                            | 3                         | 3                        | 3                       | 0.02%                       | 5.55%                        | RASQEANLLTLAQK                   | R                   | A               | 95.00%                                  | 3.75                     | 0.23                   | 0                                | 0                                | 1                                | 0                                | 2                           | 1,622.83                           | 459                 | 472                | TRUE     |                |
| SNU216_PC2_03     | hypothetical protein LOC91748                        | IP00302594                | 114,989.30                    | 100.00%                            | 3                         | 3                        | 3                       | 0.02%                       | 5.55%                        | SHESNAPGSAGGQASEKPR              | R                   | E               | 95.00%                                  | 3.97                     | 0.465                  | 0                                | 0                                | 1                                | 0                                | 2                           | 1,946.84                           | 988                 | 1006               | TRUE     |                |
| SNU216_PC2_03     | calpastatin isoform b                                | IP00413492,IP004465148    | 74,069.30                     | 100.00%                            | 2                         | 2                        | 2                       | 0.01%                       | 4.81%                        | SESELDLESEDFDR                   | R                   | S               | 95.00%                                  | 3.22                     | 0.389                  | 0                                | 1                                | 0                                | 0                                | 2                           | 1,863.75                           | 342                 | 356                | TRUE     |                |
| SNU216_PC2_03     | calpastatin isoform b                                | IP00413492,IP004465148    | 74,069.30                     | 100.00%                            | 2                         | 2                        | 2                       | 0.01%                       | 4.81%                        | SLTPAVPVESKDPKPSGK               | K                   | S               | 95.00%                                  | 2.95                     | 0.353                  | 0                                | 0                                | 1                                | 0                                | 2                           | 1,916.97                           | 111                 | 128                | TRUE     |                |
| SNU216_PC2_03     | Echinoderm microtubule-associated protein-like 4     | IP00001466                | 108,904.20                    | 100.00%                            | 1                         | 2                        | 3                       | 0.02%                       | 1.63%                        | ASPSQPSSQFLQIRK                  | R                   | Q               | 95.00%                                  | 4.12                     | 0.408                  | 0                                | 1                                | 2                                | 0                                | 2                           | 1,809.86                           | 143                 | 158                | TRUE     |                |
| SNU216_PC2_03     | Thyroid receptor-interacting protein 12              | IP00032342                | 220,438.10                    | 99.80%                             | 2                         | 2                        | 2                       | 0.01%                       | 1.46%                        | ALQHTESPTENKPHSK                 | K                   | S               | 95.00%                                  | 3.04                     | 0.324                  | 0                                | 0                                | 1                                | 0                                | 2                           | 1,970.90                           | 94                  | 110                | TRUE     |                |
| SNU216_PC2_03     | Thyroid receptor-interacting protein 12              | IP00032342                | 220,438.10                    | 99.80%                             | 2                         | 2                        | 2                       | 0.01%                       | 1.46%                        | SESPAEPLSLR                      | R                   | R               | 95.00%                                  | 1.97                     | 0.29                   | 0                                | 0                                | 1                                | 0                                | 2                           | 1,362.63                           | 310                 | 321                | TRUE     |                |
| SNU216_PC2_03     | Isoform 2 of Protein FAM61A                          | IP00410590,IP00478300     | 50,555.00                     | 99.70%                             | 2                         | 2                        | 2                       | 0.01%                       | 7.99%                        | SPTMAEQVQTASAHLPAPAAVGR          | K                   | R               | 95.00%                                  | 3.35                     | 0.407                  | 0                                | 0                                | 1                                | 0                                | 2                           | 2,370.13                           | 192                 | 214                | TRUE     |                |
| SNU216_PC2_03     | Isoform 2 of Protein FAM61A                          | IP00410590,IP00478300     | 50,555.00                     | 99.70%                             | 2                         | 2                        | 2                       | 0.01%                       | 7.99%                        | SPVSTRPLPSAQK                    | R                   | A               | 94.50%                                  | 2.53                     | 0.2                    | 0                                | 1                                | 0                                | 0                                | 2                           | 1,534.76                           | 216                 | 229                | TRUE     |                |
| SNU216_PC2_03     | Isoform 1 of Splicing factor, arginine/serine-rich 1 | IP00165995                | 92,560.40                     | 100.00%                            | 3                         | 5                        | 5                       | 0.03%                       | 6.96%                        | KRTPNETTSVLEPK                   | K                   | K               | 95.00%                                  | 2.77                     | 0.265                  | 0                                | 0                                | 1                                | 0                                | 2                           | 1,679.84                           | 483                 | 496                | TRUE     |                |
| SNU216_PC2_03     | Isoform 1 of Splicing factor, arginine/serine-rich 1 | IP00165995                | 92,560.40                     | 100.00%                            | 3                         | 5                        | 5                       | 0.03%                       | 6.96%                        | QRSPIALPVKQEPPIQDAVK             | R                   | R               | 95.00%                                  | 3.8                      | 0.394                  | 0                                | 0                                | 1                                | 0                                | 2                           | 2,294.23                           | 209                 | 228                | TRUE     |                |
| SNU216_PC2_03     | Isoform 1 of Splicing factor, arginine/serine-rich 1 | IP00165995                | 92,560.40                     | 100.00%                            | 3                         | 5                        | 5                       | 0.03%                       | 6.96%                        | SKFDSDEEEDTENVEAASSGK            | R                   | V               | 95.00%                                  | 5.14                     | 0.531                  | 0                                | 1                                | 1                                | 0                                | 2                           | 2,482.96                           | 286                 | 307                | TRUE     |                |
| SNU216_PC2_03     | Isoform 1 of SH3 domain-binding protein 1            | IP00444788,IP00445123,IP  | 75,714.70                     | 100.00%                            | 5                         | 6                        | 6                       | 0.04%                       | 10.10%                       | ENHGQADHSPSMATHTFPR              | R                   | V               | 95.00%                                  | 3.75                     | 0.288                  | 0                                | 0                                | 1                                | 1                                | 2                           | 2,199.90                           | 254                 | 272                | TRUE     |                |
| SNU216_PC2_03     | Isoform 1 of SH3 domain-binding protein 1            | IP00444788,IP00445123,IP  | 75,714.70                     | 100.00%                            | 5                         | 6                        | 6                       | 0.04%                       | 10.10%                       | ERTESEVPRRPASPK                  | K                   | V               | 95.00%                                  | 2.37                     | 0.413                  | 0                                | 1                                | 0                                | 0                                | 2                           | 1,759.84                           | 532                 | 546                | TRUE     |                |
| SNU216_PC2_03     | Isoform 1 of SH3 domain-binding protein 1            | IP00444788,IP00445123,IP  | 75,714.70                     | 100.00%                            | 5                         | 6                        | 6                       | 0.04%                       | 10.10%                       | NGSSGQLGGSPGSHSHTTMANK           | K                   | V               | 95.00%                                  | 3.48                     | 0.272                  | 0                                | 0                                | 1                                | 0                                | 2                           | 2,278.95                           | 165                 | 187                | TRUE     |                |
| SNU216_PC2_03     | Isoform 1 of SH3 domain-binding protein 1            | IP00444788,IP00445123,IP  | 75,714.70                     | 100.00%                            | 5                         | 6                        | 6                       | 0.04%                       | 10.10%                       | SPETAAPVEDMAR                    | R                   | R               | 95.00%                                  | 2.58                     | 0.362                  | 0                                | 1                                | 0                                | 0                                | 2                           | 1,550.66                           | 550                 | 563                | TRUE     |                |
| SNU216_PC2_03     | Isoform 1 of SH3 domain-binding protein 1            | IP00444788,IP00445123,IP  | 75,714.70                     | 100.00%                            | 5                         | 6                        | 6                       | 0.04%                       | 10.10%                       | TESEVPRRPASPK                    | R                   | V               | 95.00%                                  | 3.27                     | 0.447                  | 0                                | 1                                | 0                                | 0                                | 2                           | 1,474.69                           | 534                 | 546                | TRUE     |                |
| SNU216_PC2_03     | Isoform Beta of ATP-dependent DNA helicase Q5        | IP00185769                | 108,859.20                    | 99.80%                             | 2                         | 2                        | 2                       | 0.01%                       | 3.73%                        | GEVPGSGAHYGGSPPEKK               | R                   | A               | 95.00%                                  | 2.48                     | 0.335                  | 0                                | 1                                | 0                                | 0                                | 2                           | 1,833.82                           | 714                 | 731                | TRUE     |                |
| SNU216_PC2_03     | Isoform Beta of ATP-dependent DNA helicase Q5        | IP00185769                | 108,859.20                    | 99.80%                             | 2                         | 2                        | 2                       | 0.01%                       | 3.73%                        | YDEGSGSGSDGDEGRDAHNR             | R                   | E               | 95.00%                                  | 2.93                     | 0.301                  | 0                                | 0                                | 1                                | 0                                | 2                           | 2,181.79                           | 484                 | 502                | TRUE     |                |
| SNU216_PC2_03     | Cell division cycle 2-related protein kinase 7       | IP00021175                | 164,159.20                    | 99.90%                             | 2                         | 3                        | 3                       | 0.02%                       | 3.15%                        | HLTLDLPLPELPGDLSPPDSPEPK         | R                   | A               | 95.00%                                  | 4.04                     | 0.3                    | 0                                | 0                                | 2                                | 0                                | 2                           | 2,891.35                           | 664                 | 689                | TRUE     |                |
| SNU216_PC2_03     | Cell division cycle 2-related protein kinase 7       | IP00021175                | 164,159.20                    | 99.90%                             | 2                         | 2                        | 3                       | 0.02%                       | 3.15%                        | HSSISPVRLPLNLSIAELSR             | R                   | K               | 95.00%                                  | 3.32                     | 0.376                  | 0                                | 0                                | 1                                | 0                                | 2                           | 2,380.14                           | 381                 | 401                | TRUE     |                |
| SNU216_PC2_03     | Tyrosine-protein phosphatase non-receptor type       | IP00289082                | 88,121.60                     | 99.80%                             | 2                         | 2                        | 2                       | 0.01%                       | 5.90%                        | DVDVSDSPPLPER                    | K                   | T               | 95.00%                                  | 3.01                     | 0.342                  | 0                                | 1                                | 0                                | 0                                | 2                           | 1,731.75                           | 666                 | 680                | TRUE     |                |
| SNU216_PC2_03     | Tyrosine-protein phosphatase non-receptor type       | IP00289082                | 88,121.60                     | 99.80%                             | 2                         | 2                        | 2                       | 0.01%                       | 5.90%                        | IADGVNEINTENMISSIEPEKQDSPPPKPPR  | K                   | T               | 95.00%                                  | 5.4                      | 0.449                  | 0                                | 0                                | 1                                | 2                                | 3,482.65                    | 309                                | 339                 | TRUE               |          |                |
| SNU216_PC2_03     | Isoform 1 of Peroxisome proliferator-activated re    | IP00427522                | 168,441.60                    | 99.80%                             | 1                         | 1                        | 1                       | 0.01%                       | 1.52%                        | AKSPSSGSGSGSHSTSSSGMK            | K                   | S               | 95.00%                                  | 3.52                     | 0.409                  | 0                                | 0                                | 1                                | 0                                | 2                           | 2,291.96                           | 1221                | 1244               | TRUE     |                |
| SNU216_PC2_03     | Ubiquitin carboxyl-terminal hydrolase 8              | IP00030915                | 127,527.40                    | 99.70%                             | 2                         | 2                        | 2                       | 0.01%                       | 1.52%                        | SYSSPDITQAIQEEK                  | R                   | K               | 88.30%                                  | 3.58                     | 0.0219                 | 0                                | 1                                | 0                                | 0                                | 2                           | 1,904.82                           | 716                 | 731                | TRUE     |                |
| SNU216_PC2_03     | Ubiquitin carboxyl-terminal hydrolase 8              | IP00030915                | 127,527.40                    | 99.70%                             | 2                         | 2                        | 2                       | 0.01%                       | 1.52%                        | SYSSPDITQAIQEEKR                 | R                   | K               | 93.40%                                  | 3.7                      | 0.0356                 | 0                                | 1                                | 0                                | 0                                | 2                           | 2,060.92                           | 716                 | 732                | TRUE     |                |
| SNU216_PC2_03     | General vesicular transport factor p115              | IP00743314                | 107,909.70                    | 100.00%                            | 4                         | 6                        | 6                       | 0.04%                       | 3.74%                        | DLGHPVEEDELLEGSDQGEDEDESEDPGK    | K                   | D               | 95.00%                                  | 5.81                     | 0.527                  | 0                                | 0                                | 1                                | 0                                | 2                           | 3,323.24                           | 929                 | 957                | TRUE     |                |
| SNU216_PC2_03     | General vesicular transport factor p115              | IP00743314                | 107,909.70                    | 100.00%                            | 4                         | 6                        | 6                       | 0.04%                       | 3.74%                        | DLGHPVEEDELLEGSDQGEDEDESEDPGK    | K                   | -               | 95.00%                                  | 6.1                      | 0.562                  | 0                                | 0                                | 1                                | 0                                | 2                           | 3,916.52                           | 929                 | 962                | TRUE     |                |
| SNU216_PC2_03     | General vesicular transport factor p115              | IP00743314                | 107,909.70                    | 100.00%                            | 4                         | 6                        | 6                       | 0.04%                       | 3.74%                        | LDLGHHPVEEDELLEGSDQGEDEDESEDPG   | K                   | D               | 95.00%                                  | 5.62                     | 0.533                  | 0                                | 1                                | 1                                | 2                                | 3,564.42                    | 927                                | 957                 | TRUE               |          |                |
| SNU216_PC2_03     | General vesicular transport factor p115              | IP00743314                | 107,909.70                    | 100.00%                            | 4                         | 6                        | 6                       | 0.04%                       | 3.74%                        | LDLGHHPVEEDELLEGSDQGEDEDESEDPG   | K                   | -               | 95.00%                                  | 6.8                      | 0.602                  | 0                                | 0                                | 1                                | 1                                | 2                           | 4,157.70                           | 927                 | 962                | TRUE     |                |
| SNU216_PC2_03     | Isoform 4 of Caldesmon                               | IP00218696,IP00333771     | 61,213.30                     | 100.00%                            | 3                         | 4                        | 4                       | 0.03%                       | 4.65%                        | QSDVKVTSPTIK                     | K                   | -               | 91.40%                                  | 2.25                     | 0.199                  | 0                                | 1                                | 0                                | 0                                | 2                           | 1,269.61                           | 521                 | 531                | TRUE     |                |
| SNU216_PC2_03     | Isoform 4 of Caldesmon                               | IP00218696,IP00333771     | 61,213.30                     | 100.00%                            | 3                         | 4                        | 4                       | 0.03%                       | 4.65%                        | QSDVKVTSPTIK                     | K                   | -               | 95.00%                                  | 2.74                     | 0.173                  | 0                                | 1                                | 0                                | 0                                | 2                           | 1,368.68                           | 521                 | 532                | TRUE     |                |
| SNU216_PC2_03     | Isoform 4 of Caldesmon                               | IP00218696,IP00333771     | 61,213.30                     | 100.00%                            | 3                         | 4                        | 4                       | 0.03%                       | 4.65%                        | RGSIGENQIKDEK                    | K                   | I               | 95.00%                                  | 3.08                     | 0.223                  | 0                                | 1                                | 1                                | 0                                | 2                           | 1,553.73                           | 194                 | 206                | TRUE     |                |
| SNU216_PC2_03     | Isoform Beta of LIM domain and actin-binding pr      | IP00008918                | 85,226.30                     | 100.00%                            | 8                         | 13                       | 21                      | 0.14%                       | 16.50%                       | EGHSLEMENENLVENGADSDDDNSFLK      | K                   | Q               | 95.00%                                  | 6.55                     | 0.473                  | 0                                | 0                                | 2                                | 0                                | 2                           | 3,217.28                           | 668                 | 695                | TRUE     |                |
| SNU216_PC2_03     | Isoform Beta of LIM domain and actin-binding pr      | IP00008918                | 85,226.30                     | 100.00%                            | 8                         | 13                       | 21                      | 0.14%                       | 16.50%                       | ETPHSPGVEDAPIAK                  | R                   | V               | 95.00%                                  | 2.92                     | 0.401                  | 0                                | 1                                | 0                                | 0                                | 2                           | 1,627.74                           | 486                 | 500                | TRUE     |                |
| SNU216_PC2_03     | Isoform Beta of LIM domain and actin-binding pr      | IP00008918                | 85,226.30                     | 100.00%                            | 8                         | 13                       | 21                      | 0.14%                       | 16.50%                       | KISENSYSDDLLEIGPGQLSSSTFDSEK     | R                   | N               | 95.00%                                  | 5.75                     | 0.533                  | 0                                | 0                                | 1                                | 0                                | 2                           | 3,126.40                           | 223                 | 250                | TRUE     |                |
| SNU216_PC2_03     | Isoform Beta of LIM domain and actin-binding pr      | IP00008918                | 85,226.30                     | 100.00%                            | 8                         | 13                       | 21                      | 0.14%                       | 16.50%                       | KISENSYSDDLLEIGPGQLSSSTFDSEKNESR | R                   | R               | 95.00%                                  | 7.91                     | 0.501                  | 0                                | 0                                | 1                                | 1                                | 2                           | 3,612.62                           | 223                 | 254                | TRUE     |                |
| SNU216_PC2_03     | Isoform Beta of LIM domain and actin-binding pr      | IP00008918                | 85,226.30                     | 100.00%                            | 8                         | 13                       | 21                      | 0.14%                       | 16.50%                       | LRSPPEALVQGR                     | R                   | Y               | 95.00%                                  | 3.42                     | 0.312                  | 0                                | 1                                | 2                                | 0                                | 2                           | 1,402.72                           | 130                 | 141                | TRUE     |                |
| SNU216_PC2_03     | Isoform Beta of LIM domain and actin-binding pr      | IP00008918                | 85,226.30                     | 100.00%                            | 8                         | 13                       | 21                      | 0.14%                       | 16.50%                       | SEVQQPVHKKPLSPDSR                | K                   | A               | 95.00%                                  | 3.99                     | 0.46                   | 0                                | 1                                | 3                                | 1                                | 2                           | 1,980.95                           | 350                 | 366                | TRUE     |                |
| SNU216_PC         |                                                      |                           |                               |                                    |                           |                          |                         |                             |                              |                                  |                     |                 |                                         |                          |                        |                                  |                                  |                                  |                                  |                             |                                    |                     |                    |          |                |
