# Supplementary material for: Phosphoproteomic analysis identifies activated MET-axis PI3K/AKT and MAPK/ERK in lapatinib-resistant cancer cell line
Source: PubMed Central journal article supplement — Exp Mol Med. 2013 Nov 22;45(11):e64–. doi: 10.1038/emm.2013.115 (PMC3849569; doi:10.1038/emm.2013.115), 2013-11-22
Supplement: emm2013115x9.pdf [file emm2013115x9.pdf]

Supplemental Table 3. A list of phosphorylation sites and their counts in SNU216 and SNU216-LR.

| Protein accession | Protein name                                                          | Site   | Best Ascore <sup>1</sup> | Localization Probability <sup>2</sup> | Total No. |           | SNU216 |      |      |      |      |      |      |      |      |      |      |      |      |      |      |      |      |      |      |      |      |      |      |      | SNU216-LR |      |      |      |      |      |      |      |      |      |      |      |   |   |   |   |   |   |   |  |  |  |  |  |
|-------------------|-----------------------------------------------------------------------|--------|--------------------------|---------------------------------------|-----------|-----------|--------|------|------|------|------|------|------|------|------|------|------|------|------|------|------|------|------|------|------|------|------|------|------|------|-----------|------|------|------|------|------|------|------|------|------|------|------|---|---|---|---|---|---|---|--|--|--|--|--|
|                   |                                                                       |        |                          |                                       | SNU 216   | SNU 216LR | 1_01   | 2_01 | 3_01 | 4_01 | 5_01 | 6_01 | 1_02 | 2_02 | 3_02 | 4_02 | 5_02 | 6_02 | 1_03 | 2_03 | 3_03 | 4_03 | 5_03 | 6_03 | 1_01 | 2_01 | 3_01 | 4_01 | 5_01 | 6_01 | 1_02      | 2_02 | 3_02 | 4_02 | 5_02 | 6_02 | 1_03 | 2_03 | 3_03 | 4_03 | 5_03 | 6_03 |   |   |   |   |   |   |   |  |  |  |  |  |
| IPI00000162       | Isoform 1 of Protein C14orf120                                        | S 142  | 100% (131.75)            | 1.0000                                | * 2       | * 1       | 0      | 0    | 0    | 0    | 0    | 0    | 0    | 0    | 0    | 1    | 0    | 0    | 0    | 0    | 0    | 0    | 0    | 1    | 0    | 0    | 0    | 0    | 0    | 0    | 0         | 0    | 0    | 0    | 0    | 0    | 0    | 0    | 0    | 0    | 0    | 0    | 0 | 0 | 0 | 0 | 0 | 0 | 0 |  |  |  |  |  |
| IPI00000162       | Isoform 1 of Protein C14orf120                                        | S 143  | 100% (133.10)            | 1.0000                                | * 4       | * 5       | 0      | 0    | 0    | 1    | 0    | 0    | 0    | 0    | 0    | 0    | 1    | 0    | 0    | 0    | 0    | 0    | 0    | 1    | 0    | 0    | 0    | 0    | 0    | 0    | 0         | 0    | 0    | 0    | 0    | 0    | 0    | 0    | 0    | 0    | 0    | 0    | 0 | 0 | 0 | 0 | 0 | 0 | 0 |  |  |  |  |  |
| IPI00000192       | Isoform F of SON protein                                              | S 1697 | 100% (92.15)             | 1.0000                                | # 21      | # 17      | 6      | 2    | 0    | 0    | 0    | 0    | 4    | 3    | 0    | 0    | 0    | 0    | 0    | 5    | 1    | 0    | 0    | 0    | 0    | 0    | 0    | 0    | 5    | 2    | 0         | 0    | 0    | 0    | 0    | 3    | 2    | 0    | 0    | 0    | 0    | 0    | 0 | 4 | 1 | 0 | 0 | 0 | 0 |  |  |  |  |  |
| IPI00000192       | Isoform F of SON protein                                              | S 2129 | 100% (61.62)             | 1.0000                                | * 4       | * 9       | 1      | 1    | 1    | 0    | 0    | 0    | 0    | 0    | 1    | 0    | 0    | 0    | 0    | 1    | 0    | 0    | 0    | 0    | 0    | 0    | 0    | 0    | 3    | 1    | 0         | 0    | 0    | 0    | 0    | 2    | 1    | 0    | 0    | 0    | 0    | 0    | 0 | 0 | 0 | 0 | 0 | 0 | 0 |  |  |  |  |  |
| IPI00000279       | Hypothetical protein LEREPO4                                          | S 381  | 100% (1,000.00)          | 1.0000                                | * 5       | * 7       | 0      | 0    | 1    | 1    | 0    | 0    | 0    | 0    | 1    | 1    | 0    | 0    | 0    | 0    | 0    | 0    | 1    | 0    | 0    | 0    | 0    | 1    | 0    | 0    | 0         | 0    | 2    | 1    | 0    | 0    | 0    | 0    | 0    | 0    | 0    | 0    | 0 | 0 | 0 | 0 | 0 | 0 | 0 |  |  |  |  |  |
| IPI00000634       | Coiled-coil domain-containing protein 6                               | S 240  | 100% (1,000.00)          | 1.0000                                | * 14      | * 10      | 1      | 1    | 2    | 1    | 0    | 0    | 1    | 2    | 1    | 2    | 1    | 0    | 0    | 1    | 0    | 2    | 1    | 0    | 0    | 1    | 1    | 1    | 1    | 0    | 0         | 0    | 0    | 1    | 1    | 0    | 0    | 0    | 0    | 0    | 0    | 0    | 0 | 0 | 0 | 0 | 0 | 0 | 0 |  |  |  |  |  |
| IPI00000634       | Coiled-coil domain-containing protein 6                               | S 244  | 100% (1,000.00)          | 1.0000                                | # 20      | # 15      | 1      | 1    | 2    | 2    | 0    | 0    | 1    | 2    | 3    | 2    | 0    | 0    | 0    | 1    | 0    | 3    | 2    | 0    | 0    | 0    | 0    | 1    | 2    | 2    | 2         | 0    | 0    | 0    | 0    | 0    | 0    | 0    | 0    | 0    | 0    | 0    | 0 | 0 | 0 | 0 | 0 | 0 | 0 |  |  |  |  |  |
| IPI00000634       | Coiled-coil domain-containing protein 6                               | S 254  | 100% (65.44)             | 1.0000                                | * 1       | * 3       | 0      | 0    | 1    | 0    | 0    | 0    | 0    | 0    | 0    | 0    | 0    | 0    | 0    | 0    | 0    | 0    | 0    | 0    | 0    | 0    | 0    | 0    | 0    | 0    | 0         | 0    | 0    | 0    | 0    | 0    | 0    | 0    | 0    | 0    | 0    | 0    | 0 | 0 | 0 | 0 | 0 | 0 |   |  |  |  |  |  |
| IPI00000690       | Isoform 1 of Programmed cell death protein 8, mitochondrial precursor | S 100  | 100% (1,000.00)          | 1.0000                                | * 1       | * 0       | 0      | 1    | 0    | 0    | 0    | 0    | 0    | 0    | 0    | 0    | 0    | 0    | 0    | 0    | 0    | 0    | 0    | 0    | 0    | 0    | 0    | 0    | 0    | 0    | 0         | 0    | 0    | 0    | 0    | 0    | 0    | 0    | 0    | 0    | 0    | 0    | 0 | 0 | 0 | 0 | 0 | 0 |   |  |  |  |  |  |
| IPI00000733       | U3 small nucleolar RNA-associated protein 18 homolog                  | S 121  | 100% (1,000.00)          | 1.0000                                | # 24      | # 24      | 1      | 1    | 5    | 1    | 1    | 0    | 1    | 1    | 5    | 1    | 1    | 0    | 1    | 1    | 4    | 0    | 0    | 0    | 0    | 0    | 1    | 4    | 1    | 1    | 0         | 0    | 0    | 0    | 0    | 0    | 0    | 0    | 0    | 0    | 0    | 0    | 0 | 0 | 0 | 0 | 0 | 0 | 0 |  |  |  |  |  |
| IPI00000733       | U3 small nucleolar RNA-associated protein 18 homolog                  | S 124  | 100% (1,000.00)          | 1.0000                                | # 21      | # 21      | 1      | 1    | 4    | 1    | 1    | 0    | 1    | 1    | 4    | 1    | 1    | 0    | 1    | 1    | 3    | 0    | 0    | 0    | 0    | 0    | 1    | 3    | 1    | 1    | 0         | 0    | 0    | 0    | 0    | 0    | 0    | 0    | 0    | 0    | 0    | 0    | 0 | 0 | 0 | 0 | 0 | 0 | 0 |  |  |  |  |  |
| IPI00000733       | U3 small nucleolar RNA-associated protein 18 homolog                  | S 210  | 100% (71.86)             | 1.0000                                | * 4       | * 5       | 0      | 0    | 2    | 0    | 0    | 0    | 0    | 0    | 0    | 0    | 0    | 0    | 0    | 0    | 0    | 0    | 0    | 0    | 0    | 0    | 0    | 0    | 0    | 0    | 0         | 0    | 0    | 0    | 0    | 0    | 0    | 0    | 0    | 0    | 0    | 0    | 0 | 0 | 0 | 0 | 0 | 0 |   |  |  |  |  |  |
| IPI00000856       | Isoform 1 of Pleckstrin homology domain-containing family C member 1  | S 351  | 100% (43.39)             | 1.0000                                | * 1       | * 2       | 0      | 0    | 0    | 0    | 0    | 0    | 0    | 0    | 0    | 0    | 0    | 0    | 0    | 0    | 0    | 0    | 0    | 0    | 0    | 0    | 0    | 0    | 0    | 0    | 0         | 0    | 0    | 0    | 0    | 0    | 0    | 0    | 0    | 0    | 0    | 0    | 0 | 0 | 0 | 0 | 0 | 0 |   |  |  |  |  |  |
| IPI00000856       | Isoform 1 of Pleckstrin homology domain-containing family C member 1  | S 666  | 100% (77.20)             | 1.0000                                | 0         | * 1       | 0      | 0    | 0    | 0    | 0    | 0    | 0    | 0    | 0    | 0    | 0    | 0    | 0    | 0    | 0    | 0    | 0    | 0    | 0    | 0    | 0    | 0    | 0    | 0    | 0         | 0    | 0    | 0    | 0    | 0    | 0    | 0    | 0    | 0    | 0    | 0    | 0 | 0 | 0 | 0 | 0 | 0 |   |  |  |  |  |  |
| IPI00001159       | GCN1-like protein 1                                                   | S 1390 | 100% (1,000.00)          | 1.0000                                | * 4       | * 4       | 0      | 0    | 1    | 1    | 0    | 0    | 0    | 0    | 0    | 0    | 1    | 0    | 1    | 0    | 0    | 0    | 0    | 0    | 0    | 0    | 0    | 0    | 0    | 0    | 0         | 0    | 0    | 0    | 0    | 0    | 0    | 0    | 0    | 0    | 0    | 0    | 0 | 0 | 0 | 0 | 0 | 0 | 0 |  |  |  |  |  |
| IPI00001364       | Isoform A of GC-rich sequence DNA-binding factor homolog              | S 262  | 100% (1,000.00)          | 1.0000                                | * 10      | * 10      | 0      | 2    | 0    | 0    | 0    | 0    | 0    | 4    | 0    | 0    | 0    | 0    | 0    | 0    | 0    | 0    | 0    | 0    | 0    | 0    | 0    | 0    | 0    | 0    | 0         | 0    | 0    | 0    | 0    | 0    | 0    | 0    | 0    | 0    | 0    | 0    | 0 | 0 | 0 | 0 | 0 | 0 |   |  |  |  |  |  |
| IPI00001632       | hypothetical protein LOC57648                                         | S 545  | 100% (1,000.00)          | 1.0000                                | * 5       | * 8       | 1      | 0    | 0    | 0    | 0    | 0    | 0    | 1    | 1    | 0    | 0    | 0    | 0    | 0    | 0    | 0    | 0    | 0    | 0    | 0    | 0    | 0    | 0    | 0    | 0         | 0    | 0    | 0    | 0    | 0    | 0    | 0    | 0    | 0    | 0    | 0    | 0 | 0 | 0 | 0 | 0 | 0 |   |  |  |  |  |  |
| IPI00001632       | hypothetical protein LOC57648                                         | S 929  | 100% (41.94)             | 1.0000                                | * 10      | * 8       | 1      | 1    | 1    | 0    | 1    | 0    | 1    | 1    | 1    | 0    | 0    | 0    | 0    | 0    | 1    | 1    | 0    | 0    | 0    | 0    | 1    | 1    | 1    | 0    | 0         | 0    | 0    | 0    | 0    | 0    | 0    | 0    | 0    | 0    | 0    | 0    | 0 | 0 | 0 | 0 | 0 | 0 | 0 |  |  |  |  |  |
| IPI00001661       | RCC1 protein                                                          | S 11   | 100% (1,000.00)          | 1.0000                                | # 21      | # 18      | 2      | 1    | 1    | 4    | 0    | 0    | 1    | 1    | 2    | 2    | 0    | 0    | 0    | 1    | 1    | 2    | 3    | 0    | 0    | 1    | 0    | 2    | 2    | 0    | 0         | 0    | 0    | 0    | 0    | 0    | 0    | 0    | 0    | 0    | 0    | 0    | 0 | 0 | 0 | 0 | 0 | 0 | 0 |  |  |  |  |  |
| IPI00001707       | Isoform 1 of Bromodomain-containing protein 7                         | S 279  | 100% (1,000.00)          | 1.0000                                | * 10      | * 9       | 0      | 2    | 2    | 0    | 0    | 0    | 0    | 0    | 2    | 2    | 0    | 0    | 0    | 0    | 0    | 0    | 0    | 0    | 0    | 0    | 0    | 0    | 0    | 0    | 0         | 0    | 0    | 0    | 0    | 0    | 0    | 0    | 0    | 0    | 0    | 0    | 0 | 0 | 0 | 0 | 0 | 0 | 0 |  |  |  |  |  |
| IPI00001735       | nuclear receptor co-repressor 2                                       | S 149  | 100% (89.11)             | 1.0000                                | * 9       | * 6       | 1      | 0    | 0    | 0    | 0    | 0    | 4    | 1    | 0    | 0    | 0    | 0    | 0    | 0    | 0    | 0    | 0    | 0    | 0    | 0    | 0    | 0    | 0    | 0    | 0         | 0    | 0    | 0    | 0    | 0    | 0    | 0    | 0    | 0    | 0    | 0    | 0 | 0 | 0 | 0 | 0 | 0 |   |  |  |  |  |  |
| IPI00001735       | nuclear receptor co-repressor 2                                       | S 152  | 100% (63.65)             | 1.0000                                | * 9       | * 6       | 1      | 0    | 0    | 0    | 0    | 0    | 4    | 1    | 0    | 0    | 0    | 0    | 0    | 0    | 0    | 0    | 0    | 0    | 0    | 0    | 0    | 0    | 0    | 0    | 0         | 0    | 0    | 0    | 0    | 0    | 0    | 0    | 0    | 0    | 0    | 0    | 0 | 0 | 0 | 0 | 0 | 0 | 0 |  |  |  |  |  |
| IPI00001735       | nuclear receptor co-repressor 2                                       | S 956  | 100% (1,000.00)          | 1.0000                                | * 1       | * 2       | 0      | 0    | 0    | 0    | 0    | 0    | 0    | 0    | 0    | 0    | 0    | 0    | 0    | 0    | 0    | 0    | 0    | 0    | 0    | 0    | 0    | 0    | 0    | 0    | 0         | 0    | 0    | 0    | 0    | 0    | 0    | 0    | 0    | 0    | 0    | 0    | 0 | 0 | 0 | 0 | 0 | 0 | 0 |  |  |  |  |  |
| IPI00001738       | Nuclear pore complex protein Nup88                                    | S 517  | 100% (1,000.00)          | 1.0000                                | * 6       | * 6       | 0      | 0    | 1    | 0    | 0    | 0    | 0    | 0    | 1    | 1    | 0    | 0    | 0    | 0    | 0    | 0    | 0    | 0    | 0    | 0    | 0    | 0    | 0    | 0    | 0         | 0    | 0    | 0    | 0    | 0    | 0    | 0    | 0    | 0    | 0    | 0    | 0 | 0 | 0 | 0 | 0 | 0 | 0 |  |  |  |  |  |
| IPI00001813       | CTD-binding SR-like protein rA9                                       | S 1229 | 100% (51.00)             | 1.0000                                | 0         | * 5       | 0      | 0    | 0    | 0    | 0    | 0    | 0    | 0    | 0    | 0    | 0    | 0    | 0    | 0    | 0    | 0    | 0    | 0    | 0    | 0    | 0    | 0    | 0    | 0    | 0         | 0    | 0    | 0    | 0    | 0    | 0    | 0    | 0    | 0    | 0    | 0    | 0 | 0 | 0 | 0 | 0 | 0 |   |  |  |  |  |  |
| IPI00001813       | CTD-binding SR-like protein rA9                                       | S 1359 | 100% (1,000.00)          | 1.0000                                | * 7       | * 5       | 2      | 1    | 0    | 0    | 0    | 0    | 0    | 2    | 0    | 0    | 0    | 0    | 0    | 0    | 0    | 0    | 0    | 0    | 0    | 0    | 0    | 0    | 0    | 0    | 0         | 0    | 0    | 0    | 0    | 0    | 0    | 0    | 0    | 0    | 0    | 0    | 0 | 0 | 0 | 0 | 0 | 0 |   |  |  |  |  |  |
| IPI00001813       | CTD-binding SR-like protein rA9                                       | S 1360 | 100% (1,000.00)          | 1.0000                                | * 12      | * 8       | 3      | 4    | 0    | 0    | 0    | 0    | 1    | 1    | 0    | 0    | 0    | 0    | 0    | 0    | 0    | 0    | 0    | 0    | 0    | 0    | 0    | 0    | 0    | 0    | 0         | 0    | 0    | 0    | 0    | 0    | 0    | 0    | 0    | 0    | 0    | 0    | 0 | 0 | 0 | 0 | 0 | 0 | 0 |  |  |  |  |  |
| IPI00002054       | 132 kDa protein                                                       | S 1078 | 100% (1,000.00)          | 1.0000                                | * 3       | * 2       | 1      | 0    | 0    | 0    | 0    | 0    | 0    | 1    | 0    | 0    | 0    | 0    | 0    | 0    | 0    | 0    | 0    | 0    | 0    | 0    | 0    | 0    | 0    | 0    | 0         |      |      |      |      |      |      |      |      |      |      |      |   |   |   |   |   |   |   |  |  |  |  |  |

Supplemental Table 3. A list of phosphorylation sites and their counts in SNU216 and SNU216-LR.

| Protein accession | Protein name                                        | Site   | Best AScore <sup>1</sup> | Localization Probability <sup>2</sup> | Total No. |    | SNU216  |           |    |    |    |    |    |    |    |    |    |    |    |    |    |    |    |    | SNU216-LR |    |    |    |    |    |    |    |    |    |    |    |    |    |    |    |   |   |   |   |
|-------------------|-----------------------------------------------------|--------|--------------------------|---------------------------------------|-----------|----|---------|-----------|----|----|----|----|----|----|----|----|----|----|----|----|----|----|----|----|-----------|----|----|----|----|----|----|----|----|----|----|----|----|----|----|----|---|---|---|---|
|                   |                                                     |        |                          |                                       |           |    | SNU 216 | SNU 216LR | 01 | 02 | 03 | 04 | 05 | 06 | 07 | 08 | 09 | 10 | 11 | 12 | 13 | 14 | 15 | 16 | 01        | 02 | 03 | 04 | 05 | 06 | 07 | 08 | 09 | 10 | 11 | 12 | 13 | 14 | 15 | 16 |   |   |   |   |
| IP100004497       | Breakpoint cluster region protein                   | S 993  | 100% (1,000.00)          | 1.0000                                | +         | 1  | 0       | 0         | 1  | 0  | 0  | 0  | 0  | 0  | 0  | 0  | 0  | 0  | 0  | 0  | 0  | 0  | 0  | 0  | 0         | 0  | 0  | 0  | 0  | 0  | 0  | 0  | 0  | 0  | 0  | 0  | 0  | 0  | 0  |    |   |   |   |   |
| IP100004795       | Methylosome subunit pICln                           | S 102  | 100% (83.14)             | 1.0000                                | ■         | 24 | ■       | 22        | 1  | 1  | 1  | 1  | 3  | 1  | 1  | 1  | 1  | 1  | 4  | 0  | 1  | 1  | 0  | 1  | 4         | 1  | 0  | 0  | 1  | 3  | 3  | 1  | 0  | 1  | 0  | 3  | 1  | 0  | 1  | 1  | 3 | 3 | 0 |   |
| IP100004970       | Small subunit processome component 20 homolog       | S 2601 | 100% (1,000.00)          | 1.0000                                | +         | 3  | +       | 3         | 1  | 0  | 0  | 0  | 0  | 0  | 1  | 0  | 0  | 0  | 0  | 0  | 0  | 1  | 0  | 0  | 0         | 0  | 1  | 0  | 0  | 0  | 0  | 0  | 1  | 0  | 0  | 0  | 0  | 0  | 1  | 0  | 0 | 0 | 0 |   |
| IP100005024       | Isoform 1 of Myb-binding protein 1A                 | S 775  | 100% (104.80)            | 1.0000                                | ■         | 10 | ■       | 12        | 2  | 2  | 1  | 0  | 0  | 0  | 1  | 1  | 0  | 0  | 0  | 0  | 0  | 0  | 1  | 2  | 0         | 0  | 0  | 0  | 0  | 0  | 0  | 2  | 3  | 1  | 0  | 0  | 0  | 0  | 1  | 1  | 1 | 0 | 0 | 0 |
| IP100005260       | proteasome (prosome, macropain) activator subunit 4 | S 1007 | 100% (67.91)             | 1.0000                                | 0         | +  | 2       | 0         | 0  | 0  | 0  | 0  | 0  | 0  | 0  | 0  | 0  | 0  | 0  | 0  | 0  | 0  | 0  | 0  | 0         | 0  | 0  | 0  | 0  | 0  | 0  | 0  | 0  | 0  | 0  | 1  | 0  | 0  | 0  | 0  | 0 | 0 |   |   |
| IP100005264       | Isoform 2 of Plakophilin-2                          | S 151  | 100% (1,000.00)          | 1.0000                                | +         | 1  | 0       | 0         | 1  | 0  | 0  | 0  | 0  | 0  | 0  | 0  | 0  | 0  | 0  | 0  | 0  | 0  | 0  | 0  | 0         | 0  | 0  | 0  | 0  | 0  | 0  | 0  | 0  | 0  | 0  | 0  | 0  | 0  | 0  | 0  | 0 | 0 | 0 |   |
| IP100005264       | Isoform 2 of Plakophilin-2                          | S 154  | 100% (1,000.00)          | 1.0000                                | +         | 2  | 0       | 0         | 1  | 0  | 0  | 0  | 0  | 0  | 0  | 0  | 0  | 0  | 0  | 1  | 0  | 0  | 0  | 0  | 0         | 0  | 0  | 0  | 0  | 0  | 0  | 0  | 0  | 0  | 0  | 0  | 0  | 0  | 0  | 0  | 0 | 0 | 0 | 0 |
| IP100005264       | Isoform 2 of Plakophilin-2                          | S 155  | 100% (1,000.00)          | 1.0000                                | +         | 2  | +       | 1         | 0  | 1  | 0  | 0  | 0  | 0  | 0  | 0  | 1  | 0  | 0  | 0  | 0  | 0  | 0  | 0  | 0         | 0  | 0  | 0  | 0  | 0  | 0  | 1  | 0  | 0  | 0  | 0  | 0  | 0  | 0  | 0  | 0 | 0 | 0 | 0 |
| IP100005605       | Isoform 1 of Protein NDRG3                          | S 320  | 100% (1,000.00)          | 1.0000                                | +         | 2  | 0       | 0         | 0  | 0  | 0  | 0  | 0  | 1  | 0  | 0  | 0  | 0  | 0  | 0  | 0  | 0  | 0  | 0  | 1         | 0  | 0  | 0  | 0  | 0  | 0  | 0  | 0  | 0  | 0  | 0  | 0  | 0  | 0  | 0  | 0 | 0 | 0 | 0 |
| IP100005614       | Isoform Long of Spectrin beta chain, brain 1        | S 2138 | 100% (44.78)             | 1.0000                                | +         | 5  | +       | 6         | 2  | 0  | 0  | 0  | 0  | 0  | 0  | 1  | 0  | 0  | 0  |    |    |    |    |    |           |    |    |    |    |    |    |    |    |    |    |    |    |    |    |    |   |   |   |   |

Supplemental Table 3. A list of phosphorylation sites and their counts in SNU216 and SNU216-LR.

| Protein accession | Protein name                                                      | Site   | Best Ascore <sup>1</sup> | Localization Probability <sup>2</sup> | Total No. |      | SNU216  |           |      |      |      |      |      |      |      |      |      |      |      |      |      |      |      |      | SNU216-LR |      |      |      |      |      |      |      |      |      |      |      |      |      |      |      |      |      |      |
|-------------------|-------------------------------------------------------------------|--------|--------------------------|---------------------------------------|-----------|------|---------|-----------|------|------|------|------|------|------|------|------|------|------|------|------|------|------|------|------|-----------|------|------|------|------|------|------|------|------|------|------|------|------|------|------|------|------|------|------|
|                   |                                                                   |        |                          |                                       |           |      | SNU 216 | SNU 216LR | 1_01 | 2_01 | 3_01 | 4_01 | 5_01 | 6_01 | 1_02 | 2_02 | 3_02 | 4_02 | 5_02 | 6_02 | 1_03 | 2_03 | 3_03 | 4_03 | 5_03      | 6_03 | 1_01 | 2_01 | 3_01 | 4_01 | 5_01 | 6_01 | 1_02 | 2_02 | 3_02 | 4_02 | 5_02 | 6_02 | 1_03 | 2_03 | 3_03 | 4_03 | 5_03 |
| IPI00009032       | Lupus La protein                                                  | S 366  | 100% (101.71)            | 1.0000                                | ■113      | ■108 | 2       | 3         | 9    | 21   | 2    | 0    | 2    | 3    | 10   | 17   | 2    | 1    | 3    | 3    | 15   | 18   | 2    | 0    | 1         | 3    | 12   | 17   | 2    | 0    | 1    | 2    | 10   | 19   | 1    | 0    | 1    | 2    | 12   | 19   | 1    | 0    |      |
| IPI00009286       | Isoform 1 of Zinc finger protein HRX                              | S 1583 | 100% (1,000.00)          | 1.0000                                | ■2        | 0    | 0       | 0         | 0    | 0    | 1    | 0    | 0    | 0    | 0    | 0    | 1    | 0    | 0    | 0    | 0    | 0    | 0    | 0    | 0         | 0    | 0    | 0    | 0    | 0    | 0    | 0    | 0    | 0    | 0    | 0    | 0    | 0    | 0    | 0    | 0    | 0    |      |
| IPI00009286       | Isoform 1 of Zinc finger protein HRX                              | S 1679 | 100% (1,000.00)          | 1.0000                                | 0         | ■1   | 0       | 0         | 0    | 0    | 0    | 0    | 0    | 0    | 0    | 0    | 0    | 0    | 0    | 0    | 0    | 0    | 0    | 0    | 0         | 0    | 0    | 0    | 0    | 1    | 0    | 0    | 0    | 0    | 0    | 0    | 0    | 0    | 0    | 0    | 0    | 0    |      |
| IPI00009326       | 65 kDa Yes-associated protein                                     | S 251  | 100% (101.40)            | 1.0000                                | ■2        | ■3   | 0       | 0         | 1    | 0    | 0    | 0    | 0    | 0    | 1    | 0    | 0    | 0    | 0    | 0    | 0    | 0    | 0    | 0    | 0         | 0    | 0    | 0    | 0    | 0    | 1    | 0    | 0    | 0    | 0    | 0    | 0    | 0    | 0    | 0    | 1    | 0    | 0    |
| IPI00009505       | Isoform 1 of Beta-2-syntrophin                                    | S 95   | 100% (1,000.00)          | 1.0000                                | ■3        | ■2   | 2       | 0         | 0    | 1    | 0    | 0    | 0    | 0    | 0    | 1    | 0    | 0    | 0    | 0    | 0    | 0    | 0    | 1    | 0         | 0    | 0    | 0    | 2    | 0    | 0    | 0    | 0    | 0    | 0    | 0    | 0    | 0    | 0    | 0    | 0    | 0    | 0    |
| IPI00009505       | Isoform 1 of Beta-2-syntrophin                                    | S 110  | 100% (1,000.00)          | 1.0000                                | ■7        | ■2   | 0       | 0         | 2    | 0    | 0    | 0    | 0    | 0    | 2    | 0    | 0    | 0    | 0    | 0    | 0    | 0    | 3    | 0    | 0         | 0    | 0    | 0    | 0    | 0    | 0    | 0    | 0    | 0    | 1    | 0    | 0    | 0    | 0    | 0    | 1    | 0    | 0    |
| IPI00009772       | BET1-like protein                                                 | S 9    | 100% (1,000.00)          | 1.0000                                | ■9        | ■7   | 0       | 0         | 0    | 0    | 1    | 2    | 0    | 0    | 0    | 0    | 1    | 2    | 0    | 0    | 0    | 0    | 0    | 0    | 0         | 0    | 1    | 2    | 0    | 0    | 1    | 2    | 0    | 0    | 0    | 0    | 1    | 1    | 0    | 0    | 0    | 1    | 1    |
| IPI00009790       | 6-phosphofructokinase type C                                      | S 386  | 100% (109.53)            | 1.0000                                | ■16       | ■16  | 0       | 2         | 2    | 0    | 0    | 0    | 1    | 3    | 4    | 0    | 0    | 0    | 0    | 0    | 1    | 3    | 0    | 0    | 0         | 0    | 3    | 4    | 0    | 0    | 0    | 0    | 0    | 4    | 1    | 0    | 0    | 0    | 0    | 3    | 1    | 0    | 0    |
| IPI00009866       | Isoform 1 of Keratin, type I cytoskeletal 13                      | S 440  | 100% (1,000.00)          | 1.0000                                | 0         | ■1   | 0       | 0         | 0    | 0    | 0    | 0    | 0    | 0    | 0    | 0    | 0    | 0    | 0    | 0    | 0    | 0    | 0    | 0    | 0         | 0    | 0    | 0    | 0    | 1    | 0    | 0    | 0    | 0    | 0    | 0    | 0    | 0    | 0    | 0    | 0    | 0    |      |
| IPI00009917       | Isoform 3 of LAS1-like protein                                    | S 501  | 100% (1,000.00)          | 1.0000                                | ■2        | ■4   | 0       | 1         | 0    | 0    | 0    | 0    | 0    | 0    | 1    | 0    | 0    | 0    | 0    | 0    | 0    | 0    | 0    | 0    | 0         | 0    | 1    | 0    | 0    | 0    | 0    | 0    | 0    | 2    | 0    | 0    | 0    | 0    | 0    | 1    | 0    | 0    |      |
| IPI00010080       | Serine/threonine-protein kinase OSR1                              | S 339  | 100% (79.03)             | 1.0000                                | ■24       | ■12  | 1       | 1         | 4    | 2    | 0    | 0    | 2    | 2    | 5    | 0    | 0    | 0    | 1    | 0    | 4    | 2    | 0    | 0    | 1         | 1    | 3    | 1    | 0    | 0    | 1    | 1    | 2    | 1    | 0    | 0    | 0    | 0    | 0    | 1    | 0    | 0    |      |
| IPI00010088       | Histone deacetylase 4                                             | S 565  | 100% (1,000.00)          | 1.0000                                | ■1        | ■1   | 0       | 1         | 0    | 0    | 0    | 0    | 0    | 0    | 0    | 0    | 0    | 0    | 0    | 0    | 0    | 0    | 0    | 0    | 0         | 1    | 0    | 0    | 0    | 0    | 0    | 0    | 0    | 0    | 0    | 0    | 0    | 0    | 0    | 0    | 0    | 0    |      |
| IPI00010241       | WW domain-containing adapter with a coiled-coil region, isoform 1 | S 53   | 100% (1,000.00)          | 1.0000                                | 0         | ■2   | 0       | 0         | 0    | 0    | 0    | 0    | 0    | 0    | 0    | 0    | 0    | 0    | 0    | 0    | 0    | 0    | 0    | 0    | 0         | 1    | 0    | 0    | 0    | 0    | 0    | 0    | 0    | 0    | 1    | 0    | 0    | 0    | 0    | 0    | 0    | 0    |      |
| IPI00010252       | Isoform Alpha of Transcription intermediary factor 1-gamma        | S 753  | 100% (1,000.00)          | 1.0000                                | ■1        | 0    | 0       | 0         | 0    | 0    | 1    | 0    | 0    | 0    | 0    | 0    | 0    | 0    | 0    | 0    | 0    | 0    | 0    | 0    | 0         | 0    | 0    | 0    | 0    | 0    | 0    | 0    | 0    | 0    | 0    | 0    | 0    | 0    | 0    | 0    | 0    | 0    |      |
| IPI00010252       | Isoform Alpha of Transcription intermediary factor 1-gamma        | S 756  | 100% (1,000.00)          | 1.0000                                | ■1        | 0    | 0       | 0         | 0    | 0    | 1    | 0    | 0    | 0    | 0    | 0    | 0    | 0    | 0    | 0    | 0    | 0    | 0    | 0    | 0         | 0    | 0    | 0    | 0    | 0    | 0    | 0    | 0    | 0    | 0    | 0    | 0    | 0    | 0    | 0    | 0    | 0    |      |
| IPI00010252       | Isoform Alpha of Transcription intermediary factor 1-gamma        | S 757  | 100% (1,000.00)          | 1.0000                                | ■1        | 0    | 0       | 0         | 0    | 1    | 0    | 0    | 0    | 0    | 0    | 0    | 0    | 0    | 0    | 0    | 0    | 0    | 0    | 0    | 0         | 0    | 0    | 0    | 0    | 0    | 0    | 0    | 0    | 0    | 0    | 0    | 0    | 0    | 0    | 0    | 0    | 0    |      |
| IPI00010338       | Tissue factor precursor                                           | S 295  | 100% (81.60)             | 1.0000                                | ■3        | ■6   | 0       | 1         | 0    | 0    | 0    | 0    | 0    | 0    | 1    | 0    | 0    | 0    | 0    | 0    | 0    | 0    | 1    | 0    | 0         | 0    | 0    | 0    | 0    | 2    | 0    | 0    | 0    | 0    | 1    | 2    | 0    | 0    | 0    | 0    | 0    | 1    | 0    |
| IPI00010400       | 1-phosphatidylinositol-4,5-bisphosphate phosphodiesterase beta 3  | S 537  | 100% (1,000.00)          | 1.0000                                | 0         | ■2   | 0       | 0         | 0    | 0    | 0    | 0    | 0    | 0    | 0    | 0    | 0    | 0    | 0    | 0    | 0    | 0    | 0    | 0    | 0         | 1    | 1    | 0    | 0    | 0    | 0    | 0    | 0    | 0    | 0    | 0    | 0    | 0    | 0    | 0    | 0    | 0    |      |
| IPI00010414       | PDZ and LIM domain protein 1                                      | S 89   | 100% (87.62)             | 1.0000                                | ■15       | ■23  | 0       | 0         | 0    | 4    | 1    | 0    | 0    | 0    | 0    | 5    | 2    | 0    | 0    | 0    | 0    | 3    | 0    | 0    | 0         | 1    | 3    | 2    | 0    | 0    | 0    | 2    | 5    | 2    | 0    | 0    | 0    | 0    | 1    | 6    | 1    | 0    |      |
| IPI00010471       | Plastin-2                                                         | S 256  | 100% (1,000.00)          | 1.0000                                | 0         | ■4   | 0       | 0         | 0    | 0    | 0    | 0    | 0    | 0    | 0    | 0    | 0    | 0    | 0    | 0    | 0    | 0    | 0    | 0    | 0         | 0    | 0    | 0    | 0    | 0    | 0    | 0    | 0    | 1    | 1    | 0    | 0    | 0    | 0    | 1    | 1    | 0    |      |
| IPI00010486       | Isoform 1 of Hermansky-Pudlak syndrome 5 protein                  | S 695  | 100% (56.04)             | 1.0000                                | ■4        | ■2   | 1       | 0         | 0    | 0    | 0    | 0    | 1    | 0    | 0    | 0    | 0    | 0    | 2    | 0    | 0    | 0    | 0    | 0    | 0         | 0    | 0    | 0    | 0    | 0    | 0    | 0    | 0    | 1    | 0    | 0    | 0    | 0    | 1    | 0    | 0    | 0    |      |
| IPI00010544       | Isoform 1 of Tight junction-associated protein 1                  | S 300  | 100% (1,000.00)          | 1.0000                                | ■9        | ■7   | 0       | 1         | 1    | 1    | 0    | 0    | 1    | 1    | 1    | 1    | 0    | 0    | 1    | 1    | 0    | 0    | 0    | 0    | 0         | 1    | 1    | 1    | 0    | 0    | 0    | 1    | 1    |      |      |      |      |      |      |      |      |      |      |

Supplemental Table 3. A list of phosphorylation sites and their counts in SNU216 and SNU216-LR.

| Protein accession | Protein name               | Site  | Best Ascore <sup>1</sup> | Localization Probability <sup>2</sup> | Total No.                                                                                                                                                                                                                                                                                                                                                                                                                                                                                                                                                                                                                                                                                                                                                                                                                                                                                                                                                                                                                                                                                                                                                                                                                                                                                                                                                                                                                                                                                                                                                                                                                                                                                                                                                                                                                                                                                                                                                                                                                                                                                                                                                                                                                                                                                                                                                                                                                                                                                                                                                                                                                                                                                                                                                                                                                                                                                                                                                                                                                                                                                                                                                                                                                                                                                                                                                                                                                                                                                                                                                                                                                                                                                                                                                                                                                                                                                                                                                                                                                                                                                                                                                                                                                                                                                                                                                                                                                                                                                                                                                                                                                                                                                                                                                                                                                                                                                                                                                                                                                                                                                                                                                                                                                                                                                                                                                                                                                                                                                                                                                                                                                                                                                                                                                                                                                                                                                                                                                                                                                                                                                                                                                                                                                                                                                                                                                                                                                                                                                                                                                                                                                                                                                                                                                                                                                                                                                                                                                                                                                                                                                                                                                                                                                                                                                                                                                                                                                                                                                                                                                                                                                                                                                                                                                                                                                                                                                                                                                                                                                                                                                                                                                                                                                                                                                                                                                                                                                                                                                                                                                                                                                                                                                                                                                                                                                                                                                                                                                                                                                                                                                                                                                                                                                                                                                                                                                                                                                                                                                                                                                                                                                                                                                                                                                                                                                                                                                                                                                                                                                                                                                                                                                                                                                                                                                                                                                                                                                                                                                                                                                                                                                                                                                                                                                                                                                                                                                                                                                                                                                                                                                                                                                                                                                                                                                                                                                                                                                                                                                                                                                                                                                                                                                                                                                                                                                                           |           | SNU216 |      |      |      |      |      |      |      |      |      |      |      |      |      |      |      | SNU216-LR |      |      |      |      |      |      |      |      |      |      |      |      |      |      |      |
|-------------------|----------------------------|-------|--------------------------|---------------------------------------|-----------------------------------------------------------------------------------------------------------------------------------------------------------------------------------------------------------------------------------------------------------------------------------------------------------------------------------------------------------------------------------------------------------------------------------------------------------------------------------------------------------------------------------------------------------------------------------------------------------------------------------------------------------------------------------------------------------------------------------------------------------------------------------------------------------------------------------------------------------------------------------------------------------------------------------------------------------------------------------------------------------------------------------------------------------------------------------------------------------------------------------------------------------------------------------------------------------------------------------------------------------------------------------------------------------------------------------------------------------------------------------------------------------------------------------------------------------------------------------------------------------------------------------------------------------------------------------------------------------------------------------------------------------------------------------------------------------------------------------------------------------------------------------------------------------------------------------------------------------------------------------------------------------------------------------------------------------------------------------------------------------------------------------------------------------------------------------------------------------------------------------------------------------------------------------------------------------------------------------------------------------------------------------------------------------------------------------------------------------------------------------------------------------------------------------------------------------------------------------------------------------------------------------------------------------------------------------------------------------------------------------------------------------------------------------------------------------------------------------------------------------------------------------------------------------------------------------------------------------------------------------------------------------------------------------------------------------------------------------------------------------------------------------------------------------------------------------------------------------------------------------------------------------------------------------------------------------------------------------------------------------------------------------------------------------------------------------------------------------------------------------------------------------------------------------------------------------------------------------------------------------------------------------------------------------------------------------------------------------------------------------------------------------------------------------------------------------------------------------------------------------------------------------------------------------------------------------------------------------------------------------------------------------------------------------------------------------------------------------------------------------------------------------------------------------------------------------------------------------------------------------------------------------------------------------------------------------------------------------------------------------------------------------------------------------------------------------------------------------------------------------------------------------------------------------------------------------------------------------------------------------------------------------------------------------------------------------------------------------------------------------------------------------------------------------------------------------------------------------------------------------------------------------------------------------------------------------------------------------------------------------------------------------------------------------------------------------------------------------------------------------------------------------------------------------------------------------------------------------------------------------------------------------------------------------------------------------------------------------------------------------------------------------------------------------------------------------------------------------------------------------------------------------------------------------------------------------------------------------------------------------------------------------------------------------------------------------------------------------------------------------------------------------------------------------------------------------------------------------------------------------------------------------------------------------------------------------------------------------------------------------------------------------------------------------------------------------------------------------------------------------------------------------------------------------------------------------------------------------------------------------------------------------------------------------------------------------------------------------------------------------------------------------------------------------------------------------------------------------------------------------------------------------------------------------------------------------------------------------------------------------------------------------------------------------------------------------------------------------------------------------------------------------------------------------------------------------------------------------------------------------------------------------------------------------------------------------------------------------------------------------------------------------------------------------------------------------------------------------------------------------------------------------------------------------------------------------------------------------------------------------------------------------------------------------------------------------------------------------------------------------------------------------------------------------------------------------------------------------------------------------------------------------------------------------------------------------------------------------------------------------------------------------------------------------------------------------------------------------------------------------------------------------------------------------------------------------------------------------------------------------------------------------------------------------------------------------------------------------------------------------------------------------------------------------------------------------------------------------------------------------------------------------------------------------------------------------------------------------------------------------------------------------------------------------------------------------------------------------------------------------------------------------------------------------------------------------------------------------------------------------------------------------------------------------------------------------------------------------------------------------------------------------------------------------------------------------------------------------------------------------------------------------------------------------------------------------------------------------------------------------------------------------------------------------------------------------------------------------------------------------------------------------------------------------------------------------------------------------------------------------------------------------------------------------------------------------------------------------------------------------------------------------------------------------------------------------------------------------------------------------------------------------------------------------------------------------------------------------------------------------------------------------------------------------------------------------------------------------------------------------------------------------------------------------------------------------------------------------------------------------------------------------------------------------------------------------------------------------------------------------------------------------------------------------------------------------------------------------------------------------------------------------------------------------------------------------------------------------------------------------------------------------------------------------------------------------------------------------------------------------------------------------------------------------------------------------------------------------------------------------------------------------------------------------------------------------------------------------------------------------------------------------------------------------------------------------------------------------------------------------------------------------------------------------------------------------------------------------------------------------------------------------------------------------------------------------------------------------------------------------------------------------------------------------------------------------------------------------------------------------------------------------------------------------------------------------------------------------------------------------------------------------------------------------------------------------------------------------------------------------------------------------------------------------------------------------------------------------------------------------------------------------------------------------------------------------------------------------------------------------------------------------------------------------------------------------------------------------------------------------------------------------------------------------------------------------------------------------------------------------------------------------------------------------------------------------------------------------------------------------------------------------------------------------------------------------------------------|-----------|--------|------|------|------|------|------|------|------|------|------|------|------|------|------|------|------|-----------|------|------|------|------|------|------|------|------|------|------|------|------|------|------|------|
|                   |                            |       |                          |                                       | SNU 216                                                                                                                                                                                                                                                                                                                                                                                                                                                                                                                                                                                                                                                                                                                                                                                                                                                                                                                                                                                                                                                                                                                                                                                                                                                                                                                                                                                                                                                                                                                                                                                                                                                                                                                                                                                                                                                                                                                                                                                                                                                                                                                                                                                                                                                                                                                                                                                                                                                                                                                                                                                                                                                                                                                                                                                                                                                                                                                                                                                                                                                                                                                                                                                                                                                                                                                                                                                                                                                                                                                                                                                                                                                                                                                                                                                                                                                                                                                                                                                                                                                                                                                                                                                                                                                                                                                                                                                                                                                                                                                                                                                                                                                                                                                                                                                                                                                                                                                                                                                                                                                                                                                                                                                                                                                                                                                                                                                                                                                                                                                                                                                                                                                                                                                                                                                                                                                                                                                                                                                                                                                                                                                                                                                                                                                                                                                                                                                                                                                                                                                                                                                                                                                                                                                                                                                                                                                                                                                                                                                                                                                                                                                                                                                                                                                                                                                                                                                                                                                                                                                                                                                                                                                                                                                                                                                                                                                                                                                                                                                                                                                                                                                                                                                                                                                                                                                                                                                                                                                                                                                                                                                                                                                                                                                                                                                                                                                                                                                                                                                                                                                                                                                                                                                                                                                                                                                                                                                                                                                                                                                                                                                                                                                                                                                                                                                                                                                                                                                                                                                                                                                                                                                                                                                                                                                                                                                                                                                                                                                                                                                                                                                                                                                                                                                                                                                                                                                                                                                                                                                                                                                                                                                                                                                                                                                                                                                                                                                                                                                                                                                                                                                                                                                                                                                                                                                                                                             | SNU 216LR | 1_01   | 2_01 | 3_01 | 4_01 | 5_01 | 6_01 | 1_02 | 2_02 | 3_02 | 4_02 | 5_02 | 6_02 | 1_03 | 2_03 | 3_03 | 4_03 | 5_03      | 6_03 | 1_01 | 2_01 | 3_01 | 4_01 | 5_01 | 6_01 | 1_02 | 2_02 | 3_02 | 4_02 | 5_02 | 6_02 | 1_03 | 2_03 |
| IPI00013743       | Hypothetical protein BUD13 | S 271 | 100% (109.41)            | 1.0000                                | <div><div></div><div></div><div></div><div></div><div></div><div></div><div></div><div></div><div></div><div></div><div></div><div></div><div></div><div></div><div></div><div></div><div></div><div></div><div></div><div></div><div></div><div></div><div></div><div></div><div></div><div></div><div></div><div></div><div></div><div></div><div></div><div></div><div></div><div></div><div></div><div></div><div></div><div></div><div></div><div></div><div></div><div></div><div></div><div></div><div></div><div></div><div></div><div></div><div></div><div></div><div></div><div></div><div></div><div></div><div></div><div></div><div></div><div></div><div></div><div></div><div></div><div></div><div></div><div></div><div></div><div></div><div></div><div></div><div></div><div></div><div></div><div></div><div></div><div></div><div></div><div></div><div></div><div></div><div></div><div></div><div></div><div></div><div></div><div></div><div></div><div></div><div></div><div></div><div></div><div></div><div></div><div></div><div></div><div></div><div></div><div></div><div></div><div></div><div></div><div></div><div></div><div></div><div></div><div></div><div></div><div></div><div></div><div></div><div></div><div></div><div></div><div></div><div></div><div></div><div></div><div></div><div></div><div></div><div></div><div></div><div></div><div></div><div></div><div></div><div></div><div></div><div></div><div></div><div></div><div></div><div></div><div></div><div></div><div></div><div></div><div></div><div></div><div></div><div></div><div></div><div></div><div></div><div></div><div></div><div></div><div></div><div></div><div></div><div></div><div></div><div></div><div></div><div></div><div></div><div></div><div></div><div></div><div></div><div></div><div></div><div></div><div></div><div></div><div></div><div></div><div></div><div></div><div></div><div></div><div></div><div></div><div></div><div></div><div></div><div></div><div></div><div></div><div></div><div></div><div></div><div></div><div></div><div></div><div></div><div></div><div></div><div></div><div></div><div></div><div></div><div></div><div></div><div></div><div></div><div></div><div></div><div></div><div></div><div></div><div></div><div></div><div></div><div></div><div></div><div></div><div></div><div></div><div></div><div></div><div></div><div></div><div></div><div></div><div></div><div></div><div></div><div></div><div></div><div></div><div></div><div></div><div></div><div></div><div></div><div></div><div></div><div></div><div></div><div></div><div></div><div></div><div></div><div></div><div></div><div></div><div></div><div></div><div></div><div></div><div></div><div></div><div></div><div></div><div></div><div></div><div></div><div></div><div></div><div></div><div></div><div></div><div></div><div></div><div></div><div></div><div></div><div></div><div></div><div></div><div></div><div></div><div></div><div></div><div></div><div></div><div></div><div></div><div></div><div></div><div></div><div></div><div></div><div></div><div></div><div></div><div></div><div></div><div></div><div></div><div></div><div></div><div></div><div></div><div></div><div></div><div></div><div></div><div></div><div></div><div></div><div></div><div></div><div></div><div></div><div></div><div></div><div></div><div></div><div></div><div></div><div></div><div></div><div></div><div></div><div></div><div></div><div></div><div></div><div></div><div></div><div></div><div></div><div></div><div></div><div></div><div></div><div></div><div></div><div></div><div></div><div></div><div></div><div></div><div></div><div></div><div></div><div></div><div></div><div></div><div></div><div></div><div></div><div></div><div></div><div></div><div></div><div></div><div></div><div></div><div></div><div></div><div></div><div></div><div></div><div></div><div></div><div></div><div></div><div></div><div></div><div></div><div></div><div></div><div></div><div></div><div></div><div></div><div></div><div></div><div></div><div></div><div></div><div></div><div></div><div></div><div></div><div></div><div></div><div></div><div></div><div></div><div></div><div></div><div></div><div></div><div></div><div></div><div></div><div></div><div></div><div></div><div></div><div></div><div></div><div></div><div></div><div></div><div></div><div></div><div></div><div></div><div></div><div></div><div></div><div></div><div></div><div></div><div></div><div></div><div></div><div></div><div></div><div></div><div></div><div></div><div></div><div></div><div></div><div></div><div></div><div></div><div></div><div></div><div></div><div></div><div></div><div></div><div></div><div></div><div></div><div></div><div></div><div></div><div></div><div></div><div></div><div></div><div></div><div></div><div></div><div></div><div></div><div></div><div></div><div></div><div></div><div></div><div></div><div></div><div></div><div></div><div></div><div></div><div></div><div></div><div></div><div></div><div></div><div></div><div></div><div></div><div></div><div></div><div></div><div></div><div></div><div></div><div></div><div></div><div></div><div></div><div></div><div></div><div></div><div></div><div></div><div></div><div></div><div></div><div></div><div></div><div></div><div></div><div></div><div></div><div></div><div></div><div></div><div></div><div></div><div></div><div></div><div></div><div></div><div></div><div></div><div></div><div></div><div></div><div></div><div></div><div></div><div></div><div></div><div></div><div></div><div></div><div></div><div></div><div></div><div></div><div></div><div></div><div></div><div></div><div></div><div></div><div></div><div></div><div></div><div></div><div></div><div></div><div></div><div></div><div></div><div></div><div></div><div></div><div></div><div></div><div></div><div></div><div></div><div></div><div></div><div></div><div></div><div></div><div></div><div></div><div></div><div></div><div></div><div></div><div></div><div></div><div></div><div></div><div></div><div></div><div></div><div></div><div></div><div></div><div></div><div></div><div></div><div></div><div></div><div></div><div></div><div></div><div></div><div></div><div></div><div></div><div></div><div></div><div></div><div></div><div></div><div></div><div></div><div></div><div></div><div></div><div></div><div></div><div></div><div></div><div></div><div></div><div></div><div></div><div></div><div></div><div></div><div></div><div></div><div></div><div></div><div></div><div></div><div></div><div></div><div></div><div></div><div></div><div></div><div></div><div></div><div></div><div></div><div></div><div></div><div></div><div></div><div></div><div></div><div></div><div></div><div></div><div></div><div></div><div></div><div></div><div></div><div></div><div></div><div></div><div></div><div></div><div></div><div></div><div></div><div></div><div></div><div></div><div></div><div></div><div></div><div></div><div></div><div></div><div></div><div></div><div></div><div></div><div></div><div></div><div></div><div></div><div></div><div></div><div></div><div></div><div></div><div></div><div></div><div></div><div></div><div></div><div></div><div></div><div></div><div></div><div></div><div></div><div></div><div></div><div></div><div></div><div></div><div></div><div></div><div></div><div></div><div></div><div></div><div></div><div></div><div></div><div></div><div></div><div></div><div></div><div></div><div></div><div></div><div></div><div></div><div></div><div></div><div></div><div></div><div></div><div></div><div></div><div></div><div></div><div></div><div></div><div></div><div></div><div></div><div></div><div></div><div></div><div></div><div></div><div></div><div></div><div></div><div></div><div></div><div></div><div></div><div></div><div></div><div></div><div></div><div></div><div></div><div></div><div></div><div></div><div></div><div></div><div></div><div></div><div></div><div></div><div></div><div></div><div></div><div></div><div></div><div></div><div></div><div></div><div></div><div></div><div></div><div></div><div></div><div></div><div></div><div></div><div></div><div></div><div></div><div></div><div></div><div></div><div></div><div></div><div></div><div></div><div></div><div></div><div></div><div></div><div></div><div></div><div></div><div></div><div></div><div></div><div></div><div></div><div></div><div></div><div></div><div></div><div></div><div></div><div></div><div></div><div></div><div></div><div></div><div></div><div></div><div></div><div></div><div></div><div></div><div></div><div></div><div></div><div></div><div></div><div></div><div></div><div></div><div></div><div></div><div></div><div></div><div></div><div></div><div></div><div></div><div></div><div></div><div></div><div></div><div></div><div></div><div></div><div></div><div></div><div></div><div></div><div></div><div></div><div></div><div></div><div></div><div></div><div></div><div></div><div></div><div></div><div></div><div></div><div></div><div></div><div></div><div></div><div></div><div></div><div></div><div></div><div></div><div></div><div></div><div></div><div></div><div></div><div></div><div></div><div></div><div></div><div></div><div></div><div></div><div></div><div></div><div></div><div></div><div></div><div></div><div></div><div></div><div></div><div></div><div></div><div></div><div></div><div></div><div></div><div></div><div></div><div></div><div></div><div></div><div></div><div></div><div></div><div></div><div></div><div></div><div></div><div></div><div></div><div></div><div></div><div></div><div></div><div></div><div></div><div></div><div></div><div></div><div></div><div></div><div></div><div></div><div></div><div></div><div></div><div></div><div></div><div></div><div></div><div></div><div></div><div></div><div></div><div></div><div></div><div></div><div></div><div></div><div></div><div></div><div></div><div></div><div></div><div></div><div></div><div></div><div></div><div></div><div></div><div></div><div></div><div></div><div></div><div></div><div></div><div></div><div></div><div></div><div></div><div></div><div></div><div></div><div></div><div></div><div></div><div></div><div></div><div></div><div></div><div></div><div></div><div></div><div></div><div></div><div></div><div></div><div></div><div></div><div></div><div></div><div></div><div></div><div></div><div></div><div></div><div></div><div></div><div></div><div></div><div></div><div></div><div></div><div></div><div></div><div></div><div></div><div></div><div></div><div></div><div></div><div></div><div></div><div></div><div></div><div></div><div></div><div></div><div></div><div></div><div></div><div></div><div></div><div></div><div></div><div></div><div></div><div></div><div></div><div></div><div></div><div></div><div></div><div></div><div></div><div></div><div></div><div></div><div></div><div></div><div></div><div></div><div></div><div></div><div></div><div></div><div></div><div></div><div></div><div></div><div></div><div></div><div></div><div></div><div></div><div></div><div></div><div></div><div></div><div></div><div></div><div></div><div></div><div></div><div></div><div></div><div></div><div></div><div></div><div></div><div></div><div></div><div></div><div></div><div></div><div></div><div></div><div></div><div></div><div></div><div></div><div></div><div></div><div></div><div></div><div></div><div></div><div></div><div></div><div></div><div></div><div></div><div></div><div></div><div></div><div>&lt;/</div></div> |           |        |      |      |      |      |      |      |      |      |      |      |      |      |      |      |      |           |      |      |      |      |      |      |      |      |      |      |      |      |      |      |      |

Supplemental Table 3. A list of phosphorylation sites and their counts in SNU216 and SNU216-LR.

| Protein accession | Protein name                                          | Site   | Best Ascore <sup>1</sup> | Localization Probability <sup>2</sup> | Total No. |    | SNU216  |           |      |      |      |      |      |      |      |      |      |      |      |      |      |      |      |      | SNU216-LR |      |      |      |      |      |      |      |      |      |      |      |      |      |      |      |      |      |      |      |   |   |   |   |   |   |
|-------------------|-------------------------------------------------------|--------|--------------------------|---------------------------------------|-----------|----|---------|-----------|------|------|------|------|------|------|------|------|------|------|------|------|------|------|------|------|-----------|------|------|------|------|------|------|------|------|------|------|------|------|------|------|------|------|------|------|------|---|---|---|---|---|---|
|                   |                                                       |        |                          |                                       |           |    | SNU 216 | SNU 216LR | 1_01 | 2_01 | 3_01 | 4_01 | 5_01 | 6_01 | 1_02 | 2_02 | 3_02 | 4_02 | 5_02 | 6_02 | 1_03 | 2_03 | 3_03 | 4_03 | 5_03      | 6_03 | 1_01 | 2_01 | 3_01 | 4_01 | 5_01 | 6_01 | 1_02 | 2_02 | 3_02 | 4_02 | 5_02 | 6_02 | 1_03 | 2_03 | 3_03 | 4_03 | 5_03 | 6_03 |   |   |   |   |   |   |
| IPI00019502       | Myosin-9                                              | S 1511 | 100% (49.35)             | 1.0000                                | 3         | 3  | 0       | 0         | 0    | 1    | 0    | 0    | 0    | 0    | 0    | 0    | 1    | 0    | 0    | 0    | 0    | 0    | 0    | 1    | 0         | 0    | 0    | 0    | 0    | 0    | 1    | 0    | 0    | 0    | 0    | 0    | 0    | 0    | 0    | 0    | 0    | 0    | 1    | 0    | 0 | 0 | 0 | 1 | 0 | 0 |
| IPI00019502       | Myosin-9                                              | S 1942 | 100% (1,000.00)          | 1.0000                                | 42        | 27 | 9       | 4         | 1    | 0    | 0    | 0    | 14   | 4    | 0    | 0    | 0    | 0    | 0    | 0    | 8    | 1    | 1    | 0    | 0         | 0    | 8    | 1    | 1    | 0    | 0    | 0    | 0    | 8    | 0    | 0    | 0    | 0    | 1    | 8    | 0    | 0    | 0    | 0    | 0 | 0 | 0 |   |   |   |
| IPI00019540       | Isoform 4 of SAPS domain family member 3              | S 537  | 100% (1,000.00)          | 1.0000                                | 10        | 10 | 1       | 2         | 1    | 0    | 0    | 0    | 1    | 1    | 1    | 0    | 0    | 0    | 0    | 0    | 1    | 2    | 0    | 0    | 0         | 0    | 1    | 2    | 1    | 0    | 0    | 0    | 0    | 1    | 1    | 0    | 0    | 0    | 0    | 1    | 1    | 1    | 0    | 0    | 0 | 0 | 0 |   |   |   |
| IPI00019906       | Isoform 2 of Basigin precursor                        | S 246  | 100% (1,000.00)          | 1.0000                                | 11        | 12 | 0       | 0         | 2    | 1    | 0    | 0    | 0    | 0    | 2    | 2    | 0    | 0    | 0    | 0    | 0    | 0    | 3    | 1    | 0         | 0    | 0    | 0    | 4    | 1    | 0    | 0    | 0    | 0    | 2    | 1    | 0    | 0    | 0    | 0    | 0    | 3    | 1    | 0    | 0 | 0 | 0 |   |   |   |
| IPI00019996       | modulator of estrogen induced transcription isoform b | S 271  | 100% (1,000.00)          | 1.0000                                | 27        | 38 | 2       | 4         | 1    | 2    | 0    | 0    | 3    | 3    | 1    | 1    | 0    | 0    | 4    | 5    | 0    | 4    | 5    | 0    | 1         | 0    | 0    | 5    | 5    | 1    | 1    | 0    | 0    | 4    | 4    | 1    | 2    | 1    | 0    | 5    | 6    | 2    | 1    | 0    | 0 | 0 |   |   |   |   |
| IPI00019996       | modulator of estrogen induced transcription isoform b | S 535  | 100% (92.63)             | 1.0000                                | 35        | 37 | 7       | 6         | 1    | 0    | 0    | 0    | 4    | 6    | 1    | 0    | 0    | 0    | 6    | 3    | 1    | 0    | 0    | 0    | 0         | 5    | 4    | 1    | 0    | 0    | 0    | 6    | 6    | 0    | 0    | 0    | 0    | 7    | 7    | 1    | 0    | 0    | 0    | 0    | 0 |   |   |   |   |   |
| IPI00020021       | Protein DEK                                           | S 32   | 100% (1,000.00)          | 1.0000                                | 26        | 35 | 0       | 0         | 0    | 3    | 3    | 2    | 0    | 1    | 0    | 2    | 4    | 2    | 0    | 1    | 0    | 2    | 4    | 2    | 0         | 1    | 0    | 5    | 5    | 2    | 2    | 1    | 0    | 5    | 4    | 2    | 0    | 0    | 0    | 3    | 3    | 2    | 0    | 0    | 0 | 0 |   |   |   |   |
| IPI00020021       | Protein DEK                                           | S 51   | 100% (1,000.00)          | 1.0000                                | 1         | 2  | 0       | 0         | 0    | 0    | 0    | 0    | 0    | 0    | 0    | 0    | 1    | 0    | 0    | 0    | 0    | 0    | 0    | 0    | 0         | 0    | 0    | 0    | 0    | 0    | 0    | 0    | 0    | 0    | 0    | 0    | 0    | 0    | 0    | 0    | 0    | 0    | 0    | 0    | 0 | 0 |   |   |   |   |
| IPI00020021       | Protein DEK                                           | S 243  | 100% (1,000.00)          | 1.0000                                | 4         | 10 | 0       | 0         | 0    | 2    | 0    | 0    | 0    | 0    | 0    | 1    | 0    | 0    | 0    | 0    | 0    | 0    | 0    | 1    | 0         | 0    | 0    | 0    | 2    | 4    | 0    | 0    | 0    | 0    | 0    | 1    | 0    | 0    | 0    | 0    | 0    | 1    | 2    | 0    | 0 | 0 |   |   |   |   |
| IPI00020021       | Protein DEK                                           | S 244  | 100% (1,000.00)          | 1.0000                                | 4         | 10 | 0       | 0         | 0    | 2    | 0    | 0    | 0    | 0    | 0    | 0    | 1    | 0    | 0    | 0    | 0    | 0    | 0    | 1    | 0         | 0    | 0    | 0    | 2    | 4    | 0    | 0    | 0    | 0    | 0    | 1    | 0    | 0    | 0    | 0    | 0    | 1    | 2    | 0    | 0 | 0 |   |   |   |   |
| IPI00020021       | Protein DEK                                           | S 251  | 100% (1,000.00)          | 1.0000                                | 3         | 10 | 0       | 0         | 0    | 1    | 0    | 0    | 0    | 0    | 0    | 0    | 0    | 0    | 0    | 0    | 0    | 1    | 0    | 1    | 0         | 0    | 0    | 0    | 2    | 3    | 0    | 0    | 0    | 0    | 0    | 0    | 1    | 0    | 0    | 0    | 1    | 1    | 2    | 0    | 0 | 0 |   |   |   |   |
| IPI00020060       | Sodium/hydrogen exchanger 1                           | S 703  | 100% (62.08)             | 1.0000                                | 5         | 4  | 1       | 1         | 0    | 0    | 0    | 0    | 1    | 1    | 0    | 0    | 0    | 0    | 0    | 0    | 0    | 1    | 0    | 0    | 0         | 0    | 1    | 0    | 0    | 0    | 0    | 0    | 0    | 1    | 0    | 0    | 0    | 0    | 1    | 1    | 0    | 0    | 0    | 0    | 0 | 0 |   |   |   |   |
| IPI00020513       | Zyxin                                                 | S 341  | 100% (79.00)             | 1.0000                                | 15        | 18 | 0       | 0         | 1    | 2    | 0    | 0    | 0    | 2    | 2    | 4    | 0    | 0    | 0    | 0    | 0    | 0    | 1    | 3    | 0         | 0    | 0    | 1    | 2    | 1    | 3    | 0    | 0    | 0    | 2    | 1    | 2    | 0    | 0    | 0    | 2    | 2    | 2    | 0    | 0 | 0 | 0 |   |   |   |
| IPI00020513       | Zyxin                                                 | S 404  | 100% (62.18)             | 1.0000                                | 9         | 17 | 0       | 1         | 2    | 0    | 0    | 0    | 0    | 0    | 1    | 2    | 0    | 0    | 0    | 0    | 1    | 1    | 1    | 0    | 0         | 0    | 1    | 1    | 1    | 1    | 1    | 0    | 1    | 1    | 1    | 0    | 1    | 2    | 1    | 1    | 2    | 1    | 1    | 0    | 0 | 0 |   |   |   |   |
| IPI00020898       | Ribosomal protein S6 kinase alpha-3                   | S 715  | 100% (1,000.00)          | 1.0000                                | 0         | 2  | 0       | 0         | 0    | 0    | 0    | 0    | 0    | 0    | 0    | 0    | 0    | 0    | 0    | 0    | 0    | 0    | 0    | 0    | 0         | 0    | 1    | 0    | 0    | 0    | 0    | 0    | 0    | 0    | 1    | 0    | 0    | 0    | 0    | 0    | 0    | 0    | 0    | 0    | 0 | 0 |   |   |   |   |
| IPI00020956       | Hepatoma-derived growth factor                        | S 132  | 100% (1,000.00)          | 1.0000                                | 33        | 40 | 1       | 2         | 1    | 6    | 2    | 0    | 1    | 2    | 0    | 7    | 1    | 0    | 0    | 0    | 1    | 0    | 1    | 0    | 7         | 2    | 0    | 1    | 2    | 0    | 10   | 2    | 0    | 0    | 1    | 2    | 10   | 0    | 0    | 1    | 1    | 1    | 9    | 0    | 0 | 0 |   |   |   |   |
| IPI00020956       | Hepatoma-derived growth factor                        | S 133  | 100% (1,000.00)          | 1.0000                                | 30        | 34 | 1       | 2         | 1    | 6    | 2    | 0    | 1    | 2    | 0    | 5    | 1    | 0    | 0    | 0    | 1    | 0    | 6    | 2    | 0         | 1    | 2    | 0    | 8    | 2    | 0    | 0    | 1    | 2    | 8    | 0    | 0    | 1    | 1    | 1    | 7    | 0    | 0    | 0    | 0 | 0 |   |   |   |   |
| IPI00020956       | Hepatoma-derived growth factor                        | S 165  | 100% (1,000.00)          | 1.0000                                | 30        | 35 | 2       | 2         | 1    | 4    | 1    | 0    | 2    | 1    | 1    | 5    | 1    | 0    | 1    | 0    | 1    | 6    | 2    | 0    | 3         | 0    | 4    | 6    | 2    | 0    | 3    | 0    | 2    | 5    | 0    | 0    | 1    | 0    | 0    | 1    | 0    | 2    | 7    | 0    | 0 | 0 |   |   |   |   |
| IPI00020984       | Calnexin precursor                                    | S 554  | 100% (79.03)             | 1.0000                                | 28        | 36 | 1       | 3         | 2    | 2    | 1    | 0    | 2    | 2    | 1    | 1    | 1    | 0    | 1    | 3    | 6    | 1    | 1    | 0    | 0         | 3    | 6    | 1    | 1    | 0    | 0    | 3    | 6    | 1    | 1    | 0    | 1    | 4    | 5    | 3    | 2    | 0    | 0    | 2    | 5 | 1 | 1 |   |   |   |
| IPI00020984       | Calnexin precursor                                    | S 583  | 100% (1,000.00)          | 1.0000                                | 12        | 10 | 1       | 1         | 1    | 0    | 0    | 0    | 1    | 1    | 1    | 1    | 1    | 0    | 1    | 1    | 0    | 1    | 1    | 0    | 0         | 1    | 0    | 1    | 1    | 1    | 0    | 1    | 1    | 1    | 0    | 0    | 0    | 1    | 0    | 1    | 1    | 0    | 0    | 0    | 0 | 0 |   |   |   |   |
| IPI00021048       | Isoform 1 of Myoferlin                                | S 1915 | 100% (81.67)             | 1.0000                                | 4         | 5  | 1       | 0         | 1    | 0    | 0    | 0    | 1    | 0    | 1    | 0    | 0    | 0    | 0    | 0    | 0    | 0    | 0    | 0    | 0         | 2    | 0    | 0    | 0    | 0    | 0    | 0    | 0    | 0    | 1    | 0    | 0    | 0    | 0    | 0    | 2    | 0    | 0    | 0    | 0 | 0 |   |   |   |   |
| IPI00021175       | Cell division cycle 2-related protein kinase 7        | S 681  | 100% (66.00)             | 1.0000                                | 8         | 7  | 2       | 1         | 0    | 0    | 0    | 0    | 2    | 0    | 0    | 0    | 0    | 0    | 0    | 1    | 2    | 0    | 0    | 0    | 0         | 0    | 1    | 1    | 0    | 0    | 0    | 0    | 0    | 1    | 0    | 0    | 0    | 0    | 0    | 0    | 3    | 1    | 0    | 0    | 0 | 0 |   |   |   |   |
| IPI00021175       | Cell division cycle 2-related protein kinase 7        | S 685  | 100% (76.82)             | 1.0000                                | 5         | 4  | 1       | 1         | 0    | 0    | 0    | 0    | 1    | 0    | 0    | 0    | 0    | 0    | 0    | 0    | 2    | 0    | 0    | 0    | 0         | 0    | 1    | 0    | 0    | 0    | 0    | 0    | 0    | 0    | 0    | 0    | 0    | 0    | 0    | 2    | 1    | 0    | 0    | 0    | 0 |   |   |   |   |   |
| IPI00021290       | ATP-citrate synthase                                  | S 481  | 100% (41.57)             | 1.0000                                | 13        | 10 | 0       | 3         | 0    | 0    | 0    | 0    | 1    | 4    | 0    | 0    | 0    | 0    | 0    | 0    | 1    | 4    | 0    | 0    | 0         | 0    | 2    | 2    | 0    | 0    | 0    | 0    | 0    | 2    | 1    | 0    | 0    | 0    | 0    | 0    | 1    | 2    | 0    | 0    | 0 | 0 |   |   |   |   |
| IPI00021363       | Jumonji/ARID domain-containing protein 1A             | S 1111 | 100% (89.37)             | 1.0000                                | 3         | 0  | 0       | 0         | 0    | 0    | 0    | 0    | 2    | 0    | 0    | 0    | 0    | 0    | 0    | 1    | 0    | 0    | 0    | 0    | 0         | 0    | 0    | 0    | 0    | 0    | 0    | 0    | 0    | 0    | 0    | 0    | 0    | 0    | 0    | 0    | 0    | 0    | 0    | 0    | 0 | 0 |   |   |   |   |
| IPI00021363       | Jumonji/ARID domain-containing protein 1A             | S 1493 | 100% (1,000.00)          | 1.0000                                | 1         | 0  | 0       | 0         | 0    | 0    | 0    | 0    | 0    | 0    | 1    | 0    | 0    | 0    | 0    | 0    | 0    | 0    | 0    | 0    | 0         | 0    | 0    | 0    | 0    | 0    | 0    | 0    | 0    | 0    | 0    | 0    | 0    | 0    | 0    | 0    | 0    | 0    | 0    | 0    | 0 | 0 |   |   |   |   |
| IPI00021417       | U4/U6.U5 tri-snRNP-associated protein 1               | S 448  | 100% (96.71)             | 1.0000                                | 12        | 13 | 0       | 3         | 1    | 0    | 0    | 0    | 0    | 0    | 3    | 1    | 0    | 0    | 0    | 0    | 1    | 2    | 1    | 0    | 0         | 0    | 0    | 3    | 1    | 0    | 0    | 0    | 0    | 1    | 2    | 1    | 0    | 0    | 0    | 0    | 1    | 3    | 1    | 0    | 0 | 0 | 0 |   |   |   |
| IPI00021417       |                                                       |        |                          |                                       |           |    |         |           |      |      |      |      |      |      |      |      |      |      |      |      |      |      |      |      |           |      |      |      |      |      |      |      |      |      |      |      |      |      |      |      |      |      |      |      |   |   |   |   |   |   |



Supplemental Table 3. A list of phosphorylation sites and their counts in SNU216 and SNU216-LR.

| Protein accession | Protein name                                           | Site   | Best Ascore <sup>1</sup> | Localization Probability <sup>2</sup> | Total No. |           | SNU216 |      |      |      |      |      |      |      |      |      |      |      |      |      |      |      |      |      | SNU216-LR |      |      |      |      |      |      |      |      |      |      |      |      |      |      |      |      |      |   |   |   |   |
|-------------------|--------------------------------------------------------|--------|--------------------------|---------------------------------------|-----------|-----------|--------|------|------|------|------|------|------|------|------|------|------|------|------|------|------|------|------|------|-----------|------|------|------|------|------|------|------|------|------|------|------|------|------|------|------|------|------|---|---|---|---|
|                   |                                                        |        |                          |                                       | SNU 216   | SNU 216LR | 1_01   | 2_01 | 3_01 | 4_01 | 5_01 | 6_01 | 1_02 | 2_02 | 3_02 | 4_02 | 5_02 | 6_02 | 1_03 | 2_03 | 3_03 | 4_03 | 5_03 | 6_03 | 1_01      | 2_01 | 3_01 | 4_01 | 5_01 | 6_01 | 1_02 | 2_02 | 3_02 | 4_02 | 5_02 | 6_02 | 1_03 | 2_03 | 3_03 | 4_03 | 5_03 | 6_03 |   |   |   |   |
| IP100028954       | 80 kda MCM3-associated protein                         | S 538  | 100% (78.15)             | 1.0000                                | 4         | 4         | 1      | 0    | 0    | 0    | 0    | 0    | 1    | 0    | 0    | 0    | 0    | 0    | 2    | 0    | 0    | 0    | 0    | 0    | 0         | 0    | 0    | 0    | 0    | 0    | 0    | 2    | 0    | 0    | 0    | 0    | 0    | 2    | 0    | 0    | 0    | 0    | 0 | 0 |   |   |
| IP100028955       | Ribosome biogenesis protein BOP1                       | S 126  | 100% (43.86)             | 1.0000                                | 8         | 7         | 1      | 1    | 0    | 0    | 0    | 0    | 1    | 2    | 0    | 0    | 0    | 0    | 1    | 2    | 0    | 0    | 0    | 0    | 1         | 1    | 0    | 0    | 0    | 0    | 1    | 1    | 0    | 0    | 0    | 0    | 0    | 0    | 1    | 2    | 0    | 0    | 0 | 0 |   |   |
| IP100028955       | Ribosome biogenesis protein BOP1                       | S 127  | 100% (42.05)             | 1.0000                                | 6         | 7         | 1      | 1    | 0    | 0    | 0    | 0    | 1    | 1    | 0    | 0    | 0    | 0    | 1    | 1    | 0    | 0    | 0    | 0    | 1         | 1    | 0    | 0    | 0    | 0    | 1    | 1    | 0    | 0    | 0    | 0    | 0    | 1    | 2    | 0    | 0    | 0    | 0 |   |   |   |
| IP100029011       | Kinesin family member 18                               | S 1487 | 100% (1,000.00)          | 1.0000                                | 8         | 6         | 2      | 0    | 0    | 0    | 0    | 0    | 3    | 0    | 0    | 0    | 0    | 0    | 3    | 0    | 0    | 0    | 0    | 0    | 2         | 0    | 0    | 0    | 0    | 0    | 2    | 0    | 0    | 0    | 0    | 0    | 0    | 0    | 2    | 0    | 0    | 0    | 0 | 0 |   |   |
| IP100029012       | Eukaryotic translation initiation factor 3 subunit 10  | S 1336 | 100% (1,000.00)          | 1.0000                                | 0         | 2         | 2      | 0    | 0    | 0    | 0    | 0    | 0    | 0    | 0    | 0    | 0    | 0    | 0    | 0    | 0    | 0    | 0    | 0    | 1         | 0    | 0    | 0    | 0    | 0    | 0    | 0    | 0    | 0    | 0    | 0    | 0    | 0    | 0    | 1    | 0    | 0    | 0 | 0 |   |   |
| IP100029159       | Isoform 1 of Double-strand break repair protein MRE11A | S 688  | 100% (123.96)            | 1.0000                                | 3         | 3         | 0      | 2    | 0    | 0    | 0    | 0    | 0    | 0    | 0    | 0    | 0    | 0    | 0    | 1    | 0    | 0    | 0    | 0    | 0         | 2    | 0    | 0    | 0    | 0    | 1    | 0    | 0    | 0    | 0    | 0    | 0    | 0    | 0    | 0    | 0    | 0    | 0 | 0 |   |   |
| IP100029159       | Isoform 1 of Double-strand break repair protein MRE11A | S 689  | 100% (129.29)            | 1.0000                                | 1         | 1         | 0      | 1    | 0    | 0    | 0    | 0    | 0    | 0    | 0    | 0    | 0    | 0    | 0    | 0    | 0    | 0    | 0    | 0    | 1         | 0    | 0    | 0    | 0    | 0    | 0    | 0    | 0    | 0    | 0    | 0    | 0    | 0    | 0    | 0    | 0    | 0    | 0 | 0 |   |   |
| IP100029702       | Isoform 1 of Protein tyrosine kinase 2 beta            | S 375  | 100% (1,000.00)          | 1.0000                                | 5         | 2         | 0      | 3    | 0    | 0    | 0    | 0    | 0    | 1    | 0    | 0    | 0    | 0    | 0    | 1    | 0    | 0    | 0    | 0    | 0         | 1    | 0    | 0    | 0    | 0    | 0    | 1    | 0    | 0    | 0    | 0    | 0    | 0    | 0    | 0    | 0    | 1    | 0 | 0 | 0 | 0 |
| IP100029778       | Isoform 1 of Tumor suppressor p53-binding protein 1    | S 265  | 100% (100.23)            | 1.0000                                | 12        | 10        | 2      | 1    | 1    | 0    | 0    | 0    | 2    | 1    | 1    | 0    | 0    | 0    | 2    | 1    | 1    | 0    | 0    | 0    | 2         | 1    | 0    | 0    | 0    | 0    | 3    | 1    | 0    | 0    | 0    | 0    | 0    | 2    | 1    | 0    | 0    | 0    | 0 | 0 |   |   |
| IP100029778       | Isoform 1 of Tumor suppressor p53-binding protein 1    | S 294  | 100% (78.16)             | 1.0000                                | 8         | 4         | 2      | 1    | 0    | 0    | 0    | 0    | 2    | 0    | 0    | 0    | 0    | 0    | 3    | 0    | 0    | 0    | 0    | 0    | 2         | 1    | 0    | 0    | 0    | 0    | 1    | 0    | 0    | 0    | 0    | 0    | 0    | 0    | 0    | 0    | 0    | 0    | 0 | 0 |   |   |
| IP100029778       | Isoform 1 of Tumor suppressor p53-binding protein 1    | S 809  | 100% (38.16)             | 1.0000                                | 7         | 9         | 2      | 0    | 0    | 0    | 0    | 0    | 2    | 0    | 0    | 0    | 0    | 0    | 3    | 0    | 0    | 0    | 0    | 0    | 3         | 0    | 0    | 0    | 0    | 0    | 3    | 0    | 0    | 0    | 0    | 0    | 0    | 0    | 3    | 0    | 0    | 0    | 0 | 0 |   |   |
| IP100029778       | Isoform 1 of Tumor suppressor p53-binding protein 1    | S 1362 | 100% (1,000.00)          | 1.0000                                | 0         | 1         | 0      | 0    | 0    | 0    | 0    | 0    | 0    | 0    | 0    | 0    | 0    | 0    | 0    | 0    | 0    | 0    | 0    | 0    | 0         | 0    | 0    | 0    | 0    | 0    | 1    | 0    | 0    | 0    | 0    | 0    | 0    | 0    | 0    | 0    | 0    | 0    | 0 | 0 |   |   |
| IP100029778       | Isoform 1 of Tumor suppressor p53-binding protein 1    | S 1618 | 100% (1,000.00)          | 1.0000                                | 3         | 3         | 1      | 0    | 0    | 0    | 0    | 0    | 1    | 0    | 0    | 0    | 0    | 0    | 1    | 0    | 0    | 0    | 0    | 0    | 1         | 0    | 0    | 0    | 0    | 0    | 1    | 0    | 0    | 0    | 0    | 0    | 0    | 1    | 0    | 0    | 0    | 0    | 0 | 0 |   |   |
| IP100029822       | SMARCA4 isoform 2                                      | S 695  | 100% (1,000.00)          | 1.0000                                | 9         | 8         | 2      | 0    | 0    | 0    | 0    | 0    | 3    | 0    | 0    | 0    | 0    | 0    | 4    | 0    | 0    | 0    | 0    | 0    | 3         | 0    | 0    | 0    | 0    | 0    | 1    | 0    | 0    | 0    | 0    | 0    | 0    | 4    | 0    | 0    | 0    | 0    | 0 | 0 |   |   |
| IP100029822       | SMARCA4 isoform 2                                      | S 699  | 100% (1,000.00)          | 1.0000                                | 2         | 1         | 1      | 0    | 0    | 0    | 0    | 0    | 1    | 0    | 0    | 0    | 0    | 0    | 0    | 0    | 0    | 0    | 0    | 0    | 0         | 0    | 0    | 0    | 0    | 0    | 0    | 0    | 0    | 0    | 0    | 0    | 0    | 0    | 0    | 0    | 1    | 0    | 0 | 0 | 0 |   |
| IP100029822       | SMARCA4 isoform 2                                      | S 1484 | 100% (43.92)             | 1.0000                                | 1         | 2         | 0      | 0    | 0    | 0    | 0    | 0    | 0    | 0    | 0    | 0    | 0    | 0    | 0    | 1    | 0    | 0    | 0    | 0    | 1         | 0    | 0    | 0    | 0    | 0    | 0    | 0    | 0    | 0    | 0    | 0    | 0    | 0    | 0    | 1    | 0    | 0    | 0 | 0 |   |   |
| IP100029822       | SMARCA4 isoform 2                                      | S 1659 | 100% (1,000.00)          | 1.0000                                | 4         | 2         | 1      | 0    | 0    | 0    | 0    | 0    | 1    | 0    | 0    | 0    | 0    | 0    | 2    | 0    | 0    | 0    | 0    | 0    | 0         | 0    | 0    | 0    | 0    | 0    | 1    | 0    | 0    | 0    | 0    | 0    | 0    | 0    | 1    | 0    | 0    | 0    | 0 | 0 |   |   |
| IP100029822       | SMARCA4 isoform 2                                      | S 1663 | 100% (1,000.00)          | 1.0000                                | 6         | 2         | 2      | 0    | 0    | 0    | 0    | 0    | 2    | 0    | 0    | 0    | 0    | 0    | 2    | 0    | 0    | 0    | 0    | 0    | 0         | 0    | 0    | 0    | 0    | 0    | 0    | 0    | 0    | 0    | 0    | 0    | 0    | 1    | 0    | 0    | 0    | 0    | 0 | 0 |   |   |
| IP100030131       | thymopoietin isoform beta                              | S 66   | 100% (58.31)             | 1.0000                                | 30        | 37        | 2      | 2    | 3    | 2    | 1    | 0    | 2    | 2    | 1    | 3    | 0    | 0    | 1    | 2    | 3    | 4    | 2    | 0    | 1         | 4    | 4    | 5    | 1    | 0    | 0    | 3    | 5    | 3    | 1    | 0    | 1    | 2    | 2    | 4    | 1    | 0    | 0 | 0 |   |   |
| IP100030131       | thymopoietin isoform beta                              | S 67   | 100% (64.27)             | 1.0000                                | 9         | 28        | 1      | 1    | 2    | 1    | 1    | 0    | 1    | 1    | 2    | 2    | 0    | 0    | 1    | 1    | 2    | 3    | 0    | 0    | 0         | 3    | 3    | 4    | 1    | 0    | 0    | 2    | 4    | 4    | 0    | 0    | 1    | 1    | 2    | 3    | 0    | 0    | 0 |   |   |   |
| IP100030131       | thymopoietin isoform beta                              | S 306  | 100% (102.87)            | 1.0000                                | 7         | 15        | 0      | 0    | 1    | 1    | 0    | 0    | 0    | 0    | 2    | 1    | 0    | 0    | 0    | 0    | 2    | 0    | 0    | 0    | 0         | 0    | 2    | 0    | 0    | 0    | 0    | 2    | 0    | 0    | 0    | 1    | 2    | 1    | 2    | 0    | 0    | 2    | 1 | 2 | 0 |   |
| IP100030274       | hypothetical protein LOC84081 isoform 1                | S 254  | 100% (49.79)             | 1.0000                                | 2         | 0         | 0      | 1    | 0    | 0    | 0    | 0    | 0    | 0    | 0    | 0    | 0    | 0    | 0    | 1    | 0    | 0    | 0    | 0    | 0         | 0    | 0    | 0    | 0    | 0    | 0    | 0    | 0    | 0    | 0    | 0    | 0    | 0    | 0    | 0    | 0    | 0    | 0 | 0 |   |   |
| IP100030408       | M-phase phosphoprotein 8                               | S 51   | 100% (1,000.00)          | 1.0000                                | 14        | 8         | 1      | 2    | 1    | 1    | 0    | 0    | 1    | 3    | 0    | 1    | 0    | 0    | 1    | 2    | 1    | 0    | 0    | 0    | 1         | 0    | 1    | 0    | 0    | 0    | 1    | 1    | 1    | 0    | 0    | 0    | 0    | 1    | 2    | 0    | 0    | 0    | 0 | 0 |   |   |
| IP100030408       | M-phase phosphoprotein 8                               | S 164  | 100% (1,000.00)          | 1.0000                                | 0         | 1         | 0      | 0    | 0    | 0    | 0    | 0    | 0    | 0    | 0    | 0    | 0    | 0    | 0    | 0    | 0    | 0    | 0    | 0    | 1         | 0    | 0    | 0    | 0    | 0    | 0    | 0    | 0    | 0    | 0    | 0    | 0    | 0    | 0    | 0    | 0    | 0    | 0 | 0 |   |   |
| IP100030531       | sarcolemma associated protein                          | S 148  | 100% (69.09)             | 1.0000                                | 0         | 1         | 0      | 0    | 0    | 0    | 0    | 0    | 0    | 0    | 0    | 0    | 0    | 0    | 0    | 0    | 0    | 0    | 0    | 0    | 0         | 0    | 0    | 0    | 0    | 0    | 0    | 0    | 0    | 0    | 0    | 0    | 1    | 0    | 0    | 0    | 0    | 0    | 0 |   |   |   |
| IP100030624       | Isoform 6 of SAPS domain family member 3               | S 588  | 100% (1,000.00)          | 1.0000                                | 10        | 10        | 1      | 2    | 1    | 0    | 0    | 0    | 1    | 1    | 1    | 0    | 0    | 0    | 1    | 2    | 0    | 0    | 0    | 0    | 1         | 2    | 1    | 0    | 0    | 0    | 1    | 1    | 1    | 0    | 0    | 0    | 0    | 1    | 1    | 1    | 0    | 0    | 0 | 0 |   |   |
| IP100030876       | Protein diaphanous homolog 1                           | S 22   | 100% (68.95)             | 1.00                                  |           |           |        |      |      |      |      |      |      |      |      |      |      |      |      |      |      |      |      |      |           |      |      |      |      |      |      |      |      |      |      |      |      |      |      |      |      |      |   |   |   |   |

Supplemental Table 3. A list of phosphorylation sites and their counts in SNU216 and SNU216-LR.

| Protein accession | Protein name                                                        | Site   | Best Ascore <sup>1</sup> | Localization Probability <sup>2</sup> | Total No. |           | SNU216 |      |      |      |      |      |      |      |      |      |      |      |      |      |      |      |      |      | SNU216-LR |      |      |      |      |      |      |      |      |      |      |      |      |      |      |      |      |      |   |   |   |
|-------------------|---------------------------------------------------------------------|--------|--------------------------|---------------------------------------|-----------|-----------|--------|------|------|------|------|------|------|------|------|------|------|------|------|------|------|------|------|------|-----------|------|------|------|------|------|------|------|------|------|------|------|------|------|------|------|------|------|---|---|---|
|                   |                                                                     |        |                          |                                       | SNU 216   | SNU 216LR | 1_01   | 2_01 | 3_01 | 4_01 | 5_01 | 6_01 | 1_02 | 2_02 | 3_02 | 4_02 | 5_02 | 6_02 | 1_03 | 2_03 | 3_03 | 4_03 | 5_03 | 6_03 | 1_01      | 2_01 | 3_01 | 4_01 | 5_01 | 6_01 | 1_02 | 2_02 | 3_02 | 4_02 | 5_02 | 6_02 | 1_03 | 2_03 | 3_03 | 4_03 | 5_03 | 6_03 |   |   |   |
| IP100045914       | Msx2-interacting protein                                            | S 1380 | 100% (1,000.00)          | 1.0000                                | 7         | 5         | 2      | 0    | 0    | 0    | 0    | 0    | 2    | 0    | 0    | 0    | 0    | 0    | 0    | 3    | 0    | 0    | 0    | 0    | 0         | 2    | 0    | 0    | 0    | 0    | 0    | 2    | 0    | 0    | 0    | 0    | 0    | 1    | 0    | 0    | 0    | 0    | 0 | 0 |   |
| IP100045914       | Msx2-interacting protein                                            | S 1382 | 100% (1,000.00)          | 1.0000                                | 3         | 2         | 1      | 0    | 0    | 0    | 0    | 0    | 1    | 0    | 0    | 0    | 0    | 0    | 0    | 1    | 0    | 0    | 0    | 0    | 0         | 1    | 0    | 0    | 0    | 0    | 0    | 1    | 0    | 0    | 0    | 0    | 0    | 0    | 0    | 0    | 0    | 0    | 0 | 0 |   |
| IP100055954       | WD-repeat protein 43                                                | S 120  | 100% (1,000.00)          | 1.0000                                | 3         | 2         | 0      | 1    | 1    | 0    | 0    | 0    | 0    | 0    | 0    | 1    | 0    | 0    | 0    | 0    | 0    | 0    | 0    | 0    | 0         | 0    | 1    | 1    | 0    | 0    | 0    | 0    | 0    | 0    | 0    | 0    | 0    | 0    | 0    | 0    | 0    | 0    | 0 | 0 |   |
| IP100055954       | WD-repeat protein 43                                                | S 474  | 100% (54.32)             | 1.0000                                | 5         | 6         | 0      | 1    | 2    | 0    | 0    | 0    | 0    | 0    | 0    | 2    | 0    | 0    | 0    | 0    | 0    | 0    | 0    | 0    | 0         | 0    | 0    | 1    | 0    | 0    | 0    | 0    | 0    | 0    | 0    | 0    | 0    | 0    | 0    | 0    | 0    | 0    | 0 | 0 |   |
| IP100061087       | Protein C9orf42                                                     | S 76   | 100% (1,000.00)          | 1.0000                                | 3         | 3         | 0      | 0    | 0    | 1    | 0    | 0    | 0    | 0    | 0    | 1    | 0    | 0    | 0    | 0    | 0    | 0    | 0    | 0    | 0         | 0    | 0    | 0    | 0    | 0    | 0    | 0    | 0    | 0    | 0    | 0    | 0    | 0    | 0    | 0    | 0    | 0    | 0 | 0 |   |
| IP100061758       | PRR8 protein                                                        | S 205  | 100% (104.94)            | 1.0000                                | 20        | 20        | 1      | 1    | 1    | 1    | 1    | 0    | 2    | 1    | 1    | 2    | 1    | 0    | 2    | 2    | 0    | 2    | 2    | 0    | 2         | 1    | 1    | 1    | 1    | 0    | 2    | 2    | 1    | 2    | 0    | 0    | 2    | 1    | 2    | 0    | 2    | 2    | 0 | 0 |   |
| IP100063219       | Hypothetical protein LOC92345                                       | S 315  | 100% (1,000.00)          | 1.0000                                | 4         | 6         | 0      | 0    | 1    | 0    | 0    | 0    | 0    | 0    | 0    | 1    | 0    | 0    | 0    | 0    | 0    | 0    | 0    | 0    | 0         | 0    | 0    | 0    | 0    | 0    | 0    | 0    | 0    | 0    | 0    | 0    | 0    | 0    | 0    | 0    | 0    | 0    | 0 | 0 |   |
| IP100063234       | PRKAR2A protein                                                     | S 78   | 100% (111.29)            | 1.0000                                | 18        | 21        | 0      | 0    | 2    | 3    | 0    | 0    | 1    | 0    | 2    | 4    | 0    | 0    | 1    | 0    | 1    | 4    | 0    | 0    | 0         | 0    | 3    | 4    | 0    | 0    | 0    | 0    | 2    | 4    | 0    | 0    | 0    | 0    | 0    | 0    | 3    | 4    | 1 | 0 |   |
| IP100063234       | PRKAR2A protein                                                     | S 80   | 100% (103.93)            | 1.0000                                | 17        | 19        | 0      | 0    | 2    | 3    | 0    | 0    | 1    | 0    | 2    | 3    | 0    | 0    | 1    | 0    | 1    | 4    | 0    | 0    | 0         | 0    | 3    | 3    | 0    | 0    | 0    | 0    | 2    | 4    | 0    | 0    | 0    | 0    | 0    | 0    | 3    | 3    | 1 | 0 |   |
| IP100064212       | KIAA1802 protein (Fragment)                                         | S 96   | 100% (1,000.00)          | 1.0000                                | 2         | 3         | 0      | 1    | 0    | 0    | 0    | 0    | 1    | 0    | 0    | 0    | 0    | 0    | 0    | 0    | 0    | 0    | 0    | 0    | 0         | 0    | 0    | 0    | 0    | 0    | 0    | 0    | 0    | 0    | 0    | 0    | 0    | 0    | 0    | 0    | 0    | 0    | 0 | 0 |   |
| IP100064212       | KIAA1802 protein (Fragment)                                         | S 213  | 100% (107.67)            | 1.0000                                | 15        | 20        | 2      | 3    | 1    | 0    | 0    | 0    | 1    | 3    | 1    | 0    | 0    | 0    | 0    | 0    | 0    | 0    | 0    | 0    | 0         | 0    | 0    | 0    | 0    | 0    | 0    | 0    | 0    | 0    | 0    | 0    | 0    | 0    | 0    | 0    | 0    | 0    | 0 | 0 |   |
| IP100064212       | KIAA1802 protein (Fragment)                                         | S 436  | 100% (1,000.00)          | 1.0000                                | 5         | 10        | 0      | 1    | 0    | 0    | 0    | 0    | 0    | 1    | 1    | 0    | 0    | 0    | 0    | 0    | 0    | 0    | 0    | 0    | 0         | 0    | 0    | 0    | 0    | 0    | 0    | 0    | 0    | 0    | 0    | 0    | 0    | 0    | 0    | 0    | 0    | 0    | 0 | 0 |   |
| IP100064212       | KIAA1802 protein (Fragment)                                         | S 441  | 100% (1,000.00)          | 1.0000                                | 2         | 4         | 0      | 0    | 0    | 0    | 0    | 0    | 0    | 0    | 0    | 1    | 0    | 0    | 0    | 0    | 0    | 0    | 0    | 0    | 0         | 0    | 0    | 0    | 0    | 0    | 0    | 0    | 0    | 0    | 0    | 0    | 0    | 0    | 0    | 0    | 0    | 0    | 0 | 0 |   |
| IP100064212       | KIAA1802 protein (Fragment)                                         | S 445  | 100% (1,000.00)          | 1.0000                                | 2         | 6         | 0      | 0    | 0    | 0    | 0    | 0    | 0    | 0    | 0    | 1    | 0    | 0    | 0    | 0    | 0    | 0    | 0    | 0    | 0         | 0    | 0    | 0    | 0    | 0    | 0    | 0    | 0    | 0    | 0    | 0    | 0    | 0    | 0    | 0    | 0    | 0    | 0 | 0 |   |
| IP100064212       | KIAA1802 protein (Fragment)                                         | S 461  | 100% (92.08)             | 1.0000                                | 15        | 14        | 2      | 2    | 0    | 0    | 0    | 0    | 3    | 3    | 0    | 0    | 0    | 0    | 0    | 2    | 3    | 0    | 0    | 0    | 0         | 0    | 2    | 3    | 1    | 0    | 0    | 0    | 0    | 0    | 0    | 0    | 0    | 0    | 0    | 0    | 0    | 0    | 0 | 0 | 0 |
| IP100064212       | KIAA1802 protein (Fragment)                                         | S 485  | 100% (1,000.00)          | 1.0000                                | 1         | 1         | 0      | 0    | 0    | 0    | 0    | 0    | 1    | 0    | 0    | 0    | 0    | 0    | 0    | 0    | 0    | 0    | 0    | 0    | 0         | 0    | 0    | 0    | 0    | 0    | 0    | 0    | 0    | 0    | 0    | 0    | 0    | 0    | 0    | 0    | 0    | 0    | 0 | 0 |   |
| IP100064931       | Isoform 2 of E1A-binding protein p400                               | S 2440 | 100% (1,000.00)          | 1.0000                                | 3         | 3         | 1      | 0    | 0    | 0    | 0    | 0    | 0    | 1    | 0    | 0    | 0    | 0    | 0    | 0    | 0    | 0    | 0    | 0    | 0         | 0    | 0    | 0    | 0    | 0    | 0    | 0    | 0    | 0    | 0    | 0    | 0    | 0    | 0    | 0    | 0    | 0    | 0 | 0 |   |
| IP100065931       | A-kinase anchor protein 13 isoform 1                                | S 1761 | 100% (1,000.00)          | 1.0000                                | 1         | 0         | 0      | 0    | 0    | 0    | 0    | 0    | 0    | 0    | 0    | 0    | 0    | 0    | 0    | 0    | 0    | 0    | 0    | 0    | 0         | 0    | 0    | 0    | 0    | 0    | 0    | 0    | 0    | 0    | 0    | 0    | 0    | 0    | 0    | 0    | 0    | 0    | 0 | 0 |   |
| IP100065931       | A-kinase anchor protein 13 isoform 1                                | S 1762 | 100% (1,000.00)          | 1.0000                                | 1         | 0         | 0      | 0    | 0    | 0    | 0    | 0    | 0    | 0    | 0    | 0    | 0    | 0    | 0    | 0    | 0    | 0    | 0    | 0    | 0         | 0    | 0    | 0    | 0    | 0    | 0    | 0    | 0    | 0    | 0    | 0    | 0    | 0    | 0    | 0    | 0    | 0    | 0 | 0 |   |
| IP100065931       | A-kinase anchor protein 13 isoform 1                                | S 1763 | 100% (1,000.00)          | 1.0000                                | 1         | 0         | 0      | 0    | 0    | 0    | 0    | 0    | 0    | 0    | 0    | 0    | 0    | 0    | 0    | 0    | 0    | 0    | 0    | 0    | 0         | 0    | 0    | 0    | 0    | 0    | 0    | 0    | 0    | 0    | 0    | 0    | 0    | 0    | 0    | 0    | 0    | 0    | 0 | 0 |   |
| IP100065931       | A-kinase anchor protein 13 isoform 1                                | S 2349 | 100% (1,000.00)          | 1.0000                                | 8         | 7         | 2      | 2    | 0    | 0    | 0    | 0    | 2    | 0    | 0    | 0    | 0    | 0    | 0    | 1    | 1    | 0    | 0    | 0    | 0         | 0    | 0    | 0    | 0    | 0    | 0    | 0    | 0    | 0    | 0    | 0    | 0    | 0    | 0    | 0    | 0    | 0    | 0 | 0 |   |
| IP100066641       | Ubiquitin-like PHD and RING finger domain-containing protein 1      | S 287  | 100% (1,000.00)          | 1.0000                                | 2         | 4         | 0      | 0    | 0    | 0    | 0    | 0    | 0    | 2    | 0    | 0    | 0    | 0    | 0    | 0    | 0    | 0    | 0    | 0    | 0         | 0    | 0    | 0    | 0    | 0    | 0    | 0    | 0    | 0    | 0    | 0    | 0    | 0    | 0    | 0    | 0    | 0    | 0 | 0 |   |
| IP100066641       | Ubiquitin-like PHD and RING finger domain-containing protein 1      | S 639  | 100% (1,000.00)          | 1.0000                                | 1         | 0         | 0      | 1    | 0    | 0    | 0    | 0    | 0    | 0    | 0    | 0    | 0    | 0    | 0    | 0    | 0    | 0    | 0    | 0    | 0         | 0    | 0    | 0    | 0    | 0    | 0    | 0    | 0    | 0    | 0    | 0    | 0    | 0    | 0    | 0    | 0    | 0    | 0 | 0 |   |
| IP100069084       | Isoform 1 of Transformation/transcription domain-associated protein | S 207  | 100% (1,000.00)          | 1.0000                                | 1         | 0         | 0      | 0    | 0    | 0    | 0    | 0    | 0    | 0    | 0    | 0    | 0    | 0    | 0    | 0    | 0    | 0    | 0    | 0    | 0         | 0    | 0    | 0    | 0    | 0    | 0    | 0    | 0    | 0    | 0    | 0    | 0    | 0    | 0    | 0    | 0    | 0    | 0 | 0 |   |
| IP100069267       | Isoform 8 of GC-rich sequence DNA-binding factor homolog            | S 262  | 100% (1,000.00)          | 1.0000                                | 10        | 10        | 0      | 2    | 0    | 0    | 0    | 0    | 0    | 4    | 0    | 0    | 0    | 0    | 0    | 1    | 3    | 0    | 0    | 0    | 0         | 1    | 3    | 0    | 0    | 0    | 0    | 0    | 0    | 0    | 0    | 0    | 0    | 0    | 0    | 0    | 0    | 0    | 0 | 0 | 0 |
| IP100069309       | Hypothetical protein DKFZp434K1815                                  | S 212  | 100% (1,000.00)          | 1.0000                                | 16        | 19        | 2      | 2    | 1    | 0    | 0    | 0    | 2    | 3    | 1    | 0    | 0    | 0    | 2    | 2    | 0    | 0    | 1    | 0    | 3         | 3    | 1    | 0    | 0    | 0    | 0    | 0    | 0    | 0    | 0    | 0    | 0    | 0    | 0    | 0    | 0    | 0    | 0 | 0 | 0 |
| IP100069693       | 23 kDa protein                                                      | S 139  | 100% (1,000.00)          | 1.0000                                | 6         | 5         | 0      | 0    | 0    | 0    | 0    | 0    | 1    | 0    | 0    | 0    | 0    | 2    | 1    | 0    | 0    | 0    | 0    | 1    | 1         | 0    | 0    | 0    | 0    | 0    | 0    | 0    | 0    | 0    | 0    | 0    | 0    | 0    | 0    | 0    | 0    | 0    | 0 | 0 |   |
| IP100069817       | Isoform 1 of Bromodomain adjacent to zinc finger domain protein 18  | S 1147 | 100% (1,000.00)          | 1.0000                                | 1         | 0         | 0      | 0    | 0    | 0    | 0    | 0    | 0    | 0    | 0    | 0    | 0    | 0    | 0    | 0    | 0    | 0    | 0    | 0    | 0         | 0    | 0    | 0    | 0    | 0    | 0    | 0    | 0    | 0    | 0    | 0    | 0    | 0    | 0    | 0    | 0    | 0    | 0 | 0 |   |
| IP100069817       | Isoform 1 of Bromodomain adjacent to zinc finger domain protein 18  | S 1468 | 100% (79.03)             | 1.0000                                | 19        | 16        | 2      | 1    | 1    | 0    | 1    | 0    | 3    | 1    | 1    | 0    | 1    | 1    | 3    | 1    | 1    | 1    | 1    | 0    | 3         | 1    | 1    | 1    | 0    | 0    | 2    | 0    | 1    | 0    | 1    | 1    | 2    | 0    | 1    | 0    | 0    | 0    | 0 | 0 |   |
| IP100071185       | Isoform SV1 of PITSLRE serine/threonine-protein kinase CDC2L1       | S 47   | 100% (1,000.00)          | 1.0000                                | 5         | 2         | 0      | 1    | 0    | 0    | 0    | 0    | 0    | 1    | 0    | 0    | 0    | 0    | 0    | 0    | 0    | 0    | 0    | 0    | 0         | 0    | 0    | 0    | 0    | 0    | 0    | 0    | 0    | 0    | 0    | 0    | 0    | 0    | 0    | 0    | 0    | 0    | 0 | 0 |   |
| IP100071188       | Isoform SV10 of PITSLRE ser                                         |        |                          |                                       |           |           |        |      |      |      |      |      |      |      |      |      |      |      |      |      |      |      |      |      |           |      |      |      |      |      |      |      |      |      |      |      |      |      |      |      |      |      |   |   |   |

Supplemental Table 3. A list of phosphorylation sites and their counts in SNU216 and SNU216-LR.

| Protein accession | Protein name                                         | Site   | Best Ascore <sup>1</sup> | Localization Probability <sup>2</sup> | Total No. |           | SNU216 |      |      |      |      |      |      |      |      |      |      |      |      |      |      |      |      |      | SNU216-LR |      |      |      |      |      |      |      |      |      |      |      |      |      |      |      |      |      |   |   |   |   |   |
|-------------------|------------------------------------------------------|--------|--------------------------|---------------------------------------|-----------|-----------|--------|------|------|------|------|------|------|------|------|------|------|------|------|------|------|------|------|------|-----------|------|------|------|------|------|------|------|------|------|------|------|------|------|------|------|------|------|---|---|---|---|---|
|                   |                                                      |        |                          |                                       | SNU 216   | SNU 216LR | 1_01   | 2_01 | 3_01 | 4_01 | 5_01 | 6_01 | 1_02 | 2_02 | 3_02 | 4_02 | 5_02 | 6_02 | 1_03 | 2_03 | 3_03 | 4_03 | 5_03 | 6_03 | 1_01      | 2_01 | 3_01 | 4_01 | 5_01 | 6_01 | 1_02 | 2_02 | 3_02 | 4_02 | 5_02 | 6_02 | 1_03 | 2_03 | 3_03 | 4_03 | 5_03 | 6_03 |   |   |   |   |   |
| IP100103090       | Hypothetical protein LEO1                            | S 197  | 100% (1,000.00)          | 1.0000                                | * 1       | * 2       | 0      | 0    | 0    | 0    | 0    | 0    | 0    | 0    | 0    | 0    | 0    | 0    | 0    | 0    | 0    | 0    | 0    | 0    | 0         | 0    | 0    | 0    | 0    | 0    | 0    | 0    | 0    | 0    | 0    | 0    | 0    | 0    | 0    | 0    | 0    | 0    | 0 | 0 | 0 |   |   |
| IP100103090       | Hypothetical protein LEO1                            | S 212  | 100% (1,000.00)          | 1.0000                                | * 1       | 0         | 0      | 1    | 0    | 0    | 0    | 0    | 0    | 0    | 0    | 0    | 0    | 0    | 0    | 0    | 0    | 0    | 0    | 0    | 0         | 0    | 0    | 0    | 0    | 0    | 0    | 0    | 0    | 0    | 0    | 0    | 0    | 0    | 0    | 0    | 0    | 0    | 0 | 0 | 0 | 0 |   |
| IP100103090       | Hypothetical protein LEO1                            | S 220  | 100% (1,000.00)          | 1.0000                                | * 1       | 0         | 0      | 1    | 0    | 0    | 0    | 0    | 0    | 0    | 0    | 0    | 0    | 0    | 0    | 0    | 0    | 0    | 0    | 0    | 0         | 0    | 0    | 0    | 0    | 0    | 0    | 0    | 0    | 0    | 0    | 0    | 0    | 0    | 0    | 0    | 0    | 0    | 0 | 0 | 0 | 0 |   |
| IP100103090       | Hypothetical protein LEO1                            | S 229  | 100% (1,000.00)          | 1.0000                                | 0         | * 1       | 0      | 0    | 0    | 0    | 0    | 0    | 0    | 0    | 0    | 0    | 0    | 0    | 0    | 0    | 0    | 0    | 0    | 0    | 0         | 0    | 0    | 0    | 0    | 0    | 0    | 0    | 0    | 0    | 0    | 0    | 0    | 0    | 0    | 0    | 0    | 0    | 0 | 0 | 0 | 0 |   |
| IP100103090       | Hypothetical protein LEO1                            | S 238  | 100% (1,000.00)          | 1.0000                                | 0         | * 1       | 0      | 0    | 0    | 0    | 0    | 0    | 0    | 0    | 0    | 0    | 0    | 0    | 0    | 0    | 0    | 0    | 0    | 0    | 0         | 0    | 0    | 0    | 0    | 0    | 0    | 0    | 0    | 0    | 0    | 0    | 0    | 0    | 0    | 0    | 0    | 0    | 0 | 0 | 0 | 0 |   |
| IP100103090       | Hypothetical protein LEO1                            | S 246  | 100% (1,000.00)          | 1.0000                                | * 2       | 0         | 0      | 1    | 0    | 0    | 0    | 0    | 0    | 1    | 0    | 0    | 0    | 0    | 0    | 0    | 0    | 0    | 0    | 0    | 0         | 0    | 0    | 0    | 0    | 0    | 0    | 0    | 0    | 0    | 0    | 0    | 0    | 0    | 0    | 0    | 0    | 0    | 0 | 0 | 0 | 0 |   |
| IP100103090       | Hypothetical protein LEO1                            | S 254  | 100% (1,000.00)          | 1.0000                                | * 2       | 0         | 0      | 1    | 0    | 0    | 0    | 0    | 0    | 1    | 0    | 0    | 0    | 0    | 0    | 0    | 0    | 0    | 0    | 0    | 0         | 0    | 0    | 0    | 0    | 0    | 0    | 0    | 0    | 0    | 0    | 0    | 0    | 0    | 0    | 0    | 0    | 0    | 0 | 0 | 0 | 0 |   |
| IP100103090       | Hypothetical protein LEO1                            | S 277  | 100% (1,000.00)          | 1.0000                                | 0         | * 1       | 0      | 0    | 0    | 0    | 0    | 0    | 0    | 0    | 0    | 0    | 0    | 0    | 0    | 0    | 0    | 0    | 0    | 0    | 0         | 1    | 0    | 0    | 0    | 0    | 0    | 0    | 0    | 0    | 0    | 0    | 0    | 0    | 0    | 0    | 0    | 0    | 0 | 0 | 0 | 0 |   |
| IP100103090       | Hypothetical protein LEO1                            | S 279  | 100% (1,000.00)          | 1.0000                                | 0         | * 1       | 0      | 0    | 0    | 0    | 0    | 0    | 0    | 0    | 0    | 0    | 0    | 0    | 0    | 0    | 0    | 0    | 0    | 0    | 0         | 1    | 0    | 0    | 0    | 0    | 0    | 0    | 0    | 0    | 0    | 0    | 0    | 0    | 0    | 0    | 0    | 0    | 0 | 0 | 0 | 0 |   |
| IP100103090       | Hypothetical protein LEO1                            | S 630  | 100% (70.09)             | 1.0000                                | * 15      | * 23      | 1      | 4    | 0    | 0    | 1    | 0    | 1    | 3    | 0    | 0    | 1    | 0    | 0    | 4    | 0    | 0    | 0    | 0    | 1         | 6    | 1    | 0    | 1    | 0    | 0    | 6    | 2    | 0    | 0    | 0    | 0    | 1    | 4    | 1    | 0    | 0    | 0 | 0 | 0 |   |   |
| IP100103552       | mucin 16                                             | S 993  | 100% (1,000.00)          | 1.0000                                | * 11      | * 5       | 0      | 0    | 0    | 0    | 3    | 0    | 0    | 0    | 0    | 0    | 3    | 1    | 1    | 0    | 0    | 0    | 0    | 3    | 0         | 0    | 0    | 0    | 0    | 0    | 0    | 0    | 0    | 0    | 0    | 0    | 0    | 0    | 2    | 1    | 0    | 0    | 0 | 0 | 2 |   |   |
| IP100103654       | Hypothetical protein                                 | S 311  | 100% (95.27)             | 1.0000                                | * 1       | 0         | 0      | 0    | 0    | 0    | 0    | 0    | 0    | 0    | 0    | 0    | 1    | 0    | 0    | 0    | 0    | 0    | 0    | 0    | 0         | 0    | 0    | 0    | 0    | 0    | 0    | 0    | 0    | 0    | 0    | 0    | 0    | 0    | 0    | 0    | 0    | 0    | 0 | 0 | 0 | 0 |   |
| IP100103756       | Mid-1-related chloride channel 4                     | S 253  | 100% (40.81)             | 1.0000                                | 0         | * 1       | 0      | 0    | 0    | 0    | 0    | 0    | 0    | 0    | 0    | 0    | 0    | 0    | 0    | 0    | 0    | 0    | 0    | 0    | 0         | 0    | 0    | 0    | 0    | 0    | 0    | 0    | 0    | 0    | 0    | 0    | 0    | 0    | 0    | 0    | 0    | 0    | 0 | 0 | 0 | 0 |   |
| IP100103757       | Mid-1-related chloride channel 3                     | S 317  | 100% (40.81)             | 1.0000                                | 0         | * 1       | 0      | 0    | 0    | 0    | 0    | 0    | 0    | 0    | 0    | 0    | 0    | 0    | 0    | 0    | 0    | 0    | 0    | 0    | 0         | 0    | 0    | 0    | 0    | 0    | 0    | 0    | 0    | 0    | 0    | 0    | 0    | 0    | 0    | 0    | 0    | 0    | 0 | 0 | 0 | 0 |   |
| IP100104050       | Thyroid hormone receptor-associated protein 3        | S 248  | 100% (71.28)             | 1.0000                                | * 36      | * 31      | 4      | 3    | 3    | 1    | 0    | 0    | 4    | 4    | 4    | 1    | 0    | 0    | 4    | 4    | 3    | 1    | 0    | 0    | 3         | 3    | 3    | 0    | 0    | 0    | 3    | 3    | 2    | 1    | 0    | 0    | 4    | 5    | 2    | 1    | 0    | 1    | 0 | 1 | 0 | 1 |   |
| IP100104050       | Thyroid hormone receptor-associated protein 3        | S 575  | 100% (1,000.00)          | 1.0000                                | * 5       | * 1       | 0      | 1    | 0    | 0    | 0    | 0    | 1    | 1    | 0    | 0    | 0    | 0    | 0    | 2    | 0    | 0    | 0    | 0    | 0         | 1    | 0    | 0    | 0    | 0    | 0    | 0    | 0    | 0    | 0    | 0    | 0    | 0    | 0    | 0    | 0    | 0    | 0 | 0 | 0 | 0 |   |
| IP100104050       | Thyroid hormone receptor-associated protein 3        | S 698  | 100% (1,000.00)          | 1.0000                                | * 13      | * 28      | 1      | 2    | 2    | 0    | 0    | 0    | 1    | 3    | 0    | 0    | 0    | 0    | 4    | 0    | 0    | 0    | 0    | 3    | 3         | 2    | 0    | 0    | 0    | 3    | 4    | 2    | 1    | 0    | 0    | 2    | 5    | 3    | 0    | 0    | 0    | 0    | 0 | 0 | 0 |   |   |
| IP100104050       | Thyroid hormone receptor-associated protein 3        | S 928  | 100% (96.17)             | 1.0000                                | * 27      | * 19      | 5      | 4    | 0    | 0    | 0    | 0    | 4    | 5    | 0    | 0    | 0    | 0    | 4    | 5    | 0    | 0    | 0    | 3    | 2         | 0    | 0    | 0    | 0    | 2    | 3    | 1    | 0    | 0    | 0    | 3    | 5    | 0    | 0    | 0    | 0    | 0    | 0 | 0 | 0 |   |   |
| IP100106495       | Condensin complex subunit 3                          | S 1015 | 100% (1,000.00)          | 1.0000                                | * 5       | * 5       | 0      | 1    | 0    | 0    | 0    | 0    | 0    | 2    | 0    | 0    | 0    | 0    | 0    | 2    | 0    | 0    | 0    | 0    | 2         | 0    | 0    | 0    | 0    | 0    | 0    | 0    | 0    | 0    | 0    | 0    | 0    | 0    | 0    | 0    | 0    | 0    | 0 | 0 | 0 | 0 |   |
| IP100106567       | WD-repeat protein 33                                 | S 424  | 100% (1,000.00)          | 1.0000                                | * 1       | 0         | 0      | 0    | 0    | 0    | 0    | 0    | 0    | 0    | 0    | 0    | 0    | 0    | 0    | 0    | 0    | 0    | 0    | 1    | 0         | 0    | 0    | 0    | 0    | 0    | 0    | 0    | 0    | 0    | 0    | 0    | 0    | 0    | 0    | 0    | 0    | 0    | 0 | 0 | 0 | 0 |   |
| IP100106847       | Isoform GTBP-alt of DNA mismatch repair protein MSH6 | S 227  | 100% (101.73)            | 1.0000                                | * 3       | * 3       | 1      | 0    | 0    | 0    | 0    | 0    | 1    | 0    | 0    | 0    | 0    | 0    | 1    | 0    | 0    | 0    | 0    | 1    | 0         | 0    | 0    | 0    | 0    | 0    | 0    | 0    | 0    | 0    | 0    | 0    | 0    | 0    | 0    | 0    | 0    | 0    | 0 | 0 | 0 | 0 |   |
| IP100106847       | Isoform GTBP-alt of DNA mismatch repair protein MSH6 | S 549  | 100% (1,000.00)          | 1.0000                                | 0         | * 1       | 0      | 0    | 0    | 0    | 0    | 0    | 0    | 0    | 0    | 0    | 0    | 0    | 0    | 0    | 0    | 0    | 0    | 0    | 0         | 0    | 0    | 0    | 0    | 0    | 0    | 0    | 0    | 0    | 0    | 0    | 0    | 0    | 0    | 0    | 0    | 0    | 0 | 0 | 0 | 0 |   |
| IP100106847       | Isoform GTBP-alt of DNA mismatch repair protein MSH6 | S 550  | 100% (1,000.00)          | 1.0000                                | 0         | * 1       | 0      | 0    | 0    | 0    | 0    | 0    | 0    | 0    | 0    | 0    | 0    | 0    | 0    | 0    | 0    | 0    | 0    | 0    | 0         | 0    | 0    | 0    | 0    | 0    | 0    | 0    | 0    | 0    | 0    | 0    | 0    | 0    | 0    | 0    | 0    | 0    | 0 | 0 | 0 | 0 |   |
| IP100106847       | Isoform GTBP-alt of DNA mismatch repair protein MSH6 | S 884  | 100% (1,000.00)          | 1.0000                                | * 1       | 0         | 0      | 0    | 0    | 0    | 0    | 0    | 0    | 0    | 0    | 0    | 0    | 0    | 1    | 0    | 0    | 0    | 0    | 0    | 0         | 0    | 0    | 0    | 0    | 0    | 0    | 0    | 0    | 0    | 0    | 0    | 0    | 0    | 0    | 0    | 0    | 0    | 0 | 0 | 0 | 0 |   |
| IP100106928       | protein tyrosine phosphatase, non-receptor type 2    | S 304  | 100% (52.05)             | 1.0000                                | * 12      | * 12      | 0      | 0    | 0    | 4    | 0    | 0    | 0    | 0    | 0    | 4    | 0    | 0    | 0    | 0    | 0    | 4    | 0    | 0    | 0         | 1    | 4    | 0    | 0    | 0    | 1    | 4    | 0    | 0    | 0    | 0    | 0    | 0    | 0    | 0    | 0    | 0    | 0 | 0 | 0 | 0 |   |
| IP100107104       | Chromosome X open reading frame 26                   | S 197  | 100% (1,000.00)          | 1.0000                                | * 11      | * 8       | 0      | 0    | 0    | 3    | 1    | 0    | 0    | 0    | 0    | 2    | 1    | 0    | 0    | 0    | 0    | 2    | 2    | 0    | 0         | 0    | 0    | 0    | 4    | 0    | 0    | 2    | 0    | 0    | 0    | 0    | 0    | 0    | 0    | 0    | 0    | 0    | 0 | 0 | 0 | 0 | 0 |
| IP100107357       | CLPTM1 protein                                       | S 93   | 100% (1,000.00)          | 1.0000                                | * 7       | * 7       | 0      |      |      |      |      |      |      |      |      |      |      |      |      |      |      |      |      |      |           |      |      |      |      |      |      |      |      |      |      |      |      |      |      |      |      |      |   |   |   |   |   |

Supplemental Table 3. A list of phosphorylation sites and their counts in SNU216 and SNU216-LR.

| Protein accession | Protein name                                         | Site   | Best Ascore <sup>1</sup> | Localization Probability <sup>2</sup> | Total No. |           | SNU216 |      |      |      |      |      |      |      |      |      |      |      |      |      |      |      |      |      | SNU216-LR |      |      |      |      |      |      |      |      |      |      |      |      |      |      |      |      |      |   |   |
|-------------------|------------------------------------------------------|--------|--------------------------|---------------------------------------|-----------|-----------|--------|------|------|------|------|------|------|------|------|------|------|------|------|------|------|------|------|------|-----------|------|------|------|------|------|------|------|------|------|------|------|------|------|------|------|------|------|---|---|
|                   |                                                      |        |                          |                                       | SNU 216   | SNU 216LR | 1_01   | 2_01 | 3_01 | 4_01 | 5_01 | 6_01 | 1_02 | 2_02 | 3_02 | 4_02 | 5_02 | 6_02 | 1_03 | 2_03 | 3_03 | 4_03 | 5_03 | 6_03 | 1_01      | 2_01 | 3_01 | 4_01 | 5_01 | 6_01 | 1_02 | 2_02 | 3_02 | 4_02 | 5_02 | 6_02 | 1_03 | 2_03 | 3_03 | 4_03 | 5_03 | 6_03 |   |   |
| IP100161085       | Isoform 1 of Nucleolar protein 8                     | S 1089 | 100% (93.60)             | 1.0000                                | 2         | 2         | 0      | 0    | 0    | 0    | 0    | 0    | 1    | 0    | 0    | 0    | 0    | 0    | 0    | 0    | 0    | 0    | 0    | 0    | 0         | 0    | 0    | 0    | 0    | 0    | 0    | 0    | 0    | 0    | 0    | 0    | 0    | 0    | 0    | 0    | 0    | 0    | 0 | 0 |
| IP100161085       | Isoform 1 of Nucleolar protein 8                     | S 1090 | 100% (102.87)            | 1.0000                                | 2         | 2         | 0      | 0    | 0    | 0    | 0    | 0    | 1    | 0    | 0    | 0    | 0    | 0    | 0    | 0    | 0    | 0    | 0    | 0    | 0         | 0    | 0    | 0    | 0    | 0    | 0    | 0    | 0    | 0    | 0    | 0    | 0    | 0    | 0    | 0    | 0    | 0    | 0 | 0 |
| IP100162549       | SP110 nuclear body protein isoform c                 | S 256  | 100% (174.21)            | 1.0000                                | 4         | 5         | 0      | 0    | 2    | 0    | 0    | 0    | 0    | 0    | 0    | 1    | 0    | 0    | 0    | 0    | 0    | 0    | 0    | 0    | 0         | 0    | 0    | 0    | 0    | 0    | 0    | 0    | 0    | 0    | 0    | 0    | 0    | 0    | 0    | 0    | 0    | 0    | 0 | 0 |
| IP100162549       | SP110 nuclear body protein isoform c                 | S 380  | 100% (50.40)             | 1.0000                                | 7         | 6         | 0      | 0    | 0    | 3    | 0    | 0    | 0    | 0    | 0    | 3    | 0    | 0    | 0    | 0    | 0    | 0    | 0    | 0    | 0         | 0    | 0    | 0    | 0    | 0    | 0    | 0    | 0    | 0    | 0    | 0    | 0    | 0    | 0    | 0    | 0    | 0    | 0 | 0 |
| IP100163505       | Isoform 1 of RNA-binding region-containing protein 2 | S 136  | 100% (107.01)            | 1.0000                                | 27        | 24        | 2      | 2    | 2    | 2    | 2    | 1    | 2    | 2    | 2    | 1    | 2    | 1    | 2    | 1    | 2    | 1    | 2    | 1    | 0         | 0    | 0    | 0    | 0    | 0    | 0    | 0    | 0    | 0    | 0    | 0    | 0    | 0    | 0    | 0    | 0    | 0    | 0 | 0 |
| IP100163516       | Isoform 1 of Formin-like 1 protein                   | S 624  | 100% (1,000.00)          | 1.0000                                | 1         | 1         | 0      | 1    | 0    | 0    | 0    | 0    | 0    | 0    | 0    | 0    | 0    | 0    | 0    | 0    | 0    | 0    | 0    | 0    | 0         | 0    | 0    | 0    | 0    | 0    | 0    | 0    | 0    | 0    | 0    | 0    | 0    | 0    | 0    | 0    | 0    | 0    | 0 | 0 |
| IP100163516       | Isoform 1 of Formin-like 1 protein                   | S 1031 | 100% (42.06)             | 1.0000                                | 3         | 1         | 0      | 1    | 0    | 0    | 0    | 0    | 0    | 0    | 0    | 0    | 0    | 0    | 0    | 0    | 0    | 0    | 0    | 0    | 0         | 0    | 0    | 0    | 0    | 0    | 0    | 0    | 0    | 0    | 0    | 0    | 0    | 0    | 0    | 0    | 0    | 0    | 0 | 0 |
| IP100163849       | Epidermal growth factor receptor substrate 15-like 1 | S 593  | 100% (1,000.00)          | 1.0000                                | 0         | 1         | 0      | 0    | 0    | 0    | 0    | 0    | 0    | 0    | 0    | 0    | 0    | 0    | 0    | 0    | 0    | 0    | 0    | 0    | 0         | 0    | 0    | 0    | 0    | 0    | 0    | 0    | 0    | 0    | 0    | 0    | 0    | 0    | 0    | 0    | 0    | 0    | 0 | 0 |
| IP100164246       | MSTP055                                              | S 336  | 100% (49.79)             | 1.0000                                | 3         | 3         | 0      | 1    | 0    | 0    | 0    | 0    | 0    | 0    | 0    | 0    | 0    | 0    | 0    | 0    | 0    | 0    | 0    | 0    | 0         | 0    | 0    | 0    | 0    | 0    | 0    | 0    | 0    | 0    | 0    | 0    | 0    | 0    | 0    | 0    | 0    | 0    | 0 | 0 |
| IP100164861       | KINESIN-13A1                                         | S 2    | 100% (1,000.00)          | 1.0000                                | 0         | 1         | 0      | 0    | 0    | 0    | 0    | 0    | 0    | 0    | 0    | 0    | 0    | 0    | 0    | 0    | 0    | 0    | 0    | 0    | 0         | 0    | 0    | 0    | 0    | 0    | 0    | 0    | 0    | 0    | 0    | 0    | 0    | 0    | 0    | 0    | 0    | 0    | 0 | 0 |
| IP100165138       | GRIP and coiled-coil domain-containing protein 1     | S 201  | 100% (1,000.00)          | 1.0000                                | 0         | 1         | 0      | 0    | 0    | 0    | 0    | 0    | 0    | 0    | 0    | 0    | 0    | 0    | 0    | 0    | 0    | 0    | 0    | 0    | 0         | 0    | 0    | 0    | 0    | 0    | 0    | 0    | 0    | 0    | 0    | 0    | 0    | 0    | 0    | 0    | 0    | 0    | 0 | 0 |
| IP100165171       | DGCR14 protein                                       | S 292  | 100% (1,000.00)          | 1.0000                                | 3         |           |        |      |      |      |      |      |      |      |      |      |      |      |      |      |      |      |      |      |           |      |      |      |      |      |      |      |      |      |      |      |      |      |      |      |      |      |   |   |



Supplemental Table 3. A list of phosphorylation sites and their counts in SNU216 and SNU216-LR.

| Protein accession | Protein name                                                       | Site   | Best Ascore <sup>1</sup> | Localization Probability <sup>2</sup> | Total No. |    | SNU216  |           |      |      |      |      |      |      |      |      |      |      |      |      |      |      | SNU216-LR |      |      |      |      |      |      |      |      |      |      |      |      |      |      |      |      |      |      |      |      |      |   |
|-------------------|--------------------------------------------------------------------|--------|--------------------------|---------------------------------------|-----------|----|---------|-----------|------|------|------|------|------|------|------|------|------|------|------|------|------|------|-----------|------|------|------|------|------|------|------|------|------|------|------|------|------|------|------|------|------|------|------|------|------|---|
|                   |                                                                    |        |                          |                                       |           |    | SNU 216 | SNU 216LR | 1_01 | 2_01 | 3_01 | 4_01 | 5_01 | 6_01 | 1_02 | 2_02 | 3_02 | 4_02 | 5_02 | 6_02 | 1_03 | 2_03 | 3_03      | 4_03 | 5_03 | 6_03 | 1_01 | 2_01 | 3_01 | 4_01 | 5_01 | 6_01 | 1_02 | 2_02 | 3_02 | 4_02 | 5_02 | 6_02 | 1_03 | 2_03 | 3_03 | 4_03 | 5_03 | 6_03 |   |
| IPI00216592       | Isoform C1 of Heterogeneous nuclear ribonucleoproteins C1/C2       | S 286  | 100% (52.59)             | 1.0000                                | 20        | 23 | 1       | 1         | 1    | 4    | 0    | 0    | 1    | 1    | 0    | 3    | 0    | 0    | 1    | 1    | 1    | 4    | 1         | 0    | 0    | 0    | 0    | 0    | 0    | 2    | 3    | 1    | 0    | 1    | 0    | 2    | 4    | 1    | 0    | 0    | 1    | 3    | 4    | 1    | 0 |
| IPI00216622       | Isoform 2 of Actin-like protein 6A                                 | S 191  | 100% (1,000.00)          | 1.0000                                | 2         | 4  | 0       | 0         | 0    | 1    | 0    | 0    | 0    | 0    | 0    | 0    | 0    | 0    | 0    | 0    | 0    | 0    | 1         | 0    | 0    | 0    | 0    | 0    | 1    | 2    | 0    | 0    | 0    | 0    | 0    | 0    | 0    | 0    | 0    | 0    | 0    | 1    | 0    | 0    |   |
| IPI00216633       | Isoform Short of Dematin                                           | S 226  | 100% (1,000.00)          | 1.0000                                | 3         | 2  | 0       | 0         | 0    | 1    | 0    | 0    | 0    | 0    | 0    | 0    | 2    | 0    | 0    | 0    | 0    | 0    | 0         | 0    | 0    | 0    | 0    | 0    | 0    | 1    | 0    | 0    | 0    | 0    | 0    | 0    | 0    | 0    | 0    | 0    | 0    | 0    | 1    | 0    | 0 |
| IPI00216654       | Isoform Beta of Nucleolar phosphoprotein p130                      | S 407  | 100% (1,000.00)          | 1.0000                                | 3         | 4  | 0       | 1         | 0    | 0    | 0    | 0    | 1    | 0    | 0    | 0    | 0    | 0    | 0    | 0    | 0    | 1    | 0         | 0    | 0    | 0    | 1    | 1    | 0    | 0    | 0    | 0    | 0    | 1    | 0    | 0    | 0    | 0    | 0    | 1    | 0    | 0    | 0    | 0    |   |
| IPI00216654       | Isoform Beta of Nucleolar phosphoprotein p130                      | S 573  | 100% (1,000.00)          | 1.0000                                | 2         | 1  | 0       | 1         | 0    | 0    | 0    | 0    | 0    | 0    | 1    | 0    | 0    | 0    | 0    | 0    | 0    | 0    | 0         | 0    | 0    | 0    | 0    | 1    | 0    | 0    | 0    | 0    | 0    | 0    | 0    | 0    | 0    | 0    | 0    | 0    | 0    | 0    | 0    | 0    |   |
| IPI00216654       | Isoform Beta of Nucleolar phosphoprotein p130                      | S 653  | 100% (1,000.00)          | 1.0000                                | 2         | 6  | 0       | 0         | 1    | 0    | 0    | 0    | 0    | 0    | 1    | 0    | 0    | 0    | 0    | 0    | 0    | 0    | 0         | 0    | 0    | 0    | 0    | 1    | 0    | 0    | 0    | 0    | 0    | 1    | 1    | 0    | 0    | 0    | 0    | 0    | 2    | 1    | 0    | 0    | 0 |
| IPI00216695       | Isoform 2 of Bromodomain adjacent to zinc finger domain protein 1B | S 1143 | 100% (1,000.00)          | 1.0000                                | 1         | 0  | 0       | 0         | 0    | 0    | 0    | 0    | 0    | 0    | 0    | 0    | 1    | 0    | 0    | 0    | 0    | 0    | 0         | 0    | 0    | 0    | 0    | 0    | 0    | 0    | 0    | 0    | 0    | 0    | 0    | 0    | 0    | 0    | 0    | 0    | 0    | 0    | 0    | 0    |   |
| IPI00216695       | Isoform 2 of Bromodomain adjacent to zinc finger domain protein 1B | S 1464 | 100% (79.03)             | 1.0000                                | 19        | 16 | 2       | 1         | 1    | 0    | 1    | 0    | 3    | 1    | 1    | 0    | 1    | 1    | 3    | 1    | 1    | 1    | 1         | 0    | 3    | 1    | 1    | 1    | 1    | 0    | 0    | 2    | 0    | 1    | 0    | 1    | 1    | 2    | 0    | 1    | 0    | 1    | 1    |      |   |
| IPI00216919       | YAP1 protein                                                       | S 289  | 100% (101.40)            | 1.0000                                | 2         | 3  | 0       | 0         | 1    | 0    | 0    | 0    | 0    | 0    | 1    | 0    | 0    | 0    | 0    | 0    | 0    | 0    | 0         | 0    | 0    | 0    | 0    | 0    | 1    | 0    | 0    | 0    | 0    | 0    | 1    | 0    | 0    | 0    | 0    | 0    | 1    | 0    | 0    | 0    |   |
| IPI00216952       | Isoform C of Lamin-A/C                                             | S 458  | 100% (79.02)             | 1.0000                                | 8         | 8  | 0       | 1         | 2    | 0    | 0    | 0    | 0    | 0    | 1    | 2    | 0    | 0    | 0    | 0    | 0    | 0    | 0         | 0    | 0    | 0    | 1    | 2    | 0    | 0    | 0    | 0    | 0    | 1    | 1    | 0    | 0    | 0    | 0    | 1    | 2    | 0    | 0    | 0    |   |
| IPI00216952       | Isoform C of Lamin-A/C                                             | S 463  | 100% (53.37)             | 1.0000                                | 0         | 3  | 0       | 0         | 0    | 0    | 0    | 0    | 0    | 0    | 0    | 0    | 0    | 0    | 0    | 0    | 0    | 0    | 0         | 0    | 0    | 0    | 0    | 1    | 0    | 0    | 0    | 0    | 0    | 1    | 0    | 0    | 0    | 0    | 0    | 0    | 1    | 0    | 0    | 0    |   |
| IPI00217223       | Multifunctional protein ADE2                                       | S 53   | 100% (81.69)             | 1.0000                                | 9         | 12 | 0       | 0         | 0    | 3    | 0    | 0    | 0    | 0    | 0    | 3    | 0    | 0    | 0    | 0    | 0    | 0    | 0         | 3    | 0    | 0    | 0    | 0    | 0    | 0    | 3    | 0    | 0    | 0    | 1    | 3    | 0    | 0    | 0    | 0    | 1    | 4    | 0    | 0    |   |
| IPI00217240       | WD-repeat protein 75                                               | S 779  | 100% (66.06)             | 1.0000                                | 6         | 5  | 0       | 0         | 0    | 0    | 0    | 0    | 0    | 1    | 1    | 0    | 0    | 0    | 0    | 3    | 1    | 0    | 0         | 0    | 0    | 0    | 1    | 1    | 0    | 0    | 0    | 0    | 1    | 1    | 0    | 0    | 0    | 0    | 1    | 0    | 0    | 0    | 0    | 0    |   |
| IPI00217240       | WD-repeat protein 75                                               | S 782  | 100% (73.26)             | 1.0000                                | 6         | 5  | 0       | 0         | 0    | 0    | 0    | 0    | 0    | 1    | 1    | 0    | 0    | 0    | 0    | 3    | 1    | 0    | 0         | 0    | 0    | 0    | 1    | 1    | 0    | 0    | 0    | 0    | 1    | 1    | 0    | 0    | 0    | 0    | 1    | 0    | 0    | 0    | 0    | 0    |   |
| IPI00217466       | Histone H1.3                                                       | S 188  | 100% (1,000.00)          | 1.0000                                | 2         | 0  | 0       | 0         | 0    | 1    | 0    | 0    | 0    | 0    | 0    | 0    | 0    | 0    | 0    | 0    | 0    | 0    | 0         | 0    | 1    | 0    | 0    | 0    | 0    | 0    | 0    | 0    | 0    | 0    | 0    | 0    | 0    | 0    | 0    | 0    | 0    | 0    | 0    | 0    |   |
| IPI00217467       | Histone H1.4                                                       | S 171  | 100% (1,000.00)          | 1.0000                                | 0         | 1  | 0       | 0         | 0    | 0    | 0    | 0    | 0    | 0    | 0    | 0    | 0    | 0    | 0    | 0    | 0    | 0    | 0         | 0    | 0    | 0    | 0    | 0    | 0    | 0    | 0    | 0    | 0    | 0    | 0    | 0    | 0    | 0    | 0    | 1    | 0    | 0    | 0    |      |   |
| IPI00217467       | Histone H1.4                                                       | S 186  | 100% (1,000.00)          | 1.0000                                | 13        | 17 | 0       | 1         | 0    | 3    | 0    | 0    | 0    | 1    | 1    | 1    | 0    | 0    | 0    | 1    | 1    | 1    | 2         | 0    | 0    | 0    | 1    | 1    | 0    | 3    | 0    | 1    | 0    | 0    | 2    | 3    | 0    | 0    | 0    | 1    | 2    | 3    | 0    | 0    |   |
| IPI00217468       | Histone H1.5                                                       | S 172  | 100% (1,000.00)          | 1.0000                                | 0         | 1  | 0       | 0         | 0    | 0    | 0    | 0    | 0    | 0    | 0    | 0    | 0    | 0    | 0    | 0    | 0    | 0    | 0         | 0    | 0    | 0    | 0    | 0    | 0    | 0    | 0    | 0    | 0    | 0    | 0    | 0    | 0    | 0    | 0    | 0    | 0    | 0    | 0    | 0    |   |
| IPI00217541       | ATP-dependent RNA helicase DDX51                                   | S 83   | 100% (1,000.00)          | 1.0000                                | 16        | 12 | 0       | 1         | 1    | 1    | 0    | 0    | 0    | 2    | 1    | 2    | 0    | 0    | 1    | 2    | 5    | 0    | 0         | 0    | 0    | 1    | 3    | 1    | 0    | 0    | 0    | 0    | 1    | 2    | 0    | 0    | 0    | 0    | 0    | 2    | 2    | 0    | 0    | 0    |   |
| IPI00217626       | IMP dehydrogenase/GMP reductase family protein                     | S 278  | 100% (50.50)             | 1.0000                                | 6         | 4  | 0       | 1         | 0    | 0    | 0    | 0    | 0    | 1    | 1    | 0    | 0    | 0    | 0    | 1    | 2    | 0    | 0         | 0    | 0    | 1    | 1    | 0    | 0    | 0    | 0    | 0    | 0    | 0    | 0    | 0    | 0    | 0    | 0    | 2    | 0    | 0    | 0    | 0    |   |
| IPI00217626       | IMP dehydrogenase/GMP reductase family protein                     | S 280  | 100% (57.29)             | 1.0000                                | 9         | 10 | 1       | 3         | 0    | 0    | 0    | 0    | 0    | 0    | 2    | 0    | 0    | 0    | 0    | 2    | 1    | 0    | 0         | 0    | 0    | 2    | 3    | 0    | 0    | 0    | 0    | 1    | 1    | 0    | 0    | 0    | 0    | 0    | 1    | 2    | 0    | 0    | 0    | 0    |   |
| IPI00217626       |                                                                    |        |                          |                                       |           |    |         |           |      |      |      |      |      |      |      |      |      |      |      |      |      |      |           |      |      |      |      |      |      |      |      |      |      |      |      |      |      |      |      |      |      |      |      |      |   |

Supplemental Table 3. A list of phosphorylation sites and their counts in SNU216 and SNU216-LR.

| Protein accession | Protein name                                                      | Site   | Best Ascore <sup>1</sup> | Localization Probability <sup>2</sup> | Total No. |      | SNU216  |           |      |      |      |      |      |      |      |      |      |      |      |      |      |      | SNU216-LR |      |      |      |      |      |      |      |      |      |      |      |      |      |      |      |      |      |      |      |      |      |   |   |   |   |
|-------------------|-------------------------------------------------------------------|--------|--------------------------|---------------------------------------|-----------|------|---------|-----------|------|------|------|------|------|------|------|------|------|------|------|------|------|------|-----------|------|------|------|------|------|------|------|------|------|------|------|------|------|------|------|------|------|------|------|------|------|---|---|---|---|
|                   |                                                                   |        |                          |                                       |           |      | SNU 216 | SNU 216LR | 1_01 | 2_01 | 3_01 | 4_01 | 5_01 | 6_01 | 1_02 | 2_02 | 3_02 | 4_02 | 5_02 | 6_02 | 1_03 | 2_03 | 3_03      | 4_03 | 5_03 | 6_03 | 1_01 | 2_01 | 3_01 | 4_01 | 5_01 | 6_01 | 1_02 | 2_02 | 3_02 | 4_02 | 5_02 | 6_02 | 1_03 | 2_03 | 3_03 | 4_03 | 5_03 | 6_03 |   |   |   |   |
| IPI00218754       | Isoform 4 of DNA topoisomerase 2-alpha                            | S 1435 | 100% (78.62)             | 1.0000                                | * 1       | * 3  | 1       | 0         | 0    | 0    | 0    | 0    | 0    | 0    | 0    | 0    | 0    | 0    | 0    | 0    | 0    | 0    | 0         | 0    | 0    | 0    | 2    | 0    | 0    | 0    | 0    | 0    | 0    | 0    | 0    | 0    | 0    | 0    | 0    | 0    | 0    | 0    | 0    | 0    | 0 | 0 | 0 |   |
| IPI00218754       | Isoform 4 of DNA topoisomerase 2-alpha                            | S 1455 | 100% (1,000.00)          | 1.0000                                | * 5       | * 6  | 2       | 0         | 0    | 0    | 0    | 0    | 0    | 2    | 0    | 0    | 0    | 0    | 0    | 0    | 0    | 1    | 0         | 0    | 0    | 0    | 2    | 0    | 0    | 0    | 0    | 0    | 0    | 0    | 0    | 0    | 0    | 0    | 0    | 0    | 0    | 0    | 0    | 0    | 0 | 0 | 0 | 0 |
| IPI00218754       | Isoform 4 of DNA topoisomerase 2-alpha                            | S 1458 | 100% (1,000.00)          | 1.0000                                | * 12      | * 15 | 4       | 1         | 0    | 0    | 0    | 0    | 4    | 0    | 0    | 0    | 0    | 0    | 0    | 0    | 2    | 1    | 0         | 0    | 0    | 0    | 3    | 1    | 0    | 0    | 0    | 0    | 5    | 1    | 0    | 0    | 0    | 0    | 0    | 0    | 0    | 4    | 1    | 0    | 0 | 0 | 0 |   |
| IPI00218754       | Isoform 4 of DNA topoisomerase 2-alpha                            | S 1585 | 100% (65.16)             | 1.0000                                | 0         | * 3  | 0       | 0         | 0    | 0    | 0    | 0    | 0    | 0    | 0    | 0    | 0    | 0    | 0    | 0    | 0    | 0    | 0         | 0    | 0    | 0    | 2    | 0    | 0    | 0    | 0    | 0    | 1    | 0    | 0    | 0    | 0    | 0    | 0    | 0    | 0    | 0    | 0    | 0    | 0 | 0 | 0 |   |
| IPI00218788       | Isoform PTPA of Tyrosine-protein phosphatase non-receptor type 2  | S 304  | 100% (52.05)             | 1.0000                                | * 12      | * 12 | 0       | 0         | 0    | 4    | 0    | 0    | 0    | 0    | 0    | 0    | 4    | 0    | 0    | 0    | 0    | 0    | 0         | 0    | 4    | 0    | 0    | 0    | 0    | 1    | 4    | 0    | 0    | 0    | 0    | 1    | 4    | 0    | 0    | 0    | 0    | 0    | 0    | 0    | 2 | 0 | 0 |   |
| IPI00218823       | Isoform 1 of Myeloid/lymphoid or mixed-lineage leukemia protein 4 | S 844  | 100% (58.59)             | 1.0000                                | * 3       | * 3  | 1       | 0         | 0    | 0    | 0    | 0    | 0    | 0    | 0    | 0    | 0    | 0    | 0    | 0    | 2    | 0    | 0         | 0    | 0    | 0    | 1    | 0    | 0    | 0    | 0    | 0    | 1    | 0    | 0    | 0    | 0    | 0    | 0    | 0    | 0    | 0    | 0    | 0    | 0 | 0 | 0 |   |
| IPI00218853       | Isoform 2 of Double-strand break repair protein MRE11A            | S 660  | 100% (123.96)            | 1.0000                                | * 3       | * 3  | 0       | 2         | 0    | 0    | 0    | 0    | 0    | 0    | 0    | 0    | 0    | 0    | 0    | 0    | 0    | 0    | 1         | 0    | 0    | 0    | 0    | 2    | 0    | 0    | 0    | 0    | 0    | 1    | 0    | 0    | 0    | 0    | 0    | 0    | 0    | 0    | 0    | 0    | 0 | 0 | 0 |   |
| IPI00218853       | Isoform 2 of Double-strand break repair protein MRE11A            | S 661  | 100% (129.29)            | 1.0000                                | * 1       | * 1  | 0       | 1         | 0    | 0    | 0    | 0    | 0    | 0    | 0    | 0    | 0    | 0    | 0    | 0    | 0    | 0    | 0         | 0    | 0    | 0    | 0    | 1    | 0    | 0    | 0    | 0    | 0    | 0    | 0    | 0    | 0    | 0    | 0    | 0    | 0    | 0    | 0    | 0    | 0 | 0 | 0 |   |
| IPI00218936       | Isoform AML-1A of Runt-related transcription factor 1             | S 212  | 100% (60.33)             | 1.0000                                | * 10      | *    |         |           |      |      |      |      |      |      |      |      |      |      |      |      |      |      |           |      |      |      |      |      |      |      |      |      |      |      |      |      |      |      |      |      |      |      |      |      |   |   |   |   |







Supplemental Table 3. A list of phosphorylation sites and their counts in SNU216 and SNU216-LR.

| Protein accession | Protein name                              | Site   | Best Ascore <sup>1</sup> | Localization Probability <sup>2</sup> | Total No. |    | SNU216  |           |      |      |      |      |      |      |      |      |      |      |      |      |      |      |      |      | SNU216-LR |      |      |      |      |      |      |      |      |      |      |      |      |      |      |      |      |      |      |
|-------------------|-------------------------------------------|--------|--------------------------|---------------------------------------|-----------|----|---------|-----------|------|------|------|------|------|------|------|------|------|------|------|------|------|------|------|------|-----------|------|------|------|------|------|------|------|------|------|------|------|------|------|------|------|------|------|------|
|                   |                                           |        |                          |                                       |           |    | SNU 216 | SNU 216LR | 1_01 | 2_01 | 3_01 | 4_01 | 5_01 | 6_01 | 1_02 | 2_02 | 3_02 | 4_02 | 5_02 | 6_02 | 1_03 | 2_03 | 3_03 | 4_03 | 5_03      | 6_03 | 1_01 | 2_01 | 3_01 | 4_01 | 5_01 | 6_01 | 1_02 | 2_02 | 3_02 | 4_02 | 5_02 | 6_02 | 1_03 | 2_03 | 3_03 | 4_03 | 5_03 |
| IPI00304589       | 182 kDa tankyrase 1-binding protein       | S 1620 | 100% (176.81)            | 1.0000                                | 18        | 24 | 2       | 2         | 1    | 1    | 1    | 0    | 2    | 1    | 1    | 1    | 1    | 1    | 0    | 1    | 1    | 1    | 1    | 1    | 0         | 4    | 2    | 2    | 2    | 1    | 0    | 2    | 2    | 1    | 1    | 0    | 0    | 1    | 3    | 2    | 1    | 0    | 0    |
| IPI00304589       | 182 kDa tankyrase 1-binding protein       | S 1621 | 100% (156.02)            | 1.0000                                | 20        | 23 | 3       | 2         | 1    | 1    | 1    | 0    | 3    | 1    | 1    | 1    | 1    | 0    | 1    | 1    | 1    | 1    | 1    | 0    | 3         | 2    | 2    | 2    | 1    | 0    | 2    | 2    | 1    | 1    | 0    | 0    | 1    | 3    | 2    | 1    | 0    | 0    |      |
| IPI00304589       | 182 kDa tankyrase 1-binding protein       | S 1666 | 100% (138.31)            | 1.0000                                | 19        | 19 | 3       | 2         | 1    | 0    | 1    | 1    | 1    | 1    | 1    | 0    | 1    | 1    | 2    | 2    | 1    | 0    | 0    | 1    | 2         | 2    | 1    | 0    | 2    | 0    | 2    | 2    | 1    | 0    | 1    | 0    | 1    | 2    | 0    | 0    | 2    | 1    |      |
| IPI00304692       | Heterogeneous nuclear ribonucleoprotein G | S 352  | 100% (1,000.00)          | 1.0000                                | 9         | 15 | 0       | 0         | 0    | 0    | 4    | 0    | 0    | 0    | 0    | 0    | 2    | 0    | 0    | 0    | 0    | 0    | 0    | 3    | 0         | 0    | 0    | 0    | 4    | 4    | 0    | 0    | 0    | 0    | 2    | 1    | 0    | 0    | 0    | 3    | 1    | 0    | 0    |
| IPI00304740       | Isoform 1 of Intersectin-1                | S 1306 | 100% (1,000.00)          | 1.0000                                | 1         | 0  | 0       | 0         | 0    | 0    | 0    | 0    | 0    | 0    | 0    | 0    | 0    | 0    | 0    | 0    | 0    | 0    | 0    | 0    | 1         | 0    | 0    | 0    | 0    | 0    | 0    | 0    | 0    | 0    | 0    | 0    | 0    | 0    | 0    | 0    | 0    | 0    |      |
| IPI00304742       | Serine/threonine-protein kinase 10        | S 438  | 100% (1,000.00)          | 1.0000                                | 3         | 2  | 0       | 1         | 0    | 0    | 0    | 0    | 0    | 1    | 0    | 0    | 0    | 0    | 0    | 0    | 0    | 1    | 0    | 0    | 0         | 0    | 1    | 0    | 0    | 0    | 0    | 0    | 0    | 0    | 0    | 0    | 0    | 0    | 0    | 1    | 0    | 0    | 0    |
| IPI00304875       | Isoform 1 of HIRA-interacting protein 3   | S 125  | 100% (1,000.00)          | 1.0000                                | 2         | 2  | 0       | 0         | 1    | 0    | 0    | 0    | 0    | 0    | 0    | 0    | 0    | 0    | 0    | 0    | 0    | 0    | 1    | 0    | 0         | 0    | 0    | 1    | 0    | 0    | 0    | 0    | 0    | 0    | 0    | 1    | 0    | 0    | 0    | 0    | 0    | 0    | 0    |
| IPI00304875       | Isoform 1 of HIRA-interacting protein 3   | S 142  | 100% (1,000.00)          | 1.0000                                | 1         | 0  | 0       | 0         | 0    | 0    | 0    | 0    | 0    | 0    | 1    | 0    | 0    | 0    | 0    | 0    | 0    | 0    | 0    | 0    | 0         | 0    | 0    | 0    | 0    | 0    | 0    | 0    | 0    | 0    | 0    | 0    | 0    | 0    | 0    | 0    | 0    | 0    |      |
| IPI00304875       | Isoform 1 of HIRA-interacting protein 3   | S 143  | 100% (1,000.00)          | 1.0000                                | 1         | 0  | 0       | 0         | 0    | 0    | 0    | 0    | 0    | 1    | 0    | 0    | 0    | 0    | 0    | 0    | 0    | 0    | 0    | 0    | 0         | 0    | 0    | 0    | 0    | 0    | 0    | 0    | 0    | 0    | 0    | 0    | 0    | 0    | 0    | 0    | 0    | 0    |      |
| IPI00304875       | Isoform 1 of HIRA-interacting protein 3   | S 159  | 100% (43.16)             | 1.0000                                | 7         | 2  | 0       | 0         | 0    | 2    | 0    | 0    | 0    | 0    |      |      |      |      |      |      |      |      |      |      |           |      |      |      |      |      |      |      |      |      |      |      |      |      |      |      |      |      |      |

Supplemental Table 3. A list of phosphorylation sites and their counts in SNU216 and SNU216-LR.

| Protein accession | Protein name                                                      | Site   | Best Ascore <sup>1</sup> | Localization Probability <sup>2</sup> | Total No. |           | SNU216 |      |      |      |      |      |      |      |      |      |      |      |      |      |      |      | SNU216-LR |      |      |      |      |      |      |      |      |      |      |      |      |      |      |      |      |      |      |      |   |   |   |   |
|-------------------|-------------------------------------------------------------------|--------|--------------------------|---------------------------------------|-----------|-----------|--------|------|------|------|------|------|------|------|------|------|------|------|------|------|------|------|-----------|------|------|------|------|------|------|------|------|------|------|------|------|------|------|------|------|------|------|------|---|---|---|---|
|                   |                                                                   |        |                          |                                       | SNU 216   | SNU 216LR | 1_01   | 2_01 | 3_01 | 4_01 | 5_01 | 6_01 | 1_02 | 2_02 | 3_02 | 4_02 | 5_02 | 6_02 | 1_03 | 2_03 | 3_03 | 4_03 | 5_03      | 6_03 | 1_01 | 2_01 | 3_01 | 4_01 | 5_01 | 6_01 | 1_02 | 2_02 | 3_02 | 4_02 | 5_02 | 6_02 | 1_03 | 2_03 | 3_03 | 4_03 | 5_03 | 6_03 |   |   |   |   |
| IP100329115       | Isoform 1 of Protein C10orf47                                     | S 179  | 100% (1,000.00)          | 1.0000                                | +         | 1         | +      | 5    | 0    | 0    | 1    | 0    | 0    | 0    | 0    | 0    | 0    | 0    | 0    | 0    | 0    | 0    | 0         | 0    | 0    | 0    | 0    | 2    | 2    | 0    | 0    | 0    | 0    | 0    | 1    | 0    | 0    | 0    | 0    | 0    | 0    | 0    | 0 | 0 |   |   |
| IP100329291       | Isoform 2 of STAR-related lipid transfer protein 13               | S 381  | 100% (1,000.00)          | 1.0000                                | +         | 3         | 0      | 1    | 1    | 0    | 0    | 0    | 0    | 0    | 0    | 0    | 0    | 0    | 0    | 0    | 1    | 0    | 0         | 0    | 0    | 0    | 0    | 0    | 0    | 0    | 0    | 0    | 0    | 0    | 0    | 0    | 0    | 0    | 0    | 0    | 0    | 0    | 0 | 0 |   |   |
| IP100329547       | Isoform 1 of Zinc finger CCCH-type domain-containing protein 13   | S 64   | 100% (1,000.00)          | 1.0000                                | +         | 1         | +      | 1    | 0    | 0    | 0    | 0    | 0    | 0    | 0    | 0    | 0    | 0    | 0    | 1    | 0    | 0    | 0         | 0    | 0    | 1    | 0    | 0    | 0    | 0    | 0    | 0    | 0    | 0    | 0    | 0    | 0    | 0    | 0    | 0    | 0    | 0    | 0 | 0 |   |   |
| IP100329547       | Isoform 1 of Zinc finger CCCH-type domain-containing protein 13   | S 137  | 100% (60.15)             | 1.0000                                | +         | 1         | +      | 2    | 0    | 0    | 0    | 0    | 0    | 0    | 0    | 0    | 0    | 0    | 0    | 1    | 0    | 0    | 0         | 0    | 0    | 1    | 0    | 0    | 0    | 0    | 0    | 1    | 0    | 0    | 0    | 0    | 0    | 0    | 0    | 0    | 0    | 0    | 0 | 0 |   |   |
| IP100329547       | Isoform 1 of Zinc finger CCCH-type domain-containing protein 13   | S 198  | 100% (1,000.00)          | 1.0000                                | +         | 6         | +      | 5    | 2    | 1    | 0    | 0    | 0    | 2    | 0    | 0    | 0    | 0    | 0    | 1    | 0    | 0    | 0         | 0    | 0    | 1    | 0    | 0    | 0    | 0    | 0    | 1    | 1    | 0    | 0    | 0    | 0    | 1    | 1    | 0    | 0    | 0    | 0 | 0 |   |   |
| IP100329547       | Isoform 1 of Zinc finger CCCH-type domain-containing protein 13   | S 265  | 100% (1,000.00)          | 1.0000                                | +         | 22        | +      | 16   | 7    | 1    | 0    | 0    | 0    | 6    | 0    | 0    | 0    | 0    | 0    | 8    | 0    | 0    | 0         | 0    | 0    | 6    | 0    | 0    | 0    | 0    | 0    | 5    | 0    | 0    | 0    | 0    | 5    | 0    | 0    | 0    | 0    | 0    | 0 | 0 |   |   |
| IP100329547       | Isoform 1 of Zinc finger CCCH-type domain-containing protein 13   | S 831  | 100% (1,000.00)          | 1.0000                                | +         | 4         | +      | 4    | 2    | 0    | 0    | 0    | 0    | 1    | 0    | 0    | 0    | 0    | 0    | 1    | 0    | 0    | 0         | 0    | 1    | 0    | 0    | 0    | 0    | 0    | 0    | 2    | 0    | 0    | 0    | 0    | 0    | 0    | 1    | 0    | 0    | 0    | 0 | 0 |   |   |
| IP100329547       | Isoform 1 of Zinc finger CCCH-type domain-containing protein 13   | S 833  | 100% (1,000.00)          | 1.0000                                | +         | 4         | +      | 4    | 2    | 0    | 0    | 0    | 0    | 0    | 1    | 0    | 0    | 0    | 0    | 1    | 0    | 0    | 0         | 0    | 1    | 0    | 0    | 0    | 0    | 0    | 0    | 2    | 0    | 0    | 0    | 0    | 0    | 0    | 1    | 0    | 0    | 0    | 0 | 0 |   |   |
| IP100329547       | Isoform 1 of Zinc finger CCCH-type domain-containing protein 13   | S 837  | 100% (1,000.00)          | 1.0000                                | +         | 4         | +      | 4    | 2    | 0    | 0    | 0    | 0    | 1    | 0    | 0    | 0    | 0    | 0    | 1    | 0    | 0    | 0         | 0    | 1    | 0    | 0    | 0    | 0    | 0    | 1    | 0    | 0    | 0    | 0    | 2    | 0    | 0    | 0    | 0    | 1    | 0    | 0 | 0 |   |   |
| IP100329547       | Isoform 1 of Zinc finger CCCH-type domain-containing protein 13   | S 1010 | 100% (65.86)             | 1.0000                                | +         | 3         | +      | 3    | 1    | 0    | 0    | 0    | 0    | 0    | 1    | 0    | 0    | 0    | 0    | 1    | 0    | 0    | 0         | 0    | 0    | 0    | 0    | 0    | 0    | 0    | 0    | 1    | 0    | 0    | 0    | 0    | 0    | 0    | 0    | 2    | 0    | 0    | 0 | 0 |   |   |
| IP100329547       | Isoform 1 of Zinc finger CCCH-type domain-containing protein 13   | S 1014 | 100% (85.92)             | 1.0000                                | +         | 7         | +      | 1    | 3    | 0    | 0    | 0    | 0    | 2    | 0    | 0    | 0    | 0    | 0    | 2    | 0    | 0    | 0         | 0    | 0    | 0    | 0    | 0    | 0    | 0    | 0    | 0    | 0    | 0    | 0    | 0    | 0    | 1    | 0    | 0    | 0    | 0    | 0 |   |   |   |
| IP100329547       | Isoform 1 of Zinc finger CCCH-type domain-containing protein 13   | S 1017 | 100% (71.29)             | 1.0000                                | +         | 14        | +      | 9    | 5    | 0    | 0    | 0    | 0    | 4    | 1    | 0    | 0    | 0    | 0    | 4    | 0    | 0    | 0         | 0    | 0    | 1    | 0    | 0    | 0    | 0    | 0    | 4    | 0    | 0    | 0    | 0    | 4    | 0    | 0    | 4    | 0    | 0    | 0 | 0 | 0 |   |
| IP100329572       | Protein kinase C and casein kinase substrate in neurons protein 3 | S 276  | 100% (1,000.00)          | 1.0000                                | +         | 2         | +      | 5    | 0    | 0    | 0    | 1    | 0    | 0    | 0    | 0    | 0    | 1    | 0    | 0    | 0    | 0    | 0         | 0    | 0    | 0    | 0    | 0    | 0    | 0    | 0    | 1    | 2    | 0    | 0    | 0    | 0    | 0    | 0    | 0    | 1    | 0    | 0 | 0 |   |   |
| IP100329572       | Protein kinase C and casein kinase substrate in neurons protein 3 | S 320  | 100% (72.78)             | 1.0000                                | +         | 10        | +      | 15   | 0    | 0    | 0    | 3    | 0    | 0    | 0    | 0    | 0    | 3    | 0    | 0    | 0    | 0    | 0         | 1    | 3    | 0    | 0    | 0    | 2    | 3    | 0    | 0    | 0    | 0    | 0    | 2    | 3    | 0    | 0    | 0    | 0    | 2    | 3 | 0 | 0 |   |
| IP100329635       | Isoform 1 of Folliculin                                           | S 62   | 100% (102.87)            | 1.0000                                | +         | 5         | +      | 5    | 0    | 0    | 2    | 0    | 0    | 0    | 0    | 0    | 2    | 0    | 0    | 0    | 0    | 0    | 1         | 0    | 0    | 0    | 0    | 0    | 1    | 0    | 0    | 0    | 0    | 0    | 0    | 2    | 0    | 0    | 0    | 0    | 0    | 2    | 0 | 0 |   |   |
| IP100329692       | Isoform Long of Glycylpeptide N-tetradecanoyltransferase 1        | S 47   | 100% (96.85)             | 1.0000                                | +         | 10        | +      | 11   | 1    | 0    | 2    | 0    | 0    | 0    | 2    | 0    | 1    | 0    | 0    | 2    | 0    | 1    | 1         | 0    | 0    | 1    | 0    | 2    | 0    | 1    | 2    | 0    | 2    | 0    | 0    | 0    | 2    | 0    | 0    | 0    | 2    | 0    | 1 | 0 | 0 |   |
| IP100329694       | Isoform 2 of Golgin subfamily A member 4                          | S 71   | 100% (47.36)             | 1.0000                                | 0         | +         | 2      | 0    | 0    | 0    | 0    | 0    | 0    | 0    | 0    | 0    | 0    | 0    | 0    | 0    | 0    | 0    | 0         | 0    | 0    | 0    | 0    | 0    | 0    | 0    | 1    | 0    | 0    | 0    | 0    | 0    | 0    | 0    | 0    | 0    | 0    | 0    | 0 | 0 |   |   |
| IP100329791       | Probable ATP-dependent RNA helicase DDX46                         | S 804  | 100% (157.58)            | 1.0000                                | +         | 9         | +      | 6    | 1    | 2    | 0    | 0    | 0    | 2    | 1    | 0    | 0    | 0    | 0    | 1    | 2    | 0    | 0         | 0    | 0    | 1    | 2    | 0    | 0    | 0    | 0    | 1    | 2    | 0    | 0    | 0    | 0    | 1    | 0    | 0    | 0    | 1    | 1 | 0 | 0 | 0 |
| IP100332110       | promyelocytic leukemia protein isoform 9                          | S 527  | 100% (59.60)             | 1.0000                                | +         | 2         | +      | 5    | 0    | 1    | 0    | 0    | 0    | 0    | 1    | 0    | 0    | 0    | 0    | 0    | 0    | 0    | 0         | 0    | 0    | 0    | 0    | 0    | 0    | 0    | 1    | 1    | 0    | 0    | 0    | 0    | 0    | 1    | 0    | 0    | 0    | 2    | 0 | 0 | 0 |   |
| IP100332499       | nuclear autoantigenic sperm protein isoform 1                     | S 453  | 100% (40.62)             | 1.0000                                | +         | 6         | +      | 4    | 1    | 2    | 0    | 0    | 0    | 0    | 0    | 2    | 0    | 0    | 0    | 0    | 0    | 1    | 0         | 0    | 0    | 0    | 2    | 0    | 0    | 0    | 0    | 1    | 0    | 0    | 0    | 0    | 0    | 0    | 0    | 0    | 1    | 0    | 0 | 0 | 0 |   |
| IP100332499       | nuclear autoantigenic sperm protein isoform 1                     | S 482  | 100% (1,000.00)          | 1.0000                                | +         | 21        | +      | 18   | 2    | 7    | 0    | 0    | 0    | 0    | 2    | 4    | 0    | 0    | 0    | 0    | 2    | 4    | 0         | 0    | 0    | 2    | 4    | 0    | 0    | 0    | 0    | 1    | 5    | 0    | 0    | 0    | 0    | 0    | 2    | 4    | 0    | 0    | 0 | 0 | 0 |   |
| IP100332499       | nuclear autoantigenic sperm protein isoform 1                     | S 505  | 100% (1,000.00)          | 1.0000                                | +         | 5         | +      | 8    | 0    | 2    | 0    | 0    | 0    | 0    | 0    | 1    | 0    | 0    | 0    | 0    | 2    | 0    | 0         | 0    | 0    | 1    | 2    | 2    | 0    | 0    | 0    | 0    | 2    | 0    | 0    | 0    | 0    | 0    | 0    | 0    | 1    | 0    | 0 | 0 | 0 |   |
| IP100332642       | Isoform 2 of Protein G6orf106                                     | S 149  | 100% (1,000.00)          | 1.0000                                | +         | 3         | +      | 3    | 0    | 0    | 0    | 1    | 0    | 0    | 0    | 0    | 0    | 1    | 0    | 0    | 0    | 0    | 0         | 1    | 0    | 0    | 0    | 0    | 0    | 0    | 0    | 0    | 0    | 0    | 0    | 0    | 1    | 0    | 0    | 0    | 0    | 0    | 1 | 0 | 0 |   |
| IP100333010       | SR-related CTD associated factor 6                                | S 683  | 100% (1,000.00)          | 1.0000                                | +         | 1         | 0      | 1    | 0    | 0    | 0    | 0    | 0    | 0    | 0    | 0    | 0    | 0    | 0    | 0    | 0    | 0    | 0         | 0    | 0    | 0    | 0    | 0    | 0    | 0    | 0    | 0    | 0    | 0    | 0    | 0    | 0    | 0    | 0    | 0    | 0    | 0    | 0 | 0 |   |   |
| IP100333771       | Isoform 5 of Caldesmon                                            | S 196  | 100% (1,000.00)          | 1.0000                                | +         | 25        | +      | 23   | 2    | 2    | 2    | 0    | 0    | 2    | 3    | 2    | 2    | 0    | 0    | 2    | 2    | 2    | 2         | 0    | 0    | 2    | 2    | 3    | 2    | 0    | 0    | 2    | 2    | 3    | 1    | 0    | 0    | 1    | 3    | 2    | 0    | 0    | 0 | 0 |   |   |
| IP100333858       | zinc finger RNA binding protein                                   | S 1054 | 100% (1,000.00)          | 1.0000                                | +         | 21        | +      | 22   | 2    | 2    | 4    | 0    | 0    | 0    | 3    | 1    |      |      |      |      |      |      |           |      |      |      |      |      |      |      |      |      |      |      |      |      |      |      |      |      |      |      |   |   |   |   |

Supplemental Table 3. A list of phosphorylation sites and their counts in SNU216 and SNU216-LR.

| Protein accession | Protein name                                                                                         | Site   | Best Score <sup>1</sup> | Localization Probability <sup>2</sup> | Total No. |           | SNU216 |      |      |      |      |      |      |      |      |      |      |      |      |      |      |      |      |      | SNU216-LR |      |      |      |      |      |      |      |      |      |      |      |      |      |      |      |      |      |   |
|-------------------|------------------------------------------------------------------------------------------------------|--------|-------------------------|---------------------------------------|-----------|-----------|--------|------|------|------|------|------|------|------|------|------|------|------|------|------|------|------|------|------|-----------|------|------|------|------|------|------|------|------|------|------|------|------|------|------|------|------|------|---|
|                   |                                                                                                      |        |                         |                                       | SNU 216   | SNU 216LR | 1_01   | 2_01 | 3_01 | 4_01 | 5_01 | 6_01 | 1_02 | 2_02 | 3_02 | 4_02 | 5_02 | 6_02 | 1_03 | 2_03 | 3_03 | 4_03 | 5_03 | 6_03 | 1_01      | 2_01 | 3_01 | 4_01 | 5_01 | 6_01 | 1_02 | 2_02 | 3_02 | 4_02 | 5_02 | 6_02 | 1_03 | 2_03 | 3_03 | 4_03 | 5_03 | 6_03 |   |
| IP100376199       | Interferon regulatory factor 2 binding protein 2                                                     | S 360  | 100% (1,000.00)         | 1.0000                                | 5         | 13        | 0      | 1    | 0    | 1    | 0    | 0    | 0    | 0    | 0    | 1    | 0    | 0    | 0    | 0    | 1    | 1    | 0    | 0    | 0         | 1    | 1    | 1    | 1    | 0    | 0    | 0    | 1    | 3    | 1    | 0    | 0    | 0    | 1    | 2    | 2    | 0    | 0 |
| IP100376283       | Isoform 2 of Retinoblastoma-binding protein 6                                                        | S 1145 | 100% (85.52)            | 1.0000                                | 9         | 9         | 2      | 1    | 0    | 0    | 0    | 0    | 3    | 0    | 0    | 0    | 0    | 0    | 2    | 1    | 0    | 0    | 0    | 0    | 3         | 0    | 0    | 0    | 0    | 0    | 2    | 0    | 0    | 0    | 0    | 0    | 0    | 4    | 0    | 0    | 0    | 0    |   |
| IP100376283       | Isoform 2 of Retinoblastoma-binding protein 6                                                        | S 1294 | 100% (1,000.00)         | 1.0000                                | 6         | 5         | 2      | 1    | 0    | 0    | 0    | 0    | 1    | 1    | 0    | 0    | 0    | 0    | 1    | 0    | 0    | 0    | 0    | 0    | 0         | 1    | 0    | 0    | 0    | 0    | 0    | 1    | 0    | 0    | 0    | 0    | 0    | 1    | 1    | 0    | 0    | 0    |   |
| IP100376404       | fetal Alzheimer antigen isoform 2                                                                    | S 216  | 100% (1,000.00)         | 1.0000                                | 4         | 3         | 1      | 0    | 0    | 0    | 0    | 0    | 1    | 0    | 0    | 0    | 0    | 0    | 2    | 0    | 0    | 0    | 0    | 0    | 0         | 0    | 0    | 0    | 0    | 0    | 2    | 0    | 0    | 0    | 0    | 0    | 0    | 1    | 0    | 0    | 0    | 0    |   |
| IP100376493       | PHD finger protein 2 isoform b                                                                       | S 625  | 100% (1,000.00)         | 1.0000                                | 4         | 10        | 1      | 0    | 0    | 0    | 0    | 0    | 1    | 2    | 0    | 0    | 0    | 0    | 0    | 0    | 0    | 0    | 0    | 0    | 2         | 2    | 0    | 0    | 0    | 0    | 1    | 2    | 0    | 0    | 0    | 0    | 1    | 2    | 0    | 0    | 0    | 0    |   |
| IP100376933       | HLA-B associated transcript-2 isoform b                                                              | S 342  | 100% (1,000.00)         | 1.0000                                | 15        | 16        | 3      | 2    | 0    | 0    | 0    | 0    | 3    | 3    | 0    | 0    | 0    | 0    | 2    | 2    | 0    | 0    | 0    | 0    | 1         | 1    | 0    | 0    | 0    | 0    | 4    | 3    | 1    | 0    | 0    | 0    | 3    | 2    | 1    | 0    | 0    | 0    |   |
| IP100376933       | HLA-B associated transcript-2 isoform b                                                              | S 350  | 100% (1,000.00)         | 1.0000                                | 15        | 16        | 3      | 2    | 0    | 0    | 0    | 0    | 3    | 3    | 0    | 0    | 0    | 0    | 2    | 2    | 0    | 0    | 0    | 0    | 1         | 1    | 0    | 0    | 0    | 0    | 4    | 3    | 1    | 0    | 0    | 0    | 3    | 2    | 1    | 0    | 0    | 0    |   |
| IP100376976       | Isoform 1 of 130-kDa phosphatidylinositol 4,5-bisphosphate-dependent ARF1 GTPase- activating protein | S 720  | 100% (1,000.00)         | 1.0000                                | 16        | 15        | 1      | 4    | 0    | 0    | 0    | 0    | 0    | 6    | 0    | 0    | 0    | 0    | 1    | 4    | 0    | 0    | 0    | 0    | 0         | 5    | 0    | 0    | 0    | 0    | 2    | 3    | 0    | 0    | 0    | 0    | 1    | 4    | 0    | 0    | 0    | 0    |   |
| IP100376976       | Isoform 1 of 130-kDa phosphatidylinositol 4,5-bisphosphate-dependent ARF1 GTPase- activating protein | S 729  | 100% (1,000.00)         | 1.0000                                | 5         | 7         | 1      | 1    | 0    | 0    | 0    | 0    | 2    | 0    | 0    | 0    | 0    | 0    | 0    | 1    | 0    | 0    | 0    | 0    | 2         | 0    | 0    | 0    | 0    | 1    | 2    | 0    | 0    | 0    | 0    | 0    | 2    | 0    | 0    | 0    | 0    | 0    |   |
| IP100377152       | Isoform 2 of U4/U6 small nuclear ribonucleoprotein Prp3                                              | S 618  | 100% (1,000.00)         | 1.0000                                | 19        | 17        | 3      | 2    | 1    | 0    | 1    | 0    | 1    | 3    | 1    | 0    | 0    | 0    | 2    | 4    | 1    | 0    | 0    | 0    | 2         | 3    | 2    | 1    | 0    | 0    | 1    | 2    | 0    | 0    | 1    | 0    | 1    | 3    | 1    | 0    | 0    | 0    |   |
| IP100377154       | bromodomain adjacent to zinc finger domain, 1B                                                       | S 1147 | 100% (1,000.00)         | 1.0000                                | 1         | 0         | 0      | 0    | 0    | 0    | 0    | 0    | 0    | 0    | 0    | 1    | 0    | 0    | 0    | 0    | 0    | 0    | 0    | 0    | 0         | 0    | 0    | 0    | 0    | 0    | 0    | 0    | 0    | 0    | 0    | 0    | 0    | 0    | 0    | 0    | 0    | 0    |   |
| IP100377154       | bromodomain adjacent to zinc finger domain, 1B                                                       | S 1468 | 100% (79.03)            | 1.0000                                | 19        | 16        | 2      | 1    | 1    | 0    | 1    | 0    | 3    | 1    | 1    | 0    | 1    | 3    | 1    | 1    | 1    | 1    | 0    | 3    | 1         | 1    | 1    | 1    | 0    | 2    | 0    | 1    | 0    | 1    | 1    | 2    | 0    | 1    | 2    | 0    | 1    | 1    |   |
| IP100377244       | Isoform 2 of Myeloid/lymphoid or mixed-lineage leukemia protein 2                                    | S 1091 | 100% (82.87)            | 1.0000                                | 5         | 1         | 1      | 0    | 0    | 0    | 0    | 0    | 3    | 0    | 0    | 0    | 0    | 0    | 1    | 0    | 0    | 0    | 0    | 0    | 0         | 0    | 0    | 0    | 0    | 1    | 0    | 0    | 0    | 0    | 0    | 0    | 0    | 0    | 0    | 0    | 0    | 0    |   |
| IP100377244       | Isoform 2 of Myeloid/lymphoid or mixed-lineage leukemia protein 2                                    | S 4158 | 100% (1,000.00)         | 1.0000                                | 6         | 2         | 1      | 1    | 0    | 0    | 0    | 0    | 1    | 1    | 0    | 0    | 0    | 0    | 0    | 1    | 1    | 0    | 0    | 0    | 1         | 0    | 0    | 0    | 0    | 0    | 0    | 0    | 0    | 0    | 0    | 0    | 1    | 0    | 0    | 0    | 0    | 0    |   |
| IP100377245       | Isoform 3 of Myeloid/lymphoid or mixed-lineage leukemia protein 2                                    | S 1396 | 100% (82.87)            | 1.0000                                | 5         | 1         | 1      | 0    | 0    | 0    | 0    | 0    | 3    | 0    | 0    | 0    | 0    | 0    | 1    | 0    | 0    | 0    | 0    | 0    | 0         | 0    | 0    | 0    | 0    | 0    | 1    | 0    | 0    | 0    | 0    | 0    | 0    | 0    | 0    | 0    | 0    | 0    |   |
| IP100377245       | Isoform 3 of Myeloid/lymphoid or mixed-lineage leukemia protein 2                                    | S 4466 | 100% (1,000.00)         | 1.0000                                | 6         | 2         | 1      | 1    | 0    | 0    | 0    | 1    | 1    | 0    | 0    | 0    | 0    | 0    | 1    | 1    | 0    | 0    | 0    | 0    | 1         | 0    | 0    | 0    | 0    | 0    | 0    | 0    | 0    | 0    | 0    | 0    | 1    | 0    | 0    | 0    | 0    | 0    |   |
| IP100382470       | Heat shock protein HSP 90-alpha 2                                                                    | S 353  | 100% (1,000.00)         | 1.0000                                | 43        | 34        | 2      | 8    | 5    | 1    | 0    | 0    | 2    | 9    | 4    | 0    | 0    | 0    | 4    | 8    | 0    | 0    | 0    | 0    | 1         | 6    | 3    | 1    | 0    | 0    | 1    | 6    | 5    | 0    | 0    | 1    | 1    | 5    | 4    | 0    | 0    | 0    |   |
| IP100382470       | Heat shock protein HSP 90-alpha 2                                                                    | S 385  | 100% (1,000.00)         | 1.0000                                | 34        | 38        | 2      | 6    | 2    | 1    | 0    | 0    | 2    | 6    | 2    | 0    | 0    | 0    | 4    | 6    | 3    | 0    | 0    | 0    | 3         | 7    | 2    | 1    | 0    | 0    | 2    | 6    | 2    | 2    | 1    | 0    | 3    | 6    | 2    | 0    | 0    | 1    |   |
| IP100382585       | 182 kDa protein                                                                                      | S 1002 | 100% (85.52)            | 1.0000                                | 9         | 9         | 2      | 1    | 0    | 0    | 0    | 0    | 3    | 0    | 0    | 0    | 0    | 0    | 2    | 1    | 0    | 0    | 0    | 0    | 3         | 0    | 0    | 0    | 0    | 2    | 0    | 0    | 0    | 0    | 0    | 4    | 0    | 0    | 0    | 0    | 0    |      |   |
| IP100382585       | 182 kDa protein                                                                                      | S 1151 | 100% (1,000.00)         | 1.0000                                | 6         | 5         | 2      | 1    | 0    | 0    | 0    | 0    | 1    | 1    | 0    | 0    | 0    | 0    | 1    | 0    | 0    | 0    | 0    | 0    | 0         | 1    | 0    | 0    | 0    | 0    | 1    | 1    | 0    | 0    | 0    | 0    | 1    | 1    | 0    | 0    | 0    | 0    |   |
| IP100382696       | Isoform 2 of Filamin-B                                                                               | S 1316 | 100% (80.42)            | 1.0000                                | 0         | 4         | 0      | 0    | 0    | 0    | 0    | 0    | 0    | 0    | 0    | 0    | 0    | 0    | 0    | 0    | 0    | 0    | 0    | 2    | 0         | 0    | 0    | 0    | 0    | 1    | 0    | 0    | 0    | 0    | 0    | 1    | 0    | 0    | 0    | 0    | 0    |      |   |
| IP100382696       | Isoform 2 of Filamin-B                                                                               | S 1505 | 100% (82.32)            | 1.0000                                | 4         | 6         | 1      | 0    | 0    | 0    | 0    | 0    | 1    | 0    | 0    | 0    | 0    | 0    | 2    | 0    | 0    | 0    | 0    | 0    | 2         | 0    | 0    | 0    | 0    | 0    | 2    | 0    | 0    | 0    | 0    | 0    | 2    | 0    | 0    | 0    | 0    | 0    |   |
| IP100382733       | Transcription repressor                                                                              | S 525  | 100% (42.41)            | 1.0000                                | 0         | 2         | 0      | 0    | 0    | 0    | 0    | 0    | 0    | 0    | 0    | 0    | 0    | 0    | 0    | 0    | 0    | 0    | 0    | 0    | 1         | 0    | 0    | 0    | 0    | 0    | 0    | 0    | 0    | 0    | 0    | 0    | 0    | 1    | 0    | 0    | 0    | 0    |   |
| IP100382737       | SON DNA-binding protein isoform G                                                                    | S 1657 | 100% (92.15)            | 1.0000                                | 21        | 17        | 6      | 2    | 0    | 0    | 0    | 0    | 4    | 3    |      |      |      |      |      |      |      |      |      |      |           |      |      |      |      |      |      |      |      |      |      |      |      |      |      |      |      |      |   |

Supplemental Table 3. A list of phosphorylation sites and their counts in SNU216 and SNU216-LR.

| Protein accession | Protein name                                         | Site   | Best Score <sup>1</sup> | Localization Probability <sup>2</sup> | Total No. |           | SNU216 |      |      |      |      |      |      |      |      |      |      |      |      |      |      |      | SNU216-LR |      |      |      |      |      |      |      |      |      |      |      |      |      |   |   |   |   |   |   |   |
|-------------------|------------------------------------------------------|--------|-------------------------|---------------------------------------|-----------|-----------|--------|------|------|------|------|------|------|------|------|------|------|------|------|------|------|------|-----------|------|------|------|------|------|------|------|------|------|------|------|------|------|---|---|---|---|---|---|---|
|                   |                                                      |        |                         |                                       | SNU 216   | SNU 216LR | 1_01   | 2_01 | 3_01 | 4_01 | 5_01 | 6_01 | 1_02 | 2_02 | 3_02 | 4_02 | 5_02 | 6_02 | 1_03 | 2_03 | 3_03 | 4_03 | 5_03      | 6_03 | 1_04 | 2_04 | 3_04 | 4_04 | 5_04 | 6_04 | 1_05 | 2_05 | 3_05 | 4_05 | 5_05 | 6_05 |   |   |   |   |   |   |   |
| IP100396557       | ZYX protein                                          | S 354  | 100% (62.18)            | 1.0000                                | 9         | 17        | 0      | 1    | 2    | 0    | 0    | 0    | 0    | 1    | 2    | 0    | 0    | 0    | 0    | 1    | 1    | 1    | 0         | 0    | 0    | 1    | 1    | 1    | 1    | 1    | 0    | 1    | 2    | 1    | 2    | 0    | 1 | 1 | 2 | 1 | 1 | 0 | 0 |
| IP100396658       | CDNA FU32603 fis, clone STOMA1000117                 | S 21   | 100% (72.00)            | 1.0000                                | 4         | 3         | 0      | 2    | 0    | 0    | 0    | 0    | 0    | 1    | 0    | 0    | 0    | 0    | 0    | 0    | 1    | 0    | 0         | 0    | 0    | 0    | 1    | 0    | 0    | 0    | 0    | 1    | 0    | 0    | 0    | 0    | 0 | 0 | 1 | 0 | 0 | 0 |   |
| IP100396937       | Isoform 8 of Periphilin-1                            | S 133  | 100% (40.44)            | 1.0000                                | 2         | 1         | 0      | 0    | 1    | 0    | 0    | 0    | 0    | 0    | 1    | 0    | 0    | 0    | 0    | 0    | 0    | 0    | 0         | 0    | 0    | 0    | 1    | 0    | 0    | 0    | 0    | 0    | 0    | 0    | 0    | 0    | 0 | 0 | 0 | 0 | 0 | 0 |   |
| IP100397361       | AXL receptor tyrosine kinase isoform 2               | S 603  | 100% (1,000.00)         | 1.0000                                | 0         | 7         | 0      | 0    | 0    | 0    | 0    | 0    | 0    | 0    | 0    | 0    | 0    | 0    | 0    | 0    | 0    | 0    | 0         | 0    | 1    | 1    | 0    | 0    | 0    | 0    | 1    | 1    | 0    | 1    | 0    | 0    | 1 | 0 | 0 | 1 | 0 | 0 |   |
| IP100397376       | nuclear protein Ukp68 isoform 1                      | S 409  | 100% (88.82)            | 1.0000                                | 4         | 8         | 0      | 1    | 0    | 0    | 0    | 0    | 0    | 2    | 0    | 0    | 0    | 0    | 0    | 0    | 1    | 0    | 0         | 0    | 0    | 1    | 1    | 0    | 0    | 0    | 0    | 1    | 1    | 1    | 0    | 0    | 0 | 0 | 1 | 1 | 0 | 0 |   |
| IP100397376       | nuclear protein Ukp68 isoform 1                      | S 515  | 100% (1,000.00)         | 1.0000                                | 8         | 10        | 1      | 1    | 0    | 0    | 1    | 0    | 1    | 1    | 0    | 0    | 0    | 0    | 1    | 1    | 0    | 0    | 1         | 1    | 0    | 1    | 1    | 0    | 1    | 0    | 0    | 1    | 1    | 1    | 0    | 0    | 1 | 0 | 1 | 1 | 0 | 0 |   |
| IP100397383       | Isoform 4 of Kinesin-like protein KIF18              | S 1487 | 100% (1,000.00)         | 1.0000                                | 8         | 6         | 2      | 0    | 0    | 0    | 0    | 0    | 3    | 0    | 0    | 0    | 0    | 0    | 0    | 3    | 0    | 0    | 0         | 0    | 0    | 2    | 0    | 0    | 0    | 0    | 0    | 2    | 0    | 0    | 0    | 0    | 0 | 2 | 0 | 0 | 0 | 0 |   |
| IP100397509       | Isoform 4 of Pre-mRNA-processing factor 40 homolog A | S 752  | 100% (1,000.00)         | 1.0000                                | 8         | 10        | 2      | 2    | 0    | 0    | 0    | 0    | 1    | 1    | 0    | 0    | 0    | 0    | 0    | 0    | 1    | 0    | 1         | 0    | 0    | 2    | 3    | 1    | 0    | 0    | 0    | 1    | 2    | 0    | 0    | 0    | 0 | 1 | 0 | 0 | 0 | 0 |   |
| IP100397509       | Isoform 4 of Pre-mRNA-processing factor 40 homolog A | S 754  | 100% (1,000.00)         | 1.0000                                | 13        | 15        | 2      | 4    | 0    | 0    | 0    | 0    | 2    | 2    | 0    | 0    | 0    | 0    | 0    | 1    | 1    | 0    | 1         | 0    | 0    | 2    | 4    | 1    | 0    | 0    | 0    | 2    | 4    | 0    | 0    | 0    | 0 | 1 | 1 | 0 | 0 | 0 |   |
| IP100397509       | Isoform 4 of Pre-mRNA-processing factor 40 homolog A | S 757  | 100% (1,000.00)         | 1.0000                                | 20        | 24        | 3      | 7    | 0    | 0    | 0    | 0    | 3    | 2    | 0    | 0    | 0    | 0    | 2    | 2    | 0    | 1    |           |      |      |      |      |      |      |      |      |      |      |      |      |      |   |   |   |   |   |   |   |

Supplemental Table 3. A list of phosphorylation sites and their counts in SNU216 and SNU216-LR.

| Protein accession | Protein name                                         | Site   | Best AScore <sup>1</sup> | Localization Probability <sup>2</sup> | Total No. |           | SNU216 |      |      |      |      |      |      |      |      |      |      |      |      |      |      |      | SNU216-LR |      |      |      |      |      |      |      |      |      |      |      |      |      |      |      |      |      |      |      |
|-------------------|------------------------------------------------------|--------|--------------------------|---------------------------------------|-----------|-----------|--------|------|------|------|------|------|------|------|------|------|------|------|------|------|------|------|-----------|------|------|------|------|------|------|------|------|------|------|------|------|------|------|------|------|------|------|------|
|                   |                                                      |        |                          |                                       | SNU 216   | SNU 216LR | 1_01   | 2_01 | 3_01 | 4_01 | 5_01 | 6_01 | 1_02 | 2_02 | 3_02 | 4_02 | 5_02 | 6_02 | 1_03 | 2_03 | 3_03 | 4_03 | 5_03      | 6_03 | 1_01 | 2_01 | 3_01 | 4_01 | 5_01 | 6_01 | 1_02 | 2_02 | 3_02 | 4_02 | 5_02 | 6_02 | 1_03 | 2_03 | 3_03 | 4_03 | 5_03 | 6_03 |
| IP100413671       | Isoform 2 of Bcl-2-associated transcription factor 1 | S 395  | 100% (79.02)             | 1.0000                                | 55        | 51        | 6      | 7    | 3    | 0    | 1    | 0    | 7    | 8    | 4    | 0    | 1    | 0    | 5    | 7    | 3    | 0    | 3         | 0    | 5    | 6    | 4    | 0    | 1    | 0    | 6    | 6    | 3    | 1    | 1    | 1    | 6    | 6    | 3    | 0    | 1    | 1    |
| IP100413672       | Isoform 3 of Bcl-2-associated transcription factor 1 | S 175  | 100% (1,000.00)          | 1.0000                                | 46        | 42        | 4      | 4    | 3    | 1    | 0    | 0    | 4    | 4    | 3    | 2    | 0    | 0    | 3    | 4    | 12   | 2    | 0         | 0    | 2    | 5    | 3    | 3    | 0    | 0    | 4    | 3    | 2    | 1    | 1    | 2    | 4    | 4    | 3    | 0    | 2    |      |
| IP100413672       | Isoform 3 of Bcl-2-associated transcription factor 1 | S 395  | 100% (79.02)             | 1.0000                                | 55        | 51        | 6      | 7    | 3    | 0    | 1    | 0    | 7    | 8    | 4    | 0    | 1    | 0    | 5    | 7    | 3    | 0    | 3         | 0    | 5    | 6    | 4    | 0    | 1    | 0    | 6    | 6    | 3    | 1    | 1    | 1    | 6    | 6    | 3    | 0    | 1    | 1    |
| IP100413728       | Isoform 1 of Spectrin alpha chain, brain             | S 1217 | 100% (1,000.00)          | 1.0000                                | 4         | 6         | 1      | 0    | 0    | 0    | 0    | 0    | 1    | 0    | 0    | 0    | 0    | 0    | 2    | 0    | 0    | 0    | 0         | 0    | 2    | 0    | 0    | 0    | 0    | 0    | 2    | 0    | 0    | 0    | 0    | 0    | 2    | 0    | 0    | 0    | 0    | 0    |
| IP100413734       | Isoform 6 of Transcriptional regulator ATRX          | S 549  | 100% (1,000.00)          | 1.0000                                | 1         | 0         | 0      | 0    | 0    | 0    | 0    | 0    | 0    | 0    | 0    | 0    | 0    | 0    | 0    | 0    | 0    | 0    | 1         | 0    | 0    | 0    | 0    | 0    | 0    | 0    | 0    | 0    | 0    | 0    | 0    | 0    | 0    | 0    | 0    | 0    | 0    | 0    |
| IP100413734       | Isoform 6 of Transcriptional regulator ATRX          | S 781  | 100% (47.64)             | 1.0000                                | 6         | 6         | 1      | 1    | 0    | 0    | 0    | 0    | 1    | 1    | 0    | 0    | 0    | 0    | 1    | 1    | 0    | 0    | 0         | 1    | 1    | 0    | 0    | 0    | 0    | 1    | 1    | 0    | 0    | 0    | 0    | 2    | 1    | 0    | 0    | 0    | 0    |      |
| IP100413734       | Isoform 6 of Transcriptional regulator ATRX          | S 782  | 100% (42.99)             | 1.0000                                | 6         | 6         | 1      | 1    | 0    | 0    | 0    | 0    | 1    | 1    | 0    | 0    | 0    | 0    | 0    | 1    | 1    | 0    | 0         | 0    | 1    | 1    | 0    | 0    | 0    | 1    | 1    | 0    | 0    | 0    | 0    | 2    | 1    | 0    | 0    | 0    | 0    |      |
| IP100413895       | Golgi autoantigen, golgin subfamily A member 2       | S 37   | 100% (41.87)             | 1.0000                                | 1         | 0         | 0      | 0    | 0    | 0    | 0    | 0    | 0    | 0    | 0    | 0    | 0    | 0    | 0    | 0    | 1    | 0    | 0         | 0    | 0    | 0    | 0    | 0    | 0    | 0    | 0    | 0    | 0    | 0    | 0    | 0    | 0    | 0    | 0    | 0    | 0    | 0    |
| IP100414101       | Isoform 2 of DNA topoisomerase 2-alpha               | S 1132 | 100% (1,000.00)          | 1.0000                                | 15        | 20        | 3      | 2    | 0    | 0    | 0    | 0    | 4    | 1    | 0    | 0    | 0    | 0    | 4    | 1    | 0    | 0    | 0         | 6    | 1    | 1    | 0    | 0    | 0    | 4    | 0    | 1    | 0    | 0    | 6    | 1    | 0    | 0    | 0    | 0    | 0    | 0    |
| IP100414101       | Isoform 2 of DNA topoisomerase 2-alpha               | S 1239 | 100% (103.92)            | 1.0000                                | 6         | 13        | 2      | 0    | 0    | 0    | 0    | 0    | 2    | 1    |      |      |      |      |      |      |      |      |           |      |      |      |      |      |      |      |      |      |      |      |      |      |      |      |      |      |      |      |





Supplemental Table 3. A list of phosphorylation sites and their counts in SNU216 and SNU216-LR.

| Protein accession | Protein name                                             | Site   | Best Ascore <sup>1</sup> | Localization Probability <sup>2</sup> | Total No. |           | SNU216 |      |      |      |      |      |      |      |      |      |      |      |      |      |      |      | SNU216-LR |      |      |      |      |      |      |      |      |      |      |      |      |      |   |   |   |   |   |   |   |   |
|-------------------|----------------------------------------------------------|--------|--------------------------|---------------------------------------|-----------|-----------|--------|------|------|------|------|------|------|------|------|------|------|------|------|------|------|------|-----------|------|------|------|------|------|------|------|------|------|------|------|------|------|---|---|---|---|---|---|---|---|
|                   |                                                          |        |                          |                                       | SNU 216   | SNU 216LR | 1_01   | 2_01 | 3_01 | 4_01 | 5_01 | 6_01 | 1_02 | 2_02 | 3_02 | 4_02 | 5_02 | 6_02 | 1_03 | 2_03 | 3_03 | 4_03 | 5_03      | 6_03 | 1_02 | 2_02 | 3_02 | 4_02 | 5_02 | 6_02 | 1_03 | 2_03 | 3_03 | 4_03 | 5_03 | 6_03 |   |   |   |   |   |   |   |   |
| IPI00472430       | Isoform 3 of Sp110 nuclear body protein                  | S 380  | 100% (50.40)             | 1.0000                                | 7         | 6         | 0      | 0    | 3    | 0    | 0    | 0    | 0    | 0    | 3    | 0    | 0    | 0    | 0    | 0    | 0    | 0    | 1         | 0    | 0    | 0    | 0    | 2    | 1    | 0    | 0    | 0    | 0    | 2    | 0    | 0    | 0 | 0 | 1 | 0 | 0 | 0 |   |   |
| IPI00472779       | Ankyrin-3                                                | S 847  | 100% (71.07)             | 1.0000                                | 3         | 0         | 2      | 0    | 0    | 0    | 0    | 0    | 1    | 0    | 0    | 0    | 0    | 0    | 0    | 0    | 0    | 0    | 0         | 0    | 0    | 0    | 0    | 0    | 0    | 0    | 0    | 0    | 0    | 0    | 0    | 0    | 0 | 0 | 0 | 0 | 0 |   |   |   |
| IPI00472782       | PHD finger protein 14 isoform 1                          | S 835  | 100% (1,000.00)          | 1.0000                                | 1         | 3         | 0      | 1    | 0    | 0    | 0    | 0    | 0    | 0    | 0    | 0    | 0    | 0    | 0    | 0    | 0    | 0    | 0         | 0    | 1    | 0    | 0    | 0    | 0    | 0    | 0    | 0    | 0    | 0    | 0    | 0    | 0 | 1 | 0 | 0 | 0 | 0 |   |   |
| IPI00472901       | chromodomain helicase DNA binding protein 7              | S 2559 | 100% (49.35)             | 1.0000                                | 4         | 5         | 1      | 0    | 0    | 0    | 0    | 0    | 1    | 1    | 0    | 0    | 0    | 0    | 0    | 0    | 1    | 0    | 0         | 0    | 1    | 0    | 0    | 0    | 0    | 0    | 0    | 1    | 1    | 1    | 0    | 0    | 0 | 1 | 0 | 0 | 0 | 0 |   |   |
| IPI00477005       | E1A binding protein p400                                 | S 2439 | 100% (1,000.00)          | 1.0000                                | 3         | 3         | 1      | 0    | 0    | 0    | 0    | 0    | 1    | 0    | 0    | 0    | 0    | 0    | 0    | 1    | 0    | 0    | 0         | 0    | 1    | 0    | 0    | 0    | 0    | 0    | 1    | 0    | 0    | 0    | 0    | 0    | 0 | 1 | 0 | 0 | 0 | 0 |   |   |
| IPI00477104       | Pleckstrin homology domain containing, family A member 6 | S 887  | 100% (72.55)             | 1.0000                                | 3         | 7         | 1      | 1    | 0    | 0    | 0    | 0    | 1    | 0    | 0    | 0    | 0    | 0    | 0    | 0    | 0    | 0    | 0         | 2    | 2    | 0    | 0    | 0    | 0    | 0    | 1    | 1    | 0    | 0    | 0    | 0    | 1 | 0 | 0 | 0 | 0 | 0 |   |   |
| IPI00477231       | Meningioma-expressed antigen 5                           | S 364  | 100% (99.63)             | 1.0000                                | 7         | 6         | 0      | 2    | 0    | 0    | 0    | 0    | 0    | 2    | 0    | 0    | 0    | 0    | 0    | 1    | 2    | 0    | 0         | 0    | 0    | 0    | 2    | 0    | 0    | 0    | 0    | 0    | 2    | 0    | 0    | 0    | 0 | 0 | 2 | 0 | 0 | 0 | 0 |   |
| IPI00477436       | hypothetical protein LOC55684                            | S 553  | 100% (1,000.00)          | 1.0000                                | 10        | 12        | 2      | 1    | 0    | 0    | 0    | 0    | 2    | 1    | 0    | 0    | 0    | 0    | 0    | 3    | 1    | 0    | 0         | 0    | 0    | 1    | 2    | 0    | 0    | 0    | 0    | 0    | 1    | 3    | 0    | 0    | 0 | 0 | 2 | 3 | 0 | 0 | 0 | 0 |
| IPI00477501       | 121 kDa protein                                          | S 624  | 100% (1,000.00)          | 1.0000                                | 4         | 10        | 1      | 0    | 0    | 0    | 0    | 0    | 1    | 2    | 0    | 0    | 0    | 0    | 0    | 0    | 0    | 0    | 0         | 0    | 2    | 2    | 0    | 0    | 0    | 0    | 1    | 2    | 0    | 0    | 0    | 0    | 0 | 1 | 2 | 0 | 0 | 0 | 0 |   |
| IPI00477526       | Conserved hypothetical protein                           | S 144  | 100% (1,000.00)          | 1.0000                                | 0         | 1         | 0      | 0    | 0    | 0    | 0    | 0    | 0    | 0    | 0    | 0    | 0    | 0    | 0    | 0    | 0    | 0    | 0         | 0    | 0    | 0    | 0    | 0    | 0    | 0    | 0    | 0    | 0    | 0    | 0    | 0    | 0 | 0 | 0 | 0 | 0 | 1 |   |   |
| IPI00477526       | Conserved hypothetical protein                           | S 267  | 100% (1,000.00)          | 1.0000                                | 7         | 7         | 0      | 0    | 1    | 1    | 0    | 0    | 0    | 0    | 1    | 1    | 0    | 0    | 0    | 0    | 0    | 1    | 2         | 0    | 0    | 0    | 0    | 0    | 1    | 2    | 0    | 0    | 0    | 0    | 1    | 1    | 0 | 0 | 0 | 1 | 1 | 0 | 0 |   |
| IPI00477763       | Serine/threonine-protein kinase MRCK beta                | S 1214 | 100% (1,000.00)          | 1.0000                                | 0         | 1         | 0      | 0    | 0    | 0    | 0    | 0    | 0    | 0    | 0    | 0    | 0    | 0    | 0    | 0    | 0    | 0    | 0         | 0    | 0    | 0    | 0    | 0    | 0    | 0    | 0    | 0    | 0    | 0    | 0    | 0    | 0 | 0 | 0 | 0 | 1 | 0 | 0 | 1 |
| IPI00477787       | Isoform AML-1B of Runt-related transcription factor 1    | S 212  | 100% (60.33)             | 1.0000                                | 10        | 3         | 0      | 0    | 1    | 2    | 0    | 0    | 0    | 0    | 2    | 2    | 0    | 0    | 0    | 0    | 0    | 1    | 2         | 0    | 0    | 0    | 0    | 1    | 1    | 0    | 0    | 0    | 0    | 0    | 0    | 0    | 0 | 0 | 0 | 0 | 1 | 0 | 0 | 0 |
| IPI00477805       | Isoform 1 of Telomere-associated protein RIF1            | S 1454 | 100% (1,000.00)          | 1.0000                                | 1         | 3         | 0      | 0    | 0    | 0    | 0    | 0    | 1    | 0    | 0    | 0    | 0    | 0    | 0    | 0    | 0    | 0    | 0         | 0    | 1    | 0    | 0    | 0    | 0    | 0    | 0    | 1    | 0    | 0    | 0    | 0    | 0 | 1 | 0 | 0 | 0 | 0 | 0 |   |
| IPI00477949       | zinc finger protein 262                                  | S 122  | 100% (46.31)             | 1.0000                                | 11        | 7         | 3      | 0    | 0    | 1    | 0    | 0    | 3    | 0    | 0    | 0    | 0    | 0    | 0    | 3    | 1    | 0    | 0         | 0    | 0    | 2    | 0    | 0    | 0    | 0    | 0    | 3    | 0    | 0    | 0    | 0    | 0 | 1 | 0 | 0 | 0 | 1 | 0 |   |
| IPI00477959       | TAF3 RNA polymerase II, TATA box binding protein         | S 183  | 100% (1,000.00)          | 1.0000                                | 3         | 3         | 0      | 0    | 0    | 0    | 0    | 0    | 0    | 2    | 0    | 0    | 0    | 0    | 0    | 0    | 1    | 0    | 0         | 0    | 0    | 0    | 0    | 0    | 0    | 0    | 1    | 1    | 0    | 0    | 0    | 0    | 0 | 1 | 0 | 0 | 0 | 0 |   |   |
| IPI00478030       | Isoform 1 of Angiotonin-like protein 2                   | S 236  | 100% (1,000.00)          | 1.0000                                | 1         | 2         | 0      | 0    | 0    | 0    | 0    | 0    | 0    | 0    | 0    | 0    | 0    | 0    | 0    | 0    | 1    | 0    | 0         | 0    | 0    | 0    | 0    | 0    | 0    | 0    | 0    | 0    | 0    | 0    | 0    | 0    | 1 | 0 | 0 | 0 | 0 | 0 |   |   |
| IPI00478086       | Non-class II protein                                     | S 275  | 100% (51.34)             | 1.0000                                | 8         | 6         | 1      | 1    | 0    | 2    | 1    | 0    | 1    | 0    | 0    | 1    | 0    | 0    | 0    | 0    | 0    | 0    | 1         | 0    | 0    | 1    | 1    | 1    | 1    | 1    | 0    | 0    | 1    | 0    | 0    | 1    | 0 | 0 | 0 | 0 | 0 | 0 | 0 |   |
| IPI00478086       | Non-class II protein                                     | S 276  | 100% (52.59)             | 1.0000                                | 8         | 6         | 1      | 1    | 0    | 2    | 1    | 0    | 1    | 0    | 0    | 1    | 0    | 0    | 0    | 0    | 0    | 0    | 1         | 0    | 0    | 1    | 1    | 1    | 1    | 0    | 0    | 1    | 0    | 0    | 1    | 0    | 0 | 1 | 0 | 0 | 0 | 0 | 0 | 0 |
| IPI00478127       | Transcription elongation factor A protein-like 3         | S 65   | 100% (1,000.00)          | 1.0000                                | 0         | 2         | 0      | 0    | 0    | 0    | 0    | 0    | 0    | 0    | 0    | 0    | 0    | 0    | 0    | 0    | 0    | 0    | 0         | 0    | 0    | 0    | 0    | 0    | 1    | 0    | 0    | 0    | 0    | 0    | 0    | 0    | 0 | 0 | 0 | 0 | 1 | 0 | 0 | 0 |
| IPI00478128       | GATA zinc finger domain containing 2A                    | S 119  | 100% (74.64)             | 1.0000                                | 16        | 16        | 1      | 0    | 3    | 1    | 0    | 0    | 2    | 2    | 3    | 0    | 0    | 0    | 0    | 1    | 0    | 2    | 1         | 0    | 0    | 0    | 3    | 3    | 0    | 0    | 0    | 0    | 1    | 3    | 0    | 0    | 0 | 0 | 1 | 2 | 3 | 0 | 0 | 0 |
| IPI00478210       | ankyrin 3 isoform 1                                      | S 847  | 100% (71.07)             | 1.0000                                | 3         | 0         | 2      | 0    | 0    | 0    | 0    | 0    | 1    | 0    | 0    | 0    | 0    | 0    | 0    | 0    | 0    | 0    | 0         | 0    | 0    | 0    | 0    | 0    | 0    | 0    | 0    | 0    | 0    | 0    | 0    | 0    | 0 | 0 | 0 | 0 | 0 | 0 | 0 |   |
| IPI00478232       | Isoform 1 of DNA topoisomerase 2-alpha                   | S 1142 | 100% (1,000.00)          | 1.0000                                | 15        | 20        | 3      | 2    | 0    | 0    | 0    | 0    | 4    | 1    | 0    | 0    | 0    | 0    | 0    | 4    | 1    | 0    | 0         | 0    | 6    | 1    | 1    | 0    | 0    | 0    | 4    | 0    | 1    | 0    | 0    | 0    | 6 | 1 | 0 | 0 | 0 | 0 | 0 |   |
| IPI00478232       | Isoform 1 of DNA topoisomerase 2-alpha                   | S 1249 | 100% (103.92)            | 1.0000                                | 6         | 13        | 2      | 0    | 0    | 0    | 0    | 0    | 2    | 1    | 0    | 0    | 0    | 0    | 1    | 0    | 0    | 0    | 0         | 4    | 0    | 0    | 0    | 0    | 0    | 3    | 1    | 0    | 0    | 0    | 0    | 4    | 1 | 0 | 0 | 0 | 0 | 0 | 0 |   |
| IPI00478232       | Isoform 1 of DNA topoisomerase 2-alpha                   | S 1283 | 100% (38.72)             | 1.0000                                | 17        | 31        | 4      | 0    | 0    | 0    | 0    | 0    | 5    | 1    | 0    | 0    | 0    | 0    | 6    | 1    | 0    | 0    | 0         | 0    | 8    | 2    | 1    | 0    | 0    | 0    | 9    | 1    | 0    | 0    | 0    | 0    | 9 | 1 | 0 | 0 | 0 | 0 | 0 |   |
| IPI00478232       | Isoform 1 of DNA topoisomerase 2-alpha                   | S 1387 | 100% (71.07)             | 1.0000                                | 1         | 3         | 1      | 0    | 0    | 0    | 0    | 0    | 0    | 0    | 0    | 0    | 0    | 0    | 0    | 0    | 0    | 0    | 0         | 2    | 0    | 0    | 0    | 0    | 0    | 0    | 0    | 0    | 0    | 0    | 0    | 0    | 0 | 1 | 0 | 0 | 0 | 0 | 0 |   |
| IPI00478232       | Isoform 1 of DNA topoisomerase 2-alpha                   | S 1390 | 100% (78.62)             | 1.0000                                | 1         | 3         | 1      | 0    | 0    | 0    | 0    | 0    | 0    | 0    | 0    | 0    | 0    | 0    | 0    | 0    | 0    | 0    | 0         | 2    | 0    | 0    | 0    | 0    | 0    | 0    | 0    | 0    | 0    | 0    | 0    | 0    | 0 | 0 | 1 | 0 | 0 | 0 | 0 | 0 |
| IPI00478232       | Isoform 1 of DNA topoisomerase 2-alpha                   | S 1411 | 100% (1,000.00)          | 1.0000                                | 5         | 6         | 2      | 0    | 0    | 0    | 0    | 0    | 2    | 0    | 0    | 0    | 0    | 0    | 1    | 0    | 0    | 0    | 0         | 2    | 0    | 0    | 0    | 0    | 0    | 2    | 0    | 0    | 0    | 0    | 2    | 0    | 0 | 0 | 2 | 0 | 0 | 0 | 0 | 0 |
|                   |                                                          |        |                          |                                       |           |           |        |      |      |      |      |      |      |      |      |      |      |      |      |      |      |      |           |      |      |      |      |      |      |      |      |      |      |      |      |      |   |   |   |   |   |   |   |   |

Supplemental Table 3. A list of phosphorylation sites and their counts in SNU216 and SNU216-LR.

| Protein accession | Protein name                                       | Site   | Best Ascore <sup>1</sup> | Localization Probability <sup>2</sup> | Total No. |           | SNU216 |      |      |      |      |      |      |      |      |      |      |      |      |      |      |      |      |      | SNU216-LR |      |      |      |      |      |      |      |      |      |      |      |      |      |      |      |      |      |   |   |
|-------------------|----------------------------------------------------|--------|--------------------------|---------------------------------------|-----------|-----------|--------|------|------|------|------|------|------|------|------|------|------|------|------|------|------|------|------|------|-----------|------|------|------|------|------|------|------|------|------|------|------|------|------|------|------|------|------|---|---|
|                   |                                                    |        |                          |                                       | SNU 216   | SNU 216LR | 1_01   | 2_01 | 3_01 | 4_01 | 5_01 | 6_01 | 1_02 | 2_02 | 3_02 | 4_02 | 5_02 | 6_02 | 1_03 | 2_03 | 3_03 | 4_03 | 5_03 | 6_03 | 1_01      | 2_01 | 3_01 | 4_01 | 5_01 | 6_01 | 1_02 | 2_02 | 3_02 | 4_02 | 5_02 | 6_02 | 1_03 | 2_03 | 3_03 | 4_03 | 5_03 | 6_03 |   |   |
| IPI00513991       | 620 kDa protein                                    | S 2454 | 100% (1,000.00)          | 1.0000                                | + 3       | + 1       | 1      | 0    | 0    | 0    | 0    | 0    | 1    | 0    | 0    | 0    | 0    | 0    | 1    | 0    | 0    | 0    | 0    | 0    | 1         | 0    | 0    | 0    | 0    | 0    | 0    | 0    | 0    | 0    | 0    | 0    | 0    | 0    | 0    | 0    | 0    | 0    | 0 |   |
| IPI00514068       | Ras GTPase-activating-like protein IQGAP3          | S 539  | 100% (83.29)             | 1.0000                                | + 4       | + 6       | 1      | 0    | 0    | 0    | 0    | 0    | 2    | 0    | 0    | 0    | 0    | 0    | 1    | 0    | 0    | 0    | 0    | 0    | 2         | 0    | 0    | 0    | 0    | 0    | 2    | 0    | 0    | 0    | 0    | 0    | 0    | 0    | 2    | 0    | 0    | 0    | 0 |   |
| IPI00514073       | vacuolar protein sorting 13D isoform 2             | S 1143 | 100% (49.80)             | 1.0000                                | + 1       | 0         | 1      | 0    | 0    | 0    | 0    | 0    | 0    | 0    | 0    | 0    | 0    | 0    | 0    | 0    | 0    | 0    | 0    | 0    | 0         | 0    | 0    | 0    | 0    | 0    | 0    | 0    | 0    | 0    | 0    | 0    | 0    | 0    | 0    | 0    | 0    | 0    |   |   |
| IPI00514088       | PREDICTED: hypothetical protein LOC25983 isoform 7 | S 142  | 100% (131.75)            | 1.0000                                | + 2       | + 1       | 0      | 0    | 0    | 0    | 0    | 0    | 0    | 0    | 0    | 1    | 0    | 0    | 0    | 0    | 0    | 0    | 1    | 0    | 0         | 0    | 0    | 0    | 0    | 0    | 0    | 0    | 0    | 0    | 0    | 0    | 0    | 0    | 0    | 0    | 1    | 0    | 0 |   |
| IPI00514088       | PREDICTED: hypothetical protein LOC25983 isoform 7 | S 143  | 100% (133.10)            | 1.0000                                | + 4       | + 5       | 0      | 0    | 0    | 1    | 0    | 0    | 0    | 0    | 0    | 1    | 0    | 0    | 0    | 0    | 0    | 0    | 2    | 0    | 0         | 0    | 0    | 0    | 2    | 0    | 0    | 0    | 1    | 0    | 0    | 0    | 0    | 0    | 0    | 2    | 0    | 0    | 0 |   |
| IPI00514106       | OTTHUMP00000016219                                 | S 134  | 100% (1,000.00)          | 1.0000                                | 0         | + 1       | 0      | 0    | 0    | 0    | 0    | 0    | 0    | 0    | 0    | 0    | 0    | 0    | 0    | 0    | 0    | 0    | 0    | 0    | 0         | 0    | 0    | 0    | 0    | 0    | 0    | 0    | 0    | 0    | 0    | 0    | 0    | 0    | 0    | 0    | 0    | 0    |   |   |
| IPI00514106       | OTTHUMP00000016219                                 | S 138  | 100% (1,000.00)          | 1.0000                                | + 3       | + 5       | 0      | 0    | 0    | 0    | 0    | 0    | 0    | 0    | 1    | 1    | 0    | 0    | 0    | 0    | 0    | 0    | 1    | 0    | 0         | 0    | 0    | 0    | 2    | 0    | 0    | 0    | 0    | 1    | 1    | 0    | 0    | 0    | 0    | 0    | 0    | 1    | 0 | 0 |
| IPI00514106       | OTTHUMP00000016219                                 | S 139  | 100% (1,000.00)          | 1.0000                                | + 3       | + 5       | 0      | 0    | 0    | 0    | 0    | 0    | 0    | 0    | 1    | 1    | 0    | 0    | 0    | 0    | 0    | 0    | 1    | 0    | 0         | 0    | 0    | 0    | 2    | 0    | 0    | 0    | 0    | 1    | 1    | 0    | 0    | 0    | 0    | 0    | 1    | 0    | 0 |   |
| IPI00514234       | Ladinin 1                                          | S 191  | 100% (1,000.00)          | 1.0000                                | + 2       | 0         | 0      | 0    | 0    | 0    | 0    | 0    | 0    | 0    | 0    | 1    | 0    | 0    | 0    | 0    | 0    | 1    | 0    | 0    | 0         | 0    | 0    | 0    | 0    | 0    | 0    | 0    | 0    | 0    | 0    | 0    | 0    | 0    | 0    | 0    | 0    | 0    |   |   |
| IPI00514396       | OTTHUMP00000022609                                 | S 390  | 100% (1,000.00)          | 1.0000                                | + 10      | + 12      |        |      |      |      |      |      |      |      |      |      |      |      |      |      |      |      |      |      |           |      |      |      |      |      |      |      |      |      |      |      |      |      |      |      |      |      |   |   |

Supplemental Table 3. A list of phosphorylation sites and their counts in SNU216 and SNU216-LR.

| Protein accession | Protein name                                                                | Site   | Best AScore <sup>1</sup> | Localization Probability <sup>2</sup> | Total No. |    | SNU216  |           |      |      |      |      |      |      |      |      |      |      |      |      |      |      | SNU216-LR |      |      |      |      |      |      |      |      |      |      |      |      |      |      |      |      |      |      |      |      |      |   |
|-------------------|-----------------------------------------------------------------------------|--------|--------------------------|---------------------------------------|-----------|----|---------|-----------|------|------|------|------|------|------|------|------|------|------|------|------|------|------|-----------|------|------|------|------|------|------|------|------|------|------|------|------|------|------|------|------|------|------|------|------|------|---|
|                   |                                                                             |        |                          |                                       |           |    | SNU 216 | SNU 216LR | 1_01 | 2_01 | 3_01 | 4_01 | 5_01 | 6_01 | 1_02 | 2_02 | 3_02 | 4_02 | 5_02 | 6_02 | 1_03 | 2_03 | 3_03      | 4_03 | 5_03 | 6_03 | 1_01 | 2_01 | 3_01 | 4_01 | 5_01 | 6_01 | 1_02 | 2_02 | 3_02 | 4_02 | 5_02 | 6_02 | 1_03 | 2_03 | 3_03 | 4_03 | 5_03 | 6_03 |   |
| IPI00555610       | 313 kDa protein                                                             | S 2170 | 100% (133.03)            | 1.0000                                | 4         | 7  | 1       | 0         | 0    | 0    | 0    | 0    | 0    | 2    | 0    | 0    | 0    | 0    | 0    | 0    | 1    | 0    | 0         | 0    | 0    | 0    | 2    | 1    | 0    | 0    | 0    | 0    | 2    | 0    | 0    | 0    | 0    | 0    | 2    | 0    | 0    | 0    | 0    | 0    | 0 |
| IPI00555610       | 313 kDa protein                                                             | S 2181 | 100% (1,000.00)          | 1.0000                                | 17        | 21 | 2       | 1         | 1    | 1    | 1    | 0    | 0    | 3    | 2    | 0    | 1    | 1    | 0    | 2    | 1    | 1    | 1         | 1    | 0    | 0    | 3    | 2    | 1    | 1    | 1    | 0    | 0    | 4    | 1    | 0    | 1    | 5    | 1    | 0    | 1    | 0    | 0    | 0    |   |
| IPI00555610       | 313 kDa protein                                                             | S 2519 | 100% (1,000.00)          | 1.0000                                | 11        | 12 | 1       | 1         | 1    | 1    | 0    | 0    | 1    | 1    | 0    | 0    | 1    | 1    | 0    | 0    | 1    | 1    | 1         | 0    | 0    | 0    | 2    | 1    | 1    | 0    | 0    | 0    | 2    | 1    | 1    | 0    | 0    | 0    | 2    | 1    | 1    | 0    | 0    | 0    |   |
| IPI00555610       | 313 kDa protein                                                             | S 2623 | 100% (38.16)             | 1.0000                                | 5         | 10 | 1       | 1         | 0    | 0    | 0    | 0    | 1    | 1    | 0    | 0    | 0    | 0    | 0    | 0    | 1    | 0    | 0         | 0    | 0    | 3    | 1    | 0    | 0    | 0    | 0    | 2    | 1    | 0    | 0    | 0    | 0    | 0    | 2    | 1    | 0    | 0    | 0    | 0    |   |
| IPI00555610       | 313 kDa protein                                                             | S 2820 | 100% (120.74)            | 1.0000                                | 14        | 11 | 1       | 2         | 1    | 0    | 0    | 1    | 1    | 2    | 0    | 0    | 0    | 1    | 2    | 1    | 0    | 0    | 0         | 0    | 1    | 1    | 1    | 0    | 0    | 1    | 1    | 1    | 0    | 0    | 1    | 2    | 2    | 0    | 1    | 2    | 2    | 0    | 0    | 1    |   |
| IPI00555610       | 313 kDa protein                                                             | S 2823 | 100% (111.69)            | 1.0000                                | 48        | 51 | 5       | 5         | 3    | 2    | 1    | 0    | 4    | 5    | 2    | 2    | 1    | 0    | 6    | 5    | 1    | 3    | 2         | 1    | 6    | 4    | 2    | 3    | 1    | 0    | 6    | 4    | 1    | 3    | 2    | 0    | 6    | 5    | 2    | 3    | 2    | 1    |      |      |   |
| IPI00555744       | RPL14 protein                                                               | S 139  | 100% (1,000.00)          | 1.0000                                | 6         | 5  | 0       | 0         | 0    | 0    | 0    | 1    | 0    | 0    | 0    | 0    | 0    | 2    | 1    | 0    | 0    | 0    | 1         | 1    | 0    | 0    | 0    | 1    | 1    | 0    | 0    | 0    | 0    | 0    | 0    | 1    | 1    | 0    | 0    | 0    | 0    | 0    | 0    |      |   |
| IPI00555838       | Isoform 1 of Serine/threonine-protein kinase MARK2                          | S 486  | 100% (38.72)             | 1.0000                                | 2         | 3  | 0       | 0         | 1    | 0    | 0    | 0    | 0    | 0    | 0    | 0    | 0    | 0    | 0    | 0    | 0    | 0    | 0         | 1    | 0    | 0    | 0    | 1    | 1    | 0    | 0    | 0    | 0    | 0    | 0    | 1    | 0    | 0    | 0    | 0    | 0    | 0    | 0    |      |   |
| IPI00556082       | Sorting nexin 1 isoform a variant (Fragment)                                | S 98   | 100% (99.60)             | 1.0000                                | 0         | 2  | 0       | 0         | 0    | 0    | 0    | 0    | 0    | 0    | 0    | 0    | 0    | 0    | 0    | 0    | 0    | 0    | 0         | 0    | 0    | 0    | 0    | 1    | 0    | 0    | 0    | 0    | 0    | 0    | 1    | 0    | 0    | 0    | 0    | 0    | 0    | 0    |      |      |   |
| IPI00556118       | SWI/SNF-related matrix-associated actin-dependent regulator of chromatin c1 | S 310  | 100% (1,000.00)          | 1.0000                                | 1         | 0  | 1       | 0         | 0</  |      |      |      |      |      |      |      |      |      |      |      |      |      |           |      |      |      |      |      |      |      |      |      |      |      |      |      |      |      |      |      |      |      |      |      |   |

Supplemental Table 3. A list of phosphorylation sites and their counts in SNU216 and SNU216-LR.

| Protein accession | Protein name                                                      | Site   | Best Ascore <sup>1</sup> | Localization Probability <sup>2</sup> | Total No.                            |    | SNU216  |           |      |      |      |      |      |      |      |      |      |      |      |      |      |      |      |      | SNU216-LR |      |      |      |      |      |      |      |      |      |      |      |      |      |      |      |      |      |      |      |   |   |   |   |   |
|-------------------|-------------------------------------------------------------------|--------|--------------------------|---------------------------------------|--------------------------------------|----|---------|-----------|------|------|------|------|------|------|------|------|------|------|------|------|------|------|------|------|-----------|------|------|------|------|------|------|------|------|------|------|------|------|------|------|------|------|------|------|------|---|---|---|---|---|
|                   |                                                                   |        |                          |                                       |                                      |    | SNU 216 | SNU 216LR | 1_01 | 2_01 | 3_01 | 4_01 | 5_01 | 6_01 | 1_02 | 2_02 | 3_02 | 4_02 | 5_02 | 6_02 | 1_03 | 2_03 | 3_03 | 4_03 | 5_03      | 6_03 | 1_01 | 2_01 | 3_01 | 4_01 | 5_01 | 6_01 | 1_02 | 2_02 | 3_02 | 4_02 | 5_02 | 6_02 | 1_03 | 2_03 | 3_03 | 4_03 | 5_03 | 6_03 |   |   |   |   |   |
| IPI00641842       | Splicing factor, arginineW/serine-rich 11                         | S 306  | 100% (1,000.00)          | 1.0000                                | <div><div></div><div></div></div> 2  | 0  | 0       | 0         | 1    | 0    | 0    | 0    | 0    | 0    | 0    | 1    | 0    | 0    | 0    | 0    | 0    | 0    | 0    | 0    | 0         | 0    | 0    | 0    | 0    | 0    | 0    | 0    | 0    | 0    | 0    | 0    | 0    | 0    | 0    | 0    | 0    | 0    | 0    | 0    | 0 | 0 | 0 |   |   |
| IPI00641842       | Splicing factor, arginineW/serine-rich 11                         | S 308  | 100% (1,000.00)          | 1.0000                                | <div><div></div><div></div></div> 2  | 0  | 0       | 0         | 1    | 0    | 0    | 0    | 0    | 0    | 0    | 1    | 0    | 0    | 0    | 0    | 0    | 0    | 0    | 0    | 0         | 0    | 0    | 0    | 0    | 0    | 0    | 0    | 0    | 0    | 0    | 0    | 0    | 0    | 0    | 0    | 0    | 0    | 0    | 0    | 0 | 0 | 0 | 0 |   |
| IPI00641842       | Splicing factor, arginineW/serine-rich 11                         | S 310  | 100% (1,000.00)          | 1.0000                                | <div><div></div><div></div></div> 2  | 0  | 0       | 0         | 1    | 0    | 0    | 0    | 0    | 0    | 0    | 0    | 1    | 0    | 0    | 0    | 0    | 0    | 0    | 0    | 0         | 0    | 0    | 0    | 0    | 0    | 0    | 0    | 0    | 0    | 0    | 0    | 0    | 0    | 0    | 0    | 0    | 0    | 0    | 0    | 0 | 0 | 0 | 0 |   |
| IPI00641842       | Splicing factor, arginineW/serine-rich 11                         | S 423  | 100% (1,000.00)          | 1.0000                                | <div><div></div><div></div></div> 9  | 8  | 0       | 1         | 3    | 0    | 0    | 0    | 0    | 0    | 0    | 1    | 2    | 0    | 0    | 0    | 0    | 0    | 0    | 0    | 1         | 1    | 0    | 0    | 0    | 1    | 1    | 0    | 0    | 0    | 0    | 1    | 3    | 0    | 0    | 0    | 0    | 0    | 1    | 1    | 0 | 0 | 0 | 0 |   |
| IPI00641990       | Isoform 1 of LAS1-like protein                                    | S 560  | 100% (1,000.00)          | 1.0000                                | <div><div></div><div></div></div> 2  | 4  | 0       | 1         | 0    | 0    | 0    | 0    | 0    | 0    | 1    | 0    | 0    | 0    | 0    | 0    | 0    | 0    | 0    | 0    | 0         | 0    | 0    | 1    | 0    | 0    | 0    | 0    | 0    | 0    | 2    | 0    | 0    | 0    | 0    | 0    | 0    | 1    | 0    | 0    | 0 | 0 | 0 |   |   |
| IPI00642125       | OTTHUMP00000016236                                                | S 141  | 100% (1,000.00)          | 1.0000                                | <div><div></div><div></div></div> 3  | 3  | 0       | 0         | 0    | 1    | 0    | 0    | 0    | 0    | 0    | 0    | 1    | 0    | 0    | 0    | 0    | 0    | 0    | 0    | 1         | 0    | 0    | 0    | 0    | 0    | 1    | 0    | 0    | 0    | 0    | 0    | 1    | 0    | 0    | 0    | 0    | 0    | 0    | 1    | 0 | 0 | 0 |   |   |
| IPI00642238       | Hypothetical protein DKFZp434I0612                                | S 443  | 100% (50.63)             | 1.0000                                | <div><div></div><div></div></div> 4  | 4  | 0       | 0         | 2    | 0    | 0    | 0    | 0    | 0    | 1    | 0    | 0    | 0    | 0    | 0    | 0    | 0    | 0    | 1    | 0         | 0    | 0    | 1    | 1    | 0    | 0    | 0    | 0    | 1    | 0    | 0    | 0    | 0    | 0    | 0    | 0    | 0    | 1    | 0    | 0 | 0 | 0 |   |   |
| IPI00642238       | Hypothetical protein DKFZp434I0612                                | S 444  | 100% (45.65)             | 1.0000                                | <div><div></div><div></div></div> 4  | 4  | 0       | 0         | 2    | 0    | 0    | 0    | 0    | 0    | 1    | 0    | 0    | 0    | 0    | 0    | 0    | 0    | 0    | 1    | 0         | 0    | 0    | 0    | 1    | 1    | 0    | 0    | 0    | 0    | 1    | 0    | 0    | 0    | 0    | 0    | 0    | 0    | 0    | 1    | 0 | 0 | 0 | 0 |   |
| IPI00642238       | Hypothetical protein DKFZp434I0612                                | S 448  | 100% (41.78)             | 1.0000                                | <div><div></div><div></div></div> 4  | 4  | 0       | 0         | 2    | 0    | 0    | 0    | 0    | 0    | 1    | 0    | 0    | 0    | 0    | 0    | 0    | 0    | 0    | 1    | 0         | 0    | 0    | 0    | 1    | 1    | 0    | 0    | 0    | 0    | 1    | 0    | 0    | 0    | 0    | 0    | 0    | 0    | 0    | 1    | 0 | 0 | 0 | 0 |   |
| IPI00642271       | Isoform 1 of Adenosine 3'-phospho 5'-phosphosulfate transporter 1 | S 427  | 100% (1,000.00)          | 1.0000                                | <div><div></div><div></div></div> 6  | 6  | 2       | 0         | 0    | 0    | 0    | 0    | 0    | 0    | 1    | 0    | 0    | 0    | 0    | 0    | 3    | 0    | 0    | 0    | 0         | 0    | 0    | 1    | 0    | 0    | 0    | 0    | 0    | 0    | 3    | 0    | 0    | 0    | 0    | 0    | 2    | 0    | 0    | 0    | 0 | 0 | 0 |   |   |
| IPI00642673       | ATP-binding cassette, sub-family F (GCN20), member 1              | S 106  | 100% (1,000.00)          | 1.0000                                | <div><div></div><div></div></div> 6  | 7  | 1       | 1         | 0    | 0    | 0    | 0    | 0    | 1    | 1    | 0    | 0    | 0    | 0    | 0    | 2    | 0    | 0    | 0    | 0         | 1    | 2    | 0    | 0    | 0    | 0    | 0    | 0    | 1    | 2    | 0    | 0    | 0    | 0    | 0    | 0    | 0    | 0    | 3    | 0 | 0 | 0 | 0 |   |
| IPI00642673       | ATP-binding cassette, sub-family F (GCN20), member 1              | S 110  | 100% (1,000.00)          | 1.0000                                | <div><div></div><div></div></div> 50 | 55 | 5       | 10        | 0    | 1    | 1    | 0    | 5    | 9    | 0    | 1    | 1    | 0    | 5    | 10   | 1    | 0    | 1    | 0    | 5         | 11   | 0    | 2    | 0    | 0    | 3    | 9    | 1    | 2    | 1    | 0    | 4    | 12   | 0    | 2    | 1    | 17   | 2    | 2    | 1 | 2 | 2 |   |   |
| IPI00642673       | ATP-binding cassette, sub-family F (GCN20), member 1              | S 141  | 100% (1,000.00)          | 1.0000                                | <div><div></div><div></div></div> 2  | 0  | 0       | 1         | 0    | 0    | 0    | 0    | 0    | 0    | 1    | 0    | 0    | 0    | 0    | 0    | 0    | 0    | 0    | 0    | 0         | 0    | 0    | 0    | 0    | 0    | 0    | 0    | 0    | 0    | 0    | 0    | 0    | 0    | 0    | 0    | 0    | 0    | 0    | 0    | 0 | 0 | 0 |   |   |
| IPI00642673       | ATP-binding cassette, sub-family F (GCN20), member 1              | S 229  | 100% (212.34)            | 1.0000                                | <div><div></div><div></div></div> 40 | 46 | 4       | 7         | 3    | 0    | 0    | 0    | 4    | 7    | 3    | 0    | 0    | 0    | 4    | 7    | 1    | 0    | 0    | 0    | 5         | 7    | 3    | 1    | 0    | 0    | 5    | 7    | 3    | 1    | 1    | 1    | 4    | 6    | 1    | 1    | 0    | 0    | 0    | 0    | 0 | 0 | 0 |   |   |
| IPI00642935       | Calcium homeostasis endoplasmic reticulum protein                 | S 651  | 100% (1,000.00)          | 1.0000                                | <div><div></div><div></div></div> 1  | 0  | 1       | 0         | 0    | 0    | 0    | 0    | 0    | 0    | 0    | 0    | 0    | 0    | 0    | 0    | 0    | 0    | 0    | 0    | 0         | 0    | 0    | 0    | 0    | 0    | 0    | 0    | 0    | 0    | 0    | 0    | 0    | 0    | 0    | 0    | 0    | 0    | 0    | 0    | 0 | 0 | 0 |   |   |
| IPI00642971       | eukaryotic translation elongation factor 1 delta isoform 1        | S 499  | 100% (93.66)             | 1.0000                                | <div><div></div><div></div></div> 13 | 15 | 0       | 0         | 0    | 3    | 1    | 0    | 0    | 0    | 1    | 3    | 1    | 0    | 0    | 0    | 0    | 0    | 2    | 1    | 1         | 1    | 1    | 1    | 1    | 1    | 2    | 0    | 0    | 0    | 3    | 1    | 0    | 1    | 0    | 0    | 2    | 1    | 1    | 1    | 1 | 1 | 1 |   |   |
| IPI00642971       | eukaryotic translation elongation factor 1 delta isoform 1        | S 528  | 100% (1,000.00)          | 1.0000                                | <div><div></div><div></div></div> 71 | 82 | 2       | 1         | 1    | 12   | 7    | 1    | 2    | 1    | 1    | 12   | 6    | 0    | 2    | 2    | 2    | 11   | 6    | 2    | 2         | 3    | 17   | 3    | 2    | 1    | 2    | 2    | 18   | 2    | 2    | 2    | 2    | 2    | 1    | 17   | 2    | 2    | 1    | 17   | 2 | 2 |   |   |   |
| IPI00643082       | CDC-like kinase 2 isoform 1                                       | S 141  | 100% (64.00)             | 1.0000                                | <div><div></div><div></div></div> 3  | 6  | 0       | 0         | 1    | 0    | 0    | 0    | 0    | 0    | 1    | 0    | 0    | 0    | 0    | 0    | 0    | 0    | 1    | 0    | 0         | 0    | 0    | 0    | 2    | 0    | 0    | 0    | 0    | 0    | 2    | 0    | 0    | 0    | 0    | 0    | 0    | 0    | 2    | 0    | 0 | 0 | 0 |   |   |
| IPI00643153       | Isoform 3 of HECT, UBA and WWE domain-containing protein 1        | S 1075 | 100% (81.69)             | 1.0000                                | <div><div></div><div></div></div> 3  | 3  | 1       | 0         | 0    | 0    | 0    | 0    | 1    | 0    | 0    | 0    | 0    | 0    | 0    | 1    | 0    | 0    | 0    | 0    | 0         | 0    | 0    | 1    | 0    | 0    | 0    | 0    | 0    | 1    | 0    | 0    | 0    | 0    | 0    | 1    | 0    | 0    | 0    | 0    | 0 | 0 | 0 | 0 |   |
| IPI00643168       | Isoform 2 of Tight junction-associated protein 1                  | S 290  | 100% (1,000.00)          | 1.0000                                | <div><div></div><div></div></div> 9  | 7  | 0       | 1         | 1    | 1    | 0    | 0    | 1    | 1    | 1    | 1    | 1    | 0    | 0    | 1    | 1    | 0    | 0    | 0    | 0         | 0    | 1    | 1    | 1    | 0    | 0    | 0    | 1    | 1    | 0    | 0    | 0    | 0    | 0    | 1    | 1    | 0    | 0    | 0    | 1 | 1 | 0 | 0 | 0 |
| IPI00643259       | RhoW/rac guanine nucleotide exchange factor (GEF) 2               | S 933  | 100% (1,000.00)          | 1.0000                                | <div><div></div><div></div></div> 3  | 2  | 0       | 0         | 0    | 0    | 0    | 0    | 0    | 0    | 1    | 0    | 0    | 0    | 0    | 0    | 2    | 0    | 0    | 0    | 0         | 0    | 0    | 0    | 0    | 0    | 0    | 0    | 0    | 0    | 0    | 0    | 0    | 0    | 0    | 1    | 0    | 0    | 0    | 0    | 1 | 0 | 0 | 0 |   |
| IPI00643342       | Phosphoprotein enriched in astrocytes 15                          | S 137  | 100% (1,000.00)          | 1.0000                                | <div><div></div><div></div></div> 4  | 4  | 0       | 0         | 0    | 0    | 1    | 0    | 0    | 0    | 0    | 0    | 0    | 2    | 0    | 0    | 0    | 0    | 0    | 0    | 0         | 0    | 1    | 0    | 0    | 0    | 0    | 0    | 0    | 0    | 1    | 0    | 0    | 0    | 0    | 1    | 0    | 0    | 0    | 0    | 2 | 0 | 0 | 0 |   |
| IPI00643352       | nucleoporin 214kDa                                                | S 678  | 100% (1,000.00)          | 1.0000                                | <div><div></div><div></div></div> 12 | 9  | 0       | 1         | 0    | 0    | 0    | 0    | 2    | 2    | 1    | 0    | 0    | 0    | 4    | 2    | 0    | 0    | 0    | 0    | 0         | 2    | 1    | 0    | 0    | 0    | 0    | 1    | 0    | 0    | 0    | 0    | 1    | 0    | 0    | 0    | 0    | 4    | 1    | 0    | 0 | 0 | 0 |   |   |
| IPI00643352       | nucleoporin 214kDa                                                | S 940  | 100% (1,000.00)          | 1.0000                                | <div><div></div><div></div></div> 1  |    |         |           |      |      |      |      |      |      |      |      |      |      |      |      |      |      |      |      |           |      |      |      |      |      |      |      |      |      |      |      |      |      |      |      |      |      |      |      |   |   |   |   |   |



Supplemental Table 3. A list of phosphorylation sites and their counts in SNU216 and SNU216-LR.

| Protein accession | Protein name                                                                 | Site   | Best AScore <sup>1</sup> | Localization Probability <sup>2</sup> | Total No. |      | SNU216  |           |      |      |      |      |      |      |      |      |      |      |      |      |      |      | SNU216-LR |      |      |      |      |      |      |      |      |      |      |      |      |      |      |      |      |      |      |      |      |      |   |   |   |   |   |   |
|-------------------|------------------------------------------------------------------------------|--------|--------------------------|---------------------------------------|-----------|------|---------|-----------|------|------|------|------|------|------|------|------|------|------|------|------|------|------|-----------|------|------|------|------|------|------|------|------|------|------|------|------|------|------|------|------|------|------|------|------|------|---|---|---|---|---|---|
|                   |                                                                              |        |                          |                                       |           |      | SNU 216 | SNU 216LR | 1_01 | 2_01 | 3_01 | 4_01 | 5_01 | 6_01 | 1_02 | 2_02 | 3_02 | 4_02 | 5_02 | 6_02 | 1_03 | 2_03 | 3_03      | 4_03 | 5_03 | 6_03 | 1_01 | 2_01 | 3_01 | 4_01 | 5_01 | 6_01 | 1_02 | 2_02 | 3_02 | 4_02 | 5_02 | 6_02 | 1_03 | 2_03 | 3_03 | 4_03 | 5_03 | 6_03 |   |   |   |   |   |   |
| IPI00738219       | PREDICTED: similar to Down-regulated in metastasis protein                   | S 2601 | 100% (1,000.00)          | 1.0000                                | + 3       | + 3  |         |           | 1    | 0    | 0    | 0    | 0    | 0    | 1    | 0    | 0    | 0    | 0    | 0    | 0    | 1    | 0         | 0    | 0    | 0    | 0    | 1    | 0    | 0    | 0    | 0    | 0    | 0    | 1    | 0    | 0    | 0    | 0    | 0    | 1    | 0    | 0    | 0    | 0 | 0 | 0 |   |   |   |
| IPI00738275       | PREDICTED: WD repeat domain 43 isoform 2                                     | S 77   | 100% (1,000.00)          | 1.0000                                | + 3       | + 2  |         |           | 0    | 1    | 1    | 0    | 0    | 0    | 0    | 0    | 0    | 0    | 0    | 0    | 0    | 0    | 0         | 0    | 0    | 0    | 0    | 1    | 1    | 0    | 0    | 0    | 0    | 0    | 0    | 0    | 0    | 0    | 0    | 0    | 0    | 0    | 0    | 0    | 0 | 0 | 0 |   |   |   |
| IPI00738275       | PREDICTED: WD repeat domain 43 isoform 2                                     | S 431  | 100% (54.32)             | 1.0000                                | + 5       | + 6  |         |           | 0    | 1    | 2    | 0    | 0    | 0    | 0    | 0    | 0    | 2    | 0    | 0    | 0    | 0    | 0         | 0    | 0    | 0    | 0    | 0    | 1    | 0    | 0    | 0    | 0    | 0    | 1    | 2    | 0    | 0    | 0    | 0    | 0    | 0    | 0    | 1    | 1 | 0 | 0 | 0 |   |   |
| IPI00738937       | PREDICTED: hypothetical protein LOC57479 isoform 1                           | S 61   | 100% (77.54)             | 1.0000                                | + 2       | + 2  |         |           | 1    | 0    | 0    | 0    | 0    | 0    | 1    | 0    | 0    | 0    | 0    | 0    | 0    | 0    | 0         | 0    | 0    | 0    | 1    | 0    | 0    | 0    | 0    | 0    | 0    | 1    | 0    | 0    | 0    | 0    | 0    | 0    | 0    | 0    | 0    | 0    | 0 | 0 | 0 | 0 |   |   |
| IPI00739117       | HBxAg transactivated protein 2                                               | S 2105 | 100% (1,000.00)          | 1.0000                                | + 3       | + 3  |         |           | 1    | 0    | 0    | 0    | 0    | 0    | 2    | 0    | 0    | 0    | 0    | 0    | 0    | 0    | 0         | 0    | 0    | 0    | 1    | 0    | 0    | 0    | 0    | 0    | 0    | 1    | 0    | 0    | 0    | 0    | 0    | 0    | 0    | 0    | 0    | 0    | 0 | 0 | 0 | 0 |   |   |
| IPI00739139       | PREDICTED: similar to 60S ribosomal protein L14 (CAG-1SL 7) isoform 1        | S 139  | 100% (1,000.00)          | 1.0000                                | + 6       | + 5  |         |           | 0    | 0    | 0    | 0    | 0    | 0    | 1    | 0    | 0    | 0    | 0    | 2    | 1    | 0    | 0         | 0    | 0    | 1    | 1    | 0    | 0    | 0    | 0    | 1    | 1    | 0    | 0    | 0    | 1    | 1    | 0    | 0    | 0    | 0    | 0    | 0    | 0 | 0 | 0 | 0 |   |   |
| IPI00739371       | PREDICTED: similar to Golgi autoantigen, golgin subfamily A member 6         | S 1079 | 100% (87.62)             | 1.0000                                | + 6       | + 7  |         |           | 2    | 0    | 0    | 0    | 0    | 0    | 0    | 1    | 1    | 0    | 0    | 0    | 0    | 1    | 1         | 0    | 0    | 0    | 2    | 1    | 0    | 0    | 0    | 0    | 0    | 1    | 1    | 0    | 0    | 0    | 0    | 0    | 0    | 0    | 0    | 0    | 0 | 0 | 0 | 0 |   |   |
| IPI00739607       | PREDICTED: similar to CG32045-PB, isoform B isoform 5                        | S 398  | 100% (51.81)             | 1.0000                                | 0         | + 1  |         |           | 0    | 0    | 0    | 0    | 0    | 0    | 0    | 0    | 0    | 0    | 0    | 0    | 0    | 0    | 0         | 0    | 0    | 0    | 1    | 0    | 0    | 0    | 0    | 0    | 0    | 0    | 0    | 0    | 0    | 0    | 0    | 0    | 0    | 0    | 0    | 0    | 0 | 0 | 0 | 0 |   |   |
| IPI00739607       | PREDICTED: similar to CG32045-PB, isoform B isoform 5                        | S 899  | 100% (1,000.00)          | 1.0000                                | + 2       | + 3  |         |           | 0    | 0    | 0    | 0    | 0    | 0    | 1    | 0    | 0    | 0    | 0    | 0    | 0    | 1    | 0         | 0    | 0    | 0    | 1    | 0    | 0    | 0    | 0    | 0    | 0    | 1    | 0    | 0    | 0    | 0    | 0    | 0    | 0    | 0    | 0    | 0    | 0 | 0 | 0 | 0 |   |   |
| IPI00739795       | Isoform 5 of StAR-related lipid transfer protein 13                          | S 381  | 100% (1,000.00)          | 1.0000                                | + 3       | 0    |         |           | 0    | 1    | 1    | 0    | 0    | 0    | 0    | 0    | 0    | 0    | 0    | 0    | 0    | 0    | 0         | 0    | 0    | 0    | 0    | 0    | 0    | 0    | 0    | 0    | 0    | 0    | 0    | 0    | 0    | 0    | 0    | 0    | 0    | 0    | 0    | 0    | 0 | 0 | 0 | 0 |   |   |
| IPI00740019       | PREDICTED: similar to DVL-binding protein DAPLE isoform 9                    | S 227  | 100% (131.34)            | 1.0000                                | + 2       | + 3  |         |           | 1    | 0    | 0    | 0    | 0    | 0    | 1    | 0    | 0    | 0    | 0    | 0    | 0    | 0    | 0         | 0    | 0    | 0    | 1    | 0    | 0    | 0    | 0    | 0    | 0    | 1    | 0    | 0    | 0    | 0    | 0    | 0    | 0    | 0    | 0    | 0    | 0 | 0 | 0 | 0 | 0 | 0 |
| IPI00740207       | RACK7 isoform j                                                              | S 663  | 100% (86.75)             | 1.0000                                | + 9       | + 9  |         |           | 1    | 2    | 0    | 0    | 0    | 0    | 0    | 2    | 0    | 0    | 0    | 0    | 0    | 1    | 2         | 0    | 0    | 0    | 2    | 1    | 0    | 0    | 0    | 0    | 0    | 1    | 2    | 0    | 0    | 0    | 0    | 0    | 0    | 0    | 0    | 0    | 0 | 0 | 0 | 0 | 0 | 0 |
| IPI00741204       | RACK7 isoform f                                                              | S 663  | 100% (86.75)             | 1.0000                                | + 9       | + 9  |         |           | 1    | 2    | 0    | 0    | 0    | 0    | 0    | 2    | 0    | 0    | 0    | 0    | 0    | 1    | 2         | 0    | 0    | 0    | 2    | 1    | 0    | 0    | 0    | 0    | 0    | 1    | 2    | 0    | 0    | 0    | 0    | 0    | 0    | 0    | 0    | 0    | 0 | 0 | 0 | 0 | 0 | 0 |
| IPI00741537       | PREDICTED: hypothetical protein LOC84726 isoform 1                           | S 388  | 100% (1,000.00)          | 1.0000                                | 0         | + 1  |         |           | 0    | 0    | 0    | 0    | 0    | 0    | 0    | 0    | 0    | 0    | 0    | 0    | 0    | 0    | 0         | 0    | 0    | 0    | 1    | 0    | 0    | 0    | 0    | 0    | 0    | 0    | 0    | 0    | 0    | 0    | 0    | 0    | 0    | 0    | 0    | 0    | 0 | 0 | 0 | 0 | 0 | 0 |
| IPI00741537       | PREDICTED: hypothetical protein LOC84726 isoform 1                           | S 613  | 100% (1,000.00)          | 1.0000                                | + 2       | + 1  |         |           | 1    | 0    | 0    | 0    | 0    | 0    | 1    | 0    | 0    | 0    | 0    | 0    | 0    | 0    | 0         | 0    | 0    | 0    | 1    | 0    | 0    | 0    | 0    | 0    | 0    | 0    | 0    | 0    | 0    | 0    | 0    | 0    | 0    | 0    | 0    | 0    | 0 | 0 | 0 | 0 | 0 | 0 |
| IPI00741668       | Isoform 7 of Homeobox protein cut-like 1                                     | S 659  | 100% (1,000.00)          | 1.0000                                | 0         | + 1  |         |           | 0    | 0    | 0    | 0    | 0    | 0    | 0    | 0    | 0    | 0    | 0    | 0    | 0    | 0    | 0         | 0    | 0    | 0    | 0    | 0    | 0    | 0    | 0    | 0    | 0    | 0    | 0    | 0    | 0    | 0    | 0    | 0    | 0    | 0    | 0    | 0    | 0 | 0 | 0 | 0 | 0 | 0 |
| IPI00741728       | PREDICTED: similar to heterogeneous nuclear ribonucleoprotein U              | S 318  | 100% (1,000.00)          | 1.0000                                | 54        | 64   |         |           | 4    | 9    | 3    | 2    | 0    | 0    | 7    | 9    | 2    | 1    | 0    | 0    | 0    | 4    | 11        | 0    | 0    | 1    | 1    | 0    | 7    | 5    | 3    | 2    | 0    | 0    | 4    | 12   | 3    | 1    | 1    | 2    | 6    | 12   | 3    | 1    | 0 | 0 | 0 | 2 |   |   |
| IPI00741728       | PREDICTED: similar to heterogeneous nuclear ribonucleoprotein U              | S 325  | 100% (1,000.00)          | 1.0000                                | + 4       | + 6  |         |           | 0    | 0    | 0    | 0    | 0    | 0    | 1    | 1    | 0    | 0    | 0    | 0    | 0    | 0    | 2         | 0    | 0    | 0    | 1    | 1    | 0    | 0    | 0    | 0    | 0    | 0    | 2    | 0    | 0    | 0    | 0    | 0    | 0    | 0    | 0    | 0    | 0 | 0 | 0 | 0 | 0 | 0 |
| IPI00741772       | Isoform 4 of StAR-related lipid transfer protein 13                          | S 354  | 100% (1,000.00)          | 1.0000                                | + 3       | 0    |         |           | 0    | 1    | 1    | 0    | 0    | 0    | 0    | 0    | 0    | 0    | 0    | 0    | 0    | 0    | 0         | 0    | 0    | 0    | 0    | 0    | 0    | 0    | 0    | 0    | 0    | 0    | 0    | 0    | 0    | 0    | 0    | 0    | 0    | 0    | 0    | 0    | 0 | 0 | 0 | 0 | 0 | 0 |
| IPI00741894       | PREDICTED: similar to E3 ubiquitin protein ligase, HECT domain containing, 1 | S 2370 | 100% (76.06)             | 1.0000                                | + 2       | 0    |         |           | 0    | 0    | 0    | 0    | 0    | 0    | 0    | 1    | 0    | 0    | 0    | 0    | 0    | 0    | 0         | 0    | 0    | 0    | 0    | 0    | 0    | 0    | 0    | 0    | 0    | 0    | 0    | 0    | 0    | 0    | 0    | 0    | 0    | 0    | 0    | 0    | 0 | 0 | 0 | 0 | 0 | 0 |
| IPI00742102       | PREDICTED: hypothetical protein LOC25983 isoform 9                           | S 117  | 100% (131.75)            | 1.0000                                | + 2       | + 1  |         |           | 0    | 0    | 0    | 0    | 0    | 0    | 0    | 0    | 0    | 0    | 0    | 0    | 0    | 0    | 0         | 0    | 0    | 0    | 1    | 0    | 0    | 0    | 0    | 0    | 0    | 0    | 0    | 0    | 0    | 0    | 0    | 0    | 0    | 0    | 0    | 0    | 0 | 0 | 0 | 0 | 0 | 0 |
| IPI00742102       | PREDICTED: hypothetical protein LOC25983 isoform 9                           | S 118  | 100% (133.10)            | 1.0000                                | + 4       | + 5  |         |           | 0    | 0    | 0    | 0    | 0    | 0    | 0    | 0    | 0    | 0    | 0    | 0    | 0    | 0    | 0         | 0    | 0    | 0    | 0    | 0    | 0    | 0    | 0    | 0    | 0    | 0    | 0    | 0    | 0    | 0    | 0    | 0    | 0    | 0    | 0    | 0    | 0 | 0 | 0 | 0 | 0 | 0 |
| IPI00742111       | Isoform 6 of Homeobox protein cut-like 1                                     | S 761  | 100% (1,000.00)          | 1.0000                                | 0         | + 1  |         |           | 0    | 0    | 0    | 0    | 0    | 0    | 0    | 0    | 0    | 0    | 0    | 0    | 0    | 0    | 0         | 0    | 0    | 0    | 0    | 0    | 0    | 0    | 0    | 0    | 0    | 0    | 0    | 0    | 0    | 0    | 0    | 0    | 0    | 0    | 0    | 0    | 0 | 0 | 0 | 0 | 0 | 0 |
| IPI00742743       | Isoform 2 of Tumor suppressor p53-binding protein 1                          | S 270  | 100% (100.23)            | 1.0000                                | + 12      | + 10 |         |           | 2    | 1    | 1    | 0    | 0    | 0    | 2    | 1    | 1    | 0    | 0    | 0    | 0    | 2    | 1         | 1    | 0    | 0    | 0    | 2    | 1    | 0    | 0    | 0    | 0    | 0    | 3    | 1    | 0    | 0    | 0    | 0    | 0    | 0    | 0    | 0    | 0 | 0 | 0 | 0 | 0 | 0 |
| IPI00742743       | Isoform 2 of Tumor suppressor p53-binding protein 1                          | S 299  | 100% (78.16)             | 1.0000                                | + 8       | + 4  |         |           | 2    | 1    | 0    | 0</  |      |      |      |      |      |      |      |      |      |      |           |      |      |      |      |      |      |      |      |      |      |      |      |      |      |      |      |      |      |      |      |      |   |   |   |   |   |   |

Supplemental Table 3. A list of phosphorylation sites and their counts in SNU216 and SNU216-LR.

| Protein accession | Protein name                                                       | Site   | Best Score <sup>1</sup> | Localization Probability <sup>2</sup> | Total No. |    | SNU216  |           |      |      |      |      |      |      |      |      |      |      |      |      |      |      | SNU216-LR |      |      |      |      |      |      |      |      |      |      |      |      |      |      |      |      |      |      |      |      |
|-------------------|--------------------------------------------------------------------|--------|-------------------------|---------------------------------------|-----------|----|---------|-----------|------|------|------|------|------|------|------|------|------|------|------|------|------|------|-----------|------|------|------|------|------|------|------|------|------|------|------|------|------|------|------|------|------|------|------|------|
|                   |                                                                    |        |                         |                                       |           |    | SNU 216 | SNU 216LR | 1_01 | 2_01 | 3_01 | 4_01 | 5_01 | 6_01 | 1_02 | 2_02 | 3_02 | 4_02 | 5_02 | 6_02 | 1_03 | 2_03 | 3_03      | 4_03 | 5_03 | 6_03 | 1_01 | 2_01 | 3_01 | 4_01 | 5_01 | 6_01 | 1_02 | 2_02 | 3_02 | 4_02 | 5_02 | 6_02 | 1_03 | 2_03 | 3_03 | 4_03 | 5_03 |
| IPI00746182       | SEC31-like 1 isoform 1                                             | S 799  | 100% (1,000.00)         | 1.0000                                | 15        | 17 | 2       | 4         | 0    | 0    | 0    | 0    | 0    | 2    | 3    | 0    | 1    | 0    | 0    | 1    | 2    | 0    | 0         | 0    | 0    | 3    | 2    | 1    | 1    | 0    | 0    | 4    | 2    | 0    | 0    | 0    | 0    | 2    | 2    | 0    | 0    | 0    | 0    |
| IPI00746204       | PARF                                                               | S 596  | 100% (1,000.00)         | 1.0000                                | 10        | 12 | 2       | 1         | 0    | 0    | 0    | 0    | 2    | 1    | 0    | 0    | 0    | 0    | 0    | 3    | 1    | 0    | 0         | 0    | 0    | 1    | 2    | 0    | 0    | 0    | 0    | 1    | 3    | 0    | 0    | 0    | 0    | 2    | 3    | 0    | 0    | 0    | 0    |
| IPI00746657       | 54 kDa protein                                                     | S 79   | 100% (1,000.00)         | 1.0000                                | 13        | 10 | 0       | 1         | 2    | 1    | 0    | 0    | 0    | 0    | 1    | 1    | 1    | 0    | 0    | 0    | 1    | 4    | 1         | 0    | 0    | 0    | 1    | 2    | 1    | 0    | 0    | 0    | 1    | 1    | 1    | 0    | 0    | 0    | 1    | 1    | 1    | 0    | 0    |
| IPI00746684       | dedicator of cytokinesis 5                                         | S 1766 | 100% (1,000.00)         | 1.0000                                | 2         | 1  | 1       | 0         | 0    | 0    | 0    | 0    | 1    | 0    | 0    | 0    | 0    | 0    | 0    | 0    | 0    | 0    | 0         | 0    | 0    | 0    | 0    | 0    | 0    | 0    | 0    | 0    | 0    | 0    | 0    | 0    | 0    | 1    | 0    | 0    | 0    | 0    |      |
| IPI00746752       | Isoform C of Bromodomain and WD-repeat domain-containing protein 1 | S 696  | 100% (71.95)            | 1.0000                                | 4         | 5  | 1       | 0         | 0    | 0    | 0    | 0    | 2    | 0    | 0    | 0    | 0    | 0    | 1    | 0    | 0    | 0    | 0         | 0    | 2    | 0    | 0    | 0    | 0    | 0    | 2    | 0    | 0    | 0    | 0    | 1    | 0    | 0    | 0    | 0    | 0    | 0    |      |
| IPI00746773       | IQ motif containing GTPase activating protein 3                    | S 496  | 100% (83.29)            | 1.0000                                | 4         | 6  | 1       | 0         | 0    | 0    | 0    | 0    | 2    | 0    | 0    | 0    | 0    | 0    | 1    | 0    | 0    | 0    | 0         | 0    | 2    | 0    | 0    | 0    | 0    | 0    | 2    | 0    | 0    | 0    | 0    | 2    | 0    | 0    | 0    | 0    | 0    | 0    |      |
| IPI00746968       | 15 kDa protein                                                     | S 21   | 100% (72.00)            | 1.0000                                | 4         | 3  | 0       | 2         | 0    | 0    | 0    | 0    | 0    | 0    | 1    | 0    | 0    | 0    | 0    | 0    | 1    | 0    | 0         | 0    | 0    | 2    | 0    | 0    | 0    | 0    | 0    | 1    | 0    | 0    | 0    | 0    | 0    | 1    | 0    | 0    | 0    | 0    |      |
| IPI00746976       | Dynamin-like protein DYN-11 variant                                | S 605  | 100% (92.76)            | 1.0000                                | 14        | 23 | 0       | 2         | 2    | 0    | 0    | 0    | 0    | 0    | 3    | 2    | 0    | 0    | 0    | 0    | 2    | 3    | 0         | 0    | 0    | 0    | 2    | 3    | 0    | 2    | 0    | 0    | 4    | 2    | 0    | 1    | 0    | 0    | 5    | 3    | 0    | 1    | 0    |
| IPI00747047       | Treacle major isoform                                              | S 446  | 100% (57.71)            | 1.0000                                | 0         | 2  | 0       | 0         | 0    | 0    | 0    | 0    | 0    | 0    | 0    | 0    | 0    | 0    | 0    | 0    | 0    | 0    | 0         | 0    | 0    | 0    | 0    | 0    | 0    | 0    | 0    | 1    | 0    | 0    | 0    | 1    | 0    | 0    | 0    | 0    | 0    |      |      |
| IPI00747047       | Treacle major isoform                                              | S 906  | 100% (1,000.00)         | 1.0000                                | 8         | 10 | 1       | 2         | 2    | 0    | 0    | 0    | 0    | 1    | 0    | 1    | 0    | 0    | 0    | 0    | 1    |      |           |      |      |      |      |      |      |      |      |      |      |      |      |      |      |      |      |      |      |      |      |





Supplemental Table 3. A list of phosphorylation sites and their counts in SNU216 and SNU216-LR.

| Protein accession | Protein name                                                            | Site   | Best Ascore <sup>1</sup> | Localization Probability <sup>2</sup> | Total No. |           | SNU216 |      |      |      |      |      |      |      |      |      |      |      |      |      |      |      |      |      | SNU216-LR |      |      |      |      |      |      |      |      |      |      |      |      |      |      |      |      |      |   |   |   |   |   |   |   |
|-------------------|-------------------------------------------------------------------------|--------|--------------------------|---------------------------------------|-----------|-----------|--------|------|------|------|------|------|------|------|------|------|------|------|------|------|------|------|------|------|-----------|------|------|------|------|------|------|------|------|------|------|------|------|------|------|------|------|------|---|---|---|---|---|---|---|
|                   |                                                                         |        |                          |                                       | SNU 216   | SNU 216LR | 1_01   | 2_01 | 3_01 | 4_01 | 5_01 | 6_01 | 1_02 | 2_02 | 3_02 | 4_02 | 5_02 | 6_02 | 1_03 | 2_03 | 3_03 | 4_03 | 5_03 | 6_03 | 1_01      | 2_01 | 3_01 | 4_01 | 5_01 | 6_01 | 1_02 | 2_02 | 3_02 | 4_02 | 5_02 | 6_02 | 1_03 | 2_03 | 3_03 | 4_03 | 5_03 | 6_03 |   |   |   |   |   |   |   |
| IPI00013788       | HIV TAT specific factor 1                                               | S 529  | 100% (66.80)             | 1.0000                                | * 3       | * 4       | 0      | 1    | 0    | 0    | 0    | 0    | 0    | 0    | 1    | 0    | 0    | 0    | 0    | 0    | 0    | 0    | 0    | 0    | 1         | 0    | 0    | 0    | 0    | 0    | 0    | 0    | 0    | 0    | 0    | 0    | 0    | 0    | 0    | 0    | 0    | 0    | 0 | 0 | 0 | 0 | 0 | 0 | 0 |
| IPI00104050       | Thyroid hormone receptor-associated protein 3                           | S 408  | 100% (67.18)             | 1.0000                                | * 5       | * 6       | 1      | 1    | 0    | 0    | 0    | 0    | 0    | 0    | 1    | 0    | 0    | 0    | 0    | 0    | 0    | 0    | 0    | 1    | 1         | 0    | 0    | 0    | 0    | 0    | 0    | 0    | 0    | 0    | 0    | 0    | 0    | 0    | 0    | 0    | 0    | 0    | 0 | 0 | 0 | 0 | 0 | 0 | 0 |
| IPI00107113       | Isoform 1 of U3 small nucleolar RNA-associated protein 14 homolog A     | S 31   | 100% (33.54)             | 1.0000                                | * 4       | * 5       | 0      | 1    | 0    | 0    | 0    | 0    | 0    | 0    | 1    | 0    | 0    | 0    | 0    | 0    | 0    | 0    | 0    | 0    | 2         | 0    | 0    | 0    | 0    | 0    | 0    | 0    | 0    | 0    | 0    | 0    | 0    | 0    | 0    | 0    | 0    | 0    | 0 | 0 | 0 | 0 | 0 | 0 | 0 |
| IPI00168849       | Cdc42-interaction protein 4 long isoform                                | S 351  | 100% (66.80)             | 1.0000                                | * 8       | * 5       | 0      | 1    | 1    | 0    | 0    | 0    | 0    | 0    | 1    | 1    | 0    | 0    | 0    | 0    | 0    | 0    | 0    | 0    | 2         | 2    | 0    | 0    | 0    | 0    | 0    | 0    | 0    | 0    | 0    | 0    | 0    | 0    | 0    | 0    | 0    | 0    | 0 | 0 | 0 | 0 | 0 | 0 | 0 |
| IPI00216546       | Isoform 2 of Probable palmitoyltransferase ZDHHC5                       | S 568  | 100% (65.50)             | 1.0000                                | * 4       | * 5       | 1      | 0    | 0    | 0    | 0    | 0    | 0    | 0    | 1    | 0    | 0    | 0    | 0    | 0    | 0    | 0    | 0    | 1    | 1         | 0    | 0    | 0    | 0    | 0    | 0    | 0    | 0    | 0    | 0    | 0    | 0    | 0    | 0    | 0    | 0    | 0    | 0 | 0 | 0 | 0 | 0 | 0 |   |
| IPI00219360       | Isoform SMN-delta5 of Survival motor neuron protein                     | S 31   | 100% (72.73)             | 1.0000                                | * 3       | * 8       | 0      | 0    | 0    | 0    | 0    | 0    | 0    | 0    | 0    | 1    | 0    | 0    | 0    | 0    | 0    | 0    | 0    | 0    | 0         | 0    | 0    | 2    | 0    | 0    | 0    | 0    | 0    | 0    | 0    | 0    | 0    | 0    | 0    | 0    | 0    | 0    | 0 | 0 | 0 | 0 | 0 | 0 |   |
| IPI00219793       | Isoform 2 of Suppressor of SWI4 1 homolog                               | S 359  | 100% (65.44)             | 1.0000                                | * 10      | * 14      | 0      | 1    | 1    | 1    | 1    | 0    | 0    | 0    | 0    | 1    | 1    | 0    | 1    | 0    | 1    | 0    | 0    | 1    | 1         | 0    | 0    | 0    | 0    | 0    | 0    | 0    | 0    | 0    | 0    | 0    | 0    | 0    | 0    | 0    | 0    | 0    | 0 | 0 | 0 | 0 | 0 | 0 |   |
| IPI00299824       | Isoform 1 of Connector enhancer of kinase suppressor of ras 1           | S 314  | 100% (65.44)             | 1.0000                                | * 3       | * 2       | 0      | 1    | 0    | 0    | 0    | 0    | 0    | 0    | 0    | 1    | 0    | 0    | 0    | 0    | 0    | 0    | 0    | 0    | 0         | 0    | 0    | 0    | 0    | 0    | 0    | 0    | 0    | 0    | 0    | 0    | 0    | 0    | 0    | 0    | 0    | 0    | 0 | 0 | 0 | 0 | 0 | 0 |   |
| IPI00328272       | Isoform 1 of Probable palmitoyltransferase ZDHHC5                       | S 621  | 100% (65.50)             | 1.0000                                | * 4       | * 5       | 1      | 0    | 0    | 0    | 0    | 0    | 0    | 0    | 1    | 0    | 0    | 0    | 0    | 0    | 0    | 0    | 0    | 0    | 0         | 0    | 0    | 0    | 0    | 0    | 0    | 0    | 0    | 0    | 0    | 0    | 0    | 0    | 0    | 0    | 0    | 0    | 0 | 0 | 0 | 0 | 0 | 0 |   |
| IPI00329590       | Isoform 1 of Suppressor of SWI4 1 homolog                               | S 359  | 100% (65.44)             | 1.0000                                | * 10      | * 14      | 0      | 1    | 1    | 1    | 1    | 0    | 0    | 0    | 0    | 1    | 1    | 0    | 1    | 0    | 1    | 0    | 0    | 0    | 0         | 0    | 0    | 0    | 0    | 0    | 0    | 0    | 0    | 0    | 0    | 0    | 0    | 0    | 0    | 0    | 0    | 0    | 0 | 0 | 0 | 0 | 0 | 0 |   |
| IPI00411614       | WD repeat and HMG-box DNA-binding protein 1                             | S 868  | 100% (66.16)             | 1.0000                                | * 13      | * 12      | 1      | 3    | 0    | 0    | 0    | 0    | 0    | 2    | 2    | 0    | 0    | 0    | 0    | 0    | 0    | 0    | 0    | 0    | 2         | 2    | 0    | 1    | 0    | 0    | 0    | 0    | 0    | 0    | 0    | 0    | 0    | 0    | 0    | 0    | 0    | 0    | 0 | 0 | 0 | 0 | 0 | 0 |   |
| IPI00451417       | Isoform 2 of Connector enhancer of kinase suppressor of ras 1           | S 307  | 100% (65.44)             | 1.0000                                | * 3       | * 2       | 0      | 1    | 0    | 0    | 0    | 0    | 0    | 0    | 1    | 0    | 0    | 0    | 0    | 0    | 0    | 0    | 0    | 0    | 0         | 0    | 0    | 0    | 0    | 0    | 0    | 0    | 0    | 0    | 0    | 0    | 0    | 0    | 0    | 0    | 0    | 0    | 0 | 0 | 0 | 0 | 0 |   |   |
| IPI00472094       | Isoform 3 of Microtubule-associated protein 2                           | S 281  | 100% (33.25)             | 1.0000                                | * 6       | * 4       | 1      | 1    | 0    | 0    | 0    | 0    | 0    | 2    | 1    | 0    | 0    | 0    | 0    | 0    | 0    | 0    | 0    | 0    | 0         | 0    | 0    | 0    | 0    | 0    | 0    | 0    | 0    | 0    | 0    | 0    | 0    | 0    | 0    | 0    | 0    | 0    | 0 | 0 | 0 | 0 | 0 |   |   |
| IPI00479124       | 52 kDa protein                                                          | S 359  | 100% (65.44)             | 1.0000                                | * 10      | * 14      | 0      | 1    | 1    | 1    | 1    | 0    | 0    | 0    | 0    | 1    | 1    | 0    | 1    | 0    | 1    | 0    | 0    | 0    | 0         | 0    | 0    | 0    | 0    | 0    | 0    | 0    | 0    | 0    | 0    | 0    | 0    | 0    | 0    | 0    | 0    | 0    | 0 | 0 | 0 | 0 | 0 | 0 |   |
| IPI00513835       | WD repeat and HMG-box DNA binding protein 1 isoform 2                   | S 745  | 100% (66.16)             | 1.0000                                | * 13      | * 12      | 1      | 3    | 0    | 0    | 0    | 0    | 0    | 2    | 2    | 0    | 0    | 0    | 0    | 0    | 0    | 0    | 0    | 0    | 0         | 0    | 0    | 0    | 0    | 0    | 0    | 0    | 0    | 0    | 0    | 0    | 0    | 0    | 0    | 0    | 0    | 0    | 0 | 0 | 0 | 0 | 0 | 0 |   |
| IPI00641364       | PPAN-P2RY11 protein                                                     | S 359  | 100% (65.44)             | 1.0000                                | * 10      | * 14      | 0      | 1    | 1    | 1    | 1    | 0    | 0    | 0    | 1    | 1    | 0    | 1    | 0    | 1    | 0    | 0    | 0    | 0    | 0         | 0    | 0    | 0    | 0    | 0    | 0    | 0    | 0    | 0    | 0    | 0    | 0    | 0    | 0    | 0    | 0    | 0    | 0 | 0 | 0 | 0 | 0 | 0 |   |
| IPI00748353       | 126 kDa protein                                                         | S 868  | 100% (66.16)             | 1.0000                                | * 13      | * 12      | 1      | 3    | 0    | 0    | 0    | 0    | 0    | 2    | 2    | 0    | 0    | 0    | 0    | 0    | 0    | 0    | 0    | 0    | 0         | 0    | 0    | 0    | 0    | 0    | 0    | 0    | 0    | 0    | 0    | 0    | 0    | 0    | 0    | 0    | 0    | 0    | 0 | 0 | 0 | 0 | 0 | 0 |   |
| IPI00005139       | Isoform 1 of Retinoblastoma-like protein 1                              | S 640  | 100% (32.69)             | 1.0000                                | * 3       | * 5       | 0      | 1    | 1    | 0    | 0    | 0    | 0    | 0    | 1    | 0    | 0    | 0    | 0    | 0    | 0    | 0    | 0    | 0    | 0         | 0    | 0    | 0    | 0    | 0    | 0    | 0    | 0    | 0    | 0    | 0    | 0    | 0    | 0    | 0    | 0    | 0    | 0 | 0 | 0 | 0 | 0 |   |   |
| IPI00011635       | Isoform 2 of Bcl-2-like 13 protein                                      | S 444  | 100% (32.69)             | 1.0000                                | * 7       | * 5       | 0      | 0    | 2    | 0    | 1    | 0    | 0    | 0    | 0    | 1    | 1    | 0    | 0    | 0    | 0    | 0    | 0    | 0    | 0         | 0    | 0    | 0    | 0    | 0    | 0    | 0    | 0    | 0    | 0    | 0    | 0    | 0    | 0    | 0    | 0    | 0    | 0 | 0 | 0 | 0 | 0 | 0 |   |
| IPI00145593       | Nucleolar protein with MIF4G domain 1                                   | S 320  | 100% (33.45)             | 1.0000                                | * 2       | * 3       | 0      | 0    | 0    | 0    | 0    | 0    | 0    | 0    | 0    | 1    | 0    | 0    | 0    | 0    | 0    | 0    | 0    | 0    | 0         | 0    | 0    | 0    | 0    | 0    | 0    | 0    | 0    | 0    | 0    | 0    | 0    | 0    | 0    | 0    | 0    | 0    | 0 | 0 | 0 | 0 | 0 |   |   |
| IPI00183794       | zinc finger protein 265 isoform 2                                       | S 188  | 100% (65.44)             | 1.0000                                | * 8       | * 13      | 0      | 0    | 0    | 2    | 0    | 0    | 0    | 0    | 0    | 0    | 0    | 0    | 0    | 0    | 0    | 0    | 0    | 0    | 0         | 0    | 0    | 0    | 0    | 0    | 0    | 0    | 0    | 0    | 0    | 0    | 0    | 0    | 0    | 0    | 0    | 0    | 0 | 0 | 0 | 0 | 0 |   |   |
| IPI00289082       | Tyrosine-protein phosphatase non-receptor type 12                       | S 673  | 100% (32.69)             | 1.0000                                | * 2       | * 2       | 0      | 0    | 0    | 0    | 0    | 0    | 0    | 0    | 0    | 1    | 0    | 0    | 0    | 0    | 0    | 0    | 0    | 0    | 0         | 0    | 0    | 0    | 0    | 0    | 0    | 0    | 0    | 0    | 0    | 0    | 0    | 0    | 0    | 0    | 0    | 0    | 0 | 0 | 0 | 0 | 0 |   |   |
| IPI00290652       | remodeling and spacing factor 1                                         | S 1223 | 100% (41.57)             | 1.0000                                | * 1       | * 2       | 1      | 0    | 0    | 0    | 0    | 0    | 0    | 0    | 0    | 0    | 0    | 0    | 0    | 0    | 0    | 0    | 0    | 0    | 0         | 0    | 0    | 0    | 0    | 0    | 0    | 0    | 0    | 0    | 0    | 0    | 0    | 0    | 0    | 0    | 0    | 0    | 0 | 0 | 0 | 0 | 0 |   |   |
| IPI00328293       | SerineW/arginine repetitive matrix 1                                    | S 547  | 100% (32.69)             | 1.0000                                | * 1       | * 1       | 1      | 0    | 0    | 0    | 0    | 0    | 0    | 0    | 0    | 0    | 0    | 0    | 0    | 0    | 0    | 0    | 0    | 0    | 0         | 0    | 0    | 0    | 0    | 0    | 0    | 0    | 0    | 0    | 0    | 0    | 0    | 0    | 0    | 0    | 0    | 0    | 0 | 0 | 0 | 0 | 0 |   |   |
| IPI00328867       | Isoform 2 of Proto-oncogene tyrosine-protein kinase Src                 | S 16   | 100% (68.98)             | 1.0000                                | * 8       | * 15      | 0      | 0    | 1    | 0    | 0    | 0    | 0    | 0    | 1    | 1    | 0    | 0    | 0    | 0    | 0    | 0    | 0    | 0    | 0         | 0    | 0    | 0    | 0    | 0    | 0    | 0    | 0    | 0    | 0    | 0    | 0    | 0    | 0    | 0    | 0    | 0    | 0 | 0 | 0 | 0 | 0 |   |   |
| IPI00375494       | Isoform 2 of Retinoblastoma-like protein 1                              | S 640  | 100% (32.69)             | 1.0000                                | * 3       | * 5       | 0      | 1    | 1    | 0    | 0    | 0    | 0    | 0    | 0    | 1    | 0    | 0    | 0    | 0    | 0    | 0    | 0    | 0    | 0         | 0    | 0    | 0    | 0    | 0    | 0    | 0    | 0    | 0    | 0    | 0    | 0    | 0    | 0    | 0    | 0    | 0    | 0 | 0 | 0 | 0 | 0 |   |   |
| IPI00427522       | Isoform 1 of Peroxisome proliferator-activated receptor-binding protein | S 1207 | 100% (64.35)             | 1.0000                                | 0         | * 1       | 0      | 0    | 0    | 0    | 0    | 0    | 0    | 0    | 0    | 0    | 0    | 0    | 0    | 0    | 0    | 0    | 0    | 0    | 0         | 0    | 0    | 0    | 0    | 0    | 0    | 0    | 0    | 0    | 0    | 0    | 0    | 0    | 0    | 0    | 0    | 0    | 0 | 0 | 0 | 0 | 0 |   |   |
| IPI00457284       | hypothetical protein LOC23131                                           | S 1014 | 100% (32.56)             | 1.0000                                | * 2       | * 3       | 0      | 0    | 0    | 0    | 0    | 0    | 0    | 0    | 1    | 1    | 0    | 0    | 0    | 0    | 0    | 0    | 0    | 0    | 0         | 0    | 0    | 0    | 0    | 0    | 0    | 0    | 0    | 0    | 0    | 0    | 0    | 0    | 0    | 0    | 0    |      |   |   |   |   |   |   |   |

Supplemental Table 3. A list of phosphorylation sites and their counts in SNU216 and SNU216-LR.

| Protein accession | Protein name                                                                                      | Site   | Best Ascore <sup>1</sup> | Localization Probability <sup>2</sup> | Total No.                            |                                      | SNU216  |           |      |      |      |      |      |      |      |      |      |      |      |      |      |      |      |      | SNU216-LR |      |      |      |      |      |      |      |      |      |      |      |      |      |      |      |      |      |      |      |   |   |   |   |   |   |   |   |
|-------------------|---------------------------------------------------------------------------------------------------|--------|--------------------------|---------------------------------------|--------------------------------------|--------------------------------------|---------|-----------|------|------|------|------|------|------|------|------|------|------|------|------|------|------|------|------|-----------|------|------|------|------|------|------|------|------|------|------|------|------|------|------|------|------|------|------|------|---|---|---|---|---|---|---|---|
|                   |                                                                                                   |        |                          |                                       |                                      |                                      | SNU 216 | SNU 216LR | 1_01 | 2_01 | 3_01 | 4_01 | 5_01 | 6_01 | 1_02 | 2_02 | 3_02 | 4_02 | 5_02 | 6_02 | 1_03 | 2_03 | 3_03 | 4_03 | 5_03      | 6_03 | 1_01 | 2_01 | 3_01 | 4_01 | 5_01 | 6_01 | 1_02 | 2_02 | 3_02 | 4_02 | 5_02 | 6_02 | 1_03 | 2_03 | 3_03 | 4_03 | 5_03 | 6_03 |   |   |   |   |   |   |   |   |
| IPI00397590       | Isoform 2 of Serine/threonine-protein kinase WNK1                                                 | S 1783 | 100% (63.65)             | 1.0000                                | <div><div></div><div></div></div> 3  | <div><div></div><div></div></div> 5  | 1       | 0         | 0    | 0    | 0    | 0    | 0    | 1    | 0    | 0    | 0    | 0    | 0    | 0    | 0    | 1    | 0    | 0    | 0         | 0    | 0    | 2    | 0    | 0    | 0    | 0    | 0    | 2    | 0    | 0    | 0    | 0    | 0    | 0    | 0    | 0    | 0    | 0    | 0 | 0 | 0 | 0 | 0 | 0 |   |   |
| IPI00412441       | Hypothetical protein KIAA0261                                                                     | S 162  | 100% (69.71)             | 1.0000                                | <div><div></div><div></div></div> 13 | <div><div></div><div></div></div> 15 | 2       | 2         | 0    | 1    | 0    | 0    | 2    | 1    | 0    | 0    | 1    | 0    | 0    | 1    | 0    | 2    | 1    | 0    | 0         | 0    | 0    | 2    | 2    | 0    | 2    | 1    | 0    | 1    | 1    | 0    | 1    | 0    | 0    | 0    | 0    | 2    | 2    | 0    | 0 | 0 | 1 | 0 | 0 | 0 |   |   |
| IPI00444788       | CDNA FU44925 fis, clone BRAMY3014613, highly similar to Homo sapiens SH3-domain binding protein 1 | S 480  | 100% (63.65)             | 1.0000                                | <div><div></div><div></div></div> 9  | <div><div></div><div></div></div> 7  | 0       | 2         | 1    | 0    | 0    | 0    | 0    | 2    | 0    | 0    | 0    | 0    | 0    | 0    | 0    | 0    | 2    | 2    | 0         | 0    | 0    | 0    | 0    | 1    | 1    | 0    | 0    | 0    | 0    | 0    | 0    | 2    | 1    | 0    | 0    | 0    | 0    | 0    | 0 | 1 | 1 | 0 | 0 | 0 | 0 |   |
| IPI00445123       | CDNA FU44592 fis, clone BLADE2002310, highly similar to Homo sapiens SH3-domain binding protein 1 | S 458  | 100% (63.65)             | 1.0000                                | <div><div></div><div></div></div> 9  | <div><div></div><div></div></div> 7  | 0       | 2         | 1    | 0    | 0    | 0    | 0    | 2    | 0    | 0    | 0    | 0    | 0    | 0    | 0    | 0    | 2    | 2    | 0         | 0    | 0    | 0    | 0    | 1    | 1    | 0    | 0    | 0    | 0    | 0    | 2    | 1    | 0    | 0    | 0    | 0    | 0    | 0    | 0 | 0 | 1 | 1 | 0 | 0 | 0 | 0 |
| IPI00455210       | Isoform 2 of Chromodomain helicase-DNA-binding protein 4                                          | S 1565 | 100% (41.57)             | 1.0000                                | <div><div></div><div></div></div> 1  | <div><div></div><div></div></div> 1  | 0       | 0         | 1    | 0    | 0    | 0    | 0    | 0    | 0    | 0    | 0    | 0    | 0    | 0    | 0    | 1    | 0    | 0    | 0         | 0    | 0    | 0    | 0    | 0    | 0    | 0    | 0    | 0    | 1    | 0    | 0    | 0    | 0    | 0    | 0    | 0    | 0    | 0    | 0 | 0 | 0 | 0 | 0 | 0 |   |   |
| IPI00456744       | Isoform 1 of SH3 domain-binding protein 1                                                         | S 544  | 100% (63.65)             | 1.0000                                | <div><div></div><div></div></div> 9  | <div><div></div><div></div></div> 7  | 0       | 2         | 1    | 0    | 0    | 0    | 0    | 0    | 2    | 0    | 0    | 0    | 0    | 0    | 0    | 0    | 2    | 2    | 0         | 0    | 0    | 0    | 0    | 1    | 1    | 0    | 0    | 0    | 0    | 2    | 1    | 0    | 0    | 0    | 0    | 0    | 0    | 0    | 0 | 1 | 1 | 0 | 0 | 0 | 0 |   |
| IPI00552897       | Isoform 1 of Mediator of DNA damage checkpoint protein 1                                          | S 485  | 100% (63.78)             | 1.0000                                | <div><div></div><div></div></div> 2  | <div><div></div><div></div></div> 2  | 0       | 0         | 0    | 0    | 0    | 0    | 0    | 0    | 1    | 0    | 0    | 0    | 0    | 0    | 0    | 1    | 0    | 0    | 0         | 0    | 0    | 0    | 0    | 0    | 0    | 0    | 0    | 0    | 1    | 0    | 0    | 0    | 0    | 0    | 0    | 0    | 0    | 0    | 0 | 0 | 0 | 0 | 0 | 0 | 0 |   |
| IPI00641106       | 227 kDa protein                                                                                   | S 485  | 100% (63.78)             | 1.0000                                | <div><div></div><div></div></div> 2  | <div><div></div><div></div></div> 2  | 0       | 0         | 0    | 0    | 0    | 0    | 0    | 0    | 1    | 0    | 0    | 0    | 0    | 0    | 0    | 1    | 0    | 0    | 0         | 0    | 0    | 0    | 0    | 0    | 0    | 0    | 0    | 0    | 0    | 1    | 0    | 0    | 0    | 0    | 0    | 0    | 0    | 0    | 0 | 0 | 0 | 0 | 0 | 0 | 0 |   |
| IPI00644651       | EPB41L1 protein                                                                                   | S 648  | 100% (63.24)             | 1.0000                                | <div><div></div><div></div></div> 16 | <div><div></div><div></div></div> 9  | 1       | 2         | 0    | 1    | 0    | 0    | 3    | 3    | 0    | 0    | 0    | 0    | 0    | 0    | 1    | 3    | 1    | 1    | 0         | 0    | 0    | 0    | 1    | 3    | 0    | 0    | 0    | 0    | 0    | 2    | 0    | 1    | 0    | 0    | 0    | 0    | 0    | 2    | 0 | 0 | 0 | 0 | 0 | 0 | 0 |   |
| IPI00645608       | Interferon regulatory factor 2 binding protein 1 variant                                          | S 453  | 100% (69.71)             | 1.0000                                | <div><div></div><div></div></div> 8  | <div><div></div><div></div></div> 15 | 0       | 1         | 2    | 0    | 2    | 0    | 0    | 0    | 1    | 0    | 0    | 0    | 0    | 0    | 0    | 0    | 0    | 0    | 0         | 0    | 0    | 1    | 0    | 0    | 2    | 1    | 2    | 0    | 0    | 0    | 2    | 1    | 2    | 0    | 0    | 0    | 0    | 0    | 0 | 0 | 0 | 0 | 0 | 0 | 0 |   |
| IPI00647126       | Isoform 3 of Cleavage and polyadenylation specificity factor 6                                    | S 440  | 100% (63.11)             | 1.0000                                | <div><div></div><div></div></div> 2  | <div><div></div><div></div></div> 1  | 0       | 0         | 1    | 0    | 0    | 0    | 0    | 0    | 0    | 1    | 0    | 0    | 0    | 0    | 0    | 0    | 0    | 0    | 0         | 0    | 0    | 0    | 0    | 1    | 0    | 0    | 0    | 0    | 0    | 0    | 0    | 0    | 0    | 0    | 0    | 0    | 0    | 0    | 0 | 0 | 0 | 0 | 0 | 0 | 0 |   |
| IPI00743804       | 67 kDa protein                                                                                    | S 464  | 100% (63.65)             | 1.0000                                | <div><div></div><div></div></div> 9  | <div><div></div><div></div></div> 7  | 0       | 2         | 1    | 0    | 0    | 0    | 0    | 0    | 2    | 0    | 0    | 0    | 0    | 0    | 0    | 2    | 2    | 0    | 0         | 0    | 0    | 0    | 0    | 1    | 1    | 0    | 0    | 0    | 0    | 2    | 1    | 0    | 0    | 0    | 0    | 0    | 0    | 0    | 0 | 0 | 0 | 0 | 0 | 0 | 0 | 0 |
| IPI00744918       | FOE                                                                                               | S 121  | 100% (69.71)             | 1.0000                                | <div><div></div><div></div></div> 13 | <div><div></div><div></div></div> 15 | 2       | 2         | 0    | 1    | 0    | 0    | 2    | 1    | 0    | 0    | 0    | 1    | 0    | 0    | 2    | 1    | 0    | 0    |           |      |      |      |      |      |      |      |      |      |      |      |      |      |      |      |      |      |      |      |   |   |   |   |   |   |   |   |





Supplemental Table 3. A list of phosphorylation sites and their counts in SNU216 and SNU216-LR.

| Protein accession | Protein name                                        | Site   | Best Ascore <sup>1</sup> | Localization Probability <sup>2</sup> | Total No. |    | SNU216  |           |    |    |    |    |    |    |    |    |    |    |    |    |    |    |    |    | SNU216-LR |    |    |    |    |    |    |    |    |    |    |    |    |    |   |   |   |   |   |   |   |
|-------------------|-----------------------------------------------------|--------|--------------------------|---------------------------------------|-----------|----|---------|-----------|----|----|----|----|----|----|----|----|----|----|----|----|----|----|----|----|-----------|----|----|----|----|----|----|----|----|----|----|----|----|----|---|---|---|---|---|---|---|
|                   |                                                     |        |                          |                                       |           |    | SNU 216 | SNU 216LR | 01 | 01 | 01 | 01 | 01 | 01 | 01 | 02 | 02 | 02 | 02 | 02 | 02 | 03 | 03 | 03 | 03        | 03 | 03 | 03 | 03 | 03 | 03 | 03 | 03 | 03 | 03 | 03 | 03 | 03 |   |   |   |   |   |   |   |
| IP100001813       | CTD-binding SR-like protein rA9                     | S 1202 | 100% (28.11)             | 1.0000                                | 1         | 1  | 6       | 0         | 0  | 0  | 0  | 0  | 0  | 0  | 0  | 1  | 0  | 0  | 0  | 0  | 0  | 0  | 0  | 0  | 0         | 0  | 0  | 2  | 0  | 0  | 0  | 0  | 0  | 1  | 2  | 0  | 0  | 0  | 0 | 0 | 1 | 0 | 0 | 0 | 0 |
| IP100395337       | Isoform 1 of Pre-mRNA 3'-end-processing factor FIP1 | S 500  | 100% (56.05)             | 1.0000                                | 18        | 21 | 0       | 0         | 2  | 2  | 0  | 0  | 1  | 2  | 2  | 1  | 0  | 0  | 0  | 0  | 0  | 1  | 2  | 2  | 1         | 2  | 0  | 0  | 2  | 4  | 2  | 0  | 0  | 1  | 3  | 2  | 0  | 0  | 0 | 0 | 2 | 3 | 1 | 1 | 0 |
| IP100442150       | CDNA FLJ16420 fis, clone BRACE3003053. (Fragment)   | S 461  | 100% (31.27)             | 1.0000                                | 0         | 1  | 0       | 0         | 0  | 0  | 0  | 0  | 0  | 0  | 0  | 0  | 0  | 0  | 0  | 0  | 0  | 0  | 0  | 0  | 0         | 0  | 1  | 0  | 0  | 0  | 0  | 0  | 0  | 0  | 0  | 0  | 0  | 0  | 0 | 0 | 0 | 0 | 0 | 0 |   |
| IP100743778       | 76 kDa protein                                      | S 241  | 100% (63.28)             | 1.0000                                | 3         | 4  | 0       | 0         | 2  | 0  | 0  | 0  | 0  | 0  | 0  | 0  | 0  | 0  | 0  | 0  | 0  | 0  | 0  | 0  | 0         | 0  | 0  | 0  | 0  | 0  | 0  | 0  | 0  | 0  | 0  | 0  | 0  | 0  | 0 | 0 | 0 | 0 | 0 | 0 |   |
| IP100024062       | Band 4.1-like protein 1                             | S 650  | 100% (55.92)             | 1.0000                                | 22        | 17 | 2       | 3         | 0  | 1  | 0  | 0  | 2  | 4  | 0  | 1  | 0  | 0  | 0  | 0  | 0  | 3  | 4  | 0  | 1         | 1  | 0  | 2  | 5  | 0  | 0  | 0  | 0  | 2  | 3  | 0  | 1  | 0  | 0 | 2 | 2 | 0 | 0 | 0 |   |
| IP100644651       | EPB41L1 protein                                     | S 650  | 100% (55.92)             | 1.0000                                | 22        | 17 | 2       | 3         | 0  | 1  | 0  | 0  | 2  | 4  | 0  | 1  | 0  | 0  | 0  | 0  | 0  | 3  | 4  | 0  | 1         | 1  | 0  | 2  | 5  | 0  | 0  | 0  | 0  | 2  | 3  | 0  | 1  | 0  | 0 | 2 | 2 | 0 | 0 | 0 |   |
| IP100002579       | RB-binding protein                                  | S 1593 | 100% (27.96)             | 1.0000                                | 1         | 0  | 0       | 0         | 0  | 0  | 0  | 0  | 0  | 0  | 0  | 0  | 0  | 0  | 0  | 0  | 0  | 0  | 0  | 0  | 0         | 0  | 0  | 0  | 0  | 0  | 0  | 0  | 0  | 0  | 0  | 0  | 0  | 0  | 0 | 0 | 0 | 0 | 0 |   |   |
| IP100167909       | EML3 protein                                        | S 176  | 100% (27.96)             | 1.0000                                | 5         | 2  | 1       | 1         | 0  | 0  | 0  | 0  | 0  | 1  | 1  | 0  | 0  | 0  | 0  | 0  | 0  | 1  | 0  | 0  | 0         | 0  | 0  | 0  | 0  | 0  | 0  | 0  | 0  | 0  | 0  | 0  | 0  | 0  | 0 | 0 | 0 | 0 | 0 | 0 |   |
| IP100216540       | Isoform 4 of Protein kinase C-binding protein 1     | S 30   | 100% (27.96)             | 1.0000                                | 6         | 5  | 2       | 0         | 1  | 0  | 0  | 0  | 1  | 0  | 1  | 0  | 0  | 0  | 0  | 0  | 0  | 1  | 0  | 0  | 0         | 0  | 0  | 1  | 1  | 1  | 0  | 0  | 0  | 0  | 0  | 0  | 0  | 0  | 0 | 0 | 0 | 0 | 0 | 0 |   |
| IP100291922       | Proteasome subunit alpha type 5                     | S 16   | 100% (27.96)             | 1.000                                 |           |    |         |           |    |    |    |    |    |    |    |    |    |    |    |    |    |    |    |    |           |    |    |    |    |    |    |    |    |    |    |    |    |    |   |   |   |   |   |   |   |

Supplemental Table 3. A list of phosphorylation sites and their counts in SNU216 and SNU216-LR.

| Protein accession | Protein name                                  | Site   | Best Ascore <sup>1</sup> | Localization Probability <sup>2</sup> | Total No. |           | SNU216 |      |      |      |      |      |      |      |      |      |      |      |      |      |      |      |      |      | SNU216-LR |      |      |      |      |      |      |      |      |      |      |      |      |      |      |      |      |      |   |   |
|-------------------|-----------------------------------------------|--------|--------------------------|---------------------------------------|-----------|-----------|--------|------|------|------|------|------|------|------|------|------|------|------|------|------|------|------|------|------|-----------|------|------|------|------|------|------|------|------|------|------|------|------|------|------|------|------|------|---|---|
|                   |                                               |        |                          |                                       | SNU 216   | SNU 216LR | 1_01   | 2_01 | 3_01 | 4_01 | 5_01 | 6_01 | 1_02 | 2_02 | 3_02 | 4_02 | 5_02 | 6_02 | 1_03 | 2_03 | 3_03 | 4_03 | 5_03 | 6_03 | 1_01      | 2_01 | 3_01 | 4_01 | 5_01 | 6_01 | 1_02 | 2_02 | 3_02 | 4_02 | 5_02 | 6_02 | 1_03 | 2_03 | 3_03 | 4_03 | 5_03 | 6_03 |   |   |
| IPI00412676       | CDNA FLJ43339 fis, clone NT2R13007291         | S 364  | 100% (27.16)             | 1.0000                                | 0         | 1         | 0      | 0    | 0    | 0    | 0    | 0    | 0    | 0    | 0    | 0    | 0    | 0    | 0    | 0    | 0    | 0    | 0    | 0    | 0         | 0    | 1    | 0    | 0    | 0    | 0    | 0    | 0    | 0    | 0    | 0    | 0    | 0    | 0    | 0    | 0    | 0    | 0 | 0 |
| IPI00515042       | cingulin                                      | S 155  | 100% (27.16)             | 1.0000                                | 1         | 1         | 0      | 0    | 0    | 0    | 0    | 0    | 1    | 0    | 0    | 0    | 0    | 0    | 0    | 0    | 0    | 0    | 0    | 0    | 0         | 0    | 0    | 0    | 0    | 0    | 0    | 1    | 0    | 0    | 0    | 0    | 0    | 0    | 0    | 0    | 0    | 0    | 0 | 0 |
| IPI00554761       | Nonhistone chromosomal protein HMG-14         | S 98   | 100% (57.29)             | 1.0000                                | 2         | 3         | 0      | 0    | 0    | 0    | 1    | 0    | 0    | 0    | 0    | 0    | 1    | 0    | 0    | 0    | 0    | 0    | 0    | 0    | 0         | 0    | 0    | 0    | 0    | 0    | 1    | 0    | 0    | 0    | 0    | 1    | 0    | 0    | 0    | 0    | 0    | 0    | 1 | 0 |
| IPI00744988       | ankyrin repeat domain 11                      | S 835  | 100% (27.16)             | 1.0000                                | 0         | 1         | 0      | 0    | 0    | 0    | 0    | 0    | 0    | 0    | 0    | 0    | 0    | 0    | 0    | 0    | 0    | 0    | 0    | 0    | 1         | 0    | 0    | 0    | 0    | 0    | 0    | 0    | 0    | 0    | 0    | 0    | 0    | 0    | 0    | 0    | 0    | 0    | 0 | 0 |
| IPI00012199       | Hypothetical protein FLJ22321                 | S 69   | 100% (54.08)             | 1.0000                                | 3         | 4         | 0      | 0    | 1    | 0    | 0    | 0    | 0    | 0    | 1    | 0    | 0    | 0    | 0    | 0    | 1    | 0    | 0    | 0    | 0         | 0    | 0    | 0    | 0    | 0    | 0    | 1    | 1    | 0    | 0    | 0    | 0    | 0    | 0    | 2    | 0    | 0    | 0 |   |
| IPI00293485       | 275 kDa protein                               | S 1581 | 100% (27.05)             | 1.0000                                | 1         | 3         | 0      | 0    | 0    | 0    | 0    | 0    | 0    | 0    | 0    | 0    | 0    | 0    | 1    | 0    | 0    | 0    | 0    | 0    | 1         | 0    | 0    | 0    | 0    | 0    | 1    | 0    | 0    | 0    | 0    | 0    | 1    | 0    | 0    | 0    | 0    | 0    | 0 | 0 |
| IPI00375454       | Isoform 2 of Telomere-associated protein RIF1 | S 1581 | 100% (27.05)             | 1.0000                                | 1         | 3         | 0      | 0    | 0    | 0    | 0    | 0    | 0    | 0    | 0    | 0    | 0    | 0    | 1    | 0    | 0    | 0    | 0    | 0    | 1         | 0    | 0    | 0    | 0    | 0    | 1    | 0    | 0    | 0    | 0    | 0    | 1    | 0    | 0    | 0    | 0    | 0    | 0 | 0 |
| IPI00477805       | Isoform 1 of Telomere-associated protein RIF1 | S 1579 | 100% (27.05)             | 1.0000                                | 1         | 3         | 0      | 0    | 0    | 0    | 0    | 0    | 0    | 0    | 0    | 0    | 0    | 0    | 1    | 0    | 0    | 0    | 0    | 0    | 1         | 0    | 0    | 0    | 0    | 0    | 1    | 0    | 0    | 0    | 0    | 0    | 1    | 0    | 0    | 0    | 0    | 0    | 0 | 0 |
| IPI00013721       | Serine/threonine-protein kinase PRP4 homolog  | S 32   | 100% (49.79)             | 1.0000                                | 7         | 8         | 2      | 1    | 0    | 0    | 0    | 0    | 1    | 0    | 0    | 0    | 0    | 0    | 3    | 0    | 0    | 0    | 0    | 0    | 3         | 1    | 0    | 0    | 0    | 0    | 2    | 1    | 0    | 0    | 0    | 0    | 0    | 1    | 0    | 0    | 0    | 0    | 0 | 0 |
| IPI00021518       | Isoform 1 of DNA damage-binding protein 2     | S 24   |                          |                                       |           |           |        |      |      |      |      |      |      |      |      |      |      |      |      |      |      |      |      |      |           |      |      |      |      |      |      |      |      |      |      |      |      |      |      |      |      |      |   |   |

Supplemental Table 3. A list of phosphorylation sites and their counts in SNU216 and SNU216-LR.

| Protein accession | Protein name                                                 | Site  | Best Ascore <sup>1</sup> | Localization Probability <sup>2</sup> | Total No. |    | SNU216  |           |      |      |      |      |      |      |      |      |      |      |      |      |      |      |      |      | SNU216-LR |      |      |      |      |      |      |      |      |      |      |      |      |      |      |      |      |      |      |      |   |   |   |   |
|-------------------|--------------------------------------------------------------|-------|--------------------------|---------------------------------------|-----------|----|---------|-----------|------|------|------|------|------|------|------|------|------|------|------|------|------|------|------|------|-----------|------|------|------|------|------|------|------|------|------|------|------|------|------|------|------|------|------|------|------|---|---|---|---|
|                   |                                                              |       |                          |                                       |           |    | SNU 216 | SNU 216LR | 1_01 | 2_01 | 3_01 | 4_01 | 5_01 | 6_01 | 1_02 | 2_02 | 3_02 | 4_02 | 5_02 | 6_02 | 1_03 | 2_03 | 3_03 | 4_03 | 5_03      | 6_03 | 1_01 | 2_01 | 3_01 | 4_01 | 5_01 | 6_01 | 1_02 | 2_02 | 3_02 | 4_02 | 5_02 | 6_02 | 1_03 | 2_03 | 3_03 | 4_03 | 5_03 | 6_03 |   |   |   |   |
| IP100024062       | Band 4.1-like protein 1                                      | S 784 | 100% (26.31)             | 1.0000                                | 5         | 1  | 9       | 0         | 0    | 0    | 0    | 1    | 0    | 1    | 2    | 0    | 0    | 0    | 0    | 0    | 0    | 0    | 1    | 0    | 0         | 0    | 0    | 1    | 2    | 0    | 0    | 1    | 0    | 0    | 1    | 0    | 0    | 1    | 0    | 1    | 0    | 1    | 2    | 0    | 0 | 0 | 0 |   |
| IP100045914       | Msx2-interacting protein                                     | S 727 | 100% (26.31)             | 1.0000                                | 1         | 1  | 1       | 1         | 0    | 0    | 0    | 0    | 0    | 0    | 0    | 0    | 0    | 0    | 0    | 0    | 0    | 0    | 0    | 0    | 0         | 0    | 0    | 0    | 0    | 0    | 0    | 0    | 0    | 0    | 0    | 0    | 0    | 0    | 0    | 0    | 0    | 0    | 0    | 0    |   |   |   |   |
| IP100216919       | YAP1 protein                                                 | S 61  | 100% (26.31)             | 1.0000                                | 17        | 16 | 1       | 1         | 1    | 1    | 1    | 0    | 0    | 0    | 1    | 2    | 2    | 1    | 0    | 0    | 2    | 2    | 2    | 1    | 0         | 0    | 2    | 2    | 2    | 1    | 0    | 0    | 0    | 2    | 2    | 1    | 0    | 0    | 1    | 1    | 1    | 0    | 0    | 1    | 2 | 2 | 0 | 0 |
| IP100297900       | Probable ATP-dependent RNA helicase DDX10                    | S 539 | 100% (26.31)             | 1.0000                                | 2         | 2  | 0       | 0         | 0    | 0    | 0    | 0    | 0    | 0    | 1    | 0    | 0    | 0    | 0    | 0    | 0    | 1    | 0    | 0    | 0         | 0    | 1    | 0    | 0    | 0    | 0    | 0    | 0    | 1    | 0    | 0    | 0    | 0    | 0    | 0    | 0    | 0    | 0    | 0    | 0 | 0 |   |   |
| IP100306382       | Isoform 1 of Secretory carrier-associated membrane protein 3 | S 76  | 100% (26.31)             | 1.0000                                | 3         | 1  | 0       | 1         | 0    | 1    | 0    | 1    | 0    | 0    | 0    | 0    | 0    | 0    | 0    | 0    | 0    | 0    | 1    | 0    | 0         | 0    | 0    | 0    | 0    | 0    | 0    | 0    | 0    | 0    | 0    | 0    | 0    | 0    | 0    | 0    | 0    | 1    | 0    | 0    | 0 | 0 |   |   |
| IP100394829       | hypothetical protein LOC286077                               | S 925 | 100% (26.31)             | 1.0000                                | 5         | 5  | 1       | 1         | 1    | 0    | 0    | 0    | 0    | 1    | 0    | 1    | 0    | 1    | 0    | 0    | 0    | 0    | 0    | 0    | 0         | 0    | 0    | 0    | 1    | 0    | 0    | 0    | 1    | 1    | 0    | 0    | 0    | 0    | 1    | 1    | 0    | 0    | 0    | 0    | 0 | 0 |   |   |
| IP100419100       | Isoform 1 of FYVE, RhoGEF and PH domain-containing protein 6 | S 605 | 100% (26.31)             | 1.0000                                | 2         | 1  | 0       | 1         | 0    | 0    | 0    | 0    | 0    | 0    | 0    | 0    | 0    | 0    | 0    | 0    | 0    | 1    | 0    | 0    | 0         | 0    | 0    | 0    | 0    | 0    | 0    | 0    | 1    | 0    | 0    | 0    | 0    | 0    | 0    | 0    | 0    | 0    | 0    | 0    | 0 | 0 |   |   |
| IP100453116       | secretory carrier membrane protein 3 isoform 1               | S 76  | 100% (26.31)             | 1.0000                                | 3         | 1  | 0       | 1         | 0    | 1    | 0    | 1    | 0    | 0    | 0    | 0    | 0    | 0    | 0    | 0    | 0    | 0    | 0    | 0    | 0         | 0    | 0    | 0    | 0    | 0    | 0    | 0    | 0    | 0    | 0    | 0    | 0    | 0    | 0    | 0    | 0    | 0    | 1    | 0    | 0 | 0 | 0 | 0 |
| IP100479205       | 38 kDa protein                                               | S 76  | 100% (26.31)             | 1.0000                                | 3         | 1  | 0       | 1         | 0    | 1    | 0    | 1    | 0    | 0    | 0    | 0    | 0    | 0    | 0    | 0    | 0    | 0    | 1    | 0    | 0         | 0    | 0    | 0    |      |      |      |      |      |      |      |      |      |      |      |      |      |      |      |      |   |   |   |   |



Supplemental Table 3. A list of phosphorylation sites and their counts in SNU216 and SNU216-LR.

| Protein accession | Protein name                                                                           | Site   | Best Ascore <sup>1</sup> | Localization Probability <sup>2</sup> | Total No. |           | SNU216 |      |      |      |      |      |      |      |      |      |      |      |      |      |      |      |      |      | SNU216-LR |      |      |      |      |      |      |      |      |      |      |      |      |      |      |      |      |      |   |
|-------------------|----------------------------------------------------------------------------------------|--------|--------------------------|---------------------------------------|-----------|-----------|--------|------|------|------|------|------|------|------|------|------|------|------|------|------|------|------|------|------|-----------|------|------|------|------|------|------|------|------|------|------|------|------|------|------|------|------|------|---|
|                   |                                                                                        |        |                          |                                       | SNU 216   | SNU 216LR | 1_01   | 2_01 | 3_01 | 4_01 | 5_01 | 6_01 | 1_02 | 2_02 | 3_02 | 4_02 | 5_02 | 6_02 | 1_03 | 2_03 | 3_03 | 4_03 | 5_03 | 6_03 | 1_01      | 2_01 | 3_01 | 4_01 | 5_01 | 6_01 | 1_02 | 2_02 | 3_02 | 4_02 | 5_02 | 6_02 | 1_03 | 2_03 | 3_03 | 4_03 | 5_03 | 6_03 |   |
| IPI00013721       | Serine/threonine-protein kinase PRP4 homolog                                           | S 23   | 100% (49.06)             | 1.0000                                | 8         | 9         | 1      | 1    | 0    | 0    | 0    | 0    | 1    | 2    | 0    | 0    | 0    | 0    | 0    | 2    | 1    | 0    | 0    | 0    | 0         | 1    | 1    | 0    | 0    | 0    | 0    | 2    | 2    | 0    | 0    | 0    | 0    | 2    | 1    | 0    | 0    | 0    | 0 |
| IPI00032107       | Sulfate transporter                                                                    | S 16   | 100% (52.06)             | 1.0000                                | 17        | 1         | 4      | 1    | 0    | 0    | 0    | 0    | 3    | 4    | 0    | 0    | 0    | 0    | 3    | 2    | 0    | 0    | 0    | 0    | 0         | 0    | 0    | 0    | 0    | 0    | 0    | 1    | 0    | 0    | 0    | 0    | 0    | 0    | 0    | 0    | 0    | 0    |   |
| IPI00412993       | CDNA FLJ36874 f1s, clone ASTRO2018169, weakly similar to Oocyte- specific protein P100 | S 41   | 100% (40.04)             | 1.0000                                | 3         | 3         | 0      | 1    | 0    | 0    | 0    | 0    | 0    | 0    | 1    | 0    | 0    | 0    | 0    | 1    | 0    | 0    | 0    | 0    | 0         | 0    | 0    | 1    | 0    | 0    | 0    | 1    | 0    | 0    | 0    | 0    | 0    | 0    | 0    | 1    | 0    | 0    | 0 |
| IPI00454969       | PHD finger protein 14                                                                  | S 208  | 100% (51.96)             | 1.0000                                | 9         | 8         | 0      | 2    | 0    | 0    | 0    | 0    | 2    | 2    | 0    | 0    | 0    | 0    | 1    | 2    | 0    | 0    | 0    | 0    | 0         | 2    | 0    | 0    | 0    | 0    | 2    | 0    | 0    | 0    | 0    | 0    | 0    | 2    | 2    | 0    | 0    | 0    | 0 |
| IPI00465287       | ras responsive element binding protein 1 isoform 2                                     | S 161  | 100% (52.00)             | 1.0000                                | 3         | 7         | 1      | 0    | 0    | 0    | 0    | 0    | 1    | 0    | 0    | 1    | 0    | 0    | 0    | 0    | 0    | 0    | 0    | 0    | 2         | 1    | 0    | 0    | 0    | 0    | 1    | 0    | 1    | 0    | 0    | 0    | 1    | 0    | 1    | 0    | 0    | 0    |   |
| IPI00465288       | ras responsive element binding protein 1 isoform 1                                     | S 161  | 100% (52.00)             | 1.0000                                | 3         | 7         | 1      | 0    | 0    | 0    | 0    | 0    | 1    | 0    | 0    | 1    | 0    | 0    | 0    | 0    | 0    | 0    | 0    | 0    | 2         | 1    | 0    | 0    | 0    | 0    | 1    | 0    | 1    | 0    | 0    | 0    | 1    | 0    | 1    | 0    | 0    | 0    |   |
| IPI00472782       | PHD finger protein 14 isoform 1                                                        | S 208  | 100% (51.96)             | 1.0000                                | 9         | 8         | 0      | 2    | 0    | 0    | 0    | 0    | 2    | 2    | 0    | 0    | 0    | 0    | 1    | 2    | 0    | 0    | 0    | 0    | 0         | 2    | 0    | 0    | 0    | 0    | 2    | 0    | 0    | 0    | 0    | 0    | 2    | 2    | 0    | 0    | 0    | 0    |   |
| IPI00328293       | SerineW/arginine repetitive matrix 1                                                   | S 616  | 100% (37.54)             | 1.0000                                | 1         | 2         | 0      | 0    | 0    | 0    | 0    | 0    | 0    | 1    | 0    | 0    | 0    | 0    | 0    | 0    | 0    | 0    | 0    | 0    | 0         | 0    | 0    | 0    | 0    | 0    | 1    | 0    | 0    | 0    | 0    | 0    | 1    | 0    | 0    | 0    | 0    | 0    |   |
| IPI00425560       | Isoform 1 of LAP4 protein                                                              | S 1220 | 100% (47.17)             | 1.0000                                | 6         | 6         | 1      | 1    | 1    | 1    | 0    | 0    | 0    | 0    | 0    | 1    | 0    | 0    | 0    | 1    | 0    | 0    | 0    | 0    | 1         | 1    | 0    | 1    | 0    | 0    | 0    | 1    | 0    | 0    | 0    | 0    | 1    | 1    | 0    | 0    | 0    | 0    | 0 |
| IPI00425566       | Isoform 4 of LAP4 protein                                                              | S 1220 | 100% (47.17)             | 1.0000                                | 6         | 6         | 1      | 1    |      |      |      |      |      |      |      |      |      |      |      |      |      |      |      |      |           |      |      |      |      |      |      |      |      |      |      |      |      |      |      |      |      |      |   |



Supplemental Table 3. A list of phosphorylation sites and their counts in SNU216 and SNU216-LR.

| Protein accession | Protein name                                                    | Site  | Best AScore <sup>1</sup> | Localization Probability <sup>2</sup> | Total No. |    | SNU216  |           |      |      |      |      |      |      |      |      |      |      |      |      |      |      |      |      | SNU216-LR |      |      |      |      |      |      |      |      |      |      |      |      |      |      |      |      |      |      |      |   |   |   |
|-------------------|-----------------------------------------------------------------|-------|--------------------------|---------------------------------------|-----------|----|---------|-----------|------|------|------|------|------|------|------|------|------|------|------|------|------|------|------|------|-----------|------|------|------|------|------|------|------|------|------|------|------|------|------|------|------|------|------|------|------|---|---|---|
|                   |                                                                 |       |                          |                                       |           |    | SNU 216 | SNU 216LR | 1_01 | 2_01 | 3_01 | 4_01 | 5_01 | 6_01 | 1_02 | 2_02 | 3_02 | 4_02 | 5_02 | 6_02 | 1_03 | 2_03 | 3_03 | 4_03 | 5_03      | 6_03 | 1_01 | 2_01 | 3_01 | 4_01 | 5_01 | 6_01 | 1_02 | 2_02 | 3_02 | 4_02 | 5_02 | 6_02 | 1_03 | 2_03 | 3_03 | 4_03 | 5_03 | 6_03 |   |   |   |
| IPI00004671       | Golgin subfamily B member 1                                     | S 17  | 100% (46.62)             | 1.0000                                | 2         | 6  | 2       | 0         | 0    | 0    | 0    | 0    | 0    | 0    | 0    | 0    | 0    | 0    | 0    | 0    | 0    | 0    | 0    | 0    | 0         | 2    | 0    | 0    | 0    | 0    | 0    | 2    | 0    | 0    | 0    | 0    | 0    | 2    | 0    | 0    | 0    | 0    | 0    | 0    | 0 | 0 | 0 |
| IPI00006038       | Isoform 1 of Nuclear pore complex protein Nup98-Nup96 precursor | S 888 | 100% (46.62)             | 1.0000                                | 17        | 17 | 1       | 2         | 0    | 1    | 2    | 0    | 1    | 2    | 0    | 1    | 2    | 0    | 1    | 2    | 0    | 1    | 2    | 0    | 0         | 2    | 1    | 2    | 0    | 1    | 2    | 0    | 1    | 2    | 0    | 1    | 1    | 0    | 2    | 1    | 0    | 1    | 2    | 0    | 0 |   |   |
| IPI00021518       | Isoform 1 of DNA damage-binding protein 2                       | S 26  | 100% (23.30)             | 1.0000                                | 20        | 21 | 2       | 2         | 2    | 3    | 0    | 0    | 1    | 1    | 2    | 3    | 0    | 0    | 2    | 1    | 0    | 1    | 0    | 1    | 0         | 0    | 3    | 1    | 2    | 2    | 0    | 0    | 3    | 0    | 2    | 3    | 0    | 0    | 2    | 1    | 1    | 1    | 0    | 0    |   |   |   |
| IPI00028122       | Isoform 1 of PC4 and SFRS1-interacting protein                  | S 275 | 100% (51.23)             | 1.0000                                | 10        | 9  | 0       | 1         | 2    | 1    | 0    | 0    | 0    | 0    | 2    | 1    | 2    | 0    | 0    | 0    | 1    | 0    | 0    | 0    | 0         | 0    | 2    | 1    | 1    | 0    | 0    | 0    | 1    | 0    | 2    | 0    | 0    | 0    | 1    | 0    | 1    | 0    | 0    | 0    |   |   |   |
| IPI00446284       | Isoform D3 of DNA damage-binding protein 2                      | S 26  | 100% (23.30)             | 1.0000                                | 20        | 21 | 2       | 2         | 2    | 3    | 0    | 0    | 1    | 1    | 2    | 3    | 0    | 0    | 2    | 1    | 0    | 1    | 0    | 1    | 0         | 0    | 3    | 1    | 2    | 2    | 0    | 0    | 3    | 0    | 2    | 3    | 0    | 0    | 2    | 1    | 1    | 1    | 0    | 0    |   |   |   |
| IPI00549348       | Isoform D1 of DNA damage-binding protein 2                      | S 26  | 100% (23.30)             | 1.0000                                | 20        | 21 | 2       | 2         | 2    | 3    | 0    | 0    | 1    | 1    | 2    | 3    | 0    | 0    | 2    | 1    | 0    | 1    | 0    | 1    | 0         | 0    | 3    | 1    | 2    | 2    | 0    | 0    | 3    | 0    | 2    | 3    | 0    | 0    | 2    | 1    | 1    | 1    | 0    | 0    |   |   |   |
| IPI00607674       | Isoform D2 of DNA damage-binding protein 2                      | S 26  | 100% (23.30)             | 1.0000                                | 20        | 21 | 2       | 2         | 2    | 3    | 0    | 0    | 1    | 1    | 2    | 3    | 0    | 0    | 2    | 1    | 0    | 1    | 0    | 1    | 0         | 0    | 3    | 1    | 2    | 2    | 0    | 0    | 3    | 0    | 2    | 3    | 0    | 0    | 2    | 1    | 1    | 1    | 0    | 0    |   |   |   |
| IPI00607727       | Isoform D4 of DNA damage-binding protein 2                      | S 26  | 100% (23.30)             | 1.0000                                | 20        | 21 | 2       | 2         | 2    | 3    | 0    | 0    | 1    | 1    | 2    | 3    | 0    | 0    | 2    | 1    | 0    | 1    | 0    | 1    | 0         | 0    | 3    | 1    | 2    | 2    | 0    | 0    | 3    | 0    | 2    | 3    | 0    | 0    | 2    | 1    | 1    | 1    | 0    | 0    |   |   |   |
| IPI00045914       | Msx2-interacting protein                                        | S 736 | 100% (40.19)             | 1.0000                                | 2         | 4  | 0       | 0         | 0    | 0    | 0    | 0    | 1    | 0    | 0    | 0    | 0    | 0    | 0    | 0    | 1    | 0    | 0    | 0    | 0         | 2    | 0    | 0    | 0    | 0    | 0    | 1    | 0    | 0    | 0    | 0    | 0    | 0    | 1    | 0    | 0    | 0    | 0    | 0    |   |   |   |
| IPI000211         |                                                                 |       |                          |                                       |           |    |         |           |      |      |      |      |      |      |      |      |      |      |      |      |      |      |      |      |           |      |      |      |      |      |      |      |      |      |      |      |      |      |      |      |      |      |      |      |   |   |   |

Supplemental Table 3. A list of phosphorylation sites and their counts in SNU216 and SNU216-LR.

| Protein accession | Protein name                                                 | Site   | Best Ascore <sup>1</sup> | Localization Probability <sup>2</sup> | Total No. |           | SNU216 |      |      |      |      |      |      |      |      |      |      |      |      |      |      |      |      |      | SNU216-LR |      |      |      |      |      |      |      |      |      |      |      |      |      |      |      |      |      |   |   |   |
|-------------------|--------------------------------------------------------------|--------|--------------------------|---------------------------------------|-----------|-----------|--------|------|------|------|------|------|------|------|------|------|------|------|------|------|------|------|------|------|-----------|------|------|------|------|------|------|------|------|------|------|------|------|------|------|------|------|------|---|---|---|
|                   |                                                              |        |                          |                                       | SNU 216   | SNU 216LR | 1_01   | 2_01 | 3_01 | 4_01 | 5_01 | 6_01 | 1_02 | 2_02 | 3_02 | 4_02 | 5_02 | 6_02 | 1_03 | 2_03 | 3_03 | 4_03 | 5_03 | 6_03 | 1_01      | 2_01 | 3_01 | 4_01 | 5_01 | 6_01 | 1_02 | 2_02 | 3_02 | 4_02 | 5_02 | 6_02 | 1_03 | 2_03 | 3_03 | 4_03 | 5_03 | 6_03 |   |   |   |
| IPI00005036       | RNA-binding protein 5                                        | S 624  | 100% (28.96)             | 1.0000                                | 10        | 10        | 1      | 2    | 0    | 1    | 0    | 0    | 1    | 1    | 0    | 1    | 0    | 0    | 0    | 1    | 2    | 0    | 0    | 0    | 0         | 1    | 2    | 0    | 1    | 0    | 0    | 1    | 2    | 0    | 0    | 0    | 0    | 0    | 1    | 2    | 0    | 0    | 0 | 0 | 0 |
| IPI00103090       | Hypothetical protein LEO1                                    | S 300  | 100% (26.31)             | 1.0000                                | 6         | 4         | 0      | 2    | 0    | 0    | 0    | 0    | 0    | 2    | 0    | 0    | 0    | 0    | 0    | 0    | 0    | 0    | 0    | 0    | 0         | 2    | 0    | 0    | 0    | 0    | 0    | 0    | 0    | 0    | 0    | 0    | 0    | 0    | 0    | 0    | 0    | 0    | 0 | 0 | 0 |
| IPI00328293       | SerineW/arginine repetitive matrix 1                         | S 722  | 100% (45.01)             | 1.0000                                | 2         | 1         | 1      | 0    | 0    | 0    | 0    | 0    | 0    | 1    | 0    | 0    | 0    | 0    | 0    | 0    | 0    | 0    | 0    | 0    | 0         | 0    | 0    | 0    | 0    | 0    | 0    | 0    | 0    | 0    | 0    | 0    | 0    | 0    | 0    | 0    | 0    | 0    | 0 | 0 | 0 |
| IPI00029019       | Ubiquitin-associated protein 2-like                          | S 469  | 100% (53.53)             | 1.0000                                | 6         | 9         | 1      | 0    | 0    | 0    | 0    | 0    | 1    | 1    | 1    | 0    | 0    | 0    | 0    | 1    | 1    | 0    | 0    | 0    | 0         | 0    | 1    | 0    | 0    | 0    | 0    | 0    | 1    | 1    | 1    | 1    | 0    | 0    | 1    | 1    | 1    | 1    | 0 | 0 | 0 |
| IPI00412535       | 115 kDa protein                                              | S 469  | 100% (53.53)             | 1.0000                                | 6         | 9         | 1      | 0    | 0    | 0    | 0    | 0    | 1    | 1    | 1    | 0    | 0    | 0    | 0    | 1    | 1    | 0    | 0    | 0    | 0         | 0    | 1    | 0    | 0    | 0    | 0    | 0    | 1    | 1    | 1    | 1    | 0    | 0    | 1    | 1    | 1    | 1    | 0 | 0 | 0 |
| IPI00514856       | Ubiquitin associated protein 2-like                          | S 467  | 100% (53.53)             | 1.0000                                | 6         | 9         | 1      | 0    | 0    | 0    | 0    | 0    | 1    | 1    | 1    | 0    | 0    | 0    | 0    | 1    | 1    | 0    | 0    | 0    | 0         | 0    | 1    | 0    | 0    | 0    | 0    | 0    | 1    | 1    | 1    | 1    | 0    | 0    | 1    | 1    | 1    | 1    | 0 | 0 | 0 |
| IPI00329236       | Protein kinase C delta type                                  | S 664  | 100% (45.03)             | 1.0000                                | 0         | 1         | 1      | 0    | 0    | 0    | 0    | 0    | 0    | 0    | 0    | 0    | 0    | 0    | 0    | 0    | 0    | 0    | 0    | 0    | 0         | 0    | 1    | 0    | 0    | 0    | 0    | 0    | 0    | 0    | 0    | 0    | 0    | 0    | 0    | 0    | 0    | 0    | 0 | 0 | 0 |
| IPI00384562       | protein kinase C, delta                                      | S 664  | 100% (45.03)             | 1.0000                                | 0         | 1         | 1      | 0    | 0    | 0    | 0    | 0    | 0    | 0    | 0    | 0    | 0    | 0    | 0    | 0    | 0    | 0    | 0    | 0    | 0         | 0    | 1    | 0    | 0    | 0    | 0    | 0    | 0    | 0    | 0    | 0    | 0    | 0    | 0    | 0    | 0    | 0    | 0 | 0 | 0 |
| IPI00185919       | Isoform 1 of La-related protein 1                            | S 627  | 100% (49.79)             | 1.0000                                | 20        | 19        | 0      | 5    | 0    | 0    | 0    | 0    | 4    | 4    | 0    | 0    | 0    | 0    | 0    | 0    | 2    | 5    | 0    | 0    | 0         | 3    | 5    | 0    | 0    | 0    | 0    | 2    | 4    | 0    | 0    | 0    | 0    | 2    | 3    | 0    | 0    | 0    | 0 | 0 |   |
| IPI00186711       | plectin 1 isoform 6                                          | S 720  | 100% (45.03)             | 1.0000                                | 7         | 6         | 1      | 0    | 0    | 0    | 0    | 0    | 2    | 1    | 0    | 0    | 0    | 0    | 0    | 2    | 1    | 0    | 0    | 0    | 2         | 1    | 0    | 0    | 0    | 0    | 2    | 1    | 0    | 0    | 0    | 0    | 2    | 0    | 0    | 0    | 0    | 1    | 0 | 0 | 0 |
| IPI00298731       | Serine/threonine-protein phosphatase 1 regulatory subunit 10 | S 313  | 100% (45.01)             | 1.0000                                | 7         | 7         | 0      | 1    | 0    | 0    | 0    | 0    | 0    | 2    | 0    | 0    | 0    | 0    | 0    | 0    | 3    | 1    | 0    | 0    | 0         | 2    | 0    | 0    | 0    | 0    | 0    | 0    | 3    | 0    | 0    | 0    | 0    | 0    | 0    | 2    | 0    | 0    | 0 | 0 |   |
| IPI00398002       | plectin 1 isoform 1                                          | S 610  | 100% (45.03)             | 1.0000                                | 7         | 6         | 1      | 0    | 0    | 0    | 0    | 0    | 2    | 1    | 0    | 0    | 0    | 0    | 0    | 2    | 1    | 0    | 0    | 0    | 2         | 1    | 0    | 0    | 0    | 0    | 2    | 1    | 0    | 0    | 0    | 0    | 2    | 0    | 0    | 0    | 0    | 1    | 0 | 0 | 0 |
| IPI00398779       | plectin 1 isoform 11                                         | S 583  | 100% (45.03)             | 1.0000                                | 7         | 6         | 1      | 0    | 0    | 0    | 0    | 0    | 2    | 1    | 0    | 0    | 0    | 0    | 0    | 2    | 1    | 0    | 0    | 0    | 2         | 1    | 0    | 0    | 0    | 0    | 2    | 1    | 0    | 0    | 0    | 0    | 0    | 0    | 0    | 0    | 1    | 0    | 0 | 0 |   |
| IPI00514311       | CTTNBP2 N-terminal-like protein                              | S 488  | 100% (45.01)             | 1.0000                                | 14        | 8         | 1      | 1    | 3    | 1    | 0    | 0    | 1    | 0    | 2    | 1    | 1    | 0    | 1    | 1    | 0    | 1    | 0    | 0    | 0         | 1    | 0    | 1    | 0    | 0    | 1    | 1    | 0    | 0    | 0    | 0    | 1    | 1    | 1    | 1    | 1    | 0    | 0 | 0 |   |
| IPI00027035       | XPA-binding protein 1                                        | S 338  | 100% (45.01)             | 1.0000                                | 7         | 6         | 0      | 0    | 0    | 0    | 2    | 0    | 0    | 0    | 0    | 0    | 2    | 0    | 0    | 1    | 0    | 0    | 0    | 0    | 1         | 2    | 0    | 0    | 0    | 0    | 0    | 0    | 0    | 0    | 0    | 0    | 0    | 0    | 0    | 0    | 0    | 2    | 0 | 0 |   |
| IPI00029795       | Isoform 4 of Nuclear factor 1 C-type                         | S 339  | 100% (49.76)             | 1.0000                                | 13        | 16        | 0      | 0    | 3    | 3    | 0    | 0    | 0    | 0    | 1    | 3    | 0    | 0    | 0    | 0    | 1    | 2    | 0    | 0    | 0         | 0    | 2    | 3    | 0    | 0    | 0    | 0    | 4    | 3    | 0    | 0    | 0    | 0    | 4    | 3    | 0    | 0    | 0 | 2 | 0 |
| IPI00218035       | Isoform 1 of Nuclear factor 1 C-type                         | S 330  | 100% (49.76)             | 1.0000                                | 13        | 16        | 0      | 0    | 3    | 3    | 0    | 0    | 0    | 0    | 1    | 3    | 0    | 0    | 0    | 0    | 1    | 2    | 0    | 0    | 0         | 0    | 2    | 3    | 0    | 0    | 0    | 0    | 4    | 3    | 0    | 0    | 0    | 0    | 0    | 2    | 2    | 0    | 0 | 0 |   |
| IPI00218037       | Isoform 2 of Nuclear factor 1 C-type                         | S 330  | 100% (49.76)             | 1.0000                                | 13        | 16        | 0      | 0    | 3    | 3    | 0    | 0    | 0    | 0    | 1    | 3    | 0    | 0    | 0    | 0    | 1    | 2    | 0    | 0    | 0         | 0    | 2    | 3    | 0    | 0    | 0    | 0    | 4    | 3    | 0    | 0    | 0    | 0    | 0    | 2    | 2    | 0    | 0 | 0 |   |
| IPI00218039       | Isoform 3 of Nuclear factor 1 C-type                         | S 306  | 100% (49.76)             | 1.0000                                | 13        | 16        | 0      | 0    | 3    | 3    | 0    | 0    | 0    | 0    | 1    | 3    | 0    | 0    | 0    | 0    | 1    | 2    | 0    | 0    | 0         | 0    | 2    | 3    | 0    | 0    | 0    | 0    | 4    | 3    | 0    | 0    | 0    | 0    | 0    | 2    | 2    | 0    | 0 | 0 |   |
| IPI00218041       | Isoform 5 of Nuclear factor 1 C-type                         | S 339  | 100% (49.76)             | 1.0000                                | 13        | 16        | 0      | 0    | 3    | 3    | 0    | 0    | 0    | 0    | 1    | 3    | 0    | 0    | 0    | 0    | 1    | 2    | 0    | 0    | 0         | 0    | 2    | 3    | 0    | 0    | 0    | 0    | 4    | 3    | 0    | 0    | 0    | 0    | 0    | 2    | 2    | 0    | 0 | 0 |   |
| IPI00103090       | Hypothetical protein LEO1                                    | S 658  | 100% (22.45)             | 1.0000                                | 3         | 2         | 0      | 1    | 0    | 0    | 0    | 0    | 0    | 1    | 0    | 0    | 0    | 0    | 0    | 0    | 1    | 0    | 0    | 0    | 0         | 1    | 0    | 0    | 0    | 0    | 0    | 0    | 0    | 0    | 0    | 0    | 0    | 0    | 0    | 1    | 0    | 0    | 0 |   |   |
| IPI00176398       | Isoform 1 of SLIT and NTRK-like protein 6 precursor          | S 652  | 100% (47.84)             | 1.0000                                | 0         | 1         | 0      | 0    | 0    | 0    | 0    | 0    | 0    | 0    | 0    | 0    | 0    | 0    | 0    | 0    | 0    | 0    | 0    | 0    | 0         | 0    | 0    | 0    | 0    | 0    | 0    | 0    | 0    | 0    | 0    | 0    | 0    | 0    | 0    | 0    | 0    | 0    | 0 |   |   |
| IPI00477535       | DNA-repair protein complementing XP-G cells                  | S 156  | 100% (24.45)             | 1.0000                                | 2         | 0         | 1      | 0    | 0    | 0    | 0    | 0    | 1    | 0    | 0    | 0    | 0    | 0    | 0    | 0    | 0    | 0    | 0    | 0    | 0         | 0    | 0    | 0    | 0    | 0    | 0    | 0    | 0    | 0    | 0    | 0    | 0    | 0    | 0    | 0    | 0    | 0    | 0 | 0 |   |
| IPI00386700       | ladinin 1                                                    | S 121  | 100% (44.75)             | 1.0000                                | 1         | 2         | 0      | 0    | 0    | 0    | 0    | 0    | 0    | 0    | 0    | 0    | 0    | 0    | 0    | 0    | 1    | 0    | 0    | 0    | 0         | 0    | 1    | 0    | 0    | 0    | 0    | 0    | 0    | 0    | 0    | 0    | 0    | 0    | 0    | 0    | 0    | 1    | 0 | 0 |   |
| IPI00514234       | Ladinin 1                                                    | S 135  | 100% (44.75)             | 1.0000                                | 1         | 2         | 0      | 0    | 0    | 0    | 0    | 0    | 0    | 0    | 0    | 0    | 0    | 0    | 0    | 0    | 1    | 0    | 0    | 0    | 0         | 0    | 1    | 0    | 0    | 0    | 0    | 0    | 0    | 0    | 0    | 0    | 0    | 0    | 0    | 0    | 0    | 1    | 0 | 0 |   |
| IPI00017030       | Isoform 1 of Myosin-18A                                      | S 2023 | 100% (47.68)             | 1.0000                                | 7         | 5         | 2      | 0    | 0    | 0    | 0    | 0    | 3    | 0    | 0    | 0    | 0    | 0    | 0    | 2    | 0    | 0    | 0    | 0    | 2         | 0    | 0    | 0    | 0    | 2    | 0    | 0    | 0    | 0    | 0    | 0    | 0    | 0    | 0    | 2    | 0    | 0    | 0 | 0 |   |
| IPI00027157       | CENP-F kinetochore protein                                   | S 3150 | 100% (49.35)             | 1.0000                                | 3         | 5         | 1      | 0    | 0    | 0    | 0    | 0    | 0    | 1    | 0    | 0    | 0    | 0    | 0    | 0    | 1    | 0    | 0    | 0    | 0         | 1    | 0    | 0    | 0    | 0    | 0    | 1    | 0    | 0    | 0    | 0    | 0    | 0    | 0    | 3    | 0    | 0    | 0 | 0 |   |
| IPI00302592       | Filamin A, alpha                                             | S 1533 | 100% (49.35)             | 1.0000                                | 6         | 6         | 2      | 0    | 0    | 0    | 0    | 0    | 2    | 0    | 0    | 0    | 0    | 0    | 2    | 0    | 0    | 0    | 0    | 0    | 2         | 0    | 0    | 0    | 0    | 0    | 2    | 0    | 0    | 0    | 0    | 0    | 0    | 0    | 2    | 0    | 0    | 0    | 0 | 0 |   |
| IPI00333541       | Filamin-A                                                    | S 1532 | 100% (49.35)             | 1.0000                                | 6         | 6         | 2      | 0    | 0    | 0    | 0    | 0    | 2    | 0    | 0    | 0    | 0    | 0    | 0    | 2    | 0    | 0    | 0    | 0    | 0         | 2    | 0    | 0    | 0    | 0    | 2    | 0    | 0    | 0    | 0    | 0    | 0    | 0    | 2    | 0    | 0    | 0    | 0 | 0 |   |
| IPI00433194       | EHBP1 protein                                                | S 401  | 100% (49.35)             | 1.0000                                | 3         | 11        | 0      | 1    | 0    | 0    | 0    | 0    | 1    | 0    | 0    | 0    | 0    | 0    | 0    | 1    | 0    | 0    | 0    | 0    | 2         | 1    | 0    | 0    | 0    | 0    | 2    | 1    | 0    | 0    | 0    | 0    | 3    | 2    | 0    | 0    | 0    | 0    | 0 |   |   |
| IPI00748920       | splicing coactivator subunit SRm300                          | S 1732 | 100% (25.95)             | 1.0000                                | 4         | 3         | 1      | 0    | 0    | 0    | 0    | 0    | 1    | 0    | 0    | 0    | 0    | 0    | 0    |      |      |      |      |      |           |      |      |      |      |      |      |      |      |      |      |      |      |      |      |      |      |      |   |   |   |









Supplemental Table 3. A list of phosphorylation sites and their counts in SNU216 and SNU216-LR.

| Protein accession | Protein name                                                                                          | Site   | Best Ascore <sup>1</sup> | Localization Probability <sup>2</sup> | Total No. |    | SNU216  |           |      |      |      |      |      |      |      |      |      |      |      |      |      |      |      |      | SNU216-LR |      |      |      |      |      |      |      |      |      |      |      |      |      |      |      |      |      |      |      |   |   |   |
|-------------------|-------------------------------------------------------------------------------------------------------|--------|--------------------------|---------------------------------------|-----------|----|---------|-----------|------|------|------|------|------|------|------|------|------|------|------|------|------|------|------|------|-----------|------|------|------|------|------|------|------|------|------|------|------|------|------|------|------|------|------|------|------|---|---|---|
|                   |                                                                                                       |        |                          |                                       |           |    | SNU 216 | SNU 216LR | 1_01 | 2_01 | 3_01 | 4_01 | 5_01 | 6_01 | 1_02 | 2_02 | 3_02 | 4_02 | 5_02 | 6_02 | 1_03 | 2_03 | 3_03 | 4_03 | 5_03      | 6_03 | 1_01 | 2_01 | 3_01 | 4_01 | 5_01 | 6_01 | 1_02 | 2_02 | 3_02 | 4_02 | 5_02 | 6_02 | 1_03 | 2_03 | 3_03 | 4_03 | 5_03 | 6_03 |   |   |   |
| IPI00304875       | Isoform 1 of HIRA-interacting protein 3                                                               | S 332  | 100% (38.65)             | 0.9999                                | 3         | 1  | 0       | 1         | 1    | 0    | 0    | 0    | 0    | 0    | 0    | 1    | 0    | 0    | 0    | 0    | 0    | 0    | 0    | 0    | 0         | 0    | 0    | 0    | 1    | 0    | 0    | 0    | 0    | 0    | 0    | 0    | 0    | 0    | 0    | 0    | 0    | 0    | 0    | 0    | 0 | 0 | 0 |
| IPI00140450       | Thyroid hormone receptor-associated protein 3                                                         | S 939  | 100% (26.31)             | 0.9999                                | 19        | 16 | 3       | 3         | 0    | 0    | 0    | 0    | 3    | 5    | 0    | 0    | 0    | 0    | 0    | 0    | 2    | 3    | 0    | 0    | 0         | 0    | 2    | 2    | 0    | 0    | 0    | 0    | 2    | 5    | 0    | 0    | 0    | 0    | 2    | 3    | 0    | 0    | 0    | 0    | 0 | 0 |   |
| IPI00187011       | Zinc finger CCH-type domain-containing protein C19orf7                                                | S 1275 | 100% (41.57)             | 0.9999                                | 10        | 9  | 2       | 2         | 0    | 0    | 0    | 0    | 2    | 1    | 0    | 0    | 0    | 0    | 0    | 2    | 1    | 0    | 0    | 0    | 0         | 2    | 2    | 1    | 0    | 0    | 0    | 0    | 1    | 2    | 0    | 0    | 0    | 0    | 2    | 0    | 0    | 1    | 0    | 0    | 0 | 0 |   |
| IPI00020468       | Selenoprotein S                                                                                       | S 1440 | 100% (43.32)             | 0.9999                                | 4         | 6  | 0       | 0         | 0    | 0    | 0    | 1    | 0    | 0    | 0    | 0    | 0    | 1    | 0    | 0    | 0    | 0    | 0    | 0    | 2         | 0    | 0    | 0    | 0    | 0    | 0    | 2    | 0    | 0    | 0    | 0    | 0    | 1    | 0    | 0    | 0    | 0    | 0    | 3    | 0 | 0 |   |
| IPI00023340       | Histone acetyltransferase MYST3                                                                       | S 1113 | 100% (41.49)             | 0.9999                                | 2         | 1  | 1       | 0         | 0    | 0    | 0    | 0    | 0    | 1    | 0    | 0    | 0    | 0    | 0    | 0    | 0    | 0    | 0    | 0    | 0         | 0    | 0    | 0    | 0    | 0    | 0    | 0    | 0    | 0    | 0    | 0    | 0    | 0    | 0    | 0    | 0    | 0    | 0    | 0    | 0 | 0 |   |
| IPI00747970       | CDNA FLJ46465 fis, clone THYMU3022434, highly similar to Monocytic leukemia zinc finger protein. (Fra | S 693  | 100% (41.49)             | 0.9999                                | 2         | 1  | 1       | 0         | 0    | 0    | 0    | 0    | 0    | 1    | 0    | 0    | 0    | 0    | 0    | 0    | 0    | 0    | 0    | 0    | 0         | 0    | 0    | 0    | 0    | 0    | 0    | 0    | 0    | 0    | 0    | 0    | 0    | 0    | 0    | 0    | 0    | 0    | 0    | 0    | 0 | 0 | 0 |
| IPI00014537       | Calumenin precursor                                                                                   | S 43   | 100% (38.42)             | 0.9999                                | 6         | 2  | 0       | 0         | 0    | 2    | 0    | 0    | 0    | 0    | 0    | 0    | 2    | 0    | 0    | 0    | 0    | 0    | 0    | 0    | 2         | 0    | 0    | 0    | 0    | 0    | 0    | 0    | 0    | 0    | 0    | 0    | 0    | 1    | 0    | 0    | 0    | 0    | 0    | 1    | 0 | 0 |   |
| IPI00394829       | hypothetical protein LOC286077                                                                        | S 513  | 100% (38.16)             | 0.9999                                | 1         | 0  | 0       | 1         | 0    | 0    | 0    | 0    | 0    | 0    | 0    | 0    | 0    | 0    | 0    | 0    | 0    | 0    | 0    | 0    | 0         | 0    | 0    | 0    | 0    | 0    | 0    | 0    | 0    | 0    | 0    | 0    | 0    | 0    | 0    | 0    | 0    | 0    | 0    | 0    | 0 | 0 |   |
| IPI00010158       | Chromatin accessibility complex protein 1                                                             | S 124  | 100% (19.18)             | 0.9999                                | 8         | 15 | 0       | 0         | 0    | 0    | 3    | 0    | 0    | 0    |      |      |      |      |      |      |      |      |      |      |           |      |      |      |      |      |      |      |      |      |      |      |      |      |      |      |      |      |      |      |   |   |   |



Supplemental Table 3. A list of phosphorylation sites and their counts in SNU216 and SNU216-LR.

| Protein accession | Protein name                                        | Site   | Best Ascore <sup>1</sup> | Localization Probability <sup>2</sup> | Total No. |           | SNU216 |      |      |      |      |      |      |      |      |      |      |      |      |      |      |      |      |      | SNU216-LR |      |      |      |      |      |      |      |      |      |      |      |      |      |      |      |      |      |   |
|-------------------|-----------------------------------------------------|--------|--------------------------|---------------------------------------|-----------|-----------|--------|------|------|------|------|------|------|------|------|------|------|------|------|------|------|------|------|------|-----------|------|------|------|------|------|------|------|------|------|------|------|------|------|------|------|------|------|---|
|                   |                                                     |        |                          |                                       | SNU 216   | SNU 216LR | 1_01   | 2_01 | 3_01 | 4_01 | 5_01 | 6_01 | 1_02 | 2_02 | 3_02 | 4_02 | 5_02 | 6_02 | 1_03 | 2_03 | 3_03 | 4_03 | 5_03 | 6_03 | 1_01      | 2_01 | 3_01 | 4_01 | 5_01 | 6_01 | 1_02 | 2_02 | 3_02 | 4_02 | 5_02 | 6_02 | 1_03 | 2_03 | 3_03 | 4_03 | 5_03 | 6_03 |   |
| IP100431749       | Keratin b20                                         | S 451  | 100% (38.72)             | 0.9997                                | 0         | 3         | 0      | 0    | 0    | 0    | 0    | 0    | 0    | 0    | 0    | 0    | 0    | 0    | 0    | 0    | 0    | 0    | 0    | 0    | 0         | 0    | 0    | 1    | 0    | 0    | 0    | 0    | 0    | 0    | 1    | 0    | 0    | 0    | 0    | 0    | 1    | 0    | 0 |
| IP100293338       | SMCS structural maintenance of chromosomes 5-like 1 | S 35   | 100% (38.55)             | 0.9997                                | 4         | 1         | 1      | 0    | 0    | 0    | 0    | 0    | 1    | 1    | 0    | 0    | 0    | 0    | 0    | 1    | 0    | 0    | 0    | 0    | 0         | 1    | 0    | 0    | 0    | 0    | 0    | 0    | 0    | 0    | 0    | 0    | 0    | 0    | 0    | 0    | 0    | 0    | 0 |
| IP100413265       | SMCS protein                                        | S 35   | 100% (38.55)             | 0.9997                                | 4         | 1         | 1      | 0    | 0    | 0    | 0    | 0    | 1    | 1    | 0    | 0    | 0    | 0    | 0    | 1    | 0    | 0    | 0    | 0    | 0         | 1    | 0    | 0    | 0    | 0    | 0    | 0    | 0    | 0    | 0    | 0    | 0    | 0    | 0    | 0    | 0    | 0    | 0 |
| IP100218753       | Isoform 3 of DNA topoisomerase 2-alpha              | S 1561 | 100% (17.75)             | 0.9997                                | 1         | 1         | 0      | 0    | 0    | 0    | 0    | 0    | 1    | 0    | 0    | 0    | 0    | 0    | 0    | 0    | 0    | 0    | 0    | 0    | 0         | 0    | 0    | 0    | 0    | 0    | 0    | 0    | 0    | 0    | 0    | 0    | 0    | 0    | 0    | 0    | 0    | 0    | 0 |
| IP100218754       | Isoform 4 of DNA topoisomerase 2-alpha              | S 1606 | 100% (17.75)             | 0.9997                                | 1         | 1         | 0      | 0    | 0    | 0    | 0    | 0    | 1    | 0    | 0    | 0    | 0    | 0    | 0    | 0    | 0    | 0    | 0    | 0    | 0         | 0    | 0    | 0    | 0    | 0    | 0    | 0    | 0    | 0    | 0    | 0    | 0    | 0    | 0    | 0    | 0    | 0    | 0 |
| IP100414101       | Isoform 2 of DNA topoisomerase 2-alpha              | S 1552 | 100% (17.75)             | 0.9997                                | 1         | 1         | 0      | 0    | 0    | 0    | 0    | 0    | 1    | 0    | 0    | 0    | 0    | 0    | 0    | 0    | 0    | 0    | 0    | 0    | 0         | 0    | 0    | 0    | 0    | 0    | 0    | 0    | 0    | 0    | 0    | 0    | 0    | 0    | 0    | 0    | 0    | 0    | 0 |
| IP100478232       | Isoform 1 of DNA topoisomerase 2-alpha              | S 1562 | 100% (17.75)             | 0.9997                                | 1         | 1         | 0      | 0    | 0    | 0    | 0    | 0    | 1    | 0    | 0    | 0    | 0    | 0    | 0    | 0    | 0    | 0    | 0    | 0    | 0         | 0    | 0    | 0    | 0    | 0    | 0    | 0    | 0    | 0    | 0    | 0    | 0    | 0    | 0    | 0    | 0    | 0    | 0 |
| IP100375124       | Ubiquitin carboxyl-terminal hydrolase 42            | S 1166 | 100% (35.47)             | 0.9997                                | 1         | 2         | 0      | 0    | 0    | 0    | 0    | 0    | 1    | 0    | 0    | 0    | 0    | 0    | 0    | 0    | 0    | 0    | 0    | 0    | 0         | 1    | 0    | 0    | 0    | 0    | 0    | 0    | 1    | 0    | 0    | 0    | 0    | 0    | 0    | 0    | 0    | 0    |   |
| IP100748920       | splicing coactivator subunit Srm300                 | S 353  | 100% (29.40)             | 0.9997                                | 3         | 4         | 1      | 0    | 0    | 0    | 0    | 0    | 1    | 0    | 0    | 0    | 0    | 0    | 0    | 1    | 0    | 0    | 0    | 0    | 0         | 2    | 0    | 0    | 0    | 0    | 0    | 2    | 0    | 0    | 0    | 0    | 0    | 0    | 0    | 0    | 0    | 0    | 0 |
| IP100175146       | hypothetical protein LOC196441                      | S 1046 | 100% (38.26)             | 0.9997                                | 2         | 3         | 1      | 0    | 0    | 0    |      |      |      |      |      |      |      |      |      |      |      |      |      |      |           |      |      |      |      |      |      |      |      |      |      |      |      |      |      |      |      |      |   |











Supplemental Table 3. A list of phosphorylation sites and their counts in SNU216 and SNU216-LR.

| Protein accession | Protein name                                              | Site   | Best Ascore <sup>1</sup> | Localization Probability <sup>2</sup> | Total No. |    | SNU216  |           |      |      |      |      |      |      |      |      |      |      |      |      |      |      |      |      | SNU216-LR |      |      |      |      |      |      |      |      |      |      |      |      |      |      |      |      |      |      |      |   |   |   |
|-------------------|-----------------------------------------------------------|--------|--------------------------|---------------------------------------|-----------|----|---------|-----------|------|------|------|------|------|------|------|------|------|------|------|------|------|------|------|------|-----------|------|------|------|------|------|------|------|------|------|------|------|------|------|------|------|------|------|------|------|---|---|---|
|                   |                                                           |        |                          |                                       |           |    | SNU 216 | SNU 216LR | 1_01 | 2_01 | 3_01 | 4_01 | 5_01 | 6_01 | 1_02 | 2_02 | 3_02 | 4_02 | 5_02 | 6_02 | 1_03 | 2_03 | 3_03 | 4_03 | 5_03      | 6_03 | 1_01 | 2_01 | 3_01 | 4_01 | 5_01 | 6_01 | 1_02 | 2_02 | 3_02 | 4_02 | 5_02 | 6_02 | 1_03 | 2_03 | 3_03 | 4_03 | 5_03 | 6_03 |   |   |   |
| IPI003841776      | Isoform 1 of Protein polybromo-1                          | S 1453 | 100% (14.63)             | 0.9988                                | 2         | 3  | 0       | 0         | 0    | 0    | 0    | 0    | 0    | 0    | 1    | 0    | 0    | 0    | 0    | 0    | 0    | 1    | 0    | 0    | 0         | 0    | 0    | 1    | 0    | 0    | 0    | 0    | 0    | 0    | 1    | 0    | 0    | 0    | 0    | 0    | 1    | 0    | 0    | 0    | 0 | 0 | 0 |
| IPI004477498      | Isoform 1 of Glucocorticoid receptor DNA-binding factor 1 | S 589  | 100% (14.63)             | 0.9988                                | 0         | 3  | 0       | 0         | 0    | 0    | 0    | 0    | 0    | 0    | 0    | 0    | 0    | 0    | 0    | 0    | 0    | 0    | 0    | 0    | 0         | 0    | 1    | 0    | 0    | 0    | 0    | 0    | 0    | 1    | 0    | 0    | 0    | 0    | 0    | 1    | 0    | 0    | 0    | 0    | 0 | 0 |   |
| IPI00718985       | Isoform 2 of Glucocorticoid receptor DNA-binding factor 1 | S 589  | 100% (14.63)             | 0.9988                                | 0         | 3  | 0       | 0         | 0    | 0    | 0    | 0    | 0    | 0    | 0    | 0    | 0    | 0    | 0    | 0    | 0    | 0    | 0    | 0    | 0         | 0    | 1    | 0    | 0    | 0    | 0    | 0    | 0    | 1    | 0    | 0    | 0    | 0    | 0    | 1    | 0    | 0    | 0    | 0    | 0 | 0 |   |
| IPI00005146       | Hypothetical protein A-362G6.1                            | S 873  | 100% (29.27)             | 0.9988                                | 10        | 4  | 1       | 2         | 0    | 0    | 0    | 0    | 0    | 2    | 2    | 0    | 0    | 0    | 0    | 0    | 2    | 1    | 0    | 0    | 0         | 0    | 1    | 0    | 0    | 0    | 0    | 0    | 0    | 1    | 0    | 0    | 0    | 0    | 0    | 1    | 0    | 0    | 0    | 0    | 0 | 0 |   |
| IPI00154915       | Isoform 1 of Partitioning-defective 3 homolog             | S 852  | 100% (29.27)             | 0.9988                                | 1         | 0  | 0       | 1         | 0    | 0    | 0    | 0    | 0    | 0    | 0    | 0    | 0    | 0    | 0    | 0    | 0    | 0    | 0    | 0    | 0         | 0    | 0    | 0    | 0    | 0    | 0    | 0    | 0    | 0    | 0    | 0    | 0    | 0    | 0    | 0    | 0    | 0    | 0    | 0    | 0 | 0 |   |
| IPI00179063       | Isoform 4 of Partitioning-defective 3 homolog             | S 852  | 100% (29.27)             | 0.9988                                | 1         | 0  | 0       | 1         | 0    | 0    | 0    | 0    | 0    | 0    | 0    | 0    | 0    | 0    | 0    | 0    | 0    | 0    | 0    | 0    | 0         | 0    | 0    | 0    | 0    | 0    | 0    | 0    | 0    | 0    | 0    | 0    | 0    | 0    | 0    | 0    | 0    | 0    | 0    | 0    | 0 | 0 |   |
| IPI00291711       | pleckstrin homology domain containing, family G, member 3 | S 1025 | 100% (29.27)             | 0.9988                                | 0         | 3  | 0       | 0         | 0    | 0    | 0    | 0    | 0    | 0    | 0    | 0    | 0    | 0    | 0    | 0    | 0    | 0    | 0    | 0    | 0         | 0    | 1    | 0    | 0    | 0    | 0    | 0    | 0    | 1    | 0    | 0    | 0    | 0    | 0    | 1    | 0    | 0    | 0    | 0    | 0 | 0 |   |
| IPI00301595       | Isoform 2 of Partitioning-defective 3 homolog             | S 849  | 100% (29.27)             | 0.9988                                | 1         | 0  | 0       | 1         | 0    | 0    | 0    | 0    | 0    | 0    | 0    | 0    | 0    | 0    | 0    | 0    | 0    | 0    | 0    | 0    | 0         | 0    | 0    | 0    | 0    | 0    | 0    | 0    | 0    | 0    | 0    | 0    | 0    | 0    | 0    | 0    | 0    | 0    | 0    | 0    | 0 | 0 |   |
| IPI00301597       | Par-3 partitioning defective 3 homolog                    | S 792  | 100% (29.27)             | 0.9988                                | 1         | 0  | 0       | 1         | 0    | 0    | 0    | 0    | 0    | 0    | 0    | 0    | 0    | 0    | 0    | 0    | 0    | 0    | 0    | 0    | 0         | 0    | 0    | 0    | 0    | 0    | 0    | 0    | 0    | 0    | 0    | 0    | 0    | 0    | 0    | 0    | 0    | 0    | 0    | 0    | 0 | 0 |   |
| IPI00395663       | Ankyrin repeat and SAM domain-containing protein 1A       | S 662  | 100% (29.27)             | 0.9988                                | 8         | 5  | 1       | 1         | 1    | 0    | 0    | 0    | 0    | 1    | 1    | 0    | 0    | 0    | 0    | 0    | 1    | 1    | 1    | 0    | 0         | 0    | 1    | 1    | 0    | 0    | 0    | 0    | 0    | 1    | 0    | 0    | 0    | 0    | 0    | 1    | 1    | 0    | 0    | 0    | 0 | 0 |   |
| IPI00419693       | activating transcription factor 7 interacting protein     | S 559  | 100% (29.27)             | 0.9988                                | 5         | 2  | 1       | 1         | 0    | 0    | 0    | 0    | 1    | 1    | 0    | 0    | 0    | 0    | 0    | 0    | 1    | 0    | 0    | 0    | 0         | 0    | 1    | 0    | 0    | 0    | 0    | 0    | 0    | 1    | 0    | 0    | 0    | 0    | 0    | 0    | 0    | 0    | 0    | 0    | 0 | 0 |   |
| IPI00010338       | Tissue factor precursor                                   | S 290  | 100% (29.24)             | 0.9988                                | 2         | 7  | 0       | 0         | 0    | 0    | 0    | 0    | 0    | 0    | 0    | 0    | 0    | 1    | 0    | 0    | 0    | 0    | 0    | 0    | 1         | 0    | 0    | 0    | 0    | 1    | 0    | 0    | 0    | 1    | 1    | 0    | 0    | 0    | 0    | 1    | 1    | 0    | 0    | 2    | 1 | 0 |   |
| IPI00029778       | Isoform 1 of Tumor suppressor p53-binding protein 1       | S 552  | 100% (32.22)             | 0.9988                                | 14        | 14 | 2       | 1         | 0    | 0    | 0    | 0    | 0    | 4    | 1    | 0    | 0    | 0    | 0    | 4    | 2    | 0    | 0    | 0    | 0         | 0    | 0    | 0    | 0    | 0    | 0    | 0    | 0    | 2    | 0    | 0    | 0    | 0    | 0    | 0    | 0    | 0    | 0    | 0    | 0 | 0 |   |
| IPI00742743       | Isoform 2 of Tumor suppressor p53-binding protein 1</     |        |                          |                                       |           |    |         |           |      |      |      |      |      |      |      |      |      |      |      |      |      |      |      |      |           |      |      |      |      |      |      |      |      |      |      |      |      |      |      |      |      |      |      |      |   |   |   |



Supplemental Table 3. A list of phosphorylation sites and their counts in SNU216 and SNU216-LR.

| Protein accession | Protein name                                                              | Site  | Best Ascore <sup>1</sup> | Localization Probability <sup>2</sup> | Total No. |     | SNU216  |           |      |      |      |      |      |      |      |      |      |      |      |      |      |      |      |      | SNU216-LR |      |      |      |      |      |      |      |      |      |      |      |      |      |      |      |      |      |      |      |   |   |
|-------------------|---------------------------------------------------------------------------|-------|--------------------------|---------------------------------------|-----------|-----|---------|-----------|------|------|------|------|------|------|------|------|------|------|------|------|------|------|------|------|-----------|------|------|------|------|------|------|------|------|------|------|------|------|------|------|------|------|------|------|------|---|---|
|                   |                                                                           |       |                          |                                       |           |     | SNU 216 | SNU 216LR | 1_01 | 2_01 | 3_01 | 4_01 | 5_01 | 6_01 | 1_02 | 2_02 | 3_02 | 4_02 | 5_02 | 6_02 | 1_03 | 2_03 | 3_03 | 4_03 | 5_03      | 6_03 | 1_01 | 2_01 | 3_01 | 4_01 | 5_01 | 6_01 | 1_02 | 2_02 | 3_02 | 4_02 | 5_02 | 6_02 | 1_03 | 2_03 | 3_03 | 4_03 | 5_03 | 6_03 |   |   |
| IP100180292       | Isoform 5 of Brain-specific angiogenesis inhibitor 1-associated protein 2 | S 325 | 100% (30.83)             | 0.9984                                | + 3       | + 1 | 0       | 0         | 1    | 0    | 0    | 0    | 0    | 0    | 0    | 0    | 0    | 1    | 0    | 0    | 0    | 0    | 1    | 0    | 0         | 0    | 0    | 0    | 0    | 0    | 0    | 0    | 0    | 0    | 0    | 0    | 0    | 0    | 0    | 0    | 0    | 0    | 1    | 0    | 0 |   |
| IP100185159       | Isoform 4 of Brain-specific angiogenesis inhibitor 1-associated protein 2 | S 325 | 100% (30.83)             | 0.9984                                | + 3       | + 1 | 0       | 0         | 1    | 0    | 0    | 0    | 0    | 0    | 0    | 0    | 0    | 1    | 0    | 0    | 0    | 0    | 1    | 0    | 0         | 0    | 0    | 0    | 0    | 0    | 0    | 0    | 0    | 0    | 0    | 0    | 0    | 0    | 0    | 0    | 0    | 0    | 1    | 0    | 0 |   |
| IP100299088       | Isoform 1 of Brain-specific angiogenesis inhibitor 1-associated protein 2 | S 325 | 100% (30.83)             | 0.9984                                | + 3       | + 1 | 0       | 0         | 1    | 0    | 0    | 0    | 0    | 0    | 0    | 0    | 0    | 1    | 0    | 0    | 0    | 0    | 1    | 0    | 0         | 0    | 0    | 0    | 0    | 0    | 0    | 0    | 0    | 0    | 0    | 0    | 0    | 0    | 0    | 0    | 0    | 0    | 1    | 0    | 0 |   |
| IP100301421       | Isoform 1 of Nuclear-interacting partner of ALK                           | S 335 | 100% (30.83)             | 0.9984                                | + 4       | + 7 | 0       | 0         | 1    | 0    | 0    | 0    | 0    | 0    | 0    | 0    | 1    | 0    | 0    | 0    | 0    | 1    | 0    | 1    | 0         | 0    | 0    | 1    | 1    | 1    | 0    | 0    | 0    | 1    | 0    | 1    | 0    | 0    | 0    | 0    | 0    | 1    | 0    | 0    |   |   |
| IP100302829       | Retinoblastoma-associated protein                                         | S 807 | 100% (30.83)             | 0.9984                                | 0         | + 4 | 0       | 0         | 0    | 0    | 0    | 0    | 0    | 0    | 0    | 0    | 0    | 0    | 0    | 0    | 0    | 0    | 0    | 0    | 0         | 0    | 1    | 0    | 0    | 0    | 0    | 0    | 1    | 0    | 0    | 0    | 0    | 0    | 0    | 2    | 0    | 0    | 0    | 0    | 0 |   |
| IP100339382       | Isoform 2 of Nuclear-interacting partner of ALK                           | S 314 | 100% (30.83)             | 0.9984                                | + 4       | + 7 | 0       | 0         | 1    | 0    | 0    | 0    | 0    | 0    | 0    | 0    | 1    | 0    | 0    | 0    | 0    | 1    | 0    | 1    | 0         | 0    | 0    | 1    | 1    | 1    | 0    | 0    | 0    | 1    | 0    | 1    | 0    | 0    | 0    | 0    | 1    | 0    | 1    | 0    | 0 | 0 |
| IP100644120       | Isoform 2 of Brain-specific angiogenesis inhibitor 1-associated protein 2 | S 325 | 100% (30.83)             | 0.9984                                | + 3       | + 1 | 0       | 0         | 1    | 0    | 0    | 0    | 0    | 0    | 0    | 0    | 0    | 1    | 0    | 0    | 0    | 0    | 1    | 0    | 0         | 0    | 0    | 0    | 0    | 0    | 0    | 0    | 0    | 0    | 0    | 0    | 0    | 0    | 0    | 0    | 0    | 0    | 0    | 1    | 0 | 0 |
| IP100647603       | Isoform 3 of Brain-specific angiogenesis inhibitor 1-associated protein 2 | S 325 | 100% (30.83)             | 0.9984                                | + 3       | + 1 | 0       | 0         | 1    | 0    | 0    | 0    | 0    | 0    | 0    | 0    | 0    | 1    | 0    | 0    | 0    | 0    | 1    | 0    | 0         | 0    | 0    | 0    | 0    | 0    | 0    | 0    | 0    | 0    | 0    | 0    | 0    | 0    | 0    | 0    | 0    | 0    | 0    | 1    | 0 | 0 |
| IP100054042       | Isoform 1 of General transcription factor II-I                            | S 517 | 100% (27.83)             | 0.9984                                | 0         | + 2 | 0       | 0         | 0    | 0    | 0    | 0    | 0    | 0    | 0    | 0    | 0    | 0    | 0    | 0    | 0    | 0    | 0    | 0    | 0         | 0    | 0    | 0    | 0    | 0    | 0    | 0    | 0    | 0    | 0    | 0    | 0    | 0    | 0    | 1    | 0    | 0    | 0    | 0    |   |   |
| IP100217449       | Isoform 3 of General transcription factor II-I                            | S 497 | 100% (27.83)             | 0.9984                                | 0</       |     |         |           |      |      |      |      |      |      |      |      |      |      |      |      |      |      |      |      |           |      |      |      |      |      |      |      |      |      |      |      |      |      |      |      |      |      |      |      |   |   |



Supplemental Table 3. A list of phosphorylation sites and their counts in SNU216 and SNU216-LR.

| Protein accession | Protein name                                                                               | Site   | Best Ascore <sup>1</sup> | Localization Probability <sup>2</sup> | Total No. |   | SNU216  |           |      |      |      |      |      |      |      |      |      |      |      |      |      |      |      |      | SNU216-LR |      |      |      |      |      |      |      |      |      |      |      |      |      |      |      |      |      |      |      |   |   |   |   |   |
|-------------------|--------------------------------------------------------------------------------------------|--------|--------------------------|---------------------------------------|-----------|---|---------|-----------|------|------|------|------|------|------|------|------|------|------|------|------|------|------|------|------|-----------|------|------|------|------|------|------|------|------|------|------|------|------|------|------|------|------|------|------|------|---|---|---|---|---|
|                   |                                                                                            |        |                          |                                       |           |   | SNU 216 | SNU 216LR | 1_01 | 2_01 | 3_01 | 4_01 | 5_01 | 6_01 | 1_02 | 2_02 | 3_02 | 4_02 | 5_02 | 6_02 | 1_03 | 2_03 | 3_03 | 4_03 | 5_03      | 6_03 | 1_01 | 2_01 | 3_01 | 4_01 | 5_01 | 6_01 | 1_02 | 2_02 | 3_02 | 4_02 | 5_02 | 6_02 | 1_03 | 2_03 | 3_03 | 4_03 | 5_03 | 6_03 |   |   |   |   |   |
| IP100010728       | 203 kDa protein                                                                            | S 1534 | 100% (26.31)             | 0.9977                                | 1         | 0 | 0       | 0         | 0    | 0    | 0    | 0    | 1    | 0    | 0    | 0    | 0    | 0    | 0    | 0    | 0    | 0    | 0    | 0    | 0         | 0    | 0    | 0    | 0    | 0    | 0    | 0    | 0    | 0    | 0    | 0    | 0    | 0    | 0    | 0    | 0    | 0    | 0    | 0    | 0 | 0 | 0 | 0 | 0 |
| IP100012268       | 26S proteasome non-ATPase regulatory subunit 2                                             | S 361  | 100% (26.31)             | 0.9977                                | 1         | 0 | 0       | 0         | 0    | 0    | 0    | 0    | 0    | 0    | 0    | 1    | 0    | 0    | 0    | 0    | 0    | 0    | 0    | 0    | 0         | 0    | 0    | 0    | 0    | 0    | 0    | 0    | 0    | 0    | 0    | 0    | 0    | 0    | 0    | 0    | 0    | 0    | 0    | 0    | 0 | 0 | 0 | 0 | 0 |
| IP100020928       | Transcription factor A, mitochondrial precursor                                            | S 193  | 100% (26.31)             | 0.9977                                | 0         | 1 | 0       | 0         | 0    | 0    | 0    | 0    | 0    | 0    | 0    | 0    | 0    | 0    | 0    | 0    | 0    | 0    | 0    | 0    | 0         | 0    | 0    | 0    | 0    | 0    | 0    | 0    | 0    | 0    | 0    | 0    | 0    | 0    | 0    | 0    | 0    | 0    | 0    | 0    | 0 | 0 | 0 | 1 | 0 |
| IP100021167       | Isoform 1 of Interferon-inducible double stranded RNA-dependent protein kinase activator A | S 18   | 100% (26.31)             | 0.9977                                | 4         | 3 | 0       | 0         | 0    | 0    | 1    | 0    | 0    | 0    | 0    | 0    | 0    | 2    | 0    | 0    | 0    | 0    | 0    | 0    | 1         | 0    | 0    | 0    | 0    | 0    | 0    | 0    | 0    | 0    | 0    | 0    | 0    | 0    | 0    | 0    | 0    | 0    | 0    | 0    | 0 | 0 | 0 | 0 | 0 |
| IP100021537       | Isoform 1 of Opioid growth factor receptor                                                 | S 597  | 100% (26.31)             | 0.9977                                | 2         | 5 | 0       | 2         | 0    | 0    | 0    | 0    | 0    | 0    | 0    | 0    | 0    | 0    | 0    | 0    | 0    | 0    | 0    | 0    | 0         | 0    | 0    | 2    | 0    | 0    | 0    | 0    | 0    | 0    | 0    | 0    | 0    | 0    | 0    | 0    | 0    | 0    | 0    | 0    | 0 | 0 | 0 | 0 | 0 |
| IP100025310       | Zinc finger protein 217                                                                    | S 407  | 100% (26.31)             | 0.9977                                | 6         | 6 | 1       | 2         | 0    | 0    | 0    | 0    | 0    | 0    | 0    | 2    | 0    | 0    | 0    | 0    | 0    | 0    | 0    | 0    | 0         | 0    | 1    | 2    | 0    | 0    | 0    | 0    | 0    | 0    | 0    | 0    | 0    | 0    | 0    | 0    | 0    | 0    | 0    | 0    | 0 | 0 | 0 | 0 | 0 |
| IP100044583       | Isoform 1 of Transcriptional-regulating factor 1                                           | S 621  | 100% (26.31)             | 0.9977                                | 2         | 3 | 0       | 0         | 0    | 0    | 0    | 0    | 0    | 0    | 2    | 0    | 0    | 0    | 0    | 0    | 0    | 0    | 0    | 0    | 0         | 0    | 1    | 0    | 0    | 0    | 0    | 0    | 0    | 0    | 0    | 0    | 0    | 0    | 0    | 0    | 0    | 0    | 0    | 0    | 0 | 0 | 0 | 0 | 0 |
| IP100160131       | Myosin-Dx                                                                                  | S 1299 | 100% (26.31)             | 0.9977                                | 2         | 2 | 1       | 0         | 0    | 0    | 0    | 0    | 0    | 0    | 0    | 0    | 0    | 0    | 0    | 0    | 0    | 1    | 0    | 0    | 0         | 0    | 0    | 1    | 0    | 0    | 0    | 0    | 0    | 0    | 0    | 0    | 0    | 0    | 0    | 0    | 0    | 0    | 0    | 0    | 0 | 0 | 0 | 0 |   |
| IP100219301       | Myristoylated alanine-rich C-kinase substrate                                              |        |                          |                                       |           |   |         |           |      |      |      |      |      |      |      |      |      |      |      |      |      |      |      |      |           |      |      |      |      |      |      |      |      |      |      |      |      |      |      |      |      |      |      |      |   |   |   |   |   |

Supplemental Table 3. A list of phosphorylation sites and their counts in SNU216 and SNU216-LR.

| Protein accession | Protein name                                                    | Site  | Best Ascore <sup>1</sup> | Localization Probability <sup>2</sup> | Total No. |   | SNU216  |           |      |      |      |      |      |      |      |      |      |      |      |      |      |      | SNU216-LR |      |      |      |      |      |      |      |      |      |      |      |      |      |      |      |      |      |      |      |      |      |   |   |
|-------------------|-----------------------------------------------------------------|-------|--------------------------|---------------------------------------|-----------|---|---------|-----------|------|------|------|------|------|------|------|------|------|------|------|------|------|------|-----------|------|------|------|------|------|------|------|------|------|------|------|------|------|------|------|------|------|------|------|------|------|---|---|
|                   |                                                                 |       |                          |                                       |           |   | SNU 216 | SNU 216LR | 1_01 | 2_01 | 3_01 | 4_01 | 5_01 | 6_01 | 1_02 | 2_02 | 3_02 | 4_02 | 5_02 | 6_02 | 1_03 | 2_03 | 3_03      | 4_03 | 5_03 | 6_03 | 1_01 | 2_01 | 3_01 | 4_01 | 5_01 | 6_01 | 1_02 | 2_02 | 3_02 | 4_02 | 5_02 | 6_02 | 1_03 | 2_03 | 3_03 | 4_03 | 5_03 | 6_03 |   |   |
| IP100472094       | Isoform 3 of Microtubule-associated protein 2                   | S 829 | 100% (28.96)             | 0.9975                                | 1         | 9 | 2       | 0         | 0    | 0    | 0    | 0    | 0    | 0    | 2    | 0    | 0    | 0    | 0    | 0    | 0    | 3    | 0         | 0    | 0    | 0    | 0    | 3    | 0    | 0    | 0    | 0    | 0    | 0    | 3    | 0    | 0    | 0    | 0    | 0    | 3    | 0    | 0    | 0    | 0 | 0 |
| IP100306825       | Isoform 1 of Tumor protein D54                                  | S 166 | 100% (25.95)             | 0.9975                                | 2         | 4 | 0       | 0         | 0    | 0    | 0    | 0    | 0    | 0    | 0    | 0    | 0    | 0    | 1    | 0    | 0    | 0    | 0         | 0    | 1    | 0    | 0    | 0    | 0    | 0    | 0    | 1    | 0    | 0    | 0    | 0    | 1    | 0    | 1    | 0    | 0    | 0    | 1    | 0    |   |   |
| IP100399265       | tumor protein D52-like 2 isoform a                              | S 189 | 100% (25.95)             | 0.9975                                | 2         | 4 | 0       | 0         | 0    | 0    | 0    | 0    | 0    | 0    | 0    | 0    | 0    | 0    | 1    | 0    | 0    | 0    | 0         | 0    | 1    | 0    | 0    | 0    | 0    | 0    | 1    | 0    | 0    | 0    | 0    | 1    | 0    | 1    | 0    | 0    | 0    | 1    | 0    |      |   |   |
| IP100399267       | tumor protein D52-like 2 isoform c                              | S 180 | 100% (25.95)             | 0.9975                                | 2         | 4 | 0       | 0         | 0    | 0    | 0    | 0    | 0    | 0    | 0    | 0    | 0    | 0    | 1    | 0    | 0    | 0    | 0         | 0    | 1    | 0    | 0    | 0    | 0    | 0    | 1    | 0    | 0    | 0    | 0    | 1    | 0    | 1    | 0    | 0    | 0    | 1    | 0    |      |   |   |
| IP100104050       | Thyroid hormone receptor-associated protein 3                   | S 243 | 100% (25.95)             | 0.9975                                | 5         | 5 | 1       | 0         | 0    | 0    | 0    | 0    | 0    | 0    | 1    | 1    | 0    | 0    | 0    | 0    | 1    | 0    | 1         | 0    | 0    | 0    | 1    | 1    | 0    | 0    | 0    | 1    | 1    | 0    | 0    | 0    | 0    | 1    | 0    | 0    | 0    | 0    | 0    |      |   |   |
| IP100456887       | Scaffold attachment factor A2                                   | S 185 | 100% (25.95)             | 0.9975                                | 3         | 5 | 1       | 0         | 0    | 0    | 0    | 0    | 0    | 0    | 0    | 0    | 0    | 0    | 0    | 0    | 1    | 1    | 0         | 0    | 0    | 0    | 1    | 1    | 0    | 0    | 0    | 0    | 1    | 1    | 0    | 0    | 0    | 0    | 1    | 1    | 0    | 0    | 0    | 0    |   |   |
| IP100741728       | PREDICTED: similar to heterogeneous nuclear ribonucleoprotein U | S 342 | 100% (25.95)             | 0.9975                                | 3         | 5 | 1       | 0         | 0    | 0    | 0    | 0    | 0    | 0    | 0    | 0    | 0    | 0    | 0    | 0    | 1    | 1    | 0         | 0    | 0    | 0    | 1    | 1    | 0    | 0    | 0    | 0    | 1    | 1    | 0    | 0    | 0    | 0    | 1    | 1    | 0    | 0    | 0    | 0    |   |   |
| IP100299417       | Protein C22orf19                                                | S 312 | 100% (28.91)             | 0.9974                                | 7         | 7 | 0       | 2         | 1    | 0    | 0    | 0    | 0    | 0    | 2    | 0    | 0    | 0    | 0    | 0    | 0    | 2    | 0         | 0    | 0    | 0    | 0    | 2    | 0    | 0    | 0    | 0    | 0    | 2    | 1    | 0    | 0    | 0    | 0    | 2    | 0    | 0    | 0    | 0    |   |   |
| IP100020021       | Protein DEK                                                     | S 306 | 100% (17.57)             | 0.9974                                | 0         | 3 | 0       | 0         | 0    | 0    | 0    | 0    | 0    | 0    | 0    | 0    | 0    | 0    | 0    | 0    | 0    | 0    | 0         | 0    | 0    | 0    | 0    | 0    | 0    | 1    | 0    | 0    | 0    | 0    | 0    | 0    | 0    | 0    | 0    | 0    | 0    | 2    | 0    | 0    |   |   |
| IP100552897       | Isoform 1 of Mediator of DNA damage checkpoint protein 1        | S 4   |                          |                                       |           |   |         |           |      |      |      |      |      |      |      |      |      |      |      |      |      |      |           |      |      |      |      |      |      |      |      |      |      |      |      |      |      |      |      |      |      |      |      |      |   |   |

Supplemental Table 3. A list of phosphorylation sites and their counts in SNU216 and SNU216-LR.

| Protein accession | Protein name                                                       | Site   | Best Ascore <sup>1</sup> | Localization Probability <sup>2</sup> | Total No. |           | SNU216 |      |      |      |      |      |      |      |      |      |      |      |      |      |      |      | SNU216-LR |      |      |      |      |      |      |      |      |      |      |      |      |      |      |      |      |      |      |      |   |   |
|-------------------|--------------------------------------------------------------------|--------|--------------------------|---------------------------------------|-----------|-----------|--------|------|------|------|------|------|------|------|------|------|------|------|------|------|------|------|-----------|------|------|------|------|------|------|------|------|------|------|------|------|------|------|------|------|------|------|------|---|---|
|                   |                                                                    |        |                          |                                       | SNU 216   | SNU 216LR | 1_01   | 2_01 | 3_01 | 4_01 | 5_01 | 6_01 | 1_02 | 2_02 | 3_02 | 4_02 | 5_02 | 6_02 | 1_03 | 2_03 | 3_03 | 4_03 | 5_03      | 6_03 | 1_01 | 2_01 | 3_01 | 4_01 | 5_01 | 6_01 | 1_02 | 2_02 | 3_02 | 4_02 | 5_02 | 6_02 | 1_03 | 2_03 | 3_03 | 4_03 | 5_03 | 6_03 |   |   |
| IP100759680       | Isoform 3 of Bromodomain-containing protein 9                      | S 450  | 100% (33.81)             | 0.9971                                | 2         | 0         | 0      | 0    | 1    | 0    | 0    | 0    | 0    | 0    | 0    | 0    | 0    | 0    | 0    | 0    | 0    | 1    | 0         | 0    | 0    | 0    | 0    | 0    | 0    | 0    | 0    | 0    | 0    | 0    | 0    | 0    | 0    | 0    | 0    | 0    | 0    | 0    | 0 | 0 |
| IP100216044       | Isoform 1 of RNA-binding protein Raly                              | S 272  | 100% (26.57)             | 0.9971                                | 31        | 27        | 1      | 0    | 2    | 6    | 2    | 0    | 0    | 0    | 2    | 6    | 1    | 1    | 2    | 0    | 0    | 6    | 1         | 1    | 0    | 0    | 2    | 3    | 1    | 0    | 2    | 0    | 3    | 3    | 0    | 2    | 2    | 0    | 2    | 6    | 1    | 0    | 0 | 0 |
| IP100181702       | Isoform 1 of Splicing factor, arginine/serine-rich 15              | S 154  | 100% (28.34)             | 0.9971                                | 19        | 17        | 3      | 3    | 0    | 1    | 0    | 0    | 3    | 2    | 0    | 0    | 0    | 0    | 3    | 3    | 0    | 1    | 0         | 0    | 4    | 3    | 0    | 0    | 0    | 0    | 2    | 3    | 0    | 0    | 0    | 0    | 0    | 3    | 2    | 0    | 0    | 0    | 0 |   |
| IP100397794       | Isoform 2 of Splicing factor, arginine/serine-rich 15              | S 154  | 100% (28.34)             | 0.9971                                | 19        | 17        | 3      | 3    | 0    | 1    | 0    | 0    | 3    | 2    | 0    | 0    | 0    | 0    | 3    | 3    | 0    | 1    | 0         | 0    | 4    | 3    | 0    | 0    | 0    | 2    | 3    | 0    | 0    | 0    | 0    | 0    | 3    | 2    | 0    | 0    | 0    | 0    | 0 |   |
| IP100306933       | Isoform Short of Myosin-9B                                         | S 1405 | 100% (30.10)             | 0.9971                                | 3         | 6         | 1      | 0    | 0    | 0    | 0    | 0    | 1    | 0    | 0    | 0    | 0    | 0    | 1    | 0    | 0    | 0    | 0         | 0    | 2    | 0    | 0    | 0    | 0    | 3    | 0    | 0    | 0    | 0    | 0    | 0    | 1    | 0    | 0    | 0    | 0    | 0    | 0 |   |
| IP100336047       | Isoform Long of Myosin-9B                                          | S 1405 | 100% (30.10)             | 0.9971                                | 3         | 6         | 1      | 0    | 0    | 0    | 0    | 0    | 1    | 0    | 0    | 0    | 0    | 0    | 1    | 0    | 0    | 0    | 0         | 0    | 2    | 0    | 0    | 0    | 0    | 3    | 0    | 0    | 0    | 0    | 0    | 0    | 1    | 0    | 0    | 0    | 0    | 0    | 0 |   |
| IP100023234       | Ubiquitin-like 1-activating enzyme E1B                             | S 207  | 100% (25.31)             | 0.9971                                | 0         | 1         | 0      | 0    | 0    | 0    | 0    | 0    | 0    | 0    | 0    | 0    | 0    | 0    | 0    | 0    | 0    | 0    | 0         | 0    | 0    | 1    | 0    | 0    | 0    | 0    | 0    | 0    | 0    | 0    | 0    | 0    | 0    | 0    | 0    | 0    | 0    | 0    | 0 |   |
| IP100305589       | Isoform 1 of 6-phosphofructo-2-kinase/fructose-2,6-biphosphatase 2 | S 493  | 100% (28.31)             | 0.9971                                | 1         | 1         | 0      | 0    | 0    | 0    | 0    | 0    | 0    | 0    | 0    | 0    | 0    | 0    | 0    | 0    | 0    | 1    | 0         | 0    | 0    | 0    | 0    | 1    | 0    | 0    | 0    | 0    | 0    | 0    | 0    | 0    | 0    | 0    | 0    | 0    | 0    | 0    | 0 |   |
| IP100640055       | Novel protein                                                      | S 606  | 100% (12.65)             | 0.9971                                | 8         | 4         | 0      | 1    | 1    | 0    | 0    | 0    | 2    | 1    | 0    | 0    | 0    | 0    | 0    | 2    | 1    | 0    | 0         | 0    | 0    | 1    | 0    | 0    | 0    | 0    | 2    | 0    | 0    | 0    | 0    | 0    | 0    | 0    | 0    | 0    | 1    | 0    | 0 | 0 |
| IP100395887       | Thioredoxin domain-containing protein 1 precursor                  | S 270  | 100% (28.30)             | 0.9970                                | 2         | 3         | 0      | 0    | 0    | 0    | 1    | 0    | 0    | 0    | 0    | 0    | 1    | 0    | 0    | 0    | 0    | 0    | 0         | 0    | 0    | 0    | 0    | 0    | 0    | 0    | 0    | 0    | 0    | 0    | 0    | 1    | 1    | 0    | 0    | 0    | 1    | 0    | 0 |   |
| IP100012079       | Eukaryotic translation initiation factor 4B                        | S 93   | 100% (31.27)             | 0.9970                                | 3         | 6         | 0      | 1    | 0    | 0    | 0    | 0    | 1    | 0    | 0    | 0    | 0    | 0    | 0    | 1    | 0    | 0    | 0         | 0    | 1    | 2    | 0    | 0    | 0    | 0    | 2    | 0    | 0    | 0    | 0    | 0    | 0    | 0    | 1    | 0    | 0    | 0    | 0 |   |
| IP100297593       | Ubiquitin-specific proteinase 34                                   | S 3406 | 100% (31.27)             | 0.9970                                | 1         | 1         | 0      | 0    | 0    | 0    | 0    | 0    | 0    | 0    | 0    | 0    | 0    | 0    | 1    | 0    | 0    | 0    | 0         | 0    | 0    | 0    | 0    | 0    | 0    | 0    | 0    | 0    | 0    | 0    | 0    | 0    | 0    | 1    | 0    | 0    | 0    | 0    |   |   |
| IP100021175       | Cell division cycle 2-related protein kinase 7                     | S 274  | 100% (32.22)             | 0.9970                                | 5         | 4         | 1      | 0    | 0    | 0    | 0    | 0    | 2    | 0    | 0    | 0    | 0    | 0    | 2    | 0    | 0    | 0    | 0         | 0    | 1    | 0    | 0    | 0    | 0    | 0    | 0    | 0    | 0    | 0    | 0    | 0    | 0    | 3    | 0    | 0    | 0    | 0    | 0 |   |
| IP100043638       | Isoform 2 of La-related protein 4                                  | S 484  | 100% (32.22)             | 0.9970                                | 1         | 5         | 0      | 1    | 0    | 0    | 0    | 0    | 0    | 0    | 0    | 0    | 0    | 0    | 0    | 0    | 0    | 0    | 0         | 0    | 1    | 1    | 0    | 0    | 0    | 0    | 2    | 0    | 0    | 0    | 0    | 0    | 0    | 0    | 1    | 0    | 0    | 0    | 0 |   |
| IP100395347       | c-Mpl binding protein isoform a                                    | S 583  | 100% (32.22)             | 0.9970                                | 1         | 5         | 0      | 1    | 0    | 0    | 0    | 0    | 0    | 0    | 0    | 0    | 0    | 0    | 0    | 0    | 0    | 0    | 0         | 0    | 1    | 1    | 0    | 0    | 0    | 0    | 2    | 0    | 0    | 0    | 0    | 0    | 0    | 0    | 1    | 0    | 0    | 0    | 0 |   |
| IP100395837       | c-Mpl binding protein isoform c                                    | S 512  | 100% (32.22)             | 0.9970                                | 1         | 5         | 0      | 1    | 0    | 0    | 0    | 0    | 0    | 0    | 0    | 0    | 0    | 0    | 0    | 0    | 0    | 0    | 0         | 0    | 1    | 1    | 0    | 0    | 0    | 2    | 0    | 0    | 0    | 0    | 0    | 0    | 0    | 1    | 0    | 0    | 0    | 0    |   |   |
| IP100418689       | c-Mpl binding protein isoform b                                    | S 589  | 100% (32.22)             | 0.9970                                | 1         | 5         | 0      | 1    | 0    | 0    | 0    | 0    | 0    | 0    | 0    | 0    | 0    | 0    | 0    | 0    | 0    | 0    | 0         | 0    | 1    | 1    | 0    | 0    | 0    | 2    | 0    | 0    | 0    | 0    | 0    | 0    | 0    | 1    | 0    | 0    | 0    | 0    |   |   |
| IP100472779       | Ankyrin-3                                                          | S 524  | 100% (32.22)             | 0.9970                                | 0         | 1         | 0      | 0    | 0    | 0    | 0    | 0    | 0    | 0    | 0    | 0    | 0    | 0    | 0    | 0    | 0    | 0    | 0         | 1    | 0    | 0    | 0    | 0    | 0    | 0    | 0    | 0    | 0    | 0    | 0    | 0    | 0    | 0    | 0    | 0    | 0    | 0    | 0 |   |
| IP100478210       | ankyrin 3 isoform 1                                                | S 524  | 100% (32.22)             | 0.9970                                | 0         | 1         | 0      | 0    | 0    | 0    | 0    | 0    | 0    | 0    | 0    | 0    | 0    | 0    | 0    | 0    | 0    | 0    | 0         | 1    | 0    | 0    | 0    | 0    | 0    | 0    | 0    | 0    | 0    | 0    | 0    | 0    | 0    | 0    | 0    | 0    | 0    | 0    | 0 |   |
| IP100643996       | 68 kDa protein                                                     | S 490  | 100% (32.22)             | 0.9970                                | 1         | 5         | 0      | 1    | 0    | 0    | 0    | 0    | 0    | 0    | 0    | 0    | 0    | 0    | 0    | 0    | 0    | 0    | 0         | 0    | 1    | 1    | 0    | 0    | 0    | 2    | 0    | 0    | 0    | 0    | 0    | 0    | 0    | 1    | 0    | 0    | 0    | 0    | 0 |   |
| IP100472044       | Isoform 1 of GTPase-activating Rap/Ran-GAP domain-like 1           | S 908  | 100% (13.38)             | 0.9970                                | 2         | 0         | 1      | 0    | 0    | 0    | 0    | 0    | 1    | 0    | 0    | 0    | 0    | 0    | 0    | 0    | 0    | 0    | 0         | 0    | 0    | 0    | 0    | 0    | 0    | 0    | 0    | 0    | 0    | 0    | 0    | 0    | 0    | 0    | 0    | 0    | 0    | 0    | 0 |   |
| IP100002564       | DNA-repair protein XRCC1                                           | S 578  | 100% (19.39)             | 0.9970                                | 0         | 1         | 0      | 0    | 0    | 0    | 0    | 0    | 0    | 0    | 0    | 0    | 0    | 0    | 0    | 0    | 0    | 0    | 0         | 0    | 0    | 0    | 0    | 1    | 0    | 0    | 0    | 0    | 0    | 0    | 0    | 0    | 0    | 0    | 0    | 0    | 0    | 0    | 0 |   |
| IP100644127       | Isoleucyl-tRNA synthetase, cytoplasmic                             | S 1053 | 100% (35.36)             | 0.9970                                | 4         | 6         | 0      | 1    | 0    | 0    | 0    | 0    | 1    | 0    | 0    | 0    | 0    | 0    | 0    | 1    | 1    | 0    | 0         | 0    | 1    | 2    | 0    | 0    | 0    | 0    | 1    | 0    | 0    | 0    | 0    | 0    | 0    | 0    | 0    | 1    | 1    | 0    | 0 | 0 |
| IP100166680       | Isoform 3 of Misshapen-like kinase 1                               | S 641  | 100% (28.13)             | 0.9969                                | 0         | 2         | 0      | 0    | 0    | 0    | 0    | 0    | 0    | 0    | 0    | 0    | 0    | 0    | 0    | 0    | 0    | 0    | 0         | 0    | 0    | 0    | 0    | 0    | 0    | 0    | 0    | 0    | 0    | 0    | 0    | 0    | 0    | 1    | 0    | 0    | 0    | 0    |   |   |
| IP100642705       | Isoform 2 of AT-rich interactive domain-containing protein 1A      | S 363  | 100% (28.13)             | 0.9969                                | 4         | 2         | 1      | 0    | 0    | 0    | 0    | 0    | 1    | 1    | 0    | 0    | 0    | 0    | 0    | 1    | 0    | 0    | 0         | 0    | 1    | 0    | 0    | 0    | 0    | 0    | 0    | 0    | 0    | 0    | 0    | 0    | 0    | 0    | 1    | 0    | 0    | 0    | 0 |   |
| IP100643722       | Isoform 1 of AT-rich interactive domain-containing protein 1A      | S 363  | 100% (28.13)             | 0.9969                                | 4         | 2         | 1      | 0    | 0    | 0    | 0    | 0    | 1    | 1    | 0    | 0    | 0    | 0    | 0    | 1    | 0    | 0    | 0         | 0    | 1    | 0    | 0    | 0    | 0    | 0    | 0    | 0    | 0    | 0    | 0    | 0    | 0    | 0    | 1    | 0    | 0    | 0    | 0 |   |
| IP100328798       | DLN811 protein                                                     | S 1017 | 100% (25.11)             | 0.9969                                | 2         | 2         | 1      | 0    | 0    | 0    | 0    | 0    | 1    | 0    | 0    | 0    | 0    | 0    | 0    | 0    | 0    | 0    | 0         | 0    | 0    | 0    | 0    | 0    | 0    | 0    | 0    | 0    | 0    | 0    | 0    | 1    | 0    | 0    | 0    | 0    | 0    | 0    | 0 |   |
| IP100027157       | CENP-F kinetochore protein                                         | S 595  | 100% (25.11)             | 0.9969                                | 1         | 0         | 0      | 0    | 0    | 0    | 0    | 0    | 1    | 0    | 0    | 0    | 0    | 0    | 0    | 0    | 0    | 0    | 0         | 0    | 0    | 0    | 0    | 0    | 0    | 0    | 0    | 0    | 0    | 0    | 0    | 0    | 0    | 0    | 0    | 0    | 0    | 0    | 0 |   |
| IP100298618       | CDNA FLJ36810 fis, clone ASTRO2001249                              | S 159  | 100% (25.11)             | 0.9969                                | 1         | 1         | 0      | 0    | 0    |      |      |      |      |      |      |      |      |      |      |      |      |      |           |      |      |      |      |      |      |      |      |      |      |      |      |      |      |      |      |      |      |      |   |   |

Supplemental Table 3. A list of phosphorylation sites and their counts in SNU216 and SNU216-LR.

| Protein accession | Protein name                                             | Site   | Best Ascore <sup>1</sup> | Localization Probability <sup>2</sup> | Total No. |   | SNU216  |           |      |      |      |      |      |      |      |      |      |      |      |      |      |      |      |      | SNU216-LR |      |      |      |      |      |      |      |      |      |      |      |      |      |      |      |      |      |      |      |   |
|-------------------|----------------------------------------------------------|--------|--------------------------|---------------------------------------|-----------|---|---------|-----------|------|------|------|------|------|------|------|------|------|------|------|------|------|------|------|------|-----------|------|------|------|------|------|------|------|------|------|------|------|------|------|------|------|------|------|------|------|---|
|                   |                                                          |        |                          |                                       |           |   | SNU 216 | SNU 216LR | 1_01 | 2_01 | 3_01 | 4_01 | 5_01 | 6_01 | 1_02 | 2_02 | 3_02 | 4_02 | 5_02 | 6_02 | 1_03 | 2_03 | 3_03 | 4_03 | 5_03      | 6_03 | 1_01 | 2_01 | 3_01 | 4_01 | 5_01 | 6_01 | 1_02 | 2_02 | 3_02 | 4_02 | 5_02 | 6_02 | 1_03 | 2_03 | 3_03 | 4_03 | 5_03 | 6_03 |   |
| IP100216689       | Poly(rC)-binding protein 2                               | S 189  | 100% (24.44)             | 0.9964                                | 8         | 9 | 0       | 0         | 0    | 1    | 1    | 0    | 0    | 0    | 0    | 0    | 1    | 2    | 0    | 0    | 0    | 0    | 2    | 1    | 0         | 0    | 0    | 0    | 2    | 0    | 0    | 0    | 0    | 0    | 0    | 2    | 2    | 0    | 0    | 0    | 0    | 1    | 2    | 0    |   |
| IP100217851       | PHACTR4 protein                                          | S 118  | 100% (24.44)             | 0.9964                                | 3         | 4 | 0       | 0         | 0    | 0    | 1    | 0    | 0    | 0    | 0    | 0    | 0    | 1    | 0    | 0    | 0    | 0    | 0    | 1    | 0         | 0    | 0    | 0    | 1    | 0    | 0    | 0    | 1    | 1    | 0    | 0    | 0    | 0    | 0    | 1    | 0    | 0    | 1    | 0    |   |
| IP100432436       | PHACTR4 protein                                          | S 102  | 100% (24.44)             | 0.9964                                | 3         | 4 | 0       | 0         | 0    | 0    | 1    | 0    | 0    | 0    | 0    | 0    | 0    | 1    | 0    | 0    | 0    | 0    | 0    | 1    | 0         | 0    | 0    | 0    | 1    | 0    | 0    | 0    | 1    | 1    | 0    | 0    | 0    | 0    | 0    | 1    | 0    | 0    | 1    | 0    |   |
| IP100657967       | 79 kDa protein                                           | S 128  | 100% (24.44)             | 0.9964                                | 3         | 4 | 0       | 0         | 0    | 0    | 1    | 0    | 0    | 0    | 0    | 0    | 0    | 1    | 0    | 0    | 0    | 0    | 0    | 1    | 0         | 0    | 0    | 0    | 1    | 0    | 0    | 0    | 1    | 1    | 0    | 0    | 0    | 0    | 0    | 1    | 0    | 0    | 0    | 1    | 0 |
| IP100217686       | Putative rRNA methyltransferase 3                        | S 336  | 100% (29.32)             | 0.9964                                | 4         | 1 | 0       | 1         | 0    | 0    | 0    | 0    | 0    | 0    | 1    | 0    | 0    | 0    | 0    | 0    | 2    | 0    | 0    | 0    | 0         | 0    | 0    | 1    | 0    | 0    | 0    | 0    | 0    | 0    | 0    | 0    | 0    | 0    | 0    | 0    | 0    | 0    | 0    | 0    |   |
| IP100552897       | Isoform 1 of Mediator of DNA damage checkpoint protein 1 | S 329  | 100% (13.63)             | 0.9964                                | 3         | 4 | 1       | 0         | 0    | 0    | 0    | 0    | 0    | 0    | 1    | 0    | 0    | 0    | 0    | 0    | 1    | 0    | 0    | 0    | 0         | 0    | 1    | 0    | 0    | 0    | 0    | 0    | 0    | 0    | 0    | 0    | 1    | 0    | 0    | 2    | 0    | 0    | 0    | 0    |   |
| IP100641106       | 227 kDa protein                                          | S 329  | 100% (13.63)             | 0.9964                                | 3         | 4 | 1       | 0         | 0    | 0    | 0    | 0    | 0    | 0    | 1    | 0    | 0    | 0    | 0    | 0    | 1    | 0    | 0    | 0    | 0         | 0    | 1    | 0    | 0    | 0    | 0    | 0    | 0    | 0    | 0    | 0    | 1    | 0    | 0    | 2    | 0    | 0    | 0    | 0    |   |
| IP100158615       | Isoform 1 of THO complex subunit 2                       | S 1316 | 100% (27.35)             | 0.9963                                | 2         | 3 | 0       | 1         | 0    | 0    | 0    | 0    | 0    | 0    | 1    | 0    | 0    | 0    | 0    | 0    | 1    | 0    | 0    | 0    | 0         | 0    | 1    | 0    | 0    | 0    | 0    | 0    | 0    | 1    | 0    | 0    | 0    | 0    | 0    | 1    | 0    | 0    | 0    | 0    |   |
| IP100163644       | Oxysterol-binding protein                                | S 811  | 100% (31.39)             | 0.9963                                | 3         | 3 | 0       | 1         | 0    | 0    | 0    | 0    | 0    | 0    | 1    | 0    | 0    | 0    | 0    | 0    | 0    | 1    | 0    | 0    | 0         | 0    | 0    | 1    | 0    | 0    | 0    | 0    | 0    | 0    | 1    | 0    | 0    | 0    | 0    | 0    | 1    | 0    | 0    | 0    |   |
| IP100394737       | Isoform 2 of Oxysterol-binding protein-related protein 8 |        |                          |                                       |           |   |         |           |      |      |      |      |      |      |      |      |      |      |      |      |      |      |      |      |           |      |      |      |      |      |      |      |      |      |      |      |      |      |      |      |      |      |      |      |   |
